# Supplementary material for: Pediatric acute myeloid leukemia tumor composition predicts patient outcomes at diagnosis and reveals mechanisms of resistance to chemotherapy
Source: Research Square preprint supplement (doi:10.21203/rs.3.rs-4669225/v1), 2026-01-23
Supplement: Supplementary file 1 [file 10dc816cbc5c0b1d2b1f8d61.xlsx]

## Sheet: Sheet1
Patient ID	Age in years	Sex	Karyotype/Fusion	Mutations at Diagnosis	Mutations at Relapse	SCT in CR1	Time to relapse (months)	EOI MRD	Diagnosis blast%	Relapse blast%
PAPZCL	14.9	Male	del(5q)	None identified	NA	Unknown	55.4	Unknown	97	95
PARBIU	16	Female	KMT2A::MLLT3	None identified	NA	No	27	0	99	79
PAUMTZ	9.96986	Male	KMT2A::MLLT10, ins(10;11)	NRAS, PTPN11	NRAS	No	10.9	0	86	82
PAUNSV	13.4	Male	normal	FLT3-ITD*, CEBPa	NA	No	15.4	0	73	86
PAUVAT	8.5	Female	t(10;12)	None identified	NA	No	9.7	0	89	71
PAVBFN	4.9	Male	normal	FLT3-ITD, NPM1c	NA	Unknown	14	0	89	90
PAVTLN	14.9041	Female	NPM1::MLF1; t(3;5)(q25;q34)	FLT3 PM, IDH1	FLT3 PM, IDH1	No	16.5	0	90	56
TCH1	14.9	Male	RUNX1::RUNX1T1	None identified	None identified	No	4.5	0.16	31	15
TCH2	9.7	Male	normal	FLT3-ITD*	FLT3-ITD	Yes	29.3	0.13	33	NA
TCH3	17.1	Female	normal	FLT3-ITD*, NPM1c^, WT1^	FLT3-ITD	No	10.4	0	64	82
TCH4	12.7	Female	t(3;22)	NA	None identified	No	20	0	42	4.5
TCH5	8	Male	KMT2A::MLLT3	NA	NA	No	50.6	0	89	90
TCH6	16.7	Male	KMT2A::MLLT4	PTPN11	NRAS	Yes	7.4	0.04	97	92
PAWNPU**	15	Male	ins(X:11)(q24;q23q23)	NA	NA	NA	NA	NA	NA	88
*FLT3-ITD allelic ratio below threshold for TKI treatment
**Only relapsed sample was available.
NPM1c^, WT1^ were not tested at relapse
SCT: stem cell transplant
CR1: first complete remission
EOI: End of Induction 1
MRD: Measurable residual disease by multiparameter flow cytometry
In all cases, the treatment protocol followed (enrolled or not enrolled) AAML1031
