# Supplementary material for: Pediatric acute myeloid leukemia tumor composition predicts patient outcomes at diagnosis and reveals mechanisms of resistance to chemotherapy
Source: Research Square preprint supplement (doi:10.21203/rs.3.rs-4669225/v1), 2026-01-23
Supplement: Supplementary file 2 [file 2c6c5e0224c22598eac0c96f.xlsx]

## Sheet: Table_S2_ProportionalTable_Meta
Cluster	TCH1.d	TCH1.r	TCH2.d	TCH2.r	TCH3.d	TCH3.r	TCH4.d	TCH4.r	TCH5.d	TCH5.r	TCH6.d	TCH6.r	PAPZCL.d	PAPZCL.r	PARBIU.d	PARBIU.r	PAUMTZ.d	PAUMTZ.r	PAUNSY.d	PAUNSY.r	PAUVAT.d	PAUVAT.r	PAVBFN.d	PAVBFN.r	PAVTLN.d	PAVTLN.r	PAWNPU.r	AML1.d	AML2.d	AML3.d	AML4.d	AML5.d	AML6.d	AML7.d	AML8.d	donor1.n	donor2.n	donor3.n	donor4.n	TCHnorm1.n	TCHnorm2.n.S	TCHnorm2.n.U
0	0.44	0.37	0	0	0.29	0.01	0	0	0.1	0	0	0	0	0	0	0	0.12	0.03	0.1	0.18	0.03	0.03	89.12	86.43	0.05	0.05	1	0	0	0	0	0	0	0.11	0.07	0	0	0	0	0.85	0.02	0.2
1	0	0	0	0	0.07	0	0.09	1.15	0	0	0	0	0.03	0	0	0	0	0.11	64.58	79.47	0.02	0	0.03	0.03	0	0.03	0	0	0	0.21	0	0	0	0	0	0	0	0	0	0.23	0.11	0.2
2	0	0.12	0	0	0.07	0	0	0	0	0	0	0	0	0	0	0.01	0	0	0	0	90.23	0.06	0	0	0.05	0	0	0	0	0	0	0	0	0.11	0.07	0	0	0	0	0.06	0	0
3	0	0	0	0	0	0	0	0	0	0	0	0	0	0	0	0	0	0	0	0.01	1.74	91.65	0	0	0	0	0.05	0	0	0	0	0	0	0	0	0	0	0	0	0	0	0.04
7	0.15	0.73	1.07	0.98	41.05	69.9	0	0.29	0	0	0	0.07	0	0	0	0	0	0	0	0.01	0.01	0	0.01	0	0	0	0.05	0	0	0	0	0	0	0	0.07	0	0	0	0	0	0	0
17	0.24	2.07	8.12	83.91	1.92	1.25	0	0.57	0	0	0	0.28	0	0	0	0	0	0.03	0.01	0	0.03	0	0	0.02	0	0.02	0	0	0	0	0	0	0	0	0	0	0	0	0	0	0.03	0
19	0	0.24	0	0	0	0	0	0	0	0	0	0	0	0	0	0	0	0	0	0	0	0	0	0	0	0	0	1.01	0	40.08	0.07	89.17	0	0	57.58	0	0.39	0.26	0	0	0	0
21	0.24	1.34	33.36	1.3	5.27	20.18	0.46	2.87	0	0.17	0	0	0	0	0	0	0.14	0.03	0.04	0	0.01	0.08	0	0	0.21	0.14	0.09	0	0	0	0	0	0	0	0.14	0	0	0	0	0.74	0.37	1.45
27	66.84	28.26	0.33	0.18	1.43	0.01	0	0.29	0	0	0	0	0	0	0	0	0.02	0.03	0.03	0.01	0.01	0	0	0	0	0	0.09	0	0	0.21	0	0.23	0	0.53	0	0	0	0	0	0.06	0.03	0.04
30	0	0	0	0	0	0	0	0	0	0	0	0	0	0	0	0.01	0	0.03	0.06	0.02	6.5	7.36	0	0.01	0.16	0	0.05	0	0	0	0	0	0	0	0	0	0	0	0	0.17	0.03	0
33	0	0	0	0	0	0	0	0.57	0	0	0	0	0	0	0	0	0	0	0	0	0	0	0	0	0	0	0	2.76	0	0.41	0	0.08	0.28	94.02	0.79	0.31	3.12	3.66	2.46	0.06	0.02	0
42	0	0	0.07	0	0	0.01	0	0	0	0	0	0	0	0	0	0	0	0	0	0.01	0.02	0	0	0	0.05	0	0.05	0	61.29	0.62	0	0.08	0	0.11	0.21	0	0.39	0	0	0.06	0	0
24	4.11	1.34	0.4	0.04	0.21	0.06	0	0	0	0	0	0	0	0	0	0	0.44	0.19	0.12	0.17	0.04	0.06	6.38	10.21	0.05	0.02	0.23	0	0	0.21	0	0	0	0.11	0.29	0	0.19	0	0	1.53	0.17	0.16
8	0	0	0	0	0	0	0	0	0	0	0	0	93.97	1.38	0	0	0	0	0	0	0	0.01	0	0	0	0	0	0	0	0	0	0	0	0	0	0	0	0	0	0	0	0
9	0	0	0	0	0	0	0	0	0	0	0	0	1.13	98.56	0	0	0	0	0	0	0	0.01	0	0.01	0	0	0	0	0	0	0	0	0	0.11	0	0	0	0	0	0.06	0	0
12	0	0	0	0	0	0	0	0	0	0	0	0	0	0	0.02	0	0.09	0.08	22.36	17.46	0.05	0.09	0.02	0.14	0	0	0.05	0	0	0	0	0	0	0	0	0	0	0	0	2.49	0.14	0.16
13	0.05	0	0.27	0.04	0.36	0.04	94.4	26.93	2.28	3.81	91.34	94.28	0	0	0	0	0.02	0.03	0	0	0	0	0	0	0	0	0	0	0	0	0	0	0	0	0	0	0	0	0	0	0	0.04
34	0	0	0	0	0	0	0	0	0	0	0	0	0	0.02	0	0.01	0.07	0.03	0	0	0.02	0.18	4.31	2.62	0.05	0	0	0	0.46	0	0	0	0	0	0	0	0	0	0	0.45	0	0.08
39	0	0	0	0	0	0	0	0	0	0	0	0	0.02	0	0	0	0	0	0.01	0.06	0	0	0	0.01	0	0.02	0	35.43	0	2.89	0	0.38	0	0.11	14.45	0	0	0.13	0	0	0	0
41	0	0	0	0	0	0	0	0	0	0	0	0	4.81	0.02	0	0	0	0	0.01	0	0.02	0	0	0	0	0	0	0	0	0	0	0	0	0	0	0	0	0	0	0	0	0
6	0.05	0	0.07	0	0.07	0	0	0	0	0	0	0	0	0	0.02	0	0	0	0.03	0	0	0.01	0.02	0.01	0.37	98.43	0.05	0	0	0	0	0	0	0	0	0	0	0	0	0	0	0.04
25	0	0	0	0	0	0	3.21	12.32	95.84	94.98	5.86	3.95	0	0	0	0	0	0	0	0	0	0	0	0	0	0	0	0	0	0	0	0	0	0	0	0	0	0	0	0	0	0
4	0	0	0	0	0	0	0	0	0.1	0	0	0	0	0	0.84	91.15	0	0	0	0	0	0	0	0	0	0	0	0	0	0	0	0	0	0	0	0	0	0	0	0	0	0
5	0	0	0	0	0	0	0	0	0	0	0	0	0	0	98.79	0.63	0	0	0	0	0	0	0	0	0	0	0	0	0	0	0	0	0	0	0	0	0	0	0	0	0	0
20	0	0	0	0	0	0	0	0	0	0	0	0	0	0	0	0	0.02	0.11	0.01	0	0	0.03	0.01	0	0.11	0	97.73	0	0	0	0	0	0	0	0	0	0	0	0	0.34	0	0.16
10	0	0	0	0	0	0	0	0	0	0	0.13	0	0	0	0.02	0	96.75	0.69	0	0	0	0	0	0	0	0.02	0.09	0	0	0	0	0	0	0	0	0	0	0	0	0	0	0.04
11	0	0	0	0	0	0	0	0	0.1	0	0	0	0	0	0	0.03	1.65	97.76	0	0	0	0	0	0	0	0	0	0	0	0	0	0	0	0	0	0	0	0	0	0	0	0
18	0	0	0	0	1.35	0	0	0	0	0	0	0	0	0	0	0	0.21	0.44	1.75	0.34	0	0.19	0	0.01	0.05	0.02	0.09	0	0	0.21	0	0	0	0	0	0	0	0	0	49.6	12.29	24.86
22	0	0	0	0	0	0	0	0	0	0	0	0	0	0	0	0	0.07	0.06	0.01	0	0.01	0	0	0	98.73	1.19	0.05	0	0	0	0	0	0	0	0	0	0	0	0	0	0	0
23	0	0.24	0	0.04	0	0.01	0	0	0	0	0	0	0	0	0	0	0	0	0.01	0	0	0	0	0	0	0	0	6.53	0	5.99	93.95	0.3	1.71	0.21	2.65	21.61	15.2	3.39	4.92	0	0.05	0
35	0	0	0	0	0.07	0	0	0.29	0	0	0	0	0	0	0	0	0	0	8.52	0.84	0	0	0	0	0.05	0.02	0	0	0	0	0	0	0	0	0	0	0	0	0	0	0.14	0
37	0.29	1.22	0.4	0.54	32.29	0.09	0.28	8.31	0	0	2.55	0.07	0	0	0	0	0.05	0.03	0.03	0.03	0.01	0	0	0	0	0.02	0	0	0	0	0	0.08	0.57	0	0.07	0	0	0	0	0.06	0.02	0.08
36	0	0	0	0	0	0	0	0	0	0	0	0	0	0	0.32	8.14	0.02	0	0	0.01	0	0	0	0	0.05	0	0	0	0	0	0	0	0	0	0	0	0	0	0	0	0	0
40	0	0	0	0	0	0	0	0	0.2	0	0	0	0	0	0	0	0	0.03	0	0	0	0	0	0	0	0	0	0	0.46	0	0.15	0	88.03	0	0	0	0	0	0	0	0	0
16	0	0.73	1.13	0.04	0.07	0.01	0	1.72	0	0	0	0.07	0.03	0	0	0	0.05	0.17	1.2	0.1	0.23	0.14	0.01	0	0	0	0.32	0	0	0.21	0	0	0	0	0	2.26	4.87	0.65	2.07	12.5	30.65	15.6
28	1.45	27.65	42.94	4.99	4.06	4.09	1.29	20.92	1.19	0.69	0.13	0.14	0	0	0	0	0	0	0.44	0	0.01	0.04	0.03	0	0	0	0	0	0	0	0.07	0	0	0.11	0	0.23	0	0.26	1.04	0	0.15	0.04
15	0	6.82	0	0	0	0	0	4.58	0	0	0	0	0	0	0	0	0	0	0	0	0	0	0	0.01	0	0	0	0	0	0	0	0	0	0	0	0.08	0.19	0.26	2.59	3.05	42.82	4.57
38	0	1.71	0	0	0	0.01	0	0	0	0	0	0	0	0	0	0	0	0.06	0	0	0	0	0.01	0	0	0.02	0	0	0	0	0	0	0	0	0	0	2.53	0	1.94	13.97	1.52	0.31
29	5.76	1.83	2.13	2.17	2.07	0.43	0	3.15	0	0	0	0.07	0	0	0	0.01	0.14	0.03	0.32	0.14	0.05	0.01	0.02	0.1	0	0.02	0	0.75	0.46	0.83	0	0.15	0.28	1.18	0.29	1.87	0.78	2.74	0.91	8.65	1.89	20.37
31	0.05	3.9	0	0	0	0	0	0.57	0	0	0	0	0	0	0	0	0	0	0	0	0	0	0.01	0.01	0	0	0	0	0	0	0	0	0	0	0	3.28	9.75	0	0.91	4.69	8.01	13.72
32	0.05	0	0	0.04	0	0	0	0	0	0	0	0	0	0	0	0	0	0	0	0.05	0	0	0	0.01	0	0	0	10.05	9.22	10.33	2.65	0.08	0.85	1.18	5.51	11.31	26.32	27.28	40.67	0.06	0.02	0.04
14	0.82	2.19	3.33	3.58	1.5	2.29	0.18	1.72	0	0.35	0	0.99	0	0	0	0	0.05	0	0.09	0.5	0.41	0.03	0	0.1	0	0	0	41.96	26.73	36.36	3.1	9.47	7.98	2.14	17.6	58.11	35.87	61.23	42.36	0.11	0.65	0.9
26	19.46	19.24	6.39	2.17	7.84	1.59	0.09	13.75	0.2	0	0	0.07	0	0.02	0	0	0.09	0.06	0.26	0.58	0.55	0.03	0.01	0.25	0	0	0.05	1.51	1.38	1.45	0	0	0.28	0	0.21	0.94	0.39	0.13	0.13	0.23	0.88	16.93
