# Supplementary material for: Pediatric acute myeloid leukemia tumor composition predicts patient outcomes at diagnosis and reveals mechanisms of resistance to chemotherapy
Source: Research Square preprint supplement (doi:10.21203/rs.3.rs-4669225/v1), 2026-01-23
Supplement: Supplementary file 3 [file 2cab4e3f8e4f9fb55cda9569.xlsx]

## Sheet: Sheet1
Up signature	LSC47	FLT3 coexpression	CDK6 coexpression	ILK coexpression	RIPK2 coexpression	IKBKE coexpression	KIT coexpression	HSC	OXPHOS	MYC
ITM2C	CD34	COL24A1	COL24A1	HEXIM2	RSAD2	UNC13D	ANHX	AVP	ABCB7	ABCE1
PEBP1	EMP1	RUNX1	RUNX1	EGF	ACOD1	GIMAP1-GIMAP5	PHYKPL	CRHBP	ACAA1	ACP1
HHEX	MMRN1	MED13L	NUP210	APCDD1L	PCDHGA10	SP110	KRT89P	HOPX	ACAA2	AIMP2
SARAF	CPXM1	TEC	LNPEP	ACTN1	TEC	MX2	FRG1GP	SPINK2	ACADM	AP3S1
CAT	DNMT38	ORAI3	MYO7B	C12ORF75	NEURL3	RUNX3	HMGB1P19	NRIP1	ACADSB	APEX1
CDK6	NYNRIN	RNF220	MED13L	MYL6	LAP3	EML3	PNLDC1	ANKRD28	ACADVL	BUB3
EGFL7	SOCS2	HOXA9	TEC	RUFY1	NINJ1	CD5	CLNS1A	CYTL1	ACAT1	C1QBP
HSD17B11	LAPTM4B	NFE2	PM20D2	RRM2P3	ADPRH	NECAP2	TNFSF4	C6orf48	ACO2	CAD
LPCAT2	ZBTB46	NCKAP1L	RFX7	SDPR	CPVL	CD4	TBPL2	IDS	AFG3L2	CANX
RBM3	SMIM24	TESMIN	CTD-2116N17.1	LGALS12	SKAP2	CD7	AL590762.7	EGFL7	AIFM1	CBX3
SEPTIN6	CDK6	C1ORF186	GLOD5	CAPN11	ATF3	NINJ1	CGGBP1	MDK	ALAS1	CCNA2
TMEM14C	DPYSL3	CBFA2T3	ZC3H11A	MXRA8	SAMD9	CD6	KHDC3L	ZFAS1	ALDH6A1	CCT2
ARPC1B	GPR56	FLI1	TNFSF4	MYL9	C3AR1	CORO7	PLEKHB2	CD164	ATP1B1	CCT3
ICAM3	KIAA0125	GAPT	ORAI3	TLN1	NOD2	CCM2	GORAB	LAPTM4B	ATP5F1A	CCT4
IL18	NGFRAP1	CERKL	CEP83	C2ORF88	STX11	RIN3	CPNE7	MLLT3	ATP5F1B	CCT5
MPG	AKR1C3	RPL5	RNF220	IFITM3	PNP	PFN1	SPG7	SNHG7	ATP5F1C	CCT7
RNF125	ARHGAP22	RPL3	ALG10B	CPNE5	CD2AP	AP5Z1	TPTE	TSC22D1	ATP5F1D	CDC20
RPN2	HOXA5	GFI1	LEF1	TAGLN	OR51K1P	STXBP2	GTF2IP4	MSI2	ATP5F1E	CDC45
CD99	SPINK2	IKZF1	RB1	STXBP2	LACTB	C3AR1	HERC5	SNHG8	ATP5MC1	CDK2
ERH	FAM69B	TMEM173	CGGBP1	XXBAC-BPG32J3.20	NIPAL4	TRANK1	RP5-1163L11.2	CD34	ATP5MC2	CDK4
MSRB3	HOXA6	ADA	HNRNPU	CTD-3214H19.16	SLAMF7	NOD2	MYB	NPR3	ATP5MC3	CLNS1A
PDIA6	HOXA9	ARHGEF6	TESK2	ACTB	GBP1	IL2RG	HENMT1	MEG3	ATP5ME	CNBP
RAB37	MAMDC2	IQGAP2	GABPB1	ASNA1	GBP2	ADCY7	MVB12B	MSRB3	ATP5MF	COPS5
SH3BGRL	AIF1L	SLC22A16	SRP72	FO538757.2	EPSTI1	IL27RA	ADAD1	PRDX1	ATP5MG	COX5A
ATF7IP2	ANGPT1	CNTRL	HOXA9	SMPD4P1	ZNF267	PSMB10	CALN1	EBPL	ATP5PB	CSTF2
CALHM6	PRSS57	EMB	CHST11	PIP4K2A	ATG3	STX11	CER1	AKR1C3	ATP5PD	CTPS1
DDAH2	SHANK3	CD38	E2F2	AP2S1	HLA-DRB7	C10ORF54	KLF11	HEMGN	ATP5PF	CUL1
DDOST	TNFRSF4	CD34	NFE2	PXDC1	EDEM2	CHST11	NFE2	HTR1F	ATP5PO	CYC1
HDAC1	AGER	MBNL1	AC006116.27	S100A16	PLK3	SLAMF8	CLUL1	EPB41L4A-AS1	ATP6AP1	DDX18
MGST3	ATP8B4	SERPINB1	NCKAP1L	FAM63A	TNFSF13	STAT6	ALG8	HSP90AB1	ATP6V0B	DDX21
SCCPDH	EPDR1	IGLL1	TESMIN	LY6G6F	KLF10	B2M	TESMIN		ATP6V0C	DEK
SERPINB1	FSCN1	AGPS	ERLIN1	TMEM50A	EAF2	GBP2	TUBB8P8		ATP6V0E1	DHX15
SYPL1	GATA2	MSRB3	C1ORF186	RP11-578F21.9	CH17-264B6.4	APOL3	SH2D1B		ATP6V1C1	DUT
BIN2	GPSM1	KIAA0125P2	BAZ1B	SPDYC	COQ10B	IL17RA	PARP16		ATP6V1D	EEF1B2
CD37	H2AFY2	NUCB2	CBFA2T3	PPBP	EHD1	PRKCH	SETMAR		ATP6V1E1	EIF1AX
CD47	KCNK17	KIAA0125P1	FLI1	RAB27B	FCHSD2	GSTK1	RP11-255H23.5		ATP6V1F	EIF2S1
ENO1	MYCN	ESYT2	WAPL	EHD2	FOSL2	PRKCD	INTS8		ATP6V1G1	EIF2S2
GTF3A	SKIDA1	STAG3L3	HCFC1	EHD3	RNF144B	NCKAP1L	AL592183.1		ATP6V1H	EIF3B
LAMTOR1	SPNS2	PTGER2	THAP12	MYL12A	RPS3AP39	FAM78A	LXN		BAX	EIF3D
OSTC	VWF	RCSD1	PTP4A2	SCGB1C1	PARP12	EDEM2	RPL5		BCKDHA	EIF3J
SRP9	COL24A1	PRSS21	FAM111A	EIF6	VAMP8	TNFSF13	RPL3		BDH2	EIF4A1
STMN1	FAM212A	LAIR1	NOL10	SCGB1C2	PLSCR1	TRAV13-1	DCAF4L2		CASP7	EIF4E
TIMP2	FLT3	LMO2	GAPT	TAGLN2	GPR183	TALDO1	SLC45A2		COX10	EIF4G2
TMED3	GCSAML	CD164	CERKL	SFXN3	BTK	HLA-A	DCAF4L1		COX11	EIF4H
TPM4	GUCY1A3	C3ORF80	RPL5	FERMT3	HLA-DRB4	HLA-B	TUBBP5		COX15	EPRS1
TXNIP	TFP1	SPINK2	RPL3	E2F6P4	HLA-DRB1	HLA-E	CDCA7		COX17	ERH
AIF1	BIVM	ANKRD28	PRR22	TP53TG3D	LST1	EHD1	TXK		COX4I1	ETF1
ASAH1		RPS6	RPL4	CETP	MS4A7	VASP	TXNDC12		COX5A	EXOSC7
CD52		SPNS3	HACD1	RNH1	IL1RN	CCDC88B	ELK3		COX5B	FAM120A
CMTM7		GOLGA8N	ANP32B	SPARC	CETP	PARP12	AARD		COX6A1	FBL
COMMD7		RPL9P9	ANP32A	UXS1	IFI35	VAMP8	SMC3		COX6B1	G3BP1
EID1		TARBP1	ABHD17AP4	PTTG1IP	HIF1A	PARP10	RP11-757H14.2		COX6C	GLO1
EMC7		PRSS57	ABHD17AP5	ELK3	SAMSN1	PSME2	RNF215		COX7A2	GNL3
FAM30A		MFNG	GFI1	MYLK	ICAM1	TAGLN2	TRPM1		COX7A2L	GOT2
FKBP1A		GOLGA8J	CDCA7	SLA2	RP11-85G20.1	BTK	OBP2B		COX7B	GSPT1
HACD4		MAPKAPK3	IKZF1	CYB5R3	ZC3H12A	GRB2	SOX17		COX7C	H2AZ1
MOB4		ELMO1	PRKDC	GNG11	RP11-548N1.1	FERMT3	MKRNP2		COX8A	HDAC2
NDUFC2		EMID1	IKZF2	LGALS1	FTH1	LST1	TNFSF11		CPT1A	HDDC2
PDLIM1		FAM117A	CD1E	PRKAR2B	KCNN4	CDC42SE1	PRKACB		CS	HDGF
PHB2		TSPAN32	SMC4	ARL6IP5	LGALS9	SPI1	PROM1		CYB5A	HNRNPA1
PLP2		ZFP36L2	GATA2	HIST1H3H	IER3	PPP1R18	TPSAB1		CYB5R3	HNRNPA2B1
RALA		HOXA10	SMC5	SERPINH1	C19ORF38	RNPEPL1	TERF1P2		CYC1	HNRNPA3
S100A4		C1ORF228	ELK3	TSPAN4	DUSP5	ICAM3	LYPLA1		CYCS	HNRNPC
SELENOF		CCND3	UBE2J1	CTSA	LYN	IKZF1	CCDC117		DECR1	HNRNPD
TM7SF3		IL12RB2	CD1B	RHOA	CCR1	TRAV23DV6	NCOA7		DLAT	HNRNPR
TMEM123		CPA3	TMPO	ANXA2	WARS	IFI30	CARD9		DLD	HNRNPU
TMEM173		LRRC75A	SYNCRIP	TNFRSF12A	ANXA1	TRPM2	FCRL4		DLST	HPRT1
TMEM59		ATP8B4	RPS2P28	ANXA5	IL10	INPP5D	VWA5A		ECH1	HSP90AB1
TMX1		GTF3A	RAVER1	SLC10A3	H3F3B	GPR174	NCR2		ECHS1	HSPD1
TUFM		SCCPDH	TESPA1	FUCA2	IL10RA	RASSF5	NCR3		ECI1	HSPE1
TWF2		ERG	ZBED3	NCOA4	SPHK1	FAM65B	RAP2B		ETFA	IARS1
VKORC1		CBFB	MCMBP	UBL4A	AC090453.1	CD14	FAM222B		ETFB	IFRD1
ANXA7		AK2	ZNF800	TMEM40	NMI	JUNB	HEATR5B		ETFDH	ILF2
BID		TMEM220	RAD1P1	VEGFC	TFEC	LGALS9	TAL1		FDX1	IMPDH2
CDC42SE2		CYTL1	ZNF367	EMP3	LILRB2	CCR1	PQLC3		FH	KARS1
EIF2AK2		IGHJ2P	STAT5A	NUTF2	AMPD3	GSDMD	EXOC3		FXN	KPNA2
EIF3L		EGFL7	ATP6V0A2	GP6	IL18	LRRC25	OR3A2		GLUD1	KPNB1
GTF2A2		ITGA4	ZBED4	GP9	LILRB4	C11ORF21	C5ORF47		GOT2	LDHA
HMGN3		RPS3A	PHF10	RHOC	LYZ	IL16	ATF7IP2		GPI	LSM2
IARS2		SEPT6	TMEM173	PDZK1IP1	RPL7P33	RIPK3	MTCYBP22		GPX4	LSM7
JAK1		ETV6	WDR36	DERA	RPL7P32	IL10RA	AL109927.1		GRPEL1	MAD2L1
LMAN1		IGHJ3	LRPPRC	NCBP2L	PTPRE	TSC22D3	SHE		HADHA	MCM2
LYPLA1		ITGA9	PABPC1	CALU	IL1A	LILRB2	SNX5		HADHB	MCM4
MT-ATP8		DOCK2	EXOC6	MYZAP	TLR2	EMP3	SOCS4		HCCS	MCM5
PARP1		TTC24	ADA	TAX1BP3	MS4A4A	TMC8	SYCE1		HSD17B10	MCM6
PRDX1		CELF2	ARHGEF6	LIMS1	IL1B	RHOG	SLC22A16		HSPA9	MCM7
PRDX3		UBA7	TOP2B	PIGH	BST2	BTN3A3	RAP1B		HTRA2	MRPL23
RGS10		NPR3	URI1	TLR5	BST1	TYK2	MIS18BP1		IDH1	MRPL9
SLC25A6		CMAHP	DHX9	MGLL	SIGLEC1	TMC6	TRIM6		IDH2	MRPS18B
SPINT2		SPN	DENND1B	GAS6	MMP19	GMIP	MYCT1		IDH3A	MYC
STARD3NL		P2RY8	IQGAP2	RP11-544M22.13	PQLC3	VAV1	STAP1		IDH3B	NAP1L1
TAGLN2		DUSP10	BMI1	LIMS3	ARHGEF6	C17ORF62	ST8SIA6		IDH3G	NCBP1
TALDO1		NRIP1	MTDH	ARF1	CSRNP1	TLR2	RNF152		IMMT	NCBP2
TUBB		CPXM1	TRBV6-6	ABHD4	IGSF6	LAT2	CD34		ISCA1	NDUFAB1
TYROBP		DCK	MED12	FAXDC2	DAZAP2	APBB1IP	PCMTD2		ISCU	NHP2
UROS		CAT	SOCS4	ARPC1B	CD40	PTPRC	ZNF586		LDHA	NME1
AGPAT2		ABHD17B	SLC22A16	ZC3HAV1	GRAMD1A	THEMIS2	CCT4		LDHB	NOLC1
AKR1A1		P2RX1	RAP1B	TWF2	CTSZ	RAPGEF1	CBR3		LRPPRC	NOP16
ANXA11		TPT1	CNTRL	OAZ1	AREG	SIGLEC9	NANOS3		MAOB	NOP56
ATP5PB		NRROS	EMB	PEAR1	CTSS	CH507-9B2.1	CCT2		MDH1	NPM1
C1QBP		GNA15	ST8SIA6	LRRC32	SOCS3	DENND1C	SERPINB1		MDH2	ODC1
C4orf3		LYL1	CD38	RRAS	SNX2	ARHGEF1	COL23A1		MFN2	ORC2
CACYBP		HHEX	ZNF107	PRKCDBP	CTSO	ARPC1B	DMRT1		MGST3	PA2G4
CD33		MAT2A	L3HYPDH	SH3BGRL2	RAP1B	CTSZ	HNRNPA3P13		MPC1	PABPC1
CDK2AP1		ARHGDIB	CEP55	SH3BGRL3	CD38	TWF2	RPA1		MRPL11	PABPC4
CNIH1		CACNA2D4	CD34	RSU1	FCER1G	RASAL3	NUDT21		MRPL15	PCBP1
CNST		MFSD10	GABPA	CLIC1	CCR5	OAZ1	TRGVB		MRPL34	PCNA
COMT		RUNX2	MBNL1	PF4V1	CD33	LIMD2	APEX1		MRPL35	PGK1
COX6C		RFX8	RANBP2	ELOVL1	SERPINB2	CD3E	ACTBP6		MRPS11	PHB1
CPXM1		ARMC5	SUZ12	MMD	GCH1	CTSS	KIAA0125P2		MRPS12	PHB2
CRIP1		DUS3L	SLF2	ATP6V0E1	IFNGR2	SBNO2	NUCB2		MRPS15	POLD2
CTSA		SATB1	RP11-420K10.1	BCAP31	SERPINB1	FCER1G	KIAA0125P1		MRPS22	POLE3
CTSW		MYB	SERPINB1	GSTO1	G0S2	CCR5	B3GNT2		MRPS30	PPIA
DNAJC1		CHST13	RRP1B	ELOVL7	GSTO1	CD53	FYTTD1		MTRF1	PPM1G
DNAJC8		NIPAL2	NOC3L	RPA1	CREG1	TRBV24-1	IL22		MTRR	PRDX3
DTD1		VPREB1	ZNF33B	SLC39A13	LAPTM5	DBNL	GPHA2		MTX2	PRDX4
DYNLL1		HOXA7	KIT	GP1BA	RNASE6	SYK	ZNF571		NDUFA1	PRPF31
EIF3E		TNFSF13	IGLL1	PGRMC1	SERPINB8	NR1H2	RPLP0		NDUFA2	PRPS2
ETV6		EAF2	AGPS	MLH3	MS4A6A	LAPTM5	TPSD1		NDUFA3	PSMA1
FIBP		FCHSD2	APEX1	ANO6	RILPL2	CNPY3	FAM69B		NDUFA4	PSMA2
FSCN1		VAMP8	MSRB3	TPST2	KIAA0125P2	SLC8B1	UNG		NDUFA5	PSMA4
GSN		FTCDNL1	KIAA0125P2	FKBP1A	PELI1	MYO9B	PHKA1P1		NDUFA6	PSMA6
HLA-C		BTK	NUCB2	AGBL5	HLA-DPB1	HCK	XPO1		NDUFA7	PSMA7
ITM2B		RGL4	KIAA0125P1	CFAP161	KIAA0125P1	CTB-133G6.1	RNF138		NDUFA8	PSMB2
LUZP1		CD302	ESYT2	CTTN	HBEGF	SHKBP1	RP11-561N12.5		NDUFA9	PSMB3
MIER1		HLA-DRB4	STAG3L3	RP3-370M22.8	GRN	HCLS1	SCML2		NDUFAB1	PSMC4
MZT2A		AOX2P	RPLP0	PLP2	IL27	PLEKHO2	ACADM		NDUFB1	PSMC6
NCK1		HLA-DRB1	PTGER2	NUCB1	SNRPEP2	CD48	XPO5		NDUFB2	PSMD1
PSME1		LST1	DSCC1	LAMTOR1	HEXB	PLCB2	ASH2L		NDUFB3	PSMD14
PTPRC		GMFG	HEATR1	PLIN3	LPCAT2	SIPA1	MYL6P1		NDUFB4	PSMD3
SORL1		ITSN2	LPCAT2	VN1R110P	N4BP2L1	RP11-1094M14.8	VN1R87P		NDUFB5	PSMD7
TBXAS1		HACD4	MKI67	SRPX	CAPG	SELPLG	GIT2		NDUFB6	PSMD8
TM9SF2		TRPM2	CLINT1	TGFB1I1	AIF1	GRN	LMO2		NDUFB7	PTGES3
TMBIM4		INPP5D	TRBV12-3	F13A1	SNX10	TRAF3IP3	GUCY1A3		NDUFB8	PWP1
TMED2		RASSF1	RCSD1	FSTL1	PTGS2	FKBP15	ANKRD27		NDUFC1	RACK1
TMEM14B		PLAC8	PHKA1P1	TMEM140	IFIH1	PTAFR	CD164		NDUFC2	RAD23B
TPI1		RP11-69L16.5	PRSS21	PRSS23	GPR132	OGFR	C3ORF80		NDUFS1	RAN
TRAM1		LGALS9	FGFR1OP2	PTGS1	RP11-477E3.2	WAS	SPINK2		NDUFS2	RANBP1
TRMT112		TSPAN2	RPSAP12	TRBV7-5	HLA-DPA1	AOAH	PTCD3		NDUFS3	RFC4
TSTD1		PROM1	ZNF207	CST4	RP11-771F20.1	CAPG	ANKRD28		NDUFS4	RNPS1
		C11ORF21	NFYA	CST2	BID	AIF1	RPS6		NDUFS6	RPL14
		CARD9	SRSF10	GSTA6P	HLA-DMA	RCSD1	SPNS3		NDUFS7	RPL18
		TSC22D3	SETD2	MIR1199	LAIR1	GNAI2	GOLGA8N		NDUFS8	RPL22
		TFEC	LAIR1	IKBKG	CSGALNACT2	PRAM1	MSH2		NDUFV1	RPL34
		DNTT	LMO2	TPM4	CD74	PSMB8	RPL9P9		NDUFV2	RPL6
		LYZ	CD164	GPR55	ANKRD28	RAC2	BSPRY		NNT	RPLP0
		VAV3	C3ORF80	UBE2F	GK	JAK3	RP11-286H14.4		NQO2	RPS10
		CEACAM4	RP11-335E14.1	ENKUR	SLC31A2	MGAT1	PRSS57		OAT	RPS2
		LAT2	SPINK2	MOB3C	OSM	TBC1D10C	GOLGA8Q		OGDH	RPS3
		APBB1IP	ANKRD28	TUBA4A	TYROBP	LAIR1	RBMXL2		OPA1	RPS5
		FAM101B	DIMT1	TUBA8	TICAM1	TGFB1	BFSP2		OXA1L	RPS6
		HLA-DQB1	RPS6	RAB34	OSCAR	SEMA4A	RP11-126O22.1		PDHA1	RRM1
		MZB1	SPNS3	XK	ZNFX1	CD300A	AC007389.1		PDHB	RRP9
		CSRNP1	GOLGA8N	RAB31	RP11-507K12.1	DENND4B	ELMO1		PDHX	RSL1D1
		RPS3AP5	RPL9P9	GFI1B	CLEC4E	TAP2	CD69		PDK4	RUVBL2
		AREG	TARBP1	SPOCD1	CNOT8	TAP1	EMID1		PDP1	SERBP1
		TIFAB	PRSS57	RAB32	CD300E	TRPV2	NSMAF		PHB2	SET
		SH3BGRL	EEF1A1	PLOD1	PPIF	TYROBP	SPESP1		PHYH	SF3A1
		SOCS2	SLFN11	RAB37	CD68	ARHGAP27	HDGFL1		PMPCA	SF3B3
		MIS18BP1	CNOT1	C6ORF25	ARL8B	MOB3A	TPSB2		POLR2F	SLC25A3
		RIPK2	AC007389.1	UBXN11	CD86	AP5B1	SLA		POR	SMARCC1
		CTSG	MFNG	ZYX	CD83	ARHGAP25	RGS16		PRDX3	SNRPA
		CD33	SYPL1	ADAM9	CD80	DEF6	FAM47C		RETSAT	SNRPA1
		P2RY14	POLE3	S100A4	AHR	OSCAR	FAM117A		RHOT1	SNRPB2
		CD53	GOLGA8J	MYADM	TNF	DOK3	C6ORF10		RHOT2	SNRPD1
		MEF2D	MAPKAPK3	PF4	METRNL	ARHGAP30	CREBL2		SDHA	SNRPD2
		SYK	ELMO1	PPIC	RELB	RAB37	RP13-492C18.2		SDHB	SNRPD3
		RNASE6	PTPN7	RGS18	CXCL16	EHBP1L1	MPO		SDHC	SNRPG
		CNPY3	KRT8P47	RAB1B	TMEM123	ZYX	PSORS1C2		SDHD	SRM
		TTC7A	MPHOSPH9	ITGA2B	PYCARD	PTPN7	TSPAN32		SLC25A11	SRPK1
		SERPINB8	EMID1	TUBB1	RAB20	ADAM8	ZFP36L2		SLC25A12	SRSF1
		RNASE2	NSMAF	PRUNE1	CYSLTR2	LRCH4	TMEM123		SLC25A20	SRSF2
		RILPL2	PCNA	LOXL1	RNF19B	PTPN6	LDHAL6EP		SLC25A3	SRSF3
		HLA-DPB1	PLEKHA3P1	TSPAN33	ZNF85	CD68	BNIP3P17		SLC25A4	SRSF7
		ANKRD13D	SLC25A40	LOXL2	NBN	RGS19	C1ORF228		SLC25A5	SSB
		STAG3L2	SRSF1	LMNA	CCRL2	TYMP	TMEM245		SLC25A6	SSBP1
		CLEC9A	SRSF2	NT5E	NLRP3	GPR68	NLRP9		SUCLA2	STARD7
		N4BP2L1	FAM117A	CCND3	FOPNL	RGS14	PDPN		SUCLG1	SYNCRIP
		AIF1	TYMS	ABLIM3	RELT	GIMAP1	CSE1L		SUPV3L1	TARDBP
		FAM212A	TSPAN32	TUBB6	SH2B3	NCF1C	GPBP1L1		SURF1	TCP1
		OR52N4	ZFP36L2	CFL1	LRRC75A	GIMAP4	MLLT10P2		TCIRG1	TFDP1
		PRAM1	TMEM123	GRAP2	ATP8B4	TRAV20	CPA3		TIMM10	TOMM70
		HLA-DMB	LDHAL6EP	AC093616.4	SLC15A3	GIMAP5	GBAP1		TIMM13	TRA2B
		ADAM28	HOXA10	CAPN2	FAM26F	ACAP1	LRRC75A		TIMM17A	TRIM28
		CXCR4	C1ORF228	PHLDA2	TRAF1	GIMAP8	ATP8B4		TIMM50	TUFM
		HLA-DPA1	SH3TC1	MAP3K5	LY86	RELB	TRAPPC8		TIMM8B	TXNL4A
		RAC2	PAK2	RP11-142C4.4	PPTC7	FGD3	TDRD9		TIMM9	TYMS
		SLC17A9	CCND3	GAS2L1	KMO	ARHGAP45	FAM175A		TOMM22	U2AF1
		HLA-DMA	USP1	HIST1H2AC	NFKB1	PYCARD	MKRN1		TOMM70	UBA2
		GIT2	RPS2	MORC1	NFKB2	SH3BP1	MAP7D2		UQCR10	UBE2E1
		GUCY1A3	GPBP1L1	RP11-142C4.5	DUSP23	COTL1	GNAQ		UQCR11	UBE2L3
		CD74	RPS3	TRAPPC1	PAN3	OSTF1	STT3B		UQCRB	USP1
		GOLGA8M	SLC39A3	AC093724.2	ISG20	SASH3	ERG		UQCRC1	VBP1
		PNRC1	IL12RB2	OST4	MYD88	SLC15A3	TDRD12		UQCRC2	VDAC1
		GS1-124K5.9	ABCF2	LSM1	RGCC	KCNAB2	TDRD10		UQCRFS1	VDAC3
		DOK3	CPA3	ARPC5	STK26	CYBB	RSRP1		UQCRH	XPO1
		RAB32	FANCI	FRMD3	TBXAS1	CYBA	DDX4		UQCRQ	XPOT
		CNOT8	ZNF782	FRMD6	ARPC2	NFKB2	CXORF67		VDAC1	XRCC6
		RAB37	OSBPL8	SELP	CARD19	MYD88	LAP3P2		VDAC2	YWHAE
		WDFY2	LRRC75A	NT5C3A	TPP1	ARPC4	SOHLH2		VDAC3	YWHAQ
		PDE7A	ATP8B4	ARPC4	FTL	TBXAS1	FAM162B
		RGS19	OSBPL3	KIF2A	GGTA1P	ARPC2	COL4A3BP
		MPG	GTF3A	ARMCX6	PFKFB3	RNF166	PIM2
		MPO	NUP153	DRAP1	FAM49B	IFNAR2	TCEANC
		DOCK11	WRNIP1	DYNLRB1	RPL7P26	IL7R	MAEL
		PYCARD	SCCPDH	ESAM	CD274	CSF1R	KLRC1
		BAHCC1	TFDP1	CDC42EP2	GPR84	AKNA	CYTL1
		BAALC	PRPF8	CARD19	SLC2A6	ARHGAP9	SSX2
		TSPOAP1	TFDP2	TPP1	SAT1	NCF2	EGFL7
		ACSS1	RFXAP	GGTA1P	ETS2	NCF4	NAA30
		MAP3K8	STT3B	DDX11L1	GLIPR2	DOCK8	SETDB2
		HMGN2	TCF7	DDX11L2	AC013444.1	CORO1A	ITGA4
		SASH3	FSCN2	CHMP6	PIM3	CSF2RB	ANGPT1
		RARRES2P2	ERG	VCL	MSC	RASGRP2	HNRNPA1P11
		FAM26F	BMP2K	KIF28P	RP11-12A2.1	ARHGAP4	PTPN12
		LY86	NOTCH1	MAX	SRGN	STK10	RPS3A
		KCNAB2	LRRC58	CD151	C1ORF162	EFHD2	2024-09-06
		CYBA	WHSC1	CABP5	CMTM6	TNFRSF4	UTF1
		ARPC2	CBFB	ARHGAP18	OSGIN2	SUN2	FES
		SELL	AK2	ARHGAP6	PILRA	CMTM6	PTP4A1P3
		TPP1	MSI2	LTBP1	NFKBIZ	MSN	CDK6
		LRRFIP1	TTF2	DAPP1	PSMC1P2	MKL1	PIKFYVE
		KCNE5	PDS5A	CORO1C	NAP1L1	PILRA	RP11-241F15.10
		SH3KBP1	TMEM220	ACRBP	TNIP1	ARAP1	RP11-1217F2.22
		DOCK8	ZKSCAN7	MAP3K7CL	ETV3	TNIP1	GCSAML
		RASGRP2	CYTL1	MYDGF	NAMPTP1	TNFRSF1B	EEF1G
		ARHGAP15	RAG2	FAM198A	NFKBIA	FES	ITGA9
		ETS2	IGHJ2P	RGS6	ELF1	OAS2	PSMG1
		ARHGAP4	EGFL7	PTRF	IL6	LCP1	CD244
		RAB44	DIS3	DDX11L16	IRF5	IRF5	TTC24
		TRGC1	ITGA4	THEM5	TNIP3	RASA3	CHMP1B2P
		C1QTNF4	ANGPT1	IGFBP7	IL3RA	PARVG	AMD1
		GLIPR1	USP24	MFAP3L	ADORA2A	BCL3	ABCB5
		AC012314.1	RPS3A	DDX11L10	PARVG	IRF9	NPR3
		AC012314.2	SEPT6	AP2M1	BCL3	MAN2B1	PMEL
		TCF3P1	ETV6	CD99	HLA-DRA	LCP2	DDX43
		AC012314.3	RBL1	PTPN18	ETF1	DOCK2	CTD-3074O7.11
		AC012314.4	IGHJ3	GPX1	LCP2	CD244	FBXO45
		AC012314.5	PIKFYVE	REXO2	MS4A3	LAT	SPN
		AC012314.6	SFPQ	RPL23AP7	NFKBIE	GPSM3	RP4-738P11.3
		GPX1	GCSAML	NAT8B	CXCL8	UBA7	CYP26B1
		SRGN	EEF1G	ITGA5	SMIM3	TRADD	TNFRSF18
		SETDB2	ITGA9	GPX4	MCTP1	PIK3R5	LBR
		C1ORF162	CDK2	CMTM5	RPL5P23	NLRC5	NAE1
		IRF2BP2	MCM6	CAV2	TNFAIP8	HK3	PHACTR1
		TRBVB	MCM7	CAV1	BCL2A1	GRK2	TRDC
		ELF1	DOCK2	WIPI1	CCL3L3	P2RY8	PRKG2
		FES	MCM2	PARVA	TNFAIP6	HRH2	S100PBP
		CDK6	MCM3	BMP6	PIK3R5	CASP8	RP11-420K14.3
		IRF5	GPSM2	BCKDK	TNFAIP3	DPP7	RP11-420K14.2
		IL3RA	TTC24	2024-03-02	HUS1B	PSTPIP1	DAPK1
		IGHJ1	SEH1L	DAP	CXCL2	GRK6	H2AFY
		PARVG	NUFIP2	DAB2	CXCL1	PPP6R1	KATNA1
		IRF8	CELF2	TMEM219	TNFAIP2	CAPZB	HAUS4
		HLA-DRA	UBA7	CATSPER1	TREM1	ADGRE5	GIP
		MS4A3	TGFBRAP1	SMIM3	CXCL3	TNFRSF18	TSN
		CD244	NPR3	SMIM5	ADGRE2	EMILIN2	TBC1D1
		SMIM3	LMNB1	DDX11L9	DUSP10	LPXN	SNTB1
		RNPC3	HMGB1	SNAP23	DRAM1	CASP1	CAT
		CTD-3092A11.1	CMAHP	FAM114A1	PSTPIP2	CYTIP	EIF3L
		PLD4	METTL13	ALOX12	IRAK2	TNFRSF14	REST
		FUT4	ADAMTS17	AGPAT1	IRAK3	ERAP1	TBC1D7
		FUT7	SPN	PDLIM1	CASP4	PVRIG	P2RX1
		GRK2	P2RY8	SCFD2	MFSD1	RNASET2	LNX2
		DPP7	DUSP10	CA2	PDE4B	ANXA11	CCDC171
		RP11-488L18.4	NRIP1	RP11-1180F24.1	EMILIN2	FGR	MATR3
		IRAK3	PPP6R1	CAPZB	CASP1	MYO1F	RBM46
		TOP1MT	TOPBP1	MFSD1	WASF2	ZAP70	TAF5
		MFSD1	HIST1H1E	PDLIM7	MCL1	LCK	EIF3E
		CASP2	CPXM1	TRIM40	METTL18	CTDSP1	CBLL1
		BLNK	C21ORF91	PTCRA	IL15RA	FMNL1	TPT1
		RREB1	HIST1H1D	SMOX	WTAP	TRIM38	B4GALT6
		H1FX	LOC440461	ZNF185	HAUS4	MYO1G	CDCA7L
		CIITA	H2AFY	PPBPP2	PLAUR	ITGB2	PIWIL2
		AOX3P	DCK	DAPK3	DYTN	NRROS	SLC24A5
		CPT1A	ZFP91	TAF10	SOD2	TRABD	LUZP4
		CLEC11A	SNTB1	CXCR2P1	CLEC2B	UNC93B1	TYRP1
		RP11-632K20.7	CAT	PTCHD3P1	KLF6	WIPF1	FLT3
		RP11-382B18.5	ABHD17B	TM6SF1	CAT	LSP1	RNF17
		CLEC2B	P2RX1	CTDSPL	PIK3AP1	PPM1M	AC006033.22
		HSH2D	ANAPC1	MYO1C	EIF3E	MVP	ZBTB44
		KLF6	EIF3E	PTP4A2P2	MYO1G	TCIRG1	FRG1FP
		MYO15B	TPT1	DAD1	NRROS	ATP2A3	RPL10A
		UMODL1	B4GALT6	RGS10	CEBPB	PIK3CD	KRT86
		PIK3AP1	LUZP6	LEPROT	RBM27	ARRB2	TNFSF13B
		MYO1G	NRROS	TMEM55A	FLT3	SQRDL	GNA15
		SMIM24	RBM26	ITGB1	ADPGK	ITGAL	RPS4X
		TRABD	FLT3	WHAMMP2	PLEK	SAMHD1	LYL1
		LTK	AGGF1P2	WDR1	CLEC12A	2024-09-09	RBM3
		PIWIL4	GNA15	ITGB5	SQRDL	CYTH4	HHEX
		LSP1	RPS4X	ITGB3	HSD17B11	RPS6KA1	NARS2
		ADPGK	LYL1	AQP10	OASL	ARHGDIB	ARRB1
		SOWAHD	RBM3	ETFA	GNA15	TAGAP	RP11-79D8.2
		UHRF1	HHEX	TREML3P	HLX	PSD4	RP11-428P16.2
		CXORF21	POLR2B	CLEC1B	CCL8	PTK2B	BEND4
		RPL10A	MAT2A	VSIG2	ARHGDIB	ITGAX	VSTM1
		HSD17B11	ARHGDIB	ABHD16A	DHX58	CSK	VPS36
		PIK3CG	TRA2B	POLR2E	GNA13	TRIM21	HORMAD1
		PTK2B	HNRNPA1	BEND2	TRIM25	CYTH1	PIWIL1
