# Supplementary material for: Pediatric acute myeloid leukemia tumor composition predicts patient outcomes at diagnosis and reveals mechanisms of resistance to chemotherapy
Source: Research Square preprint supplement (doi:10.21203/rs.3.rs-4669225/v1), 2026-01-23
Supplement: Supplementary file 4 [file 3e29f0dbf75d5f72ed4b5bff.xlsx]

## Sheet: Table-prop-PAVTLN-res2 5-2023-0
	0	1	2	3	4	5	6	7	8	9	10	11	12	13	14	15	16	17	18	19	20	21	22	23	24	25	26	27	28	29	30	31	32	33	34	35	36	37	38	39	40	41	42	43	44	45	46
PAVTLN.d	0	61	0	0	0	0	0	0	0	0	0	0	0	0	0	0	0	0	0	0	0	0	0	0	9	0	0	1	0	0	14	0	0	0	0	0	0	0	10	0	0	0	0	5	0	0	0
PAVTLN.r	0	0	0	0	0	12	12	10	8	10	0	9	0	9	9	0	8	0	0	8	0	0	2	0	0	2	0	0	0	0	0	0	0	0	0	1	0	0	0	0	0	0	0	0	0	0	0
TCHnorm1.n	0	0	1	2	6	0	0	0	3	0	1	1	2	0	0	5	0	10	0	0	0	0	5	16	2	3	0	6	1	9	0	0	10	2	1	4	1	1	0	1	1	3	1	1	0	0	0
TCHnorm2.n.S	28	0	16	0	6	0	0	0	1	0	7	0	7	0	0	0	0	3	6	0	6	1	0	0	0	0	0	2	0	1	0	0	0	1	3	1	3	3	0	3	1	1	0	0	0	0	1
TCHnorm2.n.U	0	0	0	25	5	0	0	0	0	0	1	0	1	0	0	9	0	0	1	0	1	9	4	0	4	4	8	1	7	0	0	6	0	3	0	1	0	0	0	0	1	0	2	0	2	1	0

## Sheet: Table-prop-PAVBFN-res2 5-2023-0
	0	1	2	3	4	5	6	7	8	9	10	11	12	13	14	15	16	17	18	19	20	21	22	23	24	25	26	27	28	29	30	31	32	33	34	35	36	37	38	39	40	41	42	43	44
PAVBFN.d	22	1	1	2	0	15	1	0	0	1	13	12	1	0	9	9	8	4	0	0	0	0	0	0	0	0	0	0	0	0	0	0	0	0	0	0	0	0	0	0	0	0	0	0	0
PAVBFN.r	1	20	17	17	0	1	15	0	0	12	0	1	10	0	0	0	0	2	0	0	0	0	0	0	0	0	0	2	0	0	0	0	0	0	0	1	0	0	0	0	0	0	0	0	0
TCHnorm1.n	0	0	1	0	0	0	0	3	0	1	0	0	0	8	0	0	0	1	0	6	0	20	2	0	0	1	5	4	1	3	0	4	9	7	2	4	0	1	8	0	2	1	3	1	0
TCHnorm2.n.S	0	0	1	0	21	0	0	0	15	0	0	0	0	5	0	0	0	1	8	0	7	0	6	6	7	0	4	1	0	1	1	1	1	1	1	1	0	3	0	1	1	1	1	2	1
TCHnorm2.n.U	0	0	1	0	0	0	0	25	0	0	0	0	0	5	0	0	0	1	0	10	1	1	0	1	1	11	0	1	8	4	7	4	1	0	3	0	6	0	0	3	1	2	0	0	0

## Sheet: Table-prop-PAUVAT-res2 5-2023-0
	0	1	2	3	4	5	6	7	8	9	10	11	12	13	14	15	16	17	18	19	20	21	22	23	24	25	26	27	28	29	30	31	32	33	34	35	36	37	38	39	40	41	42	43	44
PAUVAT.d	23	0	19	0	15	0	14	0	7	0	12	0	0	0	0	0	0	0	0	1	0	0	0	6	0	0	1	0	0	0	0	0	0	0	0	0	0	0	0	0	0	0	0	0	0
PAUVAT.r	0	25	0	22	0	0	0	0	5	0	0	0	5	11	0	10	10	4	0	0	2	0	0	0	0	0	3	0	0	2	0	0	0	0	0	0	0	0	0	0	0	0	0	0	0
TCHnorm1.n	0	0	0	0	0	0	0	1	2	2	0	0	5	0	0	0	0	11	21	0	7	2	6	0	2	1	4	3	4	2	0	0	0	1	6	1	8	3	1	2	1	3	0	0	0
TCHnorm2.n.S	0	0	0	0	0	17	0	15	1	0	0	11	4	0	10	0	0	1	0	1	3	1	0	0	6	4	0	0	2	1	5	4	0	0	2	3	0	1	1	1	2	1	0	1	1
TCHnorm2.n.U	0	0	0	0	0	0	0	0	0	24	0	0	0	0	1	0	0	1	2	10	3	9	9	0	0	3	0	7	4	2	1	1	7	7	0	0	0	0	1	0	0	0	2	0	0

## Sheet: Table-prop-PAUNSY-res2 5-2023-0
	0	1	2	3	4	5	6	7	8	9	10	11	12	13	14	15	16	17	18	19	20	21	22	23	24	25	26	27	28	29	30	31	32	33	34	35	36	37	38	39	40	41
PAUNSY.d	0	3	21	10	1	11	1	0	7	2	12	0	11	1	2	5	1	3	2	0	0	3	0	0	0	0	0	0	0	0	1	0	0	1	1	0	0	0	0	0	0	0
PAUNSY.r	0	17	1	7	12	3	13	13	1	1	0	0	1	10	1	3	2	1	4	0	0	2	0	0	0	1	6	0	2	0	0	0	0	0	0	0	0	0	0	0	0	0
TCHnorm1.n	0	2	0	1	1	2	0	0	0	7	0	2	1	0	1	0	12	9	2	0	2	5	5	2	2	0	0	16	2	0	0	6	1	1	1	1	4	8	3	0	0	0
TCHnorm2.n.S	28	1	0	0	3	2	0	0	6	6	0	0	0	0	9	1	2	2	1	8	0	0	0	1	6	1	0	0	3	6	5	1	0	3	1	1	1	0	1	0	0	1
TCHnorm2.n.U	0	0	0	0	0	1	0	0	1	5	0	21	0	0	0	0	1	0	2	2	13	0	9	9	1	9	0	2	0	1	1	4	7	0	1	4	1	0	0	1	2	0

## Sheet: Table-prop-PAUMTZ-res2 5-2023-0
	0	1	2	3	4	5	6	7	8	9	10	11	12	13	14	15	16	17	18	19	20	21	22	23	24	25	26	27	28	29	30	31	32	33	34	35	36	37	38	39	40	41	42	43	44	45	46	47
PAUMTZ.d	0	1	1	0	0	14	15	14	0	0	2	0	0	12	1	0	8	11	0	0	0	2	0	2	0	7	0	1	0	1	0	0	0	0	0	1	0	0	0	0	0	3	0	0	0	0	1	0
PAUMTZ.r	0	0	28	0	22	0	0	0	0	17	2	0	0	0	0	0	0	0	0	0	0	3	4	1	0	0	0	8	0	0	0	7	0	0	0	3	1	0	0	3	0	0	0	0	0	0	0	0
TCHnorm1.n	0	1	0	2	1	0	0	0	3	0	4	0	6	0	8	0	2	0	2	0	0	7	4	3	16	0	1	0	3	8	11	0	0	0	2	0	2	1	1	1	1	1	3	5	1	0	0	0
TCHnorm2.n.S	28	15	0	0	0	0	0	0	0	0	3	8	0	0	2	1	1	0	6	6	6	1	0	4	0	0	0	0	3	1	0	0	3	0	1	1	1	2	1	0	1	0	1	0	1	0	0	1
TCHnorm2.n.U	0	0	0	21	0	0	0	0	13	0	4	1	10	0	3	10	2	0	0	1	1	1	4	0	0	1	7	0	0	0	0	0	2	6	3	0	0	0	1	0	2	1	0	0	0	2	0	0

## Sheet: Table-prop-PARBIU-res2 5-2023-0
	0	1	2	3	4	5	6	7	8	9	10	11	12	13	14	15	16	17	18	19	20	21	22	23	24	25	26	27	28	29	30	31	32	33	34	35	36	37	38	39	40	41	42	43	44	45	46
PARBIU.d	0	0	0	19	0	0	15	0	13	0	12	0	11	0	0	2	0	5	0	0	0	0	0	3	0	0	8	8	0	0	0	0	0	0	0	0	0	0	3	0	0	0	0	0	0	0	0
PARBIU.r	0	22	0	0	0	16	0	14	0	0	0	11	0	0	8	8	10	0	9	0	0	0	0	1	0	0	0	0	0	0	0	0	0	0	0	0	0	0	0	0	0	0	0	0	0	0	0
TCHnorm1.n	0	0	1	0	2	0	0	0	0	23	0	0	0	3	2	0	0	3	0	1	6	3	0	7	0	0	0	0	7	3	1	3	0	0	2	10	2	2	0	1	4	1	1	3	5	1	0
TCHnorm2.n.S	28	0	17	0	0	0	0	0	0	0	0	0	0	0	1	0	0	3	0	7	0	7	7	1	1	7	0	0	2	3	0	3	3	0	0	0	1	3	0	2	1	1	1	1	0	1	1
TCHnorm2.n.U	0	0	1	0	23	0	0	0	0	4	0	0	0	13	0	0	0	0	0	1	10	1	1	0	10	1	0	0	3	1	7	0	2	6	4	0	3	0	0	0	0	1	2	0	0	2	0

## Sheet: Table-prop-PAPZCL-res2 5-2023-0
	0	1	2	3	4	5	6	7	8	9	10	11	12	13	14	15	16	17	18	19	20	21	22	23	24	25	26	27	28	29	30	31	32	33	34	35	36	37	38	39	40	41	42	43
PAPZCL.d	0	23	23	0	0	0	22	0	1	0	0	11	0	0	0	0	0	4	4	0	0	6	0	0	0	0	0	5	0	0	0	0	0	0	0	0	0	0	0	0	0	0	0	0
PAPZCL.r	0	0	0	0	29	28	0	0	0	0	17	0	0	0	14	0	0	0	0	0	0	0	0	0	0	8	0	0	0	0	0	0	0	0	0	0	0	0	0	0	4	0	0	0
TCHnorm1.n	0	0	0	1	0	0	0	2	6	21	0	0	1	6	0	2	0	7	7	1	0	2	9	0	1	0	10	1	4	2	0	2	1	1	2	1	1	2	3	1	0	3	0	0
TCHnorm2.n.S	28	0	0	16	0	0	0	0	6	0	0	0	7	0	0	7	7	1	1	0	1	1	2	5	0	0	0	0	0	1	0	0	3	3	1	2	2	1	1	1	0	1	0	1
TCHnorm2.n.U	0	0	0	0	0	0	0	23	5	4	0	0	1	9	0	1	1	0	1	10	9	0	0	1	8	0	0	0	4	3	6	4	0	0	2	0	0	2	0	1	0	0	2	0

## Sheet: Table-prop-TCH6-res2 5-2023-04-
	0	1	2	3	4	5	6	7	8	9	10	11	12	13	14	15	16	17	18	19	20	21	22	23	24	25	26	27	28	29	30	31	32	33	34	35	36	37	38	39	40	41	42	43
TCH6.d	0	0	0	0	0	5	7	0	64	0	0	12	0	0	0	0	0	0	0	0	0	11	0	0	0	0	0	0	0	0	0	1	0	0	0	1	0	0	0	0	0	0	0	0
TCH6.r	0	0	0	0	0	44	0	0	5	0	0	0	0	0	0	0	32	0	0	0	0	1	0	0	0	0	0	0	0	0	0	0	0	0	8	8	0	1	0	0	0	0	0	0
TCHnorm1.n	0	0	2	22	0	0	0	1	0	1	6	12	0	2	4	0	0	0	1	3	12	2	0	0	7	2	3	1	1	3	1	1	3	1	1	0	0	0	1	0	2	2	0	1
TCHnorm2.n.S	14	14	0	0	9	0	7	7	0	0	3	2	7	6	0	1	0	5	0	3	0	1	0	3	1	1	0	0	3	2	2	2	1	2	0	0	1	0	1	0	0	0	1	0
TCHnorm2.n.U	0	0	21	4	0	0	0	1	0	12	4	1	1	0	9	9	0	1	8	1	0	2	6	2	0	2	4	4	0	0	0	0	0	0	0	0	1	2	0	2	0	1	0	0

## Sheet: Table-prop-TCH5-res2 5-2023-04-
	0	1	2	3	4	5	6	7	8	9	10	11	12	13	14	15	16	17	18	19	20	21	22	23	24	25	26	27	28	29	30	31	32	33	34	35	36	37	38	39	40	41
TCH5.d	0	0	0	0	0	0	0	15	0	0	0	11	0	0	35	0	0	0	0	0	0	0	20	0	0	0	0	1	0	0	0	0	10	0	0	0	0	0	0	6	0	0
TCH5.r	0	0	0	0	0	0	0	65	0	0	0	7	0	0	3	0	0	0	0	0	0	0	10	0	0	0	0	0	0	0	0	0	13	0	0	0	0	0	0	0	0	0
TCHnorm1.n	0	2	0	0	1	0	7	1	2	5	1	9	19	5	0	2	1	0	2	0	11	0	0	0	3	2	1	6	0	2	1	4	0	2	1	1	3	5	0	0	0	0
TCHnorm2.n.S	20	0	10	9	8	9	4	0	6	0	0	1	0	0	0	4	0	5	4	1	0	0	0	3	0	3	3	1	1	1	3	1	0	1	1	2	1	0	0	0	1	0
TCHnorm2.n.U	0	21	1	0	0	0	4	0	1	9	12	1	0	9	0	1	8	1	0	6	0	7	0	2	4	0	0	0	4	2	0	1	0	2	1	0	0	0	2	0	0	0

## Sheet: Table-prop-TCH4-res2 5-2023-04-
	0	1	2	3	4	5	6	7	8	9	10	11	12	13	14	15	16	17	18	19	20	21	22	23	24	25	26	27	28	29	30	31	32	33	34	35	36	37	38	39	40	41
TCH4.d	0	0	0	0	0	0	0	0	0	0	0	0	46	0	46	0	0	0	0	0	0	0	0	3	0	0	0	0	0	0	0	0	0	0	2	0	0	0	0	0	0	0
TCH4.r	0	0	0	9	0	0	6	0	0	0	2	3	6	4	3	15	12	0	3	0	0	0	8	8	0	6	0	6	0	3	0	0	1	0	3	0	0	0	0	0	0	0
TCHnorm1.n	0	2	0	7	0	18	0	6	3	1	1	0	1	12	0	0	0	0	4	10	3	0	1	2	3	0	1	1	8	2	1	1	1	3	1	0	1	2	1	0	3	0
TCHnorm2.n.S	15	0	13	4	9	0	7	0	7	7	7	6	0	2	0	0	1	0	3	1	0	0	3	1	0	1	3	2	0	1	0	2	1	1	1	1	1	0	1	0	0	1
TCHnorm2.n.U	0	21	0	4	0	4	1	10	1	1	0	1	0	1	0	8	7	8	0	0	5	7	0	2	4	4	0	0	0	2	4	0	1	0	0	1	0	0	0	2	0	0

[truncated: 3 more sheets: Table-prop-TCH3-res2 5-2023-04-, Table-prop-TCH2-res2 5-2023-04-, Table-prop-TCH1-res2 5-2023-04-]
