# Supplementary material for: Pediatric acute myeloid leukemia tumor composition predicts patient outcomes at diagnosis and reveals mechanisms of resistance to chemotherapy
Source: Research Square preprint supplement (doi:10.21203/rs.3.rs-4669225/v1), 2026-01-23
Supplement: Supplementary file 5 [file 3edc0115ae3badafc82aa63f.xlsx]

## Sheet: TF R3 VAT.C2vC0
ID	Regulon Size	enrichmentScore	NES	pvalue	p.adjust	rank	leading_edge	core_enrichment
TBX19	181	0.625337	2.2801	1e-10	5.52e-08	1018	tags=43%, list=17%, signal=37%	4602/51147/6944/3660/5987/84661/219402/100652772/729082/267002/3295/6480/115761/54482/129531/339804/55862/788/55188/5378/90317/79830/140691/57120/90861/55634/64172/60526/55449/79415/84955/23097/80208/27332/54916/10113/8417/54838/55435/79738/83852/55140/11064/3551/22900/51315/51110/57551/285343/64766/11097/9453/93627/81562/55657/84984/10230/23386/23272/92255/23341/7072/55578/55245/6654/9831/80153/…
ATF1	195	0.602342	2.05906	1e-10	5.52e-08	1354	tags=50%, list=23%, signal=40%	5567/60592/55109/10240/10890/3660/54749/10928/64801/27430/1070/729082/85865/7514/54482/129531/147657/55862/51510/11335/90317/10282/64431/7155/84272/7520/134510/7705/84955/5994/23097/134359/6814/51318/8417/55435/79738/160897/83852/55055/22900/79596/54908/51315/57551/55166/79634/9039/9581/285343/112479/9879/1385/9453/25913/80010/23272/92255/7072/7257/55578/6654/55197/64863/8674/55425/8773/171546/91…
CXXC1	236	0.579365	2.06413	1e-10	5.52e-08	1197	tags=45%, list=20%, signal=37%	28958/65993/64949/8607/54865/5710/51728/3661/138428/4720/54939/126382/51154/3155/788/245812/79064/374659/64802/55449/79415/6195/10139/2639/2618/55111/29082/8086/3059/146712/10113/10726/57017/54903/10607/51367/25880/54058/79709/26995/8266/80017/9054/8558/10587/80152/9277/8045/327/79084/124401/2224/51368/11020/84304/80279/55657/790955/5373/84984/8243/400506/65094/65263/23386/55695/1819/4968/171568/…
ANKZF1	242	0.580021	2.07259	1e-10	5.52e-08	2071	tags=69%, list=35%, signal=47%	9321/64318/84450/55035/54482/129531/23780/8405/55188/79830/57120/472/285331/64172/80342/5636/84656/84307/10885/80208/27332/2073/253143/79800/55719/4548/51747/10902/10521/79738/84874/11064/3551/22900/84869/10443/4144/51028/9039/9581/143/29068/64766/11097/55251/9453/132949/80279/152926/28970/63901/57185/9988/8790/23398/56339/23341/4891/23637/55578/55245/11128/112849/55285/23185/9906/55197/22984/554…
FLI1	200	0.605262	2.19604	1e-10	5.52e-08	1069	tags=40%, list=18%, signal=33%	4602/51147/6944/3660/5987/84661/54749/51300/695/84450/55319/8717/3295/6480/54482/55862/29902/788/55188/10126/5378/90861/729440/60526/55449/79415/84955/115209/23097/54916/79800/221120/8935/8417/54919/54838/55435/408/2218/83852/55140/55526/3551/90120/22900/7157/51315/80017/79634/84265/285343/64766/79084/9879/11164/93627/4221/10230/23386/55578/10788/6654/9831/6778/199745/7374/50485/23408/84320/92241…
ZNF322	204	0.602913	2.0932	1e-10	5.52e-08	1380	tags=46%, list=23%, signal=37%	56898/60592/55109/10240/9321/27430/85865/55035/90317/79830/10282/57120/64431/55634/84272/7520/7705/55074/27332/134359/2073/6814/253143/4863/10902/4090/56986/79738/23091/339500/55055/79596/10443/9039/3796/29068/387032/9453/132949/7700/5001/23190/9988/340252/93973/2635/7707/23341/7072/23637/5289/55285/55197/11196/55425/5965/9994/80095/9325/57187/23306/9330/4931/64864/60684/5356/10254/55599/4012/660…
ACTR2	236	0.614168	2.22022	1e-10	5.52e-08	1232	tags=42%, list=21%, signal=34%	10092/7336/3281/7555/5685/3417/348235/23741/7360/7265/1965/51076/6118/10229/60492/11198/23184/86/8405/55862/3454/51538/2287/79830/55634/5928/25847/7520/26292/50809/55737/10885/102/54969/3059/54838/55435/4528/10550/55153/55055/55140/64747/168451/158234/4155/4190/10714/57551/51028/143/84081/79717/834/2967/8195/83448/63901/8243/23272/10069/2108/55869/7707/7257/1355/7443/55285/23185/129831/55425/6391…
NFYC	173	0.637932	2.27226	1e-10	5.52e-08	643	tags=38%, list=11%, signal=34%	10092/9315/8992/51147/6944/5880/136647/51070/3660/5987/84313/54749/10922/51300/3396/79626/51645/8717/10229/267002/138716/6480/23184/10238/55862/8636/131474/788/10126/51287/64110/29901/140691/10287/90861/1376/132001/729440/7263/55449/79415/23557/23596/114984/10113/57017/55009/113829/54919/54838/55435/2968/6404/84191/9546/90120/22900/7157/83695/51315/79634/84265/8655/285343/79084
ZKSCAN7	194	0.642293	2.25577	1e-10	5.52e-08	1601	tags=65%, list=27%, signal=49%	51147/10240/5987/84450/85865/267002/54482/29902/788/55188/5378/90317/79830/57120/90861/1788/55634/93183/132001/55131/84272/64172/148327/283537/493/5636/100505783/60526/7705/10885/134359/54916/79800/54903/55435/55776/79738/2218/160897/339500/83852/84874/9477/55140/3551/22900/7157/79634/1962/9581/285343/64766/112479/387032/11020/9849/93627/81562/23357/340252/23386/92255/23341/7072/55578/5289/55245/…
IRF2	143	0.701533	2.32573	1e-10	5.52e-08	725	tags=43%, list=12%, signal=39%	10092/8992/51147/6944/64968/10890/5987/54749/10928/64801/51300/219402/79626/7265/55319/1070/6118/100652772/267002/3295/23184/115761/54482/129531/10238/8405/339804/55862/3454/3155/131474/788/51510/140691/90861/55634/79607/132001/84272/64802/55449/79415/84955/23557/54916/63931/10113/57017/8417/54838/55435/55140/90120/22900/51315/51110/79634/285343/9453/81562/79023/84984
PKNOX1	204	0.626714	2.27943	1e-10	5.52e-08	1335	tags=52%, list=23%, signal=42%	51147/9321/219402/84450/51076/729082/10229/267002/3295/54482/86/8405/55188/23059/79830/57120/55634/93183/64802/64172/493/5636/60526/84307/55737/10885/80208/27332/54916/2618/146712/55719/54838/55776/56986/79738/9570/9477/55140/11064/3551/158234/22900/4155/25880/10443/57551/79634/51028/143/641339/64766/112479/93627/81562/28970/63901/84984/400506/57185/23386/27030/92255/55869/8790/56339/23341/54067/…
ASF1A	217	0.632503	2.1808	1e-10	5.52e-08	1380	tags=50%, list=23%, signal=40%	56898/7336/55791/60592/10240/9321/10890/348235/64801/27430/64318/1965/1070/85865/11198/55035/9166/86/147657/10944/128061/5110/57120/64431/11340/84272/285331/5928/10455/7705/55737/27332/134359/64710/6814/4863/51318/6726/10902/51574/56986/23091/339500/55153/55055/4331/168451/79596/57570/10443/54908/55166/79634/9039/112479/55251/9453/132949/5001/83448/115106/340252/80010/6596/151246/142940/7707/4891…
NR1I2	186	0.64461	2.1644	1e-10	5.52e-08	1433	tags=56%, list=24%, signal=44%	56915/65993/64949/8607/10922/51300/3661/8717/113655/3295/115761/131474/10126/51287/29901/729440/7263/204/148327/60526/55449/79415/10139/1019/79763/8086/10113/57017/54903/54919/408/2968/2021/4358/51367/847/64747/90120/4351/26995/80017/84875/8558/10587/80152/327/79084/51368/11020/29125/55657/4221/65263/23386/9894/79961/80142/29920/112849/25974/6778/1802/51337/6182/4507/7374/146547/50485/23408/9875/…
ZMYND11	270	0.542245	1.98426	1.57445e-10	8.69096e-08	1612	tags=50%, list=27%, signal=38%	4602/3676/54749/10928/695/84450/729082/3295/6480/54482/55862/55188/5378/79830/90861/7155/60526/84955/115209/23097/10885/80208/102/54916/79800/55719/8417/54919/55435/10521/79738/2218/160897/83852/55526/3551/22900/51315/57551/135293/79634/143/285343/29068/64766/9879/1385/9849/93627/4221/25913/139818/23386/23272/92255/7072/55578/10788/6654/9831/55197/64863/55425/4507/50485/84320/9875/51474/91137/816…
TFPT	270	0.518829	1.80652	1.59217e-09	8.78876e-07	704	tags=29%, list=12%, signal=27%	28958/154791/4702/8673/3384/56915/79077/280636/51147/65993/6944/136647/83658/3692/5699/55052/51070/64949/51258/8815/1891/9551/3396/51504/10245/29108/138716/54939/3028/8636/28956/10126/51287/84967/55954/10330/28971/10016/64976/6183/118487/64978/64981/23557/1019/6048/64963/114984/90871/79763/51160/593/2968/11344/1978/51647/57418/4358/8625/10467/2738/4830/374291/51069/55168/10573/8045/51192/122704/8…
ZNF616	228	0.566121	2.02705	1.66699e-09	9.20176e-07	1354	tags=51%, list=23%, signal=41%	55791/55109/10240/9321/10890/3660/1070/85865/267002/3295/54482/129531/147657/51510/55188/79830/10282/23189/57120/90861/55634/7155/79692/84272/64172/7705/84955/23097/10885/80208/27332/134359/2073/54916/253143/55719/55435/79738/2218/160897/339500/83852/9477/22900/79596/54908/51315/57551/55166/79634/1962/9581/64766/112479/387032/9453/9849/132949/93627/25913/9988/340252/80010/23272/92255/23341/7072/2…
ASCL2	127	0.644956	2.14433	6.62977e-09	3.65963e-06	813	tags=36%, list=14%, signal=32%	8673/65993/5880/64949/10922/3661/79626/8717/113655/29108/138716/115761/1628/131474/10126/58485/64110/29901/729440/7263/204/374907/55449/79415/6195/150223/2529/23596/79763/593/10113/57017/55009/84948/2021/90120/23313/84875/8655/84304/55657/65990/55695/80142/29920/11035
ZSCAN31	141	0.613518	2.06322	2.3223e-08	1.28191e-05	1468	tags=57%, list=25%, signal=44%	55791/2193/56652/219402/126382/8405/23059/93183/79607/55131/64802/64172/79833/4817/84307/55333/10885/2618/166378/100132707/9570/55140/158234/25880/105377348/50840/641339/91151/124401/93627/81562/28970/84984/400506/57185/27030/55869/171568/124790/56339/54067/11128/121642/25974/80153/84909/22984/286467/80227/10780/26589/10940/7918/51103/125061/6302/114044/55846/7349/58477/56912/339318/101101775/798…
ZNF491	162	0.587234	1.95186	3.35903e-08	1.85418e-05	1588	tags=56%, list=27%, signal=42%	84450/54482/29902/55188/1788/55131/64172/148327/60526/84307/10885/80208/54916/166378/79800/221120/55719/54903/100132707/10521/79738/2218/84874/55140/3551/22900/8558/285343/641339/64766/124401/9849/93627/23357/28970/10230/23386/100190939/55578/55245/11128/9906/9831/80153/22984/23269/55425/4507/81571/10780/50485/56919/23408/84320/9875/127428/9678/1479/90673/25929/57506/91754/10617/90987/124454/8489…
PPARA	167	0.59194	2.03196	3.8892e-08	2.14684e-05	1801	tags=64%, list=31%, signal=46%	9321/729082/267002/3295/54482/86/55188/79830/57120/90861/55131/283537/493/7705/23097/10885/80208/27332/54916/253143/55719/54838/2218/160897/83852/9477/3551/22900/4155/57551/79634/143/29068/64766/112479/9453/93627/57185/23386/23272/92255/23341/23637/5289/55245/6654/11128/23185/80153/55197/64863/23269/57492/55425/23306/81627/127428/4931/4077/25929/57325/55735/53981/91754/9416/23080/10617/83746/8449…
CREB3	168	0.569271	1.95804	7.78072e-08	4.29496e-05	1144	tags=43%, list=19%, signal=36%	28958/5696/3692/84062/100507463/5710/51728/51504/10245/4720/339229/54939/64928/3028/126382/28956/4707/3155/29796/79064/84967/55954/10330/10016/374659/64802/79833/4817/23557/55111/29082/11344/9570/51647/400569/51367/8625/5721/50840/81493/55168/152100/2224/51368/84304/79004/790955/5688/26517/65094/171568/124790/10005/3611/112812/10436/4738/92960/9049/7918/5719/11333/6302/5694/11264/84283/29095/1716…
TIGD1	206	0.518931	1.77731	8.82152e-07	0.000486948	1546	tags=47%, list=26%, signal=36%	6742/9321/120534/219402/64318/84450/51076/60492/55035/54482/8405/23059/79830/57120/55634/93183/285331/64172/5636/84307/55333/55737/10885/27332/2618/79800/4548/56986/55153/546/101927288/11064/158234/84869/10443/166785/51028/55251/132949/93627/7700/80279/152926/28970/83448/55171/57185/27030/55869/8790/2635/56339/54067/23637/11128/84524/23185/339290/221443/55425/80227/10780/9994/51377/151613/4931/54…
HDAC3	175	0.54203	1.83154	9.76871e-07	0.000539233	876	tags=27%, list=15%, signal=24%	2079/5696/3692/5710/51728/9967/5686/51504/10245/4720/90480/339229/64928/3028/126382/28956/51538/440574/29796/79064/10450/55967/516/55111/29082/22826/11344/51647/246184/8625/10775/10467/4726/29099/5721/374291/81493/122961/79717/9789/790955/5688/4738/6835/4696/57019/10445
STAT2	101	0.630062	2.01387	1.54625e-06	0.000853527	1613	tags=63%, list=27%, signal=47%	54739/100507463/4939/219285/3431/23780/788/245812/55188/140691/64802/55601/80342/493/79415/6195/80208/3430/3059/55719/54838/4938/55140/11064/3551/158234/143/80279/81844/63901/57185/23386/79961/151636/55245/11128/55748/23185/81704/127428/3712/57325/84173/83746/84498/79777/91351/6772/7586/55230/3140/1487/7508/23181/2733/6041/10346/131965/113/84912/79675/7024/2330/65095
ZNF568	116	0.596024	1.91377	2.36099e-06	0.00130326	1914	tags=68%, list=33%, signal=47%	56898/9321/55035/439949/23059/79830/57120/64172/10885/27332/4863/4548/160897/168451/158234/120526/9666/132949/152926/28970/83448/55171/101927720/340252/6596/23637/11128/84524/55285/54677/221443/55425/10780/79886/9994/80095/4931/4436/5356/348995/27042/64395/9025/10617/55900/339318/7586/148103/4594/79876/252983/55120/84527/221264/153396/51174/57209/8504/163131/57102/157567/153642/55094/57696/5471/1…
SETDB1	247	0.47353	1.61618	3.71623e-06	0.00205136	1852	tags=49%, list=31%, signal=35%	56652/5987/8125/695/83605/90861/1788/55131/84656/4817/23097/80208/4836/54916/253143/10521/2218/84874/3551/84861/123096/4144/143/64766/124401/387032/23357/81844/10454/55738/23386/93973/100190939/23341/7343/55245/11128/9906/8994/9831/80153/6778/22984/23269/4507/81571/54799/84320/9875/9909/63894/127428/51112/60684/22978/25929/23550/57506/55813/91754/9761/9416/23080/51490/84498/146198/90987/5863/8489…
TIGD2	160	0.533323	1.82379	3.8163e-06	0.0021066	1535	tags=41%, list=26%, signal=31%	5567/60592/55109/7514/147657/11335/57120/7155/7520/134510/7705/134359/79800/55435/79738/2218/160897/339500/83852/55055/9879/9849/25913/9988/139818/80010/23272/92255/142940/23341/7072/55578/129831/54799/9330/60684/22978/9678/128/27042/9868/53981/5884/146198/140609/7978/10640/55763/55783/25998/2957/55156/6059/55364/8615/144245/91801/8545/84437/56916/147991/84920/64921/54585/80067
ZNF763	196	0.503208	1.71002	3.89503e-06	0.00215006	2214	tags=67%, list=38%, signal=43%	729082/54482/55188/472/60526/84307/23097/80208/27332/54916/253143/166378/79800/55719/4548/10521/79738/2218/84874/11064/3551/22900/84861/57551/4144/143/641339/64766/124401/9849/93627/81844/28970/9988/23272/92255/55578/55245/6654/11128/9906/9831/84909/64863/23269/285527/4507/81571/10780/84320/23306/81627/81704/127428/23506/545/4077/90673/57506/91754/23080/57560/84498/146198/90987/5257/23317/9924/22…
ZNF250	187	0.519241	1.85073	3.93887e-06	0.00217426	1532	tags=53%, list=26%, signal=40%	29081/51023/84062/100507463/9967/219402/10229/339229/126382/8405/51538/3155/79064/23059/10016/93183/79607/64802/64172/79833/84307/55333/29082/100132707/9570/400569/158234/246184/25880/10775/9054/50840/81493/55168/641339/91151/79717/152100/28970/5373/84984/400506/57185/65094/27030/55869/171568/56339/54067/11128/79741/23185/80153/84909/80227/10780/91526/26589/51103/202243/6302/114044/11264/29095/37…
ZNF664	158	0.544171	1.88541	4.48338e-06	0.00247482	1703	tags=53%, list=29%, signal=39%	1021/729082/7514/3295/3181/55188/57120/90861/7155/493/8832/23097/10885/80208/79800/10521/2218/160897/64766/9879/29125/23357/23386/23272/92255/23341/7343/5289/6654/8994/55197/4294/57492/4507/84320/9875/23306/23506/4077/9678/57470/25929/23550/53981/91754/9416/57560/90987/55835/84899/5257/26031/285605/10198/22880/23382/338596/84219/91749/25896/23199/55125/9656/252983/26259/55779/55311/5198/64921/545…
DMAP1	240	0.47023	1.68396	5.29238e-06	0.00292139	1823	tags=47%, list=31%, signal=34%	29985/56652/84450/374403/1788/55131/148327/84656/10885/4548/10607/55776/84958/84874/3551/84861/26995/8558/80152/64766/79084/124401/11020/23357/142/10454/55738/23386/1819/23341/7343/55245/11128/9906/8994/9831/10445/1802/22984/7318/23269/57492/4507/10780/84320/9875/348180/89781/8602/57470/25929/23550/55735/55846/9761/9416/115708/51490/83746/84498/84532/90987/5863/197407/124454/7589/84899/9924/26048…
ZBTB2	256	-0.754741	-1.56363	1.50604e-05	0.00831336	959	tags=54%, list=16%, signal=47%	7159/53371/65117/83452/10605/84640/3189/5290/26959/3845/9655/7812/7189/55249/9451/26092/5007/22936/54790/55279/8036/1859/7695/23215/6049/7110/5537/23219/166968/7323/64376/91746/29072/153222/79612/25909/283624/23469/27107/84945/25897/122830/10208/5701/4780/9689/9698/7326/11236/9685/5520/51164/988/54915/9107/51444/55602/5504/55186/3839/149041/168850/23011/25948/7534/51552/9318/160760/51696/286006/1…
ZNF786	82	0.628673	1.96876	1.52755e-05	0.00843208	1586	tags=62%, list=27%, signal=46%	51147/267002/54482/29902/55188/79830/1788/79607/55131/64802/64172/84307/10885/54916/100132707/55140/3551/64766/124401/11020/93627/81562/28970/84984/57185/55245/11128/9831/80153/22984/23269/10780/50485/23408/84320/127428/25929/10201/201973/7586/55028/51058/23181/84527/6041/80317/131965/57209/163131/79175/162963
ZMAT1	170	0.509876	1.80707	1.72036e-05	0.00949637	1563	tags=48%, list=27%, signal=36%	51351/1021/729082/55035/7514/54482/55188/5378/472/8832/23097/80208/79800/55719/4548/10521/79738/2218/83852/84874/11064/22900/4144/64766/9879/1385/9666/9849/93627/63901/9988/139818/23272/92255/100190939/8790/7072/55578/11316/285527/4507/54799/64582/84320/151613/23506/545/9678/90673/22862/5884/57560/51380/146198/84899/5257/23317/10198/9924/25998/11329/200558/57337/6059/8615/11119/55125/27340/252983…
CEBPG	358	-0.711274	-1.47737	1.91479e-05	0.0105696	1083	tags=47%, list=18%, signal=41%	27125/10006/9337/6651/149371/9861/10270/55922/5597/55054/80264/10725/51026/26224/22894/9798/60493/571/9329/7159/53371/65117/10605/3189/5290/26959/3845/9655/7812/7189/140901/55249/55660/4848/9451/23169/253260/26092/5007/55279/55773/8036/9762/1859/7695/23215/6049/7110/10308/7109/147339/23219/165324/126731/166968/7403/3313/51340/64376/91746/51755/7994/5927/29072/84933/9821/153222/7693/79612/55269/25…
DNMT1	194	0.484377	1.69121	2.37422e-05	0.0131057	1614	tags=50%, list=27%, signal=38%	56652/8607/54865/51645/86/3181/51154/90861/9238/55131/493/84656/50809/2639/2618/166378/8086/55719/4548/54903/54919/10607/7157/79733/54058/10714/26995/8558/9277/327/79084/2224/9879/11020/23357/142/8243/65263/23386/1819/4176/7343/55245/10445/1802/22984/7374/22948/10940/56919/9875/348180/8602/4436/3712/57470/9136/25929/55735/7409/7112/10951/55846/10999/55759/9416/115708/51490/2068/83746/4172/124454/…
ZNF222	334	-0.716319	-1.49007	2.80927e-05	0.0155072	1029	tags=45%, list=17%, signal=40%	10725/91120/26224/22894/9798/80818/60493/163590/571/7159/53371/65117/9818/10605/84640/5290/26959/51562/9655/7812/7189/3612/10059/55660/9451/23169/5007/114883/10276/55773/51118/1859/7695/23215/6049/7110/245711/147339/165324/166968/55175/51340/64376/51163/91746/51755/7994/29072/9821/153222/7693/226/25909/55818/23360/23469/55854/122830/65986/10208/5701/7844/7296/26036/9698/9685/5520/51164/988/9107/1…
ZNF175	201	0.468729	1.67214	3.03983e-05	0.0167798	1649	tags=50%, list=28%, signal=37%	55109/10928/729082/85865/54482/90317/57120/7155/79692/84272/7705/5994/23097/27332/134359/79800/10521/79738/2218/160897/339500/54908/57551/79634/9829/3796/29068/64766/9849/25913/9988/340252/23272/92255/10444/23341/7072/23637/55578/5289/6654/55197/285527/8674/55425/54799/80095/23306/81627/9330/4077/4436/64864/55833/60684/22978/1479/25929/22862/53981/5884/9416/9025/10617/84295/146198/90987/55835/140…
ZNF700	244	0.438233	1.58676	3.23366e-05	0.0178498	1582	tags=38%, list=27%, signal=29%	55109/729082/55729/55035/7514/472/7155/23097/80208/27332/134359/2073/253143/79800/55719/4548/10521/79738/2218/339500/83852/11064/84436/57551/4144/143/64766/9879/1385/9849/25913/9988/139818/23272/92255/23398/4891/7072/5289/23269/285527/81571/54799/84320/23306/9330/178/151613/23506/545/64864/60684/10254/22978/4012/22862/5884/23080/57560/51380/146198/90987/84899/5257/23317/10198/55763/90957/26046/22…
EPC1	365	-0.711773	-1.48238	3.28668e-05	0.0181425	1156	tags=52%, list=20%, signal=45%	8896/57711/9412/84285/10933/51441/5929/1022/6198/100652748/10520/1399/255919/51187/10920/27125/10006/6651/51503/10270/168374/5597/10042/148268/79577/23168/1977/80264/5717/51026/26224/22894/56902/60493/92345/163590/25949/124491/266812/54556/9329/53371/65117/1659/10605/101927275/55270/5290/51562/3612/1060/55660/4848/23169/58526/25977/59348/26092/57062/148423/7695/23215/6884/6049/7110/165324/7341/95…
ZNF586	431	-0.703504	-1.45437	4.13353e-05	0.0228171	1155	tags=45%, list=20%, signal=39%	57711/9412/56990/10933/51441/1022/23633/6198/54861/100652748/126070/10520/1399/255919/79818/51187/10920/10006/6651/51503/10042/148268/79577/23168/1977/80264/5717/91120/26224/22894/9798/60493/23435/163590/124491/151056/54556/53371/65117/1659/5290/51562/55905/1060/10059/55660/4848/58526/253260/25977/59348/114883/94241/57062/55773/7695/23215/59345/6049/7110/245711/147339/165324/7341/64795/7323/3313/…
SNAPC5	208	0.460812	1.62947	5.15244e-05	0.0284415	1291	tags=47%, list=22%, signal=38%	7336/55791/29081/56652/100507463/54865/5710/7265/6118/4720/60492/23184/126382/55862/128061/3155/245812/79064/23059/51019/10016/79607/64802/64172/79833/4817/84307/55737/10885/2618/29082/3059/100132707/9570/400569/158234/25880/10775/4190/50840/81493/91151/79717/2967/28970/8195/5373/83448/84984/55171/400506/57185/27030/55869/171568/124790/56339/10436/1355/11128/23185/10445/84909/80227/22948/26589/10…
ZNF446	119	0.540271	1.79881	5.82872e-05	0.0321745	1397	tags=39%, list=24%, signal=31%	51147/84062/23059/1788/93183/55131/146712/9570/84958/2738/26995/9054/50840/124401/11020/400506/57185/10101/65094/23386/1819/112812/11128/9906/80153/10445/22984/51006/3712/57470/81890/57325/55846/7349/51490/339318/79777/90987/197407/26048/7586/54944/84219/1487/7508/23404/91875
ZNF609	128	0.537356	1.71094	6.20434e-05	0.034248	1703	tags=49%, list=29%, signal=36%	51147/6480/90861/1788/148327/23097/80208/54916/408/10521/84874/55526/3551/22900/123096/80017/84875/64766/124401/4221/10454/23386/8994/9831/80153/6778/7318/57492/50485/84320/9875/92241/9909/63894/81704/127428/51112/10723/10025/23550/57506/91754/9416/89849/84532/5863/9924/23382/54956/84219/80198/26259/23181/80317/489/7011/7024/22937/2313/57326/7625/9203/2909
STAT1	31	0.773165	2.02967	6.59503e-05	0.0364046	440	tags=39%, list=7%, signal=36%	54739/54809/4939/219285/3434/3428/3431/91543/3433/55601/3437/94240
RFX5	136	0.51513	1.73293	7.27307e-05	0.0401473	1862	tags=57%, list=32%, signal=40%	5987/695/3181/9238/10139/80208/54916/10521/83852/84874/55526/3551/22900/84861/143/64766/10454/23386/9894/23341/55245/9831/80153/6778/22984/23269/4507/50485/9603/9875/63894/127428/51112/22978/55813/91754/9761/9416/10617/84532/5863/124454/9924/8216/22880/23382/85363/84219/91749/80198/26259/7006/23277/23181/80317/5198/7011/79175/23450/7024/80324/22937/57326/7625/9203/57205/57147/27434/79671/51479/51…
NR1D2	464	-0.689616	-1.41455	7.38884e-05	0.0407864	960	tags=39%, list=16%, signal=36%	9329/7159/53371/22853/65117/9818/10605/84640/3189/5290/26959/3845/9655/7812/7189/140901/10059/55660/9451/23169/253260/262/25977/26092/5007/22936/54790/55279/55773/8036/1859/7695/23215/6049/7110/10308/7109/147339/23219/166968/7403/3313/55175/51340/64376/51163/91746/51755/7994/57708/29072/9821/153222/79612/226/6875/25909/55818/283624/90268/23360/23469/27107/84945/55854/25897/122830/65986/10208/5701…
HSF4	134	0.522978	1.8011	8.09933e-05	0.0447083	1610	tags=48%, list=27%, signal=35%	10922/3661/8717/113655/729440/84964/10139/10113/10607/2968/5833/3551/80017/84875/8558/80152/124401/29125/55657/4221/10454/9894/79961/80142/29920/7343/6778/10616/4294/51337/146547/84320/9875/9909/51112/23550/7409/57506/10999/91754/89849/51490/2068/5863/11158/79058/9924/8216/22880/84219/23199/80198/26259/55779/55311/5198/84988/7011/55643/113/92714/93100/80324/22937
ZNF681	108	0.543805	1.7985	0.000107702	0.0594517	2039	tags=65%, list=35%, signal=43%	9840/84450/54482/55188/5378/79830/55843/84955/54916/80312/4548/100129842/2218/160897/339500/135293/285343/64766/9879/9666/9849/93627/25913/340252/7072/55578/84320/81627/4436/9678/55133/25929/148103/9331/57097/25896/6059/8615/55726/252983/51809/84527/221264/10111/57209/730087/163131/7582/56242/162963/1662/8505/153364/118924/284443/90624/7617/84924/1121/55795/285753/84140/2078/55005/7730/9786/84455…
SMARCA4	129	0.523255	1.72876	0.000121761	0.067212	1427	tags=39%, list=24%, signal=30%	56652/8607/54865/51154/1788/55131/3276/2639/55179/10607/26995/9277/124401/23357/142/400506/10574/1819/4176/171568/11128/9906/10445/1802/22984/56919/9875/348180/8602/3712/81890/9136/55735/116138/55846/23640/115708/51490/83746/4172/197407/124454/26048/374920/54944/5905/14/80755/23404/23277
FOSB	22	-0.949763	-1.75271	0.000128028	0.0706715	121	tags=68%, list=2%, signal=67%	117289/57132/23645/5054/10370/1848/9592/1316/3725/1843/7538/28984/1958/10365/467
ZNF425	56	0.654905	1.91835	0.000144424	0.0797221	939	tags=41%, list=16%, signal=35%	51147/29985/9840/84450/439949/55188/79830/1788/55131/64172/148327/54916/80312/64766/93627/81562/55245/9906/80153/22984/23269/10780/50485
ZNF93	239	0.435499	1.5542	0.000148717	0.082092	1380	tags=32%, list=23%, signal=26%	56898/5567/60592/55109/3428/55729/85865/147657/51510/90317/64431/79692/84272/7705/27332/134359/2073/6814/4863/4090/100129842/160897/339500/55055/79596/54908/55166/3796/29068/9453/132949/7700/23190/25913/340252/142940/7707/23341/7072/23637/5289/55197/8674/55425/54799/80095/57187/23306/9330/178/64864/60684/5356/10254/22978/57459/22862/6605/9868/5884/55900/140609/10640/23548/55763/26046/22926/466/25…
SET	148	0.490626	1.59768	0.000158053	0.0872453	1232	tags=27%, list=21%, signal=22%	3925/5685/23741/84450/11198/2287/5928/7520/50809/10885/64710/4528/55055/65008/4190/51028/10428/29068/9879/2967/142/10969/51642/65109/1355/84524/129831/221443/4436/3146/6632/9678/9255/23556/6605/5884/58477/79649/10199/6117
ASF1B	79	0.606193	1.90233	0.000174347	0.0962397	935	tags=46%, list=16%, signal=39%	65993/8815/84313/51728/348235/3396/51645/10856/54939/51154/1854/203068/6119/29901/1376/374659/7263/26292/23557/114984/4946/8086/57017/113829/54919/84191/79733/83695/10573/2224/65263/55695/896/2271/6182/10935
ERG	153	0.489074	1.60343	0.000175557	0.0969075	1801	tags=50%, list=31%, signal=36%	84450/1021/54482/79830/1788/55131/7705/84955/27332/54916/79800/100129842/2120/10521/2218/160897/84874/57551/285343/29068/64766/7700/79899/10230/100190939/7072/55578/5289/10788/55197/23269/57492/55425/10780/54799/4436/55833/22978/9678/1479/55133/25929/29899/22862/10617/90987/4773/84899/148103/9331/85363/57097/25896/55028/8615/55726/2982/252983/51809/54832/84527/57209/163131/7582/7620/56242/162963/…
ZNF181	183	0.456384	1.59271	0.000183246	0.101152	1546	tags=43%, list=26%, signal=33%	55791/9321/55035/8405/23059/79830/57120/55634/93183/79607/55131/285331/64172/5636/84307/7705/10885/27332/253143/4548/10902/55179/56986/9570/168451/158234/25880/10443/50840/166785/91151/132949/28970/83448/55171/400506/57185/27030/55869/56339/23637/11128/84524/55285/23185/9906/221443/10780/80095/6302/4931/5356/84173/285855/55900/84498/79810/23112/7589/26048/23548/7586/55028/79876/343099/7508/23404/…
CHMP1B	44	-0.889902	-1.71978	0.00018708	0.103268	140	tags=14%, list=2%, signal=13%	1027/8848/3727/7538/28984/467
ZNF550	201	0.456798	1.56796	0.000201828	0.111409	1492	tags=36%, list=25%, signal=28%	56898/55109/84450/55729/55035/79830/57120/79692/7705/134359/2073/4946/79800/10902/4090/100129842/339500/79596/3796/29068/64766/132949/84636/7700/152926/23190/9988/340252/23398/23341/4891/7072/23637/53944/5289/55425/54799/80095/9330/89781/545/4436/64864/60684/10254/22978/25929/29899/22862/9868/5884/9025/84295/146198/90987/10198/55763/90957/22926/9331/57097/4594/55156/57337/55028/55726/55125/55632/…
ZNF439	124	0.525488	1.7066	0.000203349	0.112249	2205	tags=68%, list=37%, signal=43%	9840/84450/54482/55188/79830/1788/84307/54916/79800/80312/55719/4548/10521/2218/84874/3551/102723927/64766/9849/93627/28970/10230/100190939/55245/10788/11128/9906/22984/23269/57492/286467/10780/84320/202243/89781/9678/90673/55133/84899/5257/10198/326624/9331/6653/102723508/252983/117155/23181/54832/55779/84527/221264/57209/163131/79175/7582/7620/162963/1662/7625/57205/90624/7617/148213/55705/8476…
HMGN2	128	0.514992	1.70115	0.000212378	0.117233	935	tags=29%, list=16%, signal=25%	3925/7336/2079/5685/348235/23741/11157/9166/55110/86/128061/2287/1854/6119/6629/5928/25847/50809/387103/64710/54969/6726/5889/80145/84191/4190/10714/10428/10969/115106/151246/51002/7443/129831/51121/51241/10935
JRKL	143	0.486875	1.6083	0.000271205	0.149705	1016	tags=45%, list=17%, signal=38%	1781/55791/10240/9321/219402/7360/54482/8405/3155/23059/79830/55634/11340/93183/79607/64802/64172/79833/84307/55333/55737/10885/27332/54969/56986/4528/23091/55140/168451/101927288/11064/158234/51319/246184/25880/84869/10443/51028/91151/9453/93627/81562/9111/28970/65109/83448/84984/400506/57185/27030/55869/56339/54067/84524/23185/55425/80227/10780/63915/9994/51377/51103/84938/4931
BCL11A	114	0.525738	1.72737	0.000273081	0.150741	738	tags=27%, list=13%, signal=24%	7336/9978/29081/120534/9967/29087/5686/51076/5687/339229/10944/4707/51538/2287/440574/91612/10476/11340/55967/54948/54969/55153/131118/246184/81493/84081/122961/9789/9111/5688/115106
NRL	113	0.508684	1.67241	0.000290119	0.160146	1620	tags=53%, list=28%, signal=39%	10471/56652/8607/3661/6391/4817/10139/2021/84861/26995/80017/84875/9277/124401/1174/51368/23386/9894/1819/171568/80142/7343/6778/10445/1802/92960/22984/7918/11333/114044/80313/8602/84283/9136/23550/55735/11068/55846/10999/115708/51490/2068/83746/197407/79058/374920/8216/196483/2242/11094/5524/161424/55011/28960/7011/80347/80324/28955/22937/128272
ZNF599	70	0.591328	1.75083	0.000326998	0.180503	1925	tags=64%, list=33%, signal=44%	51147/9840/84450/439949/55188/57120/1788/64172/148327/54916/80312/100129842/84874/64766/11020/55578/55906/100506930/50485/23408/84320/9678/1479/25929/55900/84527/221264/57209/163131/7582/56242/162963/8505/7625/95681/153364/7617/84924/148213/55705/594/374900/55795/100131067/7629
ZNF613	229	0.423076	1.5555	0.000329842	0.182073	1550	tags=36%, list=26%, signal=28%	56898/55109/9321/85865/55035/147657/90317/57120/79692/7705/27332/134359/2073/6814/253143/4863/10902/100129842/79738/160897/339500/79596/54908/57551/3796/387032/132949/7700/9988/340252/93973/7707/23398/23341/7072/23637/5289/54799/80095/23306/9330/178/64864/60684/5356/10254/22978/25929/4012/57459/22862/53981/5884/23080/9025/339318/90987/10640/23548/55763/26046/22926/55783/25998/57097/2957/4594/2221…
ZSCAN16	79	0.559065	1.73606	0.00037089	0.204731	1097	tags=30%, list=19%, signal=25%	56898/9321/55035/3454/79692/55737/2073/6814/10902/79596/10443/132949/7700/5001/340252/2635/7707/23637/5216/9325/60684/5356/10254/55599
AKAP8	270	-0.707147	-1.4579	0.000374382	0.206659	1151	tags=43%, list=20%, signal=36%	84285/10933/51441/5929/23633/6198/100652748/10520/6780/1399/255919/3954/6651/10042/23168/55054/80264/5717/56902/60493/23435/163590/124491/54556/9329/65117/1659/7090/140901/4848/25977/59348/26092/5007/57062/55294/7695/23215/7110/7109/9585/64795/3313/64376/91746/56681/5927/57708/29072/23119/29115/2803/91833/25897/25778/6047/9689/7296/23160/26036/24144/9698/257415/9685/55206/988/143384/5504/64112/55…
ZNF251	199	0.42511	1.48223	0.000390026	0.215294	1820	tags=45%, list=31%, signal=32%	55109/51351/1021/729082/7155/5994/23097/80208/134359/2073/79800/100129842/10521/79738/2218/339500/84874/3551/84436/143/29068/64766/9988/92255/100190939/10444/23341/7072/5289/6654/8994/9831/23269/57492/81571/54799/80095/9330/89781/63894/23506/64864/60684/22978/57470/22862/9868/5884/9416/146198/84899/9924/22880/23382/84219/23647/55156/23199/144245/55125/23338/9656/55687/23181/56916/55311/147991/849…
ZNF557	442	-0.680108	-1.40038	0.000412814	0.227873	817	tags=32%, list=14%, signal=30%	56990/10933/51441/5929/1022/23633/6198/100652748/126070/10520/55870/6780/255919/79818/10920/84975/6651/51503/10270/9134/10042/148268/79577/23168/80264/5717/51026/26049/11066/124491/66036/6774/116842/54556/6500/1659/101927275/7090/29093/1060/4848/58526/59348/283635/57062/148423/84851/7695/23215/7110/51335/165324/9585/64795/3313/51340/51163/6775/56681/5927/57708/23528/9821/81572/23119/29115/2803/91…
PURA	38	0.708048	1.95358	0.000413059	0.228009	1142	tags=55%, list=19%, signal=45%	7336/5686/7265/64928/8405/440574/93183/79833/29082/54969/158234/51319/79717/152100/9789/8195/80227/51377/51103/348995/7349
ESRRA	155	0.462556	1.58821	0.000415189	0.229184	1493	tags=45%, list=25%, signal=34%	8125/8607/100507463/3661/115761/245812/116985/6391/80072/4817/79415/6195/10139/2529/3059/10113/84948/90120/23313/79709/84861/84875/9277/124401/1174/84304/78996/81844/9894/171568/80142/124790/2582/6778/92960/7918/11333/6302/7094/81704/114044/8602/84283/51006/23550/11068/7409/84727/10999/89849/51490/5863/79058/8629/197342/374920/8216/196483/2242/5905/11094/80198/55911/5524/161424/28988/29911/6810/2…
KDM8	146	0.476856	1.59447	0.000419299	0.231453	1450	tags=42%, list=25%, signal=32%	56652/84062/1788/55131/100874110/84656/9570/3551/84861/8558/9277/91151/124401/81844/400506/57185/55738/23386/1819/171568/7343/55245/11128/9906/80153/10445/84909/22984/23269/84276/10780/56919/114044/8602/84283/51006/57470/55735/55846/84173/9416/51490/83746/339318/84498/90987/197407/124454/7589/197342/55192/26048/374920/22880/54944/84219/7508/23404/55687/23181/161424
ZNF394	193	-0.735799	-1.4982	0.000471476	0.260255	762	tags=36%, list=13%, signal=33%	64795/79571/91746/56681/5927/57708/23528/25909/29115/91833/8552/55096/25778/5936/23160/26036/24144/9685/55206/988/143384/5504/64112/79183/6924/1655/25948/5966/80314/23210/56262/10286/57862/6397/84132/8774/50640/51447/80219/84146/11103/9584/105372481/1983/1195/5049/23670/51710/254170/56829/1998/51430/123720/5515/7561/163049/144108/6932/79753/79139/2117/79939/64061/6018/27342/51526/51646/10049/5111…
ZNF10	368	-0.688009	-1.43561	0.000518515	0.28622	1083	tags=40%, list=18%, signal=35%	27125/10006/6651/9861/168374/55922/148268/79577/23168/80264/10725/91120/26224/22894/80818/163590/5144/53371/65117/9818/84640/5290/51562/9655/3612/1060/10059/55660/4848/9451/23169/262/59348/26092/5007/114883/57062/10276/55773/7695/23215/6049/7110/245711/147339/165324/166968/64795/3313/51340/64376/51163/91746/51755/8533/5927/29072/9821/7693/226/6875/25909/55818/1964/23469/55096/55854/25897/122830/6…
TFAP2E	123	0.494982	1.62526	0.000556897	0.307407	1292	tags=39%, list=22%, signal=31%	56652/8607/3661/100874110/4817/10139/2529/146712/84861/80017/84875/8558/80152/9277/641339/124401/51368/11020/29125/80279/81844/55657/23386/171568/124790/7343/55245/92960/22984/4294/84276/7918/11333/6302/114044/84283/3712/23550/7409/55846/84173/9761/51490/197407/197342/374920/8216/54944
KDM4C	190	0.445563	1.54345	0.000560662	0.309485	1372	tags=24%, list=23%, signal=19%	83658/3692/729082/7514/3181/472/7155/8832/6635/23097/80208/2073/55719/10521/2218/57551/143/9849/1340/9988/139818/23272/92255/5289/23269/11316/285527/65981/1350/81627/81704/23506/545/4077/60684/4012/91754/23080/57560/5257/23317/10198/22880/2957/23199/55125
ZHX2	73	0.582902	1.75828	0.00057496	0.317378	685	tags=26%, list=12%, signal=23%	9978/168537/9321/9967/51076/8405/10944/3454/128061/51538/84159/91612/11340/285331/23091/168451/10443/84081/9789
KLF4	39	-0.891694	-1.71143	0.000610833	0.33718	443	tags=38%, list=8%, signal=36%	114548/388/79180/9935/10221/7262/117289/7431/1848/4000/91663/1843/7538/28984/10365
ZNF117	107	0.5339	1.68723	0.000617154	0.340669	1581	tags=44%, list=27%, signal=33%	4602/1021/729082/7514/7155/23097/80208/79800/10521/2218/83852/4144/64766/1385/9849/25913/9988/100190939/7072/202309/23269/54799/84320/9330/151613/545/60684/9678/22862/57560/146198/90987/84899/10198/9924/8615/55125/27340/7006/55779/56916/147991/64921/54585/80067/7582/56242
CEBPD	12	-0.97056	-1.64408	0.000718488	0.396605	61	tags=50%, list=1%, signal=50%	388/10370/1848/7538/28984/10365
ZNF416	184	-0.732092	-1.5144	0.000816906	0.450932	1209	tags=52%, list=21%, signal=43%	79803/51104/23394/55671/115509/284309/10116/79862/57711/54880/54861/126070/149371/79666/168374/9883/148268/55054/26224/22894/80818/571/124583/90580/9329/7159/10605/84640/9655/121665/7189/140901/10838/23169/85365/5007/1408/1859/7695/6049/23219/166968/55175/51340/51163/51755/7994/7458/7693/55269/55818/55030/122830/7296/171023/7326/11236/54915/3839/6924/25948/51552/163051/5971/160760/10172/6670/8082…
ZNF571	419	-0.673801	-1.38411	0.000892988	0.492929	919	tags=28%, list=16%, signal=26%	84640/5290/26959/51562/4204/9655/3612/10059/55660/4848/9451/23169/253260/59348/5007/114883/57062/55279/55773/9762/7695/23215/6049/7110/245711/147339/165324/166968/7403/116254/51340/64376/91746/7994/5927/29072/9821/153222/7693/79612/226/25909/55818/283624/23360/23469/91833/122830/10208/4780/2956/26036/9698/5520/56605/988/440026/55186/55031/149041/58490/23011/25948/5966/163051/10172/8087/151987/230…
ZNF529	466	-0.654145	-1.3462	0.00104007	0.574118	972	tags=36%, list=17%, signal=33%	5144/571/9329/7159/53371/65117/9818/10605/84640/3189/5290/26959/51562/3845/9655/7812/7189/3612/10059/55660/9451/23169/253260/262/25977/5007/114883/94241/219333/10276/55773/51118/1859/7695/23215/6049/7110/147339/23219/166968/7403/55175/51340/64376/51163/91746/51755/7994/29072/9821/153222/7693/79612/226/6875/25909/55818/283624/23360/1964/23469/27107/84945/55854/25897/122830/65986/10208/5701/7844/26…
ATF3	12	-0.960719	-1.66126	0.00107393	0.592809	117	tags=100%, list=2%, signal=98%	7316/23645/5054/5734/8848/1316/3725/1843/7538/28984/10365
ZNF490	100	0.518379	1.70365	0.00113738	0.627832	1477	tags=39%, list=25%, signal=30%	55109/9321/55035/90317/57120/7705/27332/134359/2073/253143/4863/10902/339500/9453/132949/152926/23398/23341/23637/53944/5289/11128/11196/80095/4931/5356/10254/27042/5884/9025/10617/10198/26046/7586/55028/55125/84437/80205/57695
SP110	30	0.727759	1.88649	0.00121002	0.667929	792	tags=47%, list=13%, signal=41%	54739/54809/4939/219285/3428/3454/55601/80342/94240/4938/2533/152926/63901/151636
ZKSCAN4	54	0.615117	1.77974	0.00130605	0.720941	1350	tags=50%, list=23%, signal=39%	55791/56652/5987/90317/79692/55131/7705/2073/221120/2188/389119/93973/23341/55245/11128/9831/80153/10780/63894/25929/55813/9025/285855/7589/80345/85363/55028
HMGN3	93	0.506777	1.6539	0.00143556	0.792431	804	tags=30%, list=14%, signal=26%	29081/5685/7979/219402/55319/60492/55110/2287/51019/6629/55967/6635/10799/509/26157/80145/131118/65008/2958/4190/10428/9141/9111/10969/51642/115106/10069/51002
ZNF709	382	-0.663407	-1.36976	0.00146345	0.807825	1040	tags=39%, list=18%, signal=35%	148268/79577/23168/80264/10725/91120/26224/22894/9798/80818/23435/163590/151056/9329/53371/9818/10605/84640/5290/26959/51562/3845/9655/7189/10838/55660/4848/9451/29967/23169/253260/85365/59348/5007/114883/10276/55773/1859/7695/23215/59345/6049/7110/245711/147339/8874/165324/166968/116254/64376/91746/51755/7994/29072/23528/9821/26051/7693/79612/25909/55818/23360/23469/91833/122830/10208/7844/2956/…
HMGN4	42	0.66314	1.85347	0.00162911	0.899268	709	tags=29%, list=12%, signal=25%	3925/60592/84661/27430/23741/10282/64431/55634/55435/160897/285343/401397
KLF2	18	-0.930022	-1.66991	0.00167876	0.926674	318	tags=56%, list=5%, signal=53%	10221/7846/8480/1263/10370/1848/1843/7538/28984/467
ZNF331	54	-0.847401	-1.68253	0.0016927	0.934373	513	tags=39%, list=9%, signal=36%	84124/5966/10286/57862/50640/51276/80219/84146/22835/9584/5500/23670/51710/10745/2117/79939/64061/81689/5718/94056/1390
ZNF134	490	-0.643911	-1.32509	0.0018132	1	1076	tags=41%, list=18%, signal=36%	10006/6651/149371/79666/168374/55922/4790/148268/23168/55054/80264/10725/91120/26224/22894/9798/80818/60493/163590/571/9329/7159/53371/65117/9818/10605/51143/84640/3189/5290/26959/51562/3845/9655/7812/7189/140901/3612/10838/9451/901/23169/262/85365/59348/5007/114883/94241/57062/10276/1859/7695/23215/59345/6049/7110/245711/147339/165324/166968/146434/3313/55175/51340/64376/51163/91746/51755/7994/7…
ETV3	450	-0.655466	-1.35394	0.0018703	1	803	tags=29%, list=14%, signal=27%	7695/23215/7110/245711/8874/165324/64795/7323/3313/91746/56681/7994/5927/57708/29072/84933/23528/9821/25909/29115/2803/91833/8552/55096/1452/25778/6047/5936/387082/26036/55041/24144/9698/1778/9541/9685/55206/988/143384/440026/55186/55031/149041/6924/58490/10658/84124/26043/23011/25948/5926/5966/23210/163051/5611/54469/23036/22919/57862/6397/23099/84132/8774/9766/54439/50640/51276/142891/51447/164…
ZNF706	358	-0.670991	-1.37456	0.00190924	1	1272	tags=44%, list=22%, signal=37%	285237/5286/3930/10001/55454/115426/55432/10087/339745/6627/2744/83608/5495/6882/157769/4690/9643/8491/5277/56990/5411/6198/2553/58517/255919/80232/10006/9337/9861/4928/54793/3344/10042/23168/1977/5717/51026/26224/22894/9798/92345/23435/25949/53371/65117/9818/3189/5290/26959/51562/3845/7189/1060/10059/55660/4848/253260/25977/54918/55279/55773/148423/8036/23215/6049/7110/10308/147339/8874/7323/643…
ZNF48	90	0.528334	1.66727	0.00205677	1	1389	tags=46%, list=24%, signal=35%	56652/84062/8607/374403/1788/100874110/4817/9570/9277/91151/124401/81844/1819/171568/124790/7343/11128/9906/80153/10445/92960/22984/7918/11333/6302/114044/80313/8602/84283/51006/55846/51490/83746/7589/197342/26048/374920/54944/84219/5905/23404
ZBTB10	323	-0.682008	-1.41495	0.00205752	1	972	tags=39%, list=17%, signal=34%	5144/571/9329/7159/65117/9818/83452/10605/51143/84640/3189/5290/9655/7812/7189/3612/9451/901/23169/26092/5007/10276/1859/7695/6049/7109/147339/166968/55175/64376/91746/51755/7994/29072/22992/7693/55269/6875/25909/55818/90268/23469/27107/9825/25897/122830/10208/7844/2956/171023/26036/10678/11236/9685/988/51444/126298/55186/54893/3839/168850/25948/51552/10672/9318/160760/8087/151987/6670/80829/2291…
ZFP1	497	-0.637043	-1.30903	0.00209041	1	1083	tags=39%, list=18%, signal=35%	2744/7305/5495/147694/390980/6882/157769/51104/23394/10988/55671/4690/284309/10116/8491/57711/9412/6198/54861/126070/10520/2553/27125/10006/9337/6651/149371/79666/168374/5597/54793/148268/79577/80264/10725/51026/26224/22894/80818/92345/571/9329/53371/9818/10605/84640/3189/5290/26959/51562/3845/9655/7812/7189/3612/10059/55660/9451/23169/253260/262/59348/26092/5007/114883/94241/219333/55279/55773/8…
GMEB1	206	-0.703255	-1.44389	0.00220404	1	1124	tags=42%, list=19%, signal=35%	23633/54861/100652748/375035/1399/79818/27125/6651/10270/4790/148268/23168/55054/11021/9798/163590/6774/9329/1659/10838/51061/5007/1408/59345/7109/165324/79571/51755/7994/7458/29072/22992/7693/23119/90268/29115/9807/23774/91833/25778/6047/7296/171023/24144/9698/1778/54893/6924/58490/26043/5966/5971/80829/57403/51343/1453/22850/550631/84132/9766/85364/54439/142891/80204/2033/164/81873/11214/2673/2…
ZNF35	415	-0.659265	-1.3635	0.00231471	1	1227	tags=42%, list=21%, signal=36%	2744/7305/5495/147694/390980/6882/157769/23394/55671/4690/284309/10116/79862/8491/57711/9412/7871/6198/54861/126070/10520/54882/27125/23186/149371/55922/54793/4790/9883/403341/148268/23168/10725/91120/26224/22894/9798/80818/60493/571/9329/7159/53371/9818/10605/84640/5290/26959/9655/7812/121665/7189/140901/3612/10059/10838/9451/23169/5007/114883/219333/10276/55279/1859/7695/23215/59345/6049/7110/2…
THAP7	66	0.58221	1.71778	0.00234655	1	1136	tags=42%, list=19%, signal=35%	51728/138428/54939/245812/55954/6183/64978/55111/10775/374291/26995/9054/55168/51368/84304/790955/5373/10101/65094/55695/1819/10445/26589/11264/11313/57325/11068/23583
YY1	490	-0.63974	-1.31045	0.00260838	1	1124	tags=43%, list=19%, signal=38%	23633/54880/6198/54861/100652748/54882/6780/8030/1399/80232/27125/23186/10006/9337/6651/149371/79666/10270/168374/55922/5597/10042/9883/23168/55054/80264/10725/51026/26224/22894/9798/80818/92140/60493/51573/571/9329/7159/53371/65117/9818/1659/10605/84640/3189/5290/26959/3845/9655/7812/121665/7189/140901/10059/55249/55660/9451/23169/253260/262/26092/5007/219333/9673/55279/55773/8036/51118/9762/185…
SETD3	128	0.46002	1.55968	0.00269594	1	1535	tags=38%, list=26%, signal=28%	4602/55109/10928/729082/7514/7155/7520/23097/102/8417/55435/83852/57551/143/9879/25913/139818/23272/7072/6654/9831/55197/92241/23306/63894/23506/60684/22978/53981/9416/23080/140609/5150/23317/10640/2965/466/23382/5532/25998/8615/57486/51809/6197/57380/64921/84343/80067
SOX4	102	0.494823	1.56963	0.00276375	1	1091	tags=29%, list=19%, signal=24%	6742/29081/9967/7360/5687/126382/2287/23059/91612/11340/54948/55333/54969/131118/4331/51319/246184/50840/81493/9789/5688/27030/79741/6835/286467/79921/125061/6632/81890/348995
ZSCAN22	52	0.582834	1.69034	0.00295099	1	1552	tags=60%, list=26%, signal=44%	56652/79607/84307/253143/9570/25880/641339/91151/81844/57185/55245/11128/9906/9831/80153/22984/10780/10940/9416/339318/7589/222236/374920/7586/55028/7508/23404/55687/93594/9276/79175
CENPBD1	56	0.586567	1.68552	0.00295652	1	1764	tags=64%, list=30%, signal=45%	4720/267002/8405/64110/93183/1376/84948/9477/25880/2188/387032/81562/84984/11128/26589/3712/57325/10201/339318/84498/7589/55192/7586/29960/3140/7508/51058/8019/6041/131965/84912/55128/144233/51665/150383/80308
EZH1	213	0.385587	1.38303	0.00318999	1	1463	tags=37%, list=25%, signal=29%	9321/55035/23780/8405/23059/472/79607/285331/80342/84307/55737/27332/253143/4548/10902/100132707/11064/158234/84869/10443/81493/115817/143/7700/80279/81844/152926/28970/83448/63901/55171/57185/27030/23398/56339/4891/23637/11128/84524/5216/23185/9906/80227/10780/91526/9994/256987/1460/9325/202243/89781/4931/90673/1606/348995/55599/8481/84173/51380/84498/79810/23112/387921/222236/7586/25957/6653/45…
ZFPM1	71	0.519512	1.57073	0.00338246	1	1117	tags=31%, list=19%, signal=25%	29985/9967/8328/5687/440574/10476/55967/84964/81493/9829/9789/6794/5688/10444/81558/6654/2812/5694/23506/55833/10025/23648
PRMT6	34	0.660663	1.69218	0.00346303	1	1166	tags=56%, list=20%, signal=45%	23741/51645/86/64110/1376/28957/10885/113829/54919/55776/9477/2188/142/7343/57470/57325/27042/55735/83746
JADE1	379	-0.651774	-1.34644	0.00346625	1	1245	tags=41%, list=21%, signal=34%	11143/6430/29028/63906/7305/80124/147694/8693/390980/23394/55671/284309/57711/9412/84285/7871/51441/5929/6198/54861/126070/10520/54882/58517/1399/81875/6651/149371/10270/168374/10042/148268/79577/55054/26224/22894/60493/266812/9329/53371/22853/65117/1659/84640/55270/3189/9655/140901/3612/1060/10059/23169/25977/26092/5007/94241/57062/84851/7695/23215/6049/147339/166968/9585/64795/3313/55175/51340/…
ZNF823	333	-0.658733	-1.35684	0.00377416	1	912	tags=29%, list=16%, signal=26%	5290/51562/3612/1060/10059/55660/4848/23169/253260/262/59348/114883/55773/8036/51118/7695/6049/7110/165324/3313/116254/51340/51163/5927/57708/9821/153222/7693/23469/2803/84945/55854/122830/51669/10208/5701/9689/26036/4189/9541/5520/56605/988/55602/440026/55186/55031/149041/6924/5926/80314/163051/10172/8087/23036/9774/22919/7673/64225/10286/3799/8774/54764/54439/51276/84146/23198/9584/105372481/19…
ZNF879	82	0.533697	1.60918	0.00390662	1	2353	tags=71%, list=40%, signal=43%	55109/147657/57120/80208/134359/55719/4548/339500/84436/57551/9849/9988/23272/92255/23341/55578/23269/54799/80095/178/545/60684/10254/5884/55900/84498/146198/55763/25998/55125/91801/84527/64921/80067/56242/255520/104472715/2186/51479/158431/65251/7627/64418/9786/9135/146050/55717/7576/150709/65250/889/257218/9202/4087/9950/7769/57508/57534
LBX2	51	0.580721	1.66106	0.00408993	1	1048	tags=35%, list=18%, signal=29%	10471/8607/100507463/79064/6391/100874110/80072/4817/10139/1174/171568/124790/92960/7918/11333/6302/114044/84283
PHC1	84	0.495578	1.5137	0.00443617	1	1852	tags=54%, list=31%, signal=37%	695/1788/148327/408/84874/3551/124401/23357/142/23386/7343/22984/7318/57492/50485/56919/23408/9875/80313/8602/57506/91754/115708/51490/84532/9744/326624/8216/54944/26259/80317/5198/489/50861/55643/22937/57326/7625/110806298/64773/9187/5892/10013/9727/84167
MAFF	103	-0.750403	-1.52281	0.00447588	1	310	tags=21%, list=5%, signal=21%	79720/26524/80149/415116/9929/90007/9308/51320/1847/5187/23135/129807/5142/79647/64651/9441/51307/7798/8013/2355/1844/3164
BCL6	30	-0.865858	-1.63571	0.0052957	1	539	tags=40%, list=9%, signal=37%	7277/84957/8676/114548/79180/9935/117289/3142/1263/8178/1848/7538
CHAF1B	42	0.62288	1.75565	0.00542245	1	388	tags=14%, list=7%, signal=13%	3925/348235/11198/86/387103/64710
ZNF551	267	-0.680525	-1.40815	0.00580362	1	1229	tags=45%, list=21%, signal=38%	63906/2744/7305/80124/147694/8693/390980/23394/284309/79862/57711/9412/51441/5929/6198/54861/100652748/126070/10520/375035/1399/79818/6651/149371/148268/55054/80264/91120/22894/80818/60493/163590/9329/1659/5290/9655/10838/23169/59348/5007/94241/57062/7695/23215/59345/245711/147339/165324/64795/3313/79571/55175/51755/7994/51388/29072/23528/7693/6875/25909/55818/91833/55096/122830/25778/65986/2956/…
SP140L	28	0.666111	1.64904	0.00607768	1	1178	tags=50%, list=20%, signal=40%	3431/55035/54482/129531/79830/57120/8417/9039/64766/63901/8773/545/55133/146198
ZNF773	289	-0.664372	-1.37188	0.00609703	1	1240	tags=40%, list=21%, signal=34%	10087/23014/6627/83608/7305/80124/147694/390980/4690/81555/115509/284309/79862/56990/51441/5929/1022/23633/100652748/126070/10520/2553/6780/255919/79818/90411/10006/4928/10042/148268/79577/23168/80264/5717/9798/60493/163590/6774/266812/53371/1659/5290/55905/1060/55660/4848/58526/59348/57062/7695/59345/7110/8874/165324/64795/3313/116254/56681/5927/23528/7693/10978/55030/23774/91833/1452/122830/516…
ZNF780A	85	0.48952	1.5157	0.00666415	1	1875	tags=61%, list=32%, signal=42%	55188/472/84307/80208/27332/253143/166378/55719/4548/11064/158234/10443/57551/9581/143/641339/28970/83448/23272/8790/11128/84909/23269/91526/9994/178/81704/545/84173/23080/84498/222236/55763/7586/3140/55125/7508/7294/54832/92106/6041/163131/23345/80267/92797/11216/51479/158431/55471/6619/728558/64418
NFYA	70	0.531566	1.60292	0.00680759	1	1875	tags=57%, list=32%, signal=39%	55188/5378/23097/10885/55719/4548/2218/64766/55251/1385/9666/9849/93627/23272/7072/55578/54677/23269/151613/545/25929/27042/79810/5257/10198/6059/79876/27340/252983/84527/221264/163131/8505/57696/51479/8886/55705/7627/1121/64418
CHAF1A	129	0.437105	1.45548	0.00688295	1	1614	tags=43%, list=27%, signal=32%	10471/56652/8607/3661/3181/203068/84656/54919/10607/84861/142/8243/10454/9894/4176/7343/22984/4294/7374/5709/9875/348180/8602/23550/55735/7409/7112/9761/9416/115708/51490/83746/4172/84532/124454/374920/8216/22880/84219/4175/5905/23404/9656/55687/5524/56931/23277/161424/5198/84988/7011/23310/23450/80324/22937/4174
ZNF829	270	-0.668767	-1.37051	0.00894642	1	1232	tags=41%, list=21%, signal=34%	29028/2744/7305/147694/390980/6882/10988/55671/284309/57711/9412/84285/5929/6198/10520/58517/6651/168374/148268/79577/80264/51026/91120/26224/22894/92345/266812/53371/9818/84640/5290/1060/10059/55660/23169/59348/26092/55773/7695/23215/6049/7110/166968/9585/64795/51340/64376/51163/91746/57708/9821/153222/79612/226/25909/1964/2803/84945/25897/122830/10208/9689/26036/9541/988/440026/5504/55186/55031…
ZBTB12	177	0.388081	1.32266	0.00956165	1	1270	tags=35%, list=22%, signal=28%	10471/8607/10922/3661/8717/113655/729440/6391/148327/4817/10139/150223/3276/79763/8086/408/10607/2968/2021/5833/84861/80017/84875/80152/124401/1174/55657/4221/10454/9894/171568/80142/29920/7343/6778/1802/4294/51337/50485/9875/7094/51112/80313/8602/9136/23550/57506/10999/91754/89849/115708/51490/2068/84532/5863/124454/79058/9924/11235/374920/8216/22880
MYBL1	37	0.597023	1.60353	0.0099898	1	2017	tags=76%, list=34%, signal=50%	57120/472/4863/55719/1385/23272/92255/64863/9994/178/151613/545/11278/64395/5884/55900/2957/57337/11119/84527/8505/80267/8886/1121/22832/9786/29929/56890
NFE2	39	0.607702	1.6255	0.0106179	1	1240	tags=46%, list=21%, signal=37%	2193/9973/8328/25853/100505783/2639/54903/847/6888/54058/8045/8818/81889/25996/3145/10098/6563/222236
GTF3A	12	0.797879	1.66975	0.0111752	1	391	tags=25%, list=7%, signal=23%	9315/100188893/6902
ZNF256	248	-0.657558	-1.35577	0.0116178	1	1120	tags=44%, list=19%, signal=37%	6198/100652748/126070/10520/2553/1399/27125/10006/6651/148268/23168/10725/91120/22894/9798/80818/60493/23435/163590/9329/53371/9818/10605/5290/26959/51562/9655/7189/9451/23169/59348/5007/57062/10276/7695/23215/59345/6049/7110/245711/147339/165324/166968/64795/64376/91746/7994/9821/7693/25909/55818/91833/122830/2956/7551/26036/9698/64218/988/126298/55186/10342/6924/58490/26043/25948/5966/163051/80…
JUN	13	-0.91948	-1.61059	0.0121336	1	440	tags=62%, list=7%, signal=57%	388/282991/10221/7316/23645/9592/1843/467
ATF6	204	0.372098	1.34693	0.0131887	1	1542	tags=32%, list=26%, signal=25%	9321/1965/11198/55035/79692/7520/7705/55737/27332/2073/6814/253143/4863/10902/4090/55055/79596/3796/29068/9453/132949/7700/23190/340252/7707/23341/7257/23637/53944/5289/55197/11196/55425/9325/57187/9330/4931/60684/5356/10254/22978/4012/57459/6605/53981/2182/9025/285855/84295/10640/23548/57097/4594/222194/55028/55726/55632/84437/126003/80205/57695/10097/153396/23390/9276/8504
ZNF540	146	-0.697559	-1.43818	0.0134104	1	655	tags=16%, list=11%, signal=15%	8552/387082/26036/24144/440026/79183/84124/163051/100507433/10172/23036/8774/51276/22835/9584/105372481/23670/51710/10745/7561/163049/2117/10049/55422
SOHLH2	47	0.544972	1.54977	0.0134789	1	2008	tags=68%, list=34%, signal=45%	60526/2618/93627/10969/83448/1355/221443/23556/58477/56912/10827/26275/8891/252983/134145/10111/89978/145389/79053/1662/90624/401207/57150/594/285753/100131067/34/10419/84319/84140/10056/1207
E2F3	339	-0.631135	-1.29864	0.0135666	1	1152	tags=39%, list=20%, signal=33%	9412/56990/51441/1022/23633/6198/54861/100652748/126070/55870/2553/6780/1399/90411/10006/6651/4928/10042/79577/23168/80264/5717/9798/60493/23435/163590/124491/6774/53371/1659/5290/55905/1060/55660/4848/29967/58526/59348/57062/54918/7695/23215/59345/7110/245711/147339/8874/165324/64795/3313/56681/5927/57708/29072/23528/9821/81572/7693/29115/55030/2803/91833/55096/1452/122830/25778/6047/7296/7551/2…
ZNF132	48	0.548509	1.51792	0.013778	1	1852	tags=62%, list=31%, signal=43%	56652/80208/3551/84861/124401/81844/23386/55245/9906/9831/80153/22984/4507/9875/91754/9761/22880/54944/84219/91749/161424/80317/79175/23450/7694/9187/5892/10013/79943/84167
TIGD3	18	-0.888976	-1.58257	0.0142217	1	432	tags=61%, list=7%, signal=57%	57649/85364/51276/79720/49854/56270/9929/51320/129807/79647/8013
ZNF615	491	-0.612068	-1.26066	0.0150355	1	1120	tags=35%, list=19%, signal=31%	6198/54861/126070/10520/54882/8030/80232/27125/23186/10006/149371/9861/79666/168374/5597/54793/148268/80264/10725/51026/26224/22894/80818/571/9329/7159/53371/9818/10605/84640/3189/5290/26959/3845/9655/7812/7189/140901/3612/10059/55660/9451/23169/253260/59348/26092/5007/114883/22936/219333/55279/55773/8036/51118/1859/7695/23215/6049/7110/10308/147339/5537/23219/166968/7403/55175/51340/64376/51163/…
TCFL5	134	0.40729	1.35848	0.0156033	1	1653	tags=40%, list=28%, signal=30%	4602/1021/29901/23097/54919/10607/2218/83852/3551/84861/84875/9879/23357/6794/4221/10454/23272/7343/4294/51337/9875/51112/23506/57470/23550/23171/10999/91754/9416/84532/90987/5863/5150/8216/22880/23382/5532/54956/9656/57486/26259/23277/55311/2733/5198/64921/7023/80067/55643/7024/80324/22937/8425/57326
ZNF77	59	0.52401	1.55857	0.017344	1	1853	tags=64%, list=31%, signal=45%	85865/79830/79692/7705/253143/10902/339500/79596/387032/9453/7700/340252/7707/23341/23637/11128/5356/10254/9025/339318/84498/7589/23548/80345/7586/55028/7508/84437/84527/9276/56242/55094/54925/57147/84924/65251/55471/7627
IRF7	13	0.755033	1.64744	0.0174615	1	518	tags=38%, list=9%, signal=35%	54739/4939/3430/4938/55337
TFEB	71	0.495461	1.50575	0.0178467	1	671	tags=23%, list=11%, signal=20%	822/1628/124460/64110/10287/116985/79415/6195/23596/1445/10113/11344/6404/1512/23313/84304
ZNF775	22	0.662279	1.5907	0.019875	1	1684	tags=73%, list=29%, signal=52%	10922/6480/132001/9546/135293/123355/4221/51466/55116/100188949/54956/7023/6666/7625/95681/9203
ZNF267	435	-0.614295	-1.26227	0.0223792	1	919	tags=34%, list=16%, signal=31%	84640/5290/26959/3845/7812/7189/3612/1060/10059/55660/4848/9451/253260/59348/26092/54790/54918/55279/55773/8036/1859/7695/23215/6049/7110/245711/147339/5537/23219/166968/7323/7403/51340/64376/91746/3459/56681/7994/5927/57708/29072/9821/153222/79612/25909/55818/23360/23469/2803/91833/84945/55096/55854/25897/122830/10208/5701/4780/9689/57590/55041/4189/9541/3156/5520/51164/988/9107/55602/440026/551…
ZNF641	55	0.527923	1.54991	0.0230251	1	1176	tags=38%, list=20%, signal=31%	3295/55188/80208/54916/10521/2218/3551/22900/143/55106/9831/6778/7094/81704/127428/23506/4077/23550/57506/91754/84498
YEATS4	83	0.457673	1.4324	0.0238366	1	591	tags=16%, list=10%, signal=14%	3925/60592/348235/1854/11335/64431/6629/5928/134510/51318/6726/55055/55166
MXD3	78	0.470015	1.45012	0.0246285	1	1479	tags=44%, list=25%, signal=33%	100507463/126382/79064/116985/80072/4817/6195/2529/55111/3059/11344/84304/171568/124790/10005/3611/92960/7918/11333/6302/114044/84283/29095/11068/84727/84173/197342/55192/196483/55911/54732/161424/100874323/28988
TSPYL2	270	-0.634116	-1.3211	0.0252016	1	819	tags=31%, list=14%, signal=28%	55773/148423/9762/23215/6884/7110/245711/8874/165324/91746/56681/7994/5927/29072/9821/25909/29115/23360/23774/91833/55096/122830/26036/24144/9698/5520/64218/440026/55031/58490/84124/26043/5966/80314/23210/23036/1453/57862/6397/84132/8774/54764/54439/51276/142891/51447/164/81873/23198/9584/105372481/1983/1195/2673/51132/57154/1499/23670/51710/10745/6867/56270/5903/25820/57602/56829/123720/163049/9…
ZNF71	57	0.51046	1.47702	0.0270015	1	1703	tags=54%, list=29%, signal=39%	29985/56652/65999/1788/148327/23357/142/9906/80153/22984/9875/57470/25929/9416/51490/90987/197407/26048/54944/348801/5518/84219/9278/489/55128/22937/57326/7625/9203/110806298/2909
TCF7	52	0.478756	1.37468	0.0297329	1	484	tags=19%, list=8%, signal=18%	3575/168537/51176/472/50852/4863/9402/2113/162394/1731
CENPA	17	0.693889	1.63528	0.0329226	1	581	tags=35%, list=10%, signal=32%	348235/51645/29901/1376/79733/83695
ZBTB49	104	-0.700301	-1.42842	0.0350318	1	1262	tags=47%, list=21%, signal=38%	205564/10001/10087/80124/390980/81555/284309/84285/56990/5929/10520/255919/10042/148268/79577/55054/80264/91120/6774/1659/5290/59348/6884/51340/51163/5927/10978/55030/23774/91833/25778/7551/24144/6924/58490/80314/23036/221178/54439/142891/105372481/29982/23670/6867/163049/79660/79753/9589/27342
TDRKH	46	0.524728	1.4812	0.035591	1	1425	tags=59%, list=24%, signal=45%	54865/5710/7265/2618/29082/84265/327/2224/11020/93627/8243/10069/4968/1355/1802/51103/3712/57325/10951/23583/79777/6117/26275/55163/8891/25814/134145
ZNF554	83	0.447128	1.3941	0.0360064	1	2444	tags=61%, list=42%, signal=36%	9840/1788/4548/100129842/339500/64766/23341/23637/11128/9906/22984/23269/54799/80095/89781/22978/25929/339318/90987/7589/84899/22880/348801/9881/23181/489/7620/57326/54925/158431/55705/84318/9135/90594/146050/100499483/55717/84911/166647/6777/65250/285349/26152/9202/57534/2787/4999/126017/100101467/706/55732
JUND	25	-0.839288	-1.54415	0.0371901	1	139	tags=16%, list=2%, signal=16%	10983/527/8531/10370
ZNF90	58	0.485228	1.36676	0.038274	1	718	tags=22%, list=12%, signal=20%	9978/29081/9967/4707/440574/91612/10476/55967/6717/246184/81493/9789/5688
ZNF471	72	0.463182	1.40035	0.0390948	1	2408	tags=76%, list=41%, signal=46%	55188/80208/79800/4548/100129842/10521/2218/84874/84436/64766/9666/9849/93627/23269/80095/84320/90673/57560/9924/252983/23181/54832/55779/84527/221264/147991/57209/163131/7582/162963/284443/7617/148213/84765/64418/101929147/7730/90594/100499483/55717/63892/84911/347344/150759/65250/889/285349/26152/257218/9202/57577/84460/57534/100101467/54467
EZH2	444	-0.604496	-1.24939	0.04	1	1144	tags=32%, list=19%, signal=28%	10933/7871/51441/5929/1022/23633/5411/6198/100652748/55870/58517/1399/51053/10920/10006/6651/9134/902/10042/79577/23168/1977/5717/23435/163590/124491/54556/6500/53371/65117/9818/5290/84324/1060/10059/55660/4848/58526/100653515/25977/57062/55773/7695/23215/59345/7110/7341/9585/64795/3313/64376/91746/56681/8533/5927/57708/23528/9821/79612/226/6875/25909/23360/2803/55096/55854/25897/1452/10208/5701/…
MTERF2	93	0.417781	1.29007	0.0400218	1	1508	tags=43%, list=26%, signal=32%	9321/64318/55035/472/285331/27332/4548/546/84869/10443/9666/9849/28970/83448/27030/6596/23398/55285/285527/65981/9994/57187/4931/545/90673/55599/8481/55900/51380/10198/222236/200558/79876/7294/55120/84527/221264/51174/10111/100131564
ACTR8	114	0.404187	1.35144	0.0409474	1	2477	tags=58%, list=42%, signal=34%	55109/7155/79692/2073/253143/143/3796/387032/23341/5289/529/54799/9325/9330/63894/60684/22978/128/4012/22862/9868/23080/2182/55763/22880/55028/55125/55687/6197/80067/9276/23291/23450/372/54925/57147/23361/23132/65251/55471/23503/3308/9135/79744/57614/55144/84961/146050/55717/55677/10985/64081/100128731/55209/514/192670/9950/283337/57508/57534/6872/84128/23369/5048/51135/84910
MTF1	94	-0.701908	-1.4264	0.042735	1	682	tags=23%, list=12%, signal=21%	29115/8552/25778/387082/5341/143384/7277/79183/597/5611/23099/64859/4814/51099/4084/6303/9709/801/5791/6648/10135/5329
GTF2IRD2	82	0.440476	1.36354	0.0447412	1	1656	tags=43%, list=28%, signal=31%	9321/9166/147657/134510/134359/4863/51574/84081/55251/23272/142940/7707/23398/23637/55285/8674/79886/91137/178/11278/10254/64395/6605/5884/55900/10199/23548/8545/64921/153396/54529/10463/255520/54664/157567
ZNF564	349	-0.60703	-1.24542	0.044955	1	1185	tags=36%, list=20%, signal=30%	55671/4690/284309/10746/79862/84285/56990/5929/1022/6198/54861/100652748/126070/10520/55870/54882/79818/6651/4928/10042/148268/79577/23168/80264/91120/22894/80818/66036/6774/1659/101927275/5290/26959/4204/1060/10838/23169/253260/59348/5007/114883/55279/84851/7695/23215/59345/6049/7110/51335/10308/147339/8874/165324/3313/51340/5927/29072/9821/7693/23119/55818/55030/23774/23469/2803/91833/55096/122…
MBD5	130	0.370799	1.24686	0.045157	1	1203	tags=26%, list=20%, signal=21%	9978/9967/114769/64928/126382/4707/440574/29796/79064/10476/55967/29082/10521/51647/2218/246184/4726/5721/81493/79717/9789/5688/81558/4696/57492/5694/23506/55833/29095/11068/51550/25824/90987/4773
SNAI3	21	0.621949	1.47244	0.0475137	1	633	tags=48%, list=11%, signal=43%	5880/79626/115761/1628/10287/1445/593/11344/6404/8045
HMGN5	19	0.667197	1.54223	0.0488972	1	1033	tags=42%, list=18%, signal=35%	30061/348235/64801/79071/6596/151246/25996/4436
ZNF697	16	-0.846798	-1.50329	0.0495208	1	668	tags=56%, list=11%, signal=50%	2077/9846/9595/10397/2683/6016/1263/2012/2355
ZSCAN18	38	0.498646	1.31386	0.0524999	1	2330	tags=66%, list=40%, signal=40%	100129842/84874/84436/123096/55738/57506/90987/84899/148103/84219/489/50861/57326/7694/400720/9727/23060/23005/90594/84911/6777/26152/140700/57573/26086
ZNF530	120	-0.672127	-1.37483	0.0537975	1	1197	tags=43%, list=20%, signal=35%	23394/55671/115509/284309/79862/84285/5929/6198/126070/10520/148268/55054/80264/91120/22894/80818/9329/1659/10605/5290/23169/59348/5007/7695/6049/165324/51340/51163/7693/10978/55818/55030/91833/122830/24144/988/6924/58490/25948/10172/7673/22850/54764/54439/51276/105372481/2673/56945/23411/51710/7561/79753
HLX	18	-0.840543	-1.49324	0.0546282	1	732	tags=56%, list=12%, signal=49%	55959/604/602/8676/382/114548/79180/1880/4783/7538
GFI1	71	0.454565	1.36469	0.0550037	1	347	tags=13%, list=6%, signal=12%	9978/9967/114769/4707/440574/91612/10476/55967/6717
ZFP3	14	0.675017	1.46231	0.055914	1	1774	tags=93%, list=30%, signal=65%	55188/55719/55776/79738/23272/92255/55900/84527/2733/56242/80267/4905/51479
ZGPAT	62	0.479409	1.40403	0.0606368	1	1204	tags=44%, list=20%, signal=35%	3661/55501/374403/6195/10139/2529/7535/146712/1731/124401/29125/123355/84941/54923/9894/1819/7343/4648/84276/23550/55846/115708/51490/83746/197407/201181/9744
TFEC	33	0.548948	1.48469	0.0614012	1	2316	tags=79%, list=39%, signal=48%	23097/79800/10521/79738/2218/4144/25913/139818/92255/202309/151613/57560/23317/8615/55779/9204/6565/1121/64418/3717/54431/57614/347344/889/9202/84460
ZIK1	143	-0.644234	-1.31787	0.0614583	1	1380	tags=46%, list=23%, signal=36%	81034/59343/348327/200933/56913/114659/51322/6832/10001/5495/147694/23394/55671/284309/8491/57711/126070/2553/148268/80264/91120/22894/80818/9329/53371/9818/10605/84640/5290/26959/23169/5007/7695/6049/165324/166968/51340/51163/7994/7693/55818/55030/23469/122830/7844/3839/23011/163051/10172/6670/7673/8027/22850/54764/5128/54439/51276/2673/49854/23411/9908/5903/139231/7561/221079/51762
ZNF438	32	0.529787	1.42578	0.0656573	1	2296	tags=75%, list=39%, signal=46%	80208/64747/22900/143/834/63901/23185/23317/6041/80267/1806/4905/57205/11216/10015/2595/1389/137835/120/26578/10559/54503/2140/7518
ARID3A	130	0.379848	1.21491	0.0676108	1	718	tags=18%, list=12%, signal=16%	9978/9967/114769/90480/339229/64928/126382/4707/51538/440574/5110/79064/91612/10476/55967/6717/400569/246184/81493/79717/152100/9789/5688
PHF13	37	-0.764158	-1.48139	0.0680908	1	889	tags=43%, list=15%, signal=37%	7159/140901/51061/5007/1408/7109/51755/22992/51343/2033/8493/51621/90007/9567/9819/10766
TSHZ1	25	0.594475	1.46542	0.0700171	1	1728	tags=52%, list=29%, signal=37%	9321/27430/4155/79596/7707/9025/23548/57097/222194/8019/55326/23023/54925
ZNF816	57	-0.72192	-1.44242	0.0710956	1	820	tags=26%, list=14%, signal=23%	7532/80723/59345/165324/7693/5295/56605/163051/10172/22835/57602/54900/163859/79939/7798
ZEB1	194	-0.620495	-1.29179	0.0720165	1	1050	tags=34%, list=18%, signal=29%	6780/58517/10006/54793/79577/23168/80264/51026/22894/53371/9818/5290/3845/1060/10059/55660/4848/253260/59348/55773/8036/7695/23215/7110/8874/116254/5927/57708/9821/153222/79612/23469/2803/84945/10208/9689/9541/5520/56605/440026/55186/55031/23011/5926/23036/9774/22931/8774/54439/142891/9263/5500/6309/23670/51710/10926/9908/5903/7561/163049/64645/1105/51762/23429/9262/6498
ZNF584	19	0.614594	1.43557	0.0742032	1	1601	tags=68%, list=27%, signal=50%	56652/90861/9477/23341/11128/9831/80153/9416/84219/55687/9276/23450/55128
RBSN	354	-0.583514	-1.19841	0.0759241	1	1124	tags=32%, list=19%, signal=27%	23633/6198/100652748/126070/10520/55870/255919/79818/6651/10270/10042/148268/79577/23168/55054/80264/5717/163590/6774/116842/54556/22853/65117/1659/101927275/7090/1060/25977/59348/57062/55294/84851/7695/23215/7110/51335/64795/3313/79571/51340/91746/56681/5927/57708/23528/23119/25909/29115/2803/91833/8552/55096/25897/25778/6047/387082/7296/7551/26036/24144/9541/55206/988/143384/440026/64112/79183/…
DNTTIP1	80	-0.693788	-1.36874	0.07828	1	457	tags=24%, list=8%, signal=22%	9774/11163/1654/50640/253943/9584/1983/1195/57018/80311/254170/51430/5515/144108/5930/6421/81689/51646/51119
ZBTB7A	168	0.346758	1.20375	0.0794467	1	803	tags=23%, list=14%, signal=21%	5696/29081/51023/5710/29087/5687/126382/2287/79064/23059/51019/10330/28971/10016/54948/55333/2639/55179/9570/131118/158234/246184/4830/9054/50840/81493/10428/152100/150684/79004/9111/10969/51642/400506/65094/10574/55869/170954/10436
ZNF689	84	-0.67357	-1.37229	0.079558	1	1370	tags=55%, list=23%, signal=43%	348327/200933/9529/11011/26205/11143/63906/80124/79803/51104/23394/55671/284309/10116/84285/54880/81875/149371/55054/80818/9329/1659/10605/29777/140901/23169/5007/51163/51755/7458/7693/10978/55818/23774/90441/122830/24144/54915/55602/6924/80829/22850/8204/85364/80204/79753
RORA	228	-0.611213	-1.26035	0.0804829	1	885	tags=31%, list=15%, signal=28%	1060/506/55660/253260/25977/59348/26092/55773/148423/23215/7110/9585/51340/64376/91746/6775/56681/5927/57708/9821/153222/79612/25909/2803/84945/25897/51669/26036/24144/4189/9541/143384/440026/5504/55186/79183/55031/149041/23011/5926/64282/54469/2908/23036/9774/54439/142891/80219/84146/9263/9584/105372481/1983/665/23670/10926/9908/5903/1998/51430/123720/163049/64645/1105/6932/79753/9589/6018/81689…
ZNF682	99	-0.66457	-1.33975	0.0820734	1	882	tags=32%, list=15%, signal=28%	10838/23169/59348/283635/7695/165324/116254/51340/7693/91833/122830/7551/26036/56605/5966/80314/163051/10172/23036/7673/22850/51276/22835/23198/105372481/23670/51710/5903/7561/79753/79939/7798
ZNF497	126	0.357192	1.20222	0.0837411	1	1480	tags=38%, list=25%, signal=29%	56652/8607/79064/100874110/80072/4817/84307/10139/100132707/9570/25961/50840/641339/91151/124401/81844/171568/124790/56339/10436/9906/84909/92960/22984/84276/7918/11333/6302/114044/8602/84283/81890/55846/51490/197407/201181/7589/197342/374920/5281/54944/14/80755/23404/93594/54732/161424/29911
ZNF699	394	-0.574325	-1.18386	0.0860861	1	1120	tags=39%, list=19%, signal=34%	6198/54861/126070/10520/55870/2553/255919/79818/27125/10006/6651/4928/10042/148268/79577/23168/55054/80264/10725/91120/9798/80818/163590/6774/5144/53371/22853/9818/1659/101927275/5290/26959/3845/7189/1060/9451/23169/253260/59348/5007/57062/55773/1408/9762/7695/23215/59345/6884/7110/245711/147339/8874/165324/79571/116254/51340/91746/6775/56681/51755/7994/5927/29072/23528/9821/26051/7693/10978/2590…
MLX	358	-0.584695	-1.21245	0.0870871	1	763	tags=31%, list=13%, signal=29%	55660/4848/58526/262/25977/59348/57062/22936/55773/7695/23215/7110/165324/9585/64795/7323/219855/3313/64376/91746/56681/57708/23528/9821/7693/226/25909/55096/55854/25897/122830/10208/9689/6675/7296/23160/26036/24144/9698/257415/9541/9685/55206/64218/988/5504/55186/55031/149041/84124/25948/5966/80314/163051/10172/8087/10171/23036/9774/7673/8027/10286/57862/6477/22850/84132/8774/54764/54439/50640/5…
ZNF669	72	-0.684049	-1.3732	0.0883352	1	1262	tags=61%, list=21%, signal=49%	205564/10001/63906/147694/390980/284309/51441/126070/79818/148268/23168/80264/163590/266812/59348/7695/165324/64795/79571/116254/51163/23528/7693/122830/7551/988/64112/6924/80314/163051/10172/22919/7673/9804/57862/22850/54439/51276/51447/7259/51710/7561/1997/79753
ARID3B	54	-0.704215	-1.38032	0.0901542	1	662	tags=46%, list=11%, signal=41%	91833/4097/55041/149041/58490/23011/5966/51343/23099/9766/142891/2033/164/57154/6867/51429/123720/163049/9043/1105/51762/79753/9819/27342/6498
XBP1	156	0.339628	1.13777	0.0940497	1	718	tags=18%, list=12%, signal=16%	7336/2079/9978/29081/9967/114769/64928/4707/128061/51538/440574/29796/5110/91612/10476/55967/6717/29082/51319/246184/10775/57570/81493/84081/79717/152100/9789/5688
ZNF329	263	-0.589119	-1.22018	0.0957661	1	1042	tags=32%, list=18%, signal=27%	9883/148268/55054/10725/91120/22894/80818/571/124583/9329/7159/84640/9655/7189/140901/10838/23169/5007/1859/7695/147339/166968/55175/51755/7994/7458/29072/22992/7693/55269/6875/55818/90268/9825/122830/65986/7844/2956/171023/11236/54893/6924/26043/25948/163051/160760/10172/6670/7673/6477/22850/84132/54764/1654/5128/85364/7799/51276/253943/80204/79720/8493/2673/51132/49854/23411/155435/51710/80311/…
ZFP30	298	-0.591589	-1.21441	0.0996979	1	568	tags=11%, list=10%, signal=10%	7718/8552/1452/387082/55206/51535/56605/143384/440026/79183/163732/163051/100507433/10172/23036/79180/8774/51276/84146/165918/11103/5500/51710/10745/54900/527/2117/79939/94056/10049/55422/1390
ZNF652	119	0.38587	1.23533	0.100568	1	1810	tags=33%, list=31%, signal=23%	55109/134359/2073/253143/4863/339500/4155/57551/143/29068/9988/23272/7707/23341/23637/5289/23269/54799/545/60684/10254/4012/23080/84498/55125/57695/64921/80067/23390/255520/63939/23023/157567/54925/11216/2186/158431/65251/23503
ZFP28	258	0.290369	1.00812	0.103803	1	1640	tags=32%, list=28%, signal=24%	55109/7514/7155/23097/80208/2073/79800/100129842/10521/79738/2218/339500/84874/84436/57551/4144/9879/9849/25913/9988/139818/23272/92255/100190939/23341/7072/55578/5289/6654/8994/55197/23269/57492/285527/81571/54799/80095/4695/23306/9330/23506/545/64864/60684/22978/9678/22862/9868/5884/57560/146198/90987/140609/4773/84899/55763/90957/22880/148103/23382/25998/57337/8615/144245/55125/6390/27340/2318…
SKI	16	-0.820988	-1.42962	0.104651	1	431	tags=69%, list=7%, signal=64%	4790/55095/285093/121665/26051/1453/23308/9150/23135/58489/129807
MXD4	30	-0.750757	-1.40899	0.106242	1	667	tags=40%, list=11%, signal=36%	1659/10838/23774/91833/5295/26043/1453/22850/155435/91355/51621/57602
MXI1	63	-0.691628	-1.36728	0.108324	1	601	tags=22%, list=10%, signal=20%	9585/64795/26036/4189/79183/10171/6513/7855/51099/665/23204/55544/81689/54855
MEF2C	12	0.650405	1.38808	0.116216	1	462	tags=25%, list=8%, signal=23%	23741/7155/55435
ZNF212	453	-0.562843	-1.15621	0.117882	1	1151	tags=35%, list=20%, signal=31%	84285/56990/7871/5929/23633/54880/6198/54861/100652748/126070/10520/55870/54882/6780/1399/80232/27125/23186/4928/10042/148268/23168/55054/80264/91120/22894/9798/80818/66036/6774/53371/22853/9818/1659/3189/5290/26959/3845/121665/7189/140901/1060/10838/55249/55660/23169/253260/59348/5007/55773/1408/9762/1859/7695/23215/59345/7110/245711/10308/147339/8874/165324/166968/7403/51340/51163/91746/51755/7…
DNMT3B	23	0.569889	1.44758	0.121094	1	639	tags=17%, list=11%, signal=16%	29985/148327/84958/4188
ZNF239	15	0.624094	1.3781	0.122283	1	2134	tags=93%, list=36%, signal=60%	55188/60526/55719/93627/55657/64582/55779/7625/6565/65123/7730/29102/100499483/220992
ZNF445	199	0.327917	1.16255	0.124994	1	2455	tags=62%, list=42%, signal=37%	1788/55131/23097/80208/2073/253143/2120/10521/84874/3551/84861/123096/57551/4144/143/64766/387032/81844/55738/23341/23637/55245/11128/9906/8994/9831/80153/22984/23269/57492/81571/54799/23306/63894/60684/22978/57506/22862/9761/9416/23080/84498/90987/7589/84899/22880/85363/84219/91749/55028/23199/9881/55687/23181/9278/161424/80317/489/9276/163131/7011/23450/56242/57326/110806298/2909/23195/57147/23…
ZNF827	105	-0.6405	-1.30511	0.125402	1	1227	tags=39%, list=21%, signal=31%	2744/5495/23394/55671/284309/8491/57711/6198/91120/22894/80818/9818/253260/5007/1859/7695/23215/8874/165324/7403/26051/7693/79612/283624/122830/9698/163051/10172/54764/54439/51276/23198/2673/49854/51710/9908/25820/7561/221079/51762/23429
ZNF391	17	0.608551	1.37046	0.12766	1	1700	tags=71%, list=29%, signal=50%	79800/80312/339500/9849/7072/9678/146198/84527/7582/56242/162963/153364
ZNF385A	90	-0.634845	-1.28769	0.129103	1	732	tags=17%, list=12%, signal=15%	55959/81572/604/55122/5878/382/79180/51447/9935/11103/7262/7259/5879/527/7538
ZNF3	391	-0.569594	-1.17386	0.13	1	1238	tags=33%, list=21%, signal=28%	23014/6627/27297/83608/7305/80124/147694/396/390980/4690/284309/9667/79862/56990/5929/1022/23633/6198/100652748/126070/10520/55870/6780/79818/90411/10006/6651/4928/10042/148268/79577/23168/80264/5717/91120/9798/23435/163590/6774/266812/53371/1659/1060/10838/55660/4848/59348/57062/84851/7695/23215/59345/7110/245711/51335/147339/165324/64795/3313/51340/56681/5927/57708/9821/81572/7693/23119/29115/5…
ZBTB37	170	0.330544	1.09913	0.131773	1	2411	tags=52%, list=41%, signal=32%	8125/100874110/4817/84307/80208/253143/4548/10521/4710/84874/3551/84861/25961/4144/143/641339/51398/78996/81844/55738/9906/8994/9831/23269/81571/4695/81704/114044/57506/9761/8629/374920/22880/91749/144245/55125/9881/7006/23181/54832/161424/147991/84920/29911/7011/2909/23195/9187/51479/23132/158431/23503/79943/9727/84167/65018/84260/9400/57614/9725/8837/146050/55717/84872/60677/124923/10466/10985/…
ZNF844	391	-0.56159	-1.16064	0.134865	1	1211	tags=39%, list=21%, signal=33%	147694/8693/3178/6882/157769/23394/10988/55671/284309/10116/79862/8491/57711/9412/5277/7871/54861/126070/157638/54882/27125/149371/79666/168374/55922/5597/148268/10725/91120/26224/22894/80818/5144/571/9329/7159/53371/9818/10605/84640/3189/5290/9655/7812/7189/3612/10059/9451/23169/262/5007/114883/94241/219333/10276/1859/7695/6049/7110/147339/166968/55175/51340/64376/51163/91746/51755/7994/29072/76…
HIC2	53	-0.670697	-1.31386	0.135198	1	789	tags=43%, list=13%, signal=38%	205564/63906/9667/100652748/79818/10270/1659/51335/79571/23774/91833/8552/25778/6047/7551/24144/1778/1453/550631/9766/91355/51621/79939
ZBTB8A	163	-0.597873	-1.23985	0.135942	1	898	tags=28%, list=15%, signal=24%	9655/121665/10838/29967/29919/59345/245711/147339/8874/165324/116254/7994/26051/7693/91833/11025/122830/5295/56605/126298/26043/163051/10172/8087/8027/6477/22850/54764/5128/54439/51276/9859/23198/2673/26524/49854/7525/11171/5903/4149/57602/1997/6711/163859/7798
ZSCAN9	59	-0.660751	-1.31414	0.13705	1	1041	tags=42%, list=18%, signal=35%	11143/79803/51104/23394/403341/10657/80818/9329/9655/10838/85365/51755/7693/55269/55818/10342/80829/22850/5128/85364/80204/26524/155435/91355/51320
L3MBTL3	175	-0.59899	-1.22683	0.138178	1	1199	tags=36%, list=20%, signal=30%	157769/23394/55671/10746/10116/8491/54880/6198/54882/8030/9337/149371/3344/26224/22894/66036/571/84640/3189/5290/3845/7812/140901/10059/9451/23169/26092/55279/1859/6049/7110/166968/51340/29072/55818/23469/84945/10208/7844/57590/3156/54704/9107/3839/168850/7534/51696/6670/80829/22911/3799/8204/8556/142891/80204/64746/10892/2673/51132/23411/6867/139231/25820
ZNF684	322	-0.568933	-1.18062	0.140859	1	1149	tags=34%, list=20%, signal=29%	729515/56990/10933/51441/1022/10520/2553/255919/51187/10920/84975/51503/9802/51188/10042/79577/23168/1977/80264/8560/5717/51026/25949/124491/10959/54556/6500/53371/26528/101927275/84324/51562/55905/29093/1060/55660/735301/4848/58526/59348/283635/54918/7695/6993/58515/165324/7341/7323/116254/56681/79568/57708/84933/81572/9530/10978/9528/29115/56851/1452/51669/6047/9689/257415/51714/9541/55206/5153…
HHEX	157	0.331159	1.10624	0.141981	1	602	tags=17%, list=10%, signal=16%	4709/7336/9978/29081/5710/51728/9967/114769/138428/64928/126382/4707/3155/440574/79064/51019/10476/374659/79833/55111/29082/3059/5889/400569/246184/5721/81493
ZSCAN21	154	0.340803	1.15384	0.145589	1	1389	tags=35%, list=24%, signal=28%	55791/56652/23059/79607/55131/100874110/4817/84307/10902/55179/100132707/9570/25961/50840/641339/91151/387032/78996/81844/28970/57185/55738/27030/55869/171568/56339/23637/11128/9906/80153/84909/22984/23269/10780/7918/202243/6302/89781/114044/55846/285855/339318/84498/101101775/197407/222236/197342/26048/7586/5281/55028/14/7508/23404
CBX2	37	0.470896	1.27562	0.150943	1	1653	tags=35%, list=28%, signal=25%	27306/83879/7102/1788/5026/100190939/84532/9331/64798/100652865/50861/636/57326
ZNF492	19	-0.732726	-1.34502	0.154294	1	1178	tags=63%, list=20%, signal=51%	284309/57711/168374/91120/26224/22894/6049/7693/163051/10172/253943/7561
TIGD7	133	0.31754	1.0608	0.155075	1	1389	tags=38%, list=24%, signal=29%	55791/56652/23059/79607/55131/100874110/4817/84307/100132707/9570/25961/50840/81493/641339/124401/81844/28970/400506/27030/171568/124790/56339/11128/9906/22984/23269/10780/7918/11333/6302/114044/84283/29095/55846/84173/285855/339318/197407/201181/7589/197342/26048/374920/7586/5281/54944/14/343099/7508/23404
ZNF30	158	0.326876	1.10011	0.156317	1	1097	tags=22%, list=19%, signal=18%	6742/9321/9967/1965/55035/10944/23059/11340/285331/55333/64710/23091/546/158234/10443/50840/81493/6688/84081/9789/28970/83448/55171/27030/55869/84524/79741/10780/79886/51377/4931/7644/348995/55599
GFI1B	28	0.497371	1.28064	0.156489	1	181	tags=11%, list=3%, signal=10%	4778/30061/25853
THAP1	293	-0.568665	-1.17316	0.161	1	1093	tags=32%, list=19%, signal=27%	51053/51187/10920/9337/51503/168374/3344/79577/1977/80264/51026/56902/92140/51260/92345/25949/124491/5877/10959/54556/53371/548645/83452/10605/55270/51562/3612/58526/10438/26092/8036/60488/51118/6049/7341/9585/7323/51340/64376/51163/51388/8533/57708/6643/153222/9528/10914/1964/84945/55854/51669/5701/9689/23160/4189/257415/51714/9541/51535/988/51444/55602/5504/55186/80314/64282/819/9318/10250/9774…
FLYWCH1	61	0.410036	1.26945	0.163733	1	2754	tags=75%, list=47%, signal=41%	3551/80152/29125/81844/10454/55738/7343/8994/4294/9909/23550/90987/9924/8216/22880/84219/23199/55687/23181/84988/7011/110806298/10013/1241/221927/9400/100499483/8514/10985/26152/3631/10235/11190/11253/1186/57704/91304/100289678/50619/55780/25989/56928/23523/11180/3590/146691
ZNF625	80	-0.625356	-1.25664	0.169811	1	512	tags=18%, list=9%, signal=16%	165324/7693/7551/26043/163051/10172/7673/51276/51710/10745/5903/7561/6711/7798
PPARD	30	-0.684709	-1.3022	0.170185	1	851	tags=33%, list=14%, signal=29%	3566/2081/9673/4780/200734/51696/6533/2683/10892/51429
ZNF79	173	0.328103	1.12811	0.171204	1	1810	tags=39%, list=31%, signal=28%	55109/90317/84656/7705/80208/2073/253143/4548/10902/55776/57551/143/132949/9988/23272/93973/23341/23637/5289/11128/22847/9831/23269/81571/80095/178/60684/10254/57470/25929/4012/53981/23080/9025/339318/84498/146198/90987/7589/26048/90957/22880/7586/2957/55028/55125/7508/55687/84437/57695/23390/9276/23310/55668/55128/2909/55094/23195/54925/57147/22796/51479/23132/158431/65251/55471/23503
TOX	18	0.566431	1.29739	0.171779	1	854	tags=22%, list=15%, signal=19%	9840/80312/80321/55906
PLAGL1	93	0.364862	1.15879	0.182087	1	2452	tags=60%, list=42%, signal=36%	79800/2120/10521/2218/123096/135293/285343/100190939/81558/6654/7318/57492/54799/9330/63894/22978/55133/29899/57506/22862/90987/84899/9331/23382/8615/144245/64798/147991/64921/489/56242/27032/636/9203/153364/9727/7795/2078/29102/23060/200316/6938/134957/55213/79969/6777/140700/9202/26086/9459/57534/8805/2647/84056/286410/4763
ZNF597	11	-0.780892	-1.33345	0.184168	1	852	tags=82%, list=14%, signal=70%	4690/56990/59348/7695/7693/5295/163051/7673/1997
TBX21	14	-0.760454	-1.34282	0.189736	1	334	tags=43%, list=6%, signal=41%	284309/55054/9263/23670/254170/6932
ZKSCAN2	477	-0.545241	-1.12405	0.192	1	1324	tags=41%, list=23%, signal=34%	342371/5976/51322/10048/163126/8509/64319/284352/6832/11011/26205/7536/55167/51306/79960/285237/5286/10001/4670/115426/11143/2744/5495/147694/79803/157769/51104/23394/23268/55671/115509/284309/10116/8491/57711/7871/54880/6198/54861/126070/54882/8030/80232/27125/23186/149371/79666/168374/4790/9883/403341/148268/55054/10725/26224/22894/10657/80818/63925/571/124583/9329/7159/22853/9818/10605/84640/3…
THAP11	298	-0.561202	-1.15741	0.192771	1	744	tags=13%, list=13%, signal=12%	22928/56681/7417/5927/57708/81572/29115/8552/1452/387082/26036/257415/55206/143384/10658/5926/163732/5611/10286/79180/57862/51447/55330/165918/11103/9584/5500/5049/10745/11100/5805/23204/2117/9589/6018/5718/51526/94056/10049/55422
ZNF830	98	-0.599247	-1.23049	0.194415	1	1274	tags=38%, list=22%, signal=30%	117143/285237/10001/147694/390980/4690/115509/284309/79862/9412/93621/148268/79577/80264/266812/85365/59348/7695/7110/51335/165324/51340/51163/7693/122830/7551/163051/10172/85364/54439/84146/51132/7259/49854/51710/7561/23429
FOXO3	193	0.331883	1.21458	0.196286	1	451	tags=19%, list=8%, signal=18%	154791/8673/56915/79077/280636/65993/6944/5880/5699/64949/8815/84313/1891/402/3396/29844/29108/100188893/138716/28956/10126/58485/51287/10330/6183/204/118487/64981/150223/1019/114984/90871/79763/593/57017/55009
RARG	16	-0.738387	-1.31974	0.197037	1	32	tags=31%, list=1%, signal=31%	128866/7133/3074/79180/4000
STAT3	307	-0.555505	-1.14987	0.199399	1	799	tags=21%, list=14%, signal=19%	59345/245711/8874/165324/79571/56681/5927/23528/29115/55030/23774/2803/91833/8552/55096/1452/25778/6047/387082/7551/55041/24144/1778/55206/54820/143384/79183/55031/58490/10658/84124/26043/5966/163732/5611/23036/57862/6397/23099/550631/9766/384/54439/142891/165918/11214/22835/123879/5500/5049/23670/10745/4149/57602/163049/79660/2117/5791/9589/79939/27342/10370/5718/94056
ZKSCAN5	190	-0.578238	-1.17698	0.20102	1	1468	tags=39%, list=25%, signal=30%	54520/8453/7690/85369/374879/10137/197131/6314/7874/81669/23042/348327/9529/10181/11011/51306/5286/205564/63906/80124/5495/23394/55671/115509/284309/5929/6198/126070/55870/54882/1399/90411/4928/148268/80264/80818/66036/1659/59348/5007/9673/84851/7110/245711/8874/165324/51340/51163/5927/29072/9807/55030/23774/91833/6047/7551/24144/9698/1778/55031/58490/26043/23036/1453/54764/54439/51276/105372481/…
IKZF3	19	0.518024	1.20784	0.208861	1	465	tags=32%, list=8%, signal=29%	3575/168537/51176/4863/2113/162394
ZNF18	286	-0.552087	-1.13518	0.210421	1	1463	tags=42%, list=25%, signal=33%	8453/7690/79441/51277/5082/374879/51654/11052/114799/81669/80018/81034/4193/59343/9529/10181/56913/10668/51742/28990/6832/79960/117143/205564/10001/6430/23014/83608/80124/147694/390980/4690/81555/284309/9412/84285/56990/51441/5929/100652748/10520/255919/79818/10920/6651/10270/10042/148268/79577/23168/80264/5717/51026/22894/60493/124491/66036/266812/54556/1659/51562/1060/10059/59348/57062/7695/593…
MAFK	140	-0.579621	-1.18471	0.216855	1	706	tags=22%, list=12%, signal=20%	22992/90268/9618/2077/23774/9846/4097/9267/5295/55625/126298/84957/2769/51343/57649/1453/2114/85364/9792/80204/126917/79720/26524/57154/6016/91355/51621/4209/51320/8178/2355
TSPYL1	322	-0.5456	-1.12019	0.227136	1	1280	tags=32%, list=22%, signal=27%	151903/117143/106481790/9878/205564/388341/6430/23014/6627/27297/63906/80124/396/390980/6921/9667/79862/84447/25798/10933/51441/5929/1022/51399/23633/100652748/9349/79818/3954/10920/84975/51503/51188/23168/5717/7040/11066/163590/124491/6774/266812/116842/54556/6500/1659/84324/5912/29093/59348/283635/57062/51335/58515/165324/64795/79571/105369758/7417/23528/81572/9530/29115/7718/8552/1452/25778/60…
E2F7	16	0.546757	1.23448	0.229917	1	2378	tags=81%, list=40%, signal=49%	348235/79733/7112/10592/55345/84515/79980/253714/81930/11169/84886/55148/79682
NAP1L5	83	-0.605297	-1.21114	0.230601	1	1276	tags=52%, list=22%, signal=41%	54934/84946/201626/55787/8731/79441/51277/5082/114799/9529/79960/117143/10001/23014/147694/390980/284309/79862/51441/5929/10520/148268/55270/23169/57062/7695/51335/64795/3313/51163/51388/7693/9689/7551/64112/6924/80314/10172/9774/9804/7259/23670/7561
HIF1A	407	-0.534917	-1.10215	0.237762	1	873	tags=32%, list=15%, signal=30%	55660/9451/901/10560/253260/25977/54790/54918/55773/8036/23215/6884/6049/7110/245711/10308/166968/7323/51340/64376/91746/3459/56681/7994/57708/9821/153222/79612/25909/23469/2803/84945/55854/25897/122830/10208/9689/7844/26036/55041/4189/9541/5520/988/9107/51444/143384/440026/5504/55186/55031/149041/51362/58490/2181/168850/23011/25948/5926/221037/5966/10672/9318/51696/54469/151987/6670/2908/23036/9…
GATAD2B	153	-0.572284	-1.1681	0.241026	1	1325	tags=29%, list=23%, signal=23%	84444/51322/10048/11011/51306/5286/26100/5495/23394/10746/56888/8491/4928/403341/10725/55095/80818/26959/4204/121665/55249/253260/219333/9673/55279/5537/8874/23219/7403/26051/283624/9807/23360/2077/4780/51696/57649/57701/6309/57154/155435/25820/9043/23429/23387
FOXM1	77	0.359449	1.11881	0.243697	1	1181	tags=22%, list=20%, signal=18%	3925/51645/203068/29901/113829/54919/10607/79733/4176/2271/51337/7374/5709/10025/7112/9416/4172
CEBPB	21	-0.691434	-1.25358	0.246556	1	367	tags=48%, list=6%, signal=45%	2512/10437/7133/55647/11025/7277/133/9935/4814/5329
ATF7	173	0.307421	1.07514	0.246879	1	1314	tags=37%, list=22%, signal=30%	4602/5987/10922/8717/6480/10238/10126/90861/729440/29965/23097/54916/79800/54919/408/10521/2218/83852/3551/22900/135293/143/285343/64766/23357/4221/10454/10230/23386/100190939/81558/6654/9831/6778/7318/57492/5709/50485/84320/9875/92241/9909/63894/81704/127428/51112/55116/5869/23506/55833/10025/23550/57506/91754/9416/84532/5863/8440/9924/118424/23382/5532/22839/54956
ZNF574	10	-0.742166	-1.25848	0.249581	1	1378	tags=80%, list=23%, signal=61%	10523/7536/55167/11143/79693/9825/6903/6046
ZHX3	36	0.412132	1.13703	0.251142	1	1810	tags=42%, list=31%, signal=29%	84656/253143/23269/81571/9875/8629/22880/27340/23277/23310/2909/23195/51479/23132/23503
SMAD3	10	-0.736166	-1.23519	0.251273	1	1132	tags=60%, list=19%, signal=49%	84444/4791/5467/259307/10892/7057
ZNF821	16	-0.703229	-1.24217	0.261682	1	729	tags=44%, list=12%, signal=38%	9798/7994/58490/5971/2872/57154/155435
NRF1	187	-0.557694	-1.1407	0.263747	1	1138	tags=30%, list=19%, signal=25%	5929/23633/100652748/6780/90411/10270/4928/10042/5717/9798/6774/1659/101927275/4204/5007/9673/9762/8874/165324/79571/5927/23119/29115/9807/23774/2803/91833/8552/1452/25778/6047/55041/24144/9698/9267/1778/55206/143384/79183/55031/58490/10658/26043/23036/1453/6397/23099/550631/9766/142891/11214/163049/9043/2117/23429/79939/64061
HOXA7	10	-0.732183	-1.2503	0.266898	1	679	tags=40%, list=12%, signal=35%	3205/3203/3202/84858
MST1	14	0.551783	1.18868	0.272997	1	2237	tags=79%, list=38%, signal=49%	9973/80152/124401/197342/65095/643008/65018/5498/9400/55298/80344
ZBTB43	288	-0.532613	-1.10551	0.276276	1	738	tags=25%, list=13%, signal=23%	91746/3459/56681/5927/57708/84933/23528/9821/29115/2803/91833/8552/55096/1452/25778/4097/6047/387082/55041/9267/9541/55206/143384/440026/55031/149041/58490/10658/2181/23011/5926/5966/5611/54469/23036/57862/84981/8774/9766/54439/8780/142891/164/84146/11214/23198/9584/51330/5500/56675/9218/1499/5049/6867/5903/1998/123720/163049/490/9043/79660/1105/79753/2117/5861/5791/9589/79939/6018/27342/5718/649…
ING5	30	-0.6402	-1.20394	0.279739	1	844	tags=37%, list=14%, signal=32%	968/23126/85369/23042/10181/124245/5007/2956/171023/105372481/6421
HOXA10	12	-0.690646	-1.20562	0.284839	1	679	tags=33%, list=12%, signal=30%	3205/3203/3202/84858
FOXO1	66	-0.586632	-1.1483	0.288372	1	729	tags=42%, list=12%, signal=38%	7994/25909/91833/9267/58490/23011/10672/51696/9595/22850/84132/2872/54764/5128/8556/142891/2033/51274/9263/23198/23308/51429/5903/123720/7430/79753/3091/27342
TSPYL4	187	-0.549214	-1.12891	0.295199	1	1223	tags=35%, list=21%, signal=29%	7305/147694/390980/6882/51104/23394/55671/115509/284309/79862/57711/93621/51441/6198/168374/148268/91120/22894/80818/92345/266812/9329/10605/84640/9655/10838/23169/262/85365/59348/1859/7695/6049/165324/116254/51163/51388/7693/122830/51669/7551/56605/64112/6924/80314/163051/10172/7673/9804/22850/54764/5128/8204/85364/54439/51276/105372481/49854/23411/51710/9908/7561/51320/54941/6421/79647
CASZ1	429	-0.527347	-1.08281	0.297	1	971	tags=34%, list=17%, signal=31%	571/285093/124583/9329/7159/22853/9818/7975/84640/3189/5290/26959/3845/121665/7189/140901/55249/51061/9451/253260/26092/5007/22936/219333/9673/55279/1408/9762/1859/23215/6049/10308/7109/219988/9921/23219/166968/7403/55175/64376/91746/51755/7994/29072/9821/22992/26051/25909/55818/283624/90268/9807/23360/23774/23469/91833/122830/6455/9619/10208/4780/7844/171023/9698/9267/7326/5520/51164/54915/9107/…
SAFB	392	-0.527515	-1.08186	0.298701	1	1088	tags=28%, list=18%, signal=25%	80232/27125/23186/23299/4928/4790/9883/403341/55054/10725/11021/9798/80818/63925/7159/22853/1659/114789/7975/26959/4204/140901/55249/51061/5007/9673/1408/9762/1859/23215/245711/7109/9921/7403/79571/55175/91746/51755/7994/7458/29072/22992/55269/23119/7328/25909/55818/90268/9807/23360/23774/91833/55096/4097/171023/55041/9698/9267/1778/51164/51271/126298/84957/54893/10949/58490/10658/26043/1119/5966…
ZNF721	195	-0.540398	-1.10863	0.300306	1	1031	tags=28%, list=18%, signal=24%	80264/10725/22894/80818/53371/9818/84640/5290/26959/9451/253260/5007/94241/10276/55773/6049/147339/5537/166968/51340/7994/153222/7693/79612/226/25909/23469/122830/10208/2956/9698/5520/988/10342/163051/10172/151987/57403/7673/8027/6477/54764/5128/51276/9859/2673/49854/23411/9908/5903/221079/51762/7431/6711
E2F2	23	-0.671372	-1.20537	0.305132	1	439	tags=22%, list=7%, signal=20%	11163/6513/7855/51099/55544
ZNF443	383	-0.525927	-1.08443	0.308691	1	1155	tags=24%, list=20%, signal=21%	57711/9412/7871/51441/5929/6198/126070/10520/55870/54882/90411/6651/5597/148268/79577/23168/80264/91120/22894/23435/66036/53371/65117/1060/10059/4848/23169/59348/114883/57062/84851/7695/23215/59345/7110/147339/165324/3313/51340/5927/23528/7693/23469/2803/91833/7718/55096/122830/9689/2956/7551/23160/26036/24144/55206/56605/988/55186/55031/149041/6924/1655/163732/163051/10172/8087/23036/9774/7673/8…
GTF2IRD2B	27	0.436427	1.11861	0.309963	1	1611	tags=59%, list=27%, signal=43%	283537/134359/23272/23341/7072/54799/23506/57470/5884/90987/84899/56916/64921/80067/93643/255520
ZNF582	11	0.555953	1.1476	0.316354	1	1973	tags=64%, list=34%, signal=42%	147657/55776/57325/339318/84527/7627/7730
MAX	228	-0.534491	-1.09723	0.324597	1	596	tags=25%, list=10%, signal=23%	5290/51562/3845/55905/55249/4848/253260/59348/55773/148423/8874/165324/116254/9821/153222/91833/6047/9698/9541/56605/143384/440026/55186/51362/10342/58490/23011/5926/163051/23036/57403/8027/22931/6477/84132/142891/80219/84146/23484/5500/11171/9741/10745/10289/56829/64645/1105/79753/79139/2117/23429/9589/27342/2959/5718/51526
CDYL	118	-0.553079	-1.11744	0.328025	1	1226	tags=26%, list=21%, signal=21%	26100/5495/23394/55671/10746/23633/6198/55870/54882/6780/4928/80264/4204/4848/9673/55773/8036/5927/9821/153222/9807/2803/91833/4780/9698/5520/55031/23198/25820/23429/91663
ORC1	36	0.410201	1.09217	0.331915	1	2425	tags=67%, list=41%, signal=39%	79733/4176/7112/91687/10592/4175/9949/23310/55345/4174/84515/9562/79980/3978/253714/29127/4171/81930/5983/55706/11169/55148/79682/5985
ZNF552	208	-0.532014	-1.09476	0.342508	1	1273	tags=34%, list=22%, signal=28%	106481790/9878/205564/388341/10087/6627/27297/63906/80124/390980/257068/9667/79862/100874272/5929/51399/100652748/126070/375035/148268/60493/11066/163590/6774/116842/1659/57062/84851/59345/51335/79571/105369758/5927/23528/7693/23119/29115/23774/91833/8552/55096/25778/6047/5936/7551/24144/1778/143384/126298/79183/10658/84124/26043/100507433/10172/6397/550631/9766/384/51447/11214/7259/5049/51710/10…
IRF9	21	0.462484	1.09476	0.345196	1	440	tags=29%, list=7%, signal=27%	54739/54809/3434/91543/3437/94240
HIC1	35	-0.576621	-1.11382	0.355731	1	1390	tags=54%, list=24%, signal=42%	64121/9261/168455/4067/64319/26205/79803/4791/10019/4790/7109/23774/55625/5971/80829/23308/57154/415116/51621
E2F4	86	0.32133	1.02287	0.358025	1	1149	tags=31%, list=20%, signal=26%	10922/203068/29901/7263/84964/81628/150223/113829/54919/5833/51548/127262/6794/149603/4221/10454/29920/439/7343/81605/5709/5869/10025/161882/23550/23648/9416
ZBTB6	343	-0.513113	-1.05882	0.361361	1	1199	tags=34%, list=20%, signal=29%	157769/51104/23394/10988/8813/55671/4690/284309/10746/10116/8491/57711/6198/54861/8030/23186/9337/149371/9861/79666/168374/3344/403341/51026/26224/22894/80818/571/53371/9818/10605/84640/5290/26959/3845/7812/7189/3612/10059/55660/901/253260/262/85365/26092/114883/219333/54790/56255/55279/8036/51118/1859/6049/7110/10308/147339/5537/23219/166968/7403/51340/51163/55818/23360/23469/84945/122830/10208/…
ZNF219	75	0.333125	1.02696	0.365079	1	718	tags=20%, list=12%, signal=18%	2079/9978/114769/5686/440574/91612/10476/4054/6717/29082/4190/123096/79717/9789/5688
KDM4B	119	0.325071	1.07074	0.365938	1	2455	tags=58%, list=42%, signal=34%	80208/408/80325/3551/84861/123096/1796/6794/10454/5026/9906/6778/23269/81571/9875/9909/22978/57506/91754/84532/5863/22880/23382/6653/84219/11094/9881/64798/23277/23181/9278/161424/489/7011/22937/57326/57121/2909/9187/51479/10013/23503/79792/9727/9400/23060/90594/9725/10985/347344/6777/54662/6786/79724/222229/4261/514/192670/283337/9459/2787/150465/7317/23499/84893/84614/11253/1186/9690
ZNF506	251	-0.519117	-1.0669	0.36747	1	1227	tags=29%, list=21%, signal=24%	2744/7305/5495/147694/6882/23394/4690/284309/57711/9412/6198/54861/55870/54882/10006/4928/148268/80264/91120/53371/9818/5290/4204/10838/253260/5007/114883/94241/7695/23215/147339/8874/165324/116254/7994/7693/79612/226/23360/23469/91833/122830/7551/9698/5520/56605/440026/55186/58490/26043/23011/163051/10172/23036/57403/8027/6477/54764/5128/51276/8556/22835/9859/23198/2673/49854/51710/9908/5903/414…
TCF3	154	0.30837	1.06511	0.382567	1	1655	tags=32%, list=28%, signal=24%	4602/9315/9967/114769/1021/203068/90861/54919/10607/23357/6794/4221/10454/81558/81605/57492/51337/5709/285971/9875/9909/51112/23506/55833/10025/57470/116138/23648/84532/90987/23382/5532/54956/9656/56931/26259/23277/55311/5198/64921/7023/489/55643/6666/10063/93643/80324/22937/57326/7625
DPF2	72	-0.540903	-1.08419	0.390519	1	1138	tags=28%, list=19%, signal=23%	5929/23633/6780/1399/23168/80264/5717/55905/55249/4848/58526/165324/6047/9698/440026/10250/51447/10221/8480/4149
CHCHD3	286	-0.508456	-1.05681	0.394578	1	885	tags=21%, list=15%, signal=18%	1060/506/55660/253260/25977/54790/55773/8036/23215/811/7110/7323/51340/91746/3459/56681/5927/57708/9821/153222/2803/84945/292/9541/143384/440026/55031/149041/23011/5926/221037/54469/23036/9774/22931/8774/8780/142891/164/84146/9584/1983/10625/5500/665/9218/23670/4084/51430/1105/51762/3091/5861/5791/9589/6018/27342/10135/51646
ZNF419	221	-0.511134	-1.06156	0.399798	1	1227	tags=29%, list=21%, signal=24%	2744/5495/147694/157769/23394/4690/284309/8491/57711/54861/126070/4928/403341/148268/10725/22894/9798/80818/53371/9818/5290/26959/10838/253260/5007/7695/6049/7110/147339/165324/7994/29072/7693/55818/23360/55030/23469/91833/122830/7844/7551/9698/10342/58490/26043/163051/10172/7673/22850/54764/5128/54439/51276/80204/164/23198/105372481/2673/51132/7525/5903/139231/25820/7561
ZNF792	102	-0.520263	-1.06049	0.40625	1	1025	tags=19%, list=17%, signal=16%	55095/10657/80818/9329/9655/10838/7693/55269/9807/171023/10172/54764/5128/85364/79720/26524/155435/51320/6711
CBX4	38	-0.560584	-1.0711	0.410354	1	965	tags=42%, list=16%, signal=35%	124583/8570/10291/283991/9275/219988/9825/55122/7326/54915/6844/9792/11100/4209/90007/9441
NFE2L2	374	-0.506751	-1.04653	0.41041	1	919	tags=29%, list=16%, signal=26%	84640/5290/26959/4204/3845/55660/9451/253260/85365/59348/26092/5007/114883/22936/219333/54790/9673/55279/55773/8036/9762/1859/23215/6049/7110/245711/10308/5537/8874/23219/166968/7403/51340/3459/7994/29072/9821/153222/26051/55818/283624/9807/23469/2803/91833/84945/122830/10208/8301/5520/51164/9107/3839/55031/149041/58490/168850/23011/25948/5966/10672/51696/54469/151987/6670/80829/2908/23036/57403/…
JRK	54	0.356153	1.03817	0.413793	1	2536	tags=61%, list=43%, signal=35%	100874110/84861/91151/124401/81844/55738/171568/22984/114044/9761/197342/374920/22880/55687/161424/7011/23195/23503/79943/84167/84260/9400/9725/124923/55298/222229/283337/11190/79639/84614/57704/25851/1773
GLYR1	187	0.32104	1.11587	0.415125	1	1823	tags=40%, list=31%, signal=28%	56652/90861/55131/80208/253143/4548/9477/3551/84861/143/142/81844/8243/55738/23386/7343/55245/11128/9906/8994/9831/80153/22984/23269/81571/9875/23306/81704/8602/4077/57470/25929/23550/55735/7409/53981/91754/9761/9416/23080/51490/83746/84498/124454/9924/22880/84219/5905/55125/7508/23404/9656/55687/27340/23181/161424/2733/5198/9276/7011/23310/23450/7024/2909/23195/51479/23132/84515/51077/158431/557…
POLE3	79	-0.528607	-1.05089	0.421525	1	1166	tags=43%, list=20%, signal=35%	55781/80745/162239/11218/7528/5612/5562/8453/201965/10776/143684/200933/100506681/10116/84285/5501/9337/51026/22894/92140/10959/10605/3313/51163/122830/7326/51444/55602/3839/51552/80829/9804/25843/5930
KLF12	16	0.462661	1.0356	0.422156	1	465	tags=31%, list=8%, signal=29%	3575/51176/472/4863/162394
ZBED3	194	-0.503338	-1.04319	0.434385	1	1042	tags=22%, list=18%, signal=19%	9883/473/55095/10657/80818/90580/9329/8570/10983/253782/10605/27075/10291/121665/10838/5867/1859/7693/55269/122830/171023/7326/54915/5430/3087/10342/51552/80829/57649/51729/26994/54764/5128/85364/79720/8493/155435/11100/6303/51320/221079/6421/79647
MRGBP	30	-0.572371	-1.05039	0.43634	1	327	tags=7%, list=6%, signal=6%	9584/51646
ZNF296	45	-0.547606	-1.04675	0.436836	1	499	tags=11%, list=8%, signal=10%	382/163732/1396/56905/10049
DLX4	15	0.463398	1.02148	0.438356	1	2157	tags=53%, list=37%, signal=34%	29901/2068/26001/79629/9333/349114/79650/5002
ZNF543	278	-0.502475	-1.03795	0.441206	1	1227	tags=28%, list=21%, signal=24%	2744/7305/5495/147694/51104/23394/55671/115509/284309/10116/8491/57711/54861/126070/54882/149371/148268/10725/22894/80818/9329/9818/84640/9655/10838/23169/85365/5007/219333/1859/7695/6049/147339/166968/51163/51755/7994/29072/7693/55818/9807/55030/23774/23469/91833/122830/7844/2956/7551/171023/3156/5295/163051/10172/6670/80829/7673/22850/54764/5128/8204/85364/51276/80204/1396/23198/2673/26524/5113…
JAZF1	27	-0.549584	-1.03163	0.441558	1	398	tags=19%, list=7%, signal=17%	7027/6513/7855/51099/4860
THAP2	80	-0.520374	-1.05085	0.441704	1	1002	tags=28%, list=17%, signal=23%	11066/116842/54556/6500/8570/10291/283635/5867/105369758/100216545/29115/8552/5611/100126791/384/64859/100130476/7439/11100/5805/6303/100129347
ELF3	20	-0.579886	-1.03729	0.445714	1	1578	tags=60%, list=27%, signal=44%	54897/81559/54520/81669/79133/27232/54882/80232/140901/9673/7109/283624
TGIF2	86	-0.517659	-1.03428	0.449275	1	820	tags=21%, list=14%, signal=18%	7532/8874/165324/79571/9807/23774/91833/6047/7551/9698/1778/56605/163051/10172/1453/51276/22835/79939
CREBBP	467	-0.498745	-1.0275	0.44955	1	912	tags=29%, list=16%, signal=26%	5290/26959/4204/7090/3845/121665/140901/55249/9451/253260/5007/9673/55773/9770/8036/9762/1859/23215/7110/7109/5537/219988/8874/23219/6809/7403/116254/51340/64376/91746/51755/7994/5927/29072/9821/153222/26051/79612/7328/25909/55818/283624/90268/9807/23360/23774/23469/2803/91833/122830/9619/6047/4780/171023/26036/55041/9698/9267/7326/1778/9541/5520/56605/54915/9107/143384/440026/54893/55031/149041/…
ZNF124	269	0.228257	0.82561	0.451105	1	856	tags=14%, list=15%, signal=13%	56898/6742/9321/9967/7360/55035/10944/84159/23059/11340/285331/55737/64710/6726/55153/546/168451/158234/10443/50840/81493/166785/51028/84081/7700/9789/152926/28970/83448/55171/27030/7707/56339/23637/84524/79741/55285/23185
BRPF1	158	-0.506373	-1.0322	0.453416	1	1645	tags=44%, list=28%, signal=32%	27097/23013/8729/8227/8085/488/54897/55627/7528/10847/81559/6433/127829/22993/25865/51593/2000/9261/155061/84444/342371/5976/8509/64319/9294/284352/26205/7536/4670/11143/79803/115509/54880/23186/23299/9883/63925/55700/124583/90580/9329/114789/79039/140901/55249/51061/5007/7109/51755/7458/22992/55269/90268/9807/6455/171023/54915/5430/80829/51343/57649/1453/85364/2033/26524/56905/57154/155435/51621
FOXN3	26	-0.559915	-1.03079	0.458728	1	1016	tags=23%, list=17%, signal=19%	10657/8570/10291/84324/55330/11100
REPIN1	150	-0.500897	-1.02188	0.459034	1	1063	tags=27%, list=18%, signal=22%	8896/10933/1022/51399/10920/51503/902/5717/1050/7040/54556/6500/8570/26528/81/101927275/10291/84324/29093/283635/58515/7341/56681/81572/29115/1452/143384/5611/10286/79180/57862/10440/11103/5500/56905/11100/5805/5718/51526/94056
IRF5	276	-0.499139	-1.02011	0.472892	1	622	tags=18%, list=11%, signal=17%	7341/64795/7323/91746/56681/5927/57708/9821/2803/9689/23160/26036/257415/9541/55206/64218/988/143384/440026/55186/55031/5926/80314/23036/10286/57862/54439/50640/80219/84146/11103/9263/9584/55701/5500/665/11171/5049/10926/5903/1105/79753/9589/6018/27342/81689/2959/5718/51526/51646/94056
SCML1	36	-0.539463	-1.01883	0.478589	1	546	tags=19%, list=9%, signal=18%	440026/55031/9263/23670/10926/6932/6498
MXD1	265	-0.488496	-1.01368	0.479879	1	738	tags=21%, list=13%, signal=19%	91746/3459/56681/57708/9821/2591/25909/3475/2803/55096/688/55041/4189/143384/440026/55031/2181/597/23011/5926/5966/54469/151987/22931/23099/84981/8774/64092/8780/50640/164/1983/1195/51099/204851/10625/5500/9218/80149/51710/51430/490/64645/1105/51762/79753/3091/5861/5791/9589/84807/27342/9262/10135/51646
ZXDA	340	-0.489627	-1.0152	0.485	1	898	tags=24%, list=15%, signal=21%	9655/7812/7189/140901/10838/901/85365/29919/5007/1408/1859/7109/147339/219988/166968/55175/51755/7994/7458/22992/7693/55269/6875/55818/26278/90268/9825/122830/65986/7844/171023/10678/11236/5295/54915/3087/54893/51552/10672/163051/160760/6670/80829/22911/57649/51729/6477/26994/22850/2872/54764/5128/85364/7799/9792/253943/80204/79720/8493/26524/56945/51132/49854/155435/80311/139231/56929/9929/25417…
TRIM24	210	-0.491901	-1.00958	0.487335	1	1029	tags=16%, list=17%, signal=13%	10725/55095/10657/80818/253782/7812/121665/114883/219333/1859/166968/55269/283624/23469/171023/23019/8027/54764/5128/51276/81566/9859/64746/8493/7525/23411/155435/139231/25820/221079/6711/6421/23387
DBP	119	-0.486331	-0.992243	0.489451	1	1038	tags=24%, list=18%, signal=20%	79577/23168/5717/1050/23435/163590/1060/4848/58526/57062/7695/165324/64795/23528/23160/26036/55031/163732/163051/57862/8774/51447/84146/11103/9584/1997/5718/10049
GATA1	22	0.409938	0.978262	0.491582	1	111	tags=9%, list=2%, signal=9%	30061/8328
ZNF395	424	-0.492848	-1.01176	0.494505	1	899	tags=24%, list=15%, signal=22%	3845/55905/121665/55660/4848/29967/253260/59348/5007/80723/7695/23215/59345/7110/245711/147339/84288/8874/165324/116254/7994/5927/23528/9821/26051/7693/79612/23360/55030/23774/2803/91833/1452/122830/51669/9619/6047/7551/26036/9698/9267/5295/56605/64218/143384/440026/55186/55031/149041/6924/58490/26043/23011/163732/163051/10172/8087/23036/56262/135228/1453/6477/22850/84132/8774/54764/5128/54439/51…
ZSCAN12	250	-0.491154	-1.00874	0.497477	1	1237	tags=29%, list=21%, signal=24%	339745/2744/9265/5495/55142/157769/51104/23394/55671/284309/10116/8491/57711/54861/23186/55922/403341/148268/10725/22894/10657/80818/9329/10605/26959/9655/7812/121665/10838/23169/5007/219333/1859/147339/126731/166968/51755/7994/29072/7693/55269/55818/9807/23360/23774/23469/122830/7844/5295/51164/54893/3839/10342/26043/10172/6670/80829/22911/8027/22850/54764/5128/80204/9859/2673/26524/56945/57154/…
STAT4	11	-0.595199	-1.00882	0.5	1	663	tags=27%, list=11%, signal=24%	330/2803/23670
YBX1	15	-0.575586	-1.00782	0.501553	1	157	tags=13%, list=3%, signal=13%	6103/57210
E2F6	65	-0.506559	-0.997211	0.502864	1	810	tags=15%, list=14%, signal=13%	84851/79571/7458/23119/23774/1778/10949/26043/550631/7798
SUV39H1	13	0.4567	0.982419	0.504975	1	782	tags=15%, list=13%, signal=13%	84065/4176
HDAC4	26	0.372552	0.957249	0.514403	1	1926	tags=54%, list=33%, signal=36%	116985/6778/81704/89849/28988/7011/23526/65220/132160/51479/2595/1241/224/4542
ZNF555	52	-0.496737	-0.966487	0.526316	1	1223	tags=33%, list=21%, signal=26%	7305/4690/284309/9412/126070/80264/59348/7695/147339/165324/7693/7551/988/163051/8087/7673/54439
RPS6KA5	179	0.274704	0.980074	0.530751	1	1106	tags=22%, list=19%, signal=18%	9321/9967/51076/55035/8405/10944/472/285331/55737/27332/4548/4528/23091/55153/546/11064/51319/10443/51028/120526/29068/84081/28970/83448/27030/6596/7707/79741/55285/23185/221443/91526/9994/51377/4931/545/9255/55599/8481
ZNF200	174	-0.4805	-0.985918	0.531697	1	859	tags=14%, list=15%, signal=12%	253260/59348/55773/8036/7110/10308/51340/6775/3459/5927/9821/2803/91833/4780/9541/143384/55031/5926/23036/84146/29982/6309/27342/1390
TCF7L2	128	-0.486654	-0.994758	0.534447	1	957	tags=30%, list=16%, signal=26%	53371/9818/5290/3845/121665/9451/253260/8036/5537/219988/23219/7323/7403/7994/26051/79612/9107/10342/23011/51552/10672/51696/151987/57403/51729/26994/54764/5128/142891/80204/51274/57154/7319/5879/64645/9043/1847/51762/23429
ZBTB18	130	0.284856	0.962131	0.537037	1	730	tags=15%, list=12%, signal=14%	4702/29081/3692/51504/90480/126382/4707/29796/79064/10330/285367/516/1978/8625/10467/4830/150684/79004/790955/26517
ZNF740	122	0.278495	0.973533	0.538462	1	1881	tags=33%, list=32%, signal=23%	10471/56652/8125/100874110/4817/3551/84861/78996/81844/55738/93973/171568/7343/8994/114044/9761/197407/8629/197342/374920/22880/23647/55687/9278/161424/29911/6810/7011/28955/7694/110806298/2909/23195/9187/23132/10013/23503/79943/84167/65018
ZNF713	358	-0.483075	-0.990982	0.544545	1	1288	tags=25%, list=22%, signal=21%	11011/26205/51306/79960/5286/124245/4670/11143/63906/2744/23394/55671/284309/57711/7871/56257/126070/54882/81875/27125/149371/9883/148268/55054/10725/55095/91120/2512/80818/10437/63925/124583/9329/7159/22853/4204/9655/140901/10838/23169/5007/114883/9673/84851/1859/7109/55175/51755/29072/22992/7693/55269/55818/283624/90268/23774/91833/2956/171023/9698/1778/54893/26043/23019/1453/84132/54764/5128/8…
UNK	65	0.332472	0.974036	0.545455	1	313	tags=11%, list=5%, signal=10%	4602/29985/6282/1021/1788/55131/148327
ZNF230	14	0.429344	0.93598	0.551724	1	397	tags=21%, list=7%, signal=20%	79692/2073/6814
MLXIP	176	-0.476375	-0.973252	0.559671	1	730	tags=19%, list=12%, signal=17%	51755/7994/29072/22992/55269/55818/7844/171023/9698/54915/5430/54893/26043/51343/57649/84132/2872/54764/2033/23198/79720/8493/57154/155435/51621/6046/51320/9567/6711/6421/57532/9441/51307
CDYL2	49	-0.487176	-0.940513	0.562273	1	681	tags=35%, list=12%, signal=31%	342371/11011/26205/56888/375035/403341/11021/9807/2077/23774/9846/4097/1778/54893/1453/57154/9043
ZNF180	498	-0.476007	-0.978747	0.583417	1	1203	tags=30%, list=20%, signal=26%	6882/157769/51104/23394/10988/55671/4690/115509/284309/10746/10116/8491/57711/84285/5501/6198/54861/126070/10520/54882/58517/9337/149371/9861/168374/5597/3344/148268/79577/55054/80264/51026/26224/22894/80818/92345/66036/571/9329/53371/9818/10605/84640/3189/5290/3845/9655/7812/140901/3612/10059/55660/23169/253260/59348/26092/5007/114883/54790/55279/8036/51118/1859/7695/23215/6049/7110/10308/147339…
KAT7	485	-0.478238	-0.981031	0.586414	1	1020	tags=31%, list=17%, signal=28%	26224/22894/10657/9798/80818/60493/100507347/63925/55700/571/124583/90580/9329/7159/22853/8570/10605/51143/84640/3189/26959/10291/9655/7812/55379/121665/7189/140901/10838/55249/51061/9451/23169/5007/1408/9275/1859/6049/7109/147339/219988/9921/23219/126731/166968/55175/64376/51755/7994/7458/29072/22992/7693/55269/6875/25909/55818/90268/23469/27107/9825/122830/65986/7844/2956/7296/171023/9698/7326/…
ZNF841	111	-0.45482	-0.930942	0.589798	1	1475	tags=28%, list=25%, signal=21%	26273/54520/374879/197131/6314/23042/10181/51306/5286/205564/23394/284309/7871/55870/54882/148268/66036/4204/114883/84851/29072/23774/55096/1778/51276/164/105372481/51132/51710/25820/9043
AHR	98	-0.453459	-0.92067	0.593985	1	618	tags=21%, list=11%, signal=20%	55122/7844/10678/11236/84230/168850/7534/51552/10672/160760/50999/26994/84919/1654/9792/253943/80311/139231/56929/25976/57532
HDAC5	120	-0.458863	-0.943378	0.595213	1	310	tags=13%, list=5%, signal=13%	55175/51755/22992/55269/9825/171023/10949/79720/57701/6046/4209/9567/23204/6711/64651/51307
NAP1L1	171	-0.458194	-0.948137	0.596725	1	1205	tags=30%, list=20%, signal=24%	3178/51104/10988/4690/9987/57711/5501/51187/65080/10175/168374/55922/22894/10657/92140/3646/10983/253782/10605/9655/7812/3612/10059/262/5867/51118/1859/6049/166968/1964/23469/55854/7326/11236/79868/51444/3839/168850/7534/51552/9318/8087/151987/6670/22911/9804/6856/253943/64746/56945/25843
ZBTB42	25	0.35651	0.898138	0.59707	1	2490	tags=68%, list=42%, signal=39%	408/123096/55738/9603/22880/5524/80324/28955/57326/2909/10013/8568/79724/79894/283337/150465/57704
SFMBT2	349	-0.467492	-0.96704	0.599198	1	1042	tags=25%, list=18%, signal=22%	9883/403341/55054/10725/55095/80818/571/7159/9818/253782/26959/3845/7812/121665/7189/140901/9451/29919/5007/219333/9673/1859/245711/7109/147339/126731/166968/7403/51755/7994/29072/22992/26051/55269/7328/25909/55818/26278/283624/90268/9807/23360/23774/23469/91833/7844/171023/9267/1778/5295/51164/54915/54893/58490/26043/51552/10672/160760/51696/6670/80829/57403/57649/1453/54764/5128/80204/2033/164/…
MSANTD3	207	-0.467415	-0.952763	0.601221	1	1047	tags=34%, list=18%, signal=29%	4790/9883/10725/10657/80818/124583/90580/9329/7159/10605/84640/9655/121665/7189/10838/55249/23169/85365/5007/219333/1859/165324/166968/51163/51755/7994/7458/7693/55269/55818/122830/7844/171023/7326/54915/5430/54893/3839/10342/51552/163051/5971/6670/80829/57403/7673/8027/51343/57649/1453/51729/26994/22850/54764/5128/85364/80204/64746/79720/8493/2673/26524/57154/155435/56270/139231/25820/51320/6421…
ZNF428	162	-0.464006	-0.95421	0.601449	1	1024	tags=22%, list=17%, signal=19%	51026/11021/8882/10959/90580/79845/26528/30001/79039/506/10438/811/58515/7341/7323/79571/3459/84844/57708/6643/10914/4189/51714/5504/10949/10250/29080/476/550631/10440/830/5500/9218/23204/801/51646
TCF4	62	0.316582	0.926441	0.604651	1	850	tags=15%, list=14%, signal=13%	120534/11198/10944/64710/6726/84081/7707/7443/55285
BAZ1B	489	-0.470945	-0.970139	0.605395	1	1120	tags=24%, list=19%, signal=21%	64783/157769/23394/6709/55671/10746/10116/7871/5929/6198/54861/55870/54882/1399/80232/27125/23186/6651/149371/55922/4928/9883/403341/55054/10725/22894/2512/80818/63925/9329/7159/65117/9818/1659/3189/26959/4204/7812/140901/10059/9451/23169/5007/9673/55279/84851/1859/23215/7109/147339/126731/166968/7403/3313/55175/91746/51755/7994/5927/29072/22992/79612/55269/25909/55818/283624/90268/9807/23360/234…
E2F8	31	0.344869	0.911134	0.606695	1	2303	tags=71%, list=39%, signal=43%	348235/54908/151246/7112/10592/4175/9949/23310/55345/10051/163786/84515/9562/79980/317671/253714/129642/43/29127/81930/55706/11169
CSRNP1	293	-0.468944	-0.955414	0.609045	1	407	tags=10%, list=7%, signal=9%	51729/26994/2872/4794/253943/79720/7316/80149/80311/415116/9929/6046/4209/90007/9308/51320/9567/1847/144108/5187/25976/79647/23764/51307/29950/7798/1844/3164
RUNX1	19	0.367768	0.86812	0.613861	1	347	tags=11%, list=6%, signal=10%	440574/6717
KDM1B	95	0.30848	0.951635	0.617647	1	2484	tags=62%, list=42%, signal=36%	8717/6480/23097/23596/54919/83852/22900/139818/9909/51112/23506/23550/23171/10999/91754/23317/23382/5532/55364/57486/26259/7023/84343/7024/28962/65220/2997/4200/6494/51479/55830/2595/6565/3717/4065/65123/29102/54431/1389/196527/349114/201255/23530/23170/56886/11260/3631/55706/9670/23509/9459/150465/7317/84893/24149/9690/51135/84910/5925
ARNTL	162	-0.459651	-0.94096	0.621677	1	912	tags=26%, list=16%, signal=23%	5290/26959/4204/253260/26092/55773/9770/7110/10308/51340/6775/3459/5927/9821/23774/2803/4780/57590/55041/9267/9541/440026/55031/149041/58490/23011/5926/51696/54469/23036/22931/221178/8556/142891/164/9263/29982/23670/6867/1105/51762/6932
RXRA	95	-0.444919	-0.903942	0.634173	1	806	tags=13%, list=14%, signal=11%	23401/165324/219855/79568/11025/64218/819/163051/51729/11171/163859/7798
THAP4	35	0.322014	0.877197	0.648402	1	1297	tags=26%, list=22%, signal=20%	79171/10443/9039/5709/151613/1537/6563/387921/5518
WDR82	173	-0.446556	-0.917258	0.650924	1	1445	tags=33%, list=25%, signal=26%	112637020/85369/619373/100009676/51654/7874/4947/6094/342371/5976/56342/284352/100506436/26205/205564/388341/4670/27297/63906/79803/64783/9667/100652748/2923/375035/79818/10270/11021/6774/1659/10438/79571/84844/7458/22992/23119/23774/91833/8552/25778/4097/24144/1778/10949/10658/26043/1453/6397/550631/9766/384/2521/6016/91355/7439/51621/57602
ZNF671	222	-0.440723	-0.916673	0.65493	1	1274	tags=29%, list=22%, signal=24%	117143/9878/205564/10001/7305/5495/147694/390980/4690/284309/79862/56990/5929/1022/23633/100652748/126070/10520/2553/79818/90411/10006/4928/148268/23168/80264/91120/9798/80818/23435/163590/6774/1659/59348/7695/59345/8874/165324/5927/7693/55030/23774/91833/25778/6047/7551/24144/9698/56605/64218/55031/58490/26043/163732/163051/10172/23036/54439/51276/51447/22835/23198/51710/10745/7561
IKZF4	378	-0.458873	-0.943874	0.659	1	1384	tags=33%, list=24%, signal=27%	64328/155061/10523/3200/8452/83548/200933/5525/114659/84444/5976/51322/163126/8509/64319/11011/26205/7536/5286/8812/124245/115426/79803/157769/23394/55671/284309/10116/8491/5501/112858/54880/23759/54882/8030/9349/80232/81603/23186/149371/10019/9883/473/10725/55095/26224/22894/80818/63925/5467/124583/9329/7159/22853/8570/9818/10605/84640/3189/10291/121665/140901/10838/23169/5007/22936/219333/9673/…
PKM	185	-0.440395	-0.906972	0.660843	1	986	tags=28%, list=17%, signal=24%	83608/7305/6882/5580/57711/9412/1022/58517/51187/10006/23168/10437/151056/53371/81/51562/7133/1060/55660/4848/100653515/94241/148423/219855/55959/3074/153222/226/55854/26036/257415/9541/64218/988/79026/55186/819/23036/7673/8027/10286/79180/476/51276/84146/1195/665/11171/51710/7431/81689
BRF2	63	-0.43297	-0.858625	0.661557	1	1253	tags=29%, list=21%, signal=23%	388341/27297/63906/9667/3954/84975/11066/29093/84844/81572/662/29115/24144/8834/384/51447/8480/7259
ZNF165	41	-0.441549	-0.850222	0.662893	1	1054	tags=27%, list=18%, signal=22%	4482/396/902/6500/84324/4848/58515/1452/10597/100126791/11100
POU2F2	30	0.341561	0.884649	0.664062	1	2273	tags=57%, list=39%, signal=35%	23596/1445/6404/23313/6039/5532/23625/79629/11024/4064/4542/58475/64231/85315/203427/147807/92799
ZNF275	362	-0.458264	-0.937748	0.669339	1	1219	tags=30%, list=21%, signal=25%	9265/5495/79803/157769/51104/23394/55671/284309/10116/57711/54880/54861/126070/54882/27125/23186/149371/9883/403341/148268/55054/10725/22894/10657/80818/63925/124583/9329/7159/10605/84640/3189/9655/7812/121665/7189/140901/23169/85365/5007/1408/9762/1859/7109/147339/126731/166968/55175/51755/7994/7458/29072/22992/7693/55269/55818/90268/9807/55030/23774/23469/91833/122830/7844/2956/171023/5295/5116…
FOXP3	27	-0.433553	-0.813954	0.678812	1	397	tags=7%, list=7%, signal=7%	550631/6932
ZNF527	177	-0.432686	-0.896444	0.681679	1	1223	tags=23%, list=21%, signal=19%	7305/147694/390980/10988/284309/79862/57711/9412/51441/5929/126070/10520/168374/148268/91120/266812/55270/10059/23169/7695/51340/51163/51388/7693/226/6875/1964/65986/2956/26036/988/163051/10172/7673/51276/51710/10926/7561/144108/54941/81689
PWWP2B	169	-0.443144	-0.897395	0.687179	1	463	tags=9%, list=8%, signal=8%	79026/10250/10286/282991/29080/10440/50640/7334/830/57701/55701/5500/23204/5718/51646
ZNF764	161	-0.429678	-0.881925	0.687371	1	1578	tags=39%, list=27%, signal=29%	54897/9925/10847/6433/22903/22993/79673/23252/158586/23239/25865/10137/64328/155061/114659/5976/163126/8509/284352/26205/51306/79803/51104/23394/115509/284309/112858/56257/54880/23759/54882/149371/9883/80818/124583/9329/7975/121665/140901/10838/23169/85365/5007/1859/55175/22928/51755/22992/55818/23774/122830/7844/171023/5430/80829/51343/54764/5128/85364/80204/155435/25820
ZNF781	17	-0.451453	-0.808292	0.687776	1	332	tags=18%, list=6%, signal=17%	54971/9349/22835
SLC2A4RG	223	-0.443166	-0.90533	0.69254	1	964	tags=15%, list=16%, signal=13%	54556/6500/8570/26528/101927275/10291/84324/5912/29093/1060/506/4848/58515/7341/56681/5927/1452/9541/55206/143384/55031/5926/163732/5611/57862/23099/55330/5500/11100/6303/2117/6018/5718/94056
BMI1	21	0.354004	0.847707	0.695971	1	288	tags=14%, list=5%, signal=14%	55109/11335/7155
SETMAR	214	-0.433172	-0.896776	0.697462	1	1067	tags=22%, list=18%, signal=19%	149371/168374/148268/22894/2512/10657/80818/124583/9329/253782/10605/84640/9655/140901/3612/10838/23169/1859/6049/166968/55175/51163/51755/51388/7693/55269/55818/122830/29946/2956/7326/11236/79868/163051/7673/22911/54764/5128/85364/51276/253943/8493/56945/23411/144108/6421/79647
FOSL2	90	-0.430958	-0.864548	0.701087	1	668	tags=23%, list=11%, signal=21%	2077/9846/6455/9267/55625/84957/51343/1453/58476/10397/2683/26524/23308/56270/415116/9929/51621/4209/90007/129807/8178
NAIF1	83	-0.429836	-0.857515	0.701657	1	1743	tags=48%, list=30%, signal=34%	64207/7016/55113/140459/57050/146923/90324/54805/11070/10847/79165/56160/93624/5976/163126/284352/84247/79803/115509/112858/56257/6734/81875/81603/149371/23062/1050/124583/90580/50628/57332/10291/54516/23401/4247/22928/55625/85364/55330/11100
ZNF528	78	0.289391	0.896046	0.714286	1	2415	tags=53%, list=41%, signal=31%	2073/100129842/10521/9849/9988/5289/23269/54799/80095/9330/22862/146198/90987/90957/57337/55125/56916/147991/23390/55668/255520/65251/23503/400720/84765/57614/146050/55717/150759/64081/65250/889/285349/26152/257218/57573/57508/57534/6872/84128/23369
ZNF880	25	0.325415	0.8214	0.716535	1	37	tags=4%, list=1%, signal=4%	6742
E2F1	120	0.275537	0.892212	0.716981	1	258	tags=8%, list=4%, signal=7%	9978/9967/114769/10944/51538/203068/440574/29901/91612
TRAFD1	36	-0.420976	-0.798442	0.717604	1	655	tags=14%, list=11%, signal=12%	8552/6047/143384/84275/8531
ZNF565	391	-0.442479	-0.914137	0.720441	1	1457	tags=30%, list=25%, signal=25%	7690/10772/51277/112637020/85369/619373/378938/100009676/51654/114799/79680/23042/80018/4193/54971/54986/9100/23276/9529/10181/9445/441150/29896/55178/28990/55969/100506436/106481790/9878/205564/388341/6430/23014/6627/27297/63906/51108/396/390980/6921/9667/84447/25798/10933/51441/5929/1022/51399/23633/100652748/55870/9349/79818/3954/6651/902/5717/7040/23435/11066/163590/6774/116842/54556/6500/165…
FOXP4	35	-0.420548	-0.792245	0.726098	1	1378	tags=34%, list=23%, signal=26%	10523/84444/64319/7536/9349/124583/8570/10291/5430/80758/5819/11100
KLF7	89	-0.406362	-0.819896	0.741474	1	1119	tags=35%, list=19%, signal=29%	54861/27125/10006/55054/163590/571/83452/5290/3845/29919/94241/23215/147339/126731/7994/29072/25909/90268/9267/5295/54893/26043/10672/2908/9595/6397/6477/8556/142891/11214/9859
FOXK1	212	-0.417667	-0.865957	0.743642	1	1042	tags=28%, list=18%, signal=24%	9883/403341/55054/11021/9798/6774/1659/114789/7975/4204/140901/10838/51061/5007/9673/1408/9762/7109/79571/51755/7994/7458/29072/22992/23119/90268/9807/23774/91833/9619/4097/171023/9267/1778/55625/84957/54893/58490/10658/26043/5971/6533/51343/57649/1453/550631/9766/80204/11214/26524/57154/155435/56270/91355/51621/25820/57602/9567/9043
CUX1	121	0.278169	0.908319	0.745455	1	468	tags=7%, list=8%, signal=6%	9978/114769/1021/4707/440574/23097/2120/408
MYBL2	25	-0.399439	-0.737871	0.748971	1	977	tags=16%, list=17%, signal=13%	7027/8570/11163/11100
PRDM4	482	-0.443415	-0.913406	0.76	1	1123	tags=26%, list=19%, signal=23%	54880/54861/6734/54882/8030/80232/27125/23186/149371/79666/168374/9883/403341/148268/55054/10725/26224/22894/80818/63925/571/124583/9329/7159/22853/9818/10605/84640/3189/26959/9655/7812/7189/140901/3612/10838/9451/901/23169/26092/5007/219333/56255/1408/1859/6049/7109/219988/23219/166968/7403/55175/51340/64376/51163/51755/7994/7458/29072/22992/55269/55818/283624/90268/23774/23469/9341/122830/65986…
ARID5B	38	-0.397623	-0.756234	0.761421	1	1442	tags=34%, list=25%, signal=26%	5082/54971/9100/51742/9878/23014/80264/6774/54556/101927275/283635/143384/54900
ZEB2	72	-0.388744	-0.781605	0.763842	1	612	tags=10%, list=10%, signal=9%	23062/403341/54790/57590/51164/80204/57532
ACTR5	463	-0.441601	-0.905348	0.764765	1	1042	tags=20%, list=18%, signal=18%	9883/148268/55054/10725/55095/22894/2512/10657/80818/63925/124583/9329/7159/7975/3189/9655/7812/140901/10838/23169/5007/114883/219333/1859/7109/147339/166968/7403/55175/51755/7994/29072/22992/7693/55269/6875/55818/283624/90268/9618/122830/7844/2956/171023/5295/54915/5430/54893/168850/6670/80829/22911/64225/51343/57649/1453/22850/84132/54764/1654/220359/5128/85364/7799/8556/253943/80204/2033/81566…
ZNF668	115	-0.394916	-0.805102	0.76607	1	1339	tags=32%, list=23%, signal=25%	9445/55178/5202/151903/106481790/29928/23014/27297/6921/9667/3954/5639/84975/10270/51188/5717/11066/54556/6500/7090/29093/51335/105369758/81572/29115/1452/6047/24144/55206/60673/8834/10250/51228/165918/5049/100129347/8531
MAFG	163	-0.401332	-0.828336	0.768595	1	846	tags=23%, list=14%, signal=20%	90809/5007/9673/1408/7109/22992/8878/7328/90268/23774/55041/9267/1778/51164/55625/126298/84957/58490/10658/10620/80829/6533/51343/1453/23099/1198/9766/80204/164/51132/57154/6016/1499/6867/51621/25820/9043
ZNF627	345	-0.434509	-0.891084	0.76977	1	1199	tags=28%, list=20%, signal=24%	157769/51104/23394/10988/55671/4690/284309/9643/10116/8491/56990/54880/6198/126070/10006/9337/9861/168374/80264/51026/26224/22894/80818/53371/9818/10605/84640/5290/26959/7812/3612/10059/55660/253260/59348/114883/55279/55773/8036/51118/1859/7695/6049/7110/10308/147339/5537/23219/166968/116254/51340/51163/9821/7693/9528/55818/283624/23360/23469/122830/10208/5701/4780/9541/3156/5520/9107/55602/3839/…
ETS1	19	-0.406899	-0.732516	0.773723	1	252	tags=21%, list=4%, signal=20%	3566/23670/51429/6932
KLF1	19	0.327808	0.759451	0.779817	1	2221	tags=68%, list=38%, signal=43%	8328/3145/10098/6563/9949/3029/9562/643008/317671/5498/43/1182/7389
TAL1	19	-0.396228	-0.714809	0.780842	1	465	tags=16%, list=8%, signal=15%	10171/6513/7855
KAT2B	161	-0.392137	-0.813066	0.784679	1	697	tags=9%, list=12%, signal=8%	226/25897/8301/292/11163/6513/7855/1654/10284/51099/10625/57018/51430/55544
KDM6B	338	-0.418631	-0.868118	0.795796	1	498	tags=14%, list=8%, signal=14%	5966/10672/5971/51696/6533/57403/51343/57649/1453/84981/26994/84132/2872/54764/4794/5128/7799/8556/2033/58476/164/5606/51274/9263/23198/2683/1604/79720/6497/57154/80149/155435/415116/25820/90007/9308/9567/9043/51762/57801/79647/84807/9819/9441/27342/8178/23764/694/8013
ZNF433	93	-0.381487	-0.765065	0.799346	1	1445	tags=32%, list=25%, signal=25%	112637020/619373/100009676/79680/9445/28990/100506436/106481790/9878/205564/388341/6627/27297/9667/79818/11066/6774/116842/54556/51335/105369758/81572/29115/8552/1452/100126791/384/165918/7259/7439
AHDC1	292	-0.416605	-0.859248	0.800601	1	1386	tags=33%, list=24%, signal=26%	9261/64328/155061/10523/8452/10865/401505/114659/84444/5976/51322/10048/8509/64319/9294/284352/23164/11011/26205/7536/5495/157769/51104/23394/6709/56888/8491/54880/54882/27125/23186/23299/51188/9883/403341/473/10725/55095/10657/80818/63925/55700/285093/124583/90580/7159/8570/121665/140901/5007/219333/9673/1859/7109/219988/23219/7403/51755/7994/29072/22992/26051/55269/55818/283624/9807/9618/2077/9…
SATB1	28	0.302827	0.762005	0.804	1	1423	tags=43%, list=24%, signal=33%	51574/55153/9039/4208/7707/55285/55599/8481/55900/10199/25957/8545
ZBTB24	19	-0.403844	-0.713787	0.805596	1	1140	tags=32%, list=19%, signal=26%	5501/112858/81603/22928/864/56905
E2F5	96	0.270978	0.866037	0.807229	1	1091	tags=24%, list=19%, signal=20%	29081/9967/126382/79064/23059/91612/100874110/6717/9570/50840/81493/91151/9789/27030/171568/10436/7918/11333/6302/114044/29095/81890/348995
CCDC17	390	-0.421088	-0.873664	0.808	1	844	tags=17%, list=14%, signal=16%	5007/219333/2081/9673/55279/1859/7109/23219/166968/7403/55175/91746/51755/7994/29072/3939/22992/55269/25909/55818/283624/90268/9807/23774/91833/140735/4780/7844/171023/292/5520/51164/54893/26043/25948/23019/51696/286006/6670/64225/51343/57649/1453/54764/7799/8556/80204/2033/164/23198/8493/57701/51132/57154/23411/155435/139231/25820/26512/9567/9043/57210/5930/6421/23387/57532
CHRAC1	70	-0.365448	-0.73382	0.808924	1	1004	tags=19%, list=17%, signal=16%	92345/10983/10438/105369758/118460/7326/11236/51444/7534/51729/384/7439/5879
CBX6	10	-0.375797	-0.645551	0.81141	1	840	tags=50%, list=14%, signal=43%	57169/8509/80301/9770/84957
ZNF417	233	-0.404424	-0.832321	0.814703	1	1441	tags=30%, list=24%, signal=24%	85369/100128537/374879/100009676/6314/7874/81669/23042/10181/6094/342371/5976/284352/100506436/51306/23102/205564/26093/63906/64783/23394/284309/100874272/7871/126070/55870/54882/375035/79818/149371/148268/55054/11021/22853/1659/10838/5007/84851/7109/79571/55175/51755/29072/7693/23119/90268/23774/91833/8552/55096/25778/7551/1778/126298/54893/10658/26043/100507433/1453/550631/9766/164/105372481/25…
SOX12	155	-0.388948	-0.793525	0.823164	1	187	tags=3%, list=3%, signal=3%	6303/5791/10135/5329
ZNF629	228	-0.390423	-0.808415	0.831472	1	706	tags=12%, list=12%, signal=11%	22992/26051/9807/2077/23774/9846/6455/9619/171023/1778/5430/54893/80829/51343/57649/1453/85364/80204/79720/57701/26524/57154/155435/56270/25820/9043/801/23387
ZBTB9	41	-0.359261	-0.693054	0.832704	1	1251	tags=54%, list=21%, signal=43%	1660/4798/10664/152992/55659/27097/162239/23252/124245/23394/115509/284309/157638/81875/148268/80818/9329/140901/10838/23169/51163/171023
ELK3	21	0.303794	0.712126	0.840989	1	2085	tags=38%, list=35%, signal=25%	23506/9868/6197/64921/80067/372/55144/196527
ARNTL2	32	0.290354	0.762075	0.845188	1	130	tags=3%, list=2%, signal=3%	10245
ZNF511	178	-0.380788	-0.784909	0.845201	1	769	tags=14%, list=13%, signal=13%	7341/9585/57708/10914/1964/55854/25897/257415/9541/51535/55186/5878/10949/5926/10250/9774/29080/830/9584/1195/5500/665/10926/51430/51646
CREB3L2	461	-0.414348	-0.854452	0.847153	1	1046	tags=22%, list=18%, signal=20%	51188/9883/403341/473/10725/55095/10657/80818/55700/124583/9329/7159/6500/8570/253782/10605/84640/10291/9655/121665/7189/140901/10838/55249/85365/5007/5867/219333/51465/1859/7109/5537/219988/23219/166968/7403/105369758/51755/7994/22992/26051/55269/55818/9807/2077/9825/9846/122830/6455/55122/7844/171023/7326/256586/51164/54915/5430/3087/468/54893/10342/51552/10672/51696/6670/80829/57403/57649/1453…
ZNF581	147	-0.360463	-0.745057	0.855042	1	1387	tags=20%, list=24%, signal=16%	4124/80018/4193/1933/10957/9445/441150/29028/79016/396/84447/6207/55870/9134/66036/51162/8420/5867/55294/5927/55096/25778/7386/55206/79183/1655/84973/6867/1998/527
RING1	495	-0.420602	-0.86435	0.855145	1	1038	tags=19%, list=18%, signal=17%	79577/23168/1977/5717/51026/25949/388569/124491/10959/54556/6500/53371/26528/81/84324/51562/30001/79039/29093/1060/506/55660/4848/10438/54918/8036/811/58515/7341/9585/7323/728294/3459/56681/57708/6643/9530/2803/84945/55854/1452/9689/4189/257415/51714/9541/51535/51444/143384/440026/5504/79026/55186/10949/51362/23011/5926/64282/5611/54469/10250/9774/10286/388272/282991/22931/29080/476/10440/8780/73…
PHF20	251	-0.393532	-0.808475	0.857576	1	1054	tags=18%, list=18%, signal=15%	902/4928/23168/80264/5717/23435/124491/6774/6500/101927275/10291/84324/29093/9208/506/4848/59348/6993/58515/8874/5927/2803/8552/1452/6047/387082/55206/51535/143384/55031/5926/163732/5611/57862/165918/64859/11214/22835/5500/5049/527/23204/2117/5718/94056
CHMP1A	188	-0.375713	-0.776414	0.858163	1	1700	tags=35%, list=29%, signal=25%	80335/23207/157922/140459/146923/9842/3927/369/27097/8729/488/55627/114781/11070/23275/22993/100507303/85456/54436/4627/25865/2000/9261/6094/84444/342371/5976/80148/8509/5202/284352/26205/4670/1164/79803/6709/6734/9349/11021/63925/124583/90580/79039/121665/140901/10838/7109/7458/22992/9807/23774/6455/171023/1778/55625/84957/10949/51343/1453/476/85364/57701/56270/51621/9150
CHD4	180	-0.377553	-0.774818	0.85947	1	610	tags=6%, list=10%, signal=6%	2956/171023/1778/126298/10658/26043/100507433/550631/2521/6711/10049
ZNF346	266	-0.381753	-0.793831	0.865657	1	226	tags=2%, list=4%, signal=2%	10221/389792/84275/527/91663/10365
MECP2	333	-0.399255	-0.822067	0.866733	1	889	tags=17%, list=15%, signal=15%	140901/10838/253260/5007/9673/55773/9762/23215/7109/8874/7403/91746/7994/5927/29072/9821/226/7328/283624/9807/23360/23774/2803/91833/4780/171023/9698/9267/1778/5520/56605/440026/55031/58490/26043/5966/51696/23036/6533/64225/51343/1453/54764/51276/8556/142891/164/23198/105372481/51132/57154/155435/51710/25820/9043/23429/23387
LMNB1	274	-0.388406	-0.79607	0.869739	1	542	tags=9%, list=9%, signal=9%	5504/79026/10949/90390/10597/819/10250/10286/282991/29080/476/10440/7334/80219/23484/5500/9218/5049/23261/10289/5805/10209/5718/51526/51646
ZNF772	399	-0.398718	-0.82321	0.87013	1	898	tags=16%, list=15%, signal=14%	9655/7812/7189/10838/23169/5007/114883/94241/219333/1859/7695/59345/6049/147339/166968/55175/51755/7994/29072/7693/55269/226/6875/55818/90268/55030/23469/122830/7844/2956/171023/5295/126298/54893/10342/26043/163051/10172/6670/80829/7673/8027/6477/22850/54764/5128/51276/80204/1396/9859/2673/51132/49854/7525/139231/7561/51320/221079/6711/6421/163859/57532
MEF2B	213	-0.368329	-0.76129	0.871976	1	819	tags=20%, list=14%, signal=18%	55773/8036/7110/245711/7323/3313/56681/57708/9821/2803/55854/25897/9689/26036/9541/55186/55031/5926/221037/9318/8087/9774/50999/23099/8774/54439/8780/830/84146/9584/1983/5500/9218/5903/64645/1105/1997/9589/6018/2959/5718/51646
PARP2	447	-0.410025	-0.836026	0.88	1	1241	tags=26%, list=21%, signal=22%	6430/6627/29028/2744/83608/7305/147694/3178/390980/6882/10988/4690/284309/9643/57711/9412/51441/5929/1022/5411/6198/126070/10520/58517/51187/10920/10006/6651/9861/51503/55922/10042/148268/23168/22894/23435/53371/65117/10605/51562/3612/1060/10059/55660/4848/262/25977/114883/57062/55773/60488/51118/7695/7110/165324/9585/3313/51340/64376/51163/8533/57708/7693/79612/226/23360/23469/55854/25897/10208/…
MBD2	28	-0.353341	-0.648152	0.880682	1	1362	tags=46%, list=23%, signal=36%	79627/8428/7805/5914/55013/9445/4067/25798/7133/3074/81572/79180/51447
STAT5A	207	-0.369329	-0.76354	0.882947	1	310	tags=5%, list=5%, signal=5%	79720/84973/155435/9929/51320/9567/3398/801/6711/6421/51307
MEF2A	68	-0.326619	-0.655013	0.883041	1	1037	tags=12%, list=18%, signal=10%	473/9818/3845/219333/283624/8301/10892/221079
SIRT7	24	-0.350051	-0.63062	0.884286	1	1062	tags=17%, list=18%, signal=14%	10270/23062/4097/84957
FOXP1	450	-0.407135	-0.836925	0.886	1	1093	tags=24%, list=19%, signal=21%	51053/9349/51187/10920/10006/6651/51503/902/51188/10042/79577/23168/1977/80264/5717/7040/56902/23435/11066/124491/10959/116842/54556/6500/7507/81/101927275/84324/51562/29093/1060/506/4848/58526/100653515/59348/57062/55294/58515/7341/9585/64795/56681/5927/57708/23528/81572/10914/2803/1452/51669/9689/387082/23160/26036/4189/257415/9541/55206/51535/988/143384/5504/64112/55186/55031/1655/5926/221037/…
CEBPA	25	0.268074	0.676656	0.88764	1	716	tags=16%, list=12%, signal=14%	1628/150223/1445/149603
IRF8	31	-0.325033	-0.613538	0.892388	1	757	tags=16%, list=13%, signal=14%	219855/3074/5271/64218/8027
SETD6	189	0.252304	0.882063	0.892691	1	1483	tags=32%, list=25%, signal=25%	56652/8607/1788/55131/100874110/80072/4817/84307/166378/100132707/25961/50840/81493/9277/641339/91151/124401/78996/81844/55738/171568/124790/56339/10436/55245/11128/9906/84909/22984/23269/84276/7918/56919/11333/6302/114044/8602/84283/55846/9761/51490/285855/197407/201181/7589/8629/197342/374920/22880/5281/54944/14/343099/80755/23404/55687/93594/161424/29911/5198
ZNF408	257	-0.378005	-0.774722	0.89336	1	1055	tags=32%, list=18%, signal=27%	10019/4790/9883/55054/10657/80818/100507347/63925/55700/124583/90580/9329/7159/10605/84640/29777/121665/7189/140901/55249/51061/85365/5007/1408/9275/9762/7109/219988/23219/51163/51755/7994/7458/22992/26051/7693/55269/10978/55818/23774/91833/9825/122830/6455/171023/54915/3087/468/6924/51552/5971/160760/80829/57403/51343/57649/1453/51729/22850/54764/9766/85364/5250/80204/81873/79720/8493/26524/5715…
GLMP	288	-0.379861	-0.779495	0.894578	1	819	tags=18%, list=14%, signal=16%	55773/148423/23215/7110/165324/91746/5927/9821/7328/29115/23360/2803/91833/55096/25778/26036/9698/9685/5520/56605/64218/143384/440026/55186/55031/51362/58490/10658/26043/5926/5966/54469/23036/57862/23099/6477/8774/54439/142891/164/23198/9584/11171/5903/9043/1105/2117/23429/9589/2107/6018/5718
ZMYND8	163	-0.346308	-0.710152	0.895918	1	14	tags=1%, list=0%, signal=1%	1655/284207
TEF	23	0.286061	0.701867	0.898182	1	771	tags=13%, list=13%, signal=11%	1376/84861/93973
TIGD6	56	-0.316025	-0.62703	0.900232	1	950	tags=16%, list=16%, signal=14%	10983/4855/10438/105369758/84844/550631/384/10923/7439
ZNF737	49	0.25189	0.701142	0.903226	1	1838	tags=45%, list=31%, signal=31%	339500/84436/7700/340252/23269/81571/54799/80095/9330/7644/90987/9881/56916/57695/56242/27032/54925/7617/148213/65251/400720/90649
USF1	82	-0.329551	-0.65567	0.907982	1	1440	tags=29%, list=24%, signal=22%	100128537/100009676/4947/6094/5976/284352/100506436/26093/100874272/375035/11021/114789/128866/10438/90809/79571/84844/4097/1778/79026/10949/550631/10923/7439
TRERF1	129	-0.340903	-0.695379	0.908228	1	296	tags=15%, list=5%, signal=14%	8896/1022/6780/9349/51503/5717/6500/26528/84324/29093/58515/7341/56851/1452/163732/55701/5500/23204/5718
ZNF407	486	-0.403723	-0.827067	0.91009	1	1120	tags=20%, list=19%, signal=17%	6198/54861/126070/6207/55870/54882/375035/79818/6651/149371/148268/79577/55054/22894/23435/66036/65117/6103/1659/7812/10059/10838/23169/5007/114883/57062/4217/54790/55294/84851/7695/23215/59345/7110/245711/147339/3313/79571/55175/51340/91746/51755/7994/5927/29072/23528/226/25909/55818/90268/23774/23469/2803/8552/55096/25897/101928865/25778/2956/7296/26036/1778/9685/5295/55206/79183/55031/149041/1…
HIVEP2	58	-0.320765	-0.629331	0.910152	1	1025	tags=12%, list=17%, signal=10%	55095/4204/219333/283624/4780/10892/25820
ZBTB4	118	-0.323133	-0.661247	0.911579	1	351	tags=5%, list=6%, signal=5%	9807/2077/81566/57701/9150/23387
ZNF227	372	-0.377553	-0.778731	0.917753	1	1227	tags=23%, list=21%, signal=20%	2744/7305/5495/147694/23394/55671/4690/284309/57711/9412/7871/5929/6198/54861/126070/10520/55870/54882/55922/148268/79577/80264/91120/22894/80818/53371/9818/5290/3612/10838/23169/59348/5007/114883/94241/84851/7695/23215/6049/7110/147339/165324/51340/51163/7994/5927/29072/7693/226/55818/23469/91833/122830/5701/2956/7296/7551/24144/9698/56605/988/26043/163732/163051/10172/23036/7673/8027/22850/5476…
ZNF324	85	-0.315705	-0.637558	0.919827	1	850	tags=14%, list=14%, signal=12%	10438/84851/51335/79571/105369758/23119/8552/79183/550631/384/2521/7439
PYGO2	102	0.256183	0.807943	0.921875	1	1710	tags=41%, list=29%, signal=30%	55109/1376/90353/84964/5994/81628/9546/84861/4221/10454/10444/7343/5709/5869/23506/10025/57470/23550/9416/83746/90987/118424/84219/23338/9656/55687/9278/88745/55311/2733/80067/80347/6666/93643/7024/80772/22937/57326/644096/9203/2909/3984
ZNF576	66	0.270608	0.787491	0.923077	1	1243	tags=27%, list=21%, signal=22%	79064/100874110/4817/25880/50840/81493/91151/78996/171568/124790/7918/6302/114044/29095/285855/201181/7589/197342
ZNF544	12	0.280301	0.590406	0.923077	1	2407	tags=92%, list=41%, signal=54%	100129842/7644/148103/56242/7617/148213/90594/84911/285349/57573/100101467
SCMH1	88	0.247057	0.767277	0.925532	1	1726	tags=31%, list=29%, signal=22%	27306/83879/7102/4066/29965/8698/123096/100190939/7318/57492/5709/55833/57506/84532/9331/23382/54956/64798/24146/5198/100652865/50861/22937/636/57326/9203/64773
GZF1	444	-0.385007	-0.795584	0.927073	1	758	tags=17%, list=13%, signal=16%	7403/55175/91746/51755/7994/7763/29072/22992/55269/25909/55818/283624/90268/23469/27107/7844/8301/55041/292/3156/51164/9107/84957/54893/3839/2181/10672/160760/51696/151987/6670/80829/64225/57649/54764/84919/1654/5128/8556/9792/253943/80204/2033/164/64746/2673/204851/10625/51132/57018/57154/49854/6016/1499/80311/6867/23261/139231/56929/29979/25820/6046/51320/9567/9043/51762/4783/25976/6421/57532/2…
PHF19	464	-0.376547	-0.780872	0.936	1	722	tags=12%, list=12%, signal=11%	5927/57708/9530/9528/56851/2077/2803/7718/1452/387082/4189/257415/51714/9541/55206/51535/143384/440026/468/5878/10949/10597/5926/64282/163732/5611/10250/282991/476/10440/51228/830/80219/165918/9584/7846/57701/55701/5500/665/9218/84973/5049/11100/6303/84275/9709/23204/801/9589/9262/5718/51646/94056
NFKB2	332	-0.370551	-0.765864	0.936874	1	710	tags=16%, list=12%, signal=15%	92162/22992/8878/7328/55818/9807/2077/23774/9846/6455/602/7844/171023/9267/51164/84957/54893/10342/5966/5971/51696/80829/6533/57403/51343/57649/1453/2872/54764/4794/5128/8556/80204/2033/58476/164/23198/2683/51132/57154/80149/155435/415116/25820/9567/3383/9043/51762/23135/129807/84807/8178/23764/2355
ZNF672	361	-0.363655	-0.74984	0.937	1	781	tags=11%, list=13%, signal=10%	58515/7341/7323/998/7417/57708/9530/662/56851/1452/23160/7170/257415/5504/90390/5611/5862/8834/10250/10286/388272/282991/29080/476/10440/7334/80219/9584/10284/57701/55701/5049/23261/10209/9150/57210/23204/23387/9589/5718/51526
DIDO1	476	-0.383999	-0.790164	0.937063	1	844	tags=12%, list=14%, signal=12%	5007/2081/9673/84851/1859/7109/147339/7403/55175/51755/7994/29072/22992/55269/23119/55818/283624/90268/9807/23360/23774/91833/140735/9619/4097/171023/9698/9267/1778/126298/54893/10658/26043/1119/23019/51343/3995/1453/54764/80204/2033/81566/164/23198/57701/2673/51132/57154/155435/51621/25820/51320/9567/9043/9150/57210/6421/23387/57532
ZNF707	79	-0.301957	-0.613081	0.937847	1	850	tags=10%, list=14%, signal=9%	10438/79571/23119/23774/1778/550631/7439/9150
ZNF496	237	-0.33684	-0.689595	0.938446	1	378	tags=12%, list=6%, signal=12%	51188/9883/55095/10657/80818/51162/90580/9329/253782/9655/79039/10838/55175/7458/22992/7693/55269/171023/10949/85364/79720/26524/84973/155435/9929/51320/801/6711/51307
DAPK3	115	-0.303019	-0.609473	0.940107	1	1015	tags=26%, list=17%, signal=22%	4627/201965/100009676/283687/124044/6094/5976/56342/284352/100506436/26093/56257/375035/11021/10959/114789/128866/10438/79571/84844/2077/1778/10949/476/550631/830/10397/10923/57701/7439
ZBTB7B	176	-0.320515	-0.654114	0.940695	1	1236	tags=23%, list=21%, signal=19%	126308/6627/6921/51639/5580/1022/9349/51187/10920/51503/23062/151056/6500/81/84324/7133/29093/54516/58526/100653515/3566/23401/7341/219855/7417/79568/81572/11025/604/257415/64218/79026/90390/819/79180/476/51447/10284/55701/11171/23261
ZNF184	173	-0.32782	-0.674555	0.941837	1	897	tags=25%, list=15%, signal=22%	7305/147694/10988/4690/284309/57711/9412/168374/55922/80264/22894/53371/7812/3612/10059/23169/7695/6049/166968/51340/51163/7693/226/10914/1964/23469/55854/122830/10208/2956/988/55602/55186/3839/9318/8087/7673/22911/3799/51276/1195/23411/9908/25843
ZNF362	196	-0.32386	-0.667249	0.946083	1	781	tags=16%, list=13%, signal=14%	902/473/4942/10657/7040/54556/6500/8570/10291/84324/5867/58515/105369758/22928/7417/100216545/29115/1452/5430/5611/57862/85364/384/2752/55330/11100/5805/6303/23204/1649/5718
AKNA	246	-0.333628	-0.690297	0.946247	1	1156	tags=20%, list=20%, signal=16%	8896/729515/10933/1022/56257/23759/51053/9349/10920/23299/51503/51188/1977/5717/388569/54556/6500/26528/81/84324/29093/54516/100653515/64333/10129/58515/7341/7417/81572/25874/56851/1452/10597/819/5611/10286/79180/57862/10440/7334/830/10284/57701/55701/23261/11100/23204/5718
SCML2	62	-0.287502	-0.578326	0.950588	1	1512	tags=31%, list=26%, signal=23%	79158/85021/4883/158586/11052/7188/56479/114659/79870/2744/57711/10657/253782/51143/10838/7693/2956/5128/9859
ZBTB38	22	-0.292293	-0.526714	0.953846	1	1181	tags=23%, list=20%, signal=18%	81555/66036/26092/64282/864
FOXH1	41	-0.284415	-0.551356	0.954321	1	397	tags=10%, list=7%, signal=9%	10438/550631/384/7439
BRPF3	345	-0.348859	-0.716784	0.957043	1	1123	tags=22%, list=19%, signal=19%	54880/54861/157638/54882/9349/80232/23186/5326/149371/51188/9883/10725/55095/26224/2512/63925/571/124583/9329/7159/22853/8570/84640/10291/140901/10838/9451/23169/5007/219333/1859/7109/219988/9921/166968/55175/51755/7994/100216545/29072/22992/55269/55818/283624/90268/9825/7844/171023/7326/54915/5430/54893/51696/6670/80829/11163/51343/57649/54764/5128/7799/253943/2033/8493/23411/155435/139231/6046/…
RELB	244	-0.336666	-0.689433	0.957704	1	730	tags=21%, list=12%, signal=19%	51755/7994/7458/22992/26051/8878/55818/23774/91833/122830/6455/602/171023/10342/58490/26043/25948/5966/160760/51696/80829/57403/51343/57649/1453/22850/84132/2872/54764/4794/9766/5128/80204/2033/164/23198/64746/79720/26524/57154/155435/56270/415116/25820/123720/9043/79753/23135/129807/2107/79647/9441
ZNF526	94	-0.291096	-0.596092	0.957871	1	2138	tags=52%, list=36%, signal=34%	57680/2580/64599/25/22907/54442/5534/57661/57591/22898/9785/7295/8295/55593/8897/23293/84726/22888/221937/57720/29888/57592/146923/3927/23013/8729/8085/55627/10847/22993/25865/10137/155061/5976/80148/8509/284352/79803/56257/54880/23759/23299/90580/7975/9807/23774/1778/51343/85364
MAZ	403	-0.353781	-0.73107	0.959041	1	406	tags=12%, list=7%, signal=12%	54556/6500/8570/7507/26528/81/101927275/10291/84324/55379/79039/29093/506/54516/283635/6993/58515/3459/56681/7417/118460/29115/56851/7718/1452/387082/9541/143384/10949/10597/5611/100126791/10440/55330/64859/5500/23261/11100/5805/6303/9709/23204/5791/9589/10135/5718/51526/94056
CHAMP1	285	-0.329757	-0.686818	0.959799	1	1209	tags=24%, list=21%, signal=20%	79803/80762/51104/23394/6921/10116/5501/112858/54880/8030/9349/81603/149371/79666/168374/51188/9883/473/22894/10657/11066/124583/54556/9329/6500/8570/90637/10605/84640/10291/84324/140901/29093/10838/8214/1859/7109/219988/58515/23219/166968/55175/105369758/51163/7417/100216545/118460/55269/9341/1452/7326/11236/54915/5430/51552/6670/100126791/85364/384/55330/8493/10284/23411/23261/11100/6303/23204/…
PLAGL2	264	-0.329229	-0.679608	0.959799	1	618	tags=19%, list=11%, signal=17%	1408/9275/1859/7109/219988/9921/55175/51755/7763/22992/27107/9825/55122/7844/171023/54915/5430/468/54893/51552/160760/8660/25819/57649/26994/2872/4794/7799/9792/253943/2033/58476/8493/80149/155435/80311/56929/29979/6046/4209/90007/51320/9567/144108/6421/57532/79647/9441/51307
NAT10	311	-0.328968	-0.680441	0.95996	1	111	tags=1%, list=2%, signal=1%	6421/1051/5329
ZGLP1	152	-0.30633	-0.627868	0.960663	1	873	tags=18%, list=15%, signal=16%	55660/253260/59348/8036/7110/10308/5927/57708/9821/2803/26036/9541/5520/440026/55031/149041/58490/23011/5926/5966/23036/54439/23198/123720/1105/9589/6018/27342
HIRA	200	-0.305596	-0.625763	0.962245	1	706	tags=18%, list=12%, signal=17%	6094/84444/342371/5976/8509/284352/100506436/26205/23102/64783/6921/6709/56257/375035/23299/51188/9883/55095/11021/63925/2081/7109/22992/55269/9807/171023/1778/10949/1119/51343/476/550631/57701/155435/51621/9567/23387
ZBTB46	13	-0.26201	-0.461873	0.962848	1	4346	tags=92%, list=74%, signal=24%	140700/26086/85414/51744/5064/57222/1953/125058/29904/9423/285346/6709
ZFP82	130	-0.295176	-0.603276	0.965517	1	564	tags=6%, list=10%, signal=6%	51535/10172/51276/84146/22835/7561/7431/54941
ZNF784	205	-0.312818	-0.646953	0.965587	1	1144	tags=17%, list=19%, signal=14%	10933/56257/23759/51053/9349/51503/51188/11021/388569/63925/124583/54556/6500/26528/50628/10291/84324/79039/29093/10838/54516/58515/7341/7417/1452/10949/5611/85364/57701/23261/11100/6303/9150/23204/5718
ZNF547	124	0.283643	0.94321	0.968521	1	738	tags=14%, list=13%, signal=12%	2079/9978/120534/7979/10944/128061/91612/6629/11340/6717/6726/5889/10775/122961/79717/9789/115106
ZNF223	313	-0.320596	-0.663526	0.970854	1	897	tags=14%, list=15%, signal=13%	7812/3612/10059/23169/5007/114883/55279/55773/1859/7695/6049/7110/147339/166968/51340/51163/7693/226/55818/283624/23469/122830/5701/7844/7551/163051/10172/7673/22911/64225/54764/5128/8204/51276/80204/1396/105372481/51132/23411/51710/9908/5903/139231/25820/221079
BOD1	202	-0.304687	-0.624777	0.971602	1	1046	tags=18%, list=18%, signal=15%	51188/473/10657/11066/54556/6500/8570/253782/10291/84324/29093/8214/5867/51465/9275/219988/58515/105369758/2230/9341/1452/55122/84230/54915/3087/468/6844/5611/100126791/384/81566/55330/5879/11100/6303/23204
ZNF91	204	-0.299381	-0.614211	0.9727	1	1040	tags=15%, list=18%, signal=13%	148268/23168/80264/91120/23435/6774/7507/4848/58526/59348/7695/59345/165324/5927/387082/51535/56605/163732/163051/100507433/10172/23036/79180/51276/84146/22835/51710/54900/7561/54941
ZNF367	44	-0.27227	-0.528568	0.97294	1	439	tags=20%, list=7%, signal=19%	143684/200933/5525/115426/29028/5501/26224/11163/51430
IKZF1	91	-0.27011	-0.541267	0.97377	1	910	tags=11%, list=15%, signal=9%	10291/5912/54516/23401/22928/7417/5271/57862/11100/8767
ZNF575	284	-0.310398	-0.640595	0.974874	1	859	tags=17%, list=15%, signal=15%	253260/10438/219333/55279/55773/8036/1859/6049/5537/23219/166968/7403/105369758/64376/84844/79612/23469/84945/10208/7844/7326/5520/9107/51444/10949/3839/168850/23011/51552/9318/151987/6670/64225/11163/26994/384/8780/64746/10923/7319/139231/7439/10289/25843/221079/64645/51762/5930
ZNF714	140	0.218409	0.722373	0.975	1	1854	tags=29%, list=32%, signal=20%	56898/11198/64710/10902/6688/132949/83448/340252/6596/23398/23637/221443/79886/57187/7644/64395/6605/5884/9025/91687/79876/55632/126003/80205/153396/8504/57102/54680/1736/157567/91750/5471/284443/112840/2186/84924/8886/84250/79980/84765
CBX7	30	0.236119	0.615861	0.97541	1	1112	tags=20%, list=19%, signal=16%	472/5690/127262/65981/1606/57658
ZNF790	56	0.227165	0.653248	0.975758	1	1443	tags=23%, list=25%, signal=18%	55791/25961/91151/28970/11128/114044/285855/339318/7589/222236/7586/23404/93594
NFE2L1	346	-0.333222	-0.688624	0.978979	1	1111	tags=18%, list=19%, signal=16%	2923/375035/51053/9349/51187/10920/23299/51503/23062/51188/1977/11021/8882/10959/54556/90580/6500/114789/26528/128866/84324/79039/506/100653515/10438/811/58515/7341/9585/7323/79571/84844/7458/22992/257415/1778/51535/5504/79026/5878/10949/90390/10597/819/10250/10286/282991/29080/476/550631/10440/85364/7334/830/10397/10923/57701/55701/5500/9218/23261/11100/23204/51646
NR2F6	57	0.216551	0.642034	0.979452	1	2409	tags=61%, list=41%, signal=37%	29901/1376/4221/51337/5709/51112/116138/10999/2068/118424/84315/23277/88745/55311/55643/80324/22937/9203/3984/79671/152002/6895/53615/10452/79724/10474/9670/81926/23509/215/7760/10919/26233/6878/7317
BAP1	350	-0.321423	-0.659744	0.980981	1	956	tags=15%, list=16%, signal=13%	22853/1659/7975/4204/79039/140901/10838/90809/5007/9673/1408/84851/7109/9921/79571/55175/728294/51755/7458/29072/22992/55269/23119/55818/90268/9807/23774/4097/171023/9267/1778/126298/84957/10949/90390/10658/26043/80829/51343/1453/550631/1198/9766/164/2521/57154/155435/51621/25820/6046/9567/6421
C11orf95	235	-0.29939	-0.618821	0.98191	1	1046	tags=13%, list=18%, signal=11%	51188/9883/55095/10657/124583/9329/8570/26528/10291/55379/79039/140901/7109/58515/55175/22992/55269/171023/10949/10597/85364/81566/8493/23261/9929/6046/11100/6303/51320/6421
ZNF518B	226	-0.300656	-0.619737	0.982897	1	1061	tags=16%, list=18%, signal=14%	168374/5597/80264/51026/26224/22894/26049/66036/10059/23169/26092/55279/23215/6049/7110/166968/51340/226/10914/23469/84945/25897/10208/9689/988/55602/55031/23036/9774/3799/8204/1983/23411/23670/10926/9908/1998
TIGD5	349	-0.310219	-0.636595	0.982966	1	424	tags=5%, list=7%, signal=5%	57862/22931/8780/50640/55701/11171/10289/64645/10209/1105/3091/5861/9589/6018/27342/2959/5718/51526
TFDP2	376	-0.321149	-0.660125	0.982966	1	843	tags=9%, list=14%, signal=8%	114883/57062/7695/59345/147339/165324/3074/7693/226/55030/11025/2956/7551/9698/56605/64218/7277/163732/163051/10172/7673/8027/9804/54764/51276/1396/22835/23198/7262/51710/10745/7561/163859/91663
TFDP1	68	-0.257193	-0.514021	0.984199	1	1280	tags=26%, list=22%, signal=21%	151903/6627/80762/9616/23633/23168/84324/55905/29093/7417/84933/81572/29115/1452/6047/11163/57862/6513
MYCL	22	-0.239972	-0.437403	0.984441	1	1163	tags=45%, list=20%, signal=37%	25939/27163/968/3784/3394/10437/219855/55959/3074/11025
ZBTB22	213	-0.291226	-0.600326	0.984894	1	1190	tags=18%, list=20%, signal=15%	6921/6709/51639/8896/10933/56257/51053/9349/51187/10920/23299/51503/51188/1977/55095/388569/54556/6500/26528/81/84324/29093/58515/7341/9585/7417/10949/10250/10286/282991/476/10440/7334/57701/55701/23261/23204/5718
ZNF687	310	-0.295043	-0.604926	0.985	1	683	tags=11%, list=12%, signal=11%	90268/9807/2077/23774/9846/6455/4097/9267/1778/55625/84957/5878/54893/10949/80829/6533/85450/51343/57649/1453/9766/85364/2683/79720/26524/57154/6016/155435/56270/51621/4209/9567/9441/8178/2355
CAMTA2	336	-0.311422	-0.638732	0.985972	1	907	tags=11%, list=15%, signal=10%	84324/55905/29093/54516/4848/64333/23401/58515/165324/7341/64795/219855/7417/79568/3074/81572/25874/29115/56851/1452/6047/64218/143384/79180/57862/165918/10284/55701/23484/5500/11171/9741/5049/23261/9589/5718/94056
NFATC3	411	-0.325538	-0.672881	0.985986	1	919	tags=11%, list=16%, signal=10%	84640/3189/7812/79039/7189/140901/23169/5007/1859/7109/147339/7403/55175/51755/29072/22992/55269/55818/283624/90268/140735/2956/171023/10678/54915/54893/23019/6670/80829/80204/81566/8493/2673/51132/155435/80311/139231/25820/6046/51320/221079/144108/6421/23387/57532
ZNF286A	38	-0.23543	-0.45121	0.986076	1	1506	tags=18%, list=26%, signal=14%	8731/7690/59343/5929/29967/988/23036
TERF2	155	-0.272118	-0.558124	0.986694	1	378	tags=4%, list=6%, signal=4%	85364/81566/57701/5805/9709/23387
ZNF217	321	-0.29251	-0.610779	0.986974	1	921	tags=19%, list=16%, signal=17%	7975/84640/26959/3845/7812/7189/901/5007/219333/56255/1408/1859/10308/147339/126731/7403/51755/7994/29072/55818/90268/23469/7844/136319/57590/8301/9267/3156/5295/51164/55625/54893/58490/168850/51552/10672/160760/51696/6670/80829/5128/9792/80204/164/64746/2673/26524/51132/57154/1499/155435/80311/6867/139231/56929/29979/25820/51320/9043/1027/196/57532
UBE2B	486	-0.341158	-0.702152	0.987013	1	969	tags=15%, list=16%, signal=14%	10959/116842/54556/6500/8570/7507/26528/81/101927275/10291/84324/55379/79039/29093/1060/506/735301/4848/58526/59348/283635/5867/6993/219988/58515/7341/9585/105369758/56681/7417/57708/81572/9530/29115/56851/1452/55122/387082/257415/9541/55206/51535/143384/10949/10597/5926/64282/5611/8834/10250/10286/282991/57862/476/100126791/10440/51228/830/80219/165918/11103/57701/5500/5049/23261/11100/5805/6303…
ZNF318	143	-0.263069	-0.534536	0.989637	1	907	tags=17%, list=15%, signal=15%	6921/51639/5580/8030/9349/81603/23062/84324/29093/54516/2081/132864/7417/3074/81572/3939/25874/90390/8834/79180/10284/56905/23261/11100
ZBTB47	255	-0.291354	-0.606379	0.98994	1	557	tags=5%, list=9%, signal=5%	64218/79026/90390/819/10250/476/7334/55701/23484/5500/11171/10209/5718/51526
ZNF460	285	-0.293083	-0.599523	0.99196	1	810	tags=9%, list=14%, signal=9%	84851/1859/147339/55175/51755/7994/29072/22992/55269/90268/171023/1778/126298/54893/26043/51132/6016/155435/80311/23261/29979/25820/51320/9567/6711/6421/57532
ING3	492	-0.32564	-0.672351	0.992	1	1094	tags=20%, list=19%, signal=18%	255919/51053/9349/10920/84975/51503/902/51188/10042/79577/23168/1977/4942/5717/7040/11066/124491/10959/116842/6500/8570/7507/26528/81/101927275/10291/84324/5912/29093/1060/506/4848/58526/100653515/59348/283635/5867/58515/7341/9585/64795/105369758/56681/7417/57708/81572/9530/29115/56851/2077/8552/1452/9689/55122/387082/23160/257415/9541/55206/51535/143384/5504/79183/10597/5926/64282/5611/8834/1025…
ZNF174	73	-0.242741	-0.484747	0.992179	1	476	tags=18%, list=8%, signal=17%	112858/56257/10657/80818/90580/8570/10291/58515/5611/85364/81566/11100/6303
NCOR1	67	0.203349	0.604778	0.992308	1	619	tags=10%, list=11%, signal=9%	84656/80208/27332/253143/4548/57551/143
NR1H3	60	-0.242897	-0.480399	0.992916	1	722	tags=8%, list=12%, signal=7%	5927/2803/9541/143384/9589
ETV6	188	-0.275009	-0.558217	0.99384	1	331	tags=4%, list=6%, signal=4%	51164/23019/9859/51132/25820/23387/57532
CBX3	400	-0.302754	-0.625887	0.994006	1	1075	tags=19%, list=18%, signal=16%	9337/5870/9861/79666/168374/5597/3344/51026/26224/22894/92140/92345/53371/3646/10983/548645/9818/10605/3189/7812/3612/10059/55660/262/10438/26092/55279/8036/51118/6049/23219/166968/51340/64376/84844/8533/6643/9528/10914/1964/23469/84945/55854/10208/5701/9689/11236/79868/51444/55602/3839/168850/7534/51552/9318/151987/6670/9774/22911/64225/29080/3799/830/64746/10923/23411/7319/10926/9908/139231/277…
ZNF135	30	-0.205195	-0.387663	0.994702	1	751	tags=27%, list=13%, signal=23%	619373/100009676/6094/100506436/388341/79571/100507433/550631
ERCC6L	167	-0.260137	-0.537418	0.994877	1	1061	tags=17%, list=18%, signal=15%	10988/284309/5501/5929/168374/9134/55329/22894/53371/9818/84640/10059/23169/6049/9585/3313/51340/51163/8533/25897/2956/988/55602/10171/11163/3799/23411/10926/51430
PLSCR1	14	-0.19373	-0.338752	0.995455	1	4747	tags=100%, list=81%, signal=19%	6772/129607/10561/11342/4599/83666/8743/51131/10010/5610/25978/5868/3459
TCF7L1	14	-0.173113	-0.301232	0.996983	1	4868	tags=43%, list=83%, signal=7%	84852/7786/112637020/100009676/100506436/105369758
ZNF142	455	-0.280965	-0.578043	0.997	1	1130	tags=16%, list=19%, signal=14%	112858/56257/54880/6734/23759/54882/8030/9349/81875/81603/23299/149371/51188/9883/473/55095/2512/388569/63925/124583/9329/6500/22853/8570/90637/26528/50628/10291/84324/55379/79039/140901/29093/10838/54516/23169/2081/1859/7109/219988/58515/55175/7417/51755/100216545/3939/25874/22992/55269/55818/90268/6455/171023/54915/5430/90390/10597/85364/2033/10284/57701/56905/23411/155435/23261/6046/11100/6303…
ZNF814	433	-0.296612	-0.609876	0.997003	1	839	tags=9%, list=14%, signal=8%	5867/283991/57062/51465/84851/51335/64795/105369758/7417/81572/29115/8552/1452/55122/387082/24144/55206/51535/143384/79183/84124/100507433/100126791/10440/384/51447/165918/11103/22835/100130476/7259/5049/23261/11100/527/23204/10370/7538
ZNF276	135	-0.231939	-0.471576	0.997908	1	810	tags=6%, list=14%, signal=5%	84851/79571/728294/1778/550631/2521/51621/9150
PATZ1	209	-0.223325	-0.463546	0.997974	1	1321	tags=20%, list=22%, signal=16%	5976/163126/5202/284352/23164/7536/4670/11143/84247/79803/51104/6921/56257/23759/81875/23299/9883/2512/10657/124583/90580/9329/8570/26528/50628/10291/84324/79039/140901/10838/58515/55175/22992/55269/171023/10949/85364/55330/11100/6303/23204
CREBZF	344	-0.263261	-0.543451	0.997994	1	723	tags=6%, list=12%, signal=5%	7763/226/283624/23360/23469/140735/7844/171023/23019/8834/6427/81566/57018/80311/139231/56929/26512/221079/57532/5329
TBX6	464	-0.289484	-0.594806	0.998002	1	550	tags=8%, list=9%, signal=8%	143384/440026/55031/51362/58490/23011/5926/163732/5611/54469/23036/282991/57862/6397/23099/54439/142891/80219/23198/55701/5500/665/11171/9218/5049/4149/64645/1105/51762/79753/23429/9589/6018/27342/2959/5718/94056
PCGF1	27	-0.175015	-0.330314	0.998693	1	1418	tags=30%, list=24%, signal=23%	6161/2014/65065/2597/6203/441150/79016/4682
E4F1	126	-0.168349	-0.343793	0.998942	1	397	tags=15%, list=7%, signal=14%	85369/51654/51593/81669/23042/5976/284352/124245/63906/9667/23759/3954/10270/84851/728294/23119/550631/2521/8767
HELLS	343	-0.266375	-0.547522	0.998996	1	769	tags=10%, list=13%, signal=9%	7341/9585/64795/56681/57708/9530/2803/1452/387082/23160/257415/9541/55206/51535/143384/5878/5926/64282/5611/10250/282991/10440/7334/830/165918/11103/9584/5500/5049/527/23204/801/9589/5718
SP2	321	-0.276103	-0.570452	0.998998	1	1054	tags=16%, list=18%, signal=14%	902/51188/473/55095/7040/11066/116842/54556/6500/8570/10291/84324/121665/29093/8214/5867/283991/219333/51465/9275/219988/58515/105369758/7417/100216545/81572/29115/8552/1452/6455/602/55122/5430/3087/6844/5611/100126791/384/2752/55330/165918/64859/51274/11103/7439/5879/11100/6303/527/23204/23387
ZNF587	341	-0.234505	-0.486787	0.999	1	667	tags=5%, list=11%, signal=5%	23774/8552/55096/101928865/2956/7551/1778/126298/79183/10658/26043/100507433/550631/2521/51710/527/10049
ZNF513	421	-0.259741	-0.535371	0.999	1	781	tags=9%, list=13%, signal=8%	58515/7341/9585/728294/7417/22992/56851/2077/9846/1452/257415/51714/10949/10597/5611/10250/10286/282991/476/10440/51228/7334/830/165918/10397/57701/55701/5500/9218/23261/11100/9709/3398/23204/801/23387/5718
RFX1	470	-0.249519	-0.513979	0.999001	1	734	tags=8%, list=12%, signal=7%	56681/7417/5927/84933/81572/9530/29115/56851/1452/6047/387082/9541/55206/143384/10597/5611/5862/8834/282991/57862/23099/10440/165918/8480/9587/5500/29982/11171/5049/23261/11100/6303/23204/9589/5718/94056
ZNF653	376	-0.221445	-0.455051	1	1	995	tags=12%, list=17%, signal=11%	388569/124491/63925/10959/54556/6500/7507/26528/81/10291/84324/5912/29093/54516/6993/58515/375/7341/7417/3939/9530/56851/1452/140735/7170/51714/5514/10597/5611/5862/8834/282991/10440/57701/5500/11171/5049/10140/23261/11100/6303/9709/57210/23204/801/23387
BRD4	418	-0.276639	-0.568019	1	1	1046	tags=16%, list=18%, signal=14%	51188/9883/473/10725/55095/11066/63925/5467/54556/6500/8570/10983/9818/84640/10291/4204/121665/140901/29093/8214/80176/219333/55279/1859/7109/5537/219988/23219/7403/105369758/84844/7417/100216545/81572/283624/29115/9807/6455/4780/602/171023/8301/7326/54915/5430/51552/23019/51696/8834/6670/80829/100126791/54764/384/81566/64746/10284/10892/57701/6309/23411/139231/7439/25820/11100/221079/23387
CHD3	438	-0.218178	-0.451797	1	1	1092	tags=12%, list=19%, signal=11%	9349/10920/81603/23299/51503/23062/51188/2512/388569/63925/54556/6500/26528/81/50628/10291/84324/79039/140901/29093/54516/735301/2081/58515/7341/728294/22928/7417/93487/3939/25874/22992/55269/56851/140735/171023/84957/10949/90390/10597/476/126917/10284/57701/56905/23261/11100/6303/8767/10209/57210/23204/23387
ZNF333	137	-0.155114	-0.315315	1	1	1445	tags=19%, list=25%, signal=15%	112637020/85369/619373/100009676/51654/30817/23042/4947/6094/56342/284352/100506436/388341/375035/79818/11021/10438/84851/79571/84844/23774/8552/1778/10949/550631/7439
KDM4A	187	-0.170572	-0.35394	1	1	850	tags=8%, list=14%, signal=7%	10438/84851/79571/728294/84844/23119/23774/8552/1778/10949/550631/384/2521/91355/7439
ZNF789	309	-0.20756	-0.426815	1	1	981	tags=12%, list=17%, signal=10%	11066/6774/116842/54556/6500/10983/10291/84324/5867/283991/84851/51335/105369758/81572/29115/8552/1452/25778/602/55122/387082/7551/55206/143384/79183/100126791/384/55330/165918/64859/100130476/7259/7439/11100/527/23204
BRD7	220	-0.197407	-0.411204	1	1	893	tags=7%, list=15%, signal=6%	79039/140901/84851/7109/55175/728294/29072/55269/2956/171023/1778/550631/2521/57210/6421
TCF20	313	-0.213057	-0.442088	1	1	889	tags=7%, list=15%, signal=7%	140901/735301/3566/2081/84851/7109/22992/90268/9807/23774/140735/171023/1778/10949/90390/476/81566/57701/23261/9567/9150/57210/23387
HMBOX1	272	-0.20957	-0.435246	1	1	139	tags=3%, list=2%, signal=3%	101928865/2956/1778/10658/23019/527/10049
ZNF512B	340	-0.190907	-0.394779	1	1	1325	tags=16%, list=23%, signal=14%	84444/342371/5976/8509/5202/56342/284352/23164/23102/124245/4670/84247/79803/6921/6709/10933/56257/23759/9349/23299/51188/9883/55095/2512/10657/11021/388569/8882/63925/124583/6500/26528/7975/50628/10291/84324/79039/140901/10838/58515/55175/728294/51755/7458/22992/55269/171023/10949/476/85364/57701/10140/23261/23204/801/23387
ZNF710	394	-0.240053	-0.493026	1	1	529	tags=5%, list=9%, signal=5%	10949/90390/10597/5611/282991/476/10440/7334/10284/57701/55701/5500/5049/23261/11100/6303/23204/23387/5718
ZNF620	404	-0.255299	-0.52217	1	1	610	tags=4%, list=10%, signal=4%	2956/26036/24144/51535/79183/163732/163051/10171/51276/1396/22835/51710/7561/7431/527/54855/91663
PCGF6	462	-0.208416	-0.426168	1	1	888	tags=12%, list=15%, signal=11%	3612/10059/55660/23169/26092/55279/8036/60488/51118/6049/7110/5537/23219/166968/9585/3313/51340/64376/51163/8533/79612/9528/10914/1964/23469/55854/10208/5701/9689/2956/257415/7326/51535/988/51444/55602/3839/9318/151987/6670/9804/3799/54439/830/64746/10923/56945/6309/23411/7319/10926/9908/2773/25843/5930
ZNF143	305	-0.206642	-0.422849	1	1	902	tags=9%, list=15%, signal=8%	4204/506/4848/253260/54790/55294/55773/7110/5927/9821/153222/226/10914/2803/4780/5520/4904/440026/79183/55031/5926/163732/286006/7846/665/26512/6498
JADE2	264	-0.18952	-0.391452	1	1	1046	tags=11%, list=18%, signal=9%	51188/55095/2512/388569/124583/6500/8570/253782/10291/84324/140901/29093/54516/7109/58515/7417/100216545/25874/22992/171023/23019/81566/10284/57701/11100/6303/23204/23387
BRD9	68	-0.183842	-0.36244	1	1	810	tags=15%, list=14%, signal=13%	6094/56342/100506436/9667/23759/84851/728294/23774/550631/2521
ZNF600	470	-0.211016	-0.434328	1	1	888	tags=12%, list=15%, signal=11%	3612/1060/10059/55660/4848/253260/262/114883/54790/55279/8036/51118/7695/23215/6049/7110/51340/64376/153222/226/23360/10914/1964/23469/2803/55854/25897/10208/5701/23160/257415/9685/51535/56605/988/55186/55031/1655/5926/9318/8087/23036/9774/64225/29080/3799/8774/51276/84146/9859/9584/105372481/1983/1195/51710/10926/9908/7561
PHF2	348	-0.162897	-0.334322	1	1	958	tags=8%, list=16%, signal=7%	6500/8570/26528/81/10291/84324/79039/29093/54516/735301/2081/7109/58515/7341/7417/100216545/25874/22992/10597/8834/476/81566/10284/55701/23261/11100/6303/23387
NR2C2	279	-0.23487	-0.488787	1	1	825	tags=8%, list=14%, signal=7%	9673/84851/23215/8874/7994/5927/29072/9807/23360/23774/91833/9698/1778/56605/54893/10658/26043/23198/123879/105372481/51132/25820/9043
ZNF507	433	-0.210906	-0.433249	1	1	1120	tags=15%, list=19%, signal=13%	6198/54861/10520/55870/54882/58517/6651/168374/148268/79577/26224/22894/66036/266812/22853/9818/84640/3189/5290/10059/23169/26092/114883/94241/4217/54790/84851/1859/6049/7110/166968/3313/55175/51340/64376/29072/79612/226/6875/55818/10914/23469/25897/10208/2956/3156/988/55602/3839/168850/6670/23036/9774/3799/1654/8204/9263/1983/23411/23670/10926/9908/51430/7561
BARD1	410	-0.263195	-0.540198	1	1	1094	tags=17%, list=19%, signal=15%	255919/51053/9349/10920/51503/9134/51188/10042/79577/23168/1977/80264/5717/51026/11066/124491/10959/54556/6500/7507/84324/30001/29093/1060/55660/4848/59348/8036/58515/7341/9585/64795/56681/5927/57708/9530/56851/2803/1452/9689/387082/23160/257415/9541/55206/51535/143384/10949/55031/10597/5926/64282/5611/10250/23036/9774/282991/10440/830/80219/84146/165918/11103/9584/5500/5049/527/23204/801/9589/57…
PHF5A	87	-0.200971	-0.406745	1	1	850	tags=9%, list=14%, signal=8%	10438/79571/105369758/10914/10949/550631/384/7439
KAT5	54	0.114136	0.320476	1	1	2261	tags=39%, list=38%, signal=24%	100874110/78996/55738/7918/114044/197342/161424/29911/390637/7694/84292/200205/5119/84167/84260/51149/400960/84872/56948/55298/222229
ZNF57	25	0.175657	0.440471	1	1	4854	tags=100%, list=83%, signal=18%	339500/54627/11244/54680/112840/7576/7769/126017/79871/153443/85476/9646/284406/199692/90321/84503/55781/162239/51527/83640/5082/126070/10520/148268/80264
THAP3	80	-0.17863	-0.357748	1	1	747	tags=8%, list=13%, signal=7%	105369758/84844/81572/550631/384/7439
ATF7IP	461	-0.258438	-0.53134	1	1	919	tags=19%, list=16%, signal=17%	2744/7305/5495/147694/157769/23394/10988/55671/284309/57711/9412/7871/5411/6198/54861/55870/54882/58517/6651/9861/168374/3344/26224/22894/571/53371/9818/84640/5290/7812/10059/55660/253260/26092/114883/94241/54790/55279/8036/1859/23215/6049/7110/147339/166968/51340/64376/29072/153222/79612/226/6875/55818/23360/10914/1964/23469/27107/55854/25897/122830/10208/2956/988/55186/3839/149041/168850/23019/…
ZNF618	96	-0.171672	-0.345616	1	1	1302	tags=16%, list=22%, signal=12%	284352/23164/6709/55534/23759/23299/9883/10657/8570/253782/26528/10291/79039/58515/11100
SMYD2	90	0.230283	0.724381	1	1	342	tags=6%, list=6%, signal=5%	9978/695/83879/4066/29965
NACC2	47	-0.181676	-0.347372	1	1	986	tags=28%, list=17%, signal=23%	968/3784/28232/4627/23092/7305/10437/7133/100653515/219855/55959/3074/64218
NFATC2	56	-0.136833	-0.268131	1	1	1037	tags=11%, list=18%, signal=9%	473/55095/2512/1859/171023/23019

## Sheet: TF R5 MTZ.C13vC5
ID	Regulon Size	enrichmentScore	NES	pvalue	p.adjust	rank	leading_edge	core_enrichment
TFDP2	379	-0.765955	-1.59406	1e-10	8.05e-08	590	tags=23%, list=11%, signal=22%	7942/10627/10094/2209/10287/63940/54502/51338/4542/3055/27180/8685/404093/10326/978/6945/3101/27036/3074/1200/9094/1396/5795/150372/440836/64231/3689/101927015/920/2124/6813/255809/53826/83862/83937/409/11024/285286/313/128346/968/11027/4210/23406/10577/6277/7940/7305/653361/126364/221472/1890/10312/7262/1471/25798/388325/824/4069/6282/6281/29992/58475/912/23643/3587/51296/308/79887/4688/11025/51…
ACTL6A	444	0.605599	1.80022	1.62404e-10	1.30735e-07	1290	tags=49%, list=23%, signal=41%	3925/9768/4925/79022/4173/79682/65008/51659/3070/11130/5111/1111/84319/91057/3146/9521/3329/54865/4176/4085/332/64105/22974/10024/79915/4172/983/79075/5427/4175/9133/51154/1017/10198/91298/63967/7153/28978/891/378708/10635/728591/1163/79723/9793/81624/4331/11113/6632/113802/80127/142/8208/7272/5888/10721/55215/83990/1854/55342/2237/160897/1033/8706/5471/84296/5984/29902/1063/116028/27346/10606/51…
KLF4	110	-0.875023	-1.7275	1.09302e-09	8.7988e-07	392	tags=46%, list=7%, signal=44%	150372/440836/64231/79180/3689/3597/255809/83937/11024/285286/313/128346/968/11027/23406/6277/7305/653361/25946/3162/221472/1890/7262/1471/6398/388325/824/4069/6281/55959/29992/114548/912/51816/308/4688/5199/4000/4035/219972/10288/1052/2268/9056/5660/115207/2207/9935/1520/10437/1462
PKM	269	-0.779103	-1.59758	1.50368e-09	1.21046e-06	757	tags=32%, list=14%, signal=29%	84034/10903/3705/5916/116985/138151/3683/27166/64127/23654/51324/140885/2014/1201/8742/254102/6688/8741/6604/63940/54502/4542/3055/2771/27180/2316/404093/10326/2760/7094/27036/3074/1200/124599/7408/476/150372/64174/79180/3689/920/3955/5547/6813/255809/53826/83937/11024/313/968/1522/11027/665/8522/64005/6948/23406/6277/7940/7305/653361/221472/1890/79026/3684/10312/1471/6404/6398/824/2799/6281/4245…
BCL6	81	-0.900258	-1.74394	3.02317e-09	2.43365e-06	394	tags=64%, list=7%, signal=61%	5795/150372/440836/79180/84957/3689/5339/3955/255809/1263/10018/54210/409/929/5604/1378/4210/9922/23406/7805/653361/7321/25946/22918/3162/10312/25798/8676/6398/6452/3460/58191/9473/124935/51363/114548/3587/51296/101/79887/4688/4035/7127/6556/7133/2268/9056/115207/9935/6280/728/1462
FOXM1	123	0.805173	2.04456	1.00916e-08	8.12374e-06	550	tags=48%, list=10%, signal=44%	3925/9768/7298/1869/51514/4171/4173/4605/81620/11130/5111/1111/4288/195828/64946/9088/4176/4678/332/22974/10024/4998/6941/7374/3182/5902/4172/79075/5427/4175/9133/1017/283489/1663/4174/10376/92745/2189/11113/8318/6723/8208/23170/7272/993/5888/4001/83990/4796/113130/8704/11004/9942/25886/116028/3418/10541/990/11065
NACC2	144	-0.838024	-1.67437	1.10142e-08	8.86641e-06	394	tags=40%, list=7%, signal=38%	5795/150372/440836/3689/3597/5339/3955/255809/4853/409/929/11024/313/968/1522/4210/8522/64005/6948/23406/7305/653361/25946/22918/221472/1890/10312/1471/6404/6398/6452/388325/824/2799/6281/4245/124935/55959/29992/26112/912/3587/51296/308/4688/5199/4035/219972/10288/7127/6556/7133/2268/9056/5660/115207/10437
DNMT1	209	0.705287	1.98126	1.2909e-08	1.03917e-05	977	tags=56%, list=17%, signal=48%	7298/1869/51514/4171/4173/4605/11130/5111/1111/4288/195828/9088/54865/4176/4678/79801/332/22974/10024/4998/6941/7374/3182/4172/8607/79075/5427/4175/51154/1017/83743/10198/63967/1663/7153/4174/10785/79723/9793/81624/2189/11113/8318/142/8208/23170/7272/993/5888/10721/55215/4001/83990/4796/113130/2237/2305/11004/84296/5984/147841/1063/9942/25886/116028/10606/118980/990/1736/8479/9735/54517/4691/5405…
CHAF1B	92	0.843772	2.11929	1.60029e-08	1.28824e-05	687	tags=70%, list=12%, signal=62%	3925/9768/7298/51514/4171/4173/4605/79682/7083/51659/3070/11130/5111/1111/64946/9088/4176/4678/4085/332/22974/10024/4998/79915/4172/79075/5427/4175/9133/1017/63967/7153/4174/378708/10635/1163/79723/81624/2189/11113/8318/7272/993/5888/10721/113130/2237/2305/387103/5471/11004/5984/147841/51053/990/11065/9232/11169/54069/9212/23594/23468/23234/65062
ZNF385A	171	-0.819648	-1.64618	2.01064e-08	1.61857e-05	556	tags=38%, list=10%, signal=35%	63940/54502/29800/2771/27180/8685/404093/58480/126308/55122/6715/7408/5795/150372/440836/79180/3597/5339/2124/255809/409/929/5604/11024/148022/968/5566/23406/7805/6277/7940/7305/653361/7321/22918/3162/604/1890/10312/7262/1471/25798/6398/6452/824/3460/2907/6281/4245/124935/55959/912/3587/51296/308/942/4035/219972/7133/2268/9056/115207/2207/9935/10437
RXRA	201	-0.795654	-1.61722	4.14378e-08	3.33574e-05	739	tags=40%, list=13%, signal=36%	3705/116985/138151/2101/3683/79168/91662/55803/3748/140885/8742/340527/254102/1230/8741/65220/7942/10287/4542/3055/27180/2316/404093/58480/10326/2760/7094/3101/27036/9094/23092/124599/8536/3753/5724/5795/150372/3689/920/3955/6813/5447/83937/11024/6546/285286/313/3482/221895/1522/89790/11027/4210/9764/7099/6277/653361/953/126364/221472/1890/3684/10312/6404/388325/2799/29992/912/10875/1508/3687/468…
ASF1B	104	0.804696	2.01785	5.05431e-08	4.06872e-05	635	tags=57%, list=11%, signal=51%	9768/7298/79022/4171/79019/4173/4605/7083/51659/11130/6182/5111/4288/79001/64946/9088/11332/4085/332/22974/10024/154467/6941/4172/983/9133/51154/1017/63967/7153/4174/891/10376/55695/1163/79622/2189/11113/8318/6119/8208/5888/1854/113130/2237/2305/1033/11004/147841/9942/25886/116028/990/8479/11065/65993/9232/9212/26292
ZBTB7B	341	-0.743078	-1.5428	8.51561e-08	6.85507e-05	942	tags=41%, list=17%, signal=36%	57192/118788/57514/4335/11006/2889/6448/3784/7454/23196/4627/92799/9123/1729/9961/64072/144423/3566/79716/64218/1774/25939/4650/26020/91373/257106/5170/2870/84689/84034/2137/6256/3705/5338/116985/138151/79888/3683/79168/6778/64127/115727/91662/23654/3748/647135/140885/340527/254102/6688/65220/7942/6604/2209/100113407/63940/54502/4542/3055/2771/27180/2316/404093/58480/10326/2760/7094/3101/126308/9…
DBF4B	300	0.611086	1.76643	1.16195e-07	9.35368e-05	965	tags=40%, list=17%, signal=35%	7298/9315/5336/6666/4171/4173/4602/5111/56953/8501/6300/2193/54865/4176/4678/10024/6941/7374/3182/5902/4172/8607/133308/135293/7915/79075/5427/4175/51154/1017/4507/83743/1663/51768/4174/10785/349565/2189/8318/142/23170/993/5888/4001/2288/4796/2305/8655/8831/29902/489/9942/25886/116028/3418/10606/118980/8479/471/54517/7108/54058/79711/113655/9415/399687/1019/7468/26284/83596/10514/54903/3181/64794…
ORC1	93	0.821738	2.00725	1.32271e-07	0.000106478	498	tags=56%, list=9%, signal=52%	9768/7298/1869/51514/4171/4173/4605/79682/81620/11130/5111/1111/4288/195828/9088/4176/4678/79801/4085/332/22974/10024/79915/983/79075/55159/5427/4175/9133/1017/63967/7153/4174/891/10635/9793/92745/81624/2189/11113/8318/8208/7272/993/5888/10721/55215/83990/113130/2305/11004/1063
CEBPB	53	-0.91331	-1.71647	1.43398e-07	0.000115436	405	tags=72%, list=7%, signal=67%	9114/5724/637/2512/100505994/255809/54210/55647/200315/1438/10261/126364/2357/7378/58191/5329/9473/6282/29992/1508/51296/11025/9516/10288/2212/64581/50856/6556/7133/4814/342510/50486/2207/3958/9935/353514/10437/2219
SUV39H2	229	0.663672	1.86426	2.21362e-07	0.000178197	992	tags=54%, list=18%, signal=46%	3925/3945/51514/4173/79682/65008/5111/1111/84319/91057/5588/3146/3329/54865/4869/4176/4678/4085/64105/22974/79915/4172/55225/135293/79075/5427/4175/1017/10198/63967/7153/10635/728591/9793/81624/4331/11113/6632/142/7272/993/5888/10721/55215/83990/55342/160897/10576/8706/5471/5984/1063/166647/10606/51018/118980/85444/990/1736/9735/54517/137682/151246/113174/4691/28981/11169/54069/23421/79598/283742…
MYCL	80	-0.8694	-1.68861	2.5443e-07	0.000204816	553	tags=59%, list=10%, signal=54%	3394/54502/51338/27180/404093/58480/2760/27036/3074/10859/64231/3689/920/3597/929/11024/968/4210/23406/25946/126364/221472/1890/6404/388325/824/2799/55959/29992/912/10875/51816/308/4688/11025/942/4035/219972/10288/1512/2268/9056/5660/115207/1520/10437/1462
ZNF581	171	0.694814	1.90524	1.20356e-06	0.00096887	535	tags=35%, list=10%, signal=32%	10870/114900/100506844/23521/6181/283869/6175/4282/6168/6235/6224/6137/3921/3159/25873/6169/6202/125144/6167/4833/6160/947/6205/6176/6142/7311/140465/84650/79801/6228/199990/6193/6227/6161/8420/4831/6155/6158/63967/4736/328/29937/6130/9793/57819/80097/51162/708/10721/7486/55215/6143/517/200916/5927/6141/653784/6165/6207
ERCC6L	156	0.712583	1.89002	1.79876e-06	0.001448	1068	tags=54%, list=19%, signal=45%	51514/4173/4605/79682/11130/5111/1111/4288/195828/3146/79801/4085/22974/4998/79915/983/79075/55159/5427/4175/9133/10198/91298/63967/7153/891/10635/79723/9793/81624/11113/8208/7272/993/10721/7486/55215/83990/113130/5471/11004/5984/1063/7733/51018/85444/990/9735/151246/113174/11169/79598/23594/23234/55329/65062/54443/25926/284403/9134/11168/57650/64151/8727/9928/342892/55355/3161/27340/129642/5558/…
KDM4C	192	0.658672	1.83705	2.65611e-06	0.00213817	535	tags=21%, list=10%, signal=20%	23521/6175/4282/11224/6168/6235/6137/6223/6136/25873/6169/6748/6202/6167/6160/6205/6176/6206/6230/6228/6193/6222/6227/6161/6155/6635/6158/10198/6208/3094/80097/6209/517/6201/6187/6894/6141/653784/6165/6207
MAFB	43	-0.910572	-1.70238	2.78192e-06	0.00223944	310	tags=67%, list=6%, signal=64%	255809/54210/929/54453/22918/3162/126364/7378/1051/8676/6398/58191/9473/3587/51296/11025/4035/10288/64581/6556/7133/4814/342510/9056/5660/50486/3958/728/10437
ASH2L	300	0.583157	1.69194	4.00993e-06	0.003228	1307	tags=56%, list=23%, signal=45%	4171/4173/11130/5111/84319/8501/91057/2193/54865/4176/4678/4085/22974/6941/7374/3182/4172/8607/133308/7915/79075/5427/4175/51154/1017/4507/1663/4174/891/10785/79723/9793/349565/2189/11113/8318/142/23170/5888/55215/4796/160897/11004/84296/5984/29902/25886/116028/10606/118980/85444/990/8479/471/54517/7866/4691/54058/11169/113655/9415/23421/26292/7468/26284/5693/594/10514/23468/84140/55759/54903/318…
CHAF1A	133	0.714186	1.85357	6.20335e-06	0.00499369	835	tags=48%, list=15%, signal=42%	7298/1869/4145/51514/4171/4173/4605/81620/1111/9088/4176/4678/494514/4998/6941/7374/3182/4172/8607/4175/1017/83743/63967/1663/4174/10785/92745/2189/11113/8318/142/8208/23170/993/5888/10721/4001/4796/113130/2305/11004/25886/3418/9735/79711/9415/399687/7468/83596/10514/23594/10471/3181/284403/1786/55764/8568/6621/57521/1719/401251/9401/8924/201255
SMYD5	252	0.59223	1.63472	9.86728e-06	0.00794316	980	tags=48%, list=18%, signal=41%	400668/7298/2593/9315/129080/66005/4145/6666/3326/4171/4173/4833/3615/28969/56953/23209/8501/5425/6300/4176/4678/7374/3182/5902/8607/133308/81691/51477/7915/2091/284184/51154/83743/51768/328/10785/56265/10376/1953/64798/2189/6723/142/23170/3561/708/2288/4796/8704/388567/57418/8831/5575/489/3418/166647/10606/118980/26086/471/3608/54517/23598/50512/7108/7866/4691/79711/113655/9415/5360/399687/1019/…
IRF8	96	-0.824512	-1.61769	1.5046e-05	0.012112	676	tags=51%, list=12%, signal=46%	55803/3748/140885/8742/433/1230/8741/7942/54502/51338/3055/27180/2760/27036/3074/9094/124599/10859/64231/3689/920/51225/3597/83937/11024/834/6546/285286/313/968/1438/217/22918/126364/221472/388325/824/4069/58475/912/10875/1508/308/4688/64115/942/219972/2268/5660
MYBL2	61	0.826902	1.86239	1.59471e-05	0.0128374	481	tags=52%, list=9%, signal=48%	7298/1869/51514/4171/4173/81620/11130/5111/1111/4288/195828/64946/9088/79801/22974/10024/4998/983/9133/1017/283489/4174/10376/92745/11113/8318/8208/7272/993/113130/2305/11004
PRMT5	377	0.517721	1.52995	2.16917e-05	0.0174618	1008	tags=43%, list=18%, signal=38%	3925/66005/79022/4830/4171/79019/4173/55536/65008/51659/204/11130/3615/6182/79077/84319/2653/8501/5052/91057/5425/2193/23464/3329/5831/54865/26517/4176/4678/64105/10436/6941/7374/3182/5902/4172/8607/84300/7915/51154/286467/4507/83743/1663/51768/28978/4174/10785/84284/1163/79723/349565/10954/2189/6632/8318/142/23170/5888/51258/28958/2288/516/1854/4796/57418/8655/84937/84296/29902/5575/9942/25886/1…
TFEB	175	-0.765905	-1.55665	2.20371e-05	0.0177399	923	tags=44%, list=17%, signal=38%	11006/2793/3784/92799/9961/51043/64072/5452/53917/64218/1774/25939/257106/84689/6256/3705/116985/10553/3683/79168/55803/3748/140885/8742/340527/8741/2209/10287/3394/4542/3055/404093/10326/2760/6945/3101/27036/3074/9094/23092/124599/10859/8495/717/64231/3689/920/51225/6813/5447/83937/11024/313/128346/968/3482/11027/6277/126364/221472/1890/3684/23158/6404/388325/2799/29992/912/3687/4688/11025/64115…
RBBP4	397	0.512775	1.5065	2.56195e-05	0.0206237	1014	tags=29%, list=18%, signal=26%	3925/9768/3945/79682/65008/51659/3070/11130/84319/91057/3146/9521/4869/4085/332/64105/22974/79915/4172/6428/5427/4175/10198/63967/7153/28978/891/378708/10635/1163/79723/81624/4331/6632/113802/55215/55342/2237/160897/1033/387103/5471/5984/1063/27346/10606/51018/80321/85444/55916/51053/990/1736/54517/7979/151246/113174/28981/468/11169/54069/23421/64395/58477/594/79649/23594/23468/23234/84140/65062/…
RAD54L	218	0.621138	1.70067	2.67654e-05	0.0215461	1059	tags=57%, list=19%, signal=48%	79022/4171/79019/4173/7083/51659/11130/4288/91057/2193/9088/54865/4176/4678/332/10436/22974/10024/494514/4998/6941/7374/3182/4172/8607/25911/4175/29893/51154/1017/63967/1663/7153/4174/891/10785/1163/79723/349565/81624/2189/11113/8318/5888/10721/51258/55215/28958/4001/4796/113130/2237/1033/122509/11004/84296/5984/147841/1063/25886/116028/118980/990/8479/9735/7866/54058/11169/54069/23421/9212/7468/…
MTF1	131	-0.784317	-1.57793	4.00859e-05	0.0322691	417	tags=23%, list=7%, signal=22%	10043/5724/4193/10970/6303/100505994/221692/5209/9770/3459/200315/597/2180/11031/54964/2357/7378/114769/2204/5329/9473/10135/6648/9516/4814/6283/255488/50486/6279/353514
MLX	307	-0.709221	-1.46493	4.6533e-05	0.0374591	822	tags=21%, list=15%, signal=19%	8774/64218/1774/25939/27163/84689/84034/10903/3705/10553/51673/6778/27166/23654/963/23528/1201/8742/6688/8741/7942/5966/10094/2209/10287/63940/4542/3055/2771/27180/84458/27036/1436/1396/64231/3597/6813/5447/83937/11024/128346/968/22936/11027/665/23406/7940/7305/64744/221472/1890/10312/1471/6404/388325/6281/29992/912/7150/131870/5199/219972/2268/2207
MBD2	59	-0.854781	-1.5977	7.93455e-05	0.0638731	472	tags=54%, list=8%, signal=50%	3074/54926/5795/55013/79180/3597/79627/2124/409/929/5604/5906/5566/23406/7805/25946/25798/6452/824/4067/9445/3460/4245/124935/26112/51363/3587/942/219972/7133/9056/115207
E2F8	73	0.781546	1.92123	0.000131604	0.105941	925	tags=68%, list=17%, signal=58%	51514/4605/11130/5111/1111/4288/195828/79801/22974/10024/4998/79915/983/5427/4175/9133/1017/63967/7153/10635/9793/81624/11113/7272/993/10721/55215/83990/113130/2305/11004/1063/990/151246/11169/9212/79598/23594/54443/284403/9134/57650/64151/55071/9928/342892/55355/3161/129642/699
PADI4	43	-0.870813	-1.5924	0.000177222	0.142664	507	tags=51%, list=9%, signal=47%	978/3101/100505746/120892/10970/101927015/240/200315/4210/9764/53829/2357/2204/79887/1536/8875/50856/6283/6279/353514/6280/2219
PARP1	235	0.564021	1.5842	0.000190538	0.153383	1049	tags=47%, list=19%, signal=40%	3925/3326/4171/4173/55536/84319/23209/5425/54865/4176/4678/6941/7374/3182/4172/8607/133308/135293/7915/4175/51154/4507/83743/10198/1663/51768/4174/10785/79723/10954/2189/113802/8318/23170/55342/57418/84296/29902/5575/166647/10606/118980/1736/471/54517/7866/4691/79711/7468/26284/594/10514/23468/84140/1021/54903/3181/65062/10969/64794/84939/51021/1786/2618/8568/23301/128/10061/26135/1719/55750/1521…
HMGN2	141	0.646533	1.68965	0.000209649	0.168767	625	tags=32%, list=11%, signal=29%	3925/9768/4925/79022/79019/79682/7083/51659/3070/11130/5111/91057/64946/3146/9521/4085/332/64105/5757/9133/63967/7153/28978/378708/10635/1163/81624/6632/6119/1854/1033/387103/5984/85444/55916/51053/990/6185/11065/8836/151246/9232/54951/54069/23421
HLX	25	-0.907176	-1.63884	0.000245157	0.197351	367	tags=60%, list=7%, signal=56%	79180/2124/23406/604/8676/6452/58191/602/124935/55959/114548/3587/101/7133/1052
POU2F2	75	-0.814986	-1.55401	0.00025347	0.204043	590	tags=47%, list=11%, signal=42%	7942/8905/3394/54502/9936/4542/27180/404093/27036/1200/6715/10859/64231/51225/3597/2124/83937/11024/128346/968/11027/5566/23406/221472/1471/6404/388325/824/2799/58475/912/51816/308/219972/115207
ZNF367	80	0.736835	1.80164	0.000265196	0.213483	971	tags=52%, list=17%, signal=44%	51514/4605/6136/79682/5111/1111/4288/3146/79801/4998/79915/983/55159/5427/283489/63967/7153/10635/11113/7272/6209/993/10721/83990/6187/2305/7733/990/9735/6188/79598/23594/54443/284403/10399/64151/9928/342892/55355/54465/139886/10733
AKAP1	320	0.496473	1.46574	0.000306199	0.24649	1299	tags=45%, list=23%, signal=37%	5336/4171/4173/4602/204/6182/8501/5425/6300/54865/4678/6941/7374/3182/5902/4172/8607/7915/51154/4507/83743/1663/51768/10785/349565/2189/142/23170/5888/2288/4796/8704/57418/8655/64098/29902/9942/25886/10606/118980/8479/471/54517/65993/7866/4691/79711/113655/1019/26292/64110/594/10514/84140/55759/54903/3181/10969/64794/1468/80233/84939/1786/2618/8568/6621/90956/6487/23301/10061/26135/1719/55750/152…
ZNF519	338	0.502579	1.46531	0.000395723	0.318557	1253	tags=38%, list=22%, signal=32%	3925/5567/79682/65008/3070/1111/91057/3146/64105/79915/6428/79075/5427/4175/10198/10635/79723/9793/4331/7272/10721/55215/83990/55342/160897/10576/7738/8706/5471/5984/10606/7733/51018/80321/85444/9735/57181/137682/151246/113174/28981/11169/22869/54069/81856/23421/64395/79598/79649/23594/23468/84140/55329/65062/5557/51602/3998/25926/134637/10455/23301/26354/285349/26135/25888/152185/55120/11168/339…
E2F7	54	0.788664	1.78944	0.00041546	0.334445	927	tags=72%, list=17%, signal=61%	51514/4605/79682/11130/5111/1111/4288/195828/79801/22974/4998/983/9133/63967/7153/10635/81624/11113/7272/993/10721/83990/113130/2305/11004/1063/990/11169/79598/23594/54443/284403/64151/9928/342892/55355/3161/699/3151
ZNF85	161	0.611381	1.66359	0.000416035	0.334908	1017	tags=30%, list=18%, signal=25%	3925/5567/3178/65008/64116/3146/4673/9331/135293/79075/5427/9767/10198/83990/55342/160897/10576/7738/90488/10606/51018/113174/11169/22869/79649/3998/25926/23301/285349/7514/11168/339324/163087/57489/1479/5955/55726/1964/54465/5558/142940/1653/7705/10733/10314/81931/56898/90338
PA2G4	369	0.481038	1.43647	0.000500109	0.402588	655	tags=31%, list=12%, signal=30%	3925/9768/7298/402/66005/79022/4282/4830/4171/79019/4173/65008/7083/51659/11130/3615/6182/79077/140465/5111/84319/2653/8501/79001/5052/91057/64946/5425/2193/23464/84326/5037/9521/11332/5831/54865/26517/4176/4678/4085/332/64105/10024/154467/6941/7374/3182/5902/4172/8607/84300/284184/51154/78988/83743/51690/8673/28978/328/4174/10785/378708/84284/10376/1163/23658/10954/79622/2189/6632/8318/6723/142/…
ZNF107	481	-0.648203	-1.35045	0.0005206	0.419083	379	tags=5%, list=7%, signal=6%	64231/64174/3689/255809/285286/313/968/1522/7086/23406/6277/7940/7305/221472/1471/6404/388325/6281/55959/29992/5199/2268/9056/2207/10437/3957
CENPA	46	0.811383	1.86156	0.000841297	0.677244	925	tags=78%, list=17%, signal=66%	7298/4605/11130/5111/4288/195828/64946/4085/332/22974/10024/4998/983/9133/1017/7153/891/10376/11113/7272/2305/11004/25886/116028/990/11065/9212/54443/284403/29901/9401/55071/55355/3161/53340/699
IRF5	281	-0.674756	-1.39412	0.000876075	0.705241	1039	tags=26%, list=19%, signal=22%	3965/2548/1445/151056/23096/6275/4668/50640/5330/8887/26469/10008/57514/11006/3784/7454/23196/92799/5452/51526/64218/1774/25939/154881/27163/94056/3705/3683/6778/27166/115727/23654/8742/6688/8741/10287/63940/4542/3055/2771/2760/6945/84458/1436/1200/5500/64174/3689/3597/6813/8514/83937/11024/313/128346/968/55701/1522/11027/665/64005/23406/7305/221472/1890/10312/1471/6404/388325/912/51816/219972/22…
SND1	313	0.487532	1.39922	0.00113489	0.913587	982	tags=30%, list=18%, signal=26%	400668/66005/4145/79948/3326/4171/4173/3615/8501/6300/5478/7374/3182/2023/10360/8607/133308/7915/2091/51154/4507/51768/811/328/10785/1953/64798/2189/6723/142/23170/708/4001/2288/4796/8704/8831/5575/489/10493/3418/10606/471/4691/79711/113655/9415/54836/399687/1019/26284/10514/126299/10471/80233/84939/79724/55764/8568/90956/6487/10061/57521/5860/29920/9401/10901/8924/201255/63910/3033/28992/4723/58…
RARG	41	-0.846113	-1.55861	0.00115305	0.928201	472	tags=51%, list=8%, signal=47%	3074/124599/79180/5339/3955/968/5141/64005/7805/25946/6452/824/124935/26112/3587/101/2859/4000/219972/7127/7133
ZBTB8A	169	-0.714878	-1.45026	0.00179845	1	568	tags=16%, list=10%, signal=15%	10287/4542/3055/10326/27036/9094/64231/3689/920/255809/83937/11024/285286/313/128346/6277/7940/7305/126364/221472/6404/29992/4688/11025/10288/2268/2207
PARP3	263	0.488162	1.39878	0.00208588	1	434	tags=10%, list=8%, signal=10%	116729/344/9315/3205/66005/204/29952/6182/79001/6300/3206/10669/3182/8607/254552/284184/684/399726/8673/1031/55695/349565/6723/23170/122618/11007/4796
CBX1	265	0.500786	1.4	0.00239013	1	1238	tags=43%, list=22%, signal=35%	66005/79022/204/79077/84319/5052/5425/2193/54865/4678/6941/7374/3182/4172/8607/51154/4507/1663/28978/10785/84284/349565/79622/142/5888/51258/28958/4796/57418/64098/84296/29902/25886/8479/79621/471/65993/113655/23421/26292/58477/64110/594/10514/84140/55759/54903/3181/10969/80233/84939/51021/2618/8568/10061/1719/55750/5860/29901/29920/10325/10901/201255/672/55110/326625/151313/23640/7157/26751/5449…
ZNF467	29	-0.864508	-1.55854	0.00249918	1	556	tags=55%, list=10%, signal=50%	63940/2771/84106/6715/10634/150372/240/409/5566/23406/25798/6398/55959/1052/9056/6280
ZNF473	174	0.557112	1.53686	0.00291518	1	1487	tags=55%, list=27%, signal=42%	4602/4678/7915/4175/83743/10198/79723/9793/55215/83990/55342/5311/6894/160897/10576/166647/7733/85444/54517/151246/7108/113174/4691/22869/79598/1021/65062/64794/6621/57539/23301/26354/7514/152185/672/115950/8502/55622/27340/84182/26751/5558/699/253769/64434/51474/1653/7705/84083/11128/57496/9875/25929/7753/60526/84899/51626/64921/5378/91147/57147/8518/84172/51134/64770/55755/162655/57534/4436/107…
ZNF74	106	0.648416	1.68608	0.00310808	1	1307	tags=61%, list=23%, signal=48%	6666/55536/2193/7374/3182/8607/7915/51154/4507/51768/142/23170/2288/4796/29902/166647/471/54517/7108/113655/399687/10514/54903/64794/80233/84939/8568/6621/23301/10061/201255/7157/54496/29985/253769/26995/5832/9277/53615/2068/11128/9875/10528/25929/90861/124454/7753/5188/60526/54919/79149/5378/55011/64949/2639/64210/705/91433/622/121642/7023/84064/83986/661/79828
KMT2A	436	-0.62633	-1.30738	0.0033313	1	321	tags=5%, list=6%, signal=5%	5538/255809/285286/313/128346/968/10577/6277/7940/7305/126364/1471/4069/6282/6281/29992/1508/308/5199/2268/5660/2207/10437
L3MBTL2	317	0.459473	1.36197	0.00406979	1	1280	tags=42%, list=23%, signal=35%	66005/5336/4171/4173/204/79077/6300/2193/54865/4176/4678/6941/7374/3182/4172/8607/7915/4175/51154/1017/4507/83743/1663/4174/10785/55695/349565/2189/8318/142/23170/5888/28958/4796/57418/8655/64098/29902/25886/116028/8479/471/65993/7108/113655/1019/26292/7468/26284/83596/64110/10514/54903/3181/64794/1468/80233/84939/79724/1786/2618/8568/6621/90956/10061/55750/5860/29901/29920/9401/10901/8924/201255…
YEATS4	79	0.693852	1.74059	0.00418385	1	430	tags=29%, list=8%, signal=27%	3925/9768/51514/79682/1111/64946/3146/9521/4085/79915/983/79075/5427/4175/9133/6636/10635/23658/81624/8208/7272/83990/1854
CAMTA2	456	-0.632948	-1.32228	0.00512451	1	1073	tags=28%, list=19%, signal=25%	113/5580/246330/84905/51185/3663/2548/1445/151056/23096/4668/55852/5330/26469/55911/9610/9612/10008/9854/57192/118788/57514/4335/11006/3784/7454/23196/4627/92799/9961/51043/64072/5452/11188/79716/64218/1774/25939/27163/26020/94056/91373/257106/2870/84689/2137/6256/3705/116985/138151/79888/3683/6778/115727/23654/7320/3748/140885/27239/8742/340527/254102/6688/8741/65220/7942/63940/4542/3055/2771/23…
HMGB2	20	0.852191	1.70023	0.00608425	1	498	tags=70%, list=9%, signal=64%	9768/79682/79801/4085/22974/983/9133/7153/891/10635/81624/7272/11004/1063
TSPYL4	134	-0.714751	-1.42666	0.00657492	1	568	tags=14%, list=10%, signal=13%	10287/4542/27180/169200/64231/255809/968/7086/11027/23406/6277/7305/1890/6282/29992/4688/5199/2268/2207
VDR	19	-0.883068	-1.49717	0.0107996	1	417	tags=63%, list=7%, signal=59%	10043/284129/10018/30844/7056/22918/7378/58191/124935/51296/7133/4814
TGIF2	73	-0.753762	-1.4663	0.0112294	1	270	tags=8%, list=5%, signal=8%	128346/6277/7940/7305/29992/2207
DLX4	26	0.831288	1.74479	0.0113293	1	107	tags=12%, list=2%, signal=11%	116729/344/29952
PHF14	347	0.434855	1.30903	0.0131499	1	1451	tags=48%, list=26%, signal=38%	3326/5567/4602/3178/65008/28969/84319/91057/5588/3146/3329/54865/4678/9331/135293/7915/79075/5427/4175/9767/4507/10198/3320/79723/83990/55342/220988/5311/6894/160897/10576/8706/5471/29902/166647/10606/23642/51018/80321/85444/79621/9735/57181/54517/151246/113174/28981/11169/22869/23421/64395/79598/594/79649/84140/1021/55329/54903/3181/64794/3998/134637/84939/2618/23301/26354/285349/26135/25888/751…
TFAP4	302	0.430691	1.26503	0.0134485	1	965	tags=25%, list=17%, signal=22%	7298/9315/5336/6666/2171/4171/4602/8501/4678/6941/7374/3182/5902/4172/133308/254552/135293/7915/51154/4507/51768/6723/23170/708/2288/11007/4796/8704/8655/8831/29902/9942/116028/3418/10606/471/54517/65993/8574/113655/9538/399687/1019/10514/143888/54903/64794/1468/80233/5191/8568/6621/90956/6487/10061/57521/1719/29901/29920/9401/10901/201255/3033/5827/90378/51073/7157/5558/54496/253769/10155/5832/5…
RSAD1	381	0.415471	1.21107	0.0142555	1	982	tags=28%, list=18%, signal=25%	9315/5336/6666/4171/4173/4602/10220/204/23209/8501/6300/54865/4678/6941/7374/3182/5902/4172/8607/133308/7915/51154/4507/83743/1663/51768/10785/2189/6723/142/23170/2288/4796/8704/6894/57418/8655/8831/64098/29902/489/25886/10606/118980/471/54517/65993/7108/51148/8574/7866/79711/113655/9415/399687/1019/83596/594/10514/54903/3181/64794/1468/80233/84939/79724/8568/6621/90956/6487/23301/10061/57521/171…
MZF1	265	0.446292	1.25069	0.0144263	1	1307	tags=35%, list=23%, signal=29%	9315/5336/6666/4171/4602/56953/6300/7374/3182/8607/133308/7915/4507/1663/51768/10785/2189/23170/4796/6894/8655/8831/64098/29902/471/7108/54058/113655/9415/399687/10514/101929147/54903/64794/80233/84939/79724/8568/6621/6487/10061/57521/152185/401251/29901/29920/9401/10901/201255/63910/3033/115950/90378/7157/54496/29985/253769/10155/9277/53615/7343/2068/3978/140680/9875/90861/124454/7753/5188/60526…
ZNF697	20	-0.860226	-1.47597	0.0150212	1	509	tags=60%, list=9%, signal=55%	128866/526/2355/5339/1263/9846/6385/2683/56882/3587/23710/9595
NR1I2	112	0.5911	1.53475	0.0157002	1	1182	tags=50%, list=21%, signal=40%	66005/79948/253827/204/6182/8501/79001/6300/6941/7374/847/3182/8607/4507/51768/10785/349565/23170/4796/64098/25886/471/65993/113655/1019/10514/54903/1468/80233/8568/6487/10061/5860/29901/29920/10901/201255/326625/54496/253769/26995/53615/2068/79763/9875/124454/5188/60526/7263/9894/54919/79149/55011/5437/64949/3703
ZNF296	75	-0.733144	-1.44172	0.0165758	1	701	tags=27%, list=13%, signal=24%	27166/3748/6688/7942/10287/63940/9094/1396/920/968/11027/23406/6277/7940/7305/653361/126364/1471/1512/2207
CEBPD	22	-0.852362	-1.48711	0.0170622	1	332	tags=36%, list=6%, signal=34%	2124/409/23406/6281/55959/23643/9056/115207
ASCL2	116	0.58096	1.45606	0.017589	1	479	tags=11%, list=9%, signal=10%	116729/344/6036/204/29952/79001/8673/55695/349565/11007/4796/8655/64098
PRDM15	201	0.4708	1.32946	0.0192209	1	1510	tags=44%, list=27%, signal=33%	6666/4602/9781/158405/135293/7915/9767/4507/10198/1953/142/57546/5311/6894/197358/489/166647/9196/23598/22869/399687/7468/10514/1021/64794/55764/8568/6621/23301/26354/57521/152185/27130/401251/8924/79969/27340/26751/54496/253769/64434/23178/53615/7343/26094/145508/11128/57496/9875/25929/124454/7753/84914/84899/64921/51434/57147/8518/84172/64210/6929/705/55755/6293/57534/23279/79828/4076/26013/231…
PSIP1	356	0.433107	1.21107	0.021097	1	1325	tags=33%, list=24%, signal=27%	3925/5567/79682/65008/3070/1111/3146/79915/6428/262/54941/79075/5427/10198/91298/3320/10635/79723/9793/7272/55342/160897/10576/7738/5471/10606/7733/51018/80321/85444/1736/57181/137682/151246/113174/28981/11169/64395/79598/79649/23594/23234/55329/65062/51602/3998/25926/134637/10455/23301/26135/339324/7443/55843/11198/163087/57489/27340/80173/55726/1964/26751/11052/54465/142940/6418/1653/7570/7705/…
RBBP7	232	0.474765	1.31115	0.0219865	1	1513	tags=49%, list=27%, signal=37%	5567/4173/79682/3178/65008/28969/1111/3146/79075/55159/4175/9767/10198/79723/9793/142/83990/55342/220988/10576/5471/10606/51018/1736/3608/113174/4691/79598/79649/23594/23234/143888/1021/55329/65062/3998/25926/134637/55127/26354/128/26135/7514/11168/6558/11198/6875/55622/27340/1964/11052/54465/5558/142940/6418/1653/7570/10733/55728/84083/10314/10146/7675/50808/28977/498/84899/2967/7247/64921/51434…
SOHLH2	26	0.744565	1.64125	0.0247601	1	1299	tags=88%, list=23%, signal=68%	84319/23464/728591/118980/54517/23421/58477/594/84140/10969/2618/23301/55622/80173/5832/84083/401207/60526/91147/9557/51134/84064/254042
HMGB1	375	0.405165	1.16244	0.0306	1	992	tags=19%, list=18%, signal=17%	3925/5567/79682/3178/65008/3070/1111/195828/4085/64105/79915/983/10360/6428/262/5427/10198/3320/7153/10635/7272/83990/55342/160897/10576/7738/5471/7733/51018/85444/55916/9735/57181/7979/151246/113174/11169/64395/79598/79649/23594/10471/55329/65062/51602/3998/25926/134637/26354/26135/7514/11168/7443/11198/57489/10556/3161/80173/55726/1964/54465/5558/3151/142940/6418/1653/7570/10733/64417/55728/103…
HMGN5	21	0.835886	1.74128	0.0311685	1	683	tags=67%, list=12%, signal=59%	27018/79682/91057/4085/5427/7153/81624/1063/85444/151246/11169/54069/30061/55329
SET	113	0.543382	1.41917	0.0327086	1	818	tags=31%, list=15%, signal=27%	3925/3945/3326/55536/65008/28969/84319/3146/5037/4869/6632/142/55342/10576/5471/27346/10606/1736/6185/54517/113174/4691/58477/79649/23468/84140/65062/10969/3998/23301/26135/55750/11168/55752/10325
DAXX	284	0.416231	1.16584	0.0359003	1	1284	tags=42%, list=23%, signal=34%	79022/4830/51659/79077/84319/10591/746/5425/2193/54865/26517/90480/64105/10436/4172/84300/85413/51154/78988/378708/84284/1163/4331/5888/51258/28958/516/55651/2237/84937/84296/29902/8479/65993/7866/55152/54069/55847/58477/84140/65094/54903/10969/84939/51021/10455/2618/196294/51079/80227/10061/55750/1312/5438/55120/55110/326625/10963/1479/7157/81890/26995/5832/9277/79033/10856/10134/51023/26263/603…
HIC1	42	-0.764035	-1.42261	0.0391677	1	837	tags=50%, list=15%, signal=43%	23308/51621/267/2889/127829/5914/7187/5045/54434/90427/10019/4790/7048/752/55625/8202/5971/8303/4791/4067/415116
SUV39H1	12	0.8484	1.639	0.0416727	1	437	tags=42%, list=8%, signal=38%	9088/4176/4174/8208/113130
HDAC1	315	0.409498	1.20112	0.0428896	1	1278	tags=41%, list=23%, signal=34%	66005/3945/79022/4830/55536/51659/79077/84319/10591/5425/5037/54865/26517/4176/10436/9349/4172/6147/25911/51154/28978/400986/378708/84284/1163/10954/79622/6632/113802/80127/142/516/55651/2237/84296/5984/29902/5575/27346/1736/8479/6185/7866/4691/468/55152/60509/54069/58477/594/23468/84140/65094/10969/51021/10455/2618/51079/80227/51491/55750/1312/5438/5860/7443/11198/94081/4723/151313/23640/51293/2…
LMNA	18	-0.836989	-1.43775	0.043364	1	340	tags=61%, list=6%, signal=58%	5916/64127/2014/5339/3955/968/6277/79026/824/6281/2859
SMARCD3	12	-0.882544	-1.46244	0.0440967	1	511	tags=67%, list=9%, signal=61%	10326/3101/150372/3689/313/3684/29992/2268
SMAD3	26	-0.816512	-1.4578	0.0441176	1	654	tags=54%, list=12%, signal=48%	54434/23315/23533/29933/3656/57600/8202/5141/10892/4791/6452/3460/124935/7057
DBP	129	-0.660556	-1.32212	0.046841	1	1048	tags=30%, list=19%, signal=25%	3663/2548/1445/162979/9572/26469/11006/3784/7454/92799/51043/8774/27163/3705/27166/115727/3748/23528/8742/6688/7942/2209/63940/4542/2760/6945/1200/3689/920/6813/128346/11027/23406/6277/7940/7305/1890/1471/6404
DEAF1	184	0.471801	1.25824	0.0468852	1	965	tags=42%, list=17%, signal=36%	2593/9315/129080/4145/6666/4171/3615/56953/23209/5425/6300/6941/7374/3182/5902/8607/133308/7915/284184/51154/83743/10785/84941/2189/6723/142/23170/2288/4796/57418/197358/91319/489/25886/3418/471/7108/79711/113655/9415/1019/26284/10514/1468/80233/84939/79724/8568/6621/10061/5860/29901/29920/9401/10901/201255/3033/4723/221188/23640/90378/51073/7157/93185/54496/29985/253769/10155/26995/5832/9277/790…
E2F1	149	0.475419	1.26295	0.0482461	1	835	tags=25%, list=15%, signal=22%	7298/4171/4173/4605/81620/5111/4678/4998/9349/6147/4174/400986/6164/10376/2189/8318/6723/993/708/4001/4796/8704/2305/3418/10541/79711/7468/10514/6152/143888/284403/1786/10189/57521/29901/9401/201255
PCGF1	34	0.713786	1.54642	0.0494672	1	599	tags=35%, list=11%, signal=32%	6169/6167/7311/199990/6161/6155/6158/6143/401115/6141/9735/11169
DNMT3B	14	0.802149	1.61859	0.0530336	1	610	tags=57%, list=11%, signal=51%	129080/23209/7915/197358/489/7108/9415/9053
ZNF202	214	0.450023	1.2541	0.0533486	1	1483	tags=50%, list=27%, signal=39%	6666/4602/5588/7374/133308/135293/7915/4175/4507/83743/79723/142/57546/55342/5311/6894/160897/197358/29902/166647/54517/23598/22869/10514/1021/54903/64794/84939/8568/6621/23301/26354/25888/152185/27130/401251/10325/55835/115950/55622/1479/27340/7157/26751/5558/54496/29985/253769/64434/5832/9277/53615/7343/7705/55813/26094/11128/57496/9875/25929/90861/124454/60526/84899/2967/64921/51434/54919/5378…
ATF3	10	0.815702	1.5445	0.0543808	1	496	tags=30%, list=9%, signal=27%	3725/10365/2354
CREBL2	205	-0.623813	-1.26885	0.0553191	1	715	tags=21%, list=13%, signal=19%	53840/79815/4668/55852/10384/26469/28962/10008/51411/23196/5452/25939/84689/10553/6778/401494/51324/340527/11329/55646/9936/3055/27284/221656/123041/64231/3597/5547/7100/83937/2533/11024/834/313/89790/221472/6916/6404/388325/2799/58475/10875/51816/120425
UNK	63	-0.720986	-1.36953	0.0557491	1	396	tags=19%, list=7%, signal=18%	5724/2512/255809/54210/126364/7378/1051/8676/6282/51296/3958/10437
ZBTB47	338	-0.593236	-1.22595	0.0567951	1	1166	tags=30%, list=21%, signal=25%	23526/200014/55367/84254/79650/5753/5029/51092/10209/7084/113/5580/246330/51185/3663/2548/1445/151056/4668/55852/5330/26469/55911/9610/9612/10008/3784/7454/23196/4627/92799/9123/9961/51043/64072/11188/51526/79716/64218/1774/26020/219931/257106/2870/84034/2137/6256/3705/116985/79888/2101/3683/151742/6778/23654/7320/141/647135/140885/8742/340527/254102/6688/8741/65220/7942/2209/4542/3055/2316/58480…
KAT2A	214	0.439372	1.16863	0.0586392	1	1276	tags=50%, list=23%, signal=40%	66005/6666/204/5425/6300/2193/54865/4678/7374/3182/4172/8607/7915/51154/286467/4507/1663/51768/10785/84941/2189/142/23170/2288/4796/6894/64098/29902/5575/8479/471/7108/7866/54058/113655/399687/594/10514/101929147/84140/55759/54903/3181/64794/80233/84939/55764/2618/8568/6621/10061/152185/5860/401251/29920/9401/201255/63910/4723/326625/151313/7157/26751/54496/81890/253769/26995/5832/9277/79033/5361…
HMGN4	25	0.727382	1.52685	0.0606271	1	6	tags=4%, list=0%, signal=4%	3925
FOSB	20	0.738893	1.54861	0.0659416	1	211	tags=20%, list=4%, signal=19%	1958/3725/10370/10365
ZFP64	204	0.427604	1.15402	0.0660742	1	1080	tags=33%, list=19%, signal=28%	9315/5336/6666/4171/4602/6300/6941/7374/3182/8607/7915/51154/4507/83743/2189/6723/142/23170/4796/8655/64098/471/92935/23598/65993/51148/8574/113655/26284/64110/10514/54903/1468/80233/5191/84939/79724/8568/6621/6487/10061/29901/29920/201255/90378/7157/54496/29985/253769/10155/26995/5832/9277/53615/7343/2068/3978/26094/60386/9875/25929/90861/124454/7753/10598/5188/10101/84306
CBX6	29	-0.774816	-1.37725	0.0681818	1	631	tags=41%, list=11%, signal=37%	23315/23533/10043/284129/84957/5770/11054/55361/9770/9922/7378/124935
PRDM11	216	0.426037	1.22054	0.0745112	1	1050	tags=31%, list=19%, signal=27%	6666/4171/4602/10220/56953/6300/7374/3182/8607/133308/7915/4507/51768/1953/23170/2288/4796/6894/8831/489/166647/23598/7108/79711/113655/9415/54836/399687/7468/10514/1021/54903/64794/80233/84939/79724/55764/8568/6621/6487/10061/57521/152185/29901/29920/9401/8924/201255/115950/116840/2194/54496/29985/84033/253769/10155/64434/53615/7343/2068/140680/9486/11128/9875/25929/90861/124454/7753
HOXA10	11	0.816824	1.57463	0.0754133	1	310	tags=27%, list=6%, signal=26%	3205/389289/399726
ZNF511	154	0.473079	1.31925	0.0792908	1	474	tags=8%, list=8%, signal=7%	6320/3146/199990/79915/10360/10198/91298/55352/29937/4828/1072/5471
ZBTB9	22	0.717226	1.51794	0.0856405	1	1315	tags=68%, list=24%, signal=52%	9767/8831/23598/22869/57343/55659/163087/27340/9486/92595/26230/56061/284309/10795/9329
CHCHD3	311	0.398063	1.14657	0.0866362	1	441	tags=17%, list=8%, signal=17%	400668/2593/100506844/4145/6175/4282/4830/6168/6224/3921/2882/6167/4833/6157/3615/6182/6176/6142/140465/6171/6300/84326/84650/5478/6228/199990/6193/6161/5902/10133/10360/8607/254552/4831/2091/284184/8673/811/4736/328/55352/29937/6130/57819/80097/6723/708/6143/11007/200916/6201/6122/6187/6124
ZNF681	38	0.63952	1.47911	0.0905231	1	1473	tags=76%, list=26%, signal=57%	9331/135293/79723/55342/160897/10576/166647/10606/54517/84140/64794/3998/23301/55843/55726/26751/5558/84083/57496/25929/5378/162655/4436/23173/84503/138199/27316/80184/340481
ZNF713	291	-0.576897	-1.20027	0.0906282	1	449	tags=4%, list=8%, signal=4%	1396/152007/2512/255809/968/10577/6282/1508/5199/2207/10437
SNAI3	21	-0.768838	-1.34605	0.0966443	1	628	tags=48%, list=11%, signal=42%	3663/1445/1201/8742/8741/10287/4542/6945/7305/6404
ZNF781	16	0.728729	1.49365	0.101083	1	337	tags=38%, list=6%, signal=35%	11224/6633/9349/6659/6147/6164
JUND	24	0.668189	1.44304	0.102459	1	288	tags=25%, list=5%, signal=24%	6218/6181/125144/10370/84650/29893
STAT4	23	-0.772322	-1.3703	0.103268	1	126	tags=17%, list=2%, signal=17%	6249/9101/5788/330
ZNF438	45	-0.704091	-1.30634	0.105137	1	529	tags=38%, list=9%, signal=34%	54103/4671/1389/201799/64747/137835/55852/63901/4126/27284/23092/120/1955/834/6507/953/1806
JAZF1	34	-0.716055	-1.30641	0.105711	1	374	tags=18%, list=7%, signal=17%	26020/6256/10098/645/80896/948
BCL11A	82	0.513433	1.32492	0.106776	1	1039	tags=32%, list=19%, signal=26%	11224/100507303/6633/9349/6147/51690/400986/6164/378708/55651/84937/6152/51079/80227/5438/23635/132299/80173/10134/64417/57730/100129250/201254/513/84798/81892
PRMT6	15	0.707007	1.41066	0.109848	1	1449	tags=87%, list=26%, signal=64%	83743/142/116028/92935/9538/64110/7343/54433/54919/10424/51204/9070/10329
PRMT3	486	0.339719	1.04601	0.110078	1	1325	tags=31%, list=24%, signal=26%	5567/79682/3178/65008/1111/3146/79915/262/79075/5427/4175/10198/3320/79723/9793/81624/7272/10721/7486/55215/83990/55342/5311/6894/160897/10576/5471/5984/10606/7733/23642/51018/85444/1736/9735/57181/54517/137682/3187/151246/113174/28981/11169/22869/64395/79598/23468/84140/3181/65062/4927/51602/3998/25926/134637/55127/2618/23301/26354/285349/26135/25888/7514/152185/55120/11168/339324/57650/55843/64…
ZNF737	24	0.645446	1.36414	0.110638	1	1494	tags=83%, list=27%, signal=61%	9767/10389/22869/440515/7693/339324/163087/81931/90338/51427/284391/284309/57534/10795/84503/7743/9668/56916/154007/57189
FOSL2	72	-0.668065	-1.27989	0.111369	1	875	tags=49%, list=16%, signal=42%	26524/6455/11021/56270/90007/51643/58476/26093/8408/23787/5252/23308/51621/137964/7030/51343/5914/1453/128866/90427/10019/9267/3720/90874/752/8178/55625/23268/84957/5339/5209/9846/2683/4791/415116
ZNF133	194	0.427821	1.16438	0.114977	1	1275	tags=40%, list=23%, signal=32%	204/2193/54865/6941/7374/3182/4172/8607/51154/4507/10785/349565/28958/64098/29902/25886/8479/471/7108/113655/26292/64110/101929147/55759/65094/54903/80233/84939/2618/8568/80227/23301/10061/55750/5860/29920/10325/201255/672/55110/1479/151313/7157/26751/54496/253769/26995/5832/9277/53615/7343/2068/60386/401207/11128/55840/245812/90861/124454/5188/60526/90529/54919/79149/5378/55011/5437/64949/3703/2…
ZNF709	300	-0.569752	-1.18054	0.116803	1	635	tags=10%, list=11%, signal=9%	23528/8742/5966/2209/10287/10672/4542/3055/10326/6945/84458/27036/169200/64231/920/6813/83937/313/128346/968/11027/6277/7305/221472/1890/6404/29992/2268/2207
TCF7	41	-0.7011	-1.29186	0.122128	1	756	tags=22%, list=14%, signal=19%	4050/151556/255394/7074/150864/113791/6322/2534/330
ZNF492	11	0.74791	1.42706	0.126354	1	1316	tags=64%, list=24%, signal=49%	7561/7693/51427/284391/284309/10795/84503
FOXO1	64	-0.679464	-1.28937	0.12691	1	911	tags=33%, list=16%, signal=28%	1387/5412/57515/5495/154881/9451/571/388403/51696/7430/10672/9267/7048/113791/51429/2872/51274/3091/6934/2309/9595
KLF2	27	-0.746603	-1.32588	0.127226	1	304	tags=22%, list=5%, signal=21%	51673/29800/1263/23406/6281/1052
MAFF	71	-0.665671	-1.27806	0.127294	1	826	tags=21%, list=15%, signal=18%	92162/7030/5914/1844/64857/5187/4790/2355/80149/4794/9308/4791/23135/415116/5142
ZNF692	277	0.369914	1.02842	0.131938	1	1225	tags=40%, list=22%, signal=33%	66005/204/6182/79077/8501/5425/6300/2193/54865/6941/7374/3182/8607/51154/4507/1663/8673/10785/84284/55695/349565/2189/23170/51258/28958/2288/4796/57418/8655/64098/29902/25886/8479/471/65993/7108/7866/54058/55152/113655/1019/83596/594/10514/101929147/10471/55759/54903/64794/1468/80233/84939/79724/2618/8568/6621/6487/10061/5860/29901/29920/9401/10901/8815/201255/4723/326625/7157/54496/253769/100129…
ZNF71	32	0.622172	1.39672	0.132159	1	1422	tags=69%, list=25%, signal=52%	5588/142/388567/197358/489/23598/64794/57521/8924/29985/10155/9486/9875/25929/7753/84922/64210/705/7564/23151/2976/6599
NFKB2	286	-0.571991	-1.17692	0.134557	1	832	tags=18%, list=15%, signal=16%	3566/92162/7030/51343/5914/7187/9451/3267/1453/8897/6451/51762/5045/84888/51696/60685/23315/79567/23533/5966/90427/10019/64857/9267/4790/3720/2355/3656/84807/8878/7048/752/8178/80149/4794/84957/5538/5209/9846/2872/5971/2683/8303/56882/4067/3460/602/23135/124935/415116/101/3383
BMI1	20	0.639195	1.36395	0.136929	1	519	tags=10%, list=9%, signal=9%	23412/7733
ASF1A	92	0.485247	1.19496	0.141428	1	1576	tags=43%, list=28%, signal=32%	79915/7153/891/79723/9793/4331/151246/11169/54069/64395/10455/7443/57650/11198/3161/80173/55726/699/142940/1653/7705/64417/56898/10146/10240/28977/1763/8487/10592/29966/4436/55326/348235/56916/64710/55010/79980/22823/6240/9874
ZNF610	70	0.515834	1.22123	0.144652	1	1501	tags=67%, list=27%, signal=50%	64798/55342/160897/29902/166647/54517/84140/54903/64794/84939/2618/23301/285349/152185/55120/10325/1479/7157/26751/253769/5832/51474/7705/84083/11128/57496/25929/7753/60526/10240/84899/5378/51134/162655/84064/101060200/4436/661/254042/79828/138199/1161/26275/5921/80184/9202/199704
ZNF664	115	0.467613	1.18516	0.14722	1	1507	tags=51%, list=27%, signal=38%	9781/23209/7915/9767/1017/4507/10198/9793/220988/5311/6894/160897/197358/489/9415/22869/9053/7468/1021/3181/6621/23301/26354/7514/152185/27130/9414/8924/55835/221188/64434/53615/7343/57496/9875/25929/90861/7753/84899/64921/51701/8518/64770/91749/6293/57534/4076/26013/23151/8672/6426/2976/6599/3295/54497/9202/5422/23028/7155
NR1D1	12	-0.800764	-1.32351	0.147309	1	1028	tags=75%, list=18%, signal=61%	1445/57192/51043/7942/126308/9094/124599/5566/126364
CHD4	143	-0.600858	-1.19798	0.153005	1	332	tags=6%, list=6%, signal=5%	2124/128346/968/10577/6277/7940/23643/2207
CENPT	195	0.405896	1.12784	0.156801	1	1276	tags=36%, list=23%, signal=29%	4171/6300/7374/3182/8607/4507/1663/10785/2189/23170/4796/64098/65993/7108/54058/113655/9415/399687/83596/10514/101929147/10471/54903/3181/64794/80233/84939/79724/55764/8568/6621/6487/10061/29901/29920/9401/201255/4723/116840/54496/253769/9277/53615/7343/2068/3978/79763/1174/140680/9875/90861/124454/10598/5188/60526/7263/9894/54919/55011/78992/5437/64949/2639/64210/705/91433/622/121642/6693/6293/5…
NKRF	394	-0.554411	-1.14487	0.161809	1	178	tags=2%, list=3%, signal=2%	6277/7940/7305/6404/6282/29992/5199/2207/10437
ZNF70	227	0.397996	1.11783	0.165292	1	1283	tags=36%, list=23%, signal=29%	6666/9781/56479/56953/6300/9331/133308/55225/135293/7915/9767/4507/51768/56265/1953/142/388567/220988/5311/6894/8831/197358/489/166647/26086/23598/79711/9415/399687/7468/10514/1021/64794/80233/79724/55764/8568/6621/2887/57521/84747/152185/27130/401251/57605/8924/63910/115950/79969/2194/284001/29985/84033/253769/10155/53615/7343/636/140680/26027/9875/25929/124454/7753/84914/84899/84922/8683/144245…
IKZF3	12	-0.788365	-1.30851	0.171184	1	341	tags=50%, list=6%, signal=47%	285966/79661/162394/151556/6322/330
SKI	18	-0.75008	-1.29305	0.174263	1	1099	tags=39%, list=20%, signal=31%	23308/5048/83931/1453/3716/4790/23135
TDRD3	365	0.376833	1.13794	0.177239	1	1451	tags=39%, list=26%, signal=31%	3326/5567/4602/3178/65008/28969/56479/84319/3146/3329/4678/9331/135293/7915/4175/4507/10198/3320/79723/55342/220988/5311/6894/160897/10576/29902/166647/10606/85444/9735/57181/54517/3187/151246/113174/4691/28981/22869/23421/79598/79649/84140/55759/143888/1021/3181/3192/64794/3998/134637/2618/23301/26354/26135/25888/7514/152185/11168/27130/55752/10325/55843/55835/672/6875/54914/8502/55622/1479/2734…
SCML1	35	-0.68418	-1.25155	0.184673	1	929	tags=20%, list=17%, signal=17%	162394/55088/151556/9101/9975/22936/330
GTF3A	19	0.65767	1.32164	0.188192	1	717	tags=47%, list=13%, signal=41%	9315/28969/5902/6723/708/200916/79621/100188893/1069
ZNF660	132	0.435108	1.14732	0.188927	1	1451	tags=64%, list=26%, signal=49%	286467/10198/79723/9793/55342/160897/10576/5471/166647/80321/112942/57181/137682/113174/28981/81856/124540/79649/101929147/23468/84140/65062/7158/375449/3998/134637/55127/375248/57539/23301/7029/152185/55120/11168/339324/55835/163087/57489/80173/55726/11052/100287765/1653/7705/26263/84083/10314/11128/56898/90338/57496/10146/25929/11232/7675/84914/84899/51626/51434/91147/144245/55132/84172/9557/51…
ZNF554	54	0.5069	1.21893	0.193939	1	1496	tags=63%, list=27%, signal=47%	129080/5588/9767/489/166647/22869/64794/23301/7029/285349/25888/8924/163087/84083/11128/90338/57496/25929/7753/84914/84899/51434/706/55755/57534/84503/26013/349075/65250/6599/54497/9202/57189/23028
PRMT1	272	0.384103	1.11043	0.194775	1	670	tags=22%, list=12%, signal=21%	400668/2593/402/66005/4145/4830/4171/3615/6182/79077/140465/5425/6300/2193/84326/5037/11332/26517/4176/5478/7374/3182/2023/5902/10360/8607/51477/2091/284184/51154/8673/51768/328/10785/84284/6723/708/51258/2288/8704/57418/84316/29902/5575/3418/51253/471/65993/7866/1937/79711/55152/113655/5360/1019/4913/26284/83596/5693/126299/10471
RPS6KA5	129	0.437246	1.16263	0.195613	1	1034	tags=17%, list=19%, signal=14%	6181/3921/3159/6142/7311/6158/400986/6130/57181/286827/81856/375248/80173/100287765/64417/57730/6217/55728/6150/675/6210/10146
ZNF138	229	0.391741	1.11966	0.197697	1	1325	tags=43%, list=24%, signal=34%	5567/65008/84319/91057/64105/9331/135293/5427/10198/79723/4331/55342/160897/10576/7738/8706/5471/29902/10606/51018/80321/85444/54517/151246/113174/28981/11169/22869/23421/64395/594/79649/84140/5557/3998/10455/2618/23301/26354/285349/26135/25888/152185/55120/11168/339324/10325/55843/672/55622/1479/80173/7157/55726/26751/5558/699/51474/1653/7570/7705/84083/81931/401207/11128/56898/57496/25929/7753/…
HELLS	305	0.363479	1.06793	0.197934	1	1058	tags=24%, list=19%, signal=20%	51514/79682/51659/1111/79801/4085/332/64105/79915/9349/6428/6147/63967/7153/400986/378708/10635/29937/81624/11113/6632/8208/10721/55215/113130/2237/1033/387103/5471/5984/147841/1063/27346/51018/51053/990/1736/113174/11169/286827/54069/81856/23594/23468/23234/5557/51602/375248/9134/55120/11168/7443/57650/64151/11198/94081/9928/10556/132299/80173/3151/100287765/1653/64417/57730/6150/5933/675/10146/…
ZNF599	12	0.641948	1.24522	0.207006	1	1041	tags=67%, list=19%, signal=54%	5588/439949/594/23301/1479/26751/57496/25929
ZNF620	260	-0.549781	-1.13704	0.207254	1	630	tags=10%, list=11%, signal=10%	2014/6688/10094/63940/29800/2771/1396/440836/2124/6813/255809/968/11027/23406/10577/6277/7940/7305/126364/1471/25798/6282/6281/29992/308/5199/2207
ZNF3	324	-0.54	-1.11745	0.213849	1	626	tags=9%, list=11%, signal=8%	8742/6688/8741/9101/10094/10287/63940/2771/6945/84458/1436/1396/6715/6574/4193/3597/409/11024/128346/968/11027/5566/23406/7940/7305/1471/6281/23643/2207
ZNF117	77	0.493556	1.19849	0.220779	1	1584	tags=61%, list=28%, signal=44%	4602/3178/56479/10198/6894/3187/22869/3150/1021/134637/57539/7514/152185/27130/401251/79969/27340/253769/5411/7006/84899/64921/8518/1122/64770/57534/4076/10128/26013/7743/150759/56916/65250/6599/5921/22862/80184/54497/340481/9202/23028/7155/81545/58487/4686/9678/54585
ZNF671	193	-0.560125	-1.14134	0.225501	1	626	tags=15%, list=11%, signal=14%	117144/1540/51185/2548/60436/6275/4668/23438/26469/7454/23196/64218/5495/27166/8742/8741/10094/63940/1200/11024/128346/968/11027/23406/7940/7305/1471/6281/2207
REV1	460	0.146643	0.444539	0.22958	1	1473	tags=24%, list=26%, signal=20%	10870/9767/10198/9793/80097/7486/55215/83990/55342/5311/6894/160897/10576/1072/166647/57181/3187/514/28981/22869/64395/79598/1021/4927/7158/64794/25926/134637/1175/55127/57539/23301/26354/285349/23132/7514/152185/55120/339324/55835/163087/57489/27340/55726/100287765/1653/7705/55813/26263/55728/84083/81931/11128/90338/57496/5411/10146/25929/7006/11232/7675/7753/84914/84899/26230/64921/51434/706/27…
ZNF22	312	0.3483	1.00642	0.23373	1	1111	tags=20%, list=20%, signal=17%	4925/3945/23412/5567/4068/65008/3146/4869/262/54941/10198/4331/6632/113802/55342/160897/5471/80321/55916/112942/57181/7979/113174/28981/64395/79649/51602/3998/25926/10455/10081/285349/11168/6613/7443/55835/11198/57489/10556/23635/132299/80173/55726/54465/142940/6418/1653/7705/64417/55728/10314/79101/56898/55081/10146/7675/50808/27248/57587/10240/28977/100505616/7247
SP110	31	-0.67931	-1.20558	0.234257	1	1447	tags=58%, list=26%, signal=43%	151636/51131/91351/4939/27071/4940/94240/53840/10384/3454/6773/63901/10346/57674/54625/2533/4600/9750
ZNF607	117	0.429584	1.09764	0.235849	1	1452	tags=56%, list=26%, signal=43%	5588/54865/79723/55342/160897/197358/29902/439949/54517/28981/594/101929147/84140/54903/64794/84939/2618/161779/23301/285349/25888/152185/55120/10325/672/8502/55622/1479/26751/54496/253769/5832/7705/84083/11128/57496/9875/10528/25929/90861/124454/7753/60526/10240/51434/5378/57147/8518/91433/51134/91749/84064/101060200/4436/254042/79828/84503/6426/27229/80267/1161/26275/5921/10329/80184/9093
NR1H3	66	0.492513	1.16249	0.2375	1	349	tags=8%, list=6%, signal=7%	9379/6300/84650/328/10981
JUNB	11	-0.756461	-1.23306	0.239612	1	423	tags=27%, list=8%, signal=25%	1844/4792/1052
SOX4	67	0.459593	1.13689	0.241611	1	429	tags=24%, list=8%, signal=22%	3945/11224/6633/5037/4869/9349/6147/286467/51690/100131187/400986/6164/4331/6632/79921/55651
ZNF140	179	0.399859	1.07182	0.242012	1	1462	tags=40%, list=26%, signal=30%	5567/10198/79723/9793/4331/55342/160897/80321/57181/28981/11169/22869/81856/64395/23468/65062/375449/80227/23301/7029/285349/25888/55120/339324/55835/163087/57489/1479/80173/55726/100287765/51474/1653/7705/64417/26263/84083/81931/11128/56898/90338/57496/10146/25929/7675/7753/10240/28977/51626/51434/5378/57147/55132/1763/51134/162655/57534/29966/4436/10795/23279/9657/7743/55326/80267/1161/56916/65…
ZNF471	29	0.560064	1.1979	0.243478	1	1618	tags=72%, list=29%, signal=52%	5311/6894/101929147/23301/285349/152185/27130/253769/8518/57534/254042/26013/150759/65250/5921/80184/54497/340481/9202/4686/9913
ZNF568	33	0.56021	1.18835	0.258065	1	1316	tags=61%, list=24%, signal=47%	160897/5471/439949/28981/81856/64395/23468/23301/55120/163087/80173/100287765/1653/11128/56898/57496/1763/162655/4436/84503
ARID3B	55	-0.620055	-1.17198	0.2586	1	1144	tags=38%, list=20%, signal=31%	27342/26959/1540/29110/5894/1105/27125/57169/9766/51343/154881/51322/51762/23315/5966/3720/6867/19/51429/22936/9960
ARNTL	227	-0.549298	-1.12042	0.259375	1	1175	tags=29%, list=21%, signal=24%	84440/285966/9583/26959/100505576/1540/57493/29110/23473/5894/1105/50618/57169/10746/57161/57471/6093/162394/4238/1387/23479/6504/80853/3985/57515/9765/23130/55088/5495/23527/154881/3267/8897/10308/79670/51322/5663/114882/51762/4780/51696/23315/6249/9101/81788/203228/55788/55454/9267/23064/285513/56261/8495/3516/6867/6322/221178/9770/3459/9922/2180/9960/10010/5788/330
ZNF57	15	0.608753	1.20007	0.263333	1	1478	tags=80%, list=26%, signal=59%	7738/7733/113174/163050/163087/7247/10795/84503/7564/8883/126070/90321
ZBED3	182	-0.54196	-1.11378	0.270811	1	524	tags=10%, list=9%, signal=9%	80273/10326/3101/169200/152007/23307/5724/6303/83862/1438/10261/114769/6282/1508/4688/64115/2268/3958
ZNF618	107	0.427786	1.09409	0.271845	1	1422	tags=31%, list=25%, signal=23%	6666/9781/1953/489/23598/399687/7468/1021/79724/6621/57521/84747/27130/8924/79969/284001/10155/7343/140680/84899/84922/84327/6929/23326/22955/4076/26013/22870/23151/613/349075/2976/6599
NFYA	27	0.565449	1.18001	0.273128	1	1461	tags=63%, list=26%, signal=47%	10198/55342/51018/23301/25888/11168/27340/26751/25929/5378/8518/84172/23279/84503/138199/80184/55720
ZNF546	189	0.381164	1.05652	0.275665	1	1487	tags=47%, list=27%, signal=36%	4602/4507/10198/55342/5311/6894/9735/57181/3187/28981/22869/79598/101929147/84140/54903/3181/64794/134637/84939/2618/161779/23301/26354/285349/25888/7514/152185/55120/27130/10325/55835/672/8502/55622/1479/27340/26751/5558/54496/253769/55813/26263/84083/145508/11128/57496/9875/25929/7006/11232/7753/60526/84899/56339/51626/51434/5378/8518/91433/51134/64770/55755/91749/6293/84064/57534/101060200/443…
ZKSCAN7	43	0.523291	1.17229	0.278689	1	1501	tags=63%, list=27%, signal=46%	4507/160897/29902/22869/54903/84939/23301/285349/55120/1479/7157/7705/11128/57496/25929/90861/7753/60526/10240/51434/5378/57147/4436/26275/9070/10329/199704
ELP3	349	0.347038	1.02455	0.279138	1	1352	tags=47%, list=24%, signal=38%	79022/55536/65008/204/79077/84319/5425/2193/3329/54865/64105/10436/7374/4172/8607/4175/85413/51154/286467/4507/10785/84284/349565/4331/113802/142/5888/51258/28958/160897/57418/84937/84296/29902/25886/10606/118980/8479/79621/471/54517/7866/55152/113655/54069/23421/55847/26292/58477/594/101929147/23468/84140/55759/65094/54903/10969/64794/5557/84939/51021/10455/2618/8568/80227/23301/10061/26135/5575…
NRL	60	0.472312	1.11391	0.281081	1	1218	tags=43%, list=22%, signal=34%	8607/10785/55152/399687/83596/126299/10471/80233/79724/8568/8924/201255/116840/54496/23065/26995/9277/7343/2068/1174/100506436/9894/55011/78992/64210/705
ETS1	22	-0.689763	-1.18702	0.281671	1	1261	tags=64%, list=23%, signal=49%	23670/2869/285966/9583/55914/162394/80853/3566/4050/3716/7048/8202/2534/51429
ZNF816	37	-0.635938	-1.15587	0.283544	1	354	tags=8%, list=6%, signal=8%	920/6277/2268
HDAC6	361	0.357396	1.08895	0.285479	1	969	tags=22%, list=17%, signal=19%	129080/5336/6666/4171/4602/10220/9781/56953/6300/4678/3182/8607/7915/4507/1663/51768/6164/10785/1953/2189/23170/4001/2288/4796/643699/6894/8831/64098/489/3418/9196/23598/7108/79711/113655/9415/399687/7468/83596/10514/6152/126299/10471/3181/64794/80233/84939/79724/55764/8568/6621/6487/57521/152185/401251/29901/29920/9401/8924/201255/63910/115950/116840/2194/284001/54496/29985/84033/253769/10155/64…
KLF7	103	-0.571027	-1.12104	0.28781	1	671	tags=17%, list=12%, signal=15%	57161/57471/90268/9765/5495/571/388403/6249/10672/9267/7048/113791/8202/11214/6397/284996/9595
SETMAR	150	-0.552661	-1.11813	0.290672	1	416	tags=4%, list=7%, signal=4%	152007/2512/255809/1508/5199/3958
ZNF485	219	0.359196	1.00455	0.292782	1	1458	tags=54%, list=26%, signal=41%	55536/65008/84319/2193/54865/64105/7374/4172/51154/286467/4507/10198/84284/79723/4331/113802/55342/160897/29902/10606/118980/79621/471/54517/28981/23421/58477/594/101929147/84140/55759/54903/10969/64794/5557/84939/10455/2618/161779/80227/23301/10061/285349/26135/55750/152185/55120/10325/55843/55835/672/55110/8502/55622/1479/80173/7157/26751/54496/253769/100129858/5832/55813/84083/145508/401207/11…
NAP1L5	45	0.495088	1.1327	0.292818	1	1531	tags=49%, list=27%, signal=36%	7561/51018/113174/65062/7693/11168/118672/1653/55728/10314/23270/54934/90407/79088/7247/284309/10795/283209/84503/8883/90321/390980
MXD1	230	-0.543173	-1.10686	0.294421	1	834	tags=19%, list=15%, signal=17%	23130/55088/8774/154881/3267/6386/79670/8780/51762/490/9262/255394/80315/9101/5966/5908/55454/84807/9958/5500/80149/56261/688/4683/378805/3516/5209/3091/3459/200315/57458/597/2180/10010/284996/2204/5788/84981/64092/57162/10135/7150/23710
CHRAC1	41	-0.635262	-1.15365	0.29625	1	1136	tags=27%, list=20%, signal=22%	10434/7786/90203/5879/7439/219771/91544/8428/100128537/123872/54964
JRKL	47	0.483017	1.1181	0.306452	1	1518	tags=49%, list=27%, signal=36%	3329/400986/254013/751071/100129387/375248/161779/80227/55120/57730/26263/79101/11232/10240/56339/84942/400506/51134/101060200/101927597/26275/199704/343099
ZSCAN18	26	0.503285	1.10276	0.308036	1	630	tags=31%, list=11%, signal=27%	129080/5588/56265/1953/197358/489/26086/399687
ZNF551	166	-0.549409	-1.10747	0.309189	1	270	tags=5%, list=5%, signal=5%	375035/23528/5966/128346/7940/7305/1471/2207
DMAP1	143	0.407901	1.05645	0.315217	1	1535	tags=45%, list=27%, signal=34%	4507/83743/1953/2189/142/6894/197358/489/166647/23598/7108/22869/399687/10514/64794/79724/55764/8568/6621/25888/55750/401251/8924/54496/23065/29985/253769/26995/64434/23178/7343/9486/11128/57496/9875/25929/124454/7753/92595/50628/84914/84899/10585/51434/8518/84172/64210/705/6693/10300/6293/7564/26013/23151/25920/2976/9070/55720/10099/57189/8662/9761/1374/23195/26173
RORA	209	-0.540548	-1.09202	0.320794	1	1175	tags=18%, list=21%, signal=15%	84440/285966/167227/100505576/1540/29110/23473/158830/1105/8887/10746/6093/162394/1387/23479/80853/57515/5527/55088/154881/151556/255394/6249/80315/9101/84458/9958/285513/113791/6322/2534/665/10010/284996/5788/7150/330
HIF1A	334	-0.519534	-1.07528	0.32314	1	806	tags=15%, list=14%, signal=14%	5495/154881/9451/571/3267/6386/10308/4084/51322/8780/51762/6646/2308/388403/490/51696/9262/54918/80315/9101/5966/10672/55788/5829/55454/526/3656/9958/7048/5500/285513/56261/4683/378805/3516/6867/5209/10560/51429/3459/6515/2180/9960/2204/2309/64092/57162/10135/7150/5142/9595
ZNF837	275	0.357317	0.975892	0.324151	1	1050	tags=26%, list=19%, signal=22%	6666/4171/4602/56953/6300/2193/7374/3182/8607/133308/7915/4507/2189/6723/23170/708/2288/11007/4796/8704/8655/8831/29902/489/3418/471/23598/79711/113655/9415/4357/399687/1019/83596/10514/10471/54903/64794/80233/5191/79724/8568/6621/90956/6487/10061/57521/29901/29920/9401/201255/3033/115950/5827/90378/7157/54496/29985/253769/10155/9277/53615/7343/2068/3978/1174/140680/27349/9875/90861/124454/7753
SIRT7	40	-0.611286	-1.13042	0.326531	1	867	tags=28%, list=16%, signal=23%	9489/53917/2101/6876/7942/9094/10043/8495/84957/11054/3687
ZNF429	296	0.327862	0.94427	0.328683	1	1034	tags=28%, list=19%, signal=24%	4925/3945/79022/65008/84319/91057/9521/54865/4869/64105/9349/6428/6147/286467/400986/378708/728591/79723/4331/6632/80127/79921/160897/5471/84937/5984/29902/80321/254013/6434/7979/151246/28981/468/11169/54069/81856/23421/64395/58477/594/23468/84140/65094/5557/51602/375248/10455/2618/196294/80227/23301/117177/285349/5438/55120/7443/55843/55835/55110/1479/23635/132299/80173/26751/81890/100129858/583…
GLYR1	160	0.396163	1.05633	0.333333	1	1049	tags=19%, list=19%, signal=16%	5336/6168/25873/6205/6176/6155/9793/2189/142/55215/6165/6207/514/7468/64794/55127/1786/6621/23132/8924/27340/23065/64434/23178/7343/11128/9875/25929/90861/124454
ZBTB7A	127	-0.550432	-1.09546	0.337041	1	549	tags=17%, list=10%, signal=15%	10019/126308/55122/752/55625/79180/84957/5339/79627/10018/51274/9922/2683/7805/7321/25946/604/25798/3460/602/23135
SMARCA4	85	0.428417	1.07984	0.338583	1	1297	tags=62%, list=23%, signal=49%	4171/5425/54865/4176/4678/3182/4172/8607/51154/83743/10785/2189/142/5575/4691/79711/26284/10514/23468/64794/84939/1786/8568/8924/4723/23640/54496/23065/81890/10155/26995/5832/9277/3978/11128/9875/10528/124454/84261/5188/56342/10585/51434/23076/2639/80755/64210/400506/705/7064/10574/83986/661
GZF1	379	0.344122	1.03091	0.342939	1	491	tags=9%, list=9%, signal=9%	402/23521/4282/4830/11224/100507303/6223/25873/6748/79077/140465/6633/10591/746/5425/84326/26517/6421/90480/154467/84300/6635/78988/51690/100131187/27089/6208/521/6209/517/516/55651/10169/140823/84316/55432
E2F2	38	0.467025	1.07472	0.345178	1	498	tags=26%, list=9%, signal=24%	4605/4288/195828/79801/4998/983/11113/7272/11004/1063
ZNF516	10	-0.701089	-1.14196	0.34593	1	1230	tags=50%, list=22%, signal=39%	26523/8650/10475/9489/5663
ZNF141	126	0.414787	1.05704	0.346535	1	1573	tags=44%, list=28%, signal=32%	10198/79723/9793/160897/1072/57181/28981/11169/22869/23468/440515/285349/55120/339324/163087/79744/57489/1479/55726/100287765/7570/7705/55728/84083/81931/79101/56898/90338/10146/25929/7675/79088/10240/706/57147/55132/162655/29966/4436/23173/23279/23318/9657/7743/55326/1161/56916/65250/80184/26019/199704/81545/56985/8880/152926
ZNF221	97	0.413191	1.06043	0.347458	1	1483	tags=53%, list=27%, signal=39%	4507/10198/160897/22869/101929147/64794/23301/285349/25888/152185/55120/27130/1479/253769/7705/26263/84083/145508/11128/57496/9875/25929/7753/84914/60526/51434/5378/27085/57147/8518/84172/55755/91749/57534/101060200/4436/23279/79828/26013/7743/8672/6426/27229/150759/5591/65250/5921/9070/80184/54497/9202
IRF7	12	-0.673541	-1.12081	0.350801	1	1279	tags=42%, list=23%, signal=32%	4939/4940/4615/440836/4600
MEF2A	92	-0.567598	-1.09606	0.352129	1	1317	tags=29%, list=24%, signal=23%	29066/10659/23405/253832/219333/140609/5594/9926/5048/10150/51100/55914/55785/5412/9765/23527/51322/8428/3716/9444/7048/8202/55824/79627/8301/5906/10892
ING5	20	-0.643961	-1.12165	0.356475	1	267	tags=20%, list=5%, signal=19%	118813/5609/968/10577
FOXK1	202	-0.518641	-1.06111	0.357518	1	1396	tags=24%, list=25%, signal=19%	26524/7994/10658/11021/56270/118813/200186/1743/26523/8408/57617/5609/23258/5252/5894/22877/51621/267/57169/91/9766/6533/401548/90268/1387/1408/51343/4650/7187/5170/1453/8897/114789/6451/375035/54434/60685/23315/9267/3720/55625/79585/84957/5770/4215/11214/5971/8303/56882
SIRT5	298	0.36298	1.04274	0.359774	1	1352	tags=48%, list=24%, signal=38%	4830/55536/6182/79077/84319/8501/5425/2193/54865/7374/3182/4172/8607/85413/51154/286467/4507/51768/10785/84284/64798/142/23170/51258/28958/2288/57418/8655/29902/5575/25886/10606/118980/8479/79621/471/54517/7108/7866/54058/113655/23421/1019/4913/594/10514/101929147/84140/55759/54903/2184/10969/64794/80233/84939/2618/8568/23301/10061/1719/1312/152185/5860/29920/55752/10325/10901/201255/672/10012907…
RARA	242	-0.517341	-1.06231	0.361169	1	695	tags=23%, list=12%, signal=21%	6533/3090/4335/2889/119504/10318/4627/4478/127829/7030/5878/10106/5916/114789/5045/54434/60685/79567/23533/128866/90427/10019/64857/126308/2355/55122/7048/752/8178/55625/1912/79585/79180/84957/5339/79627/5598/10018/5604/9846/2872/51274/5141/2683/8303/7805/4791/25946/4067/3460/602/4245/23135/124935/415116
PLSCR1	16	-0.662127	-1.12382	0.361299	1	1434	tags=50%, list=26%, signal=37%	51131/8743/5868/64343/2790/11342/3459/10010
ZNF785	195	0.367931	1.01709	0.362601	1	1307	tags=45%, list=23%, signal=36%	55536/2193/54865/4172/8607/286467/4507/1663/10785/84941/142/57546/84937/29902/8479/7108/54058/55152/399687/101929147/84140/54903/64794/84939/2618/161779/8568/6621/80227/23301/10061/285349/152185/55120/29920/8924/55835/55556/1479/7157/26751/54496/81890/253769/26995/5832/9277/7343/26263/84083/145508/11128/9875/10528/25929/90861/11232/124454/7753/10598/5188/84914/60526/56339/10585/90529/51434/84942/…
STAT1	29	-0.621673	-1.11173	0.363871	1	1476	tags=52%, list=26%, signal=38%	80830/151636/51131/8743/3431/4939/4940/94240/57169/6773/10379/10346/54625/5359/4600
ARNTL2	37	0.445187	1.03251	0.364486	1	480	tags=19%, list=9%, signal=17%	56479/6624/158405/9767/27089/220988/10169
MAFK	131	-0.530727	-1.07084	0.374728	1	1400	tags=27%, list=25%, signal=21%	5900/26524/11021/51643/26093/285550/1743/55700/8408/57617/51621/80305/267/90268/6016/126917/23108/1408/7030/51343/4650/1453/8897/2114/375035/54434/90427/9267/2355/752/8178/55625/84957/9846/56882
ZNF775	10	0.606981	1.12423	0.377419	1	261	tags=20%, list=5%, signal=19%	6666/135293
EZH1	152	0.392229	1.02876	0.380952	1	1129	tags=24%, list=20%, signal=19%	6181/6224/125144/6142/7311/4831/23480/6158/400986/401115/4828/1072/254013/286827/283104/101929147/23468/100129387/55127/375248/80227/5216/55120/57650/100287765/57730/6150/11128/6210/11232/7675/84914/56339/10585/51434/84942
ZNF446	44	0.4626	1.042	0.385714	1	1266	tags=45%, list=23%, signal=35%	84937/7108/55152/124540/65094/84939/10081/4723/151313/54496/81890/26995/11128/10101/10585/84942/23076/400506/7064/10300
ZNF880	21	-0.622672	-1.09089	0.386792	1	1355	tags=29%, list=24%, signal=22%	8446/58515/80213/5527/7320/6993
ZFP62	408	0.344969	1.0261	0.38769	1	1336	tags=45%, list=24%, signal=37%	4925/3945/55536/65008/84319/2193/54865/64105/4172/85413/51154/286467/4507/10198/400986/378708/728591/84284/79723/4331/6632/113802/80127/142/79921/55342/160897/8706/5471/84937/84296/5984/29902/10606/80321/118980/112942/1736/79621/254013/57181/54517/137682/151246/113174/7866/4691/28981/54058/468/11169/54069/81856/23421/124540/58477/594/79649/101929147/23468/84140/55759/65094/54903/100129387/10969/6…
MXI1	64	-0.563833	-1.07565	0.393832	1	1124	tags=25%, list=20%, signal=20%	4942/51099/3663/55544/51312/79065/10098/23654/7320/255394/80315/645/80896/665/64005/7150
RELB	165	-0.52743	-1.06542	0.395945	1	1170	tags=22%, list=21%, signal=18%	285966/23258/26959/10725/64747/5252/1540/27125/267/57169/9766/57471/3090/51411/10318/1408/51343/7187/9451/1453/160760/51322/5045/51696/5966/4790/3720/3656/8878/7048/4794/2872/4791/602/23135/415116
ZNF331	35	-0.603183	-1.08175	0.403206	1	1379	tags=43%, list=25%, signal=32%	80219/23670/133746/283635/23014/826/58515/79939/50640/7454/2117/94056/5966/1390/5500
ZNF425	10	0.568566	1.05723	0.406627	1	1050	tags=60%, list=19%, signal=49%	5588/439949/84939/29985/25929/7753
ZNF251	159	0.379967	1.02423	0.408451	1	1507	tags=39%, list=27%, signal=29%	9781/5588/158405/9767/4637/5311/6894/197358/10169/489/166647/26086/23598/22869/1021/64794/55764/6621/57521/84747/27130/401251/79969/5955/10314/140680/23270/90338/57496/7753/50808/92595/84899/64921/706/84922/8683/57684/144245/57147/8518/6929/6293/57534/22903/4076/26013/7743/23151/349075/56916/65250/2976/6599/154007/22862/54497/340481/9202/57189/23028/7155
ZFPM1	85	0.408185	1.00548	0.413043	1	371	tags=11%, list=7%, signal=10%	2812/56953/9349/6147/5413/283489/400986/6164/55353
ZNF77	19	0.485142	1.03029	0.416667	1	1463	tags=47%, list=26%, signal=35%	22869/81856/163087/7705/81931/11128/57147/7743/126070
ZSCAN9	37	0.436053	1.00702	0.42233	1	1364	tags=46%, list=24%, signal=35%	56265/91283/57343/1175/55659/7693/84747/79744/85364/57684/144245/23326/22903/9329/8898/9668/613
L3MBTL1	305	0.332666	0.962012	0.423108	1	1556	tags=33%, list=28%, signal=25%	5336/4602/9781/23015/9767/4507/10198/4637/9793/1953/643699/5311/6894/197358/489/166647/9196/9735/23598/3187/514/22869/399687/7468/1021/3181/7158/64794/79724/55764/6621/2887/57539/285349/23132/7514/152185/27130/401251/8924/79969/27340/116840/284001/84033/253769/23178/7343/140680/11128/57496/5411/9875/25929/7753/92595/84914/84899/64921/51434/57684/144245/57147/8518/64770/55755/91749/6293/57534/2327…
ZNF347	81	0.406584	1.00457	0.42623	1	1579	tags=54%, list=28%, signal=40%	10198/55342/160897/80321/28981/81856/23468/84140/375449/375248/161779/23301/285349/55120/163087/55726/100287765/7705/26263/84083/11128/57496/10146/25929/7675/84914/10240/5378/51134/162655/101060200/29966/4436/84503/55326/27229/65250/26275/80184/199704/65244/57536/152926/9678
ZNF197	170	0.376248	1.01267	0.426829	1	1463	tags=33%, list=26%, signal=25%	5567/64116/9767/10198/9793/83990/160897/7733/11169/22869/57343/65062/7029/285349/7514/339324/163087/79744/5955/55726/54465/142940/1653/7705/10314/81931/56898/90338/57496/25929/7753/50808/79088/10240/64921/706/57684/144245/57147/55132/1763/284309/57534/4436/10795/4076/9657/8898/7743/9668/55591/56916/65250/154007/22862/126070
TCFL5	109	0.410944	1.01202	0.427184	1	1050	tags=25%, list=19%, signal=21%	5336/4602/4678/7915/283489/23170/4796/92935/23598/22869/10514/143888/1021/80233/79724/6621/57521/29901/201255/10155/64434/53615/7343/26094/9486/9875/7753
THAP3	40	-0.585271	-1.0702	0.427673	1	778	tags=20%, list=14%, signal=17%	85007/7439/91544/1486/9936/2124/54964/9445
ZNF491	46	0.432275	0.998728	0.438503	1	1468	tags=57%, list=26%, signal=42%	4507/29902/101929147/54903/64794/23301/152185/55120/1479/54496/253769/11128/9875/25929/124454/7753/60526/84899/51434/91749/6293/101060200/79828/26275/5921/54497
ZSCAN2	11	0.525198	1.0083	0.444089	1	1232	tags=45%, list=22%, signal=35%	23598/91283/126299/84327/23326
ZNF134	366	-0.495716	-1.03314	0.448065	1	297	tags=5%, list=5%, signal=5%	23528/8742/8741/10287/10672/4790/169200/83937/128346/6277/7940/7305/6404/29992/5199/2268/2207
ZNF33B	289	0.344428	0.977819	0.451401	1	1451	tags=46%, list=26%, signal=36%	5567/4602/3178/65008/5588/9331/135293/7915/9767/286467/4507/10198/79723/55342/5311/6894/160897/10576/8706/197358/29902/166647/10606/80321/85444/9735/57181/54517/113174/28981/22869/23421/79598/79649/101929147/84140/1021/54903/3181/64794/3998/25926/134637/57539/23301/26354/285349/7514/152185/55120/11168/27130/339324/401251/55752/10325/55843/55835/54914/55622/1479/27340/80173/55726/26751/5558/253769…
L3MBTL3	167	-0.51153	-1.03186	0.45571	1	1692	tags=29%, list=30%, signal=21%	57589/7716/66036/3839/9213/153241/8867/57584/79691/6670/10114/3845/9847/142891/54882/2631/23451/4214/29066/23405/24149/9107/55233/9583/5965/23473/10499/50618/10746/51100/6093/55914/5412/57515/23527/9451/5028/571/51322/114882/51696/23064/56261/8030/6867/8202/10892/50650
SMYD2	109	0.380039	0.990936	0.456897	1	1026	tags=26%, list=18%, signal=21%	3326/56479/6300/9331/133308/135293/51768/56265/64798/51162/6723/708/8704/8831/5026/27130/57605/55752/63910/3033/28992/5827/124930/10155/636/140680/1939/9875
ZNF230	10	-0.650887	-1.04677	0.460227	1	975	tags=50%, list=17%, signal=41%	5828/6814/10475/10308/3459
ZNF90	50	0.423931	0.991072	0.460526	1	429	tags=14%, list=8%, signal=13%	10591/9349/6147/27089/400986/6164/55651
ZNF280D	344	0.263545	0.746701	0.461306	1	924	tags=15%, list=17%, signal=14%	5567/4602/6136/3178/65008/56479/3146/4673/9331/55225/135293/9767/4507/10198/4637/6209/83990/55342/5311/6894/160897/10576/7738/23642/9735/22869/3150/79598/79649/143888/1021/3998/25926/23301/26354/128/7514/152185/11168/27130/339324/401251/55843/79969/1479/27340/5955/100506649/55726/1964/26751/54465/5558
ZEB1	192	-0.501097	-1.02191	0.463259	1	1118	tags=14%, list=20%, signal=12%	100505576/1540/1105/50618/10746/6093/55914/57515/55088/8774/5495/51322/114882/23471/51762/9262/9101/5908/55788/84458/9958/5500/4683/3516/6322/5788/330
HDAC4	56	-0.549131	-1.03085	0.464068	1	774	tags=25%, list=14%, signal=22%	51043/2870/3705/116985/2101/6778/65220/4542/2316/3101/23092/953/1890/2799
GATAD2B	180	-0.49963	-1.02052	0.466525	1	1904	tags=33%, list=34%, signal=23%	6667/55667/201627/254065/283149/23429/51780/23476/55593/51317/57178/22926/54870/8816/57589/54878/5586/201475/6655/4205/11044/4289/1314/4204/6309/29066/23405/253832/200186/219333/9320/10095/11057/23258/26959/10725/57085/5048/55810/10746/51100/1387/10318/83931/27245/51088/5495/51322/5663/4780/51696/54434/60685/23673/79567/23064/9444/54926/8202/23433
ZNF821	22	-0.595919	-1.03719	0.470109	1	672	tags=41%, list=12%, signal=36%	9870/23207/9728/7994/2869/267/2308/2872/5971
ZNF286A	29	0.449449	0.95628	0.479508	1	1334	tags=48%, list=24%, signal=37%	51018/375449/339324/163087/57489/1653/55728/90338/7675/23683/56061/162655/23318/10915
ZNF490	49	0.408601	0.951227	0.483146	1	1262	tags=27%, list=23%, signal=21%	10198/9793/22869/81856/163050/163087/7705/11128/90338/57496/57147/84172/162655
ZNF512	353	0.346392	1.02096	0.484258	1	1300	tags=45%, list=23%, signal=37%	3925/55536/65008/28969/84319/5588/2193/54865/64105/9331/7374/4172/133308/81691/135293/7915/286467/4507/10198/51768/79723/64798/4331/113802/142/55342/160897/10576/8706/5471/84937/29902/439949/166647/10606/80321/118980/79621/57181/471/54517/137682/113174/28981/23421/64395/594/79649/101929147/23468/84140/55759/54903/375449/64794/3998/134637/84939/10455/2618/80227/23301/10061/285349/26135/55750/15218…
ZMYND8	88	0.406413	1.01293	0.486486	1	1300	tags=49%, list=23%, signal=38%	91057/5588/64105/5427/10198/79723/55342/10576/10606/51018/85444/9735/54517/6434/54058/594/84140/134637/2618/23301/152185/55120/55843/672/54914/55622/27340/26751/5558/84083/401207/57496/60526/5378/51701/3066/51134/64770/162655/4436/23173/254042/23279
USF1	85	-0.520979	-1.00907	0.486797	1	1427	tags=26%, list=26%, signal=20%	100874272/7297/23053/11021/256364/26093/1743/57617/200014/7786/10844/257106/7439/114789/6451/375035/254102/128866/100128537/2055/56882/79026
THAP7	38	0.411159	0.939073	0.494565	1	1411	tags=34%, list=25%, signal=26%	55695/79622/65094/26995/28986/91893/245812/10101/51728/84262/283951/27341/54939
ZNF48	41	0.420167	0.9642	0.5	1	1166	tags=34%, list=21%, signal=27%	8607/55152/60509/84939/79724/8568/51491/100132774/9277/7343/11128/100506436/10585/78992
ZNF559	201	0.3716	1.03333	0.502294	1	1462	tags=43%, list=26%, signal=33%	5567/65008/10198/79723/55342/160897/51018/80321/85444/57181/54517/151246/113174/28981/11169/22869/23421/64395/79649/84140/134637/2618/23301/285349/25888/152185/55120/11168/10325/55843/55835/672/55622/1479/80173/26751/51474/1653/7705/64417/26263/84083/401207/11128/56898/57496/10146/25929/7675/7753/60526/10240/28977/84899/51626/64921/51434/5378/57147/3066/84172/1763/51134/64770/9933/10592/162655/84…
NFE2	24	0.438559	0.934811	0.502415	1	749	tags=33%, list=13%, signal=29%	2193/54997/847/25911/80127/54058/54903/81577
ZNF830	64	-0.519409	-0.99209	0.502904	1	568	tags=9%, list=10%, signal=9%	10287/4542/409/11027/5566/23406
MRGBP	41	-0.542246	-0.992041	0.510507	1	1408	tags=29%, list=25%, signal=22%	1849/3340/80727/1209/1445/7016/3705/27166/3748/6688/7942/6945
CDYL2	54	-0.538024	-1.00411	0.516867	1	999	tags=22%, list=18%, signal=18%	1743/23258/91/401548/119504/1453/8897/375035/60685/90427/9846/56882
GLMP	265	-0.49002	-0.999622	0.519588	1	904	tags=14%, list=16%, signal=12%	7454/92799/2117/8774/64218/5495/1774/3705/10553/27166/115727/51324/8742/8741/5966/10287/63940/2760/3720/84458/27036/1436/1200/3689/920/5547/6813/11024/128346/968/11027/7940/1890/6404/2799/51816/7150
ZNF253	96	0.384134	0.964142	0.523364	1	1483	tags=42%, list=27%, signal=31%	9331/135293/9767/10198/55342/160897/22869/440515/23301/285349/339324/163087/1479/7705/81931/90338/57496/25929/7753/50808/10240/84899/51626/64921/51427/57147/1763/57534/4436/23279/7743/56916/65250/2976/154007/5921/22862/54497/340481/9202
CC2D1A	344	0.204313	0.604969	0.524212	1	982	tags=17%, list=18%, signal=15%	5336/4171/4602/6300/6941/7374/3182/8607/1017/4507/1663/2189/23170/4796/8704/8655/8831/64098/65993/7108/8574/113655/9415/399687/83596/10514/10471/54903/1468/80233/84939/79724/8568/6621/90956/6487/10061/57521/29901/29920/9401/201255/115950/64423/116840/90378/2194/54496/29985/253769/10155/9277/53615/7343/2068/3978/79763/1174
NFATC3	370	0.266391	0.781464	0.524911	1	796	tags=10%, list=14%, signal=9%	11224/25873/6748/9781/746/5588/6421/55225/55159/9767/283489/10198/27089/4637/6208/521/9793/6209/220988/5311/6894/197358/10169/140823/489/23598/514/22869/7468/79598/1021/26053/1175/51079/23132/7514/152185/27130
ZGPAT	37	-0.53279	-0.980605	0.52802	1	1073	tags=22%, list=19%, signal=18%	113/114826/85007/6793/11188/10801/8514/8767
SP140L	19	-0.567718	-0.970626	0.528276	1	1836	tags=42%, list=33%, signal=28%	8417/6815/29945/5934/3431/10384/63901/120
SETD4	320	-0.479516	-0.998067	0.528689	1	279	tags=5%, list=5%, signal=5%	55508/55122/79180/148022/51274/2683/23406/8870/7321/604/2495/25798/8676/3460/602/728
TDRKH	22	0.435008	0.911406	0.528689	1	186	tags=9%, list=3%, signal=9%	79022/54865
ZBTB43	227	-0.491043	-1.00135	0.531315	1	1096	tags=19%, list=20%, signal=16%	1540/29110/5894/1105/5791/57169/64397/9766/10746/6093/93129/7454/2117/8774/5611/154881/94056/10308/79670/79660/8780/6646/490/23528/6249/9101/5966/5908/55454/9267/3720/84458/5500/378805/4193/5770/6867/19/11214/3459/9960/7378/84981/7150
CBX7	49	-0.529606	-0.991376	0.532468	1	1847	tags=49%, list=33%, signal=33%	2145/23214/50488/9665/3300/285512/22821/4524/89846/10347/3631/9159/23053/57654/84440/79767/79065/57658/6793/23130/5170/57674/3482/9764
PHC1	53	0.392147	0.931501	0.533333	1	955	tags=36%, list=17%, signal=30%	6300/1953/142/8831/489/26086/7108/79711/9415/399687/64794/84939/79724/55764/27130/8924/93185/253769/7343
ZNF267	400	-0.483019	-0.998849	0.534954	1	1183	tags=17%, list=21%, signal=15%	9107/55233/285966/221037/2181/26959/10725/1540/29110/23473/5894/1105/27125/50618/51014/57169/10746/51100/57471/6093/4238/54790/5932/5412/57515/51088/55088/5495/23527/154881/9451/571/3267/6386/51322/8780/114882/23471/51762/4780/84888/51696/23315/54918/6249/9101/5966/10672/5908/55788/55454/23064/84458/5782/9958/56261/4683/114294/3516/6867/19/3091/3459/10892/9960/10010/5788/64092/330
IRF9	18	-0.581289	-0.973187	0.538566	1	2090	tags=72%, list=37%, signal=45%	6672/54739/4599/3437/83666/80830/3659/51131/94240/1540/57169/3669/54625
TOX	12	0.467869	0.898118	0.542955	1	956	tags=67%, list=17%, signal=55%	5588/55342/80321/3608/375449/11168/23635/6418
SCML2	42	-0.528073	-0.971582	0.5459	1	178	tags=5%, list=3%, signal=5%	6277/64115
PPARD	51	0.401198	0.942535	0.545977	1	2	tags=2%, list=0%, signal=2%	400668
TRERF1	179	-0.480735	-0.97808	0.546926	1	1003	tags=30%, list=18%, signal=26%	23250/221/284759/160/4055/54776/11078/57140/8446/411/256364/81622/57175/140739/5062/112597/58515/9909/23526/2548/55852/26469/9612/4335/7454/23196/92799/1729/51043/91373/2870/84034/3705/116985/6778/115727/7320/6688/65220/9936/4542/2316/221656/1200/80709/5500/55701/157/2185/92241/64005/1890/10312/2799
ZNF518A	333	0.342661	1.00307	0.550347	1	1488	tags=37%, list=27%, signal=29%	5567/4602/65008/6176/3146/4507/10198/79723/83990/55342/5311/6894/160897/10576/5471/10606/51018/85444/9735/57181/54517/151246/113174/28981/11169/22869/79598/79649/84140/1021/3181/3998/134637/55127/57539/23301/26354/285349/25888/7514/152185/55120/11168/27130/55752/10325/55843/672/54914/55622/1479/27340/80173/26751/54465/5558/699/253769/51474/1653/7705/55728/84083/145508/57496/10146/25929/7753/60526…
SMARCC1	423	-0.47661	-0.989908	0.552419	1	405	tags=4%, list=7%, signal=4%	9114/637/2512/255809/83862/497661/10577/6277/7305/9473/6282/1508/2207/3958/10437
ZNF234	178	0.366918	0.991573	0.557469	1	1452	tags=49%, list=26%, signal=37%	84319/2193/54865/4172/286467/4507/79723/4331/160897/84937/29902/80321/28981/54058/23421/101929147/23468/84140/55759/54903/64794/84939/2618/161779/80227/23301/285349/55750/152185/55120/10325/55835/55622/1479/80173/26751/54496/5832/7705/55813/26263/84083/145508/401207/11128/57496/10528/10146/25929/90861/11232/7675/124454/7753/60526/10240/2967/56339/90529/51434/84942/5378/55319/57147/2639/400506/511…
FOXH1	24	-0.538886	-0.948079	0.566452	1	1122	tags=25%, list=20%, signal=20%	7786/90203/7439/91544/123872/54964
CHD1L	220	-0.470878	-0.968244	0.56893	1	310	tags=7%, list=6%, signal=7%	440836/255809/968/23406/7805/6277/7305/126364/2495/25798/3460/6282/6281/51296/2207
TRAFD1	42	-0.516736	-0.951068	0.573871	1	994	tags=21%, list=18%, signal=18%	143384/10087/91445/23438/64397/9489/55508/5770/54964
AKNA	339	-0.474434	-0.980746	0.578411	1	1444	tags=30%, list=26%, signal=24%	1455/9704/23250/25994/160/54776/3631/3340/11078/9550/7297/57140/23053/256364/2011/81622/5062/79651/7392/57654/5973/2664/115992/58515/24149/80727/9909/88455/201176/23218/23526/200014/11138/5594/55858/23396/7077/84905/80305/1445/5330/55911/9612/9854/118788/4335/2889/830/4261/7454/23196/4627/83931/51043/11188/23338/79716/5611/4650/219931/257106/5170/2870/84034/2137/3705/116985/79888/3683/6778/23654/…
ZNF439	48	0.392832	0.922276	0.582781	1	1307	tags=58%, list=23%, signal=45%	55536/5588/9331/286467/10198/166647/101929147/84140/64794/23301/285349/152185/63910/26751/253769/84083/11128/57496/7675/84914/84899/51434/326624/51134/101060200/23173/254042/79828
STAT2	61	-0.49932	-0.948331	0.583235	1	2126	tags=54%, list=38%, signal=34%	10559/80279/18/23424/4938/79591/54739/6890/9095/4599/54838/4905/55748/83666/80208/143/3551/151636/3631/91351/3431/4939/11311/4940/113/53840/114826/63901/10346/57674/55577/54625/4600
ZBTB12	131	0.368656	0.947316	0.584416	1	1059	tags=33%, list=19%, signal=27%	79948/6300/3182/10360/8607/811/10785/23170/4001/4796/8704/79711/113655/399687/83596/10514/126299/10471/80233/79724/8568/6621/90956/6487/57521/29920/9401/8924/201255/2194/54496/253769/10155/53615/7343/2068/1973/79763/1174/9875/100506436/124454/10598
ZNF200	156	-0.483774	-0.961992	0.586794	1	1750	tags=31%, list=31%, signal=22%	55012/27436/101927275/55773/23161/54878/5586/996/324/51128/9950/23253/6814/9541/4289/143384/6309/51131/10087/23075/9648/167153/5868/27342/9748/64343/91445/5965/23473/8887/3454/6093/162394/4238/11342/57515/9765/55088/154881/10308/5663/4780/6249/9101/1390/94120/3516/3459/10010
TIGD6	32	-0.515927	-0.926349	0.590621	1	1122	tags=19%, list=20%, signal=15%	7786/90203/7439/91544/123872/54964
ZNF680	198	0.339603	0.932684	0.591837	1	1410	tags=37%, list=25%, signal=29%	5567/3146/79915/10198/54149/9793/160897/7738/5471/7733/51018/80321/151246/113174/28981/11169/22869/81856/64395/440515/65062/3998/25926/285349/55120/11168/339324/55835/163087/57489/1479/80173/55726/54465/699/142940/1653/7570/7705/64417/10314/81931/56898/90338/57496/10146/7675/10240/28977/51626/64921/51427/57147/3066/55132/55345/1763/8487/162655/29966/4436/8669/23173/10795/23279/84503/9657/10915/55…
THAP11	358	-0.468546	-0.975	0.595142	1	1069	tags=19%, list=19%, signal=16%	7077/51185/3663/2548/1445/23096/6275/4668/162979/8887/26469/9610/9612/2746/57514/11006/3784/7454/23196/92799/51043/2117/5527/51526/5611/1774/27163/94056/7016/2137/10903/3705/3683/27166/115727/23654/7320/3748/140885/8742/6688/2209/63940/29800/2771/7094/6945/84458/1200/54926/6715/5500/79180/920/3597/6813/968/5566/64005/23406/7305/25946/1471/6404/2799/6281/4245/219972
JADE1	261	-0.465273	-0.95854	0.596292	1	635	tags=8%, list=11%, signal=7%	8774/7076/83442/27166/23528/2014/6688/9975/63940/6945/1396/150864/6574/6867/6430/968/7940/7305/1471/2207
HIVEP2	86	-0.47894	-0.933662	0.598194	1	1301	tags=19%, list=23%, signal=14%	23405/219333/9320/9583/5594/5048/222658/51088/9765/5663/4780/3716/23064/7048/8202/10892
FOXP3	18	-0.541803	-0.924643	0.599476	1	1572	tags=39%, list=28%, signal=28%	10068/9159/23492/7786/6793/57674/100128537
ARNT	298	0.341522	0.995064	0.601991	1	473	tags=8%, list=8%, signal=7%	23521/5336/4282/6168/6137/6223/25873/6205/6176/6227/6161/6155/4507/10198/6208/9793/80097/6209/55215/83990/5311/160897/6141
ZNF790	24	0.413949	0.886914	0.609959	1	1444	tags=54%, list=26%, signal=40%	81856/283742/100129387/23132/100132774/11128/100506436/84914/84942/27085/101060200/27229/101927027
ZNF606	404	-0.462594	-0.962688	0.617172	1	267	tags=2%, list=5%, signal=3%	968/7086/23406/6277/7940/7305/1471/6281/5199/2207
ZNF625	55	-0.494789	-0.927035	0.619952	1	267	tags=7%, list=5%, signal=7%	968/11027/7940/7305
ZHX3	33	0.378288	0.827848	0.62	1	1026	tags=21%, list=18%, signal=17%	23331/7468/23132/57521/8924/27340/9875
ELF3	25	-0.518733	-0.910837	0.621134	1	1959	tags=40%, list=35%, signal=26%	54520/5306/196883/7109/23347/54882/23473/80853/6876/23315
MXD3	79	-0.481776	-0.930593	0.623596	1	1141	tags=30%, list=20%, signal=25%	51170/5753/90203/246330/55911/85007/6793/9123/9961/9489/53917/6256/116985/2101/9051/91544/1201/7942/3055/3101/23307/5724/123872/64115
ZNF566	164	-0.46305	-0.93836	0.624052	1	381	tags=7%, list=7%, signal=6%	440836/79180/5728/255809/968/1522/6277/7305/1471/6281/5199
ZBTB22	241	-0.458259	-0.939023	0.629016	1	1642	tags=29%, list=29%, signal=21%	9138/5253/25777/150465/3551/5585/23030/4700/5720/867/84247/10723/124997/10250/80271/5089/1455/160/54776/3631/3340/11078/7297/57140/23053/256364/7392/2664/170394/58515/80727/9909/57326/23526/200014/5594/23396/1445/4627/83931/4478/23338/10844/4650/219931/257106/5170/7016/2870/2137/3705/116985/6778/23654/7320/60685/254102/55967/2316/1794/7094/57217/9679/80709/476/8514/4853/55701/64005/57580
ESRRA	144	-0.465372	-0.929948	0.634279	1	1166	tags=24%, list=21%, signal=19%	23526/84254/91860/5753/7786/90203/7084/246330/55911/85007/9123/9961/10844/91373/219931/257106/2870/6256/116985/6778/254102/7942/4542/3055/2316/7094/23307/5447/55701/1522/2185/64005/953/131870
KLF13	273	-0.460493	-0.94565	0.634855	1	1427	tags=28%, list=26%, signal=22%	100874272/9619/5900/26524/7994/23053/6455/11021/56270/80148/51643/125150/26093/285550/1743/9903/55700/8408/23787/57617/11057/5609/9583/5252/23308/5894/27125/267/57169/9766/6533/401548/3090/90268/2889/119504/6016/126917/1408/51343/5914/4650/5170/1453/8897/8140/114789/6451/5045/51696/375035/54434/23315/128866/90427/10019/55646/9267/3720/2355/9679/752/8178/55625/23268/79585/84957/5770/6867/4215/5339…
HIC2	38	-0.485754	-0.89815	0.638923	1	1393	tags=21%, list=25%, signal=16%	9159/118813/79939/51621/9766/1453/10094/5770
ZNF641	41	-0.481423	-0.889104	0.640147	1	2213	tags=56%, list=40%, signal=34%	22900/81847/9895/9725/2580/197258/55252/51135/55717/80208/143/3551/5934/23250/3631/7297/57654/54103/55858/113/11188/6778/7094
ZBTB38	18	-0.516334	-0.894585	0.64465	1	1091	tags=22%, list=20%, signal=18%	57493/23473/55914/864
ZNF320	177	-0.462367	-0.935334	0.646008	1	267	tags=3%, list=5%, signal=3%	968/6277/7305/6281/2207
ZNF844	290	0.174009	0.502567	0.649836	1	853	tags=10%, list=15%, signal=9%	3178/6748/57045/64116/3956/6421/262/9767/4637/7561/10169/55432/90488/7733/7525/22869/91283/64216/57343/7158/65986/25926/1175/55659/7693/7514/339324/163087/6875/79744
ZNF512B	342	0.186052	0.542877	0.649836	1	806	tags=11%, list=14%, signal=10%	129080/6666/9781/746/9349/158405/9767/27089/6164/56265/521/1953/6894/8831/10169/140823/489/26086/23598/514/79711/22869/399687/7468/10514/6152/126299/79724/55764/6621/23132/57521/5438/84747/27130/401251
ZNF343	236	0.336837	0.930247	0.651163	1	1468	tags=44%, list=26%, signal=34%	2193/54865/7374/4172/8607/4507/51768/64798/142/55342/29902/471/54517/113655/10514/101929147/84140/55759/54903/3181/64794/84939/2618/161779/8568/23301/10061/55750/152185/27130/29920/55752/10325/8924/672/54914/8502/55622/1479/7157/26751/54496/253769/64434/5832/9277/51474/55813/26263/84083/145508/11128/9875/10528/25929/90861/11232/124454/7753/5188/60526/2967/56339/90529/51434/54919/5378/57147/8518/8…
ZKSCAN4	19	0.384541	0.828937	0.651877	1	1343	tags=47%, list=24%, signal=36%	285349/7705/55813/26263/11128/25929/7753/57147/7743
ZNF576	25	-0.492127	-0.871399	0.653652	1	332	tags=12%, list=6%, signal=11%	7786/2124/54964
YY1	364	-0.453419	-0.938756	0.65752	1	1144	tags=9%, list=20%, signal=8%	26959/10725/57085/1540/23473/5894/27125/222658/51100/10008/55914/90268/1387/57515/8774/5495/23527/9451/571/160760/51322/114882/51762/51696/9975/10287/8073/8030/6867/6282/29992/5199/2207
ZNF395	399	-0.453152	-0.945597	0.661241	1	822	tags=15%, list=15%, signal=13%	8774/64218/5495/25939/84689/1453/6256/51322/10553/27166/79660/3748/219771/23528/8742/340527/8741/7942/10094/2209/10287/51338/4542/3055/10326/2760/9267/3720/84458/27036/1200/5500/64231/5770/920/6867/6813/11214/83937/11024/285286/313/128346/968/89790/11027/6277/7940/7305/221472/1890/3684/6404/388325/29992/58475/2268/2207
ZNF318	220	-0.451939	-0.92525	0.6625	1	1277	tags=31%, list=23%, signal=25%	7392/57654/115992/11047/29998/80727/9909/88455/3939/201176/23218/23526/896/200014/51092/64855/113/5580/1445/9610/9612/9854/401548/56905/118788/4335/2889/3784/23196/51043/11188/79716/26020/5170/2870/2137/3705/116985/64127/23654/7320/84888/196527/140885/254102/65220/1362/100113407/54502/2316/58480/221656/7094/126308/3074/9679/8030/8495/114885/79180/5339/4853/3482/9922/57580/7088/23158/6452/2799
ZEB2	88	0.371551	0.913067	0.664234	1	429	tags=14%, list=8%, signal=13%	23521/11224/6223/6633/2653/6635/51690/100131187/3094/6209/517/55651
BRPF1	151	-0.453322	-0.917814	0.664502	1	1444	tags=20%, list=26%, signal=15%	1455/3654/26524/23053/6455/2011/55700/57617/5609/22877/1209/51621/267/119392/56905/90268/2889/27245/127829/51343/4650/1453/114789/5045/54434/60685/9679/752/1912/114769
PHF5A	67	0.364616	0.85336	0.666667	1	288	tags=10%, list=5%, signal=10%	6170/6136/6157/3146/494514/10360/29893
GMEB1	171	-0.455288	-0.923942	0.667026	1	1454	tags=26%, list=26%, signal=20%	9870/23207/164/84449/23303/57403/9728/26190/79691/29115/142891/26524/7994/11021/56270/118813/1743/79939/57617/5609/23258/23308/1540/5894/27125/51621/267/60436/57169/9766/90268/147179/1408/51343/1453/375035/5966/4790/3720/23268/5770/6867/11214/128346/5971
ZNF460	250	0.342616	0.979108	0.667715	1	796	tags=13%, list=14%, signal=12%	11224/6748/746/3956/6421/90480/154467/158405/9767/27089/4637/521/517/516/220988/5311/10169/140823/489/514/22869/7468/7188/7158/54539/1175/55127/51079/6631/23132/57521/5438/27130
GATA1	13	-0.520944	-0.858392	0.668947	1	1448	tags=38%, list=26%, signal=29%	259230/116151/51312/10098/645
ZNF706	328	-0.447658	-0.933879	0.674134	1	1728	tags=27%, list=31%, signal=20%	54870/54469/55773/56900/57589/148423/164/7716/3839/5586/8702/9728/8867/84248/22931/51128/5828/79691/6670/23253/6814/9541/55041/4289/23325/79572/58533/3845/143384/55599/51131/142891/51362/23451/9218/10087/9648/29066/57175/23405/167153/5868/200186/2553/9748/9107/55233/221037/167227/9583/26959/1540/29110/158830/1105/51185/50618/51100/57471/6093/23479/57515/55088/8774/5495/10308/51322/8780/114882/234…
CBX4	27	-0.48554	-0.861615	0.675127	1	466	tags=19%, list=8%, signal=17%	90007/7392/4335/55122/114769
ZNF69	137	0.353055	0.898199	0.675325	1	1473	tags=55%, list=26%, signal=42%	55536/5588/286467/4507/10198/55342/5311/6894/8706/29902/166647/80321/28981/594/101929147/23468/84140/1021/100129387/64794/84939/375248/2618/23301/285349/152185/55120/27130/10325/55835/54914/55622/1479/23635/26751/54496/253769/5832/100287765/26263/84083/145508/11128/57496/25929/11232/7675/124454/84914/60526/84899/56339/51434/5378/326624/400506/9557/51134/9933/84064/101060200/4436/23173/254042/7982…
NAT10	269	-0.449755	-0.924307	0.676829	1	343	tags=4%, list=6%, signal=4%	2512/83862/497661/57222/10577/6277/1051/5329/6282/2207/3958
DPF2	47	-0.472928	-0.878242	0.677146	1	188	tags=28%, list=3%, signal=27%	9314/10513/9527/23131/29915/55905/9520/6780/8554/1475/8816/10250/23406
CASZ1	339	-0.447563	-0.93099	0.678173	1	1433	tags=22%, list=26%, signal=17%	142891/9619/54882/26524/7994/6455/58476/125150/7046/29066/5970/200186/219333/29998/8408/23787/9107/285966/9583/26959/10725/5252/1540/23473/5894/1105/27125/51621/50618/267/55810/57169/9766/10746/51100/57471/90268/1387/27245/147179/80853/1408/23130/51343/5495/9451/571/1453/8897/160760/10308/51322/114882/51762/4780/51696/54434/23315/9975/5966/10672/10019/55454/9267/4790/3720/8178/8030/84957/6867/514…
NFE2L1	374	-0.446706	-0.93413	0.678463	1	914	tags=14%, list=16%, signal=12%	2889/830/4627/9123/1729/4478/10844/4650/5878/219931/257106/5170/7016/2870/285381/84034/2137/3705/116985/6892/114789/6451/23654/23471/7320/5045/375035/60685/254102/128866/55967/2316/1794/7094/57217/9679/5500/1912/476/100128537/5339/8514/55701/1522/2185/8522/57222/64005/57580/56882/4327/79026
ZNF507	352	0.169559	0.49152	0.680796	1	1234	tags=18%, list=22%, signal=15%	6748/6176/79915/10198/8673/7561/9793/80097/7272/10721/7486/83990/55432/7733/51018/11169/22869/64395/79598/9263/57343/25926/55127/26354/11168/339324/163087/6875/9928/57489/342892/27340/129642/54465/23178/139886/142940/1653/10733/55728/10314/90338/57496/10146/7675/51430/25897/23683/26230/7247/134266/64921/57082/22995/27085/57684/10424/8518/84172/55345/1122/1763/64770/284309
EHMT2	349	0.334675	1.01677	0.683209	1	982	tags=28%, list=18%, signal=25%	4145/5336/6666/4171/4602/56953/6300/2193/4678/7374/3182/5902/10360/8607/133308/254552/7915/51154/4507/1663/51768/328/10785/1953/2189/6723/142/23170/708/2288/11007/4796/8704/8655/8831/29902/5575/489/3418/471/23598/65993/7108/79711/113655/9415/399687/1019/26284/83596/10514/126299/10471/54903/64794/1468/80233/84939/79724/55764/8568/6621/90956/6487/10061/57521/401251/29901/29920/9401/10901/8924/20125…
BRF2	37	-0.474498	-0.867039	0.68375	1	640	tags=8%, list=11%, signal=7%	91544/2124/54964
ZNF527	90	0.36075	0.897507	0.685484	1	1478	tags=69%, list=26%, signal=51%	54941/10198/7561/55342/10576/7738/5471/7733/51018/113174/64395/65062/65986/23301/7693/7029/285349/25888/11168/339324/163087/6875/27340/1964/11052/1653/55728/84083/10314/23270/90338/57496/54934/7675/90407/28977/7247/51427/284391/56061/84172/9557/284309/51182/162655/4436/23173/10795/23279/283209/9668/138199/27316/56916/65250/84950/154007/80184/8883/126070/340481/90321
PHF7	178	-0.448577	-0.909339	0.685561	1	354	tags=3%, list=6%, signal=3%	920/51274/6515/6934/5142/9595
MBD4	394	0.26439	0.767665	0.686945	1	990	tags=16%, list=18%, signal=15%	4925/79682/7311/3146/64105/79915/10360/6428/10198/91298/7153/400986/10635/6130/4331/80127/55215/6143/6124/160897/5471/5984/1063/51018/80321/85444/51053/57181/151246/113174/11169/54069/81856/64395/11320/30061/84140/5557/51602/25926/134637/375248/10455/117177/9134/55120/11168/7443/57650/55843/55835/11198/94081/57489/10556/80173/54465/1653/7570/7705/64417/57730/6217/55728/6150
IKZF1	142	-0.453052	-0.906469	0.687704	1	1313	tags=27%, list=24%, signal=21%	2011/81622/5062/7392/24149/80727/88455/4629/23526/896/51092/113/1209/1445/5912/9612/9854/118788/2889/23196/51043/23338/5170/2137/3705/151742/3748/7942/221656/7094/1200/9679/80709/920/157/2185/57580/8767
ZBTB2	187	-0.445183	-0.907091	0.689692	1	1671	tags=25%, list=30%, signal=18%	7716/3839/3572/6655/9728/22931/6670/6498/3845/142891/80219/23451/9218/29066/5868/22890/9107/55233/26959/51119/29110/23473/27125/51014/50640/10150/10746/51100/55914/54790/5412/57515/9451/571/160760/51322/8780/114882/51762/4780/51696/9975/8073/6322/22936/10892
DAPK3	120	-0.453439	-0.893968	0.696567	1	1374	tags=22%, list=25%, signal=17%	23053/11021/256364/26093/1145/1743/200014/7786/55281/119392/830/4627/9123/137964/10844/4650/219931/257106/7439/114789/6451/375035/60685/128866/476/56882/4327
HDAC11	10	-0.534301	-0.850004	0.69814	1	1061	tags=50%, list=19%, signal=41%	27173/64342/246330/9961/6778
TBX6	366	0.329668	0.987151	0.699951	1	670	tags=11%, list=12%, signal=10%	6320/9315/2171/6182/6300/199990/7374/3182/5902/8607/254552/284184/8673/328/55352/163732/6723/23170/708/11007/401115/4796/8704/5927/1072/8655/64098/9942/471/65993/51148/8574/113655/4357/1019/100188893/5693/10514/10471
CDYL	122	-0.449261	-0.885904	0.702434	1	1942	tags=27%, list=35%, signal=18%	6400/65056/6780/55667/23429/9665/8554/55773/8816/54878/5586/373156/996/324/51128/23253/4289/4204/55004/54882/9748/10095/5048/23473/10150/65125/10746/1387/5495/51322/4780/9101/7150
ZNF543	225	-0.446864	-0.905263	0.712788	1	449	tags=3%, list=8%, signal=3%	1396/169200/968/7940/7305/5199/2207
ZNF132	19	0.372734	0.764636	0.715909	1	1328	tags=42%, list=24%, signal=32%	4507/8924/253769/9875/84914/91749/101060200/26013
KDM6B	269	-0.442217	-0.904858	0.717234	1	911	tags=17%, list=16%, signal=15%	1387/119504/10318/80853/23130/3566/92162/7030/51343/5914/154881/9451/3267/1453/8897/51322/51762/51696/23315/79567/5966/10672/10019/64857/9267/57801/4790/3656/84807/7048/752/8178/80149/4794/9308/5209/2872/51274/5971/2683/4791/1604/84981/602/415116/57162/7150
STAT5B	264	0.323772	0.919508	0.717949	1	1050	tags=26%, list=19%, signal=22%	3326/4171/10220/9781/56479/56953/5588/9331/133308/135293/7915/4507/51768/1953/64798/142/23170/2288/4796/220988/8831/197358/489/166647/79711/9415/399687/7468/10514/5026/64794/80233/84939/79724/55764/8568/6621/23301/10061/57521/152185/27130/57605/29920/55752/8924/201255/63910/54914/8502/2194/26751/93185/54496/29985/253769/10155/64434/5832/53615/7343/636/140680/9875/25929/90861/124454/7753
SOX12	115	-0.439924	-0.872483	0.723757	1	339	tags=5%, list=6%, signal=5%	6303/3459/7378/5329/10135/3958
KDM8	65	0.344781	0.798638	0.726027	1	1283	tags=34%, list=23%, signal=26%	83743/57546/7108/64794/84939/8568/6621/8924/9277/7343/11128/124454/7753/84914/56342/10585/51434/84942/400506/705/6293/101060200
SKIL	447	-0.440342	-0.920673	0.726083	1	1379	tags=18%, list=25%, signal=14%	80219/23670/133746/23451/9218/10087/23014/9648/57175/167153/5868/2553/5973/826/27342/9748/80213/57446/9107/221037/2181/26959/100505576/1540/29110/23473/5894/1105/27125/3965/50618/50640/57169/8887/26469/10746/6093/1387/7454/2117/57515/55088/8774/5611/5495/154881/94056/9451/10308/51322/8780/114882/23471/51762/4780/51696/8742/6249/8741/80315/9101/9975/5966/5908/84458/9958/5500/3516/6867/6322/19/5142…
ZNF273	400	-0.44006	-0.916745	0.726997	1	630	tags=8%, list=11%, signal=8%	83442/51322/51673/114882/2014/8742/6688/8741/9101/9975/10287/63940/29800/2771/6945/1396/4683/255809/968/1522/22936/7086/665/6948/23406/7940/7305/10010/1471/6281/55959/7150/5199
ZGLP1	134	-0.429222	-0.862506	0.732597	1	1127	tags=25%, list=20%, signal=21%	57175/5868/826/6237/27342/945/117144/1540/1105/3663/107984366/6275/4668/56940/10008/100505483/7454/57515/83442/10308/27239/8742/8741/9101/5966/63940/29800/84458/1436/84106/6715/7940/7305/1471
ZNF382	77	0.348393	0.853666	0.735294	1	1451	tags=44%, list=26%, signal=33%	5588/10198/55342/160897/22869/101929147/23301/285349/152185/55120/1479/26751/7705/26263/84083/11128/57496/25929/7675/10240/56339/51434/5378/57147/51134/57534/101060200/4436/84503/7743/65250/26275/5921/80184
FOXN3	31	-0.452941	-0.816077	0.738035	1	2368	tags=48%, list=42%, signal=28%	149076/100507290/3297/55069/64839/57190/80790/3916/2782/1455/5062/7392/80727/9612/10801
DRAP1	219	0.342114	0.93087	0.738095	1	495	tags=11%, list=9%, signal=11%	10870/402/4282/4833/6205/6176/7311/84326/199990/4831/284184/6155/6158/8673/55352/29937/57819/80097/6723/517/11007/401115/1072/6141/653784
ZNF587	245	-0.430634	-0.88259	0.738414	1	401	tags=3%, list=7%, signal=3%	100128537/7402/2124/10577/25798/283131/2207
ZNF691	192	0.353023	0.941452	0.740741	1	1276	tags=41%, list=23%, signal=32%	402/6182/79077/2193/7374/8607/84300/51154/4507/8673/84284/55695/51258/28958/8655/84937/29902/8479/471/65993/55152/113655/55847/1019/26284/64110/5693/101929147/65094/54903/84939/2618/8568/80227/10061/1312/29920/8815/55110/326625/1479/7157/54496/100129858/26995/9277/10856/55813/51023/60386/401207/10528/245812/90861/124454/7753/10598/5188/10101/60526/90529/79149/5436/55319/55011/6634/5437/64949/3703…
NFATC2	53	0.357352	0.832527	0.740964	1	605	tags=15%, list=11%, signal=14%	5588/55225/9767/4637/5311/197358/489/22869
ZNF674	162	0.3342	0.901862	0.741379	1	1285	tags=34%, list=23%, signal=27%	6181/3159/6142/7311/54865/4507/10198/254013/57181/283104/101929147/84140/55759/3181/100129387/64794/84939/375248/2618/161779/23301/285349/152185/55120/10325/55835/672/55556/26751/253769/100287765/55813/26263/84083/145508/11128/25929/7006/11232/84914/60526/56339/51434/84942/5378/100506815/27085/400506/51134/55755/91749/55063/84064/101060200/29966
MSANTD3	152	-0.426325	-0.855038	0.746509	1	643	tags=12%, list=12%, signal=11%	10725/57085/27125/267/400569/51100/51343/1453/9051/10287/80273/10326/4790/152007/5971/10261/388325/1508
ZNF813	184	0.33415	0.935825	0.75	1	1483	tags=45%, list=27%, signal=34%	9767/10198/7561/9793/83990/55342/160897/5471/7733/51018/113174/22869/81856/64395/79598/65062/25926/55127/23301/7029/285349/25888/11168/339324/163050/163087/57489/342892/27340/54465/1653/7705/55728/84083/10314/81931/23270/11128/56898/90338/57496/10146/25929/7675/51430/90407/84914/7247/64921/51434/51427/23076/284391/56061/8518/84172/1763/55755/284309/162655/57534/4436/23173/10795/23279/283209/23318…
ZNF562	357	0.246015	0.740759	0.75052	1	429	tags=6%, list=8%, signal=6%	3945/6218/11224/100507303/3159/3070/6633/10591/746/90480/9349/6659/6147/27089/400986/6164/378708/521/6632/80127/221468/516/55651
KLF1	17	-0.466315	-0.791726	0.752732	1	1467	tags=35%, list=26%, signal=26%	8850/259230/116151/51312/10098/645
FOXP4	38	-0.44199	-0.807374	0.755332	1	1277	tags=26%, list=23%, signal=20%	6874/5720/1455/7392/29998/4629/1209/7016/80758/114769
POLE3	57	0.345931	0.833518	0.756944	1	1612	tags=37%, list=29%, signal=26%	3146/283489/7733/25926/54465/142940/10733/10314/7247/134266/116461/10424/203547/200933/127253/5716/11335/133619/5931/440145/5930
ZFP14	178	0.329391	0.900717	0.758065	1	1423	tags=38%, list=25%, signal=29%	286467/10198/9793/160897/1072/80321/57181/137682/28981/22869/81856/64395/23468/440515/100129387/134637/7029/285349/152185/55120/339324/55835/163087/57489/1479/80173/55726/26751/100287765/7570/7705/64417/26263/55728/84083/11128/56898/57496/10146/25929/11232/7675/84914/10240/84899/56339/10585/51434/84942/57147/51134/55755/162655/101060200/29966/4436/23173/23279/23318/9657/26013/7743/55326/150759/11…
ZBTB46	10	-0.481482	-0.770373	0.76	1	202	tags=40%, list=4%, signal=39%	51744/23030/85414/57222
MXD4	33	-0.441702	-0.805235	0.760897	1	2579	tags=61%, list=46%, signal=33%	91833/155435/55665/55716/57602/23774/85406/100505573/4943/79594/10121/130074/9870/79786/118813/57617/5609/51621/267/1453
ZBTB49	87	-0.434717	-0.842224	0.769841	1	1370	tags=21%, list=25%, signal=16%	142891/23670/8446/10087/118813/27342/1540/5894/147179/154881/79660/6249/9101/84458/6574/5770/6867/221178
ZNF177	173	0.335105	0.918509	0.770492	1	1316	tags=45%, list=24%, signal=35%	65008/84319/54865/64105/286467/10198/79723/4331/113802/55342/160897/29902/80321/57181/54517/28981/23421/58477/594/79649/101929147/23468/84140/54903/64794/84939/10455/2618/23301/285349/25888/152185/55120/10325/55843/55835/55110/55622/1479/23635/80173/7157/26751/54496/100129858/5832/51474/7705/26263/84083/401207/11128/57496/10528/25929/7675/7753/60526/10240/84899/56339/51626/90529/51434/5378/55319/…
PWWP2B	194	-0.42691	-0.861956	0.77577	1	1502	tags=27%, list=27%, signal=20%	23616/84247/124997/10250/4125/1455/4055/3631/3340/11078/7297/57140/256364/2011/81622/826/80727/9909/23526/200014/7084/3663/1445/50640/5330/55911/830/4627/10844/1774/219931/257106/2870/2137/3705/116985/151742/6778/23654/7320/141/254102/2771/2316/7094/9679/5500/8514/55701/1522/64005/79026
TAL1	13	-0.448547	-0.755669	0.777624	1	1754	tags=62%, list=31%, signal=42%	9693/55437/1182/205428/259230/116151/65125/10098
ZNF687	288	-0.421906	-0.873477	0.780062	1	1219	tags=22%, list=22%, signal=18%	55700/8408/23787/57617/5609/23258/200014/5252/79155/5894/51621/170954/267/91/9766/119392/6533/401548/90268/2889/119504/10318/4627/137964/6016/10844/127829/1408/7030/51343/5914/4650/5878/1453/8897/114789/6451/5045/375035/54434/60685/23315/128866/90427/55646/9267/3720/2355/10200/752/8178/55625/1912/79585/84957/5770/4215/5339/9846/2683/8303/4791/56882/6452
ZNF428	165	-0.427227	-0.859726	0.781996	1	761	tags=11%, list=14%, signal=10%	8887/119392/830/11342/10844/285381/6643/23471/7320/203228/5500/476/137886/3459/57222/10010/5788/427
ZNF256	186	-0.415145	-0.849971	0.782422	1	1159	tags=16%, list=21%, signal=13%	64860/26959/10725/57085/1540/1105/27125/2548/6275/26469/11006/7454/8774/64218/5495/9451/8742/8741/5966/10094/2209/10287/169200/83937/128346/968/11027/6277/7940/7305
TSHZ1	16	-0.442343	-0.747696	0.783099	1	2366	tags=50%, list=42%, signal=29%	10513/9527/10228/29123/6400/8019/100505641/4155
AHR	73	-0.42303	-0.807753	0.786848	1	770	tags=12%, list=14%, signal=11%	571/3267/160760/10672/64857/55122/56261/79627/7321
TFDP1	83	-0.423568	-0.813945	0.787089	1	374	tags=10%, list=7%, signal=9%	10098/51230/122416/645/80762/9645/221895/948
ZNF782	184	0.329182	0.930238	0.788732	1	1584	tags=43%, list=28%, signal=32%	9767/4507/10198/9793/83990/5311/6894/160897/197358/166647/9735/22869/79598/1021/64794/23301/26354/285349/25888/152185/55120/27130/55835/1479/27340/26751/253769/64434/7705/26263/84083/145508/11128/57496/25929/7753/84914/84899/64921/51434/27085/57147/8518/84172/1763/51134/64770/55755/91749/162655/57534/101060200/4436/23279/26013/7743/8672/6426/150759/349075/80267/5591/56916/65250/6599/154007/5921/2…
TIGD1	83	0.333994	0.822047	0.792308	1	1283	tags=31%, list=23%, signal=24%	10198/28981/101929147/100129387/134637/375248/2618/161779/80227/10325/80173/26751/7570/64417/26263/11128/10146/11232/7675/56339/10585/84942/51134/6742/9933/101060200
MEF2C	10	0.383337	0.719456	0.793413	1	344	tags=10%, list=6%, signal=9%	8835
TSPYL1	263	-0.416847	-0.857634	0.79375	1	700	tags=9%, list=13%, signal=8%	6892/115727/7320/140885/51228/23528/6688/10094/63940/2771/6945/84458/6715/7408/4193/6430/5566/23406/54964/25946/25798/9445/2907
ZNF629	252	-0.423226	-0.86382	0.794209	1	1518	tags=24%, list=27%, signal=18%	3801/1314/867/80271/5089/1455/9619/26524/23053/6455/56270/64928/51643/118813/5970/285550/6464/9320/1743/8408/23787/57617/11057/23258/200014/10725/5252/5048/6811/5894/222658/267/55810/91/401548/119504/10318/83931/27245/137964/7030/51343/4650/5170/10106/1453/8897/6451/5045/54434/8844/60685/90427/55967/80273/3720/752/1912/8202/9846/114769
ZSCAN16	56	-0.409503	-0.774642	0.794438	1	2171	tags=43%, list=39%, signal=26%	57563/6729/23637/54834/54851/23041/2073/115294/23161/9950/6814/23325/55599/51131/23075/9648/51185/6733/23438/3454/11342/9765/5663/51230
ZNF165	36	-0.428558	-0.774675	0.798246	1	1413	tags=28%, list=25%, signal=21%	160/57140/826/58515/26469/7454/27163/7320/2771/23406
ZNF552	155	-0.414083	-0.831486	0.800647	1	1476	tags=19%, list=26%, signal=14%	80830/143384/29115/100874272/9159/10658/10087/118813/100506860/23177/1743/4629/7786/57169/23438/64397/9766/55281/8837/7439/27166/79660/375035/91544/23528/11214/6397/54964/283131
FOXO3	149	-0.407722	-0.820075	0.801715	1	1144	tags=23%, list=20%, signal=19%	26959/84301/945/5894/1105/27125/50640/57169/79065/23608/1387/80853/23130/5495/154881/9451/571/8897/8780/2308/388403/51696/255394/80315/5966/10672/9958/7048/56261/6867/3091/6397/665/84981/7150
CBX2	33	-0.410812	-0.744946	0.805063	1	202	tags=9%, list=4%, signal=9%	1612/57222/3958
TCF3	145	0.31981	0.860391	0.805195	1	596	tags=12%, list=11%, signal=11%	9315/6666/4171/4602/133308/7915/283489/6723/23170/708/4796/8704/8831/489/3418/23598/50512/79711
PCGF6	346	0.309834	0.925503	0.809011	1	1334	tags=25%, list=24%, signal=20%	5567/79682/1111/64116/3146/79915/79075/5427/4175/9767/283489/10198/10635/9793/7272/83990/160897/7738/5471/7733/51018/990/151246/113174/11169/22869/64395/79598/23594/23234/65062/3998/25926/26354/26135/11168/339324/64151/163087/9928/10556/5955/55726/1964/54465/699/142940/1653/7705/10733/64417/55728/10314/81931/56898/50808/27248/10240/28977/7247/134266/64921/51427/57082/22995/648/116461/10424/3066/5…
TSPYL2	224	-0.408768	-0.83644	0.809917	1	1217	tags=19%, list=22%, signal=15%	27342/79939/10095/26959/10725/945/64747/5252/1540/51119/5894/158830/1105/27125/6275/4668/57169/26469/10008/7454/2117/8774/64218/5495/154881/94056/9451/1453/51324/8742/8741/5966/10094/10287/4790/3720/1200/6867/6430/6397/6404/7150
ARID5B	36	-0.424613	-0.76711	0.812655	1	1456	tags=28%, list=26%, signal=21%	143384/283635/23075/23014/256987/51185/5527/26286/7320/84458
ZNF586	326	-0.41307	-0.855328	0.815306	1	1471	tags=18%, list=26%, signal=14%	58533/400916/143384/5223/142891/51362/4055/80219/133746/23451/8446/9648/124491/81622/167153/5868/826/167227/64860/117144/1540/51119/1105/51185/151056/23096/6275/50640/8887/100505483/11006/7454/92799/2117/57515/51526/8774/5495/27166/8780/23528/8742/6688/8741/5966/63940/6945/84458/1200/5500/150864/6813/6430/128346/968/665/7940/7305/1471
MAFG	169	-0.411055	-0.827999	0.816826	1	1216	tags=20%, list=22%, signal=16%	8408/23787/23258/9583/26959/5252/5894/51621/57169/10475/9766/6533/401548/256356/90268/6016/1408/51343/1453/8897/23315/90427/55454/9267/3720/8878/10043/55625/2055/84957/6867/19/8303/56882
SETDB2	276	0.302402	0.884782	0.818182	1	1487	tags=34%, list=27%, signal=26%	5336/5567/4602/65008/9331/135293/4175/4507/10198/55342/6894/160897/29902/10606/9735/54517/22869/79598/79649/84140/143888/1021/64794/3998/23301/26354/26135/7514/152185/27130/10325/55843/672/55622/1479/7157/26751/5558/253769/401397/51474/7705/55813/145508/57496/9875/25929/90861/7753/50808/60526/10240/84899/2967/51626/64921/54919/5378/57147/55132/8518/51134/64770/91749/7023/6293/84064/57534/4436/232…
ZNF346	157	-0.40474	-0.820056	0.818378	1	556	tags=6%, list=10%, signal=6%	63940/55508/8462/55122/6715/2124/23406/7321/25798/6281
ARID5A	254	-0.41333	-0.843145	0.821946	1	1144	tags=21%, list=20%, signal=17%	26959/10725/64747/5252/23308/5894/27125/51621/267/55810/57169/51100/57471/51411/1387/119504/10318/6714/7030/51343/5914/5495/1453/8897/51322/51762/4780/5045/51696/54434/23315/79567/90427/10672/10019/9267/4790/3720/2355/3656/7048/752/8178/23268/5770/9846/51429/51274/5971/2683/4791/602/23135
ZNF284	97	0.328158	0.822743	0.822581	1	1451	tags=41%, list=26%, signal=31%	286467/10198/160897/28981/101929147/23468/84140/10455/2618/80227/23301/285349/152185/55120/10325/55835/1479/80173/26751/11128/57496/10528/11232/7675/60526/10240/56339/10585/5378/400506/51134/84064/101060200/29966/4436/101927597/27229/26275/101927027/80184
WDR82	141	-0.406636	-0.812557	0.822882	1	1380	tags=16%, list=25%, signal=13%	10658/11021/118813/1743/26523/57617/7786/51621/267/23438/9766/55281/9489/6016/10844/7439/1453/375035/3720/5770/6397/54964/56882
ACTR2	151	-0.407931	-0.81962	0.824236	1	1625	tags=28%, list=29%, signal=20%	821/143/50809/3936/51703/51652/9950/5934/10487/60682/9317/50862/23048/51643/10955/81609/10159/11311/51167/201799/27071/64747/53840/3454/28962/5899/11342/4155/63901/10673/6643/7813/6451/8826/7172/10200/120/5728/5538/137886/834/9750
ZNF76	348	0.323494	0.970332	0.826913	1	1466	tags=49%, list=26%, signal=38%	10220/5588/6300/2193/54865/7374/3182/4172/8607/51154/286467/4507/1663/51768/10785/84284/349565/64798/2189/142/23170/4796/197358/84937/29902/5575/25886/166647/118980/8479/471/54517/7108/7866/54058/55152/113655/399687/594/10514/101929147/84140/65094/54903/3181/64794/80233/84939/55764/2618/8568/6621/80227/23301/10061/55750/152185/55120/29920/10325/8924/201255/672/8502/55556/55622/326625/1479/151313/…
ZNF449	255	-0.407314	-0.841884	0.827479	1	1692	tags=26%, list=30%, signal=19%	57589/23161/51135/55717/5586/9213/6655/153241/8867/8674/122525/29945/5828/9950/6670/100505641/6814/153339/23325/79572/10114/58533/11215/9847/2631/23451/9648/29066/23405/167153/9320/140609/9583/5965/23473/10499/50618/51014/51100/9991/6093/55914/4238/54790/4179/5412/57515/5937/9765/2182/23527/571/3267/114882/84888/9101/203228/55788/23064/5782/9444/56261/4683/3516/8301/23433/5788
PARP2	294	-0.413205	-0.848496	0.828893	1	610	tags=4%, list=11%, signal=4%	6688/9101/10287/63940/3689/6430/255809/11027/6277/7305/29992/2207
ELK3	29	-0.415288	-0.728016	0.831234	1	2631	tags=59%, list=47%, signal=31%	5601/6197/23054/8939/6683/9989/84910/55069/8943/9813/201627/23476/57178/100505641/1519/51014/196527
REXO4	348	-0.419693	-0.863094	0.831804	1	417	tags=7%, list=7%, signal=7%	10043/284129/114294/9034/10018/51274/3459/57222/2683/7321/9960/2495/7378/25798/8676/1604/3460/58191/84981/602/3587/64581/4814
ACTR6	339	0.213189	0.632375	0.832889	1	1290	tags=24%, list=23%, signal=20%	5567/65008/3146/9521/4085/64105/79915/6428/10198/4331/6632/160897/5471/5984/51018/80321/55916/112942/7979/151246/113174/28981/54951/11169/54069/23421/64395/79649/51602/3998/25926/10455/55120/11168/6613/339324/7443/55843/11198/163087/57489/84259/1479/10556/80173/55726/1964/54465/142940/1653/7570/7705/64417/55728/10314/81931/56898/10146/7675/50808/57587/10240/28977/7247/51626/132/5378/84154/116461/…
THAP4	33	0.319834	0.694392	0.833333	1	90	tags=3%, list=2%, signal=3%	3159
ERG	77	0.324187	0.794898	0.834356	1	1494	tags=56%, list=27%, signal=41%	5588/9331/9767/55342/5311/160897/10389/166647/1021/375449/64794/23301/7029/285349/27130/55752/23236/1479/23635/55726/7705/636/84083/81931/57496/25929/7753/84899/7171/51701/57147/22955/57534/4436/79828/613/27316/65250/6599/22862/54497/9202/57189
NAIF1	100	-0.407911	-0.797409	0.836667	1	1796	tags=33%, list=32%, signal=23%	1186/3916/55113/8761/22821/55048/5253/25777/93624/84247/124997/22879/1455/3654/57140/256364/7392/24149/80727/57617/88455/23526/1209/80305/4335/2889/23338/5170/7016/2137/3705/9679/55625
ZKSCAN3	254	0.328566	0.928418	0.83871	1	1307	tags=34%, list=23%, signal=27%	5336/4602/2193/7374/8607/135293/7915/4507/51768/64798/23170/2288/4796/8655/29902/471/7108/113655/399687/10514/101929147/54903/3181/64794/80233/84939/79724/2618/8568/6621/6487/23301/10061/57521/152185/27130/29920/55752/8924/201255/672/115950/8502/1479/7157/26751/54496/29985/253769/5832/9277/53615/7343/51474/2068/55813/11128/9875/25929/90861/124454/7753/10598/5188/60526/9894/54919/79149/5378/57147/…
ZNF510	405	0.285638	0.854717	0.839459	1	1234	tags=18%, list=22%, signal=15%	11224/5567/4602/6748/64116/746/6421/9767/283489/10198/4637/521/9793/6209/517/83990/5311/6894/160897/10169/140823/7733/514/7468/79598/1021/25926/1175/55127/6621/51079/57539/26354/6631/23132/25888/7514/152185/27130/339324/163087/342892/27340/5955/54465/5558/7705/10733/10314/81931/90338/57496/513/25929/7753/50808/92595/84899/26230/51626/64921/51427/706/57684/144245/57147/55132/8518/55345/1122/1763/6…
ZNF222	232	-0.407172	-0.83418	0.840168	1	780	tags=6%, list=14%, signal=5%	9451/571/65983/8742/8741/10287/6945/152007/3689/7940/7305/6404/1508/5199
PHF20	250	-0.399732	-0.821641	0.843523	1	994	tags=10%, list=18%, signal=9%	23438/8887/64397/7454/9208/2117/5527/5611/94056/79670/27166/6892/26286/7320/6249/9101/63940/2771/84458/55508/5500/11214/54964/6993/114769/330
PLAGL1	74	-0.392577	-0.759349	0.849598	1	16	tags=4%, list=0%, signal=4%	1612/9114/3958
SCMH1	83	-0.392357	-0.752927	0.850457	1	202	tags=4%, list=4%, signal=4%	1612/57222/3958
E2F4	93	0.313989	0.795036	0.850877	1	859	tags=18%, list=15%, signal=16%	4171/4605/10024/1017/10376/92745/23170/4796/2305/7468/284403/6621/29901/29920/9401/115950/55071
EPC1	230	-0.40136	-0.819085	0.855057	1	1738	tags=22%, list=31%, signal=16%	6884/101927275/1075/22919/148423/7716/3839/8915/9728/324/51128/27351/9541/10250/221/4055/80219/23670/133746/8446/9218/23014/124491/81622/5868/22890/1540/51119/10209/1105/51185/27125/3663/1445/50640/10008/51526/8774/64218/23471/23528/8742/6688/8741/4542/3055/6945/84458/150864/6430/6404
ZNF652	123	-0.389016	-0.772919	0.855104	1	2548	tags=55%, list=46%, signal=31%	9897/9736/27291/91452/103/374986/9815/55291/23122/64324/57551/10513/55727/23131/8916/253959/51592/158358/84910/23339/57563/23637/23041/2074/9962/9813/2073/54520/6400/201627/51780/9665/57645/23033/285512/23272/8648/8816/23161/54878/51135/66036/143/153241/324/9950/100505641/4204/11215/9847/54882/23405/9320/88455/51199/23473/10499/10746/401548/55914/4238/4155/23527/5170/5663/10507/6249/23064
ZNF772	321	-0.406422	-0.839575	0.855533	1	267	tags=3%, list=5%, signal=3%	1396/169200/968/6277/7940/7305/6282/5199/2207
ZNF408	170	-0.394826	-0.793026	0.855603	1	1396	tags=20%, list=25%, signal=15%	26524/7994/6455/56270/51643/125150/5970/81609/285550/200186/1389/55700/57617/64747/137835/57085/51621/267/9766/10008/119504/1408/51343/10106/1453/160760/5045/10019/4790/5770/7100/834/5971/114769
ZNF250	90	-0.388573	-0.757964	0.857961	1	473	tags=11%, list=8%, signal=10%	400569/114826/91526/85007/60490/55508/55122/51274/54964/9445
RUNX1	23	0.328696	0.668322	0.863281	1	177	tags=4%, list=3%, signal=4%	6624
ZNF91	139	-0.391716	-0.78237	0.864333	1	610	tags=9%, list=11%, signal=8%	27166/6688/63940/1200/79180/920/5728/968/23406/6277/7305/1471
SIRT3	129	-0.39293	-0.777057	0.865427	1	188	tags=4%, list=3%, signal=4%	55122/23406/7321/25798/8676
ZNF480	281	0.315252	0.885955	0.866285	1	1334	tags=28%, list=24%, signal=23%	5567/65008/64116/3146/9767/283489/10198/9793/83990/55342/160897/7738/5471/7733/51018/151246/113174/11169/22869/64395/79598/79649/1021/65062/3998/25926/26354/25888/7514/11168/339324/163087/57489/27340/5955/1964/54465/699/142940/1653/7570/7705/10733/64417/55728/10314/81931/56898/90338/57496/10146/50808/10240/28977/7247/51626/64921/51427/116461/3066/55132/84172/55345/1763/64770/284309/162655/57534/4…
ZRANB3	291	0.32171	0.928863	0.866667	1	1144	tags=47%, list=20%, signal=40%	3945/3326/55536/65008/28969/84319/5588/3329/54865/4869/4678/4172/81691/55225/135293/7915/79075/5427/4175/286467/4507/10198/3320/51768/728591/79723/9793/6632/142/55215/55342/220988/6894/160897/10576/8706/5471/29902/166647/10606/51018/80321/118980/85444/1736/9735/57181/3608/54517/137682/151246/113174/4691/28981/11169/23421/58477/283742/594/79649/101929147/23468/84140/55759/1021/55329/3181/65062/647…
UBTF	274	0.301806	0.880894	0.866667	1	1059	tags=25%, list=19%, signal=21%	5336/6666/4171/9781/6300/4678/6941/3182/8607/7915/4507/1663/10785/1953/2189/142/23170/4001/4796/6894/64098/489/23598/7108/79711/113655/9415/399687/7468/10514/10471/64794/80233/84939/79724/1786/55764/8568/6621/90956/57521/29901/29920/9401/8924/201255/115950/116840/2194/54496/23065/29985/253769/10155/26995/64434/9277/23178/53615/2068/3978/26094/1174/9875/25929/90861/124454/7753/10598
PHF13	27	-0.381183	-0.676815	0.869333	1	2221	tags=63%, list=40%, signal=38%	29855/7159/51061/84444/342371/22992/9819/7109/130074/23207/90007/9903/51621/267/1408/51343/5045
DNMT3A	119	0.314449	0.839361	0.869565	1	1307	tags=56%, list=23%, signal=44%	55536/5588/2193/133308/7915/4507/51768/1953/64798/142/55342/84937/29902/166647/7108/4691/399687/10514/101929147/84140/1021/64794/84939/2618/8568/23301/55752/10325/8924/63910/54914/7157/26751/93185/54496/253769/26995/5832/9277/7343/636/26094/84083/11128/57496/9875/10528/25929/90861/124454/7753/5188/60526/84899/51434/23076/2639/64210/326624/400506/622/7064/6693/101060200/2788/661/79828
ZNF616	77	0.308021	0.755049	0.872	1	1579	tags=42%, list=28%, signal=30%	160897/11169/22869/64794/26354/25888/152185/1479/699/7705/81931/11128/25929/90861/7753/10240/57147/8518/1763/91749/57534/4436/7743/6426/80267/65250/5921/3295/9202/7155/26512/9678
CREBBP	454	-0.412213	-0.857607	0.873367	1	1217	tags=19%, list=22%, signal=17%	27342/8408/79939/9748/9107/55233/285966/23258/9583/26959/10725/100505576/23308/1540/29110/5048/23473/5894/22877/1105/10499/8021/27125/79661/55544/50618/5791/55810/57169/79065/9766/10746/51100/57471/6093/90268/147179/80853/57515/23130/55088/51343/5495/23527/154881/7187/9451/3267/1453/8897/51322/114882/51762/4780/2308/51696/54434/23315/6249/9101/5966/10672/54625/55454/9267/23064/3720/84458/3656/995…
ZNF443	268	-0.387959	-0.800582	0.874615	1	635	tags=6%, list=11%, signal=6%	23528/6688/9101/63940/2771/84458/1396/440836/6813/6430/968/23406/6277/7305/1890/1471/6281
FOXP1	356	-0.385195	-0.805323	0.874745	1	1600	tags=22%, list=29%, signal=17%	55692/324/84248/165918/4700/2052/5720/51128/84164/23253/9541/5583/10250/58533/5089/400916/143384/54737/55599/5771/160/977/4055/9550/80219/5018/23670/133746/8446/100130476/57404/23014/9648/124491/81609/100506860/5973/826/58515/80213/221037/51125/27071/26137/132320/54978/51185/8887/64397/91526/830/7454/55969/5527/51526/5611/151556/27166/6892/26286/23654/23471/7320/51230/23528/6688/6249/7074/55967/6…
GTF2B	452	-0.405893	-0.842873	0.876008	1	1553	tags=21%, list=28%, signal=16%	51128/5828/27351/6670/23253/9541/4289/51714/6498/10250/58533/3845/143384/142891/51362/4055/7994/80219/23451/8446/9218/10087/9648/124491/167153/5868/22890/2553/5973/826/27342/9748/9528/9107/55233/221037/167227/2181/26959/1540/51119/29110/1105/51185/27125/3663/50640/5330/8887/10150/51100/10008/6093/830/7454/23479/2117/57515/51526/55088/8774/5495/154881/9451/571/10308/51322/6778/8780/23471/51762/235…
FLYWCH1	68	-0.377532	-0.713282	0.876301	1	1642	tags=37%, list=29%, signal=26%	25981/29990/79147/2580/9924/197258/1186/9138/3551/100289019/54776/3631/7297/23053/256364/57654/9909/23218/200014/55367/5330/11188/79716/4122/8514
ZNF263	442	-0.395465	-0.829538	0.879798	1	438	tags=3%, list=8%, signal=3%	57217/7048/169200/152007/2512/6303/5538/11261/114769/6282/1508/2207/3958
ZNF219	66	-0.365661	-0.695933	0.881455	1	824	tags=20%, list=15%, signal=17%	5089/25994/85414/5970/10159/5252/6811/7030/10106/80273/5187/9846/114769
ZNF530	69	0.308773	0.734938	0.881481	1	1360	tags=29%, list=24%, signal=22%	7561/7733/91283/57343/55659/7693/163050/163087/79744/23270/90338/5194/79088/26230/284309/10795/200933/9329/7564/9668
FOXO4	360	0.22351	0.655448	0.88246	1	591	tags=9%, list=11%, signal=8%	11224/100507303/6748/6633/746/9521/90480/9349/154467/51307/5757/6147/6635/78988/27089/6164/378708/521/23658/1953/6632/105376843/516/55651/1854/10169/140823/489/6185/7979/514/54951
NFE2L2	382	-0.39079	-0.815883	0.882472	1	1096	tags=16%, list=20%, signal=14%	1540/29110/5048/23473/1105/10499/27125/50618/10150/10746/51100/57471/6093/55914/4238/54790/1387/5412/80853/57515/51088/9765/55088/2182/5495/23527/9451/571/3267/1453/10308/51322/5663/114882/51762/84888/51696/23315/6249/9101/5966/10672/5908/55788/55454/23064/4790/5782/9444/3516/6867/8202/8301/51429/22936/23433/3459/10892/10010/5788/64092/7150
GTF2IRD2	60	-0.372329	-0.709462	0.882567	1	673	tags=20%, list=12%, signal=18%	23272/54878/7716/66036/8674/253461/9950/23253/23473/4780/137886/7086
ZNF555	43	-0.374101	-0.686666	0.883544	1	626	tags=12%, list=11%, signal=10%	64860/6275/8742/8741/7305
AHDC1	285	-0.383083	-0.793807	0.886387	1	1423	tags=20%, list=25%, signal=16%	9619/54882/26524/7994/23053/6455/51643/29066/2011/5970/23405/285550/200186/219333/9320/29998/55700/8408/5609/10725/57085/5252/5048/6811/22877/1209/27125/170954/267/55810/51100/10318/23338/7030/51343/5495/4650/7016/10106/1453/51322/5045/51696/54434/8844/60685/79567/90427/55967/80273/57217/1912/8202/5538/9846/2872/114769
ARID3A	137	-0.375264	-0.748789	0.886689	1	854	tags=12%, list=15%, signal=10%	5527/9545/5611/6892/965/7320/9051/91544/55967/55508/9114/637/11261/1438/54964/114769
IRF2	60	-0.361124	-0.688686	0.887456	1	2464	tags=60%, list=44%, signal=34%	8411/528/8992/84272/10015/10228/8405/64429/22900/27236/51061/4802/10559/55217/26578/219402/9095/6619/55252/54838/8417/4905/10890/11212/51510/79901/5062/11311/1389/2313/55858/53840/3454/28962/1408/2710
E2F5	65	-0.373327	-0.702774	0.888628	1	778	tags=9%, list=14%, signal=8%	7439/91544/2771/2124/54964/9445
ZNF605	275	0.302065	0.854669	0.892857	1	1619	tags=41%, list=29%, signal=31%	5567/4602/9331/4507/10198/55342/5311/6894/160897/10576/166647/9735/57181/3187/28981/22869/79598/79649/84140/1021/3998/25926/134637/23301/26354/285349/25888/7514/152185/55120/27130/339324/401251/10325/55843/55835/672/54914/57489/1479/27340/55726/26751/54465/5558/253769/7705/55728/84083/57496/5411/25929/7675/7753/60526/84899/51626/64921/51434/5378/3066/55132/8518/55345/1122/51134/64770/162655/6293/…
SETD3	122	-0.375083	-0.740064	0.893362	1	1769	tags=33%, list=32%, signal=23%	8417/51317/23272/8648/3717/283349/51135/55717/821/143/150465/6874/9950/100505641/51809/867/10114/11215/23250/2987/5925/253430/5062/1389/2313/140609/51199/5594/55858/23396/9926/55852/2746/7385/23196/196527/3716/4126/157/92241
YBX1	24	0.297156	0.635998	0.894515	1	304	tags=8%, list=5%, signal=8%	5757/6636
HMGN3	74	0.312473	0.75851	0.897436	1	697	tags=18%, list=12%, signal=16%	65008/84319/4869/64105/5757/6635/378708/6632/79621/7979/23421/594/10969
GFI1B	16	-0.373438	-0.629222	0.898045	1	1087	tags=31%, list=19%, signal=25%	7052/51312/65125/10098/645
ZFP30	229	-0.379436	-0.774423	0.898446	1	904	tags=12%, list=16%, signal=11%	51185/2548/60436/26469/7454/2117/5527/8774/27163/94056/3705/27166/26286/7320/51230/6688/63940/2771/84458/1200/1390/5500/79180/6813/23406/7305/6993/1471
ZNF496	232	-0.371822	-0.761814	0.899258	1	202	tags=5%, list=4%, signal=5%	8844/9051/3716/55967/80273/1612/57222/114769/6282/1508/3958
MBD5	121	-0.377842	-0.750658	0.900442	1	640	tags=7%, list=11%, signal=6%	91544/55967/80273/9114/79890/54964/114769/1508
MLXIP	133	-0.365357	-0.730964	0.900979	1	1386	tags=29%, list=25%, signal=23%	9990/27069/51780/7109/55593/29058/130074/54870/9842/9870/23207/57589/6392/11044/7994/51643/285550/200186/9903/8408/5609/339487/10725/64747/8021/27125/51621/267/1387/119504/27245/51343/10106/8897/6451/10627/10200/5538/2872
ZNF707	61	-0.372574	-0.693317	0.901163	1	1365	tags=20%, list=24%, signal=15%	11021/118813/57617/200014/7786/90203/23438/9123/9489/10844/7439/123872
ZNF433	73	-0.376381	-0.720779	0.902212	1	180	tags=5%, list=3%, signal=5%	7439/91544/54964/9445
ZBTB18	121	-0.371302	-0.729366	0.905451	1	1103	tags=20%, list=20%, signal=16%	9926/51341/80305/51014/55810/401548/5412/80853/5937/571/3267/51696/10672/9267/9444/7048/752/55625/56261/8202/79627/8301/9922/10892
CUX1	141	0.298605	0.805719	0.905882	1	810	tags=18%, list=15%, signal=16%	129080/9781/56479/5588/9331/158405/55225/9767/56265/1953/8831/197358/10169/489/166647/26086/23598/399687/7468/1021/6621/57521/84747/27130/57605
XBP1	141	0.311719	0.832023	0.905882	1	367	tags=8%, list=7%, signal=7%	6218/6224/3921/125144/6229/84650/9349/6147/811/400986/6130
ZNF771	291	0.306632	0.865771	0.90625	1	1072	tags=30%, list=19%, signal=26%	66005/79022/4830/51659/79077/10591/5425/2193/5037/54865/26517/10436/494514/84153/8607/84300/25911/29893/51154/10785/84284/79622/51258/28958/516/55651/2237/57418/122509/84296/147841/5575/4521/8479/7866/1937/55152/60509/58477/101929147/751071/55759/65094/10969/51181/84939/51021/2618/8568/51079/80227/10061/51491/1312/5860/10998/5032/4723/55556/326625/10963/151313/100132774/23640/100506649/54496/2306…
TIGD2	115	0.301393	0.788711	0.906977	1	1619	tags=39%, list=29%, signal=28%	5567/9767/160897/7733/92935/22869/3150/79598/143888/3998/26354/128/7514/5955/54465/5558/142940/7705/10314/50808/51626/64921/116461/144245/8518/1122/57534/127253/22903/4076/10128/56916/154007/54497/340481/9202/11335/7155/51692/9678/54585/11073/27336/116064/8725
JARID2	487	-0.393651	-0.821068	0.907723	1	1217	tags=19%, list=22%, signal=16%	27342/8408/79939/23787/10095/9107/23258/9583/26959/10725/23308/1540/29110/5048/5894/1105/27125/51621/50618/267/57169/91/26469/9766/10746/51100/57471/6533/401548/51411/6093/90268/1387/119504/10318/137964/2117/6016/57515/8774/51343/5495/154881/7187/9451/3267/1453/8897/160760/51322/79660/51762/490/51696/375035/54434/51324/23315/23603/23533/9101/5966/10287/90427/10672/55454/9267/23064/4790/2355/3656/…
ZNF609	89	-0.364716	-0.70257	0.908881	1	1403	tags=20%, list=25%, signal=15%	3631/9731/85414/5062/9909/2313/57446/57326/22864/55858/23396/5330/93129/4261/6778/1612/92241/57222
ZNF146	260	0.309386	0.87065	0.909091	1	1300	tags=31%, list=23%, signal=25%	5567/64116/9767/10198/79723/9793/55342/160897/10576/7738/5471/7733/51018/80321/57181/151246/28981/11169/22869/81856/64395/79649/3998/23301/26354/285349/25888/7514/152185/55120/11168/339324/55835/11198/163087/57489/1479/80173/55726/699/142940/100287765/51474/1653/64417/26263/55728/84083/10314/81931/11128/56898/90338/57496/10146/25929/7675/7753/10240/28977/2967/51626/64921/51434/5378/57147/3066/551…
ZNF571	329	-0.380836	-0.790257	0.914721	1	1159	tags=12%, list=21%, signal=10%	64860/26959/226/10725/117144/57085/1540/5048/23473/1105/27125/60436/6275/4668/10150/11006/2117/57515/8774/5495/9451/51322/51762/4780/8742/6688/8741/5966/10094/10287/1396/1390/968/23406/6277/7940/7305/1471/5199
ZNF563	160	-0.366812	-0.735459	0.915598	1	30	tags=11%, list=1%, signal=12%	100130476/57404/23014/9648/388753/826/58515/80213/51125/3965/8887/7454/5527/151556/7320/6688/2771/330
KDM1B	93	0.29938	0.74304	0.918182	1	403	tags=9%, list=7%, signal=8%	5336/11224/6223/6136/6208/6164/23170/6209
JRK	33	-0.345182	-0.633693	0.919699	1	2089	tags=27%, list=37%, signal=17%	25981/29990/9725/2580/10068/7156/7786/2101/100128537
ZNF17	305	0.178405	0.511705	0.921901	1	1410	tags=29%, list=25%, signal=23%	5567/6748/64116/9767/10198/79723/9793/7486/83990/5311/160897/1072/7733/51018/57181/11169/22869/81856/79598/57343/7158/25926/55659/55127/23301/7693/7029/26354/285349/25888/7514/152185/339324/163050/55835/163087/79744/57489/342892/27340/55726/54465/1653/7705/55728/10314/81931/11128/56898/90338/57496/10146/25929/7675/7753/79088/92595/84914/64921/706/284391/27085/57684/57147/8518/84172/55345/1763/284…
ZNF585A	194	0.302834	0.856897	0.926829	1	1493	tags=44%, list=27%, signal=34%	9521/64105/6635/6164/4331/6632/79921/28958/160897/5471/5984/29902/80321/7979/28981/54069/81856/23421/23468/84140/10455/2618/196294/80227/285349/55120/6613/7443/51065/55110/1479/10556/23635/132299/80173/100287765/1653/7570/7705/64417/51023/57730/26263/401207/56898/28986/10528/81892/7675/10240/728568/100505616/90529/131118/5378/84154/55319/400506/51134/51184/6742/8487/81688/162655/84064/8803/4436/4…
E2F3	274	-0.365557	-0.752131	0.927105	1	1459	tags=17%, list=26%, signal=13%	400916/143384/29115/142891/221/51362/10658/80219/8446/10087/23075/9648/118813/124491/5868/2553/79939/9748/117144/1540/1105/51185/4668/26469/100505483/6093/7454/2117/8774/5495/27166/79660/26286/23528/8742/54918/9101/5966/63940/3720/84458/5500/128346/23406/7940/7305/1471
ZNF181	68	-0.338284	-0.650878	0.928904	1	136	tags=9%, list=2%, signal=9%	84449/79810/55692/54737/57404/25798
TFEC	25	0.288309	0.602119	0.929577	1	3982	tags=100%, list=71%, signal=29%	9735/152185/64770/54497/340481/9202/58487/58486/139818/4144/889/8439/4534/54431/9204/10521/151613/727/84910/280/202309/55252/79663/3717/29945
MTERF3	204	0.308544	0.858289	0.930233	1	1513	tags=35%, list=27%, signal=26%	65008/3146/9521/64105/79915/6428/10198/91298/4331/6632/5471/5984/7979/151246/113174/64395/79649/51602/25926/10455/55120/11168/7443/11198/57489/10556/80173/55726/1653/7570/64417/79101/56898/10146/10240/28977/100505616/131118/5378/27101/84154/55132/51184/6742/8487/9933/10592/162655/580/8803/4436/23173/9657/10915/138199/5393/2187/80184/51002/8883/26019/64710/63931/29093/10283/85437/55010/29087/6741/…
KAT2B	179	-0.360023	-0.730273	0.931842	1	407	tags=4%, list=7%, signal=4%	56261/645/8301/9645/221895/7150/948
TIGD7	63	-0.343267	-0.647186	0.931956	1	1132	tags=13%, list=20%, signal=10%	91860/7786/114826/85007/7439/91544/2124/54964
ZNF324	59	-0.350549	-0.658394	0.933649	1	1122	tags=15%, list=20%, signal=12%	7786/90203/85007/6793/9489/7439/91544/54964/9445
ZNF699	318	-0.364062	-0.753576	0.933741	1	1763	tags=27%, list=32%, signal=20%	56990/130074/27436/6884/101927275/55773/9870/8816/164/7716/57403/64061/8702/9728/373156/324/84248/79786/51128/27351/26190/79691/23253/9541/55041/4289/63916/3845/143384/142891/51362/7994/23670/7046/10087/23075/118813/5868/253832/2553/27342/79939/9748/285966/9583/26959/10725/1540/5894/158830/1105/27125/57169/26469/9766/10746/57471/6093/1387/7454/2117/57515/1408/8774/5495/154881/9451/1453/79660/5176…
ZNF780B	162	0.294791	0.782172	0.934211	1	1483	tags=44%, list=27%, signal=33%	4507/10198/55342/5311/160897/29902/9735/28981/22869/101929147/84140/64794/84939/2618/23301/285349/152185/55120/27130/10325/55835/672/1479/26751/54496/253769/7705/26263/84083/145508/11128/57496/25929/90861/11232/7753/60526/84899/56339/51434/5378/57147/8518/51134/64770/91749/162655/84064/57534/101060200/4436/254042/23279/79828/26013/7743/8672/6426/150759/64582/80267/1161/65250/26275/5921/3295/10192…
HDAC5	110	-0.344222	-0.680663	0.935841	1	1707	tags=25%, list=31%, signal=17%	9842/6392/9138/51564/4700/5089/54776/9550/23053/256364/5970/1743/10159/55700/5609/23218/5252/6811/4627/27113/11188/7030/4650/10106/965/55967/497661
ZSCAN31	59	0.291525	0.673451	0.93662	1	1283	tags=47%, list=23%, signal=37%	2193/286467/254013/55152/58477/101929147/751071/100129387/84939/2618/161779/80227/55120/100132774/26263/11128/10528/11232/257169/56339/10585/84942/80755/400506/51134/121642/55063/101060200
PREB	355	-0.369562	-0.773579	0.938508	1	1145	tags=18%, list=21%, signal=15%	55367/79650/945/79767/64747/10209/113/246330/1105/84905/3663/2548/1445/4668/55852/5330/26469/10008/57192/11006/7454/23196/92799/9961/51526/25939/154881/257106/6256/3705/116985/2101/10553/6778/8780/141/51324/1201/8742/340527/8741/7942/2209/10287/4542/3055/2760/7094/6945/27036/9958/5500/920/6813/83937/11024/128346/55701/3091/89790/221472/6404/2799/131870
MYBL1	19	0.272907	0.576356	0.940959	1	4066	tags=100%, list=73%, signal=27%	64395/138199/80267/80184/84131/2597/10943/545/23032/472/151613/54462/8886/158358/59338/23272/153241/29945/5934
ZNF780A	50	-0.340732	-0.628709	0.941805	1	2225	tags=46%, list=40%, signal=28%	57551/58500/158358/81847/54834/9895/18/23041/84078/2074/100506215/6619/79663/285512/23272/80208/143/105378580/201799/132320/91526/9765/7813
ZNF232	303	0.341405	0.982257	0.942555	1	785	tags=19%, list=14%, signal=17%	79022/4830/11224/100507303/51659/6633/10591/746/5037/54865/26517/90480/10436/9349/6659/6147/84300/25911/6635/51690/100131187/27089/400986/6164/378708/84284/521/79622/6632/79921/28958/516/55651/83982/10169/84296/113246/8479/254013/55152/60509/54069/55847/58477/6152/751071/65094/100129387/10969/51181/375248/51021/51079/80227/51491/1312/5438
CREB3L4	315	0.313242	0.92325	0.944174	1	965	tags=36%, list=17%, signal=31%	9315/129080/6666/3326/4171/4602/10220/55536/3615/28969/56953/23209/8501/5588/6300/2193/4678/7374/3182/5902/8607/133308/81691/135293/7915/2091/51154/4507/51768/328/10785/1953/64798/2189/142/23170/708/2288/4796/57418/8655/8831/29902/5575/489/25886/3418/166647/10606/118980/471/54517/7108/79711/113655/9415/4357/54836/399687/1019/26284/83596/5693/594/10514/101929147/10471/54903/64794/80233/84939/79724…
CHMP1B	43	0.293477	0.670546	0.944724	1	1212	tags=26%, list=22%, signal=20%	3727/55651/2354/51079/26986/5438/10134/201254/59286/389362/8848
ZBTB24	26	-0.328976	-0.577696	0.945293	1	1233	tags=31%, list=22%, signal=24%	22821/153241/253461/24149/88455/56905/9679/864
ZNF764	134	0.296209	0.786388	0.946809	1	1426	tags=25%, list=26%, signal=19%	9767/283489/4637/10169/7733/22928/23598/22869/91283/57343/55659/84747/79744/85364/5955/23270/26230/64921/6722/57684/144245/23326/146923/284309/22903/9329/4076/26013/9668/349075/2976/51204/154007
THAP2	86	-0.333613	-0.650992	0.946893	1	807	tags=7%, list=14%, signal=6%	5611/7439/91544/6303/54964/114769
E4F1	97	-0.341186	-0.666157	0.947548	1	1677	tags=20%, list=30%, signal=14%	6810/84449/55692/89846/80764/10068/100289019/79786/7156/9159/7297/23053/118813/5609/55367/6793/11188/2101/8767
NFKB1	449	-0.370798	-0.776365	0.94864	1	1183	tags=16%, list=21%, signal=14%	9107/55233/285966/23258/9583/26959/10725/64747/57085/5252/23308/1540/5048/79155/5894/84967/1105/27125/50618/267/57169/9766/51100/57471/3090/90268/119504/10318/57515/3421/51088/1408/92162/51343/5495/154881/7187/9451/571/3267/1453/8897/160760/51322/114882/51762/4780/5045/51696/51324/5966/10287/10672/10019/9267/3720/3656/84807/8878/7048/23268/6867/8202/51429/2872/5971/2683/4791/4067/23135/415116/7150
RREB1	315	-0.360886	-0.750429	0.948718	1	1396	tags=21%, list=25%, signal=17%	26524/7994/6455/11021/56270/90007/64928/51643/125150/2011/5970/285550/388753/1743/55700/8408/57617/11057/23258/339487/5252/5894/22877/27125/51621/267/55810/119392/401548/4335/90268/2889/119504/4627/27245/127829/1408/7030/51343/5914/4650/1453/8897/160760/114789/5045/51696/375035/54434/60685/26157/90427/55967/10019/9267/3720/2355/752/8178/55625/23268/8030/79585/84957/8202/9846/114769
ZNF689	53	0.302831	0.676499	0.949686	1	1315	tags=28%, list=24%, signal=22%	7733/92935/23598/57343/55659/7693/85364/23270/92595/26230/23326/146923/284309/200933/9329
ZNF786	14	0.281059	0.558491	0.950943	1	1050	tags=36%, list=19%, signal=29%	29902/84939/11128/25929/7753
HOMEZ	127	-0.34411	-0.681204	0.951246	1	1096	tags=15%, list=20%, signal=12%	5973/27342/2313/1540/1105/3663/93129/7454/5611/154881/8780/490/5966/6945/84458/1436/6867/6397/9960
ZNF235	408	-0.357559	-0.748394	0.951318	1	491	tags=3%, list=9%, signal=3%	23064/1396/6653/7402/6430/128346/968/10577/6277/7940/7305/7262/1471/2207
CTCF	371	-0.363943	-0.753782	0.951368	1	415	tags=2%, list=7%, signal=2%	150864/8030/2512/255809/7086/7940/7305/5199/2207
BARD1	349	0.277752	0.834269	0.951892	1	661	tags=10%, list=12%, signal=9%	4925/79682/3070/332/79915/9349/6147/6158/91298/63967/7153/400986/378708/10635/29937/6130/81624/708/11007/6124/5927/1033/5471/5984/1063/51053/7979/151246/11169/286827/4357/54069/81856/23594/23468
CEBPA	31	-0.328876	-0.577737	0.952618	1	1502	tags=29%, list=27%, signal=21%	23616/124997/1509/170394/1445/56905/3705/23654/3669
JADE2	313	-0.354937	-0.731659	0.952772	1	1692	tags=25%, list=30%, signal=19%	57589/283349/55717/64761/5204/22821/9138/5253/51564/23295/153241/150465/6874/3551/23030/4700/5720/100505641/867/124997/9394/5089/11215/1455/23250/3631/7297/57140/23053/256364/2011/79188/7392/2664/58515/29998/9909/11057/88455/57326/201176/23526/200014/51199/5594/23396/9926/5048/1209/55810/9612/118788/4335/23174/2889/83931/27245/11188/4650/5170/7016/10106/2137/196527/3716/55967/57217/9679/80709/191…
ZNF184	105	0.300144	0.751894	0.953271	1	1325	tags=31%, list=24%, signal=24%	3146/9767/10198/55342/10576/7733/51018/50810/25926/7693/11168/339324/163087/55726/1964/54465/142940/1653/55728/10314/81931/56898/90338/28977/64921/51427/3066/55132/284309/23173/10795/84503/9657
CHMP1A	237	-0.348681	-0.716279	0.956067	1	1385	tags=22%, list=25%, signal=17%	7297/23053/6455/11021/56270/80148/256364/118813/285550/388753/6464/1743/80727/23787/57617/5609/200014/79155/1209/51621/80305/222658/267/23353/2889/4627/83931/137964/4478/10844/7030/51343/4650/7187/5170/10106/2137/1453/5045/60685/2316/57217/9679/752/55625/1912/476/79585/84957/4215/54436/4245
GFI1	92	0.276714	0.681764	0.956204	1	337	tags=7%, list=6%, signal=6%	79948/9349/6147/2526/400986/6164
ZNF792	81	-0.316939	-0.620037	0.956522	1	436	tags=10%, list=8%, signal=9%	57085/222658/51100/27245/10106/169200/152007/1508
ZNF518B	197	-0.338299	-0.689018	0.956933	1	2010	tags=28%, list=36%, signal=19%	2074/80006/989/6400/65056/59338/1657/254065/9867/4124/2332/23347/23033/23272/27436/23161/54878/51135/55717/66036/153241/324/84248/253461/9950/100505641/23253/4289/23325/9847/50862/23670/23451/9648/167153/22890/64860/5965/226/23473/6093/55914/162394/4238/4179/57515/9765/55088/23527/114882/6249/9101/55788/5782/6322
ZNF514	180	0.293713	0.786699	0.957143	1	1483	tags=44%, list=27%, signal=34%	9781/9331/135293/7915/4507/51768/64798/5311/6894/29902/166647/7108/54058/399687/10514/101929147/84140/3181/64794/80233/84939/55764/6621/23301/285349/152185/27130/401251/55752/10325/8924/63910/54914/8502/55622/1479/26751/54496/253769/53615/7343/636/11128/9875/25929/90861/11232/124454/7753/60526/84899/56339/51434/5378/8518/64210/326624/91433/622/91749/6693/6293/101060200/661/254042/79828/26013/8672…
ZNF345	475	-0.362945	-0.755339	0.958669	1	1160	tags=9%, list=21%, signal=8%	167227/64860/5965/226/117144/1540/23473/158830/1105/51185/2548/151056/6275/8887/26469/6093/7454/92799/57515/55088/8774/5495/51322/27166/26286/8742/6688/8741/9101/63940/4542/84458/5500/4683/3516/1522/665/23406/6277/7940/7305/1890/1471/6281/5199
RING1	462	-0.361654	-0.752789	0.958835	1	1514	tags=19%, list=27%, signal=15%	283643/9541/84247/124997/51714/10250/58533/5089/143384/1455/8677/51362/977/4055/54776/11078/9550/7297/80219/8446/256364/9218/9648/124491/57175/167153/5868/1145/5973/56674/826/170394/10159/58515/9909/57326/167227/200014/51125/55367/10434/51292/84905/51185/5330/8887/55911/119392/830/7454/4627/10844/55088/5611/219931/257106/2870/6643/6386/3705/116985/6778/6892/8780/23471/7320/9262/254102/54918/9101/…
CSRNP1	194	-0.345074	-0.700528	0.959788	1	826	tags=10%, list=15%, signal=9%	92162/7030/9545/10106/1844/160760/8428/55967/64857/5187/55122/7048/752/80149/4794/9308/2872/114769/415116
ZNF784	217	-0.340849	-0.697474	0.960084	1	1642	tags=23%, list=29%, signal=17%	9138/5253/25777/23295/5585/23030/4700/5720/84247/124997/9394/80271/5089/1455/160/11078/9550/7297/57140/23053/11021/256364/26093/388753/7392/57654/58515/80727/9909/57326/200014/6811/84905/4335/4627/5611/4650/7016/2137/3705/6892/7320/55967/2316/7094/9679/80709/6303/8514/114769
ZNF564	278	-0.344626	-0.721466	0.960905	1	1096	tags=18%, list=20%, signal=15%	101927275/54469/9870/164/7716/66036/5586/8702/9728/324/84248/27351/26190/79691/6670/23253/9541/4289/4204/6498/6309/142891/54882/7046/23075/118813/9748/26959/1540/23473/5894/1105/23438/10746/6093/4238/7454/57515/8774/5495/10308/79660/4780/6249/9101/5966/23064/84458/6867/330
ZNF497	61	-0.315052	-0.60195	0.961131	1	180	tags=13%, list=3%, signal=13%	7786/51292/114826/85007/7439/91544/54964/7321
SETD6	108	-0.337856	-0.657768	0.961712	1	332	tags=10%, list=6%, signal=10%	7786/51292/23438/114826/85007/7439/91544/2124/54964/7321/25798
ZNF565	279	-0.343116	-0.705031	0.962925	1	933	tags=10%, list=17%, signal=9%	85007/440400/7454/55969/2117/5527/5611/7439/8932/27166/6892/91544/6688/63940/2771/55122/7402/4193/79180/2124/6430/5566/23406/54964/25946/25798/9445/2907
ZNF548	442	-0.354262	-0.736114	0.96371	1	635	tags=4%, list=11%, signal=3%	23528/2014/6688/9975/10287/63940/6945/1396/6430/968/6277/7940/7305/1471/5199/2207
MYB	178	0.291525	0.779924	0.964912	1	1507	tags=45%, list=27%, signal=34%	6666/4678/135293/4507/23170/4796/55342/643699/5311/6894/8831/166647/22869/3150/79598/10514/143888/10644/1021/64794/80233/6621/23301/26354/26135/7514/152185/401251/29901/201255/55622/6427/5558/253769/10155/53615/51474/140680/9875/90861/7753/50808/60526/84899/51626/64921/54919/5378/8683/9987/3066/8518/2178/6929/91433/64770/7023/6293/57534/64175/79828/4076/10128/8672/25920/6426/2976/6599/5921/3295/1…
TEF	37	-0.311488	-0.565545	0.965131	1	1634	tags=41%, list=29%, signal=29%	5253/4524/124997/22879/7297/23053/24149/84254/9854/2889/11188/91373/5170/2137/9679
ZBTB4	141	-0.32097	-0.6487	0.965934	1	1501	tags=21%, list=27%, signal=16%	1314/867/4204/80271/1455/23053/2011/9320/170394/11057/23258/200014/5594/23396/5048/6811/222658/10318/83931/27245/23338/7030/4650/219931/5170/5663/60685/54926/23433/79890
TCF7L2	96	0.28903	0.724005	0.966387	1	538	tags=11%, list=10%, signal=11%	66005/204/84153/8607/25911/10785/349565/79622/4521/25886/8479
MTA2	418	-0.352062	-0.73335	0.966667	1	1499	tags=21%, list=27%, signal=16%	867/124997/51714/10250/80271/5089/1455/25994/3654/160/54776/3340/9550/7297/23053/11021/51643/256364/26093/285550/388753/1145/1743/2664/10159/9903/58515/55700/57617/9528/5609/55529/200014/51125/84254/7786/5252/6811/51621/267/119392/9854/23353/119504/830/4627/9123/1729/11342/6016/4478/10844/7030/4650/5878/10106/285381/6892/114789/6451/23471/7320/5045/375035/60685/254102/128866/55967/2316/1794/7094/…
ZNF714	87	-0.321153	-0.622828	0.967008	1	610	tags=5%, list=11%, signal=4%	6688/63940/23406/7305
TFAP2E	63	-0.314164	-0.596953	0.967175	1	122	tags=8%, list=2%, signal=8%	113/114826/85007/11188/9445
ZFP82	75	0.291347	0.677979	0.96748	1	1316	tags=36%, list=24%, signal=28%	54941/7561/7738/7733/51018/81856/64395/440515/11168/339324/163087/57489/1653/64417/81931/56898/90338/10146/7675/79088/7247/51427/284309/162655/10795/283209/84503
DNTTIP1	48	-0.307676	-0.573156	0.968408	1	1274	tags=19%, list=23%, signal=15%	22890/1192/51119/84967/50640/440400/9975/6945/9114
ZNF101	430	-0.357958	-0.743281	0.96875	1	1600	tags=22%, list=29%, signal=17%	55692/324/84248/165918/22931/2052/79786/51128/79691/253461/23253/9541/5583/6498/10250/80830/143384/29115/55599/51131/142891/51362/4055/9159/80219/50862/23670/133746/8446/283635/100130476/57404/10087/23014/9648/197320/1843/124491/5868/100506860/56674/826/57103/79939/9748/80213/285966/100505576/1540/54978/158830/1105/51185/79661/57169/23438/8887/64397/162394/4238/1387/7454/23479/55969/57515/5527/55…
NAP1L1	138	-0.329637	-0.661215	0.969231	1	16	tags=2%, list=0%, signal=2%	9114/637/3958
ZNF668	90	-0.326172	-0.629896	0.969388	1	700	tags=6%, list=13%, signal=5%	6892/51228/55967/54964/9445
ZNF879	51	0.260693	0.608428	0.969512	1	1483	tags=33%, list=27%, signal=25%	104472715/22869/25888/163087/55728/90338/57496/64921/8518/57534/10795/23279/7743/9668/65250/5921/9202
ZNF175	109	0.288326	0.719755	0.969697	1	1507	tags=36%, list=27%, signal=27%	5588/9767/9793/5311/160897/197358/22869/7029/152185/339324/55835/1479/7705/81931/57496/25929/7753/50808/64921/706/51701/57147/8518/57534/4436/26013/7743/8672/6426/56916/65250/2976/154007/5921/22862/54497/9202/57189/7155
ZNF528	62	0.277135	0.636206	0.969925	1	1445	tags=29%, list=26%, signal=22%	9767/22869/57539/285349/339324/163087/90338/57684/284309/57534/26013/9668/150759/349075/56916/65250/154007/22862
ZNF81	324	0.272694	0.811307	0.970185	1	1050	tags=19%, list=19%, signal=16%	5336/11224/4602/25873/9781/56479/7915/4507/10198/51768/6208/6209/220988/5311/6894/197358/489/166647/9735/514/22869/399687/7468/79598/10514/1021/3181/64794/80233/55764/6621/2887/23301/6631/57521/25888/7514/152185/27130/401251/8924/672/54914/8502/55622/79895/27340/26751/5558/253769/64434/53615/7343/145508/11128/57496/9875/25929/90861/7753
SP2	309	-0.350796	-0.725184	0.97137	1	1309	tags=16%, list=23%, signal=13%	5970/81609/388753/100506860/7392/219333/2664/58515/29998/80727/4629/26137/7786/90203/6811/1519/7077/1209/55810/9612/4335/5879/83931/23338/127829/7030/5611/7439/7016/8932/10106/56994/6892/7320/91544/8428/79567/55967/55122/1912/23307/80762/6303/51274/79890/54964/114769/9445/602
ZNF417	210	-0.330772	-0.674861	0.971846	1	1157	tags=16%, list=21%, signal=13%	100874272/54882/9159/10658/23053/11021/118813/26093/1743/200014/9583/7786/5894/51621/23438/10475/9766/55281/8837/440400/256356/90268/6016/4650/1453/8897/83442/375035/100128537/7402/6574/56882/283131
JUN	14	-0.291808	-0.481419	0.971871	1	1318	tags=29%, list=24%, signal=22%	388/1843/467/23471
NRF1	187	-0.33852	-0.686215	0.972222	1	1118	tags=15%, list=20%, signal=12%	100505576/1540/5048/5894/27161/60436/57169/26469/64397/9766/1387/7454/2117/7187/1453/8897/401494/51230/23315/6249/9936/9267/3720/84458/1200/5770/11214/6397
HIRA	220	-0.337762	-0.688637	0.972718	1	1508	tags=22%, list=27%, signal=17%	2787/867/124997/80271/5089/1119/1455/7156/3340/9550/7297/23053/11021/51643/256364/2011/285550/388753/9320/1743/11057/5609/200014/5048/6811/51621/222658/267/119392/2889/119504/4627/10844/51343/4650/5170/2137/8897/6451/5045/375035/60685/254102/55967/57217/9679/1912/476
CENPBD1	14	0.282355	0.54942	0.973064	1	4012	tags=100%, list=72%, signal=28%	64110/11128/55751/3140/5571/25979/7508/58500/8405/79165/8019/112950/51478/80764
ZSCAN26	480	-0.351135	-0.732859	0.974849	1	630	tags=4%, list=11%, signal=4%	2014/6688/9101/63940/2771/1396/4683/7402/5728/6430/255809/968/23406/6277/7940/7305/1471/25798/3460/6281/5199
ZNF558	324	0.320914	0.930324	0.977256	1	806	tags=11%, list=14%, signal=10%	11224/5567/6223/4602/6136/3178/3146/9767/10198/4637/521/6209/83990/6187/220988/5311/6894/10576/9735/57181/3187/22869/3150/79598/1021/3181/3998/25926/134637/57539/26354/6631/7514/152185/27130/401251
ZBTB37	173	-0.314727	-0.642988	0.978541	1	1480	tags=17%, list=26%, signal=13%	57105/118491/23250/100874272/3631/7297/23053/256364/121274/23405/57654/9320/1743/26523/200014/7786/55281/8837/9123/4650/219931/4122/375035/57674/1794/100128537/7402/4327/283131
SATB1	25	0.238309	0.514142	0.978541	1	4260	tags=100%, list=76%, signal=24%	101927777/79668/4208/10915/26054/55749/27252/51136/51663/6908/51574/1998/55754/90806/55284/7707/25957/64421/148867/10513/54851/80006/57092/55599/9648
RBSN	309	-0.333172	-0.689141	0.97955	1	1096	tags=14%, list=20%, signal=12%	100505576/1540/23473/5894/79661/3965/57169/23438/64397/91526/9766/6093/8837/440400/7454/147179/2117/3985/55088/8774/5611/154881/83442/79670/151556/10379/23528/255394/6249/9101/5966/10094/55819/84458/6574/4193/6867/6322/221178/6397/54964/330
ZNF283	209	0.303648	0.828214	0.979592	1	1487	tags=40%, list=27%, signal=31%	5588/4507/10198/5311/6894/160897/166647/9735/28981/22869/101929147/3181/64794/2887/23301/26354/285349/25888/7514/152185/55120/27130/8924/55835/672/8502/55622/1479/27340/26751/5558/253769/51474/7705/26263/84083/145508/11128/57496/9875/25929/90861/124454/7753/84914/60526/84899/51626/51434/5378/27085/57147/8518/64210/91433/51134/64770/91749/6293/57534/101060200/4436/254042/23279/79828/26013/7743/867…
SETDB1	182	0.266437	0.737335	0.98	1	1523	tags=31%, list=27%, signal=23%	5336/9781/158405/4507/6894/489/23598/22869/399687/7468/64794/79724/55764/8568/6621/23132/57521/27130/401251/8924/116840/253769/7343/55813/11128/9875/25929/90861/7753/84914/84899/51434/84922/57147/8518/8125/64210/91749/6293/57534/4076/26013/7743/23151/25920/285033/2976/5921/54497/26000/9202/57189/23028/9761/1374/23195
ZBTB42	25	0.230285	0.486061	0.980952	1	935	tags=28%, list=17%, signal=23%	399687/79724/8568/57521/8924/116840/84033
ARID1B	200	-0.325277	-0.658271	0.981013	1	405	tags=3%, list=7%, signal=3%	4026/9114/2512/57222/6282/3958
ZNF394	130	-0.312206	-0.62406	0.981339	1	1459	tags=18%, list=26%, signal=14%	400916/143384/29115/9159/80219/23670/124491/826/27342/79939/1540/51119/50640/57169/7454/2117/51526/8774/154881/27166/23528/5966/6430/6397
ZSCAN21	60	0.232395	0.570753	0.981481	1	1169	tags=30%, list=21%, signal=24%	29893/60509/81856/100129387/161779/51491/5032/55556/100132774/200205/11128/100506436/257169/84914/56339/10585/84942/27085
ZNF526	105	-0.317362	-0.613747	0.98188	1	2013	tags=25%, list=36%, signal=16%	11176/2580/79869/6667/51780/55593/80331/130074/79091/9870/124997/80271/23053/80148/1743/8408/57617/11057/125170/200014/10844/51343/4650/8897/6451/60685
HSF4	114	0.271319	0.698996	0.982301	1	960	tags=18%, list=17%, signal=16%	5336/6300/23170/4796/64098/113655/399687/10514/80233/79724/6621/6487/29920/9401/201255/116840/54496/253769/53615/7343/2068
RBCK1	472	-0.34515	-0.72054	0.982915	1	1096	tags=14%, list=20%, signal=12%	1540/29110/5894/1105/84905/27125/3663/3965/5791/56940/50640/5330/26469/10746/57471/51411/6093/93129/7454/92799/2117/57515/55088/8774/5611/5495/154881/94056/10308/51322/6778/79660/8780/51762/490/51696/27239/8742/54918/6249/8741/80315/9101/5966/10287/10672/4542/55454/6945/3720/84458/1436/9958/5500/64174/3516/6867/19/51429/3091/3459/665/10010/6916/6404/7150
ZNF10	235	-0.322545	-0.658639	0.983299	1	1159	tags=11%, list=21%, signal=9%	64860/226/10725/117144/1540/1105/27125/6275/50640/7454/57515/8774/9451/83442/27166/8742/6688/8741/5966/10094/10287/6945/7305/1471/5199
ZNF28	212	0.270467	0.755464	0.983333	1	1131	tags=18%, list=20%, signal=15%	5567/64116/79915/54149/9793/83990/160897/7738/7733/51018/11169/22869/81856/57343/65062/25926/11168/339324/163050/163087/79744/57489/5955/55726/54465/142940/1653/7705/10733/55728/10314/81931/56898/90338/7675/79088/7247/64921/51427
ZHX2	72	-0.294255	-0.562908	0.983796	1	1453	tags=18%, list=26%, signal=14%	54737/9550/57404/23014/100506860/58515/8887/3454/5527/6892/26286/965/7320
ZNF93	152	0.27927	0.731691	0.984615	1	1445	tags=26%, list=26%, signal=20%	5567/64116/9767/54149/83990/160897/7738/90488/7733/22869/440515/3998/339324/163087/5955/55726/54465/142940/7705/56898/90338/50808/64921/51427/706/57147/3066/55132/55345/1763/57534/10795/9657/7743/27316/55591/56916/65250/154007/22862
KAT7	350	-0.32616	-0.674544	0.984818	1	1286	tags=13%, list=23%, signal=11%	285550/388753/22890/1743/11314/55700/57617/5609/55233/26959/10725/57085/5252/22877/84967/10499/27125/51621/267/400569/51100/90268/147179/1408/51343/9451/571/10106/160760/51322/51696/375035/10627/9975/10287/55967/10200/7048/152007/8030/5971/1438/114769/6282/1508
PURA	14	0.229941	0.459515	0.98556	1	4304	tags=100%, list=77%, signal=23%	54069/80227/440574/25979/79717/9789/130617/5305/8405/54971/54737/64928/51643/388753
ZNF547	85	-0.297036	-0.571433	0.986348	1	1428	tags=14%, list=26%, signal=11%	25994/9550/8446/283635/388753/58515/4627/1729/5527/7320/254102/6993
BOD1	206	-0.322756	-0.660236	0.987448	1	901	tags=12%, list=16%, signal=10%	9341/5879/23338/9545/5611/60490/7016/10106/6892/7320/9051/91544/8428/3716/55967/64857/57217/55122/7048/6303/79627/54964/114769/9445
ZNF773	221	-0.313396	-0.644962	0.987474	1	1563	tags=17%, list=28%, signal=13%	84248/2052/27351/79691/9541/143384/142891/51362/80219/8446/10087/23075/23014/9648/118813/1843/5868/2553/79939/9748/64860/1540/51185/23438/26469/7454/55969/57515/79660/23528/8742/9101/10094/63940/84458/128346/7940/7305
ZNF500	129	0.266417	0.689669	0.987805	1	1133	tags=36%, list=20%, signal=29%	54865/286467/83743/142/79921/57546/84937/84296/8479/252839/55152/60509/54069/81856/124540/101929147/23468/84140/65094/54903/84939/2618/10081/80227/285349/55750/55120/5032/4723/151313/54496/81890/26995/11128/10528/25929/11232/124454/7753/84914/56339/10585/90529/51434/84942/23076
GTF2IRD2B	23	0.237467	0.512961	0.987805	1	1414	tags=26%, list=25%, signal=20%	283489/22869/84899/64921/56916/2976
ZNF710	428	-0.325467	-0.683036	0.988889	1	1502	tags=20%, list=27%, signal=16%	23616/867/84247/124997/51714/5089/1455/23250/7156/160/54776/3631/3340/11078/9550/7297/57140/23053/256364/2011/7392/57654/2664/170394/58515/24149/80727/9909/57326/201176/23218/23526/200014/55367/5594/79767/23396/113/84905/1445/5330/55911/9612/9854/4335/2889/4627/83931/11188/23338/10844/79716/5611/4650/219931/257106/5170/7016/2870/2137/3705/116985/6778/6892/23654/7320/254102/55967/2316/1794/7094/57…
ZNF227	253	-0.314569	-0.643632	0.989616	1	267	tags=2%, list=5%, signal=2%	1396/968/7305/1471/5199
CREB3L2	399	-0.328713	-0.685192	0.989909	1	848	tags=9%, list=15%, signal=8%	3421/127829/7030/5495/10106/56994/1453/51322/6892/7320/219771/51696/54434/8844/60685/9051/91544/79567/3716/10672/55967/80273/9444/55122/7048/169200/152007/1912/8030/8202/5538/9846/51274/54964/114769/4067/1508
ZNF550	122	0.259426	0.668352	0.990099	1	1325	tags=34%, list=24%, signal=26%	9331/9767/10198/9793/1072/10389/22869/440515/57343/25926/55127/7693/7029/285349/339324/163087/79744/57489/55726/7705/10314/81931/56898/90338/10146/25929/7675/64921/51434/706/57684/56061/57147/55132/284309/57534/4436/23173/23279/23318/9657
HDAC3	138	-0.294874	-0.59698	0.990228	1	848	tags=7%, list=15%, signal=6%	3421/9545/9144/6892/55967/80273/7763/79890/1508
NAP1L4	487	-0.330785	-0.688917	0.990955	1	630	tags=5%, list=11%, signal=5%	2014/6688/9101/10094/63940/29800/2771/84458/1396/440836/7402/6574/2124/6430/968/972/665/23406/10577/7940/7305/1471/25798/6281/7150/1052
ZBTB25	476	-0.314083	-0.659162	0.991976	1	728	tags=6%, list=13%, signal=6%	79670/151556/27166/6892/7320/51230/255394/6688/6249/55967/9709/63940/2771/84458/55508/1200/55122/150864/7402/4193/79180/6430/23406/54964/25946/1471/25798/2907/330
ELF1	495	-0.332041	-0.695407	0.991992	1	1554	tags=20%, list=28%, signal=16%	374395/5828/27351/79691/6670/23253/9541/55041/4289/55004/58533/3845/400916/51582/143384/8677/142891/51362/4055/50865/7994/10658/80219/23451/9218/10087/9648/23558/124491/167153/5868/253832/22890/2553/826/27342/9748/9107/221037/167227/2181/26959/10725/1540/51119/29110/1105/51185/27125/3663/6275/50640/8887/51100/6093/54790/7454/2117/57515/51526/55088/8774/5495/154881/94056/9451/571/160760/10308/5132…
CREB3	106	-0.285159	-0.558488	0.99209	1	1095	tags=10%, list=20%, signal=9%	90203/84967/400569/85007/53917/3421/91544/10672/23307/51274/54964
SIRT2	199	-0.314047	-0.637653	0.992685	1	964	tags=9%, list=17%, signal=8%	51100/51411/57192/119504/53917/3421/734/51324/9051/10287/3055/27036/152007/83937/128346/6404/388325/29992
ZNF669	40	-0.266922	-0.483988	0.992701	1	635	tags=8%, list=11%, signal=7%	23528/8742/8741
ZCWPW1	138	-0.294964	-0.59218	0.993555	1	261	tags=2%, list=5%, signal=2%	51274/25798/602
STAT5A	203	-0.303024	-0.612025	0.993658	1	202	tags=5%, list=4%, signal=5%	4650/10106/4122/8844/3716/55967/57222/79890/3398/114769/1508
ZNF212	385	-0.321883	-0.671548	0.993896	1	2125	tags=33%, list=38%, signal=22%	143187/9043/10564/80204/1106/342371/8239/4711/79594/9520/4729/25909/25948/23011/11176/9962/80006/3613/6774/4259/54520/58490/6780/55667/3964/29907/201627/254065/9867/23429/55030/728642/51780/79629/55593/2332/23347/84085/56990/130074/54518/22794/54870/54469/55773/9870/8816/54878/164/7716/66036/3839/5586/201475/57403/8702/9728/8867/324/84248/11044/79786/27351/26190/79691/6670/55041/4289/63916/5130/6…
ACTR8	110	-0.288433	-0.562311	0.994518	1	1904	tags=28%, list=34%, signal=19%	2073/83440/6667/201627/254065/159013/51780/57645/23033/51135/55717/143/9950/1314/5130/22879/23053/29066/57798/9320/26523/200014/5594/5048/222658/401548/51088/2182/5170/5663/23064
MTERF2	48	0.205476	0.479449	0.994792	1	1300	tags=29%, list=23%, signal=23%	10198/57181/134637/117177/55120/80173/10146/7675/51134/64770/55755/9933/29966/23279
SFMBT2	314	-0.315627	-0.657203	0.994908	1	1336	tags=17%, list=24%, signal=14%	7046/29066/10659/23405/253832/200186/219333/9320/23258/51199/9583/26959/10725/57085/23308/5048/5894/27125/222658/267/55810/51100/57471/401548/55785/90268/137964/5495/4650/9451/571/10106/3267/1453/8897/160760/51322/51762/51696/54434/8844/3716/90427/10672/9267/23064/57217/3720/9444/7048/752/8202/55824/79627
MEF2D	463	-0.306851	-0.643468	0.994985	1	1367	tags=20%, list=24%, signal=17%	6455/11021/90007/64928/51643/57404/26093/2011/5970/81609/285550/388753/100506860/7392/1743/2664/115992/10159/58515/29998/55700/23787/64343/339487/4942/132320/5252/23308/51341/6811/375387/1209/51621/170954/80305/267/55810/8887/9612/119392/56905/4335/90268/2889/119504/4627/55969/1729/126917/127829/1408/7030/51343/5914/4650/5878/83985/7016/10106/160760/6892/114789/965/23654/7320/54434/60685/51635/79…
NR2F6	41	0.225871	0.514616	0.995025	1	960	tags=24%, list=17%, signal=20%	4796/8704/92935/50512/79724/6621/29901/10155/53615/2068
LBX2	31	0.246009	0.531957	0.995455	1	1242	tags=32%, list=22%, signal=25%	8607/55152/10471/8568/51491/100132774/1174/100506436/78992/79064
ATF7	135	-0.285742	-0.56651	0.995556	1	1634	tags=24%, list=29%, signal=18%	5253/51564/143/150465/6874/3551/867/29115/23250/2987/5925/9731/85414/79188/5062/58515/9909/2313/57446/22864/5594/55858/23396/84905/93129/4261/23196/23338/94056/6778/196527/1612/92241
ZNF721	158	-0.2896	-0.582615	0.995657	1	1144	tags=10%, list=20%, signal=8%	26959/226/10725/5048/6275/10150/51100/5495/9451/51322/51762/2308/8742/8741/169200/64115
ZNF32	150	-0.272985	-0.550847	0.995717	1	431	tags=5%, list=8%, signal=5%	752/8178/84957/9846/2872/51274/2683/3460
TIGD5	216	-0.303385	-0.624208	0.99582	1	1075	tags=15%, list=19%, signal=12%	81622/79188/5868/9404/170394/9909/27342/55367/10209/113/1105/84905/3663/1445/50640/5330/51526/154881/257106/2137/3705/2101/3683/6778/8780/7094/9958/8514/55701/3091/92241/131870
ZNF14	381	-0.307738	-0.641337	0.995943	1	1683	tags=20%, list=30%, signal=15%	164/7716/3839/5586/3572/9728/373156/324/84248/22931/51128/27351/79691/6670/23253/9541/4289/6498/3845/400916/8677/142891/221/54882/51362/7994/80219/23670/133746/23451/9648/167153/5868/22890/2553/826/27342/9107/64860/26959/226/10725/117144/1540/51119/23473/1105/27125/6275/50640/6093/7454/57515/55088/8774/5495/154881/9451/571/51322/8780/51762/23528/9262/8742/6688/8741/9101/9975/5966/10287/10672/6945…
ZNF513	464	-0.314211	-0.653477	0.995972	1	846	tags=10%, list=15%, signal=9%	4478/10844/79716/7030/5611/4650/219931/257106/5170/7016/2870/285381/116985/4122/6778/6892/6451/23654/23471/7320/60685/51228/254102/55967/9709/2771/2316/57217/9679/80709/5500/752/1912/476/79585/8514/11261/9846/55701/1522/157/2185/64005/56882/3398/4327/114769
ARID1A	473	-0.316794	-0.661152	0.995984	1	1396	tags=15%, list=25%, signal=12%	26524/7994/23053/6455/64928/51643/58472/29066/2011/5970/23405/285550/200186/388753/219333/9320/29998/8408/10095/3939/5609/9583/26959/292/10725/57085/5252/5048/23473/5894/22877/1209/10499/8021/27125/51621/50618/55810/400569/51100/90268/1387/119504/27245/147179/3421/51343/5495/4650/9451/1453/8897/51322/114882/5045/51696/54434/91544/9975/55967/23064/152007/8030/2512/5538/114769/23135/1508/5199
BRD9	53	-0.278406	-0.521157	0.996462	1	1780	tags=23%, list=32%, signal=16%	7391/6810/84449/10068/9159/7297/118813/57654/200014/7786/23353/2101
HHEX	107	-0.263767	-0.522216	0.99667	1	837	tags=11%, list=15%, signal=10%	90203/6811/400569/51100/127829/7030/10106/9051/55122/51274/114769/9445
CEBPG	272	-0.296093	-0.611058	0.99691	1	2137	tags=31%, list=38%, signal=20%	126731/23131/10006/84897/26065/253959/51592/80351/7159/139231/10427/285237/54851/57826/143187/9043/10564/80204/8239/9520/8204/25909/25948/84933/80006/8813/6102/54520/58490/65056/3964/9867/7109/2332/130074/54870/54469/6868/55773/22919/56900/9870/57589/54878/164/7716/3839/57403/6655/9728/5828/79691/6670/55041/3845/54882/7994/23451/29066/167153/22890/9107/55233/26959/10725/1540/29110/23473/5894/1105…
ZNF557	354	-0.313229	-0.650322	0.996951	1	1456	tags=15%, list=26%, signal=12%	143384/29115/55599/977/4055/9159/80219/50862/23670/133746/8446/283635/57404/10087/23014/9648/118813/1843/124491/5868/100506860/56674/826/100505576/1540/54978/23473/8887/64397/6093/4238/7454/55969/2117/5527/55088/8774/5611/23471/7320/23528/6688/6249/9101/55819/63940/29800/2771/84458/6715/5500/4193/23406/330
PYGO2	99	-0.249535	-0.484217	0.997778	1	1277	tags=12%, list=23%, signal=10%	7392/6464/58515/57326/1209/9854/11188/23338/7016/285590/6303/8767
MEF2B	146	-0.274269	-0.555515	0.997831	1	1554	tags=16%, list=28%, signal=12%	374395/9541/55004/8677/4055/9218/11152/57175/5973/221037/1105/84905/6093/93129/830/7454/57515/8774/27166/8780/10287/6945/5500/4683
ZNF789	231	-0.29106	-0.596962	0.997908	1	473	tags=4%, list=8%, signal=4%	55508/55122/4193/2124/54964/25798/9445/2907/602
ZNF211	428	-0.312279	-0.649197	0.997976	1	1553	tags=18%, list=28%, signal=14%	51128/5828/27351/79691/253461/23253/9541/4289/6498/10250/58533/400916/143384/55599/142891/51362/4055/50865/80219/50862/23670/133746/23451/8446/57404/9218/10087/23014/9648/124491/5868/22890/826/9748/221037/167227/64860/5965/100505576/1540/29110/23473/1105/51185/50640/8887/64397/6093/55914/830/7454/5932/55969/57515/55088/8774/154881/10308/23471/23528/54918/6688/6249/9101/63940/84458/5500/150864/468…
SAFB	354	-0.300752	-0.623363	0.997982	1	1508	tags=23%, list=27%, signal=18%	54870/11212/84191/9842/9870/23207/57589/164/23303/201475/9728/4524/11044/374395/26190/2787/55041/1314/4204/55004/80271/1119/100874272/54882/7994/10658/23053/11021/56270/51643/118813/26093/285550/9320/1743/9903/8408/23787/57617/5609/9583/26959/10725/5252/5048/5894/22877/27125/51621/222658/267/9766/401548/90268/119504/6016/1408/51343/5495/4650/1453/8897/843/83442/160760/114789/6451/375035/10627/596…
ZNF333	91	-0.24853	-0.487448	0.998867	1	1393	tags=18%, list=25%, signal=13%	9159/11021/118813/23177/1743/26523/200014/7786/23438/9489/10844/7439/375035/91544/30817/54964
C11orf95	212	-0.259781	-0.532441	0.998963	1	928	tags=7%, list=17%, signal=6%	23353/4261/23338/4650/7016/10106/7320/9051/3716/55967/6303/57222/114769/1508
ZNF684	264	-0.2966	-0.601992	0.998971	1	1763	tags=23%, list=32%, signal=17%	56990/55012/54518/101927275/54469/10542/8915/9138/5805/84248/4700/22931/51128/9616/9541/51714/10250/143384/29115/25994/160/54776/9550/80219/8446/283635/9218/23014/9648/1843/124491/5868/2553/5973/56674/58515/9909/9528/1540/51185/5330/8887/26469/7454/23196/5527/5611/94056/2870/6778/6892/23471/7320/51228/254102/54918/4542/7094/84458/5500/6993
STAT3	289	-0.291317	-0.602591	0.998972	1	1016	tags=14%, list=18%, signal=12%	5791/57169/23438/8887/26469/64397/9766/8837/7454/9489/2117/3985/5527/5611/154881/7187/94056/79670/10379/79660/26286/7320/51230/23528/6249/9101/5966/10094/9936/3720/84458/1200/5500/94120/4193/5770/11214/5209/6397/54964/284996
NR1D2	359	-0.273003	-0.567035	0.998976	1	1833	tags=22%, list=33%, signal=16%	9665/7109/7799/2332/23347/51439/6881/80209/221079/54870/55773/22919/57589/164/7716/3839/3572/9213/6655/9728/996/153241/324/374395/9380/6670/6498/3845/54882/51362/7994/80219/2631/133746/23451/4214/29066/167153/22890/9107/55233/285966/1192/221037/2181/26959/226/1540/29110/23473/84967/1105/10499/27125/50640/10150/10746/51100/55914/90268/54790/57515/55088/8774/23527/9451/571/160760/10308/51322/8780/1…
ZNF143	295	-0.281222	-0.583484	0.998978	1	1160	tags=14%, list=21%, signal=12%	167227/5965/226/132320/7867/29110/5048/23473/3965/50618/8887/3454/65125/10475/10746/6093/54790/4179/11342/80853/9765/55088/23527/79670/151556/51322/5663/4780/255394/6249/9101/55062/23064/4683/3516/6322/972/665/10010/5788/7150
EZH2	374	-0.311843	-0.648365	0.998985	1	828	tags=9%, list=15%, signal=8%	55088/8774/64218/1774/154881/27163/83442/3705/27166/115727/23528/2014/8742/6688/8741/9101/63940/2771/84458/1200/5500/4683/6574/4193/6430/968/55701/665/23406/7305/1471/6281/7150
ETV3	351	-0.278002	-0.579906	0.998985	1	1096	tags=20%, list=20%, signal=17%	51128/27351/26190/23253/9541/55041/4289/63916/6498/55004/400916/143384/29115/142891/221/7994/10658/80219/23670/9218/10087/23558/124491/5868/826/27342/79939/951/26959/1540/51119/29110/1105/27125/3965/5791/50640/57169/26469/9766/93129/7454/23196/51526/8774/5611/5495/154881/27163/94056/79670/79660/51762/51230/51324/23528/9262/6249/9101/5966/10094/3720/84458/1200/5500/6867/11214/6430/6397/7150
UBE2A	432	-0.294313	-0.620194	0.998992	1	1731	tags=22%, list=31%, signal=16%	55080/54870/54469/55773/56900/57589/148423/164/7716/3839/5586/3572/57403/9213/6655/9728/153241/51727/8867/122525/10068/22931/5828/6670/6814/9541/23325/79572/10114/58533/3845/9847/51131/142891/51362/7994/2631/23451/9218/29066/167153/5868/200186/219333/2553/9107/55233/221037/167227/9583/26959/10434/10725/1540/29110/51292/1105/27125/50618/51014/50640/10150/51100/6093/85007/54790/5932/4179/5412/57515…
ZNF653	362	-0.259718	-0.540041	1	1	1413	tags=16%, list=25%, signal=13%	160/54776/3631/11078/9550/7297/23053/8446/9731/256364/256329/124491/388753/100506860/7392/57654/56674/10140/2664/10159/58515/9909/3939/55362/57326/23218/200014/55367/79767/6811/84905/51185/57210/8887/5912/9612/57658/9854/5527/11188/23338/5611/7016/2870/6778/6892/7320/254102/51635/55967/9709/7094/5500/6303/11261/6993/114769/427
ZNF23	141	0.176866	0.451482	1	1	1300	tags=26%, list=23%, signal=20%	10198/91298/80127/160897/1063/85444/151246/11169/22869/30061/134637/23301/117177/26354/152185/55120/55835/55071/3161/80173/26751/129642/699/7705/6217/11128/3040/5378/1763/51134/64770/55755/10592/29966/4436/23279
ZNF223	241	-0.208117	-0.431509	1	1	56	tags=1%, list=1%, signal=1%	1396/5199
HMGA1	393	0.292179	0.839711	1	1	622	tags=11%, list=11%, signal=10%	6218/6181/6168/201161/6224/3921/81620/6169/125144/6167/4833/6142/7311/6229/6624/84650/6193/9349/8420/6147/2091/6158/4736/400986/6164/29937/6130/57819/80127/6723/708/6143/6124/6141/653784/10541/254013/6434/9045/468/286827/4357/81856
ZNF619	379	-0.268988	-0.560781	1	1	849	tags=8%, list=15%, signal=7%	4261/4627/11188/10844/4650/219931/5170/2137/843/4122/375035/57674/254102/55967/2316/1794/7094/57217/9679/80709/476/100128537/10866/2512/8514/4853/157/57222/79026/283131
ZNF506	196	-0.20903	-0.425919	1	1	178	tags=7%, list=3%, signal=7%	10095/285966/64860/226/1540/158830/60436/6275/4668/5495/51322/6277/7305
ZNF169	220	-0.234177	-0.48053	1	1	223	tags=2%, list=4%, signal=2%	9750/2683/2495/25798
SAFB2	414	-0.251627	-0.523842	1	1	700	tags=6%, list=13%, signal=5%	6892/7320/91544/51228/6688/10094/55967/63940/9936/2771/84458/55508/55122/6715/4193/2124/6430/148022/23406/54964/25946/25798/9445/2907
ZNF747	247	0.21284	0.588438	1	1	1101	tags=21%, list=20%, signal=18%	5336/6666/9781/6300/7374/3182/8607/7915/4507/142/23170/4796/64098/471/23598/113655/54836/399687/64110/10514/54903/80233/5191/84939/79724/8568/6621/90956/6487/10061/57521/29901/29920/201255/221188/7157/54496/29985/253769/53615/7343/2068/27349/9875/90861/124454/7753/5188/50628/7263/9894/84899
ZKSCAN1	365	0.179397	0.519055	1	1	1286	tags=27%, list=23%, signal=22%	3159/7311/2193/54865/10198/400986/4331/55215/160897/84937/84296/29902/80321/254013/57181/28981/468/11169/283104/54069/81856/64395/58477/101929147/23468/84140/55759/65094/54903/100129387/375449/84939/375248/10455/2618/161779/10081/80227/23301/285349/55750/152185/55120/10325/55835/11198/1479/23635/80173/26751/100287765/51474/1653/7705/55813/64417/51023/57730/26263/84083/401207/11128/28986/57496/105…
ZBTB48	324	-0.176297	-0.365531	1	1	1422	tags=14%, list=25%, signal=11%	7156/54776/3631/11078/7297/23053/9731/256364/9218/5868/57654/10044/170394/9909/57326/23526/200014/55367/84958/79767/7786/90203/51292/10209/7084/113/84905/5330/114826/55911/57658/10008/85007/53917/11188/219931/257106/6773/116985/2101/6778/1201/55577/8514/55701/131870
RPS6KA3	434	-0.231158	-0.483241	1	1	1157	tags=13%, list=21%, signal=11%	200014/51199/5594/55858/23396/9926/5048/1519/10499/222658/23287/55852/51100/9991/2746/118788/7385/55914/23174/23196/83931/5412/1729/51088/23338/5937/2182/4650/23527/5170/10106/2137/5663/84888/196527/8844/3716/1362/1794/23064/9444/80709/8030/114885/8202/55824/2512/202/8301/4853/157/11213/5906/92241/10892/64744
BRD4	398	-0.292521	-0.610009	1	1	1317	tags=16%, list=24%, signal=13%	29066/2011/5970/100506860/7392/219333/9320/29998/11057/88455/140609/4629/5594/10725/7786/23396/9926/90203/5048/1209/10499/51014/55810/10150/9612/51100/55914/23174/2889/1387/83931/27245/5412/3421/23338/23527/7439/10106/56994/51322/6892/114882/4780/51696/196527/54434/60685/91544/8428/79567/3716/55967/9444/54926/8030/8202/80762/8301/123872/5906/10892/54964/114769/602
ZNF763	105	0.162254	0.408809	1	1	1483	tags=32%, list=27%, signal=24%	4507/5311/6894/197358/22869/101929147/64794/23301/25888/152185/27130/26751/253769/11128/57496/7753/84914/60526/57147/8518/6293/57534/101060200/23279/26013/7743/8672/6426/150759/65250/5921/101927027/54497/9202
BAP1	363	-0.182342	-0.378245	1	1	1508	tags=18%, list=27%, signal=14%	2787/1314/5130/4204/5089/1455/26088/7156/3654/54882/9159/7297/10658/23053/11021/80148/51643/256364/118813/26093/285550/57654/9320/1743/8408/23787/57617/5609/200014/9583/5252/5894/51621/80305/222658/267/9766/440400/23353/90268/2889/137964/11188/23108/10844/1408/51343/4650/5170/1453/8897/83442/4122/6451/5045/375035/10094/55967/9267/9679/79585/84957/4215/497661
CREBZF	301	0.242007	0.720482	1	1	806	tags=12%, list=14%, signal=11%	11224/4602/3178/6748/6173/746/6231/90480/9331/135293/9767/10198/4637/521/6209/220988/5311/6894/10169/90488/23642/9735/3187/22869/3150/79598/25926/1175/51079/26354/7514/5438/152185/27130/401251
CHD3	483	-0.231277	-0.483158	1	1	1283	tags=18%, list=23%, signal=15%	23250/7156/3654/160/54776/3631/11078/9550/7297/57140/23053/256364/256329/2011/388753/7392/57654/2664/170394/58515/24149/80727/9909/88455/3939/57326/23218/23526/200014/55367/84254/51092/10209/113/80305/1445/57210/5330/55911/9612/9854/56905/4335/2889/4627/126917/64072/11188/23338/10844/79716/4650/91373/219931/257106/5170/2870/2137/3705/116985/4122/151742/6778/6892/965/23654/7320/254102/55967/2316/1…
IKZF4	375	-0.260148	-0.54103	1	1	1904	tags=27%, list=34%, signal=19%	6667/3964/201627/254065/54877/5306/283149/9867/51780/9665/23476/7109/55593/2332/51317/55049/51439/23033/27020/57178/130074/80209/39/22794/54870/5721/9870/23207/57589/54878/164/7716/5204/9213/6655/5253/23295/153241/8867/6874/11044/5720/6670/79572/10114/1455/9847/79685/54882/2631/23053/29066/5970/23405/7392/219333/6464/9320/29998/24149/88455/3939/55233/9583/292/10725/5048/23473/5894/1209/10499/5061…
ZNF700	210	-0.158972	-0.326029	1	1	1953	tags=24%, list=35%, signal=16%	79684/9879/197258/55252/254065/51780/57577/9665/79663/23033/285512/23272/8648/3717/23161/51135/55717/80208/5586/9296/143/153241/29945/57186/5934/23325/5130/11215/9847/23250/54882/3631/23405/57654/9320/51199/9583/226/55858/23473/10499/22797/50618/4179/80005/23527/10346/11329/7402/2512
DIDO1	472	-0.151207	-0.31643	1	1	1732	tags=18%, list=31%, signal=13%	22794/54870/84191/9842/9870/8816/57589/164/55717/84449/201475/9213/9296/143/57186/4524/11044/22902/26190/2787/1314/867/5130/4204/80271/5089/1119/11215/1455/9847/9619/54882/9159/7994/7297/10658/23053/118813/29066/23405/57654/9320/1743/26523/8408/11057/5609/200014/51199/9583/5594/10725/57085/5048/5894/10499/51621/50618/222658/6275/57210/401548/90268/27245/23108/23338/51343/5495/4650/5170/1453/8897/…
BRD3	249	0.215051	0.603043	1	1	1284	tags=26%, list=23%, signal=21%	11224/10591/746/5037/90480/9349/6659/6147/51690/27089/400986/6164/378708/55651/2237/84937/254013/54069/81856/23468/751071/65094/375248/51021/51079/10081/80227/5438/5032/11198/94081/132299/81890/10134/64417/51023/57730/201254/11128/513/10528/81892/246243/257169/4725/51504/10585/90529/84942/131118/23076/55149/10236/80755/389362/400506/6742/79064/7064/81688/51728/580/8803/84262
ZNF444	399	0.253484	0.777322	1	1	960	tags=16%, list=17%, signal=14%	9315/5336/6666/4171/4602/9349/7374/3182/8607/133308/6147/7915/1017/4507/283489/6164/2189/6723/23170/708/11007/4796/8655/8831/197358/489/9196/23598/8574/113655/22869/9538/83596/64110/10514/6152/80233/284403/5191/79724/8568/6621/6487/10061/57521/10966/401251/29901/29920/9401/201255/115950/90378/2194/7157/54496/29985/253769/10155/9277/53615/7343/2068
ZNF362	217	-0.202789	-0.414752	1	1	1776	tags=22%, list=32%, signal=15%	57178/3916/39/2782/1112/10542/378938/23385/9138/5805/5253/23295/6874/5585/2004/23616/124997/29115/1455/2987/160/57140/5018/9342/100506860/7392/58515/29998/80727/9909/88455/4942/23396/1519/1209/1445/9612/2889/7454/23338/5611/83985/7320/1912/6303/54964/114769
ZNF630	276	0.207813	0.610025	1	1	1487	tags=38%, list=27%, signal=29%	54865/286467/4507/10198/5311/6894/160897/29902/9735/57181/28981/101929147/84140/55759/54903/3181/64794/134637/84939/2618/161779/23301/26354/285349/25888/152185/55120/27130/10325/55843/55835/672/54914/8502/55622/1479/79895/80173/26751/5558/54496/253769/51474/55813/26263/84083/145508/401207/11128/57496/9875/25929/7006/11232/7753/60526/10240/84899/56339/51626/51434/5378/57147/8518/9557/51134/64770/5…
ZNF675	381	-0.294738	-0.61864	1	1	1212	tags=19%, list=22%, signal=16%	3839/5586/57403/6655/9728/153241/51727/8674/122525/324/84248/22931/5828/9950/6670/23253/6814/9541/4289/58533/3845/9847/6309/54882/51362/7994/2631/23451/9648/29066/167153/5868/219333/2553/9748/10095/9107/55233/64860/26959/10434/226/117144/5048/23473/51185/6275/4668/10150/51100/11179/5412/57515/5495/23527/51322/114882/51762/8742/8741/9101/4542/55788/4683/64174/3689/3516/1522/7086/7305/29992/5199
THAP6	435	-0.251438	-0.526628	1	1	1530	tags=13%, list=27%, signal=10%	9950/23253/6814/9541/4289/23325/9317/58533/11215/54737/55599/5771/57035/9847/51131/54882/50862/23451/57404/9648/23405/167153/826/80213/64343/167227/64860/5965/226/132320/23473/51185/50618/23438/8887/6093/55914/4179/11342/9765/55088/8774/23527/5878/79670/2014/6688/6249/9101/203228/84458/4683/7402/3516/5788/330
ZBTB20	382	-0.279817	-0.582446	1	1	904	tags=8%, list=16%, signal=8%	7454/55969/5527/4478/127829/7030/5914/5611/5878/83985/7016/10106/6892/23654/7320/140885/6688/55967/63940/2771/84458/55122/1912/7402/79180/5598/23406/54964/25946/114769/25798/2907
SETD1B	478	-0.29118	-0.608778	1	1	1386	tags=19%, list=25%, signal=16%	7994/2631/23053/6455/90007/64928/58476/125150/7046/4214/29066/2011/5970/23405/200186/388753/7392/219333/6464/9320/115992/29998/24149/55700/8408/23787/57617/88455/3939/55233/285966/9583/26959/292/5252/51341/23473/5894/22877/1209/10499/51621/170954/267/55810/9612/51100/9854/56905/4335/90268/2889/1387/27245/5412/147179/80853/23338/127829/1408/23130/51343/4650/23527/5170/9451/571/10106/3267/8897/5132…
ZNF672	343	-0.303408	-0.632348	1	1	1645	tags=26%, list=29%, signal=20%	55048/9138/5253/25777/23295/150465/3551/4524/89846/4700/5720/283643/84247/124997/22879/10250/80271/5089/1455/9704/23250/7156/160/54776/3631/9550/7297/57140/80219/23053/8446/256364/124491/2011/7392/57654/2664/170394/58515/80727/9909/11057/23526/200014/55367/5594/55858/23396/6811/10209/113/51185/1445/57210/998/55911/4627/83931/9123/23338/10844/51526/5611/4650/219931/257106/5170/7016/2870/2137/3705/…
ZNF7	469	-0.272576	-0.571171	1	1	1000	tags=16%, list=18%, signal=14%	64928/283635/100130476/51643/57404/23014/5970/10955/81609/388753/100506860/7392/55707/23177/56674/2664/10159/58515/29998/55700/4629/27071/26137/7786/132320/51341/54978/6811/51014/400569/23438/8887/64397/91526/9612/85007/7454/55969/5527/127829/7030/9545/5611/60490/7439/10106/6892/965/7320/51230/9051/91544/51228/51635/55967/63940/2771/55508/55122/4193/79180/147650/79627/11261/148022/7763/5566/54964…
ZXDA	248	-0.28713	-0.590807	1	1	848	tags=7%, list=15%, signal=6%	3421/1408/9545/571/10106/160760/219771/9051/3716/10672/55967/27242/57217/7048/637/2872/114769/1508
CARF	320	0.289532	0.838176	1	1	1451	tags=33%, list=26%, signal=26%	5567/4602/9781/5588/3146/9331/55225/135293/7915/4507/10198/55342/5311/6894/160897/10606/85444/9735/57181/28981/22869/79598/79649/84140/1021/3998/134637/23301/26354/285349/7514/152185/55120/11168/27130/339324/401251/55752/10325/55843/55835/672/54914/55622/57489/1479/80173/26751/5558/253769/51474/7570/7705/84083/10314/57496/25929/7675/7753/50808/57494/60526/10240/84899/2967/51626/64921/51434/5378/5…
RNF2	490	-0.287288	-0.600646	1	1	1221	tags=20%, list=22%, signal=17%	7716/3839/5586/9213/6655/9728/373156/996/153241/51727/8674/122525/324/51510/84248/10068/22931/5828/9950/6670/100505641/23253/6814/9541/4289/23325/10114/60682/58533/3845/11215/51582/8677/9847/6309/2631/23451/9218/9648/29066/167153/5868/219333/51167/9748/9528/140609/64343/9107/55233/167227/64860/51125/5965/51170/10434/226/90203/23473/51185/3987/51014/10150/51100/9991/11179/55914/54790/830/5932/4179…
ZBED5	419	0.168253	0.496511	1	1	806	tags=8%, list=14%, signal=8%	5567/6136/3178/6748/3146/262/9767/10198/4637/6209/83990/6187/5311/6894/160897/7733/9735/57181/3187/28981/22869/3150/79598/3998/25926/134637/57539/26354/6631/7514/152185/11168/27130/339324/401251
ZNF25	364	0.215593	0.650055	1	1	792	tags=10%, list=14%, signal=9%	6175/5567/6136/6167/6157/6176/3146/6193/6161/10198/80097/6209/83990/6187/5311/160897/6141/85444/55916/9735/151246/28981/6188/11169/22869/79598/79649/3998/25926/134637/23301/26354/7514/10399/152185
ZNF799	487	-0.201648	-0.420385	1	1	1301	tags=11%, list=23%, signal=9%	23405/167153/253832/22890/219333/9320/10095/140609/9107/55233/64860/26959/226/10725/57085/1540/5048/23473/1105/10499/27125/50618/222658/6275/10150/51100/100505483/6093/55914/54790/5932/4179/5412/57515/3421/8774/5495/23527/9451/571/51322/114882/51762/51696/9975/23064/1396/169200/22936/7086/7305/5199
ARHGAP35	348	-0.218127	-0.454213	1	1	1661	tags=22%, list=30%, signal=16%	5204/80208/9138/5253/25777/143/150465/55568/6874/57186/3551/23030/4700/100505641/867/84247/124997/9394/5089/11215/1455/23250/5925/54776/3631/3340/7297/23053/253430/9731/256364/121274/5062/57654/9320/58515/9909/11057/88455/57326/200014/51199/5594/55858/23396/5048/10499/222658/55852/9612/23174/2889/83931/11188/23338/4650/219931/5170/10106/2137/79888/6778/196527/3716/1794/1612/7094/9679/80709/476/25…
ZNF324B	482	-0.287191	-0.600849	1	1	1456	tags=19%, list=26%, signal=15%	143384/29115/1455/23250/7156/160/4055/54776/3631/11078/9550/7297/57140/80219/23053/8446/9731/411/256364/9218/256329/121274/81622/79188/5868/5062/57654/5973/56674/170394/58515/1389/9909/2313/57446/57326/201176/23218/22864/23526/200014/55367/55858/79767/23396/10209/113/84905/1445/79815/55852/5330/998/114826/9612/93129/23196/11188/23338/51526/5611/94056/219931/257106/2870/2137/3705/116985/90637/2101…
KDM4A	134	-0.198124	-0.398113	1	1	1780	tags=21%, list=32%, signal=15%	7391/54884/79091/84449/23303/25777/10068/26190/2787/80271/54108/7156/23053/11021/118813/1743/26523/200014/7786/23438/55281/9123/9489/10844/7439/375035/100128537/2124
ZNF621	286	0.213449	0.607286	1	1	796	tags=13%, list=14%, signal=12%	4282/6748/56479/158405/5757/9767/23480/4507/10198/1953/517/220988/5311/6894/140823/166647/3187/514/22869/399687/7468/101929147/1021/7158/54539/64794/1175/55127/55764/161779/57539/285349/6631/23132/57521/152185/27130
THAP1	209	-0.19588	-0.403697	1	1	1509	tags=13%, list=27%, signal=10%	9541/51714/10250/58533/9550/80219/9218/124491/22890/51167/9528/51125/10434/51119/51185/8887/830/5932/9123/10844/6643/6451/23471/254102/119032/150864/5728/1522
BRD7	212	-0.25694	-0.526335	1	1	491	tags=3%, list=9%, signal=3%	23064/9679/2512/2124/497661/1052
SMYD4	262	0.27899	0.777491	1	1	1283	tags=39%, list=23%, signal=31%	55536/2193/54865/10436/4172/8607/85413/51154/286467/4507/10785/84284/84941/142/28958/84296/29902/5575/8479/54058/55152/113655/594/101929147/84140/55759/65094/54903/64794/84939/2618/161779/8568/80227/23301/10061/55750/152185/55120/29920/10325/672/8502/4723/55556/326625/1479/151313/7157/26751/54496/23065/81890/253769/100129858/26995/5832/9277/7343/26263/60386/145508/401207/11128/9875/10528/245812/2…
ZNF18	191	-0.194733	-0.397838	1	1	1379	tags=10%, list=25%, signal=8%	80219/50862/23670/23451/8446/57404/23014/124491/64860/1540/51185/23438/8774/23528/6688/84458/150864/4193/6430
ZNF397	187	-0.227528	-0.463536	1	1	466	tags=3%, list=8%, signal=3%	55122/7402/51274/25798/602
ZNF225	231	0.187934	0.523699	1	1	1507	tags=26%, list=27%, signal=20%	64116/9767/10198/9793/7486/83990/160897/7733/11169/22869/81856/57343/55127/57539/26354/285349/23132/25888/7514/339324/163050/163087/79744/54465/142940/7705/10314/81931/11128/56898/90338/10146/92595/51626/64921/27085/57684/144245/57147/55132/8518/55345/284309/57534/10795/23279/7564/26013/7743/9668/56916/65250/154007/5921/22862/126070/54497/9202/57189/7155
ZNF517	201	0.253961	0.70293	1	1	1096	tags=22%, list=20%, signal=18%	5336/6300/8607/10785/1953/489/23598/7108/55152/60509/399687/83596/10514/126299/10471/64794/80233/84939/79724/55764/8568/6621/51491/23132/57521/29920/8924/116840/100132774/54496/23065/84033/253769/9277/7343/1174/11128/9875/100506436/124454/50628/84914/56342/9894
TCF20	357	-0.263087	-0.553221	1	1	1676	tags=23%, list=30%, signal=17%	55717/84449/5204/23303/201475/22821/5253/25777/143/150465/3551/4524/11044/23030/4700/2787/1314/867/5130/124997/9394/80271/5089/1455/23250/7156/3631/3340/7297/23053/11021/256364/2011/23405/57654/9320/1743/9909/11057/5609/200014/51199/5594/5048/10499/222658/55810/57210/401548/23174/90268/2889/4627/83931/23338/3566/4650/219931/257106/5170/10106/2137/8897/5663/54434/8844/60685/10507/57674/3716/55967/…
RFX1	448	-0.279357	-0.581156	1	1	1465	tags=20%, list=26%, signal=16%	5089/143384/29115/1455/23250/5925/160/4055/54776/3631/11078/9550/7297/57140/253430/8446/9731/283635/411/256364/85414/256329/23014/23558/124491/57175/79188/5868/5062/100506860/7392/5973/56674/2664/58515/1389/9909/2313/57446/57326/201176/23218/22864/23526/55367/5594/55858/23396/84905/51185/1445/55852/5330/8887/26469/9612/9854/93129/4335/7454/23196/83931/5527/23338/5611/94056/3705/6778/6892/115727/7…
EHMT1	237	0.265971	0.768707	1	1	1510	tags=40%, list=27%, signal=31%	55536/9781/5588/158405/4507/51768/1953/142/57546/55342/6894/197358/489/166647/26086/23598/22869/399687/7468/10514/101929147/1021/64794/84939/55764/2618/8568/6621/23301/7029/285349/23132/57521/25888/152185/27130/8924/63910/26751/54496/29985/253769/64434/5832/9277/23178/7343/11128/57496/9875/25929/90861/124454/7753/84914/56342/9894/84899/56339/10585/51434/23076/57147/84172/64210/55755/6693/10300/62…
HMBOX1	221	-0.225426	-0.460499	1	1	491	tags=2%, list=9%, signal=2%	23064/7402/10577/6277/7305
ZNF623	215	-0.145848	-0.299062	1	1	2102	tags=30%, list=38%, signal=19%	9895/9896/55217/8943/29990/695/79591/4967/4087/9095/6619/79684/9924/414/83605/197258/1845/55252/54838/29767/8417/4905/54884/23272/51135/55717/80208/143/150465/79810/3551/23030/5934/11215/23250/5925/3631/9731/121274/79188/5062/57798/11311/1389/9909/2313/57326/200014/5594/55858/10209/53840/55852/10384/114826/4261/23338/219931/63901/6778/11329/4126/162989/92241
MSANTD4	235	0.226946	0.664608	1	1	1300	tags=26%, list=23%, signal=20%	5567/7311/10198/9793/55215/160897/5471/7733/1736/57181/28981/11169/22869/81856/79649/3998/134637/55127/26354/285349/339324/57650/163050/55835/11198/163087/79744/80173/100287765/1653/7570/7705/26263/55728/10314/81931/11128/56898/90338/10146/25929/7675/79088/10240/2967/51626/51434/27085/57147/55132/84172/51134/55755/9933/57534/29966/4436/23173/10795/23279
CCDC17	375	0.178363	0.515027	1	1	517	tags=5%, list=9%, signal=5%	6633/746/84326/26517/6421/90480/154467/5757/84300/78988/100131187/27089/4637/521/517/516/55651/10169/140823/51253
MDM4	474	-0.251568	-0.523253	1	1	1459	tags=15%, list=26%, signal=12%	400916/143384/29115/55599/5223/5771/142891/54882/51362/4055/9159/10658/80219/23670/23451/57404/10087/23075/23014/9648/118813/124491/23405/167153/826/26523/951/221037/167227/9583/226/26137/100505576/1540/1105/51185/23438/8887/64397/91526/6093/440400/7454/4179/55088/8774/5495/83442/79670/27166/26286/51230/23528/6688/6249/9101/5966/63940/2771/23064/84458/5500/150864/7402/6574/4193/6867/221178/6430/2…
ZNF589	170	0.22244	0.600069	1	1	1307	tags=32%, list=23%, signal=25%	55536/7311/54865/286467/4507/10198/57546/6894/101929147/84140/100129387/64794/134637/84939/2618/161779/23301/285349/152185/55120/10325/55556/26751/54496/253769/84083/145508/11128/57496/25929/11232/7675/124454/7753/84914/60526/84899/56339/10585/51434/84942/5378/84172/400506/51134/55755/6293/55063/84064/101060200/4436/254042/23279/79828
ZNF814	320	-0.264453	-0.544381	1	1	726	tags=6%, list=13%, signal=5%	151556/6892/7320/91544/6688/55967/63940/2771/84458/55508/55122/4193/2124/23406/54964/25946/25798/9445/2907
ZNF808	304	0.207663	0.586819	1	1	843	tags=12%, list=15%, signal=11%	4282/25873/6748/6421/9767/10198/521/80097/517/220988/1072/10169/140823/166647/3187/514/22869/7468/7188/57343/1021/7158/54539/64794/1175/55127/55764/7693/285349/23132/7514/84747/152185/27130/339324/23236/163087
ZNF92	479	-0.164607	-0.342155	1	1	1183	tags=18%, list=21%, signal=15%	55773/22919/57589/54878/7716/3839/5586/3572/9213/6655/9728/373156/996/153241/51727/122525/324/84248/22931/5828/9380/6670/23253/9541/10250/3845/9847/54882/51362/80219/2631/23451/9218/9648/29066/167153/5868/22890/219333/9107/55233/1192/167227/64860/10434/226/1540/51119/23473/84967/1105/10499/27125/51014/50640/10150/51100/6093/11179/55914/54790/830/5932/5412/57515/3421/55088/8774/23527/9451/571/1030…
ZNF41	335	0.136633	0.392182	1	1	1451	tags=26%, list=26%, signal=20%	5336/4602/135293/4507/10198/6209/55342/5311/6894/160897/9735/22869/79598/143888/10644/1021/3181/64794/6621/23301/26354/25888/7514/152185/27130/10325/672/54914/55622/1479/79895/27340/26751/5558/253769/64434/53615/7705/55813/145508/11128/57496/9875/25929/90861/7753/60526/84899/2967/51626/64921/54919/5378/57147/8518/84172/1122/64770/91749/7023/6293/57534/101060200/4436/23279/79828/4076/10128/26013/6…
NSD1	263	0.321713	0.925449	1	1	473	tags=9%, list=8%, signal=9%	6181/5336/6168/6137/25873/6169/6167/6160/6205/7311/6230/6227/6161/6155/23480/4507/6158/10198/3094/80097/142/643699/6894/6141
ZNF613	152	0.235859	0.634405	1	1	1445	tags=26%, list=26%, signal=20%	64116/9767/9793/160897/7733/11169/22869/81856/57343/7029/285349/339324/163050/163087/79744/55726/1653/7705/81931/56898/90338/25929/51427/706/27085/57147/55132/1763/284309/57534/10795/9657/7743/55326/9668/55591/56916/65250/154007/22862
ZNF577	369	-0.285899	-0.597493	1	1	338	tags=2%, list=6%, signal=2%	5728/6430/23406/6277/7305/1471/25798/6281
ZNF75A	373	-0.197796	-0.413226	1	1	610	tags=3%, list=11%, signal=3%	6688/9101/63940/2771/84458/150864/79180/5728/137886/148022/23406/7305/1471
ETV6	193	0.245508	0.682273	1	1	860	tags=11%, list=15%, signal=10%	55784/9331/154467/158405/9767/27089/4637/5311/10169/166647/26086/514/7188/1021/7158/1175/23132/57521/55176/27130/23236/79969
ZFP90	313	0.158938	0.472157	1	1	1451	tags=24%, list=26%, signal=19%	5567/9767/4507/10198/6209/55342/5311/6894/160897/9735/57181/28981/22869/79598/1021/3998/57539/23301/26354/285349/7514/152185/11168/27130/339324/401251/1479/27340/26751/54465/7705/55728/10314/11128/90338/57496/25929/7753/50808/60526/84899/51626/64921/51434/5378/144245/57147/55132/8518/84172/1122/64770/6293/57534/4436/23173/23279/4076/10128/9657/26013/7743/8672/6426/150759/64582/80267/56916/65250/2…
MYPOP	364	-0.281207	-0.586232	1	1	1459	tags=21%, list=26%, signal=16%	400916/143384/29115/1455/23250/5925/160/4055/11078/57140/5018/8446/283635/10087/256329/23558/81622/5062/100506860/7392/9404/2664/58515/29998/9909/201176/4629/951/55858/945/23396/7077/1209/84905/3663/1445/5330/8887/5912/26469/9612/9854/93129/7454/23196/55969/5452/5611/154881/94056/7016/3705/6778/27166/6892/115727/23654/7320/91544/23528/340527/6688/7430/63940/2771/6945/84458/1200/5500/4193/80762/12…
ZBTB10	225	0.211918	0.589597	1	1	491	tags=6%, list=9%, signal=5%	3178/56479/6421/51307/84300/55159/9767/78988/521/7561/10576/10169/55432
BRD8	411	-0.269148	-0.561256	1	1	701	tags=4%, list=13%, signal=4%	27166/26286/2014/6688/9101/63940/2771/84458/1396/440836/148022/968/23406/7940/7305/1471/25798/6281
LMNB1	275	0.274998	0.767149	1	1	453	tags=8%, list=8%, signal=8%	7298/1869/5336/4171/4173/4678/9349/6941/3182/10360/8607/4174/6164/10785/2189/8318/23170/993/11007/4796/8704/2305
TERF2	165	-0.280084	-0.56768	1	1	1499	tags=16%, list=27%, signal=12%	867/22879/80271/1455/2987/23053/256364/170394/10159/58515/80727/200014/5594/5048/6811/222658/27245/23338/5170/7016/60685/55967/9709/57217/54926/114769
ZBTB14	267	-0.153097	-0.316045	1	1	1953	tags=26%, list=35%, signal=18%	79684/220906/8450/9879/197258/55252/201627/113612/51780/57577/104355295/57645/23033/23272/6815/8648/3717/22794/51135/55717/66036/80208/22821/5253/821/9296/143/153241/51727/50809/122525/29945/79691/253461/9950/100505641/5934/10114/11215/9706/151636/9847/5925/3631/2631/121274/5062/57654/22890/88455/140609/1192/51199/5965/9926/1519/10499/53840/79815/9991/2746/55914/5412/23338/23527/196527/3716/22165…
TBX19	79	-0.173918	-0.334804	1	1	2227	tags=42%, list=40%, signal=25%	64429/57688/22900/27236/84343/23382/81847/10559/18/55217/219402/4087/6619/79684/55252/54838/8417/4905/23272/51135/51478/80208/3551/253430/9731/5062/11311/2313/55858/53840/6773/6778/11329
ACTR5	384	-0.200876	-0.415803	1	1	405	tags=4%, list=7%, signal=4%	23338/51343/4650/10106/1453/8844/55967/80273/9114/2512/11261/114769/6282/1508
SMARCC2	265	-0.298278	-0.613568	1	1	261	tags=3%, list=5%, signal=3%	51274/7321/2495/25798/8676/9445/3460
MECP2	352	-0.235937	-0.488701	1	1	1904	tags=27%, list=34%, signal=19%	6667/55667/3964/1657/254065/5306/9990/23429/51780/9665/7109/55593/2332/23347/23033/285512/6482/54870/6868/55773/9870/8816/54878/164/5586/201475/6655/9728/373156/55692/11044/26190/23253/2787/4289/1314/63916/5130/142891/54882/9159/7994/23053/118813/29066/23405/200186/9320/8408/10095/5609/23258/9583/26959/226/10725/100505576/1540/29110/5048/23473/5894/158830/10499/27125/50618/60436/6275/10746/57471/…
RFX3	202	0.232573	0.626317	1	1	1046	tags=19%, list=19%, signal=16%	6748/56479/5588/9331/9767/10198/55342/5311/6894/10576/166647/9735/57181/3187/28981/22869/1021/64794/134637/2887/23301/285349/152185/27130/55752/55843/6558/23236/54914/27340/26751/253769/636/84083/145508/57496/5411/7006/7675
FXR2	296	-0.23809	-0.486483	1	1	1473	tags=16%, list=26%, signal=12%	80271/5089/1455/25994/9550/23053/11021/51643/256364/2011/5970/285550/1743/2664/10159/58515/5609/200014/5252/5048/6811/1209/267/55810/119392/9854/119504/27245/7030/51343/4650/5170/7016/10106/1453/8897/6892/114789/6451/7320/5045/60685/55967/57217/1912/5538/114769
MSL3	423	-0.239918	-0.500156	1	1	1847	tags=26%, list=33%, signal=19%	23214/57577/8417/9665/4124/2332/51317/79663/23347/51439/23033/4905/285512/23272/6815/8648/3717/27436/57589/23161/54878/51135/55717/80208/5586/3572/6655/25801/153241/8867/8674/29945/324/26234/9950/6670/100505641/23253/5934/6814/153339/7096/23325/5130/10114/58533/8850/11215/55599/57035/9847/51131/54882/91351/23451/9648/4214/29066/23405/167153/22890/9320/54103/51167/140609/55233/1192/167227/51199/95…
ZNF596	201	0.244574	0.721505	1	1	1113	tags=24%, list=20%, signal=20%	23412/10198/400986/4331/160897/5984/80321/254013/57181/7979/151246/113174/28981/11169/54069/81856/79649/84140/100129387/51602/134637/375248/10455/80227/23301/285349/55120/11168/163087/57489/80173/26751/54465/100287765/1653/7570/7705/64417/57730/55728/11128/56898/57496/10146/7675/57587/10240/28977/10585
SLC2A4RG	216	-0.255669	-0.523063	1	1	991	tags=12%, list=18%, signal=10%	8887/5912/9612/93129/7454/23196/2117/5611/154881/94056/3705/79670/27166/7320/51230/255394/9101/2771/84458/1200/5500/10801/6303/8514/54964
ZBTB11	405	-0.216078	-0.451794	1	1	1183	tags=10%, list=21%, signal=9%	9107/1192/221037/167227/51199/26959/226/10725/51119/23473/84967/1105/10499/27125/50618/50640/10150/51100/6093/440400/90268/54790/4179/6016/3421/8774/23527/9451/571/9144/83442/160760/51322/9975/10672/23064/56261/2512/6430/7763/7150
CSRNP2	242	0.170026	0.481564	1	1	810	tags=9%, list=15%, signal=8%	4602/5588/9331/158405/104472715/9767/521/160897/10169/140823/489/166647/23598/22869/79598/1021/6621/57521/7514/27130/57605
ZNF337	477	-0.255529	-0.531317	1	1	178	tags=1%, list=3%, signal=1%	2512/6277/6282/2207
ZNF226	286	-0.253696	-0.527666	1	1	610	tags=3%, list=11%, signal=3%	6688/63940/2771/79180/148022/23406/7305/1471/25798
ZNF765	346	0.183755	0.535963	1	1	1334	tags=26%, list=24%, signal=21%	64116/79915/262/55159/9767/10198/7561/9793/7486/55215/83990/160897/10576/7738/5471/7733/51018/113174/11169/22869/81856/64395/79598/57343/65062/3998/25926/55659/55127/23301/7693/26354/25888/11168/339324/163050/163087/6875/57489/342892/27340/5955/1964/11052/54465/142940/1653/7705/10733/55728/10314/23270/90338/57496/10146/7675/51430/90407/25897/28977/26230/7247/64921/51427/706/284391/10424/56061/306…
EEA1	259	-0.246697	-0.509328	1	1	1769	tags=25%, list=32%, signal=18%	23272/10890/6815/3717/56267/11212/64407/23161/51135/80208/821/8674/50809/79810/29945/2665/55325/9950/5934/6814/51809/23325/60682/9317/11215/54737/5925/253430/444/10955/54103/11311/1389/51167/2313/140609/64343/5965/64747/132320/53840/10384/3454/28962/119392/11179/128338/11342/1102/63901/6643/7813/6451/8826/128866/10788/2710/11329/55646/120/5728/137886/2533/834/9750
ATF1	116	-0.218788	-0.431958	1	1	1932	tags=30%, list=35%, signal=20%	8450/9879/55252/8417/23476/4905/23272/10890/6815/8648/3717/56267/23161/51135/51727/8674/51510/9950/6814/10114/5925/253430/5062/1389/140609/1192/5594/55858/3987/28962/9991/11179/2182/196527/5906
ZNF35	310	-0.21043	-0.434918	1	1	1772	tags=18%, list=32%, signal=13%	84085/130074/80209/221079/22794/9450/54870/22919/9870/57589/164/55717/7716/3839/5586/9213/8702/9728/5828/27351/79691/6670/54882/26524/7994/23451/7046/118813/219333/9320/55233/64860/26959/10725/57085/1540/1105/10499/27125/222658/51100/90268/57515/5495/9451/571/160760/51322/10287/10672/4790/169200/128346/7940/7305
ZSCAN30	225	0.257668	0.736571	1	1	1473	tags=48%, list=26%, signal=37%	55536/7311/54865/286467/4507/10198/51768/142/55342/6894/29902/166647/9735/57181/54517/28981/54058/101929147/23468/84140/100129387/64794/134637/84939/55127/55764/2618/161779/23301/285349/152185/55120/27130/55752/10325/8924/55835/672/54914/8502/55556/55622/1479/27340/80173/26751/54496/253769/5832/100287765/26263/84083/145508/401207/11128/57496/9875/25929/7006/11232/7675/124454/7753/84914/57494/6052…
ZNF841	122	-0.2167	-0.429887	1	1	2339	tags=44%, list=42%, signal=26%	8737/10565/57720/23293/23140/9736/27291/9778/374986/80821/23122/23774/58508/55727/374879/8916/253959/80351/23339/64145/23637/54834/9043/8239/23041/9520/2074/9962/54520/55667/254065/54877/51780/9665/23347/23033/285512/9870/164/66036/8702/26190/4289/5130/4204/9847/54882/118813/9320/23473/50618/10475/256356/23064
SNAPC5	94	0.207057	0.522293	1	1	1129	tags=26%, list=20%, signal=21%	54865/10436/3727/29893/84296/254013/60509/283104/58477/2778/2618/80227/51491/100132774/100506649/23065/55813/26263/11128/245812/246243/2967/56339/84942
ZNF845	399	0.144106	0.435755	1	1	992	tags=11%, list=18%, signal=9%	3178/57045/64116/195828/6421/262/55159/9767/78988/283489/4637/7561/7486/10169/55432/7733/51018/22869/64216/79598/9263/57343/65986/25926/55659/7693/339324/163087/6875/79744/342892/27340/5955/1964/11052/54465/139886/142940/1653/10733/55728/10314
THAP5	308	-0.153293	-0.317836	1	1	1612	tags=17%, list=29%, signal=12%	8674/50809/79810/29945/51510/55325/9950/23253/5934/6814/23325/60682/9317/58533/54737/55599/25994/977/57404/9648/10955/81609/826/51167/55700/64343/339487/51125/5965/27071/132320/8887/3454/119392/830/55969/11342/5527/5878/63901/285381/6643/7813/151556/7320/128866/2710/10200/120/5728/137886
ZNF696	159	0.248661	0.674369	1	1	1273	tags=30%, list=23%, signal=24%	5336/8607/4507/10785/2189/4796/113655/399687/7468/10514/10471/64794/80233/84939/79724/8568/6621/57521/29920/8924/201255/115950/116840/54496/253769/64434/9277/53615/7343/2068/1174/11128/9875/25929/90861/124454/7753/10598/9894/54919/78992/64210/705/91433/622/91749/6693/6293
ZNF540	92	-0.235288	-0.464797	1	1	1459	tags=15%, list=26%, signal=11%	400916/5223/9159/23670/133746/23014/826/80213/26137/2117/8774/151556/6688/23406
PHF21A	345	0.209878	0.615229	1	1	484	tags=6%, list=9%, signal=6%	11224/6136/6748/6633/10591/746/26517/90480/9349/6147/9767/27089/4637/6208/6164/521/6209/516/55651/6187/10169/140823
CBX3	325	0.274146	0.787806	1	1	992	tags=14%, list=18%, signal=13%	5567/6136/79682/3178/6157/195828/3146/4673/10360/262/10198/10635/7272/6209/83990/6187/160897/10576/7733/51018/85444/151246/113174/1937/3150/79598/3998/25926/26354/51491/26135/7514/11168/339324/3161/100132774/5955/55726/1964/54465/5558/139886/142940/1653/10733/55728/10314
ZNF624	414	-0.133928	-0.279982	1	1	1818	tags=21%, list=33%, signal=15%	7799/2332/23347/51439/6881/84085/80209/221079/22794/54870/55773/22919/56900/57589/54878/164/55717/7716/3839/5586/3572/9213/6655/8702/9728/153241/51727/122525/324/84248/22931/5828/79691/6670/9541/4289/58533/3845/11215/9847/142891/54882/51362/7994/2631/23451/7046/9648/29066/167153/5868/253832/22890/219333/9748/9107/55233/285966/64860/26959/226/1540/23473/1105/10499/27125/51100/6093/55914/4238/54790…
SNAPC4	316	0.256489	0.755863	1	1	960	tags=18%, list=17%, signal=16%	5336/6666/4171/4602/9781/6300/3182/7915/4507/1663/1953/2189/23170/4796/643699/6894/8831/197358/489/166647/9196/23598/79711/113655/22869/399687/7468/10514/64794/80233/284403/79724/55764/8568/6487/57521/401251/29901/29920/9401/8924/201255/115950/116840/90378/2194/284001/54496/29985/253769/10155/64434/23178/53615/7343/2068
ZNF180	376	-0.196855	-0.40956	1	1	1806	tags=19%, list=32%, signal=14%	2332/23347/23033/6881/84085/23272/80209/221079/22794/54870/57589/23161/54878/55717/7716/66036/3839/5586/9213/6655/9728/153241/122525/324/84248/5828/79691/9950/6670/100505641/4289/3845/11215/9847/6309/54882/2631/23451/7046/29066/167153/22890/9748/9107/55233/1192/64860/5965/226/1540/23473/10499/10746/51100/55914/4238/54790/5932/5412/57515/55088/23527/571/10308/51322/114882/4780/9101/9975/23064/7086…
ZSCAN5A	359	0.291158	0.82533	1	1	989	tags=26%, list=18%, signal=23%	9315/402/66005/4830/204/6182/79077/2653/79001/5425/2193/54865/26517/6941/7374/3182/5902/4172/8607/254552/84300/284184/51154/4507/8673/10785/84284/55695/349565/23170/51258/28958/1854/4796/57418/8655/64098/29902/4521/25886/8479/79621/471/65993/8574/113655/55847/1019/26292/83596/64110/100188893/5693/594/55759/54903/10969/81873/1468/80233/84939/51021/8568/10061/1312/5860/10966/29901/29920/51065/10901…
ZNF823	237	-0.254468	-0.520954	1	1	1596	tags=14%, list=29%, signal=10%	324/84248/5828/27351/23253/9541/4289/6498/58533/23451/9648/81622/167153/5868/826/9748/64860/1540/1105/51185/26469/6093/7454/5932/8774/23471/9101/4542/84458/5500/6813/1522/7305
ZNF701	194	0.232851	0.642006	1	1	1092	tags=21%, list=20%, signal=17%	7311/79915/10198/163732/9793/55215/160897/5471/5984/7733/151246/11169/22869/81856/64395/23468/285349/55120/11168/339324/57650/163050/11198/163087/57489/80173/100287765/1653/7705/64417/55728/6150/81931/11128/56898/90338/10146/7675/79088/10240
ZNF248	188	0.265799	0.710774	1	1	1307	tags=45%, list=23%, signal=36%	84319/54865/64105/4172/286467/4507/10198/79723/4331/55342/160897/8706/84937/29902/80321/57181/137682/28981/54058/23421/594/101929147/23468/84140/55759/54903/100129387/134637/84939/375248/10455/2618/161779/196294/80227/23301/285349/55750/152185/55120/10325/55843/55835/1479/23635/80173/26751/54496/100129858/100287765/7705/64417/26263/84083/401207/11128/57496/10528/10146/25929/11232/7675/7753/60526/…
KCMF1	454	-0.282165	-0.588743	1	1	1107	tags=14%, list=20%, signal=12%	57085/5252/29110/5048/5894/27125/170954/51014/267/55810/400569/51100/401548/136319/51411/85007/90268/119504/10318/127829/7030/51343/5495/734/9451/10106/1453/8897/160760/51322/114789/51762/5045/51696/54434/60685/9051/23673/79567/90427/10672/10019/55646/9267/85464/4790/3720/9444/7048/752/55625/1912/114294/8202/79627/9846/2872/51274/5971/2683/4791/114769/4067/602
PRDM4	441	-0.195079	-0.407288	1	1	1319	tags=14%, list=24%, signal=11%	4214/29066/253832/388753/22890/219333/9320/24149/57617/88455/55233/285966/9583/26959/10725/57085/5048/23473/5894/10499/27125/222658/51014/267/55810/51100/401548/55914/4238/90268/2889/9341/5412/147179/80853/57515/3421/23338/1408/5170/9451/571/3267/160760/51322/114882/84888/51696/3716/9975/10672/55967/23064/7048/23268/8030/6867/8202/8301/10892
ZNF302	355	0.156072	0.460238	1	1	1308	tags=22%, list=23%, signal=18%	5567/3146/79915/10198/55342/160897/7738/5471/51018/80321/57181/7979/151246/113174/28981/11169/81856/64395/79649/84140/51602/3998/25926/134637/23301/285349/55120/11168/339324/10325/55843/55835/163087/57489/1479/80173/55726/1964/26751/54465/100287765/1653/7570/7705/64417/55728/6150/81931/11128/56898/90338/57496/10146/7675/57587/57494/10240/28977/51626/64921/51434/5378/3066/55132/55345/1763/51134/64…
ZSCAN32	193	-0.244901	-0.495243	1	1	56	tags=19%, list=1%, signal=20%	9870/8816/54878/55717/66036/5586/8702/9728/153241/324/84248/5828/79691/9950/100505641/4289/4204/9847/6309/54882/23075/118813/197320/9320/9748/91445/64860/5048/23473/222658/60436/6275/4238/51088/5495/5663/5199
ZNF600	327	-0.131924	-0.272799	1	1	1526	tags=11%, list=27%, signal=9%	23253/6814/4289/23325/58533/11215/55599/57035/9847/51131/54882/23451/9648/23405/167153/826/64343/167227/64860/5965/226/23473/51185/50618/6093/11179/54790/5932/4179/8774/23527/9101/4683/3516/5728/6430/7305
YY2	274	0.246763	0.720287	1	1	1308	tags=30%, list=23%, signal=24%	6181/3070/7311/79915/54941/6158/10198/163732/9793/7486/5927/1072/5471/51018/1736/57181/113174/11169/81856/64395/124540/23468/100129387/375449/134637/55127/375248/10081/285349/5216/55120/11168/163050/11198/163087/94081/57489/27340/80173/100287765/1653/64417/6217/55728/6150/10314/11128/56898/90338/57496/10146/25929/11232/7675/246243/79088/84914/56339/7247/10585/51434/10772/84942/23076/22995/27085/5…
ZNF341	287	0.176021	0.49248	1	1	995	tags=16%, list=18%, signal=14%	5336/6300/7374/3182/8607/10785/6723/23170/11007/4796/8704/8655/8831/64098/23598/8574/79711/113655/399687/10514/10471/80233/79724/8568/6621/90956/6487/10189/57521/29901/29920/9401/201255/115950/5827/90378/2194/54496/253769/10155/64434/53615/7343/2068/26094/1174/140680
E2F6	42	0.151547	0.342081	1	1	1089	tags=17%, list=19%, signal=14%	57546/126299/7158/23132/100506436/84914/56342
PHF2	443	-0.265092	-0.552605	1	1	1689	tags=26%, list=30%, signal=19%	132160/51135/55717/23385/64759/5204/80208/22821/55048/9138/51564/25777/143/153241/150465/55568/6874/3551/5585/89846/23030/4700/5720/100505641/23616/867/84247/124997/5089/9706/1455/23250/3654/160/54776/3631/3340/11078/7297/57140/23053/411/256364/2011/5062/7392/57654/9320/2664/170394/58515/24149/80727/9909/88455/57326/201176/23218/23526/200014/51199/55367/5594/55858/23396/9926/113/1519/1445/55810/9…
THRA	454	-0.284912	-0.600211	1	1	1430	tags=20%, list=26%, signal=17%	23250/25994/160/54776/3340/11078/9550/7297/57140/23053/8446/64928/283635/51643/57404/256364/23014/2011/140739/388753/100506860/7392/1743/2664/115992/10159/58515/29998/24149/9909/55700/55362/201176/23218/23526/200014/84254/5252/51092/6811/1209/170954/1445/55810/8887/9612/119392/9854/4335/2889/23196/4627/55969/1729/51043/5527/23338/127829/7030/4650/83985/94056/91373/5170/7016/2870/10106/3705/6892/2…
ZNF493	435	-0.287612	-0.598418	1	1	837	tags=6%, list=15%, signal=6%	127829/55088/8774/7076/5878/10903/27166/2014/6688/128866/9101/63940/2771/1396/4683/440836/5728/6813/137886/6430/968/1522/665/23406/7305/1471/6281
ZNF189	190	0.228363	0.658956	1	1	1561	tags=29%, list=28%, signal=22%	4602/9767/4507/10198/5311/6894/514/22869/1021/64794/57539/26354/285349/25888/7514/152185/27130/339324/27340/7705/26263/81931/90338/25929/7006/7753/51626/64921/57147/8518/1122/64770/91749/57534/101060200/23279/4076/26013/8672/6426/150759/80267/56916/65250/154007/5921/22862/54497/340481/9202/7155/134957/23195/81545/4686/26512
ZNF678	285	0.278086	0.812058	1	1	1325	tags=35%, list=24%, signal=28%	5567/64116/3146/4175/9767/10198/79723/9793/83990/55342/160897/10576/7738/7733/51018/80321/57181/151246/113174/28981/11169/22869/64395/79598/79649/1021/65062/3998/25926/134637/55127/57539/23301/285349/25888/7514/152185/55120/11168/339324/55843/163087/79744/57489/27340/80173/5955/55726/11052/54465/699/142940/1653/7705/10733/55728/84083/10314/81931/11128/56898/90338/57496/10146/25929/7675/50808/1024…
HINFP	109	0.24562	0.623233	1	1	1501	tags=45%, list=27%, signal=34%	2193/54865/84284/28958/84937/29902/8479/254013/55152/54903/84939/2618/196294/10081/80227/55120/55835/10963/81890/9277/55813/51023/26263/11128/10528/11232/10240/728568/56339/10585/90529/51434/84942/2639/80755/400506/79064/29966/64969/1678/101927597/27229/617/14/26275/9093/63931/29087/199704
TBP	259	-0.269961	-0.555652	1	1	682	tags=5%, list=12%, signal=4%	23471/7320/128866/9101/2316/84458/5500/476/5728/1522/6993/79026
ZNF649	439	-0.18783	-0.393744	1	1	1904	tags=22%, list=34%, signal=16%	6667/55667/3964/1657/201627/254065/9867/55030/51780/9665/104355295/57645/2332/23347/23033/84085/130074/22794/54870/9870/8816/57589/23161/54878/164/55717/7716/3839/5586/9213/6655/8702/9728/153241/122525/84248/11044/5828/79691/9950/6670/100505641/6814/2787/4289/1314/4204/11215/9847/6309/54882/7994/23451/7046/118813/29066/23405/167153/253832/219333/9320/6237/9748/10095/55233/64860/51199/26959/226/10…
LCORL	325	-0.24503	-0.506903	1	1	1221	tags=11%, list=22%, signal=9%	51167/9748/64343/167227/5965/132320/23473/51185/6733/8887/3454/9991/6093/11179/55914/54790/830/5932/4179/11342/9765/55088/23527/63901/6643/3688/26286/6249/9101/23064/4683/7402/3516/120/5728/137886/5788
ZFP69	208	-0.163342	-0.334137	1	1	1682	tags=22%, list=30%, signal=16%	51135/55717/80208/5253/821/143/153241/150465/6874/3551/51703/5934/11215/9706/29115/23250/5925/3631/253430/91351/9731/5062/11311/24149/1389/9909/2313/88455/140609/55858/113/53840/79815/55852/10384/28962/2746/23196/90637/151742/196527/401494/11329/221656/92241
NR2C2	267	-0.213054	-0.441334	1	1	2013	tags=23%, list=36%, signal=15%	11176/2074/9962/2073/54520/6400/6667/2145/55667/1657/254065/9990/51780/9665/23347/23033/285512/6482/22926/6868/9870/8816/55717/84449/5586/23303/201475/143/55692/11044/26190/2787/4289/1314/5130/4204/54882/7994/10658/118813/23405/9320/26523/51199/9583/5048/5894/50618/6275/23438/10475/51088/9765/8897/843/79670/5663/6249/54625/23064/7402
MGA	232	0.253799	0.722366	1	1	1494	tags=37%, list=27%, signal=28%	158405/9767/4507/10198/9793/57546/55342/6894/10576/166647/9735/57181/3187/514/22869/101929147/1021/7158/64794/55127/55764/161779/23301/26354/285349/23132/25888/152185/55120/27130/8924/55835/27340/26751/253769/100287765/84083/145508/11128/1652/57496/9875/10146/25929/7006/11232/7675/7753/84914/84899/51434/27085/57147/8518/84172/51134/64770/55755/91749/57534/101060200/23173/23279/26013/7743/10012873…
MTERF4	142	-0.177788	-0.356651	1	1	375	tags=15%, list=7%, signal=14%	55717/84449/66036/80208/143/79810/55692/100289019/79691/2787/55599/9159/118813/121274/23177/256987/23438/440400/4238/7402/25798
ZFP1	357	-0.210705	-0.43687	1	1	1781	tags=19%, list=32%, signal=14%	6881/84085/80209/221079/22794/54870/55773/22919/57589/54878/7716/3839/5586/3572/9213/6655/9728/373156/153241/51727/122525/324/84248/5828/79691/6670/58533/3845/142891/7994/2631/23451/7046/167153/253832/22890/219333/2553/9748/10095/9107/55233/64860/26959/10434/226/10725/57085/1540/23473/84967/27125/51100/55914/5412/57515/5495/23527/9451/571/51322/114882/51762/10672/169200/7305/5199
CHAMP1	266	0.175422	0.511738	1	1	764	tags=11%, list=14%, signal=10%	4605/195828/746/9349/6147/9767/4637/400986/6164/521/993/2305/10169/7733/254013/92935/23598/22869/9538/3150/79598/6152/751071/143888/284403/5191/55659/51079/26986
ZNF575	205	-0.222597	-0.454982	1	1	1183	tags=13%, list=21%, signal=10%	9107/4629/1192/91860/7786/90203/51292/51014/10150/51100/85007/57515/3421/23527/7439/51322/8780/114882/51762/91544/55788/9444/9958/23307/3516/54964
ZNF615	378	-0.25658	-0.52932	1	1	1806	tags=23%, list=32%, signal=17%	2332/23347/51439/6881/84085/80209/221079/22794/54870/55773/57589/164/7716/3839/5586/9213/6655/9728/373156/153241/8867/122525/324/84248/5828/79691/6670/4289/79572/3845/51582/9847/6309/142891/54882/7994/2631/23451/7046/29066/167153/253832/22890/219333/9320/9748/10095/9107/55233/64860/26959/226/10725/1540/23473/1105/10499/27125/50618/51014/55810/10746/51100/6093/55914/4238/5412/57515/3421/55088/5495…
ZBTB6	307	-0.289634	-0.604822	1	1	1901	tags=28%, list=34%, signal=20%	55667/3964/2874/1657/201627/254065/9867/23429/2332/23347/6881/84085/80209/221079/22794/56900/57589/23161/7716/3839/5586/9213/6655/9728/153241/51727/8867/122525/5828/79691/6670/6814/7096/79572/10114/3845/11215/51582/9847/6309/2631/23451/7046/4214/29066/23405/167153/253832/22890/219333/9320/9107/55233/26959/10499/51014/10150/10746/51100/9991/11179/55914/4238/54790/5412/57515/3421/2182/5495/23527/57…
ZMAT1	110	0.227314	0.582093	1	1	1618	tags=45%, list=29%, signal=32%	4507/10198/5311/6894/9735/57181/3187/79598/1021/134637/23301/7514/152185/27130/401251/27340/26751/253769/5411/84899/64921/5378/8518/1122/64770/57534/23173/254042/23279/10128/26013/150759/64582/56916/5921/22862/80184/54497/340481/9202/5422/58487/4686/9678/54585/84131/27336/116064/9913
MTERF1	324	-0.146671	-0.304077	1	1	1691	tags=17%, list=30%, signal=13%	23161/54878/51135/55717/66036/5586/153241/8674/122525/29945/324/84248/5828/79691/253461/9950/100505641/23253/6814/153339/9541/4289/23325/58533/11215/55599/9847/50862/23451/9648/167153/22890/51167/9748/1192/64860/5965/226/23473/6093/55914/4238/54790/830/5932/4179/57515/55088/23527/10308/114882/9101/23064/4683/137886
ZNF45	420	-0.137366	-0.284337	1	1	1702	tags=17%, list=30%, signal=13%	51780/9665/7109/57645/2332/23347/23033/285512/23272/80209/8648/22794/9870/57589/23161/54878/51135/55717/66036/3839/5586/9213/6655/9728/373156/153241/324/5828/9950/6670/100505641/2787/4289/10114/11215/151636/9847/54882/23451/118813/29066/23405/167153/22890/9320/140609/64860/51199/9583/226/5048/23473/10499/50618/222658/6275/51100/9991/55914/4238/54790/57515/51088/23527/83442/51322/114882/9975/54625…
AKAP8	190	-0.213127	-0.434437	1	1	1600	tags=14%, list=29%, signal=10%	55692/324/51128/79691/23253/10250/143384/29115/142891/9159/80219/23670/57404/23014/118813/124491/79939/100505576/1540/23473/64397/8774/6249/9975/84458/150864/6867
ZNF277	179	0.251744	0.639626	1	1	252	tags=3%, list=5%, signal=3%	5567/3178/65008/3146/4673/262
ZNF213	222	-0.224068	-0.459142	1	1	1413	tags=17%, list=25%, signal=13%	160/4055/10755/11078/57140/9731/23558/57175/79188/5062/7392/5973/58515/1389/9909/57446/55858/23396/1105/84905/1445/55852/26469/93129/7454/23196/92799/51526/5611/94056/3705/6778/115727/7094/378805/92241/6404
ZNF275	301	0.208348	0.588533	1	1	919	tags=10%, list=16%, signal=9%	746/6421/154467/158405/84300/55159/9767/283489/4637/10169/140823/10389/7733/23598/514/22869/91283/57343/1175/55659/55127/7693/23132/55176/84747/79744/85364/27340/5955/11052
CREB1	338	0.261928	0.781812	1	1	1300	tags=24%, list=23%, signal=20%	5567/4602/6136/65008/6176/3146/10198/79723/55342/5311/160897/10576/51018/85444/9735/57181/3187/151246/113174/28981/11169/22869/64395/79598/79649/84140/1021/3998/25926/134637/23301/26354/26135/7514/152185/11168/10325/55843/672/55622/57489/27340/55726/1964/26751/54465/5558/699/142940/1653/7705/55728/84083/10314/57496/10146/25929/7753/60526/28977/7247/64921/51434/5378/9987/3066/55132/8518/84172/5534…
RNF20	298	0.267386	0.766993	1	1	1452	tags=35%, list=26%, signal=28%	65008/6167/7311/54865/64105/4172/4175/4507/6158/10198/79723/9793/55215/160897/5984/10606/85444/9735/57181/151246/113174/28981/11169/23421/64395/79598/79649/84140/55759/54903/3181/5557/3998/134637/2618/23301/26354/26135/152185/55120/10325/55843/55835/11198/672/55622/1479/27340/80173/26751/5558/699/51474/1653/7705/55813/6217/84083/145508/11128/57496/10146/25929/7753/60526/10240/2967/51626/51434/537…
ZNF354A	200	0.172989	0.496335	1	1	645	tags=6%, list=12%, signal=5%	5567/4602/3146/10198/55342/160897/7738/151246/22869/64395/79598
ZNF319	316	-0.244554	-0.505689	1	1	1398	tags=19%, list=25%, signal=15%	3340/26524/57140/23053/6455/11021/64928/51643/256364/5970/285550/388753/7392/1743/170394/58515/80727/55700/57617/11057/23218/200014/6811/1209/51621/267/55810/9766/119392/9854/56905/4335/2889/4627/27245/126917/11188/10844/1408/7030/51343/4650/5170/2870/10106/285381/2137/8897/7320/5045/54434/60685/55967/2316/9679/752/55625/1912/79890/114769
ZNF420	321	-0.22693	-0.469043	1	1	1530	tags=14%, list=27%, signal=11%	9950/23253/6814/9541/4289/23325/6498/58533/54737/55599/5771/6309/54882/977/23670/133746/23451/57404/23014/9648/167153/5868/826/9748/64343/64860/5965/132320/23473/51185/8887/55914/5932/55088/23471/6688/9101/63940/2771/4683/5728/137886/1522/7086/23406/7305
ZKSCAN2	375	-0.174057	-0.362309	1	1	1884	tags=21%, list=34%, signal=15%	201627/254065/9990/9446/9867/55030/51780/7109/7799/57645/2332/84085/130074/80209/221079/22794/54870/9870/23207/57589/164/7716/3839/57403/9213/6655/9728/153241/122525/11044/79691/6670/2787/54882/26524/7994/2631/64928/29066/253832/22890/219333/9320/10095/57617/55233/9583/26959/10725/57085/5048/5894/84967/10499/27125/222658/267/55810/51100/90268/5412/57515/3421/1408/51343/5495/9451/571/1453/160760/5…
CXXC1	140	0.250377	0.655454	1	1	943	tags=26%, list=17%, signal=22%	54865/3182/4172/8607/51154/1663/10785/55695/79622/2189/5888/28958/2237/84296/147841/25886/8479/65993/7866/54058/55152/65094/54903/84939/1786/2618/8568/10061/201255/4723/326625/54496/23065/81890/26995/9277
SREBF1	369	-0.287292	-0.594819	1	1	1367	tags=17%, list=24%, signal=14%	6455/11021/64928/51643/57404/256364/23014/26093/5970/81609/285550/388753/100506860/1743/2664/10159/58515/55700/23218/339487/51125/5252/54978/6811/8887/119392/9854/4335/119504/10318/4627/55969/27113/5527/127829/7030/51343/5914/4650/10106/4122/6892/114789/965/7320/60685/254102/51635/79567/55967/10019/5187/55122/752/79585/80758/4794/84957/2872/56882/3398/114769
ATF6	162	-0.193283	-0.3906	1	1	1530	tags=17%, list=27%, signal=12%	9950/100505641/6814/4289/1314/523/58533/54882/23075/9648/29066/253832/9320/9748/5048/222658/9991/51088/2182/23527/5663/26286/51230/9101/23064/5728/7305
ZNF419	182	0.213678	0.582792	1	1	1184	tags=18%, list=21%, signal=14%	57045/9767/7561/9793/7486/7733/7525/91283/440515/57343/25926/55659/55127/7693/7029/55176/339324/163050/163087/5955/142940/10314/90338/5194/79088/92595/26230/706/284391/57684/56061/144245
ZNF329	187	0.242941	0.682685	1	1	907	tags=17%, list=16%, signal=14%	3178/6748/64116/3956/6421/51307/55225/55159/9767/7561/197358/10169/140823/7733/514/91283/7188/57343/7158/65986/1175/55659/7693/7029/84747/339324/6875/79744/85364/27340/5955
POGK	238	0.17768	0.510649	1	1	796	tags=8%, list=14%, signal=7%	11224/25873/6748/9767/521/10169/140823/23598/514/22869/57343/1021/54539/1175/23132/7514/84747/27130
ASXL2	203	0.142421	0.401527	1	1	82	tags=1%, list=1%, signal=1%	5336/4602
BRPF3	304	0.22473	0.65519	1	1	500	tags=8%, list=9%, signal=8%	11224/6748/6633/10591/746/3956/6421/90480/9349/6147/84300/55159/9767/78988/283489/27089/4637/6164/521/516/55651/10169/140823/489
THAP8	288	0.242113	0.688401	1	1	989	tags=20%, list=18%, signal=18%	402/4830/6182/79077/79001/5425/2193/84326/7374/8607/84300/51154/8673/328/84284/23170/51258/28958/4796/57418/8655/64098/29902/8479/471/65993/113655/1019/4913/83596/5693/594/54903/1468/80233/84939/8568/10061/1312/29901/29920/10901/8815/201255/3033/326625/23640/7157/54496/253769/26995/9277/79033/2068/10856/79763/1174/60386/11164
ZNF682	65	0.241529	0.580902	1	1	1385	tags=34%, list=25%, signal=26%	7561/64098/8574/440515/57343/7693/339324/163050/163087/79744/57489/23270/90338/79088/51427/284391/284309/10795/283209/84503/9668/349075
MBNL2	476	-0.264484	-0.549736	1	1	1209	tags=13%, list=22%, signal=11%	10095/140609/9107/55233/1192/167227/9583/26959/226/10725/84301/57085/29110/5048/84967/1105/10499/27125/50618/51014/50640/10746/51100/6093/11179/55914/54790/4179/5412/80853/57515/3421/55088/5495/23527/9451/571/3267/51322/8780/114882/51762/4780/388403/51696/80315/9975/10287/10672/55788/9444/9958/7048/169200/3516/8202/8301/2872/51274/3091/10892/7150
ZNF416	120	0.178458	0.454413	1	1	1315	tags=23%, list=24%, signal=18%	6421/9767/283489/7561/10169/7733/91283/57343/7693/339324/163050/79744/85364/5955/23270/90338/92595/26230/6722/706/284391/57684/23326/284309/10795/200933/22903/9329
ZNF276	136	-0.20381	-0.408189	1	1	1576	tags=17%, list=28%, signal=12%	23030/10068/9463/26190/2787/80271/7156/7297/23053/11021/256364/118813/57654/1743/5609/200014/7786/51621/4650/219931/5170/4122/271
ZNF740	111	-0.24932	-0.491283	1	1	1677	tags=20%, list=30%, signal=14%	6810/84449/25777/3551/10068/124997/80271/5089/7297/23053/11021/256364/1743/200014/7786/10844/4650/219931/257106/375035/476/100128537
ANKZF1	105	-0.209235	-0.410203	1	1	2227	tags=36%, list=40%, signal=22%	64429/22900/23339/23637/81847/80279/18/280/23041/9725/2073/4735/6619/9924/387921/115294/2145/57577/4905/51478/80208/143/29945/3551/100289019/5934/54737/55599/57035/10955/57798/11311/5965/114826/57658/6773/63901/11329
ZFP28	201	0.235858	0.665982	1	1	1579	tags=33%, list=28%, signal=25%	5588/9767/5311/6894/197358/10169/90488/514/22869/2887/57539/285349/25888/7514/152185/27130/339324/79969/27340/5955/54465/81931/90338/57496/50808/84899/51626/64921/284391/51701/57684/144245/57147/8518/1122/64770/57534/10795/22903/4076/10128/26013/8898/7743/8672/9668/150759/56916/65250/2976/6599/154007/5921/22862/80184/54497/340481/9202/57189/23028/7155/134957/81545/58487/4686/10975/9678
ZNF441	248	0.128433	0.358241	1	1	1334	tags=21%, list=24%, signal=17%	79915/10198/9793/7486/160897/1072/7733/57181/11169/22869/81856/440515/25926/285349/11168/339324/163050/163087/79744/57489/80173/54465/100287765/1653/7570/7705/64417/55728/6150/10314/81931/56898/90338/57496/10146/7675/79088/51427/22995/57684/57147/55132/55345/284309/162655/29966/10795/23279/283209/23318/9657/10915
ZNF585B	156	0.210823	0.561905	1	1	1516	tags=36%, list=27%, signal=27%	4507/10198/55342/160897/54517/28981/22869/84140/23301/285349/25888/152185/10325/672/1479/7157/26751/7705/11128/57496/25929/90861/7753/60526/10240/84899/51626/64921/5378/8518/84064/57534/101060200/4436/23279/79828/84503/6117/7743/8672/138199/6426/80267/1161/56916/26275/5921/3295/10329/80184/9093/54497/340481/9202/199704/51144
ZNF445	158	0.215233	0.593903	1	1	834	tags=14%, list=15%, signal=12%	9781/158405/9767/1953/57546/5311/489/166647/514/22869/399687/7468/7158/64794/55764/6621/7029/23132/57521/84747/27130/8924
SMARCA2	246	0.262456	0.769257	1	1	814	tags=13%, list=15%, signal=12%	11224/6748/9781/56479/746/9331/55225/9767/27089/4637/521/6209/220988/5311/6894/8831/10169/140823/489/514/22869/10644/1021/1175/51079/2887/7514/5438/152185/27130/401251/55752
FLI1	119	-0.238114	-0.473043	1	1	1353	tags=17%, list=24%, signal=13%	9731/79901/5062/11311/1389/57446/22864/55858/23396/137835/53840/56940/10384/93129/23196/6778/401494/10788/11329/92241
ZNF79	133	-0.178162	-0.356478	1	1	2509	tags=40%, list=45%, signal=22%	8939/103/374986/84901/23122/23774/8567/64324/57551/23351/10513/9527/55727/158358/23339/11337/23637/84674/23041/2074/2580/2073/54520/201627/5306/51780/57645/23033/285512/23272/8816/55717/66036/80208/22821/143/1314/5130/4204/7156/54882/9159/23053/118813/9320/200014/5048/23473/57210/4238/5170/5663/23064
KLF3	308	-0.265407	-0.549248	1	1	1026	tags=12%, list=18%, signal=11%	267/55810/10150/114826/51100/85007/5899/119504/5879/53917/3421/127829/7030/9545/5914/734/571/10106/56994/2308/51696/8428/79567/10672/10019/9444/55122/7048/169200/752/79627/8301/9846/2872/2683/4067/602/415116
KAT5	36	0.201838	0.434399	1	1	4465	tags=100%, list=80%, signal=20%	116840/100132774/200205/100506436/285033/8314/80335/55147/7415/100131017/9092/57805/8724/400960/7922/7428/92822/5119/2972/55738/9785/5298/84271/100873956/10652/29916/23293/5432/85406/23351/79165/10068/11021/118813/26093/7786
RBX1	359	0.236352	0.686693	1	1	620	tags=9%, list=11%, signal=8%	11224/100507303/51659/6633/10591/746/9521/90480/9349/6147/25911/6635/51690/27089/400986/6164/378708/521/6632/516/55651/1033/387103/8831/10169/140823/51053/254013/7979/9232/468/54069
PATZ1	205	-0.229222	-0.46746	1	1	849	tags=5%, list=15%, signal=5%	11188/23338/4650/7320/55967/57217/9679/2512/6303/57222/114769
ZSCAN12	205	-0.146005	-0.298486	1	1	1904	tags=21%, list=34%, signal=15%	6667/55667/201627/254065/51780/57645/84085/130074/80209/22794/54870/9870/57589/54878/55717/3839/6655/8702/9728/122525/11044/5828/79691/6670/26524/7994/29066/23405/253832/219333/9320/64860/26959/10725/57085/222658/51100/51088/5495/51322/9051/10287/7048/8202
ZNF322	112	0.121329	0.310131	1	1	1017	tags=12%, list=18%, signal=10%	10198/9793/57181/22869/285349/339324/163087/79744/55726/7705/26263/81931/56898/90338
ZIK1	93	0.243599	0.592473	1	1	1360	tags=30%, list=24%, signal=23%	57045/9767/7561/90488/7733/91283/440515/57343/55659/7693/339324/163087/79744/5955/142940/23270/90338/79088/26230/706/284391/57684/284309/10795/200933/9329/8898/9668
ZNF174	62	0.214842	0.521048	1	1	1218	tags=27%, list=22%, signal=22%	283489/489/92935/23598/55659/79724/85364/29985/10155/140680/92595/84922/8683/84327/387787/6929/705
KDM4B	133	-0.219966	-0.439197	1	1	1660	tags=27%, list=30%, signal=19%	80208/5253/51564/25777/150465/57186/3551/5585/2787/57105/5089/1455/23250/54776/7297/23053/9731/256364/85414/57654/1743/9909/57326/200014/55281/23353/4261/4650/219931/6778/3716/54507/1794/80709/6653/57222
ING3	427	-0.2904	-0.600002	1	1	1477	tags=19%, list=26%, signal=15%	10250/5089/143384/29115/54737/55599/1455/5771/25994/160/4055/9550/57140/80219/5018/8446/64928/283635/51643/57404/256364/23014/9648/124491/81609/388753/100506860/7392/5973/56674/826/2664/10159/58515/29998/9909/51125/26137/4942/132320/54978/6811/51185/1445/8887/5912/64397/9612/830/7454/4627/55969/5527/4478/7030/5611/7016/10106/3705/151556/6892/23654/23471/7320/60685/51228/254102/6688/55967/9709/639…
NFYC	93	0.224768	0.552743	1	1	506	tags=5%, list=9%, signal=5%	9315/7374/55695/8655/116028
ZNF627	287	-0.188086	-0.387311	1	1	1942	tags=24%, list=35%, signal=17%	6400/8450/65056/55667/2874/1657/201627/254065/25978/9867/23429/57092/2332/6881/56990/55773/56900/54878/7716/3839/5586/9728/996/153241/8867/122525/84248/5828/79691/9950/6670/6814/9541/4289/58533/51582/6309/23451/9648/29066/167153/5868/9748/9528/9107/55233/64860/26959/1540/23473/51014/51100/9991/55914/4238/5932/57515/55088/2182/5495/23527/10308/51322/114882/51762/4780/9101/23064/4683/3516
ATF7IP	386	0.135052	0.395576	1	1	1047	tags=11%, list=19%, signal=9%	5567/6748/3146/79915/9767/10198/4637/9793/80097/55342/10576/7738/7733/51018/57181/3187/22869/64395/79598/3998/25926/134637/7514/11168/339324/163087/6875/57489/27340/5955/55726/1964/11052/54465/142940/7705/55728/10314/90338/5411/10146/51430
UBE2B	476	-0.271753	-0.568433	1	1	1667	tags=23%, list=30%, signal=18%	388552/5204/8915/9138/5805/51564/25777/23295/51035/6874/5585/165918/26267/4700/2052/5720/51128/84164/23253/84273/9541/23616/10250/5089/143384/29115/54737/1455/25994/2987/160/9550/7297/57140/80219/5018/8446/64928/283635/51643/57404/256364/23014/9648/124491/140739/81609/5868/388753/100506860/7392/5973/56674/826/2664/10159/58515/29998/9909/23218/51125/26137/4942/54978/6811/375387/51185/1445/5330/888…
ZMYND11	172	0.190897	0.508713	1	1	1516	tags=29%, list=27%, signal=22%	4602/9331/135293/4507/55342/160897/54517/143888/23301/152185/27130/55752/10325/672/54914/1479/26751/5558/253769/53615/51474/9875/90861/7753/50808/60526/84899/64921/54919/5378/8518/57534/79828/10128/6117/8672/25920/6426/80267/6599/5921/3295/10329/54497/340481/9202/5422/56893/7155/51144
ZNF124	176	-0.196323	-0.393129	1	1	1456	tags=12%, list=26%, signal=9%	143384/54737/55599/100130476/57404/23014/100506860/23177/826/26137/256987/51185/8887/91526/5527/6892/26286/7320/2771/84458/5728
CLOCK	195	-0.237327	-0.485149	1	1	2010	tags=27%, list=36%, signal=18%	2074/2073/4735/4087/6619/79684/9879/55252/57577/8417/4124/84376/23033/4905/23272/6815/8648/3717/23161/51135/55717/80208/143/50809/29945/9950/100505641/5934/51809/23325/9317/11215/5925/11311/140609/64853/5965/55858/132320/53840/28962/9991/55914/11342/9765/80005/23527/63901/3688/4026/120/5728/137886
ZNF529	326	0.168791	0.488542	1	1	922	tags=10%, list=17%, signal=9%	3178/57045/64116/6421/2023/262/9767/7561/7738/55432/90488/7733/51018/7525/91283/64216/440515/57343/65986/25926/55659/7693/339324/163087/6875/79744/79969/57489/5955/55726/1964/11052/54465
NCOR1	64	-0.239924	-0.455773	1	1	1784	tags=30%, list=32%, signal=20%	23122/57551/58508/55727/8916/158358/11337/23041/285512/80208/143/4289/1314/4204/54882/9320/26523/50618/23064
TRIM24	192	-0.235922	-0.477928	1	1	1273	tags=11%, list=23%, signal=9%	219333/9320/10095/140609/10725/57085/5048/3987/222658/10150/51100/9991/3421/10106/51322/9051/3716/9444/169200/152007/1508
TFPT	186	0.292159	0.767562	1	1	728	tags=13%, list=13%, signal=12%	4282/4830/6182/79077/79001/84326/26517/284184/78988/8673/80097/51258/28958/517/57418/55432/65993/1019/83596/51596/54539/1468/51181/1175
PKNOX1	73	0.249001	0.615922	1	1	1444	tags=40%, list=26%, signal=30%	4507/84937/28981/101929147/84140/84939/2618/80227/55835/221188/1479/26751/26263/11128/11232/60526/56339/90529/57147/400506/51134/91749/6293/84064/101060200/80267/26275/3295/101927027
ZNF217	274	-0.255108	-0.52557	1	1	1029	tags=13%, list=18%, signal=11%	51014/267/55810/51100/57471/401548/136319/90268/57515/3421/1408/5495/571/3267/8897/160760/10308/51696/54434/90427/10672/526/9267/23064/3720/9444/7048/752/55625/23268/56261/6867/8202/79627/8301
PPARA	74	0.154056	0.366411	1	1	4736	tags=100%, list=85%, signal=15%	160897/22869/6621/23301/152185/55835/221188/7705/11128/57496/25929/90861/7753/84899/57147/6117/8672/80267/5921/3295/9202/57536/55751/23199/118/9917/22834/23367/146691/23505/23185/11216/55844/26750/9993/10768/80167/9416/4077/139716/9575/11101/10771/56886/104/64131/528/89122/57551/10228/283537/158358/22900/84343/23637/18/79591/4087/6619/55252/54838/4905/23272/80208/143/3551/100289019/3631/23048/973…
ZKSCAN5	173	-0.223986	-0.450699	1	1	1959	tags=20%, list=35%, signal=14%	54520/58490/6400/55667/1657/23429/55030/51780/130074/9870/8816/54878/66036/9728/324/26190/4289/1314/54882/118813/9748/91445/1540/5048/23473/5894/222658/60436/4238/5495/1453/5663/9101/10094/23064
PLAGL2	184	0.251176	0.687938	1	1	480	tags=9%, list=9%, signal=9%	11224/6633/10591/746/6421/90480/9349/51307/6147/78988/27089/6164/521/28958/516/55651/10169
ZNF829	166	-0.152818	-0.308578	1	1	1659	tags=14%, list=30%, signal=10%	5586/3572/9728/324/84248/51128/23253/9541/23670/133746/9648/826/285966/226/1540/23473/1105/50640/57515/55088/9101/9975/7305
MAX	194	-0.270641	-0.546905	1	1	1463	tags=22%, list=26%, signal=17%	3845/400916/143384/5223/142891/221/284759/51362/80219/8446/411/124491/81622/5868/200186/2553/27342/1540/158830/1105/51185/2548/4668/26469/11006/2117/51526/5495/25939/3705/6778/8742/8741/2209/2760/1200/5500/920/6813/83937/313/221472
RFX5	82	0.226225	0.537234	1	1	1368	tags=30%, list=24%, signal=23%	5336/4507/220988/6894/3181/64794/8568/152185/8924/116840/253769/55813/9875/7006/124454/9894/57147/64210/91749/6293/4076/7743/8672/25920/6426
REPIN1	160	0.242836	0.638966	1	1	425	tags=4%, list=8%, signal=4%	9315/6666/4056/400986/6723/708/11007
ZNF827	69	-0.180907	-0.341525	1	1	806	tags=25%, list=14%, signal=21%	9818/51592/10427/8239/9520/55667/23429/2332/80209/221079/9450/5586/221/10095/5495/51762/169200
ZNF30	87	0.201373	0.490797	1	1	1258	tags=25%, list=23%, signal=20%	6147/400986/5471/254013/81856/51602/375248/55120/57489/132299/80173/1653/64417/57730/7675/246243/10772/84942/55149/6742/9933/81688
ZSCAN22	13	-0.181411	-0.302869	1	1	1422	tags=54%, list=25%, signal=40%	9416/353274/7508/58500/84674/7156/114826
TCF4	55	0.204937	0.483444	1	1	988	tags=16%, list=18%, signal=14%	3070/81856/7443/135228/11198/80173/1653/64417/55728
