# Supplementary material for: Pediatric acute myeloid leukemia tumor composition predicts patient outcomes at diagnosis and reveals mechanisms of resistance to chemotherapy
Source: Research Square preprint supplement (doi:10.21203/rs.3.rs-4669225/v1), 2026-01-23
Supplement: Supplementary file 7 [file 8119e8e59794d0bfb2c4097a.xlsx]

## Sheet: Sheet1
		PAVBFN	PAUNSV	PAUVAT	PAUMTZ		PARBIU
label	target						label	target
89Y	CD45	x	x	x	x		89Y	CD45
141Pr	CD116	x	x	x	x		113In	CD61
142Nd	CD19	x	x	x	x		115IN	CD99
143Nd	CD117	x	x	x	x		139La	CD45RA
144Nd	CD38	x	x	x	x		140Ce	CLL1
145Nd	CD16	x	x	x	x		142Nd	CD44
146Nd	CD64	x	x	x	x		143Nd	CD117
147Sm	pStat5 [Y694]	x	x	x	x		144Nd	CD123
148Nd	CD34	x	x	x	x		145Nd	CD93
149Sm	CD115	x	x	x	x		146Nd	CD90
151Eu	CD123/IL-3R	x	x	x	x		148Sm	CD34
152Sm	Cleaved Caspase-7	x	x	x	x		149Sm	CD32
153Eu	CD7	x	x	x	CD32		150Sm	pSTAT5
154Sm	CD3	x	x	x	x		151Eu	CD11c
155Gd	CD56/NCAM	x	x	x	x		152Sm	CD13
156Gd	CD184/CXCR4	x	x	x	x		153Eu	pAKT
158Gd	pStat3 [Y705]	x	x	x	x		154Gd	TIM3
159Tb	CD90	x	x	x	x		155Gd	CD56
160Gd	CD14	x	x	x	x		156Gd	BCLXL
161Dy	Ki-67	x	x	x	x		158Gd	CD33
162Dy	CD44	x	x	x	x		160Gd	CD14
164Dy	CD36	x	x	x			162Dy	CD38
165Ho	beta-Catenin	x	x	x	x		163Dy	pSTAT3
166Er	pNF-kB p65 [S529]	x	x	x	x		164Dy	BCL2
167Er	pERK 1/2 [T202/Y204]	x	x	x	x		165Ho	CD16
168Er	CD130	x	x	x	x		166Er	CD68
169Tm	CD33	x	x	x	x		167Er	MPO
170Er	CD135/FLT3	x	x	x	x		168Er	pSTAT1
171Yb	CD74	x	x	x			169Tm	CD47
173Yb	HLA-DR	x	x	x	x		170Er	CD135
174Yb	CD45RA	x	x	x			171Yb	CD244
175Lu	pS6 [S235/S236]	x	x	x	x		172Yb	pS6
176Yb	CD114	x	x	x	x		173Yb	CD49f
209Bi	CD11b/Mac-1	x	x	x	x		174Yb	HLA-DR
							175Lu	CD71
							176Yb	pCREB
							209Bi	CD11b/Mac-1
