# Supplementary material for: Pediatric acute myeloid leukemia tumor composition predicts patient outcomes at diagnosis and reveals mechanisms of resistance to chemotherapy
Source: Research Square preprint supplement (doi:10.21203/rs.3.rs-4669225/v1), 2026-01-23
Supplement: Supplementary file 8 [file b553739c6368ee4763ef9337.xlsx]

## Sheet: MouseModels
Model ID	Age at Diagnosis (yr)	Sex	Race	Ethnicity	Disease Timepoint	FAB Category	Fusions/Mutations	Host Mouse
AML001	1.3	Male	White	Not Hispanic or Latino	Relapse	M5	KMT2A::MLLT10	MISTRG
AML005	16.7	Male	White	Hispanic or Latino	Relapse	M4	KMT2A::MLLT4	MISTRG
AML006	9.7	Male	Black or Afr Amer	Not Hispanic or Latino	Relapse	M4	KMT2A::MLLT1	NSGS
AML010	2.5	Male	White	Hispanic or Latino	Diagnosis	M7	+10 (trisomy)	MISTRG
AML013	12.9	Male	Black or Afr Amer	Not Hispanic or Latino	Diagnosis	M5	KMT2A::MLLT4	NSGS
AML901	9.7	Female	White	Not Hispanic or Latino	Diagnosis	M5	KMT2A::MLLT10	NSGS
AML903	17	Female	Not Reported	Not Hispanic or Latino	Diagnosis	M2	NPM1 and IDH2 mutations	NSGS
AML905	1.4	Female	White	Hispanic or Latino	Diagnosis	M7	CFBA2T3::GLIS2	MISTRG6

## Sheet: ModelResponse
AML901	group	pre-tx CD45+		BM	Prfoiled by scRNA-Seq
203	Saline	20.8		82.19
206	Saline	0.4		73.21
207	Saline	12.23		72.86
202	AraC	41.78		85.44
204	AraC	14.39		76.91
205	AraC	1.29		81.4
AML903	group	pre-tx CD45+		BM
163	saline	19.57		97.08	Y
168	saline	12.68		97.74
164	AraC	14.5		96.87	Y
165	AraC	18.32		98.04
166	AraC	15.02		95
AML006	group	pre-tx CD45+		BM
2325-2	saline	4.28		85.23
2323-5	saline	2.7		87.88	Y
2325-1	AraC	17.12		15.27	Y
2318-3	AraC	9.78
AML005	group	pre-tx CD45+		BM
2439-1	Saline	8.12		63.98
2439-4	Saline	11.88		77.59	Y
2443-3	Saline	3.33		9.57
2444-1	Saline	1.27		66.82
2444-2	Saline	3.14		56.93
2439-2	AraC	6.96		49.77
2443-2	AraC	3.85		7.22	Y
2439-3	AraC	7.41		47.65
2439-5	AraC	8.36		74.96
2443-1	AraC	1.54		3.17
AML001	group	pre-tx CD45+		BM
2437-1	Saline	1.3		42.1
2437-3	Saline	19.4		60.7
2438-3	Saline	1.1		2.6
2451-3	Saline	4.1		60.18	Y
2437-2	AraC	18.9		58.3
2438-2	AraC	0.6		8.6
2451-1	AraC	1.1		28.7
2451-2	AraC	0.3		10	Y
AML013	group	pre-tx CD45+		BM
2561-2	Saline	21.77		76.21
2561-1	Saline	22.86		88.21
2556-3	Saline	20.29		89.1
2557-1	Saline	22.75		86.29
2556-2	AraC	14.43		91.4
2556-1	AraC	21.43		90.99
2561-3	AraC	17.18		91.18
2556-4	AraC	13.19		88.86
AML010	group	pre-tx CD45+		BM
2459-1	saline			74.4
2462-3	saline			74.76
2465A-1	Saline			26.2	Y
2465A-3	AraC			38.6
2461-2	AraC			53.71
2459-5	AraC			69.24	Y
AML905	group	pre-tx CD45+		BM
2465-1	Saline	7.03		66.9	Y
2465-3	Saline	3.21		17.06
2493-3	Saline	0		42.44
2493-4	Saline	3.82		12.17
2493-5	Arac	6.32		83	Y
2493-2	Arac	4.87		70.3
