# Supplementary material for: Pediatric acute myeloid leukemia tumor composition predicts patient outcomes at diagnosis and reveals mechanisms of resistance to chemotherapy
Source: Research Square preprint supplement (doi:10.21203/rs.3.rs-4669225/v1), 2026-01-23
Supplement: Supplementary file 9 [file bbe94ccc0c5e274282a4a752.xlsx]

## Sheet: Sheet1
MRD	T	cytogenetics	Excluded	Alive (>2yrs)	DOD	DOD Rate
Neg	low	low-risk	8	200	22	0.0990991
Neg	low	high-risk	3	71	23	0.244681
Neg	high	low-risk	0	54	17	0.239437
Neg	high	high-risk	3	127	96	0.430493
Pos	low	low-risk	2	43	24	0.358209
Pos	low	high-risk	3	14	24	0.631579
Pos	high	low-risk	2	7	19	0.730769
Pos	high	high-risk	9	30	69	0.69697
Patients with less than a 2-year follow up were excluded
