# Supplementary material for: Pediatric acute myeloid leukemia tumor composition predicts patient outcomes at diagnosis and reveals mechanisms of resistance to chemotherapy
Source: Research Square preprint supplement (doi:10.21203/rs.3.rs-4669225/v1), 2026-01-23
Supplement: Supplementary file 10 [file c5bc8e7efe907301f89e64a7.xlsx]

## Sheet: OS-Rs+PCC
coef exp(coef) se(coef) z p
Total R 3.7764 43.6576 0.8070 4.680 2.87e-06
PCCinv(16) -0.8733 0.4176 0.3372 -2.590 0.00960
PCCMLL 0.4805 1.6168 0.1804 2.663 0.00774
PCCOther 0.4354 1.5456 0.1818 2.395 0.01661
PCCt(8;21) -0.4020 0.6690 0.2496 -1.611 0.10725
PCCUnknown -0.4321 0.6491 0.7266 -0.595 0.55208
Likelihood ratio test=94.05 on 6 df, p=< 2.2e-16
n= 870, number of events= 294
PCC: Primary Cytogenetics Code

## Sheet: OS-Rs+PCC+MRD
coef exp(coef) se(coef) z p
Total R 3.4010 29.9952 0.8242 4.126 3.69e-05
PCCinv(16) -0.6834 0.5049 0.3396 -2.013 0.044154
PCCMLL 0.6607 1.9362 0.1814 3.643 0.000269
PCCOther 0.3351 1.3981 0.1821 1.841 0.065693
PCCt(8;21) -0.3927 0.6753 0.2500 -1.570 0.116324
PCCUnknown -0.3159 0.7291 0.7278 -0.434 0.664191
MRD.at.end.of.course.1Unknown 1.4407 4.2238 0.2230 6.460 1.04e-10
MRD.at.end.of.course.1Yes 1.0234 2.7826 0.1282 7.984 1.42e-15
Likelihood ratio test=172 on 8 df, p=< 2.2e-16
n= 870, number of events= 294

## Sheet: OS-Rs+PCC+MRD+Risk
coef exp(coef) se(coef) z p
Total R 3.137691 23.050586 0.830848 3.776 0.000159
PCC.subinv(16) -0.004207 0.995801 0.405016 -0.010 0.991711
PCC.subMLL 0.168046 1.182991 0.209291 0.803 0.422014
PCC.subOther -0.064060 0.937949 0.198589 -0.323 0.747018
PCC.subt(8;21) 0.318691 1.375326 0.336256 0.948 0.343251
MRD.at.end.of.course.1Unknown 1.410975 4.099951 0.226866 6.219 4.99e-10
MRD.at.end.of.course.1Yes 0.906533 2.475724 0.131837 6.876 6.15e-12
Riskb Low -1.167521 0.311137 0.307432 -3.798 0.000146
Riskb High 0.099374 1.104479 0.144445 0.688 0.491469
Likelihood ratio test=190.1 on 9 df, p=< 2.2e-16
n= 861, number of events= 292
