# Supplementary material for: Pediatric acute myeloid leukemia tumor composition predicts patient outcomes at diagnosis and reveals mechanisms of resistance to chemotherapy
Source: Research Square preprint supplement (doi:10.21203/rs.3.rs-4669225/v1), 2026-01-23
Supplement: Supplementary file 11 [file f19020c638a013f7f829468f.xlsx]

## Sheet: Table-cellType-PAVTLN-res2 5-20
	0	1	2	3	4	5	6	7	8	9	10	11	12	13	14	15	16	17	18	19	20	21	22	23	24	25	26	27	28	29	30	31	32	33	34	35	36	37	38	39	40	41	42	43	44	45	46
B_cell	0	1	0	0	0	0	1	0	0	0	1	0	63	0	0	86	0	1	0	0	0	2	1	0	0	0	0	31	169	16	0	301	2	274	0	0	22	0	0	0	0	163	0	2	0	0	0
BM	1	0	0	0	2	0	0	0	0	0	1	0	0	0	0	0	0	0	0	0	1	1	0	0	0	0	0	0	0	0	0	4	0	0	0	0	0	0	0	0	0	0	0	0	0	0	0
BM & Prog.	0	0	0	0	131	0	0	0	0	0	8	0	0	0	0	0	0	0	0	0	0	0	0	0	0	0	0	1	0	0	0	0	0	0	0	0	0	0	0	0	0	0	0	0	0	0	0
CMP	0	5	0	0	18	15	177	38	32	25	2	226	0	16	39	0	38	1	0	5	0	0	9	0	1	0	0	28	0	0	0	0	0	0	0	5	2	0	0	0	0	0	5	3	0	0	0
DC	0	8	0	0	0	1	0	0	0	0	0	0	0	0	1	1	0	0	0	0	0	0	0	1	1	4	0	1	0	0	0	0	15	0	0	0	0	1	2	0	0	0	0	0	0	0	0
Erythroblast	0	0	0	0	462	0	0	0	0	0	620	0	0	0	0	0	0	0	534	0	514	0	0	0	0	0	0	0	0	0	0	0	0	0	0	0	0	0	0	0	0	0	0	0	0	0	0
GMP	0	527	1	0	1	822	645	680	526	428	0	377	0	578	544	87	525	4	0	510	0	0	122	0	62	122	0	26	0	0	95	0	20	0	0	47	37	46	8	23	0	1	127	90	0	0	0
HSC_CD34+	0	5	0	0	4	0	1	0	0	0	1	0	0	0	1	4	0	2	0	0	0	0	3	5	14	0	0	51	0	0	0	0	5	1	0	2	0	0	0	0	0	1	0	6	0	0	0
Macrophage	0	2	0	0	0	0	0	0	0	0	0	0	0	0	0	0	0	0	0	0	0	0	0	0	0	0	0	0	0	0	0	0	0	0	0	0	0	1	0	0	0	0	0	0	0	0	0
MEP	0	0	0	0	291	0	3	0	0	0	25	14	0	0	0	0	0	1	0	0	0	0	0	0	0	0	0	15	0	0	0	0	0	0	0	0	0	1	0	0	0	0	1	1	0	0	0
Monocyte	0	609	1253	1121	1	25	0	3	0	0	1	10	0	1	7	212	2	437	0	7	0	0	181	280	287	303	399	54	0	0	221	0	197	0	0	0	64	171	198	0	188	1	4	3	0	0	0
Myelocyte	0	12	3	0	0	0	0	0	0	12	0	0	0	0	0	0	0	0	0	0	0	0	1	0	0	0	0	0	0	0	0	0	0	0	0	0	0	2	0	0	0	0	0	1	0	0	0
Neutrophils	0	42	6	147	0	0	0	0	0	0	0	0	0	0	1	1	0	82	0	0	0	0	156	188	70	2	8	6	0	0	0	1	41	0	0	0	0	2	10	0	0	0	0	0	0	0	0
NK_cell	0	63	0	0	1	0	4	0	0	0	0	9	0	0	3	120	0	1	0	0	0	25	0	0	4	1	0	44	1	0	0	1	11	0	0	0	1	0	0	0	0	2	0	2	0	93	0
Osteoblasts	0	0	0	0	0	0	0	0	0	0	0	0	0	0	0	0	0	0	0	0	0	0	0	0	0	0	0	0	0	0	0	0	0	0	0	0	0	0	0	0	0	0	0	0	0	0	7
Platelets	0	0	0	0	0	0	0	0	0	0	0	0	0	0	0	0	0	0	0	0	0	0	0	0	0	0	0	0	1	0	0	0	0	0	0	0	0	0	0	0	0	0	0	0	0	0	0
Pre-B_cell_CD34-	0	37	10	0	1	0	0	1	0	0	0	0	1	0	1	62	1	18	0	0	0	0	3	2	11	3	0	13	1	1	3	1	3	2	0	0	105	18	8	0	1	1	6	4	0	0	0
Pro-B_cell_CD34+	2233	1	0	0	6	0	2	3	162	1	8	0	548	0	1	8	0	0	0	0	2	3	1	0	0	1	0	117	207	330	0	0	1	0	256	197	17	2	0	202	1	2	0	18	103	0	2
Pro-Myelocyte	0	25	1	0	4	0	1	1	3	250	0	0	0	9	0	0	6	0	0	1	0	0	1	0	3	0	0	1	0	0	3	0	1	0	0	0	1	2	0	0	0	0	11	6	0	0	0
T_cells	0	1	0	0	0	0	0	0	0	0	0	0	0	0	0	1	0	0	0	0	0	475	1	0	0	0	0	2	0	0	0	0	0	0	0	0	0	0	0	0	0	0	0	0	0	3	0
Tissue_stem_cells	0	0	0	0	1	0	0	0	0	0	0	0	0	0	0	0	0	0	0	0	0	0	0	0	1	0	0	0	0	0	0	0	0	0	0	0	0	0	0	0	0	0	0	0	0	0	43

## Sheet: Table-cellType-PAVBFN-res2 5-20
	0	1	2	3	4	5	6	7	8	9	10	11	12	13	14	15	16	17	18	19	20	21	22	23	24	25	26	27	28	29	30	31	32	33	34	35	36	37	38	39	40	41	42	43	44
Astrocyte	0	0	0	0	0	0	0	0	0	0	0	0	0	0	1	0	0	0	0	0	0	0	0	0	0	0	0	0	0	0	0	0	0	0	0	0	0	0	0	0	0	0	0	0	0
B_cell	0	0	0	3	0	0	0	0	0	3	0	0	0	0	0	0	0	0	0	93	1	0	34	0	0	0	4	24	196	0	1	0	10	1	300	4	280	23	1	0	0	0	167	2	0
BM	0	0	0	0	0	0	0	0	0	0	0	0	0	3	0	0	0	0	0	0	1	0	0	1	0	0	0	0	0	0	0	0	0	0	5	0	0	0	0	0	0	0	0	0	0
BM & Prog.	0	0	0	1	0	0	0	0	0	1	0	0	0	133	5	0	0	0	0	0	5	0	0	0	0	0	0	1	0	0	0	0	0	0	0	1	0	0	0	0	0	1	0	0	0
CMP	667	114	213	342	0	773	566	0	0	450	200	147	32	48	410	351	572	294	0	1	3	0	0	0	0	0	5	51	0	1	0	0	10	0	0	56	0	0	0	0	0	16	0	3	0
DC	0	0	0	0	0	0	0	0	0	0	0	0	0	0	2	0	0	0	0	1	0	1	0	0	0	0	0	2	0	0	0	7	0	1	0	1	0	0	11	0	0	1	0	0	0
Epithelial_cells	0	0	0	0	0	0	0	0	0	0	1	0	0	0	0	0	0	0	0	0	0	0	0	0	0	0	0	0	0	0	0	0	0	0	0	0	0	0	0	0	0	0	0	0	0
Erythroblast	0	0	0	1	0	0	0	0	0	3	0	0	0	397	0	0	0	1	0	0	605	0	0	558	563	0	0	2	0	0	0	0	0	0	0	1	0	0	0	0	0	0	1	0	0
GMP	1322	1622	1500	1246	3	452	567	1	3	261	915	998	895	1	162	501	122	362	0	92	1	1	1	0	0	1	11	47	0	9	1	38	13	1	0	50	0	36	6	0	0	8	1	22	0
HSC_CD34+	2	2	0	0	0	4	4	1	0	91	2	1	2	3	78	1	2	2	0	17	0	4	0	0	0	1	0	67	1	15	0	0	1	0	0	20	0	0	2	0	0	8	1	0	0
Macrophage	0	0	0	0	0	0	0	0	0	0	0	1	0	0	0	0	0	0	0	0	0	0	0	0	0	0	0	0	0	0	0	0	0	0	0	0	0	0	0	0	0	0	0	0	0
MEP	2	0	1	0	0	4	21	0	0	8	3	0	0	308	18	1	10	4	0	0	13	1	0	0	0	0	0	14	0	0	0	0	0	0	0	4	0	0	0	0	0	2	1	0	0
Monocyte	7	79	37	22	0	27	18	1116	1243	46	12	11	41	9	14	5	5	67	0	230	0	345	0	0	1	522	0	57	0	246	0	344	1	285	0	11	0	67	165	0	192	1	0	0	0
Myelocyte	0	0	0	0	0	0	0	0	0	0	0	0	0	0	0	0	0	2	0	0	0	1	0	0	0	0	0	0	0	0	0	0	0	0	0	0	0	0	0	0	0	0	0	0	0
Neutrophils	0	1	0	0	0	7	7	179	4	13	1	0	12	0	14	0	0	4	0	3	1	264	0	0	0	12	0	15	0	129	0	0	0	43	0	0	1	0	35	0	0	1	0	0	0
NK_cell	14	70	17	91	0	233	285	1	0	291	23	38	54	1	185	18	67	4	0	141	1	0	0	0	0	0	0	80	1	1	7	2	0	1	1	12	0	2	2	120	0	2	2	0	0
Osteoblasts	0	0	0	0	0	0	0	0	0	0	0	0	0	0	0	0	0	0	0	0	0	0	0	0	0	0	0	0	0	0	0	0	0	0	0	0	0	0	0	0	0	0	0	0	7
Platelets	0	0	0	0	0	0	0	0	0	0	0	0	0	0	0	0	0	0	0	0	0	0	1	0	0	0	0	0	0	0	0	0	0	0	0	0	0	0	0	0	0	0	0	0	0
Pre-B_cell_CD34-	5	0	14	0	0	2	0	0	11	4	1	0	0	3	1	0	1	13	0	63	0	2	2	1	0	0	3	14	1	6	0	1	1	2	3	1	0	104	3	0	1	0	1	0	0
Pro-B_cell_CD34+	1	13	5	37	1648	3	0	0	0	17	4	3	0	13	2	1	1	7	660	10	2	0	538	4	0	0	457	47	213	0	2	1	346	0	4	120	0	16	0	1	1	150	4	146	1
Pro-Myelocyte	103	3	48	10	0	3	10	0	0	15	50	3	1	5	8	10	8	12	0	0	0	0	0	2	0	0	0	3	0	0	0	0	0	0	0	2	0	0	0	0	0	0	0	0	0
T_cells	1	0	0	6	1	6	8	0	0	7	0	1	0	0	7	0	5	0	0	3	0	1	0	0	0	0	0	4	0	0	395	0	0	0	0	0	0	0	0	102	0	0	0	1	0
Tissue_stem_cells	0	0	0	0	0	0	0	0	0	0	0	0	0	1	0	0	0	0	0	0	0	0	0	0	0	0	0	1	0	0	0	0	0	0	0	0	0	0	0	0	0	0	0	0	43

## Sheet: Table-cellType-PAUVAT-res2 5-20
	0	1	2	3	4	5	6	7	8	9	10	11	12	13	14	15	16	17	18	19	20	21	22	23	24	25	26	27	28	29	30	31	32	33	34	35	36	37	38	39	40	41	42	43	44
B_cell	0	0	0	0	0	0	0	0	1	0	0	0	2	0	0	0	0	14	0	1	0	629	92	0	32	0	3	0	0	0	0	1	0	162	1	22	2	27	0	0	0	163	0	0	0
BM	0	0	0	0	0	0	0	0	0	0	0	1	0	0	0	0	0	0	0	0	1	5	0	0	0	0	0	0	0	0	2	1	0	0	0	0	0	0	0	0	0	1	0	0	0
BM & Prog.	0	0	0	0	0	0	0	0	1	0	0	0	0	0	0	0	0	0	0	0	99	0	0	0	0	40	0	0	0	0	0	1	0	0	0	0	0	1	0	0	0	0	0	0	0
CMP	319	971	592	834	71	0	167	0	447	0	531	0	212	76	1	289	139	121	1	0	156	0	1	157	1	0	108	1	1	16	0	6	0	0	0	0	0	6	0	1	5	0	0	0	0
DC	0	0	0	0	0	0	0	0	2	0	0	0	0	0	0	0	0	0	1	0	0	0	1	0	0	0	2	0	8	0	0	0	0	0	0	0	12	1	0	0	0	0	0	0	0
Erythroblast	0	0	0	0	0	0	0	0	2	0	0	0	0	0	828	0	0	0	0	0	93	0	0	0	0	444	1	0	0	0	411	372	0	0	0	0	0	0	0	0	0	1	0	0	0
GMP	1856	1060	1138	895	1388	8	882	3	400	0	487	0	241	725	0	521	403	186	0	1	6	4	89	406	0	0	140	7	40	279	0	1	0	0	0	33	11	6	0	3	28	1	0	10	0
HSC_CD34+	3	0	0	0	0	0	0	0	37	0	1	0	0	0	0	0	2	0	5	0	5	0	13	0	0	0	54	14	0	0	0	0	0	0	0	0	4	31	0	2	0	1	1	0	0
Macrophage	0	0	0	0	1	0	0	0	0	0	0	0	0	0	0	0	0	0	0	0	0	0	0	0	0	0	0	0	0	0	0	0	0	0	0	0	0	0	0	0	0	0	0	0	0
MEP	0	3	0	0	0	0	0	0	9	0	11	0	0	0	0	0	0	2	1	0	325	0	0	0	0	30	6	0	0	1	0	6	0	0	0	0	0	11	0	0	0	0	0	0	0
Monocyte	5	1	0	2	61	0	0	1224	39	1098	2	0	0	48	0	0	4	1	404	0	4	0	227	2	0	0	47	299	370	23	0	0	366	0	288	70	172	38	192	130	0	1	0	46	0
Myelocyte	0	0	0	1	1	0	0	2	0	0	0	0	0	0	0	0	2	0	0	0	0	0	0	0	0	0	0	2	0	2	0	0	0	0	0	0	0	0	0	1	0	0	0	3	0
Neutrophils	0	1	0	1	1	0	0	17	3	133	1	0	0	0	0	0	0	0	295	0	0	1	3	0	0	0	13	137	3	1	0	0	8	0	39	0	30	6	0	38	0	0	0	3	0
NK_cell	55	4	55	2	8	0	203	0	113	0	164	0	0	5	0	1	0	0	1	146	0	1	136	25	0	0	37	3	2	1	0	0	0	1	2	2	5	22	0	1	0	2	0	0	0
Osteoblasts	0	0	0	0	0	0	0	0	0	0	0	0	0	0	0	0	0	0	0	0	0	0	0	0	0	0	0	0	0	0	0	0	0	0	0	0	0	0	0	0	0	0	0	0	7
Platelets	0	0	0	0	0	0	0	0	0	0	0	0	0	0	0	0	0	0	0	0	0	0	0	0	1	0	0	0	0	0	0	0	0	0	0	0	0	0	0	0	0	0	0	0	0
Pre-B_cell_CD34-	0	0	0	1	10	1	0	5	1	0	0	0	2	6	0	0	4	1	3	0	1	2	61	1	3	0	1	2	0	22	0	0	0	2	4	104	4	14	0	7	0	1	0	22	0
Pro-B_cell_CD34+	18	0	49	0	3	1388	31	0	101	0	2	916	434	0	0	0	1	445	0	3	3	3	7	8	540	3	61	0	3	2	0	0	0	208	0	15	0	44	0	0	146	4	96	0	2
Pro-Myelocyte	0	1	0	0	6	0	0	0	10	0	0	0	0	24	0	0	237	6	0	0	0	0	0	0	0	0	2	0	1	74	0	0	0	0	1	1	1	0	0	0	0	0	0	9	0
T_cells	0	0	6	0	0	0	111	0	59	0	16	0	0	0	0	0	0	0	0	550	0	0	2	6	0	0	2	0	0	0	0	0	0	0	0	0	0	1	0	0	0	0	0	0	0
Tissue_stem_cells	0	0	0	0	0	0	0	0	0	0	0	0	0	0	0	0	0	0	0	0	0	0	0	0	0	0	0	0	0	0	0	0	0	0	0	0	0	1	0	0	0	0	0	0	44

## Sheet: Table-cellType-PAUNSY-res2 5-20
	0	1	2	3	4	5	6	7	8	9	10	11	12	13	14	15	16	17	18	19	20	21	22	23	24	25	26	27	28	29	30	31	32	33	34	35	36	37	38	39	40	41
B_cell	0	1	0	0	0	8	0	0	0	0	0	0	1	0	0	0	14	19	0	1	0	9	90	600	61	1	0	0	0	1	0	0	182	33	0	0	30	1	164	0	0	0
BM	1	0	0	0	0	0	0	0	0	1	0	0	0	2	0	0	0	0	0	1	0	0	0	3	0	0	0	0	0	0	1	0	0	0	0	0	0	0	1	0	0	0
BM & Prog.	0	0	0	3	0	0	0	0	0	146	0	0	0	0	0	0	0	0	0	3	0	3	0	0	0	0	0	0	0	0	0	0	0	0	0	0	1	0	0	0	0	0
CMP	0	400	28	625	14	0	0	37	0	41	7	0	216	23	0	1	9	2	7	6	0	70	0	0	0	0	4	0	5	0	0	0	0	2	0	0	5	0	0	0	1	0
DC	0	0	0	0	0	3	0	0	0	0	0	0	1	0	0	0	0	4	0	0	4	1	1	0	0	0	0	2	0	0	0	0	0	0	0	0	2	8	0	0	0	0
Erythroblast	0	0	0	1	0	0	0	0	0	459	0	0	0	0	0	0	1	1	0	715	0	6	0	0	0	0	0	0	0	516	502	0	0	0	0	0	0	0	1	0	0	1
GMP	8	1052	1868	879	1225	426	1076	1250	0	2	1088	0	597	968	0	315	272	53	476	20	23	311	84	0	0	1	584	0	220	0	1	5	0	49	1	23	12	4	1	1	1	0
HSC_CD34+	0	44	1	1	0	1	0	0	0	2	0	0	41	0	0	0	1	0	0	1	0	29	15	0	0	0	0	4	0	0	0	10	0	0	0	5	33	3	1	0	0	0
Macrophage	0	0	0	0	0	1	0	0	0	0	0	0	0	0	0	0	0	0	0	0	0	0	0	0	0	0	0	0	0	0	0	0	0	0	0	0	0	0	0	0	0	0
MEP	0	20	0	74	0	0	0	0	0	470	0	0	1	1	0	1	1	1	1	5	0	8	0	0	0	0	0	0	0	0	0	0	0	0	0	0	14	1	0	0	0	0
Monocyte	0	96	8	8	0	975	137	4	1234	3	1	941	24	2	974	521	1	602	12	1	672	27	225	0	0	0	1	348	0	0	0	253	0	80	295	199	46	172	1	0	0	0
Myelocyte	0	4	0	0	0	0	4	0	0	0	0	0	2	0	9	1	0	0	2	0	0	0	0	0	0	0	0	0	0	0	0	1	0	0	0	3	0	0	0	0	0	0
Neutrophils	0	19	1	0	0	1	1	1	1	0	0	137	12	0	12	0	0	65	1	1	8	0	3	1	0	0	0	226	0	0	0	168	0	0	0	44	8	40	0	0	0	0
NK_cell	0	172	2	11	0	12	1	2	0	2	0	0	69	2	0	0	0	26	1	1	1	16	137	1	0	31	0	0	0	0	0	1	1	3	0	0	24	4	2	124	1	0
Osteoblasts	0	0	0	0	0	0	0	0	0	0	0	0	0	0	0	0	0	0	0	0	0	0	0	0	0	0	0	0	0	0	0	0	0	0	0	0	0	0	0	0	0	7
Platelets	0	0	0	0	0	0	0	0	0	0	0	0	0	0	0	0	0	0	0	0	0	0	0	0	1	0	0	0	0	0	0	0	0	0	0	0	0	0	0	0	0	0
Pre-B_cell_CD34-	0	8	1	1	0	9	18	2	1	0	0	0	3	1	7	27	4	15	11	1	1	3	59	2	2	0	0	2	0	0	0	5	2	125	1	16	16	2	1	0	0	0
Pro-B_cell_CD34+	2205	52	26	2	231	2	0	3	0	8	13	0	20	4	0	0	503	2	3	1	1	118	6	2	545	4	3	0	328	0	1	0	207	17	1	0	44	1	5	0	95	2
Pro-Myelocyte	0	86	18	6	0	0	85	10	0	1	0	0	35	8	0	6	4	8	250	0	0	28	0	0	0	0	1	0	0	1	2	0	0	1	0	4	0	0	0	0	0	0
T_cells	0	6	0	0	0	0	0	0	0	0	0	0	3	1	0	0	0	0	0	0	0	0	2	0	0	562	0	0	0	0	0	1	0	0	0	0	1	0	0	0	0	0
Tissue_stem_cells	0	0	0	0	0	0	0	0	0	0	0	0	0	0	0	0	0	0	0	0	0	0	0	0	0	0	0	0	0	0	0	0	0	0	0	0	1	0	0	0	0	44

## Sheet: Table-cellType-PAUMTZ-res2 5-20
	0	1	2	3	4	5	6	7	8	9	10	11	12	13	14	15	16	17	18	19	20	21	22	23	24	25	26	27	28	29	30	31	32	33	34	35	36	37	38	39	40	41	42	43	44	45	46	47
B_cell	0	0	0	0	0	0	0	0	0	0	1	1	92	0	0	1	0	0	36	0	0	10	0	3	0	0	201	0	47	1	1	0	0	295	281	0	0	0	0	0	0	0	166	6	0	0	0	0
BM	1	0	0	0	0	0	0	0	0	0	0	1	0	0	0	1	0	0	0	1	0	0	0	0	0	0	0	0	0	0	0	0	1	2	2	0	0	0	0	0	0	0	1	0	0	0	0	0
BM & Prog.	0	0	0	0	0	0	0	0	0	0	1	5	0	0	65	0	0	0	0	0	0	0	0	0	0	0	0	0	0	0	0	0	72	0	0	0	0	0	0	0	0	0	0	0	0	0	0	0
CMP	0	0	36	0	21	0	0	1	0	0	16	1	0	31	62	0	10	0	0	0	0	11	0	4	0	0	0	14	1	1	1	1	0	0	0	35	4	5	0	8	0	0	0	0	0	0	3	0
DC	0	0	0	0	1	0	0	0	4	0	1	0	1	0	0	0	0	0	0	0	0	0	0	0	1	0	0	0	1	0	11	0	0	0	0	0	0	0	0	0	0	4	0	0	1	0	0	0
Erythroblast	0	0	0	0	0	0	0	0	0	0	1	647	0	0	193	0	0	0	0	557	552	0	0	0	0	0	0	0	0	0	0	0	181	0	0	0	0	0	0	0	0	0	1	0	0	0	0	0
GMP	1	1	664	1	462	0	15	168	13	11	74	0	88	506	16	0	395	0	0	0	0	171	1	97	0	0	0	305	39	2	22	33	0	0	0	59	78	33	0	107	32	27	1	0	13	0	60	0
HSC_-G-CSF	0	0	0	0	0	0	0	0	0	2	0	0	0	0	0	0	0	1	0	0	0	0	0	0	0	0	0	0	0	0	0	0	0	0	0	0	0	0	0	0	0	0	0	0	0	0	0	0
HSC_CD34+	0	0	1	0	4	0	0	0	0	0	34	0	18	0	7	0	0	0	0	0	0	2	1	0	3	0	0	0	11	1	9	0	0	0	1	3	0	0	0	3	1	0	1	0	0	0	5	0
Macrophage	0	0	0	0	0	0	1	0	0	0	0	0	0	0	0	0	0	0	0	0	0	0	0	0	0	0	0	0	0	0	0	0	0	0	0	0	0	0	0	0	0	0	0	0	0	0	0	0
MEP	0	0	3	0	1	0	0	0	0	0	15	12	0	3	259	1	1	0	0	1	0	1	0	0	0	0	0	0	0	0	0	0	54	0	0	0	0	0	0	0	0	0	0	0	0	0	0	0
Monocyte	0	1294	97	978	284	773	684	340	690	328	362	0	230	24	4	0	23	443	0	0	0	2	342	1	265	411	0	23	97	278	220	247	0	0	0	37	0	0	203	7	131	145	0	0	118	0	10	0
Myelocyte	0	0	6	0	0	0	0	1	0	32	0	0	0	0	0	0	0	2	0	0	0	0	2	0	0	0	0	0	0	1	0	0	0	0	0	3	0	0	0	0	2	0	0	0	0	0	0	0
Neutrophils	0	4	1	112	0	0	5	5	30	20	116	0	3	2	0	0	0	33	0	0	0	0	148	0	197	21	0	0	2	50	41	3	0	1	0	5	0	0	1	0	5	5	0	0	0	0	1	0
NK_cell	0	0	3	0	2	0	0	0	2	0	14	0	140	0	1	122	1	0	0	0	0	0	0	0	0	0	1	2	19	2	10	0	0	0	1	10	0	1	0	0	0	1	2	0	0	0	1	0
Osteoblasts	0	0	0	0	0	0	0	0	0	0	0	0	0	0	0	0	0	0	0	0	0	0	0	0	0	0	0	0	0	0	0	0	0	0	0	0	0	0	0	0	0	0	0	0	0	0	0	7
Platelets	0	0	0	0	0	0	0	0	0	0	0	0	0	0	0	0	0	0	0	0	0	0	0	0	0	0	1	0	0	0	0	0	0	0	0	0	0	0	0	0	0	0	0	0	0	0	0	0
Pre-B_cell_CD34-	0	21	99	2	22	3	44	96	2	110	13	0	65	20	1	0	19	85	1	0	0	7	3	1	2	0	2	1	115	7	5	2	0	0	3	3	3	0	1	4	18	1	1	1	0	0	4	0
Pro-B_cell_CD34+	2222	0	13	0	6	0	0	0	0	0	36	0	9	4	1	3	1	0	533	7	0	311	0	380	0	0	220	2	24	0	2	0	5	0	1	65	116	171	1	45	1	0	5	138	0	113	2	2
Pro-Myelocyte	0	2	340	0	185	0	8	143	0	234	6	0	0	36	3	0	157	21	0	1	0	26	0	10	0	0	0	16	0	4	0	29	0	0	0	16	9	0	0	27	4	1	0	0	0	0	3	0
T_cells	0	0	0	0	1	0	0	0	0	0	0	0	2	0	0	482	0	0	0	0	0	0	1	0	0	0	0	0	1	0	0	0	0	0	3	0	0	0	0	0	0	0	0	0	0	0	0	0
Tissue_stem_cells	0	0	0	0	0	0	0	0	0	0	1	0	0	0	0	0	0	0	0	0	0	0	0	0	0	0	0	0	0	0	0	0	0	0	0	0	0	0	0	0	0	0	0	0	0	0	0	44

## Sheet: Table-cellType-PARBIU-res2 5-20
	0	1	2	3	4	5	6	7	8	9	10	11	12	13	14	15	16	17	18	19	20	21	22	23	24	25	26	27	28	29	30	31	32	33	34	35	36	37	38	39	40	41	42	43	44	45	46
B_cell	0	0	0	0	0	0	6	0	2	1	0	1	1	0	3	14	0	6	0	1	92	69	0	12	1	0	0	0	0	0	171	43	0	298	0	2	271	0	0	0	5	0	0	165	0	0	0
BM	1	0	0	0	0	0	0	0	0	0	0	0	0	0	0	0	0	0	0	1	0	0	0	0	1	1	0	0	0	0	0	0	2	4	0	0	0	0	0	0	0	0	0	0	0	0	0
BM & Prog.	0	0	0	0	0	0	0	0	0	0	0	0	0	0	2	0	0	1	0	9	0	0	0	0	0	0	0	0	58	0	0	0	70	0	0	0	0	0	0	0	0	0	0	0	0	0	0
CMP	0	4	0	2	0	3	1	0	0	1	0	2	0	1	7	21	1	17	0	6	0	0	0	1	0	0	2	2	32	0	0	2	0	0	1	0	0	19	0	1	0	0	7	0	0	3	0
DC	0	2	0	1	0	3	0	1	0	1	0	0	1	5	0	3	4	0	2	0	1	0	0	0	0	0	0	0	0	0	0	1	0	0	0	15	0	0	0	1	0	0	0	0	0	0	0
Erythroblast	0	0	0	0	0	0	0	0	0	0	0	0	0	0	0	0	0	1	0	606	0	0	615	0	0	578	0	0	148	0	0	0	181	0	0	0	0	0	0	0	0	0	0	1	0	0	0
GMP	0	1296	5	966	2	962	671	559	639	3	448	638	429	33	610	417	338	235	113	0	86	0	0	310	0	0	505	400	1	8	0	38	1	0	26	17	0	24	161	35	6	0	149	1	0	3	0
HSC_-G-CSF	0	0	0	0	0	0	0	0	0	0	0	0	0	0	0	2	0	0	0	0	0	0	0	0	0	0	0	0	0	0	0	0	0	0	0	0	0	0	0	0	0	0	0	0	0	0	0
HSC_CD34+	0	0	0	1	0	0	0	0	0	7	0	0	0	0	3	2	0	31	0	1	18	0	0	1	0	0	2	0	4	1	0	9	0	0	15	6	1	4	0	0	0	0	0	1	0	1	0
Macrophage	0	0	0	0	0	0	0	0	0	0	0	0	0	0	0	1	0	0	0	0	0	0	0	0	0	0	0	0	0	0	0	0	0	0	0	0	0	0	0	1	0	0	0	0	0	0	0
MEP	0	4	0	0	0	0	1	0	0	0	0	0	0	0	2	0	0	13	0	28	0	0	0	0	0	1	0	0	244	0	0	0	50	0	0	0	0	3	0	1	0	0	0	0	0	1	0
Monocyte	0	242	1371	184	1068	176	339	405	240	483	285	179	362	703	11	208	376	230	517	1	232	0	0	1	0	0	15	12	1	0	0	93	0	0	176	200	0	0	9	143	0	183	7	1	133	0	0
Myelocyte	0	0	0	0	0	0	0	0	0	1	0	0	0	0	0	0	0	0	0	0	0	0	0	0	0	0	0	0	0	0	0	0	0	0	0	0	0	0	0	2	0	0	0	0	0	0	0
Neutrophils	0	0	7	2	124	0	2	0	0	364	9	0	0	11	0	3	0	43	0	0	3	0	0	0	0	0	0	0	0	0	0	2	0	1	71	39	0	0	0	1	0	0	0	0	24	0	0
NK_cell	0	5	0	0	0	7	10	2	4	1	1	4	4	1	1	44	6	22	0	0	140	0	0	0	118	0	0	0	0	0	1	19	0	1	4	8	0	1	0	1	0	0	1	2	0	0	0
Osteoblasts	0	0	0	0	0	0	0	0	0	0	0	0	0	0	0	0	0	0	0	0	0	0	0	0	0	0	0	0	0	0	0	0	0	0	0	0	0	0	0	0	0	0	0	0	0	0	7
Platelets	0	0	0	0	0	0	0	0	0	0	0	0	0	0	0	0	0	0	0	0	0	0	0	0	0	0	0	0	0	0	1	0	0	0	0	0	0	0	0	0	0	0	0	0	0	0	0
Pre-B_cell_CD34-	0	27	17	82	0	6	19	22	13	4	56	1	4	0	1	6	5	23	19	0	61	2	0	3	0	0	5	48	1	0	1	118	0	1	5	4	2	0	20	17	1	1	7	1	2	0	0
Pro-B_cell_CD34+	2241	1	0	0	0	0	0	0	1	0	0	2	0	2	98	8	0	45	0	0	9	548	0	282	4	8	12	0	1	400	211	21	4	0	0	3	0	204	0	1	176	1	0	5	0	147	2
Pro-Myelocyte	0	27	2	81	0	4	13	26	11	0	57	2	4	0	8	11	5	13	12	0	0	0	0	0	0	1	15	90	4	0	0	0	0	0	2	1	0	0	30	3	0	0	13	0	0	0	0
T_cells	0	0	0	0	0	0	0	0	1	1	0	0	0	0	0	1	0	1	0	0	2	0	0	0	478	0	0	0	0	0	0	1	0	0	0	0	0	0	0	0	0	0	0	0	0	0	0
Tissue_stem_cells	0	0	0	0	0	0	0	0	0	0	0	0	0	0	0	0	0	1	0	1	0	0	0	0	0	0	0	0	0	0	0	0	0	0	0	0	0	0	0	0	0	0	0	0	0	0	43

## Sheet: Table-cellType-PAPZCL-res2 5-20
	0	1	2	3	4	5	6	7	8	9	10	11	12	13	14	15	16	17	18	19	20	21	22	23	24	25	26	27	28	29	30	31	32	33	34	35	36	37	38	39	40	41	42	43
B_cell	0	0	0	0	1	0	0	0	0	0	0	0	1	92	1	68	0	8	8	0	1	2	1	0	190	0	2	0	0	270	278	0	23	0	0	0	0	0	26	0	0	163	0	0
BM	1	0	0	0	0	0	0	0	2	0	0	0	1	0	0	0	0	0	0	0	0	0	0	1	0	0	0	0	0	5	0	0	0	0	0	0	0	0	0	0	0	0	0	0
BM & Prog.	0	0	0	0	0	0	0	0	134	0	0	0	4	0	0	0	0	0	0	0	0	0	0	0	0	0	0	0	0	0	0	0	0	0	1	0	0	0	1	0	0	0	0	0
CMP	0	634	811	0	305	404	684	0	26	0	276	317	3	0	172	0	0	198	162	0	0	247	0	0	0	104	2	253	0	0	0	2	2	0	26	3	1	8	6	0	70	0	0	0
DC	0	0	0	0	0	0	0	0	0	1	0	0	0	1	0	0	0	0	0	1	0	0	0	0	0	0	13	0	7	0	0	0	0	0	0	0	1	0	1	0	0	0	0	0
Erythroblast	0	0	0	0	0	0	0	0	451	0	0	0	621	0	0	0	607	0	0	0	0	0	0	450	0	0	0	0	0	0	0	0	0	0	0	0	0	0	1	0	0	1	0	0
GMP	0	692	480	2	941	812	579	0	0	0	487	344	0	88	406	0	0	65	64	1	0	120	5	0	0	226	29	19	28	2	0	8	39	0	9	19	31	165	5	0	104	1	0	0
HSC_CD34+	0	2	5	0	1	1	0	0	3	6	0	0	0	15	0	0	0	0	0	0	0	1	2	0	0	0	12	0	0	1	0	10	0	0	10	0	0	1	29	0	0	1	0	0
Macrophage	0	0	0	0	1	0	0	0	0	0	0	0	0	0	0	0	0	0	0	0	0	0	0	0	0	0	0	0	0	0	0	0	0	0	0	0	0	0	0	0	0	0	0	0
MEP	0	1	2	0	0	0	0	0	308	1	1	0	21	0	0	0	0	0	0	0	0	0	0	0	0	0	0	28	0	0	0	0	0	0	7	0	0	1	16	0	0	0	1	0
Monocyte	0	1	20	1318	3	11	2	1029	0	463	0	1	1	228	1	0	0	0	0	500	0	0	377	0	0	1	197	2	253	0	0	159	68	0	1	0	156	11	34	187	2	1	0	0
Myelocyte	0	0	0	0	0	0	0	0	0	1	0	0	0	0	0	0	0	0	0	0	0	0	0	0	0	0	0	0	0	0	0	0	0	0	0	0	2	0	0	0	0	0	0	0
Neutrophils	0	0	10	6	0	3	1	122	0	346	0	0	0	3	0	0	0	0	0	19	0	0	84	0	0	0	36	0	0	0	1	66	0	0	1	0	1	1	3	0	0	0	0	0
NK_cell	0	11	9	0	72	41	0	0	0	0	13	0	0	141	39	0	0	0	0	0	18	1	1	0	2	8	10	2	1	1	0	2	1	0	2	0	0	1	21	0	7	2	99	0
Osteoblasts	0	0	0	0	0	0	0	0	0	0	0	0	0	0	0	0	0	0	0	0	0	0	0	0	0	0	0	0	0	0	0	0	0	0	0	0	0	0	0	0	0	0	0	7
Platelets	0	0	0	0	0	0	0	0	0	0	0	0	0	0	0	1	0	0	0	0	0	0	0	0	0	0	0	0	0	0	0	0	0	0	0	0	0	0	0	0	0	0	0	0
Pre-B_cell_CD34-	0	0	1	14	0	2	0	0	1	3	0	0	0	60	0	0	0	0	1	0	0	0	9	0	2	0	5	0	0	3	0	5	103	0	0	0	18	9	16	1	0	1	0	0
Pro-B_cell_CD34+	2220	16	14	0	3	6	8	0	8	0	6	2	1	9	2	550	0	302	298	0	2	112	0	5	207	1	11	1	2	1	0	0	16	252	189	193	1	1	42	1	1	3	1	2
Pro-Myelocyte	0	0	0	0	0	0	0	0	4	0	0	0	0	0	0	0	0	0	0	0	0	0	0	1	0	0	1	0	0	0	0	1	0	0	0	0	3	12	0	0	0	0	0	0
T_cells	0	0	1	0	1	1	0	0	0	1	0	0	0	2	0	0	0	0	0	0	475	0	0	0	0	0	0	0	0	0	1	0	0	0	0	0	0	0	1	0	0	0	2	0
Tissue_stem_cells	0	0	1	0	0	0	0	0	1	0	0	0	0	0	0	0	0	0	0	0	0	0	0	0	0	0	0	0	0	0	0	0	0	0	0	0	0	0	0	0	0	0	0	43

## Sheet: Table-cellType-TCH6-res2 5-2023
	0	1	2	3	4	5	6	7	8	9	10	11	12	13	14	15	16	17	18	19	20	21	22	23	24	25	26	27	28	29	30	31	32	33	34	35	36	37	38	39	40	41	42	43
B_cell	0	0	0	0	0	1	0	1	0	0	0	18	0	31	84	2	0	0	196	2	2	0	316	0	1	262	0	0	24	4	0	0	164	0	0	0	0	0	0	0	18	8	0	0
BM	0	1	0	0	0	0	0	1	0	0	0	0	0	0	0	1	0	1	0	0	0	0	1	2	0	3	0	0	0	0	0	0	0	0	1	0	0	0	0	0	0	0	0	0
BM & Prog.	0	0	0	0	0	0	0	6	0	0	60	0	0	0	0	0	0	0	0	0	0	0	0	72	0	0	0	0	0	2	0	0	0	0	0	0	0	0	0	0	0	0	0	0
CMP	0	0	0	0	0	228	0	4	121	0	10	23	0	0	0	0	162	0	0	1	0	22	0	0	0	0	0	1	0	34	1	0	0	0	114	61	0	0	1	0	0	0	0	0
DC	0	0	0	1	0	0	0	0	0	1	0	0	0	0	1	0	0	0	0	0	16	0	0	0	0	0	4	0	0	0	0	1	0	0	0	0	0	0	0	0	1	0	0	0
Erythroblast	0	0	0	0	0	0	0	610	0	0	302	0	581	0	0	0	0	458	0	0	0	0	0	177	0	0	0	0	0	1	0	0	1	0	0	0	0	0	0	0	0	0	1	0
GMP	0	0	0	0	0	423	11	0	467	0	0	85	0	0	86	0	290	0	0	0	30	250	0	0	0	0	25	8	34	13	21	34	1	5	14	57	0	0	2	0	2	3	0	0
HSC_CD34+	0	0	0	6	0	1	0	1	2	0	4	0	0	0	5	0	0	0	0	2	13	0	0	0	0	1	0	13	0	26	0	0	1	3	0	1	0	0	0	0	9	13	0	0
Macrophage	0	0	0	0	0	0	0	0	0	0	0	0	0	0	0	0	0	0	0	0	0	0	0	0	0	0	0	0	0	0	0	1	0	0	0	0	0	0	0	0	0	0	0	0
MEP	0	0	0	0	0	1	0	28	0	0	236	0	1	0	0	0	0	0	0	0	0	1	0	55	0	0	0	0	0	21	0	1	0	0	10	2	0	0	0	0	0	0	0	0
Monocyte	0	0	956	474	698	10	599	1	10	582	0	0	0	0	205	1	7	0	0	0	244	12	0	0	249	0	236	163	74	7	0	154	1	129	20	10	135	0	0	0	19	23	0	53
Myelocyte	0	0	0	1	0	0	0	0	0	0	0	0	0	0	0	0	0	0	0	0	0	0	0	0	0	0	0	0	0	0	0	2	0	0	0	0	0	0	0	0	0	0	0	0
Neutrophils	0	0	109	347	2	0	2	0	5	36	0	0	0	0	1	0	0	0	0	0	52	1	1	0	37	0	0	72	0	2	0	0	0	31	0	1	0	0	0	0	2	2	0	0
NK_cell	0	0	0	0	0	2	0	0	3	0	1	0	0	0	114	19	2	0	1	0	11	1	0	0	0	1	2	1	3	5	0	0	2	0	0	1	0	108	0	0	16	26	0	0
Osteoblasts	0	0	0	0	0	0	0	0	0	0	0	0	0	0	0	0	0	0	0	0	0	0	0	0	0	0	0	0	0	0	0	0	0	0	0	0	0	0	0	0	0	0	7	0
Platelets	0	0	0	0	0	0	0	0	0	0	0	0	0	1	0	0	0	0	0	0	0	0	0	0	0	0	0	0	0	0	0	0	0	0	0	0	0	0	0	0	0	0	0	0
Pre-B_cell_CD34-	0	0	0	3	0	1	35	0	12	0	1	1	0	0	63	0	1	0	3	0	5	11	0	0	2	3	0	3	106	1	0	17	1	5	1	1	1	4	0	0	10	0	0	0
Pro-B_cell_CD34+	1149	1096	0	0	0	2	0	0	3	0	1	485	0	543	7	3	2	1	209	375	5	2	0	3	0	1	2	0	19	111	196	1	3	0	0	1	1	0	109	97	3	3	2	0
Pro-Myelocyte	0	0	0	0	0	4	6	0	7	0	2	1	0	0	0	0	0	0	0	0	1	20	0	0	0	0	0	1	1	0	0	2	0	0	1	1	0	0	0	0	0	0	0	0
T_cells	0	0	0	1	0	0	0	0	0	0	0	1	0	0	1	479	0	0	0	0	0	0	0	0	0	0	0	0	0	0	0	0	0	0	0	0	0	1	0	0	1	1	0	0
Tissue_stem_cells	0	0	0	0	0	0	0	0	0	0	0	0	0	0	0	0	0	0	0	0	0	0	0	0	0	0	0	1	0	0	0	0	0	0	0	0	0	0	0	0	0	0	44	0

## Sheet: Table-cellType-TCH5-res2 5-2023
	0	1	2	3	4	5	6	7	8	9	10	11	12	13	14	15	16	17	18	19	20	21	22	23	24	25	26	27	28	29	30	31	32	33	34	35	36	37	38	39	40	41
B_cell	0	0	1	0	0	0	0	0	38	0	0	8	0	83	0	1	198	0	0	1	2	329	0	0	0	0	37	12	1	240	0	18	0	0	0	0	163	1	0	0	0	0
BM	0	0	0	1	0	0	0	1	0	0	0	0	0	0	0	1	0	2	0	1	0	1	0	3	0	0	0	0	0	2	0	0	0	0	0	0	0	0	0	0	0	0
BM & Prog.	0	0	0	0	0	0	58	0	0	0	0	0	0	0	0	10	0	0	0	0	0	0	0	73	0	0	0	0	0	0	0	0	0	0	0	0	0	0	0	0	0	0
CMP	0	0	0	2	0	0	46	7	0	1	0	9	0	0	0	3	0	0	0	0	0	0	0	0	0	20	1	0	0	0	0	4	4	8	0	0	0	0	0	1	0	0
DC	0	0	0	0	0	0	0	0	0	1	1	0	1	1	0	0	0	0	0	0	14	0	0	0	4	0	1	0	0	0	1	1	0	0	0	0	0	0	0	0	0	0
Erythroblast	0	0	901	0	0	0	323	0	0	0	0	1	0	0	0	346	0	391	0	0	0	0	0	175	0	0	0	0	0	0	0	0	0	0	0	0	0	0	0	0	0	0
GMP	0	0	0	0	2	0	0	479	0	5	0	170	0	86	337	0	0	0	2	0	30	0	218	0	29	29	30	14	2	0	38	9	161	162	0	2	1	0	0	60	0	0
HSC_CD34+	0	0	0	0	0	0	1	0	0	15	0	4	4	4	0	8	0	0	0	0	10	1	0	0	0	8	3	0	0	0	0	36	0	0	0	3	1	0	0	0	0	0
Macrophage	0	0	0	0	0	0	0	0	0	0	0	0	0	0	1	0	0	0	0	0	0	0	0	0	0	0	0	0	0	0	0	0	0	0	0	0	0	0	0	0	0	0
MEP	0	0	0	1	0	0	247	0	0	0	0	1	0	0	0	41	0	0	0	0	0	0	2	49	0	5	0	0	0	0	0	2	1	1	0	0	0	0	0	0	0	0
Monocyte	0	948	0	0	673	691	2	39	0	345	543	0	333	207	44	0	0	0	0	0	230	0	31	0	258	0	70	0	0	0	173	48	15	11	184	132	1	135	0	0	0	0
Myelocyte	0	0	0	0	0	0	0	0	0	1	0	0	0	0	0	0	0	0	0	0	0	0	0	0	0	0	0	0	0	0	2	0	0	0	0	0	0	0	0	0	0	0
Neutrophils	0	104	0	0	8	1	0	3	0	216	35	0	223	1	0	0	0	0	0	0	46	1	2	0	0	1	1	0	0	0	1	4	0	1	0	36	0	19	0	0	0	0
NK_cell	0	0	0	0	0	0	0	1	0	2	0	0	1	115	0	0	1	0	0	3	9	0	1	0	1	2	4	0	116	1	1	43	1	1	0	0	2	0	0	0	0	0
Osteoblasts	0	0	0	0	0	0	0	0	0	0	0	0	0	0	0	0	0	0	0	0	0	0	0	0	0	0	0	0	0	0	0	0	0	0	0	0	0	0	0	0	7	0
Platelets	0	0	0	0	0	0	0	0	1	0	0	0	0	0	0	0	0	0	0	0	0	0	0	0	0	0	0	0	0	0	0	0	0	0	0	0	0	0	0	0	0	0
Pre-B_cell_CD34-	0	0	0	0	16	0	0	76	0	4	0	15	3	58	35	0	3	0	0	0	3	0	35	1	0	0	112	1	2	3	19	6	19	7	1	6	1	2	0	1	0	0
Pro-B_cell_CD34+	1561	0	0	718	0	0	3	0	557	0	0	349	0	9	0	1	197	0	362	3	3	0	0	4	2	215	18	240	1	1	1	47	0	2	1	0	5	0	98	24	2	9
Pro-Myelocyte	0	0	0	0	0	0	3	41	0	0	0	10	0	0	21	1	0	0	0	0	1	0	28	0	0	0	0	0	0	0	3	0	13	12	0	0	0	0	0	4	0	0
T_cells	0	0	0	0	0	0	0	0	0	0	0	0	1	1	0	0	0	0	0	346	0	0	0	0	0	0	0	0	135	0	0	2	0	0	0	0	0	0	0	0	0	0
Tissue_stem_cells	0	0	0	0	0	0	0	0	0	1	0	0	0	0	0	0	0	0	0	0	0	0	0	0	0	0	0	0	0	0	0	0	0	0	0	0	0	0	0	0	44	0

## Sheet: Table-cellType-TCH4-res2 5-2023
	0	1	2	3	4	5	6	7	8	9	10	11	12	13	14	15	16	17	18	19	20	21	22	23	24	25	26	27	28	29	30	31	32	33	34	35	36	37	38	39	40	41
B_cell	0	0	0	0	0	0	0	92	68	1	0	0	0	16	0	0	1	192	2	1	0	340	0	0	0	1	22	0	2	215	0	0	0	162	0	0	0	22	4	0	0	0
BM	1	0	0	0	0	0	5	0	0	1	0	4	1	0	0	0	2	0	0	0	0	1	0	0	0	0	0	1	0	3	0	0	0	1	0	1	0	0	0	0	0	0
BM & Prog.	0	0	0	98	0	0	0	0	0	7	0	0	1	0	0	0	0	0	0	0	0	0	0	0	0	0	0	0	0	0	0	0	0	0	0	43	0	0	1	0	0	0
CMP	0	0	0	38	0	0	0	0	0	7	0	0	295	1	297	0	2	0	7	0	1	0	0	16	0	0	2	5	0	0	0	1	0	0	27	0	4	0	4	0	0	0
DC	0	0	0	0	0	1	0	1	0	0	0	0	0	0	0	1	0	0	0	0	0	0	1	0	4	0	0	0	13	0	0	0	0	0	0	0	0	1	0	0	3	0
Epithelial_cells	0	0	0	0	0	0	0	0	0	0	0	0	0	0	1	0	0	0	0	0	0	0	0	0	0	0	0	0	0	0	0	0	0	0	0	0	0	0	0	0	0	0
Erythroblast	0	0	0	341	0	0	650	0	0	582	0	549	0	0	0	0	0	0	0	0	0	0	0	0	0	0	0	0	0	0	0	0	0	0	0	61	0	0	1	0	0	0
GMP	0	0	0	0	0	0	0	91	0	0	0	0	67	5	41	0	5	0	7	0	10	0	38	208	25	0	31	37	23	4	0	6	0	1	20	0	2	4	2	0	1	0
HSC_CD34+	0	0	0	3	0	4	0	19	0	1	0	0	2	0	0	0	0	0	5	0	16	1	0	0	0	0	0	0	8	0	0	3	0	1	6	0	0	11	18	0	0	0
Macrophage	0	0	0	0	0	0	0	0	0	0	1	0	0	0	0	0	0	0	0	0	0	0	0	0	0	0	0	0	0	0	0	0	0	0	0	0	0	0	0	0	0	0
MEP	0	0	0	278	0	0	0	0	0	24	0	0	137	1	164	0	0	0	5	0	0	0	1	2	0	1	0	0	0	0	0	0	0	0	3	34	0	0	16	0	0	0
Monocyte	0	958	0	0	706	403	0	229	0	0	583	0	10	0	15	462	2	0	0	273	204	0	205	14	247	0	73	0	167	0	177	150	184	1	1	0	0	24	6	0	56	0
Myelocyte	0	0	0	0	0	0	0	0	0	0	0	0	0	0	0	0	0	0	0	0	1	0	2	0	0	0	0	0	0	0	0	0	0	0	0	0	0	0	0	0	0	0
Neutrophils	0	119	0	0	0	292	0	3	0	0	5	0	0	0	0	6	0	0	0	68	107	1	1	1	0	0	0	0	18	0	24	32	0	0	1	0	0	2	1	0	22	0
NK_cell	0	0	0	0	0	0	0	140	0	0	0	0	4	0	7	0	10	1	1	1	2	0	0	4	2	119	1	1	6	2	0	0	0	2	7	0	0	19	3	0	1	0
Osteoblasts	0	0	0	0	0	0	0	0	0	0	0	0	0	0	0	0	0	0	0	0	0	0	0	0	0	0	0	0	0	0	0	0	0	0	0	0	0	0	0	0	0	7
Platelets	0	0	0	0	0	0	0	0	0	0	0	0	0	0	1	0	0	0	0	0	0	0	0	0	0	0	0	0	0	0	0	0	0	0	0	0	0	0	0	0	0	0
Pre-B_cell_CD34-	0	0	0	1	0	2	0	59	3	0	11	0	3	4	1	0	6	1	0	5	4	0	36	21	0	7	105	2	3	4	0	8	1	2	1	0	0	15	1	0	0	0
Pro-B_cell_CD34+	1170	0	1048	3	0	0	0	12	560	1	0	0	7	515	0	0	4	194	353	0	0	0	2	2	1	1	18	198	1	2	0	0	1	3	97	2	122	4	40	99	1	1
Pro-Myelocyte	0	0	0	3	0	0	1	0	0	0	0	3	9	0	7	0	0	0	1	0	0	0	6	18	0	0	1	1	0	0	0	0	0	0	1	0	0	0	0	0	1	0
T_cells	0	0	0	0	0	1	0	2	0	0	0	0	2	0	0	0	395	0	0	0	0	0	0	0	0	132	0	1	0	0	0	0	0	0	0	0	0	1	0	0	0	0
Tissue_stem_cells	0	0	0	1	0	0	0	0	0	0	0	0	0	0	0	0	0	0	0	0	0	0	0	0	0	0	0	0	0	0	0	0	0	0	0	0	0	0	1	0	0	43

[truncated: 6 more sheets: Table-cellType-TCH3-res2 5-2023, Table-cellType-TCH2-res2 5-2023, Table-cellType-TCH1-res2 5-2023, Sheet1, Sheet2, Sheet3]
