# Supplementary material for: Pediatric acute myeloid leukemia tumor composition predicts patient outcomes at diagnosis and reveals mechanisms of resistance to chemotherapy
Source: Research Square preprint supplement (doi:10.21203/rs.3.rs-4669225/v1), 2026-01-23
Supplement: Supplementary file 12 [file f49c90e38bcd3f61e0141dc3.xlsx]

## Sheet: PAVTLN-ALL-9vsD
gene_sym	p_val	avg_log2FC	pct.1	pct.2	p_val_adj
GYPC	0	2.44039	0.773	0.007	0
EEF1B2	0	2.24589	0.96	0.21	0
MTRNR2L12	0	-3.06499	0.685	0.998	0
CCNL1	0	-1.81506	0.921	0.994	0
CYTL1	0	2.36211	0.655	0	0
BTF3	0	2.38175	0.955	0.173	0
RAB32	0	2.24197	0.851	0.058	0
NUCB2	0	2.3314	0.885	0.097	0
MALAT1	0	-2.06155	1	1	0
RNASEH2C	0	2.42711	0.949	0.139	0
PDZD8	0	2.2437	0.825	0.05	0
MGST1	0	2.88918	0.872	0.008	0
LDHB	0	2.3317	0.861	0.102	0
EBPL	0	2.24461	0.771	0.033	0
COMMD6	0	2.19367	0.915	0.13	0
NME2	0	2.37171	0.922	0.144	0
MPO	0	3.28774	0.729	0	0
CST7	0	3.49027	0.974	0	0
PRSS57	0	3.29042	0.915	0.004	0
PRTN3	0	4.12744	0.978	0.005	0
ELANE	0	2.9417	0.716	0	0
SMIM24	0	2.24425	0.727	0.004	0
MT-CO1	0	-1.7295	1	1	0
MT-CO2	0	-1.70668	1	1	0
MT-ATP6	0	-1.64884	1	0.999	0
MT-CO3	0	-1.58113	1	1	0
MT-ND3	0	-1.81912	1	1	0
MT-ND4	0	-1.64832	0.997	1	0
SNHG29	0	2.56617	0.997	0.209	0
UXT	4.97976e-304	2.1218	0.817	0.086	1.03201e-299
TALDO1	6.92206e-303	2.09791	0.861	0.112	1.43453e-298
ZEB2	1.79594e-297	-2.52379	0.636	0.976	3.7219e-293
PRDX5	1.88794e-296	2.09981	0.866	0.11	3.91256e-292
MT-ND4L	7.2776e-296	-2.02336	0.918	0.991	1.50821e-291
RNASE3	1.23941e-293	2.33454	0.668	0.019	2.56854e-289
MZT2B	9.83346e-293	2.05621	0.882	0.139	2.03789e-288
NDUFS5	1.70955e-289	1.95505	0.873	0.123	3.54286e-285
MT-ND5	2.26401e-289	-1.70242	0.973	0.994	4.69193e-285
NACA	7.85749e-289	1.84856	0.983	0.303	1.62839e-284
EIF3E	1.09802e-288	2.07177	0.924	0.177	2.27554e-284
RTRAF	5.21263e-286	1.99967	0.808	0.095	1.08027e-281
GNG5	9.84045e-286	1.92767	0.892	0.137	2.03934e-281
NPW	1.12682e-285	2.15248	0.645	0.014	2.33522e-281
FOSB	2.67458e-285	-1.69956	0.947	0.977	5.5428e-281
COX7A2	1.98551e-284	1.97568	0.838	0.109	4.11478e-280
AHNAK	5.83606e-284	-3.33725	0.329	0.95	1.20946e-279
CLU	2.57905e-282	2.13556	0.672	0.029	5.34483e-278
MT-CYB	7.29768e-279	-1.40516	0.994	0.996	1.51237e-274
COX7C	8.10575e-279	1.93422	0.941	0.158	1.67984e-274
ATP5PO	3.528e-278	1.96173	0.785	0.085	7.31142e-274
MT-ND2	4.15932e-277	-1.33818	0.999	0.999	8.61978e-273
NEAT1	7.98892e-276	-1.59569	0.984	0.988	1.65562e-271
SERPINB1	1.64567e-275	1.97671	0.975	0.221	3.41048e-271
RNASE2	1.87093e-274	2.11162	0.823	0.109	3.87731e-270
GIHCG	1.28305e-273	1.96178	0.899	0.147	2.659e-269
MT-ND1	2.48125e-273	-1.27527	1	0.999	5.14214e-269
HNRNPU	3.7322e-273	-1.74913	0.902	0.972	7.73461e-269
XIST	6.06987e-272	-1.85733	0.866	0.979	1.25792e-267
NPM1	9.35714e-271	1.9658	0.913	0.184	1.93917e-266
PRDX6	3.54215e-269	1.88721	0.798	0.097	7.34075e-265
RPS5	4.17942e-268	1.7304	0.978	0.321	8.66142e-264
LRRC75A	3.96732e-267	2.22079	0.622	0.024	8.22188e-263
EIF3K	8.02328e-267	1.90357	0.885	0.153	1.66274e-262
UQCRH	1.45744e-264	1.90601	0.928	0.187	3.0204e-260
VIM	2.14366e-263	-1.08964	0.999	0.983	4.44252e-259
TXN	4.13169e-259	1.86476	0.948	0.195	8.56251e-255
RPL23A	1.68881e-258	1.87171	0.983	0.242	3.49989e-254
NPC2	7.52947e-258	1.83764	0.76	0.087	1.56041e-253
OSTC	8.67461e-258	1.86292	0.72	0.068	1.79773e-253
PLCG2	2.44778e-257	-3.59677	0.196	0.907	5.07277e-253
NDUFA4	3.11248e-257	1.80598	0.889	0.152	6.4503e-253
ATP5PF	3.86407e-257	1.81077	0.772	0.094	8.0079e-253
COX7A2L	5.64613e-256	1.86889	0.722	0.072	1.1701e-251
IMPDH2	5.8405e-256	1.82331	0.722	0.064	1.21039e-251
AHR	2.97001e-252	-3.39116	0.186	0.884	6.15504e-248
EIF3L	1.25302e-251	1.87637	0.766	0.104	2.59675e-247
HNRNPA2B1	1.32774e-250	-1.52255	0.913	0.957	2.75162e-246
SPCS1	1.34767e-250	1.78753	0.786	0.102	2.79291e-246
NFKBIZ	1.76316e-250	-2.91676	0.375	0.907	3.65397e-246
RPL12	6.1465e-249	1.80141	0.996	0.285	1.2738e-244
ALKBH7	9.77519e-249	1.83053	0.723	0.074	2.02581e-244
SUMO2	2.42968e-247	1.79379	0.876	0.165	5.03526e-243
MTRNR2L8	8.16939e-247	-2.48295	0.501	0.932	1.69302e-242
RAB11FIP1	6.6925e-246	-2.00406	0.74	0.947	1.38695e-241
TRA2B	6.84444e-246	-1.74545	0.821	0.946	1.41844e-241
SF3B6	4.501e-245	1.80563	0.857	0.15	9.32786e-241
APRT	4.58221e-244	1.7785	0.85	0.147	9.49617e-240
TRGC1	5.90948e-244	1.76837	0.677	0.052	1.22468e-239
COX5A	1.83562e-243	1.80075	0.776	0.112	3.80414e-239
MYL12B	9.42065e-243	1.74109	0.811	0.123	1.95234e-238
HINT1	2.04847e-242	1.70144	0.97	0.295	4.24525e-238
LAMTOR1	4.03589e-242	1.74132	0.622	0.036	8.36398e-238
LSM2	3.6593e-241	1.76375	0.592	0.028	7.58353e-237
RPL10A	4.73458e-241	1.61557	0.981	0.332	9.81195e-237
RPL22	2.1247e-240	1.77015	0.987	0.251	4.40322e-236
TBCA	3.21548e-240	1.76247	0.776	0.112	6.66376e-236
RPL17	4.59151e-240	1.41166	0.997	0.436	9.51544e-236
IGLL1	1.33205e-239	1.99431	0.561	0.014	2.76054e-235
DDX5	3.60341e-239	-1.21587	0.964	0.967	7.46771e-235
CREG1	1.89945e-238	1.74368	0.623	0.038	3.93643e-234
NDUFB11	2.7197e-238	1.73065	0.825	0.137	5.63631e-234
DDT	6.79076e-238	1.77721	0.755	0.102	1.40732e-233
C1QBP	2.7952e-237	1.80394	0.687	0.07	5.79278e-233
RPS15A	2.80903e-237	1.61757	0.997	0.335	5.82143e-233
RPL6	3.56168e-237	1.66224	0.98	0.307	7.38124e-233
AIF1	5.41667e-236	1.75503	0.958	0.206	1.12255e-231
JAG1	1.44152e-235	1.76296	0.573	0.019	2.98741e-231
ATP5MG	6.55106e-233	1.72623	0.944	0.201	1.35764e-228
FTL	1.60322e-232	1.63438	0.999	0.328	3.32251e-228
RPL26	1.97777e-232	1.63492	1	0.346	4.09873e-228
ANKRD28	4.08032e-232	-1.11113	0.967	0.966	8.45606e-228
NDUFB9	5.64922e-232	1.69033	0.831	0.14	1.17074e-227
RTN3	1.07575e-230	1.69147	0.674	0.063	2.22938e-226
RETN	1.3029e-230	2.08709	0.492	0	2.70014e-226
SMIM26	1.70367e-229	1.66106	0.732	0.093	3.53068e-225
ARPC3	7.62116e-228	1.72824	0.88	0.173	1.57941e-223
NDUFC2	3.14581e-227	1.70346	0.72	0.091	6.51938e-223
DAD1	3.78557e-227	1.73346	0.609	0.045	7.84522e-223
TOMM6	3.76486e-226	1.71488	0.762	0.116	7.80229e-222
RPS12	4.08252e-225	1.61955	0.999	0.341	8.46062e-221
SLC25A5	4.55388e-225	1.77013	0.797	0.143	9.43745e-221
SSR4	7.06003e-224	1.65438	0.924	0.221	1.46312e-219
EIF3F	5.68866e-223	1.68119	0.823	0.154	1.17892e-218
JUND	1.25226e-222	-0.880997	0.999	0.982	2.59517e-218
RPS13	2.43319e-222	1.4601	0.999	0.396	5.04254e-218
UQCRB	1.1856e-221	1.67534	0.955	0.245	2.45703e-217
TOMM7	3.66593e-221	1.6283	0.932	0.203	7.59726e-217
TMEM59	4.41817e-221	1.63541	0.749	0.107	9.15621e-217
RPS3A	2.75147e-220	1.383	1	0.45	5.70215e-216
RANBP1	3.28885e-220	1.72767	0.639	0.061	6.81582e-216
RFLNB	3.53833e-220	1.6667	0.766	0.112	7.33284e-216
RPL30	7.13474e-220	1.57145	0.999	0.333	1.4786e-215
ST13	4.20036e-219	1.62905	0.737	0.109	8.70482e-215
SF3B5	4.44591e-219	1.64817	0.785	0.126	9.2137e-215
PTGER4	4.90431e-219	-2.44209	0.499	0.888	1.01637e-214
RBM39	4.96628e-219	-1.33511	0.913	0.943	1.02921e-214
MLF1	2.12712e-218	1.63275	0.74	0.102	4.40824e-214
RPL7	2.53615e-218	1.48807	0.994	0.373	5.25592e-214
SNX3	3.69629e-218	1.66945	0.701	0.087	7.66018e-214
OST4	1.96615e-216	1.65926	0.781	0.123	4.07465e-212
GNA15	6.74361e-216	1.63215	0.576	0.034	1.39755e-211
ATP5F1C	4.62851e-215	1.65356	0.683	0.084	9.59213e-211
MYDGF	2.6899e-214	1.67011	0.69	0.09	5.57454e-210
SNHG8	3.46771e-214	1.62355	0.856	0.178	7.18648e-210
EIF3H	8.05833e-214	1.61216	0.854	0.175	1.67001e-209
SNHG6	5.35026e-213	1.65328	0.885	0.183	1.10879e-208
RSL24D1	7.48774e-213	1.62855	0.848	0.173	1.55176e-208
SNRPD1	9.40959e-213	1.59867	0.687	0.082	1.95004e-208
TMEM258	1.23175e-212	1.61457	0.792	0.136	2.55269e-208
RPS20	3.73695e-212	1.60391	0.968	0.264	7.74445e-208
RPS27A	3.9085e-212	1.45514	0.999	0.394	8.09999e-208
UQCR11	8.226e-212	1.61182	0.84	0.152	1.70476e-207
CAT	9.01669e-212	1.66676	0.915	0.229	1.86862e-207
EEF1G	2.16479e-210	1.56827	0.97	0.309	4.48631e-206
SNRPE	3.585e-210	1.60218	0.642	0.069	7.42956e-206
RPSA	2.62251e-209	1.46785	0.974	0.357	5.43489e-205
TSPO	4.01313e-209	1.62693	0.945	0.22	8.31681e-205
PYURF	4.05088e-209	1.52769	0.495	0.014	8.39504e-205
NFKBIA	4.14444e-209	-1.86511	0.786	0.911	8.58893e-205
RPS10	7.25526e-209	1.63014	0.939	0.205	1.50358e-204
SEC11A	8.73993e-209	1.61709	0.713	0.104	1.81126e-204
ABRACL	2.20017e-208	1.59885	0.564	0.04	4.55963e-204
ARHGDIB	3.1219e-208	1.54503	0.913	0.206	6.46983e-204
MRPL51	6.25757e-208	1.59646	0.579	0.043	1.29682e-203
NENF	8.81995e-208	1.56442	0.649	0.072	1.82785e-203
MZT2A	1.37544e-207	1.66226	0.592	0.053	2.85047e-203
UQCR10	1.04784e-206	1.60511	0.661	0.079	2.17155e-202
CSTA	2.30426e-206	1.62054	0.903	0.191	4.77534e-202
NOP10	7.07956e-205	1.56011	0.665	0.081	1.46717e-200
BEX3	2.15427e-204	1.5049	0.475	0.009	4.46452e-200
ATP6V1G1	3.93781e-204	1.52173	0.772	0.131	8.16072e-200
MPG	9.75735e-204	1.53962	0.602	0.057	2.02211e-199
RPL9	5.18712e-203	1.44621	0.997	0.382	1.07498e-198
ATP5MD	1.33152e-202	1.55517	0.758	0.124	2.75945e-198
TENT5C	1.82966e-202	1.55048	0.551	0.034	3.79179e-198
PTRHD1	4.6778e-202	1.56762	0.61	0.062	9.69428e-198
GDI2	6.05992e-202	1.53741	0.756	0.123	1.25586e-197
RPL35A	3.43607e-201	1.34296	0.997	0.424	7.12092e-197
NDUFB5	1.80649e-200	1.54443	0.596	0.057	3.74377e-196
RPL27	2.74774e-200	1.5568	0.988	0.282	5.69442e-196
NSA2	6.59522e-200	1.5074	0.759	0.129	1.36679e-195
RPS4X	8.25219e-200	1.3317	0.999	0.443	1.71018e-195
GTF3A	2.13801e-199	1.56491	0.71	0.11	4.43082e-195
FOS	3.35534e-199	-1.50727	0.863	0.915	6.9536e-195
SNRPF	8.76846e-199	1.5873	0.734	0.122	1.81718e-194
RPS17	9.55183e-199	1.57371	0.986	0.26	1.97952e-194
RPL18	1.08914e-198	1.50379	1	0.333	2.25714e-194
HSD17B11	1.79952e-198	1.52452	0.576	0.047	3.72933e-194
ATP5MC2	1.40745e-194	1.53808	0.97	0.285	2.9168e-190
CCDC85B	3.45697e-194	1.58782	0.709	0.108	7.16422e-190
LSM5	4.63872e-194	1.5118	0.595	0.062	9.61328e-190
SH3BGRL	5.42738e-194	1.52803	0.69	0.104	1.12477e-189
ADGRG3	6.52195e-194	1.57166	0.421	0	1.35161e-189
CAMLG	6.66003e-194	1.47507	0.602	0.059	1.38022e-189
UQCRFS1	1.04536e-193	1.44289	0.753	0.124	2.1664e-189
CCT4	2.73933e-193	1.46209	0.791	0.146	5.67698e-189
RPS6	5.74334e-193	1.35589	0.997	0.411	1.19025e-188
TMEM14C	8.43875e-193	1.45264	0.521	0.033	1.74885e-188
POLR1D	8.54704e-193	1.52471	0.851	0.189	1.77129e-188
MPC2	4.0226e-192	1.5099	0.68	0.099	8.33645e-188
RPL36AL	4.56259e-192	1.52056	0.931	0.246	9.45551e-188
NDUFB2	1.5154e-191	1.47637	0.67	0.098	3.14053e-187
SUMO1	1.61495e-191	1.45617	0.657	0.085	3.34682e-187
SAT1	6.3395e-191	-1.21451	0.957	0.944	1.3138e-186
HMGN2	1.07308e-190	1.45186	0.925	0.228	2.22384e-186
PSMA2	2.81223e-189	1.49131	0.672	0.099	5.82808e-185
TMEM219	4.19105e-189	1.46254	0.616	0.07	8.68552e-185
FAU	1.01925e-187	1.36602	0.996	0.368	2.11229e-183
EPB41L4A-AS1	1.17724e-187	1.43398	0.595	0.064	2.43971e-183
RPS25	2.06108e-187	1.40623	0.988	0.35	4.27137e-183
SPINK2	2.11302e-187	1.59991	0.7	0.108	4.37902e-183
TIMM13	8.44538e-187	1.43009	0.73	0.123	1.75022e-182
ATP5MF	8.7825e-187	1.49327	0.724	0.124	1.82009e-182
FAM162A	1.1483e-185	1.46463	0.574	0.058	2.37974e-181
TOMM22	1.9435e-185	1.47545	0.61	0.076	4.02771e-181
IGFBP2	3.89821e-185	1.47362	0.404	0	8.07865e-181
RPS14	5.06783e-185	1.36729	0.996	0.402	1.05026e-180
COX6C	1.99034e-184	1.49619	0.766	0.145	4.12478e-180
RPL19	2.31826e-184	1.28874	0.986	0.394	4.80436e-180
COX5B	3.22373e-184	1.4496	0.811	0.166	6.68087e-180
CLTA	3.81167e-184	1.43394	0.608	0.07	7.89931e-180
RPS7	3.85318e-184	1.22787	0.991	0.442	7.98534e-180
RPS23	5.80342e-184	1.29326	1	0.428	1.2027e-179
TXNIP	7.00486e-184	1.51572	0.775	0.146	1.45169e-179
SRSF9	8.03849e-184	1.4297	0.76	0.145	1.6659e-179
SIVA1	1.02889e-183	1.48532	0.595	0.068	2.13228e-179
ERP29	1.65476e-183	1.43909	0.808	0.177	3.42932e-179
UQCRQ	4.93733e-183	1.4647	0.704	0.114	1.02321e-178
PARK7	6.61965e-183	1.50589	0.662	0.106	1.37186e-178
RBIS	9.50179e-183	1.435	0.694	0.113	1.96915e-178
BCAP31	1.43346e-182	1.45526	0.657	0.098	2.9707e-178
PPP1R14B	1.82922e-182	1.50184	0.639	0.09	3.79087e-178
RPL39	1.9445e-182	1.27671	1	0.406	4.02979e-178
RPLP0	2.94591e-182	1.37196	0.973	0.366	6.1051e-178
JTB	3.71518e-182	1.40823	0.674	0.101	7.69934e-178
NDUFB8	5.11516e-182	1.48933	0.625	0.086	1.06007e-177
CFD	5.83205e-182	1.2572	0.991	0.471	1.20863e-177
RPL28	2.10474e-181	-0.672304	1	0.972	4.36186e-177
SNHG7	3.36235e-181	1.46493	0.672	0.104	6.96813e-177
PPA1	1.15099e-180	1.49641	0.696	0.117	2.38531e-176
RPL7A	1.49078e-180	1.27095	0.99	0.421	3.08949e-176
VAMP8	1.77853e-180	1.46583	0.905	0.233	3.68583e-176
GMFG	3.31589e-180	1.43714	0.859	0.192	6.87186e-176
PEBP1	1.72538e-179	1.40228	0.707	0.115	3.57567e-175
SAP30	2.18542e-179	1.50089	0.53	0.045	4.52907e-175
RPL4	1.01649e-178	1.49755	0.939	0.275	2.10658e-174
RPL3	1.36722e-178	1.25162	0.991	0.438	2.83343e-174
ESD	1.8067e-178	1.39508	0.564	0.057	3.74421e-174
SMS	2.93566e-178	1.40643	0.535	0.047	6.08386e-174
PTMA	4.13266e-178	-0.815034	0.997	0.958	8.56452e-174
NEDD8	7.55753e-178	1.42875	0.714	0.129	1.56622e-173
AC020916.1	4.55711e-177	-1.45123	0.889	0.929	9.44416e-173
MED30	7.30129e-177	1.39725	0.554	0.053	1.51312e-172
TUBA1B	1.04581e-176	1.4457	0.854	0.203	2.16734e-172
TMEM123	1.31817e-176	1.38003	0.618	0.078	2.73179e-172
POMP	1.90931e-176	1.40981	0.648	0.1	3.95685e-172
GAS5	7.40656e-176	1.38109	0.964	0.34	1.53494e-171
RPL34	8.1054e-176	1.26795	0.999	0.412	1.67976e-171
CD44	9.16918e-176	-1.52504	0.808	0.884	1.90022e-171
THOC7	1.79334e-175	1.39779	0.556	0.06	3.71652e-171
CTSW	2.34074e-175	1.45079	0.485	0.032	4.85095e-171
KLF6	2.76141e-175	-1.12525	0.944	0.917	5.72275e-171
RPL22L1	4.15021e-175	1.42405	0.846	0.204	8.60089e-171
COX6A1	5.27199e-175	1.36985	0.756	0.151	1.09257e-170
NDUFS4	8.98115e-175	1.39178	0.483	0.032	1.86125e-170
ATP5PB	2.00167e-174	1.38602	0.632	0.091	4.14825e-170
DDX3X	2.79646e-174	-1.45753	0.867	0.901	5.79539e-170
RPL36A	3.9231e-174	1.35419	0.986	0.329	8.13023e-170
LSM3	8.36628e-174	1.4495	0.547	0.058	1.73383e-169
PGLS	1.15464e-173	1.42045	0.745	0.153	2.39287e-169
MRPS36	1.19127e-173	1.36957	0.472	0.028	2.46879e-169
MT-ATP8	1.34859e-173	-2.44674	0.398	0.824	2.79482e-169
RPL24	3.25299e-173	1.23301	0.994	0.424	6.74149e-169
PPIB	3.33418e-173	1.44255	0.771	0.166	6.90975e-169
COX8A	6.16517e-173	1.38769	0.834	0.183	1.27767e-168
PSMB3	1.23905e-172	1.42166	0.655	0.107	2.5678e-168
NME4	1.3032e-172	1.36658	0.518	0.042	2.70076e-168
HNRNPH1	2.69184e-172	-1.18037	0.919	0.888	5.57856e-168
DDOST	1.76616e-171	1.45427	0.57	0.071	3.66018e-167
STK17A	2.36665e-171	1.39801	0.427	0.013	4.90465e-167
NME1	2.82754e-171	1.43732	0.525	0.052	5.8598e-167
UFC1	5.46019e-171	1.40685	0.69	0.125	1.13157e-166
SNRPD2	9.31316e-171	1.37139	0.812	0.189	1.93006e-166
ZFP36	1.37644e-170	-1.94488	0.573	0.841	2.85254e-166
MRPS33	2.02244e-170	1.36527	0.502	0.041	4.19131e-166
VAT1	4.8711e-170	1.32836	0.44	0.017	1.00949e-165
CHCHD2	6.95269e-170	1.40075	0.932	0.275	1.44088e-165
LAMTOR4	1.10676e-169	1.33069	0.853	0.205	2.29365e-165
H3F3B	3.91731e-169	-0.701923	0.999	0.966	8.11823e-165
COMT	4.30302e-169	1.40305	0.606	0.086	8.91757e-165
EIF3I	6.05875e-169	1.32222	0.698	0.126	1.25562e-164
EGFL7	2.91586e-168	1.41148	0.391	0.005	6.04283e-164
CERS6	2.88986e-167	1.33888	0.566	0.062	5.98894e-163
GABARAP	4.19819e-167	1.31679	0.909	0.238	8.70034e-163
COX7B	7.31638e-167	1.3695	0.89	0.232	1.51625e-162
SRP14	1.09834e-166	1.39213	0.905	0.24	2.2762e-162
HCST	2.77185e-166	1.41521	0.846	0.19	5.74439e-162
WDR74	4.04392e-166	-2.73759	0.221	0.761	8.38062e-162
KRTCAP2	4.29266e-166	1.29651	0.714	0.135	8.8961e-162
MDH2	9.47154e-166	1.32388	0.586	0.08	1.96288e-161
C19orf53	7.56796e-165	1.34395	0.654	0.111	1.56838e-160
CRNDE	1.47526e-164	1.33226	0.469	0.029	3.05733e-160
RPS26	6.7239e-164	1.26548	0.996	0.381	1.39346e-159
CNIH1	8.38628e-164	1.29164	0.582	0.073	1.73797e-159
HDGF	1.10778e-163	1.34852	0.664	0.114	2.29576e-159
SSR3	4.40719e-163	1.25449	0.557	0.064	9.13345e-159
ANAPC16	4.81711e-163	1.37853	0.597	0.09	9.98298e-159
TMEM256	8.88695e-163	1.44562	0.547	0.068	1.84173e-158
PSMB7	1.32941e-162	1.36934	0.56	0.07	2.75507e-158
PAIP2	1.47724e-162	1.27627	0.711	0.13	3.06144e-158
EVA1B	9.52543e-162	1.35629	0.527	0.054	1.97405e-157
HIGD2A	2.00142e-161	1.34801	0.724	0.146	4.14775e-157
RPL15	3.83884e-160	1.07027	0.997	0.502	7.95561e-156
HOMER3	5.15066e-160	1.18621	0.74	0.14	1.06742e-155
CANX	6.04673e-160	1.26028	0.75	0.16	1.25312e-155
PTGES3	1.12211e-159	1.25213	0.73	0.145	2.32547e-155
GPI	1.21875e-159	1.3677	0.638	0.101	2.52574e-155
ATP5ME	9.36524e-159	1.28203	0.876	0.212	1.94085e-154
GADD45GIP1	5.74212e-158	1.25728	0.62	0.095	1.19e-153
MIF	7.29549e-158	1.3348	0.949	0.313	1.51192e-153
RPS3	9.31656e-158	1.13278	0.999	0.491	1.93076e-153
RPS16	1.30695e-157	1.26639	0.98	0.376	2.70853e-153
CLNS1A	2.23781e-157	1.2719	0.521	0.057	4.63763e-153
NDUFA11	2.47769e-157	1.28281	0.781	0.184	5.13476e-153
PHB2	2.65707e-157	1.25989	0.665	0.121	5.50651e-153
LSM7	4.95546e-157	1.26299	0.804	0.193	1.02697e-152
EIF3M	5.65743e-157	1.2809	0.771	0.18	1.17245e-152
HMGN3	6.9359e-157	1.23907	0.684	0.126	1.4374e-152
NHP2	9.64673e-157	1.35182	0.515	0.059	1.99919e-152
SLC38A2	1.00521e-156	-1.59454	0.758	0.85	2.0832e-152
TMEM14B	1.07416e-156	1.27472	0.447	0.032	2.2261e-152
RYBP	1.27015e-156	1.25491	0.553	0.064	2.63227e-152
TRIR	1.51156e-156	1.29992	0.773	0.176	3.13255e-152
ISCA1	3.28805e-156	1.26155	0.436	0.026	6.81416e-152
C9orf16	4.08224e-156	1.25209	0.801	0.191	8.46004e-152
RABAC1	4.38307e-156	1.35882	0.55	0.073	9.08348e-152
NOP53	3.59766e-155	1.31306	0.86	0.239	7.45579e-151
SCCPDH	5.70672e-155	1.26947	0.41	0.019	1.18266e-150
GSTO1	1.60221e-154	1.26612	0.625	0.102	3.32043e-150
KLF4	1.91123e-154	-2.56444	0.267	0.746	3.96083e-150
ATP5PD	2.56674e-154	1.31503	0.509	0.059	5.31932e-150
SNU13	2.73509e-154	1.24167	0.691	0.132	5.6682e-150
SYNGR1	3.76098e-154	1.34636	0.592	0.094	7.79426e-150
TMBIM6	6.67895e-154	1.26222	0.759	0.173	1.38415e-149
NTNG2	2.52295e-153	1.24905	0.392	0.013	5.22855e-149
PSMA7	8.09398e-153	1.2204	0.765	0.173	1.6774e-148
CHURC1	9.02551e-153	1.30903	0.573	0.085	1.87045e-148
RPS21	5.37117e-152	1.19746	0.986	0.36	1.11312e-147
EMID1	1.99675e-151	1.15046	0.371	0.009	4.13807e-147
ATP5MC1	3.18291e-151	1.36383	0.597	0.1	6.59625e-147
RGL4	7.76869e-151	1.38204	0.335	0	1.60998e-146
YBX1	1.49566e-150	1.31193	0.915	0.289	3.0996e-146
DYNLL1	3.30962e-150	1.27429	0.668	0.127	6.85886e-146
LEPROTL1	6.6873e-150	1.21789	0.512	0.059	1.38588e-145
RPS19	7.81712e-150	1.13044	0.999	0.476	1.62002e-145
TOMM20	7.82768e-150	1.23351	0.847	0.227	1.62221e-145
ANAPC11	1.02863e-149	1.38894	0.511	0.064	2.13173e-145
COX6B1	1.07726e-149	1.27069	0.867	0.229	2.23252e-145
C11orf1	1.38038e-149	1.18535	0.369	0.01	2.86069e-145
CUTA	2.31649e-149	1.24374	0.694	0.142	4.8007e-145
TAF9	4.21922e-149	1.11916	0.654	0.107	8.74392e-145
CHD2	5.14454e-149	-1.81716	0.574	0.822	1.06615e-144
SLC39A3	5.20902e-149	1.26127	0.401	0.021	1.07952e-144
NKG7	7.92417e-149	1.62689	0.561	0.091	1.6422e-144
SEC61G	1.14467e-148	1.22831	0.723	0.155	2.3722e-144
CCT8	2.36027e-148	1.16376	0.644	0.113	4.89143e-144
RPS28	2.36279e-148	1.20847	0.999	0.386	4.89665e-144
RPL32	3.17416e-148	1.0643	0.999	0.503	6.57812e-144
PRR13	4.89139e-148	1.23069	0.691	0.143	1.01369e-143
PFDN4	5.59009e-148	1.26285	0.462	0.044	1.15849e-143
RPLP2	8.96272e-148	1.2047	0.999	0.368	1.85744e-143
TRGC2	1.49073e-147	1.32081	0.358	0.008	3.08939e-143
ATRAID	2.03107e-147	1.26979	0.479	0.049	4.20919e-143
PSMB1	5.92205e-147	1.17691	0.701	0.149	1.22729e-142
SERP1	6.56378e-147	1.24337	0.84	0.218	1.36028e-142
APEX1	7.10814e-147	1.2466	0.688	0.139	1.47309e-142
NBDY	1.11413e-146	1.21512	0.418	0.028	2.30893e-142
ATP5F1E	1.17586e-146	1.26894	0.975	0.265	2.43686e-142
IGBP1	1.92784e-146	1.26918	0.455	0.042	3.99525e-142
UBE2S	2.9911e-146	1.18166	0.709	0.145	6.19875e-142
TNFAIP2	4.57377e-146	-2.87145	0.162	0.693	9.47868e-142
UBE2L3	4.75502e-146	1.18374	0.632	0.112	9.85431e-142
ERH	6.56331e-146	1.25844	0.499	0.06	1.36018e-141
PRSS21	9.7608e-146	1.1619	0.57	0.079	2.02283e-141
SSR2	1.06868e-145	1.19393	0.716	0.156	2.21473e-141
RAB27A	3.59484e-145	1.25762	0.466	0.043	7.44995e-141
AP3S1	4.03131e-145	1.26043	0.482	0.05	8.3545e-141
EEF1E1	4.34655e-145	1.2324	0.446	0.038	9.00779e-141
TSTD1	8.86533e-145	1.22649	0.384	0.018	1.83725e-140
ANPEP	7.52967e-144	1.20458	0.32	0	1.56045e-139
NDUFB10	1.3801e-143	1.24012	0.633	0.122	2.86013e-139
LYL1	1.41903e-143	1.16876	0.531	0.068	2.9408e-139
BRK1	2.83024e-143	1.24478	0.593	0.103	5.86539e-139
KDELR1	2.9354e-143	1.20525	0.527	0.07	6.08333e-139
PHPT1	3.75023e-143	1.18977	0.789	0.201	7.77199e-139
PYCARD	6.26179e-143	1.28154	0.652	0.13	1.29769e-138
ITM2B	6.85114e-143	1.18421	0.739	0.171	1.41983e-138
CD302	1.15355e-142	1.28461	0.553	0.086	2.39062e-138
RUNX1	3.02377e-142	1.16235	0.662	0.123	6.26646e-138
TMEM147	3.16905e-142	1.21333	0.462	0.047	6.56753e-138
RBM3	6.45491e-141	1.19377	0.814	0.22	1.33772e-136
STMP1	1.87073e-140	1.16718	0.665	0.137	3.87689e-136
TMEM230	2.71808e-140	1.15654	0.479	0.055	5.63295e-136
SNRPB	5.18096e-140	1.22091	0.729	0.173	1.0737e-135
MYL12A	5.44625e-140	1.25012	0.668	0.14	1.12868e-135
UBL5	6.28808e-140	1.22054	0.747	0.175	1.30314e-135
RPLP1	1.48464e-139	0.932212	1	0.531	3.07676e-135
SSBP1	1.70284e-139	1.0955	0.648	0.12	3.52896e-135
NDUFB1	2.9666e-139	1.23235	0.603	0.109	6.14798e-135
CD74	4.37921e-139	-2.19724	0.472	0.756	9.07548e-135
ACTG1	1.00506e-138	1.17319	0.986	0.392	2.08288e-134
DNPH1	2.25192e-138	1.22275	0.411	0.033	4.66687e-134
TRAPPC6A	2.92279e-138	1.21381	0.574	0.097	6.05719e-134
SYPL1	3.21061e-138	1.13715	0.609	0.107	6.65366e-134
PFDN2	4.90625e-138	1.15705	0.71	0.159	1.01677e-133
RPL10	9.07815e-138	0.983122	0.997	0.539	1.88136e-133
IRF2BP2	9.27132e-138	-0.996065	0.947	0.893	1.92139e-133
JMJD1C	1.20812e-137	-1.33166	0.834	0.869	2.5037e-133
SAMHD1	4.16432e-137	-2.86553	0.014	0.584	8.63014e-133
TATDN1	5.98503e-137	1.13894	0.407	0.03	1.24034e-132
BRI3	9.19488e-137	1.17179	0.759	0.191	1.90555e-132
OLA1	1.07286e-136	1.19399	0.45	0.047	2.22339e-132
MRPS21	1.10608e-136	1.19522	0.541	0.086	2.29225e-132
GADD45A	1.41639e-136	1.20669	0.466	0.048	2.93532e-132
DNAJC1	2.38318e-136	1.12879	0.649	0.128	4.9389e-132
ANP32B	2.5597e-136	1.15272	0.782	0.201	5.30472e-132
MLC1	3.15957e-136	1.07457	0.304	0	6.5479e-132
PYGL	4.22464e-136	1.17454	0.623	0.114	8.75514e-132
GNB4	5.5236e-136	1.1075	0.407	0.027	1.14471e-131
PSMG2	5.79017e-136	1.13016	0.544	0.083	1.19995e-131
GLRX5	1.1791e-135	1.13275	0.469	0.053	2.44356e-131
PITHD1	1.70277e-135	1.14714	0.479	0.056	3.52882e-131
PPP1R15B	2.9745e-135	-2.09427	0.437	0.765	6.16435e-131
TPRKB	3.16792e-135	1.12244	0.356	0.015	6.5652e-131
RPL5	8.75042e-135	1.05454	0.975	0.466	1.81344e-130
ATP5MPL	1.45468e-134	1.14608	0.823	0.211	3.01469e-130
LY6E	3.26654e-134	1.24725	0.416	0.036	6.76958e-130
TXNDC12	3.50004e-134	1.13932	0.385	0.025	7.25349e-130
RPS24	4.29852e-134	1.00556	0.999	0.519	8.90825e-130
TMED3	5.7003e-134	1.2016	0.433	0.043	1.18133e-129
RAC1	6.64446e-134	1.10478	0.762	0.194	1.377e-129
PROK2	1.02936e-133	1.21815	0.615	0.11	2.13325e-129
IRF1	1.06205e-133	-1.94694	0.486	0.777	2.20099e-129
CCT7	1.24091e-133	1.15577	0.443	0.048	2.57166e-129
PFDN5	1.28876e-133	1.19565	0.978	0.367	2.67082e-129
SNRPC	1.40854e-132	1.18353	0.499	0.07	2.91906e-128
RPL21	1.55663e-132	0.998185	0.994	0.504	3.22596e-128
LMNA	2.13717e-132	-2.24016	0.368	0.738	4.42907e-128
COPS9	3.62692e-132	1.19713	0.512	0.078	7.51643e-128
MS4A4E	3.85369e-132	-2.99807	0.007	0.565	7.98639e-128
ATP6V1F	9.23781e-132	1.12102	0.683	0.153	1.91444e-127
CD81	1.03232e-131	1.19447	0.476	0.061	2.13937e-127
NDUFAB1	1.12253e-131	1.18411	0.414	0.038	2.32633e-127
TMA7	1.8165e-131	1.1687	0.919	0.267	3.76451e-127
CDCA7L	2.07429e-131	1.1382	0.294	0	4.29876e-127
N4BP2L1	2.64614e-131	1.12777	0.567	0.093	5.48386e-127
NCF1	2.68857e-131	-2.63806	0.079	0.628	5.5718e-127
ATP5MC3	3.27467e-131	1.15798	0.83	0.241	6.78642e-127
MTHFD2L	5.63752e-131	1.10118	0.404	0.032	1.16832e-126
SLPI	1.00675e-130	1.37169	0.293	0	2.08639e-126
HNRNPF	1.04243e-130	1.10488	0.504	0.07	2.16034e-126
CTNNAL1	1.54978e-130	1.10181	0.391	0.027	3.21176e-126
TUBB	3.0064e-130	1.1722	0.597	0.114	6.23047e-126
FBL	1.70529e-129	1.13868	0.608	0.123	3.53405e-125
ZNF593	5.05436e-129	1.17956	0.544	0.092	1.04747e-124
SLC25A6	5.24101e-129	1.22206	0.831	0.245	1.08615e-124
ACP1	7.23628e-129	1.05693	0.46	0.055	1.49965e-124
MGST2	7.59679e-129	1.17852	0.431	0.049	1.57436e-124
SELENOP	1.14261e-128	1.0161	0.289	0	2.36794e-124
RPL37	3.82791e-128	0.899893	1	0.506	7.93297e-124
PHB	6.60823e-128	1.1709	0.424	0.045	1.36949e-123
SRSF11	1.29702e-127	-1.37674	0.781	0.841	2.68795e-123
SNHG16	1.33663e-127	1.0058	0.557	0.094	2.77003e-123
RAP1B	1.38499e-127	1.05406	0.658	0.135	2.87025e-123
MRPL47	1.4229e-127	1.0997	0.427	0.045	2.94883e-123
EDF1	2.1382e-127	1.10632	0.885	0.279	4.4312e-123
SRM	2.33409e-127	1.18661	0.463	0.061	4.83717e-123
RPL11	4.12566e-127	0.960984	0.999	0.514	8.55002e-123
DNAJC3	4.95924e-127	1.08161	0.58	0.106	1.02775e-122
RAN	1.27271e-126	1.0811	0.797	0.22	2.63756e-122
PRDX1	2.48398e-126	1.17798	0.491	0.072	5.14781e-122
ELOB	2.64002e-126	1.10326	0.905	0.283	5.47119e-122
C4orf3	3.30649e-126	1.23995	0.443	0.056	6.85237e-122
RNF7	7.56232e-126	1.07638	0.558	0.1	1.56722e-121
PSMA5	1.04988e-125	1.09897	0.459	0.058	2.17577e-121
FIS1	1.50404e-125	1.11829	0.532	0.091	3.11697e-121
ATP2C1	3.14671e-125	1.01577	0.58	0.1	6.52125e-121
CHID1	4.68952e-125	1.14102	0.395	0.035	9.71856e-121
LDHA	9.72774e-125	1.06815	0.716	0.174	2.01598e-120
CYTOR	2.00613e-124	1.08603	0.519	0.08	4.15751e-120
RAB5C	5.69945e-124	1.11562	0.429	0.047	1.18115e-119
CD96	6.89564e-124	1.01861	0.299	0.005	1.42905e-119
CNBP	1.78295e-123	1.06163	0.576	0.11	3.69498e-119
BTF3L4	1.85726e-123	1.04397	0.453	0.057	3.84899e-119
UBE2G1	2.19848e-123	1.10722	0.42	0.045	4.55612e-119
VDAC2	7.06731e-123	1.04629	0.709	0.173	1.46463e-118
PDCD2	1.41346e-122	1.01968	0.405	0.04	2.92926e-118
DCTN3	1.58405e-122	1.1103	0.483	0.073	3.28279e-118
FXR1	1.67845e-122	1.00935	0.797	0.213	3.47843e-118
CSNK2B	2.07427e-122	1.14804	0.567	0.112	4.29871e-118
ATP6V0E1	2.67471e-122	1.17069	0.391	0.037	5.54306e-118
TRAPPC2L	2.98254e-122	1.06288	0.433	0.051	6.18102e-118
PABPC1	5.93923e-122	-0.632933	0.987	0.928	1.23085e-117
SELL	6.04168e-122	1.10134	0.348	0.021	1.25208e-117
CIRBP	7.95006e-122	1.0353	0.825	0.241	1.64757e-117
CD37	1.96839e-121	1.14191	0.701	0.177	4.07929e-117
URI1	2.00977e-121	1.08376	0.427	0.048	4.16504e-117
SEM1	2.84041e-121	1.09937	0.597	0.123	5.88647e-117
SUMO3	3.61015e-121	1.10288	0.548	0.101	7.48168e-117
FTH1	4.13921e-121	-0.73644	0.983	0.905	8.57811e-117
LDLR	8.02579e-121	-2.82716	0.025	0.546	1.66327e-116
TMEM126A	1.17179e-120	1.03325	0.377	0.032	2.42841e-116
ECHS1	1.37741e-120	1.05091	0.437	0.055	2.85455e-116
SEC61B	1.92263e-120	1.06155	0.85	0.259	3.98446e-116
XRCC6	1.99131e-120	1.05147	0.602	0.128	4.1268e-116
ABHD14B	2.3361e-120	1.00078	0.563	0.103	4.84133e-116
TXNL4A	2.33989e-120	1.10135	0.41	0.044	4.84919e-116
KDELR2	2.58894e-120	1.04653	0.416	0.044	5.36533e-116
MLF2	3.98026e-120	1.03877	0.62	0.135	8.2487e-116
LAPTM4A	7.75613e-120	1.0637	0.579	0.118	1.60738e-115
CLC	8.09071e-120	1.57601	0.27	0	1.67672e-115
SMIM3	9.14493e-120	1.03899	0.641	0.14	1.89519e-115
EIF2S3	1.0665e-119	1.06998	0.779	0.222	2.21021e-115
SELENOH	1.26675e-119	1.02585	0.71	0.177	2.62521e-115
PSME1	2.42271e-119	1.1159	0.592	0.128	5.02082e-115
ZCRB1	2.57936e-119	1.02909	0.398	0.039	5.34546e-115
HMGA1	9.36376e-119	1.04503	0.763	0.203	1.94055e-114
MAGOH	1.26207e-118	1.08023	0.447	0.061	2.61551e-114
SNRPB2	2.42991e-118	1.08092	0.519	0.093	5.03575e-114
IL18	2.62794e-118	0.980774	0.449	0.056	5.44614e-114
AURKAIP1	4.54669e-118	1.15362	0.496	0.084	9.42257e-114
RNASET2	7.30584e-118	1.06027	0.756	0.213	1.51406e-113
AGTRAP	8.99416e-118	1.06451	0.514	0.087	1.86395e-113
BUD31	1.14578e-117	1.03569	0.613	0.134	2.37452e-113
ERGIC3	1.57168e-117	1.04657	0.531	0.096	3.25714e-113
MRPL11	2.00402e-117	1.08327	0.391	0.041	4.15314e-113
MNDA	8.79395e-117	1.04742	0.596	0.122	1.82246e-112
PTAFR	1.17589e-116	-2.68031	0.023	0.535	2.4369e-112
ITGAE	1.79655e-116	1.09736	0.424	0.053	3.72316e-112
TMED2	1.99959e-116	1.03804	0.427	0.053	4.14395e-112
HSH2D	3.04474e-116	-1.84811	0.535	0.767	6.30991e-112
PRPF38A	3.50265e-116	1.00017	0.499	0.08	7.25888e-112
PSMA1	6.63667e-116	0.945039	0.732	0.191	1.37538e-111
CDC42EP3	8.65917e-116	-2.03777	0.336	0.704	1.79453e-111
PUF60	2.42963e-115	0.97415	0.525	0.093	5.03517e-111
CCNG1	2.47869e-115	1.03394	0.391	0.041	5.13684e-111
ZG16B	4.33294e-115	1.03285	0.26	0	8.97958e-111
BANF1	5.77665e-115	1.1603	0.436	0.062	1.19715e-110
TRMT112	7.49667e-115	1.10367	0.521	0.099	1.55361e-110
ILF2	9.31191e-115	0.983898	0.71	0.183	1.9298e-110
ELOC	1.8286e-114	1.02368	0.605	0.132	3.7896e-110
PRELID1	4.05735e-114	1.05214	0.646	0.158	8.40846e-110
AL355922.1	4.71139e-114	1.27244	0.361	0.033	9.76389e-110
VDAC1	5.40813e-114	1.02923	0.372	0.036	1.12078e-109
PPIA	7.03039e-114	1.11479	0.934	0.325	1.45698e-109
PSMB6	7.5198e-114	1.03553	0.436	0.06	1.5584e-109
HLA-B	8.9345e-114	-0.840662	0.937	0.864	1.85159e-109
PPT1	1.28726e-113	1.0551	0.41	0.05	2.66771e-109
OCIAD2	3.52413e-113	0.979151	0.336	0.023	7.3034e-109
RPS29	6.93654e-113	0.915888	0.996	0.45	1.43753e-108
RPL29	1.17713e-112	0.879447	0.997	0.56	2.43948e-108
SRP72	1.23342e-112	0.950659	0.545	0.106	2.55614e-108
C1QTNF4	1.32713e-112	1.02823	0.319	0.016	2.75034e-108
EIF4A1	1.52833e-112	-0.810752	0.965	0.884	3.16732e-108
DUSP23	1.79383e-112	1.12245	0.375	0.039	3.71753e-108
ZNF428	1.88382e-112	0.981572	0.534	0.1	3.90402e-108
MAPRE1	1.99486e-112	0.971186	0.619	0.143	4.13414e-108
TOMM5	2.05142e-112	1.05671	0.411	0.053	4.25136e-108
MRPL54	2.69153e-112	0.976899	0.56	0.112	5.57792e-108
DYNLL2	3.05474e-112	1.04616	0.491	0.08	6.33064e-108
POLR2I	4.56531e-112	1.02402	0.392	0.045	9.46115e-108
MAZ	7.29299e-112	0.996596	0.672	0.17	1.5114e-107
RNF181	9.02536e-112	1.10625	0.468	0.077	1.87042e-107
PSMC5	1.45485e-111	1.06136	0.443	0.067	3.01503e-107
BEX1	1.70529e-111	1.63642	0.274	0.006	3.53404e-107
STOML2	2.02006e-111	1.03512	0.417	0.055	4.18636e-107
EIF3D	3.00918e-111	0.998821	0.674	0.177	6.23622e-107
ZFAND1	3.72402e-111	0.94976	0.365	0.034	7.71765e-107
STX11	3.86136e-111	1.21758	0.449	0.069	8.00229e-107
TMSB4X	8.77693e-111	-0.678923	0.999	0.911	1.81893e-106
DDAH2	1.19231e-110	1.00421	0.485	0.08	2.47094e-106
GTF3C6	1.19721e-110	1.03499	0.375	0.039	2.4811e-106
C19orf48	1.33035e-110	0.924245	0.413	0.048	2.75702e-106
DGUOK	1.41878e-110	1.01725	0.405	0.052	2.94028e-106
RWDD1	1.82789e-110	0.994317	0.43	0.059	3.78811e-106
TIMM10	2.20447e-110	1.06782	0.38	0.043	4.56855e-106
ICAM3	2.54894e-110	0.906283	0.71	0.184	5.28242e-106
GLRX	2.80148e-110	1.05152	0.33	0.024	5.8058e-106
NDUFA7	5.93593e-110	0.998699	0.395	0.048	1.23016e-105
NDUFAF8	5.99761e-110	1.03914	0.457	0.075	1.24295e-105
CKLF	7.28212e-110	1.0768	0.411	0.056	1.50915e-105
FAH	9.28543e-110	0.926921	0.339	0.025	1.92431e-105
STRAP	1.08273e-109	0.962303	0.654	0.162	2.24385e-105
NDUFB4	1.09931e-109	1.0713	0.465	0.079	2.27821e-105
LSM4	1.44446e-109	1.05907	0.442	0.066	2.9935e-105
CPSF6	1.67678e-109	0.853793	0.674	0.162	3.47496e-105
MFSD10	2.1561e-109	0.943616	0.86	0.279	4.46831e-105
NUDT1	2.20693e-109	1.05073	0.479	0.08	4.57364e-105
GNAI3	2.41175e-109	1.05316	0.494	0.087	4.99811e-105
NIT2	4.79769e-109	0.988141	0.368	0.036	9.94273e-105
RAC2	5.12292e-109	1.00749	0.683	0.173	1.06167e-104
PCBD1	6.3652e-109	1.03346	0.335	0.028	1.31912e-104
CHCHD10	6.52631e-109	1.02554	0.44	0.066	1.35251e-104
SELENOF	1.22951e-108	0.985501	0.391	0.047	2.54804e-104
LGALS3BP	1.63602e-108	0.917994	0.273	0.006	3.39048e-104
GNAS	1.68889e-108	-1.03525	0.844	0.821	3.50006e-104
PLAC8	1.92901e-108	0.954689	0.76	0.209	3.99768e-104
UAP1	2.00929e-108	1.0343	0.309	0.017	4.16405e-104
PGD	2.51538e-108	1.05502	0.556	0.117	5.21287e-104
GCSH	4.78848e-108	0.846411	0.273	0.007	9.92364e-104
PLPPR3	5.25964e-108	0.871562	0.704	0.171	1.09001e-103
YWHAQ	7.39026e-108	0.887982	0.626	0.148	1.53156e-103
MRPS24	8.32305e-108	1.00428	0.564	0.123	1.72487e-103
AC007952.4	8.46633e-108	-2.34572	0.19	0.626	1.75456e-103
ETHE1	9.19433e-108	1.01835	0.326	0.024	1.90543e-103
ZFAS1	9.67615e-108	0.988981	0.973	0.441	2.00528e-103
ORAI3	1.01106e-107	1.06015	0.365	0.038	2.09531e-103
ORMDL1	1.07101e-107	0.900804	0.571	0.119	2.21956e-103
OSGIN2	1.09679e-107	0.893631	0.6	0.129	2.27299e-103
HSD17B10	1.92865e-107	1.05694	0.365	0.039	3.99693e-103
METTL5	2.20522e-107	0.908049	0.31	0.018	4.57009e-103
EIF4EBP1	3.42472e-107	1.0609	0.395	0.05	7.09739e-103
RPA3	1.62272e-106	1.02476	0.294	0.015	3.36292e-102
H2AFZ	7.10652e-106	0.926093	0.877	0.286	1.47276e-101
PXK	7.7446e-106	0.931276	0.495	0.088	1.60499e-101
SRPK1	9.11236e-106	1.02633	0.444	0.066	1.88844e-101
LRRC59	1.02582e-105	0.950207	0.381	0.043	2.1259e-101
CALHM6	1.04289e-105	0.934676	0.24	0	2.16128e-101
MTDH	1.18554e-105	0.955341	0.812	0.254	2.45692e-101
CLIC1	1.94664e-105	1.06647	0.921	0.338	4.03422e-101
GTF2A2	2.10349e-105	1.01122	0.369	0.042	4.35928e-101
APMAP	2.88825e-105	1.00599	0.3	0.017	5.98561e-101
HADHA	2.91986e-105	0.93703	0.545	0.115	6.05112e-101
ATP2B1	3.87864e-105	0.884228	0.677	0.169	8.03809e-101
SET	5.42638e-105	0.996971	0.84	0.269	1.12456e-100
DNAJC8	6.94702e-105	0.992132	0.45	0.075	1.4397e-100
RPN2	9.54867e-105	0.990588	0.558	0.123	1.97887e-100
FDX1	1.53235e-104	1.01221	0.437	0.067	3.17564e-100
MYCBP2	1.9765e-104	-2.09664	0.371	0.692	4.09611e-100
DHRS7	2.5928e-104	1.01615	0.398	0.054	5.37332e-100
GTSF1	2.69425e-104	0.98894	0.287	0.014	5.58356e-100
LMAN2	2.84346e-104	1.0104	0.492	0.093	5.89279e-100
GTF2B	2.89464e-104	0.963504	0.525	0.103	5.99886e-100
PQBP1	2.93023e-104	0.978677	0.423	0.063	6.07262e-100
COMMD8	4.48055e-104	0.923867	0.322	0.025	9.2855e-100
MRPL41	4.61029e-104	0.931964	0.537	0.112	9.55437e-100
FUNDC2	5.19998e-104	0.935743	0.358	0.037	1.07764e-99
HEBP1	6.3866e-104	0.943063	0.3	0.018	1.32356e-99
AKIRIN1	9.33613e-104	0.874989	0.602	0.138	1.93482e-99
MICOS13	1.10396e-103	0.893334	0.571	0.126	2.28784e-99
HINT2	1.4397e-103	1.02347	0.322	0.026	2.98364e-99
LRPAP1	5.13892e-103	0.909708	0.566	0.128	1.06499e-98
HSPB11	5.6423e-103	1.00159	0.345	0.034	1.16931e-98
TMEM141	9.01377e-103	1.04482	0.319	0.026	1.86801e-98
VKORC1	1.13426e-102	0.999504	0.355	0.039	2.35064e-98
COPS3	1.24727e-102	0.923312	0.491	0.09	2.58484e-98
TCEAL4	1.61366e-102	0.897682	0.397	0.051	3.34415e-98
SUCNR1	2.20982e-102	1.00692	0.232	0	4.57964e-98
DRAP1	6.04596e-102	0.937575	0.608	0.151	1.25297e-97
MSRB2	6.9239e-102	1.04154	0.317	0.026	1.43491e-97
MPST	9.57345e-102	1.0435	0.466	0.087	1.984e-97
COX16	1.00574e-101	0.992375	0.355	0.04	2.0843e-97
ATXN10	1.1365e-101	0.9059	0.336	0.032	2.35529e-97
TRAPPC5	1.15915e-101	0.928418	0.863	0.291	2.40221e-97
PAM16	1.37138e-101	0.928942	0.465	0.082	2.84205e-97
KRT10	1.46265e-101	1.04659	0.443	0.077	3.0312e-97
SPCS2	1.60194e-101	0.979849	0.391	0.053	3.31986e-97
FOXC1	4.69067e-101	0.900627	0.229	0	9.72094e-97
CWC15	5.12762e-101	0.913853	0.449	0.076	1.06265e-96
RNASEH2B	5.32675e-101	0.796331	0.577	0.128	1.10392e-96
PA2G4	7.08525e-101	0.92281	0.557	0.125	1.46835e-96
GGCT	8.21963e-101	0.856472	0.355	0.039	1.70344e-96
COX14	1.11833e-100	1.04206	0.4	0.06	2.31762e-96
RSL1D1	1.21717e-100	0.868973	0.755	0.221	2.52246e-96
GRHPR	1.82783e-100	0.863081	0.392	0.051	3.788e-96
CKS2	2.07958e-100	1.0255	0.537	0.116	4.30973e-96
CTSG	2.4591e-100	1.02313	0.935	0.365	5.09624e-96
AP2M1	2.91119e-100	1.0197	0.469	0.09	6.03314e-96
SOD1	2.98297e-100	0.976075	0.408	0.061	6.1819e-96
KHDRBS1	4.06739e-100	0.866455	0.671	0.18	8.42925e-96
NDFIP1	4.10797e-100	0.859998	0.459	0.077	8.51336e-96
LGALS1	4.25365e-100	-2.36149	0.218	0.605	8.81526e-96
RPS8	5.72862e-100	0.757872	0.997	0.621	1.1872e-95
SMDT1	8.71599e-100	0.941998	0.392	0.055	1.8063e-95
S100P	9.91007e-100	1.32846	0.227	0	2.05376e-95
HHEX	1.01886e-99	0.945209	0.481	0.087	2.11149e-95
LAGE3	1.11713e-99	0.986923	0.346	0.037	2.31515e-95
LETMD1	1.59465e-99	0.892303	0.391	0.051	3.30475e-95
GAPDH	1.72948e-99	0.767293	0.999	0.612	3.58418e-95
PSMA4	1.81827e-99	0.852009	0.58	0.136	3.76819e-95
TMEM87A	1.96001e-99	0.940741	0.397	0.053	4.06193e-95
COX4I1	2.64686e-99	1.04497	0.964	0.375	5.48536e-95
TBC1D2B	2.74418e-99	0.816253	0.426	0.063	5.68703e-95
CASP4	5.00108e-99	0.871391	0.297	0.02	1.03642e-94
RAB13	5.45776e-99	0.988374	0.364	0.042	1.13107e-94
C20orf27	6.6024e-99	1.03214	0.326	0.031	1.36828e-94
WDR83OS	8.44916e-99	0.894597	0.749	0.226	1.751e-94
HADHB	1.0658e-98	0.879577	0.452	0.078	2.20877e-94
SERPINB10	1.43577e-98	1.07437	0.411	0.064	2.97549e-94
UQCC2	2.10077e-98	0.965841	0.388	0.055	4.35363e-94
SNRPG	2.13048e-98	0.973574	0.498	0.103	4.4152e-94
FAM174C	2.8813e-98	1.04898	0.356	0.043	5.9712e-94
BAZ1A	3.28915e-98	0.897706	0.481	0.09	6.81643e-94
ARF4	4.05684e-98	0.986422	0.437	0.076	8.40739e-94
CLK1	4.09991e-98	-1.27996	0.759	0.787	8.49665e-94
MYADM	4.97721e-98	-1.25685	0.776	0.774	1.03148e-93
UQCRC2	5.93886e-98	0.839163	0.535	0.117	1.23077e-93
SRP19	5.97367e-98	0.916014	0.387	0.052	1.23798e-93
C9orf78	6.25977e-98	0.906044	0.518	0.109	1.29728e-93
ARL6IP1	6.39202e-98	0.921077	0.782	0.243	1.32468e-93
CCNI	7.48016e-98	0.972935	0.913	0.353	1.55019e-93
RILPL2	9.49226e-98	0.866938	0.623	0.155	1.96718e-93
EIF4B	1.17056e-97	0.946308	0.776	0.249	2.42586e-93
PDIA6	1.36376e-97	0.92329	0.574	0.142	2.82626e-93
DUT	1.40007e-97	0.843749	0.665	0.172	2.9015e-93
SNHG25	1.47574e-97	-1.68561	0.518	0.722	3.05833e-93
EIF2S2	1.8068e-97	0.937713	0.431	0.075	3.7444e-93
CTNNB1	2.0653e-97	-1.22059	0.805	0.789	4.28013e-93
YTHDF2	2.24421e-97	0.879339	0.519	0.112	4.65089e-93
NDUFA12	2.53891e-97	0.895034	0.387	0.054	5.26165e-93
PSMB2	2.67007e-97	0.895274	0.421	0.07	5.53345e-93
ABHD14A	3.22951e-97	0.883269	0.283	0.018	6.69284e-93
SSNA1	3.74208e-97	0.974693	0.374	0.049	7.75509e-93
HSP90AA1	9.54644e-97	-0.778737	0.975	0.883	1.9784e-92
ATP5F1A	1.00476e-96	0.805385	0.677	0.182	2.08226e-92
MIF4GD	1.00755e-96	0.885216	0.26	0.011	2.08804e-92
MPLKIP	1.23066e-96	0.924513	0.333	0.034	2.55042e-92
C11orf74	1.24244e-96	0.885077	0.283	0.018	2.57483e-92
NOL7	1.42043e-96	0.838176	0.414	0.064	2.94371e-92
MATN4	1.99208e-96	0.795155	0.219	0	4.12839e-92
UBA52	2.38556e-96	0.959651	0.994	0.45	4.94383e-92
LAMTOR2	2.81825e-96	1.02711	0.414	0.07	5.84055e-92
TRAPPC1	2.887e-96	0.968877	0.463	0.09	5.98302e-92
RAB5IF	3.4936e-96	0.787546	0.817	0.254	7.24014e-92
PLIN3	3.52128e-96	0.824779	0.505	0.104	7.29749e-92
MSRB3	3.81288e-96	0.895577	0.434	0.073	7.9018e-92
GLUL	4.85135e-96	0.848381	0.811	0.26	1.00539e-91
TXN2	5.8917e-96	0.954218	0.378	0.054	1.221e-91
FAM30A	6.02377e-96	0.830465	0.221	0.001	1.24837e-91
GAMT	6.55569e-96	0.846683	0.427	0.068	1.3586e-91
EID1	9.13117e-96	0.963882	0.455	0.088	1.89234e-91
POLR2F	1.01043e-95	0.910639	0.326	0.033	2.09401e-91
ROMO1	1.09131e-95	0.988655	0.573	0.146	2.26163e-91
CCDC59	1.15796e-95	0.873472	0.613	0.156	2.39975e-91
BCAS2	1.23548e-95	0.87622	0.404	0.061	2.56041e-91
IAH1	1.49677e-95	0.97238	0.413	0.068	3.10191e-91
MED28	1.6321e-95	0.806973	0.442	0.074	3.38236e-91
TIMM9	1.66284e-95	0.910341	0.277	0.017	3.44608e-91
ANXA7	2.2114e-95	0.789548	0.561	0.128	4.5829e-91
MTRF1L	2.57614e-95	0.873435	0.469	0.089	5.33879e-91
EMC6	2.62527e-95	0.944894	0.349	0.041	5.4406e-91
MCL1	2.73386e-95	-0.65994	0.987	0.887	5.66566e-91
TM7SF3	2.93214e-95	0.808055	0.423	0.066	6.07656e-91
PRRC2C	4.11156e-95	-1.5611	0.613	0.754	8.5208e-91
AIG1	4.14058e-95	0.813154	0.216	0	8.58093e-91
ATOX1	6.30699e-95	0.932543	0.496	0.106	1.30706e-90
ATP5IF1	1.41703e-94	0.867194	0.683	0.192	2.93665e-90
CDK2AP1	1.93786e-94	0.945013	0.349	0.043	4.01601e-90
VDAC3	1.96209e-94	0.857798	0.39	0.056	4.06623e-90
SNHG17	2.37991e-94	0.800786	0.519	0.11	4.93213e-90
HLA-DQB1	4.38016e-94	-2.51025	0.075	0.505	9.07744e-90
Z93241.1	6.82972e-94	-2.68885	0.027	0.465	1.41539e-89
ARL6IP4	1.58332e-93	0.854476	0.734	0.227	3.28126e-89
AKAP13	1.95824e-93	-2.30424	0.091	0.52	4.05825e-89
MEAF6	2.02586e-93	0.918927	0.336	0.039	4.19839e-89
TMCO3	2.23728e-93	0.798142	0.495	0.099	4.63655e-89
SUPT4H1	2.2932e-93	0.878729	0.381	0.055	4.75244e-89
SMIM19	2.81683e-93	0.886937	0.306	0.027	5.8376e-89
BCLAF1	3.26726e-93	-1.09532	0.834	0.801	6.77108e-89
ACTN1	4.07595e-93	0.861559	0.531	0.117	8.447e-89
MRPL4	5.24757e-93	0.833452	0.446	0.083	1.08751e-88
FKBP1A	5.30666e-93	0.913632	0.582	0.149	1.09975e-88
CLEC2B	1.18281e-92	0.959251	0.903	0.334	2.45125e-88
MAX	1.42733e-92	0.817876	0.481	0.093	2.958e-88
CFAP36	1.74299e-92	0.796252	0.267	0.014	3.61217e-88
DYNLRB1	1.84295e-92	0.963984	0.387	0.061	3.81933e-88
SON	2.66821e-92	-1.26981	0.782	0.791	5.52961e-88
HIF1A	3.00839e-92	-1.40232	0.688	0.765	6.23459e-88
NMI	3.67361e-92	0.883105	0.286	0.021	7.61318e-88
PRMT1	3.83432e-92	0.894255	0.485	0.103	7.94624e-88
MRPL52	4.14329e-92	0.911986	0.418	0.075	8.58656e-88
CAMTA1	4.35161e-92	0.978123	0.404	0.071	9.01827e-88
SS18L2	4.79204e-92	0.917203	0.417	0.071	9.93103e-88
NDUFB7	4.84668e-92	0.859999	0.603	0.161	1.00443e-87
SAP18	7.15972e-92	0.948741	0.896	0.342	1.48378e-87
TLE4	7.51901e-92	-1.65898	0.544	0.723	1.55824e-87
APLP2	8.65773e-92	0.87565	0.781	0.258	1.79423e-87
ALYREF	1.38913e-91	0.863598	0.537	0.127	2.87884e-87
LAMTOR5	2.26605e-91	0.811121	0.586	0.15	4.69616e-87
PLEKHJ1	6.2048e-91	0.955325	0.339	0.043	1.28588e-86
ECH1	6.577e-91	0.837939	0.446	0.087	1.36302e-86
AHCY	7.59889e-91	0.847636	0.309	0.031	1.57479e-86
RPS19BP1	8.5347e-91	0.846129	0.424	0.077	1.76873e-86
SND1	8.68318e-91	0.928895	0.375	0.056	1.7995e-86
POLE4	8.76897e-91	1.07121	0.377	0.059	1.81728e-86
RPL37A	9.53982e-91	0.848565	0.994	0.475	1.97703e-86
NDUFS6	1.01211e-90	0.836324	0.602	0.162	2.09749e-86
PAICS	1.19139e-90	0.786697	0.296	0.025	2.46903e-86
HSBP1	1.88522e-90	0.792569	0.571	0.144	3.90693e-86
NDUFC1	2.87386e-90	0.848947	0.421	0.074	5.95578e-86
HDDC2	3.18003e-90	0.807725	0.319	0.035	6.5903e-86
SLBP	3.39426e-90	0.89889	0.397	0.063	7.03426e-86
RAB2A	4.44659e-90	0.864652	0.501	0.113	9.21511e-86
TMED9	4.74809e-90	0.843635	0.418	0.075	9.83994e-86
ERN1	4.91103e-90	0.875868	0.346	0.043	1.01776e-85
NUDT21	5.02101e-90	0.835653	0.338	0.041	1.04055e-85
CUEDC2	5.02561e-90	0.874484	0.372	0.056	1.04151e-85
BLOC1S1	7.80239e-90	0.868549	0.563	0.143	1.61697e-85
C1D	1.06886e-89	0.858039	0.392	0.063	2.2151e-85
MMADHC	1.41598e-89	0.864978	0.388	0.061	2.93447e-85
PSMD11	1.54288e-89	0.735828	0.532	0.121	3.19747e-85
STMN1	1.71755e-89	0.965501	0.284	0.023	3.55945e-85
MGST3	2.55759e-89	0.807165	0.475	0.1	5.30035e-85
GFOD1	2.6881e-89	0.847392	0.284	0.021	5.57083e-85
GHITM	3.06452e-89	0.80071	0.494	0.106	6.35092e-85
ITM2C	3.56251e-89	0.914208	0.287	0.025	7.38294e-85
C1orf162	3.63168e-89	0.939161	0.498	0.114	7.52629e-85
SARAF	3.87445e-89	0.816942	0.645	0.185	8.0294e-85
BEX4	4.07726e-89	0.809358	0.421	0.076	8.44971e-85
CHP1	5.57923e-89	0.942274	0.459	0.098	1.15624e-84
ITGAX	8.88426e-89	-2.41506	0.055	0.474	1.84117e-84
FHL3	9.60341e-89	0.889493	0.26	0.016	1.99021e-84
GYG1	1.06491e-88	1.10299	0.299	0.029	2.20692e-84
OCIAD1	1.16518e-88	0.820606	0.512	0.12	2.41472e-84
NDUFA2	1.17809e-88	0.878779	0.547	0.14	2.44147e-84
PPP1R15A	1.18337e-88	-1.17696	0.769	0.761	2.45243e-84
ICA1	1.49856e-88	0.81347	0.202	0	3.10561e-84
AZI2	1.842e-88	0.774362	0.299	0.027	3.81735e-84
PDCD5	2.01981e-88	0.843622	0.281	0.024	4.18586e-84
PIGP	2.42986e-88	0.826202	0.25	0.013	5.03565e-84
SCAND1	2.45758e-88	0.810299	0.762	0.244	5.09308e-84
TUBA1C	2.49545e-88	0.824834	0.558	0.138	5.17157e-84
MDH1	2.50807e-88	0.79337	0.304	0.031	5.19771e-84
GABARAPL2	2.99516e-88	0.861713	0.524	0.125	6.20716e-84
SNX2	3.44143e-88	0.780371	0.469	0.095	7.13202e-84
TMEM179B	4.34564e-88	0.899339	0.302	0.032	9.0059e-84
PNKD	4.80879e-88	0.864986	0.358	0.052	9.96573e-84
SNRPA	6.37479e-88	0.871712	0.424	0.08	1.32111e-83
MRPL3	6.69934e-88	0.76299	0.257	0.016	1.38837e-83
UBE2V1	7.29833e-88	0.817064	0.466	0.098	1.51251e-83
CENPV	8.49911e-88	0.821732	0.247	0.012	1.76135e-83
TNFSF13B	1.12168e-87	0.836224	0.427	0.082	2.32458e-83
NAA20	1.21744e-87	0.728192	0.258	0.016	2.52301e-83
MRPS12	1.31055e-87	0.825602	0.296	0.028	2.71597e-83
PCNP	1.57177e-87	0.817663	0.459	0.094	3.25733e-83
TMEM50A	1.662e-87	0.810126	0.443	0.089	3.44432e-83
PTGER2	1.75873e-87	0.850039	0.322	0.036	3.6448e-83
CITED4	2.11606e-87	0.828463	0.872	0.319	4.38533e-83
ARPC1B	2.8048e-87	0.889598	0.709	0.223	5.81266e-83
NAP1L1	3.14625e-87	0.90474	0.952	0.413	6.5203e-83
CD63	4.16368e-87	0.823699	0.866	0.309	8.62881e-83
MTF2	5.12868e-87	0.849786	0.45	0.09	1.06287e-82
PSME2	5.17496e-87	0.893754	0.407	0.075	1.07246e-82
ZNHIT1	6.1556e-87	0.789802	0.596	0.163	1.27569e-82
ZBTB7A	6.63803e-87	-1.5957	0.525	0.715	1.37566e-82
EIF1B	7.38939e-87	0.833385	0.866	0.315	1.53138e-82
RPS27	7.64523e-87	0.676957	1	0.594	1.5844e-82
VMP1	1.26591e-86	-1.31043	0.709	0.759	2.62346e-82
PGK1	1.30197e-86	0.769028	0.704	0.217	2.69821e-82
TRIB3	1.35991e-86	0.857964	0.198	0	2.81828e-82
AC244502.1	1.42892e-86	0.833971	0.202	0.001	2.9613e-82
TFDP2	1.72181e-86	0.770821	0.364	0.053	3.56828e-82
PKM	1.7825e-86	0.813815	0.799	0.275	3.69406e-82
NDUFS3	3.29051e-86	0.78413	0.434	0.084	6.81925e-82
GPSM1	4.42384e-86	0.801869	0.254	0.014	9.16797e-82
PSMB5	7.07729e-86	0.790813	0.261	0.018	1.4667e-81
CDC26	7.71504e-86	0.8645	0.289	0.028	1.59887e-81
PCLAF	1.11408e-85	0.991003	0.28	0.025	2.30882e-81
MCTS1	1.39543e-85	0.820227	0.355	0.053	2.89189e-81
METTL26	1.67655e-85	0.810119	0.582	0.152	3.47448e-81
TSPOAP1	2.24203e-85	0.804563	0.395	0.063	4.64637e-81
MRPS15	2.51307e-85	0.787468	0.4	0.072	5.20809e-81
HSP90B1	2.53752e-85	-1.10027	0.872	0.816	5.25876e-81
PNN	5.59341e-85	-1.11557	0.804	0.782	1.15918e-80
RNF114	5.66154e-85	0.724618	0.561	0.141	1.1733e-80
MRPS18C	6.26667e-85	0.8831	0.31	0.037	1.29871e-80
CRBN	8.23277e-85	0.771963	0.346	0.047	1.70616e-80
MZT1	9.99004e-85	0.846471	0.28	0.025	2.07034e-80
ATP6AP2	1.13441e-84	0.762216	0.563	0.145	2.35095e-80
RTF2	1.15693e-84	0.863354	0.408	0.077	2.39763e-80
PDCD6	1.33297e-84	0.758816	0.356	0.053	2.76246e-80
GLO1	1.51946e-84	0.866094	0.287	0.029	3.14892e-80
UCHL3	1.65539e-84	0.793638	0.287	0.027	3.43062e-80
TPI1	5.29704e-84	0.831174	0.856	0.303	1.09776e-79
HPRT1	8.25995e-84	0.790806	0.382	0.065	1.71179e-79
DMAC1	8.33696e-84	0.899938	0.271	0.024	1.72775e-79
PIN1	1.453e-83	0.820324	0.359	0.056	3.01119e-79
ZNRD1	1.54695e-83	0.826032	0.356	0.055	3.20591e-79
THYN1	2.09755e-83	0.805119	0.306	0.035	4.34697e-79
CEBPE	2.43579e-83	0.81755	0.19	0	5.04794e-79
RPL36	4.27709e-83	0.696433	0.996	0.582	8.86384e-79
PRDX3	4.28521e-83	0.781836	0.276	0.025	8.88067e-79
NDUFB6	5.28635e-83	0.848603	0.238	0.013	1.09554e-78
SNHG32	1.03991e-82	0.777709	0.742	0.238	2.15511e-78
NRBF2	1.04524e-82	0.830483	0.257	0.018	2.16615e-78
GAS6-AS1	1.08122e-82	0.739332	0.387	0.064	2.24072e-78
LINC02147	1.08588e-82	0.811133	0.189	0	2.25038e-78
C1orf43	1.7561e-82	0.793039	0.302	0.035	3.63934e-78
CST3	1.83435e-82	-1.33142	0.807	0.739	3.80151e-78
ODC1	2.37099e-82	0.711115	0.329	0.042	4.91365e-78
PRKCSH	2.62796e-82	0.774138	0.603	0.174	5.44618e-78
TMEM238	2.75047e-82	0.884033	0.284	0.029	5.70007e-78
ERP44	3.28012e-82	0.823431	0.336	0.049	6.79771e-78
MGAT4A	4.19044e-82	0.906359	0.232	0.011	8.68426e-78
TXNDC17	5.71035e-82	0.815303	0.28	0.027	1.18341e-77
CHMP2A	6.58884e-82	0.770081	0.55	0.149	1.36547e-77
PPDPF	7.17628e-82	0.815255	0.776	0.27	1.48721e-77
TXNRD1	7.99645e-82	0.728627	0.457	0.095	1.65718e-77
CLPP	1.04137e-81	0.780817	0.326	0.045	2.15813e-77
NDUFAF3	1.19721e-81	0.839611	0.375	0.067	2.4811e-77
SEC63	1.47595e-81	0.742392	0.479	0.108	3.05875e-77
ANAPC15	1.57504e-81	0.876419	0.315	0.042	3.26411e-77
HIKESHI	1.71778e-81	0.815418	0.253	0.019	3.55992e-77
EIF4H	1.81916e-81	0.755337	0.519	0.131	3.77003e-77
DPM3	2.12893e-81	0.92545	0.404	0.081	4.412e-77
POLR2J	2.20583e-81	0.815772	0.41	0.081	4.57136e-77
MIR222HG	2.37373e-81	-1.82985	0.381	0.643	4.91932e-77
SDHD	2.75449e-81	0.760791	0.286	0.029	5.7084e-77
LPCAT2	2.78043e-81	0.834838	0.316	0.041	5.76217e-77
HSPA5	3.04931e-81	-0.760778	0.947	0.858	6.3194e-77
ETFB	3.55579e-81	0.810479	0.468	0.109	7.36902e-77
ADRM1	4.88222e-81	0.76024	0.469	0.105	1.01179e-76
IER3IP1	5.66744e-81	0.831488	0.319	0.044	1.17452e-76
SARNP	8.68741e-81	0.780911	0.499	0.12	1.80038e-76
KRT17	9.55539e-81	0.779475	0.185	0	1.98026e-76
ZNF277	1.10425e-80	0.732848	0.251	0.018	2.28846e-76
RPL18A	1.42919e-80	-0.450045	0.994	0.918	2.96186e-76
NCK1	1.67113e-80	0.78151	0.303	0.035	3.46326e-76
MRPL21	1.67325e-80	0.755999	0.299	0.035	3.46764e-76
JPT1	3.54937e-80	0.863714	0.349	0.055	7.35572e-76
PRAM1	3.55808e-80	0.697359	0.505	0.116	7.37377e-76
SMIM20	3.72829e-80	0.794401	0.247	0.018	7.7265e-76
CMPK1	4.1342e-80	0.813481	0.39	0.073	8.56772e-76
ERCC1	4.62498e-80	0.817977	0.387	0.072	9.58481e-76
YES1	7.66823e-80	0.735505	0.234	0.013	1.58916e-75
C12orf57	8.78171e-80	0.671165	0.71	0.221	1.81992e-75
LINC01268	1.28931e-79	0.846481	0.241	0.016	2.67197e-75
TXNDC5	1.49009e-79	0.765237	0.24	0.016	3.08807e-75
ZNF22	1.62627e-79	0.696361	0.287	0.031	3.37028e-75
PSMA6	1.77506e-79	0.659889	0.644	0.193	3.67863e-75
SNF8	2.16163e-79	0.764268	0.4	0.077	4.47976e-75
PPA2	2.5961e-79	0.691496	0.348	0.054	5.38015e-75
IFT52	2.70165e-79	0.779744	0.244	0.017	5.59891e-75
NDUFA1	2.97354e-79	0.786368	0.635	0.194	6.16237e-75
ADSL	3.09043e-79	0.716723	0.299	0.035	6.4046e-75
SFPQ	3.09907e-79	-0.787576	0.932	0.825	6.42251e-75
CIB1	3.10513e-79	0.738746	0.53	0.136	6.43507e-75
MRPL22	3.11787e-79	0.757721	0.322	0.045	6.46148e-75
PAPOLA	3.4971e-79	0.711868	0.684	0.216	7.24739e-75
SQSTM1	4.10456e-79	-1.22514	0.73	0.748	8.5063e-75
ZNHIT3	5.5257e-79	0.716926	0.232	0.014	1.14515e-74
C12orf10	5.65515e-79	0.753354	0.283	0.031	1.17197e-74
SH2D1A	8.32318e-79	0.71557	0.18	0	1.7249e-74
SLC27A5	8.32318e-79	0.680907	0.18	0	1.7249e-74
CHCHD5	1.1954e-78	0.882757	0.368	0.068	2.47735e-74
GMPR2	1.53724e-78	0.747267	0.237	0.016	3.18578e-74
TMEM160	1.66404e-78	0.700776	0.56	0.154	3.44856e-74
ETFA	1.82178e-78	0.7396	0.31	0.041	3.77545e-74
FIBP	1.87257e-78	0.797971	0.369	0.066	3.88072e-74
PPIH	2.03127e-78	0.744466	0.294	0.035	4.2096e-74
XRCC5	2.88612e-78	0.701804	0.384	0.069	5.9812e-74
BST1	3.38391e-78	0.861263	0.273	0.028	7.01283e-74
GPR160	3.6812e-78	0.759725	0.179	0	7.62891e-74
SPNS2	3.6812e-78	0.67974	0.179	0	7.62891e-74
PKN1	4.08393e-78	0.764704	0.528	0.139	8.46353e-74
TMX2	4.90358e-78	0.770761	0.257	0.022	1.01622e-73
BCL7C	5.46876e-78	0.870017	0.346	0.06	1.13335e-73
SRP9	7.26085e-78	0.74055	0.378	0.069	1.50474e-73
NOB1	7.28905e-78	0.67949	0.251	0.02	1.51058e-73
ITGAL	8.62963e-78	-2.35271	0.007	0.386	1.7884e-73
MEF2D	8.81225e-78	-1.70291	0.439	0.655	1.82625e-73
CNPY2	8.92871e-78	0.696134	0.418	0.086	1.85039e-73
RHOG	1.20385e-77	0.735154	0.684	0.221	2.49485e-73
LSM6	1.56906e-77	0.766002	0.26	0.024	3.25172e-73
KCMF1	2.28959e-77	0.775955	0.362	0.063	4.74495e-73
CPNE1	2.89409e-77	0.784146	0.447	0.105	5.99772e-73
RPL41	3.7114e-77	0.644321	1	0.62	7.69151e-73
PLGRKT	3.84255e-77	0.722548	0.208	0.008	7.9633e-73
ARPC1A	3.87467e-77	0.699917	0.277	0.029	8.02986e-73
GPCPD1	5.28637e-77	-1.94871	0.3	0.6	1.09555e-72
ARPC5L	5.30099e-77	0.690121	0.528	0.136	1.09858e-72
COPE	5.69047e-77	0.704263	0.732	0.243	1.17929e-72
ANO7	7.17664e-77	0.671154	0.176	0	1.48729e-72
MRPL45	8.94129e-77	0.753266	0.251	0.022	1.85299e-72
PSMD9	1.08943e-76	0.773519	0.354	0.061	2.25773e-72
RHOA	1.11059e-76	0.753059	0.801	0.293	2.30159e-72
TWF2	1.15544e-76	0.782657	0.333	0.053	2.39453e-72
QDPR	1.17319e-76	0.731749	0.242	0.019	2.43132e-72
NAXE	1.21966e-76	0.802259	0.323	0.05	2.52762e-72
ZNF581	1.50412e-76	0.74422	0.303	0.039	3.11714e-72
MCRIP1	1.70274e-76	0.800425	0.473	0.116	3.52877e-72
NDUFB3	1.72637e-76	0.84521	0.261	0.027	3.57774e-72
FUOM	2.95492e-76	0.768342	0.244	0.02	6.12377e-72
ANXA3	3.16341e-76	0.939879	0.175	0	6.55584e-72
NXF3	3.62119e-76	0.872432	0.232	0.016	7.50456e-72
MTMR6	3.74627e-76	0.762957	0.326	0.047	7.76378e-72
SLC39A8	4.20615e-76	0.762469	0.225	0.013	8.71682e-72
SLC2A4RG	4.72884e-76	0.745765	0.351	0.059	9.80004e-72
EPS15	6.0646e-76	0.69336	0.417	0.085	1.25683e-71
HNRNPAB	7.06262e-76	0.715914	0.479	0.119	1.46366e-71
WDR61	1.21082e-75	0.754467	0.277	0.032	2.5093e-71
RPL27A	1.31825e-75	0.75481	0.991	0.524	2.73194e-71
DCP1A	1.42762e-75	0.702334	0.456	0.102	2.9586e-71
VBP1	1.60631e-75	0.721194	0.222	0.013	3.32893e-71
MRPL57	1.70902e-75	0.709951	0.608	0.182	3.54176e-71
DNAJC19	2.6486e-75	0.718304	0.219	0.013	5.48895e-71
SUCLG1	2.88728e-75	0.646061	0.371	0.066	5.9836e-71
FAM136A	3.35791e-75	0.749656	0.367	0.067	6.95894e-71
SELENOK	3.53791e-75	0.758059	0.491	0.125	7.33196e-71
COPS5	3.61067e-75	0.653694	0.316	0.046	7.48276e-71
KIF9	3.73292e-75	0.746829	0.257	0.024	7.7361e-71
PSMG1	3.9409e-75	0.672709	0.225	0.014	8.16712e-71
TGIF1	4.78785e-75	0.686718	0.346	0.055	9.92234e-71
MANF	4.78811e-75	0.764713	0.316	0.045	9.92289e-71
WDFY2	4.91172e-75	-1.7644	0.392	0.63	1.0179e-70
IDH2	5.98387e-75	0.770025	0.332	0.054	1.2401e-70
PSMB4	6.40225e-75	0.759845	0.478	0.121	1.3268e-70
ZDHHC24	1.03647e-74	0.746015	0.304	0.042	2.14798e-70
SPTBN1	1.24107e-74	0.76895	0.274	0.03	2.572e-70
UBB	1.41126e-74	0.796193	0.922	0.35	2.9247e-70
EAPP	1.9526e-74	0.703773	0.427	0.094	4.04657e-70
TPT1	2.46215e-74	0.603188	1	0.711	5.10255e-70
ACADM	2.64919e-74	0.715862	0.235	0.018	5.49018e-70
SEC11C	2.66215e-74	0.740494	0.255	0.025	5.51703e-70
GINM1	3.71327e-74	0.735246	0.339	0.056	7.69539e-70
SSU72	3.76575e-74	0.710137	0.508	0.135	7.80413e-70
PDRG1	3.85582e-74	0.698641	0.283	0.034	7.9908e-70
ENO1	4.25108e-74	0.819941	0.922	0.381	8.80994e-70
LINC01578	4.45619e-74	-0.736033	0.919	0.79	9.23502e-70
LMAN1	6.92193e-74	0.733312	0.319	0.048	1.4345e-69
NDUFA5	7.56984e-74	0.771095	0.315	0.048	1.56877e-69
RPS27L	8.39946e-74	0.734133	0.642	0.204	1.7407e-69
BAG1	1.17083e-73	0.656208	0.515	0.138	2.42643e-69
MS4A3	1.18093e-73	0.862605	0.169	0	2.44735e-69
JUN	1.68005e-73	-0.916428	0.886	0.79	3.48174e-69
CYBA	2.05639e-73	-0.522253	0.988	0.878	4.26165e-69
LSM14A	2.21777e-73	0.748044	0.356	0.066	4.59611e-69
IFI27L2	2.62581e-73	0.848596	0.439	0.108	5.44173e-69
TMEM183A	2.65151e-73	0.755115	0.397	0.083	5.49499e-69
NUCB1	2.93149e-73	0.766237	0.394	0.083	6.07521e-69
DSTYK	4.22528e-73	0.756581	0.44	0.101	8.75647e-69
BST2	5.81786e-73	0.821637	0.54	0.157	1.20569e-68
VMA21	6.39168e-73	0.61996	0.544	0.147	1.32461e-68
MDK	7.51626e-73	0.690099	0.185	0.004	1.55767e-68
TSSC4	8.05575e-73	0.735964	0.345	0.06	1.66947e-68
GNB1	9.98282e-73	0.720967	0.472	0.12	2.06884e-68
RBM27	1.22974e-72	0.694247	0.375	0.072	2.54851e-68
CCNB1IP1	1.25092e-72	0.702671	0.431	0.099	2.59241e-68
SVIP	1.33981e-72	0.942353	0.276	0.034	2.77662e-68
FGFR1OP2	1.80499e-72	0.704566	0.338	0.057	3.74066e-68
ZDHHC2	2.87768e-72	0.686337	0.245	0.023	5.9637e-68
PGAM1	3.05229e-72	0.798153	0.437	0.105	6.32557e-68
SCP2	4.00486e-72	0.78408	0.378	0.078	8.29968e-68
SNHG5	4.51868e-72	0.809774	0.945	0.404	9.3645e-68
IDH3B	5.66738e-72	0.712886	0.371	0.073	1.17451e-67
CNN2	6.77271e-72	0.831397	0.489	0.133	1.40358e-67
CCT5	8.04817e-72	0.704414	0.31	0.047	1.6679e-67
BLVRB	8.3219e-72	0.763468	0.384	0.079	1.72463e-67
MMP24OS	1.19226e-71	0.74312	0.427	0.1	2.47084e-67
CCT2	1.19483e-71	0.652216	0.584	0.175	2.47616e-67
SOX4	1.45612e-71	0.631293	0.584	0.167	3.01766e-67
EMC3	1.52449e-71	0.659608	0.381	0.076	3.15935e-67
C18orf32	1.7874e-71	0.746277	0.319	0.051	3.70421e-67
UBXN1	2.04202e-71	0.63223	0.608	0.187	4.23189e-67
TYW3	3.40593e-71	0.738764	0.264	0.031	7.05844e-67
SSR1	3.75062e-71	0.656098	0.401	0.087	7.77278e-67
PSMA3	4.35959e-71	0.643905	0.488	0.128	9.03481e-67
MAPK1IP1L	4.72474e-71	0.676133	0.519	0.144	9.79156e-67
MRPS34	1.57516e-70	0.69505	0.388	0.084	3.26437e-66
NUDC	2.84474e-70	0.633844	0.429	0.1	5.89544e-66
STX8	3.06653e-70	0.761754	0.266	0.033	6.35507e-66
PPP1R7	3.07265e-70	0.752066	0.284	0.04	6.36776e-66
COTL1	3.59303e-70	0.723714	0.633	0.206	7.4462e-66
SURF4	3.89029e-70	0.61841	0.553	0.159	8.06224e-66
ECI1	4.03237e-70	0.723547	0.273	0.035	8.35668e-66
BSG	5.07329e-70	0.659087	0.766	0.276	1.05139e-65
ERLIN1	6.10606e-70	0.678631	0.492	0.125	1.26542e-65
GLRX3	1.25294e-69	0.699096	0.302	0.046	2.59658e-65
TXNL1	1.64515e-69	0.650806	0.514	0.144	3.4094e-65
BAX	1.7086e-69	0.672006	0.528	0.152	3.54091e-65
LLPH	1.84627e-69	0.672968	0.47	0.122	3.82621e-65
STUB1	2.08111e-69	0.674005	0.447	0.111	4.31288e-65
ECSIT	2.73519e-69	0.674309	0.253	0.028	5.66841e-65
FAM204A	2.7841e-69	0.634131	0.43	0.101	5.76977e-65
GUK1	3.35066e-69	0.601252	0.688	0.235	6.9439e-65
NCOA7	3.85873e-69	0.679394	0.278	0.035	7.99682e-65
PHC2	4.58796e-69	0.74698	0.222	0.018	9.50809e-65
MACROD1	4.82782e-69	0.634369	0.228	0.019	1.00052e-64
RPP21	5.72406e-69	0.669064	0.209	0.013	1.18625e-64
TCEAL8	6.77396e-69	0.694648	0.235	0.023	1.40384e-64
DARS	1.02409e-68	0.610763	0.417	0.094	2.12232e-64
SPN	1.02806e-68	0.578661	0.665	0.216	2.13055e-64
GNAQ	1.14787e-68	0.656451	0.486	0.13	2.37884e-64
ANXA2R	1.20595e-68	0.760542	0.264	0.032	2.49921e-64
MRPL40	1.34724e-68	0.712198	0.227	0.02	2.79202e-64
HSPD1	1.46102e-68	-1.66322	0.655	0.701	3.02782e-64
AC002454.1	1.56002e-68	0.585221	0.157	0	3.23299e-64
GALNT1	1.87694e-68	0.662424	0.264	0.032	3.88976e-64
RALY	2.08479e-68	0.613383	0.495	0.137	4.32051e-64
EAF2	2.56069e-68	0.724564	0.469	0.128	5.30677e-64
NIFK	5.53728e-68	0.684372	0.309	0.049	1.14755e-63
NFU1	5.62304e-68	0.645325	0.218	0.017	1.16532e-63
NFE2	7.14075e-68	0.659963	0.276	0.036	1.47985e-63
MRPL12	8.12909e-68	0.664513	0.375	0.079	1.68467e-63
ATIC	8.60721e-68	0.685907	0.247	0.027	1.78376e-63
LYRM4	9.07541e-68	0.737077	0.266	0.035	1.88079e-63
MRPL37	1.13965e-67	0.708692	0.286	0.042	2.36181e-63
NELFE	1.14058e-67	0.762674	0.31	0.053	2.36374e-63
MYL6B	2.06176e-67	0.712714	0.255	0.032	4.27279e-63
MRPS35	2.5385e-67	0.614403	0.232	0.022	5.26078e-63
TCEAL3	3.16905e-67	0.620377	0.235	0.023	6.56754e-63
S1PR4	3.49052e-67	0.698573	0.229	0.021	7.23376e-63
TMEM18	3.64255e-67	0.723793	0.268	0.036	7.54883e-63
TMEM70	4.69169e-67	0.682522	0.264	0.034	9.72306e-63
CAP1	6.14955e-67	0.742024	0.472	0.135	1.27443e-62
RALBP1	6.30937e-67	0.708959	0.342	0.066	1.30755e-62
TSN	6.32139e-67	0.658908	0.268	0.035	1.31004e-62
MAF1	6.35246e-67	0.658625	0.384	0.086	1.31648e-62
GCA	1.11549e-66	0.805516	0.277	0.04	2.31175e-62
TUFM	1.60003e-66	0.593701	0.619	0.206	3.31591e-62
MED13L	1.60215e-66	-1.65838	0.45	0.636	3.3203e-62
ALG5	1.73668e-66	0.582769	0.228	0.021	3.59909e-62
DERL1	2.10084e-66	0.649386	0.485	0.13	4.35379e-62
DCTPP1	2.41365e-66	0.665884	0.206	0.016	5.00204e-62
CETN2	2.62037e-66	0.735474	0.224	0.021	5.43046e-62
ARMC10	3.28789e-66	0.644392	0.228	0.022	6.81382e-62
MPP1	3.63509e-66	0.64193	0.359	0.072	7.53337e-62
ORAI1	4.85862e-66	0.660727	0.31	0.051	1.0069e-61
SLC5A10	5.52151e-66	0.609491	0.152	0	1.14428e-61
EIF6	6.38455e-66	0.668581	0.411	0.1	1.32313e-61
CSTB	6.53938e-66	0.682321	0.463	0.127	1.35522e-61
TMEM35B	6.70328e-66	0.589102	0.199	0.013	1.38919e-61
EBP	6.9875e-66	0.693373	0.326	0.061	1.44809e-61
CLTB	7.49459e-66	0.755055	0.325	0.062	1.55318e-61
PTDSS1	8.38918e-66	0.749619	0.329	0.064	1.73857e-61
HMGB3	8.80358e-66	0.627161	0.276	0.039	1.82445e-61
ARF5	9.11121e-66	0.741543	0.38	0.088	1.88821e-61
CNOT7	1.01808e-65	0.720583	0.276	0.041	2.10988e-61
MCRIP2	1.55094e-65	0.582987	0.434	0.109	3.21417e-61
LSM1	1.7227e-65	0.658966	0.238	0.026	3.57013e-61
CALM3	1.76931e-65	0.679619	0.502	0.148	3.66672e-61
EMC7	1.7819e-65	0.623221	0.247	0.028	3.6928e-61
ARPC4	1.987e-65	0.705579	0.544	0.166	4.11786e-61
BCL11A	1.99394e-65	0.581271	0.297	0.047	4.13225e-61
NSMCE1	3.82775e-65	0.748979	0.304	0.054	7.93263e-61
UROS	4.09077e-65	0.625954	0.267	0.037	8.4777e-61
PSMD8	4.63801e-65	0.600122	0.561	0.175	9.6118e-61
SFT2D1	6.23536e-65	0.811803	0.261	0.036	1.29222e-60
STAT5A	1.06256e-64	0.647232	0.317	0.056	2.20204e-60
AGPAT2	1.16625e-64	0.760839	0.317	0.059	2.41694e-60
CTDNEP1	1.20451e-64	0.672369	0.455	0.124	2.49623e-60
F11R	2.06001e-64	0.720962	0.193	0.012	4.26916e-60
TRIAP1	2.74096e-64	0.697483	0.266	0.038	5.68038e-60
AC093673.1	2.99588e-64	0.759252	0.306	0.056	6.20866e-60
CHMP2B	3.06062e-64	0.718776	0.27	0.04	6.34282e-60
NCOA4	3.1152e-64	0.629379	0.55	0.172	6.45593e-60
TAF10	3.1406e-64	0.586233	0.567	0.18	6.50858e-60
ADH5	4.30883e-64	0.602163	0.293	0.047	8.92961e-60
MRPS27	4.32938e-64	0.638909	0.266	0.038	8.9722e-60
LKAAEAR1	4.45399e-64	0.632133	0.147	0	9.23045e-60
TAF12	5.12468e-64	0.62145	0.224	0.023	1.06204e-59
PELI1	5.56516e-64	0.537478	0.54	0.158	1.15332e-59
PLEK	5.75748e-64	-0.749676	0.919	0.791	1.19318e-59
GMPS	6.33822e-64	0.668694	0.263	0.037	1.31353e-59
AL035446.1	8.81619e-64	0.703194	0.198	0.014	1.82707e-59
ZNF493	9.21825e-64	0.700152	0.27	0.038	1.91039e-59
SLCO3A1	9.7863e-64	-2.11601	0.126	0.451	2.02811e-59
PMF1	1.07994e-63	0.691658	0.281	0.045	2.23808e-59
DHRS4L2	1.34108e-63	0.684539	0.227	0.024	2.77926e-59
CHMP5	1.43242e-63	0.652195	0.253	0.033	2.96856e-59
KPNA2	1.5234e-63	0.578749	0.53	0.157	3.15709e-59
POLR2L	1.97434e-63	0.666061	0.641	0.219	4.09163e-59
MRPL15	2.3607e-63	0.571348	0.189	0.011	4.89232e-59
RUVBL2	2.57032e-63	0.69523	0.261	0.038	5.32674e-59
PLEKHG2	2.93007e-63	-2.22922	0.013	0.337	6.07227e-59
HAUS4	3.10404e-63	0.618194	0.266	0.038	6.43281e-59
CCT3	3.11571e-63	0.698694	0.315	0.061	6.457e-59
PSMD4	3.37769e-63	0.705544	0.356	0.079	6.99992e-59
SUCO	3.61699e-63	0.688892	0.517	0.152	7.49584e-59
HYAL3	3.63994e-63	0.669558	0.183	0.01	7.54342e-59
UBE2L6	4.26932e-63	0.601797	0.198	0.014	8.84773e-59
FAM207A	4.82617e-63	0.677412	0.235	0.027	1.00018e-58
TESMIN	4.90965e-63	0.604592	0.229	0.025	1.01748e-58
YRDC	5.34809e-63	0.769024	0.25	0.033	1.10834e-58
SDHC	5.36219e-63	0.662718	0.276	0.043	1.11126e-58
CCT6A	5.83835e-63	0.625436	0.411	0.104	1.20994e-58
PAFAH1B3	7.0902e-63	0.636144	0.193	0.013	1.46937e-58
MOB4	7.36969e-63	0.615369	0.326	0.063	1.52729e-58
TMEM208	7.40009e-63	0.664233	0.257	0.035	1.53359e-58
MYL6	7.43457e-63	0.804854	0.964	0.411	1.54074e-58
AL034397.3	7.65489e-63	0.624056	0.535	0.16	1.5864e-58
CPNE2	8.26999e-63	0.646074	0.144	0	1.71387e-58
PPP1CC	9.13417e-63	0.625709	0.385	0.091	1.89297e-58
TPSB2	9.28594e-63	0.60115	0.188	0.011	1.92442e-58
EIF2A	1.51408e-62	0.500341	0.492	0.139	3.13777e-58
SFXN4	1.548e-62	0.599221	0.195	0.014	3.20808e-58
PSMG4	1.57596e-62	0.603788	0.199	0.015	3.26602e-58
CD38	1.69354e-62	0.60778	0.274	0.041	3.50968e-58
MFF	2.51585e-62	0.616878	0.294	0.05	5.21386e-58
DCTN2	3.27649e-62	0.651515	0.293	0.05	6.7902e-58
PIGT	3.83016e-62	0.503872	0.501	0.142	7.93762e-58
KRR1	3.84491e-62	0.547063	0.558	0.175	7.96818e-58
ZRANB1	3.86272e-62	0.656117	0.316	0.058	8.00511e-58
ZFAND5	3.97937e-62	-0.820748	0.902	0.801	8.24685e-58
RAB8A	5.73932e-62	0.591211	0.359	0.078	1.18942e-57
LSM12	5.90016e-62	0.72695	0.323	0.066	1.22275e-57
AL592183.1	6.01731e-62	0.780013	0.235	0.029	1.24703e-57
TSR3	7.14076e-62	0.629468	0.229	0.026	1.47985e-57
MICOS10	7.47117e-62	0.671579	0.532	0.169	1.54833e-57
SERBP1	7.60929e-62	0.571654	0.671	0.239	1.57695e-57
MPC1	7.68073e-62	0.628822	0.27	0.041	1.59175e-57
SQOR	9.31703e-62	0.639017	0.199	0.016	1.93086e-57
CTSA	1.41532e-61	0.538828	0.535	0.162	2.93312e-57
LBR	1.45764e-61	0.618975	0.501	0.147	3.02081e-57
MORN2	1.52887e-61	0.559097	0.141	0	3.16843e-57
MACF1	1.84723e-61	-1.71945	0.385	0.6	3.82821e-57
TESC	2.78799e-61	0.744925	0.343	0.076	5.77784e-57
GSTP1	3.00738e-61	0.786065	0.952	0.43	6.2325e-57
HOTAIRM1	3.13612e-61	0.690727	0.382	0.094	6.4993e-57
LRPPRC	3.15629e-61	0.528414	0.369	0.083	6.54109e-57
CMC2	3.5399e-61	0.651694	0.351	0.077	7.3361e-57
LCMT1	4.19026e-61	0.568545	0.195	0.014	8.6839e-57
MICAL1	5.8828e-61	-1.93977	0.118	0.443	1.21915e-56
MRPL23	6.752e-61	0.640509	0.444	0.124	1.39928e-56
SLC25A3	8.37624e-61	0.696906	0.908	0.388	1.73589e-56
PSMC1	8.53021e-61	0.519147	0.494	0.142	1.7678e-56
KARS	1.13149e-60	0.670144	0.341	0.075	2.34489e-56
LITAF	1.31148e-60	0.622276	0.491	0.147	2.71791e-56
PTBP1	1.47123e-60	0.501933	0.619	0.204	3.04897e-56
PSMD13	1.67421e-60	0.602132	0.349	0.077	3.46963e-56
CFAP298	1.81123e-60	0.607076	0.199	0.017	3.7536e-56
DERL2	1.86099e-60	0.646304	0.277	0.045	3.85672e-56
MCTP2	1.97514e-60	0.577235	0.3	0.053	4.09327e-56
SMARCD2	2.16143e-60	0.716317	0.28	0.047	4.47936e-56
PPP6C	2.19272e-60	0.626843	0.27	0.042	4.5442e-56
USE1	2.30692e-60	0.523727	0.348	0.074	4.78086e-56
HSPH1	2.33868e-60	-1.86651	0.369	0.577	4.84669e-56
PMPCB	2.44444e-60	0.529031	0.367	0.082	5.06585e-56
COL4A5	2.81419e-60	0.546083	0.139	0	5.83213e-56
XBP1	2.96715e-60	0.602823	0.821	0.324	6.14913e-56
IFT20	3.06836e-60	0.630662	0.369	0.087	6.35886e-56
ELP5	3.28669e-60	0.598265	0.199	0.017	6.81134e-56
HNRNPA0	3.94341e-60	0.566276	0.597	0.205	8.17233e-56
ULK1	5.294e-60	0.590163	0.413	0.103	1.09713e-55
FRG1	5.66606e-60	0.657254	0.328	0.069	1.17423e-55
PEF1	5.83455e-60	0.685624	0.224	0.026	1.20915e-55
PDAP1	5.94576e-60	0.621305	0.26	0.04	1.2322e-55
QARS	6.0987e-60	0.483724	0.457	0.124	1.26389e-55
RAB4A	7.38533e-60	0.611119	0.26	0.04	1.53054e-55
NDUFA6	7.83435e-60	0.659676	0.283	0.05	1.62359e-55
VPS37A	8.36939e-60	0.597413	0.228	0.026	1.73447e-55
EIF4G2	8.38657e-60	-0.86724	0.873	0.767	1.73803e-55
IFT57	8.8095e-60	0.550934	0.242	0.032	1.82568e-55
FKBP3	9.71917e-60	0.604255	0.276	0.046	2.0142e-55
SPNS3	9.98774e-60	0.531974	0.486	0.138	2.06986e-55
ARRDC4	1.20543e-59	0.607849	0.137	0	2.49813e-55
PAFAH1B2	1.69115e-59	0.506018	0.576	0.19	3.50473e-55
ANXA11	1.74161e-59	0.604906	0.489	0.15	3.60932e-55
QPRT	2.01232e-59	0.554932	0.173	0.009	4.17033e-55
COX11	2.29761e-59	0.569218	0.192	0.016	4.76158e-55
FMC1	2.37393e-59	0.703977	0.263	0.043	4.91973e-55
TEX264	2.71438e-59	0.660462	0.266	0.043	5.62529e-55
POLR2G	2.86331e-59	0.656493	0.326	0.069	5.93393e-55
ANXA2	2.8663e-59	-1.98017	0.097	0.41	5.94012e-55
C14orf119	2.94703e-59	0.557778	0.167	0.008	6.10743e-55
MYO1F	4.02443e-59	-1.71418	0.309	0.563	8.34023e-55
EIF4A2	4.38042e-59	-1.02049	0.76	0.718	9.07799e-55
SPATA2	4.68422e-59	0.547861	0.317	0.063	9.70758e-55
LXN	5.15774e-59	0.574574	0.136	0	1.06889e-54
MSI2	6.37177e-59	0.562332	0.397	0.097	1.32049e-54
ATP1B3	7.30159e-59	0.524179	0.368	0.086	1.51318e-54
CAPZB	9.08519e-59	0.616497	0.466	0.14	1.88281e-54
CDC123	9.86436e-59	0.63203	0.268	0.043	2.04429e-54
EIF5A	1.01631e-58	0.675614	0.833	0.339	2.10621e-54
DENR	1.04902e-58	0.689001	0.325	0.07	2.17399e-54
RELL1	1.04917e-58	0.683069	0.222	0.026	2.17429e-54
AC004865.2	1.09494e-58	0.659266	0.186	0.014	2.26916e-54
CEP57	1.212e-58	0.571627	0.258	0.04	2.51176e-54
SUCLG2	1.74109e-58	0.638516	0.229	0.03	3.60824e-54
RIN3	2.0394e-58	0.623634	0.349	0.077	4.22645e-54
NUDT5	2.11606e-58	0.658205	0.231	0.031	4.38533e-54
RRAGD	2.20451e-58	0.598066	0.134	0	4.56862e-54
AATF	2.38579e-58	0.605582	0.26	0.041	4.9443e-54
RHEB	2.47467e-58	0.478069	0.489	0.146	5.12851e-54
COPS6	2.47687e-58	0.531162	0.416	0.11	5.13306e-54
ADA	2.54151e-58	0.51891	0.254	0.037	5.26702e-54
POLR2C	2.57666e-58	0.562992	0.216	0.024	5.33988e-54
NDUFA10	2.6366e-58	0.412056	0.488	0.14	5.4641e-54
LAMP2	2.65712e-58	0.548419	0.475	0.14	5.50661e-54
SEPHS2	2.6601e-58	0.658129	0.267	0.043	5.51279e-54
TMCO1	2.80714e-58	0.614389	0.291	0.054	5.81753e-54
CD59	3.26109e-58	0.68836	0.227	0.028	6.75829e-54
MRPS23	3.59523e-58	0.590778	0.172	0.01	7.45075e-54
JDP2	3.61955e-58	0.617237	0.224	0.026	7.50115e-54
CPVL	3.64379e-58	0.605264	0.198	0.018	7.5514e-54
HAX1	3.80658e-58	0.600411	0.218	0.026	7.88876e-54
CYTH4	3.88495e-58	-2.04862	0.017	0.322	8.05117e-54
TIMP2	4.25124e-58	0.623027	0.364	0.087	8.81027e-54
KLF3	4.37676e-58	0.663512	0.192	0.016	9.0704e-54
TIMM8B	4.46684e-58	0.679563	0.278	0.051	9.25709e-54
ABCE1	6.99637e-58	0.577361	0.271	0.046	1.44993e-53
GTF2H5	7.01051e-58	0.624861	0.208	0.023	1.45286e-53
PCMT1	7.85993e-58	0.60588	0.235	0.031	1.62889e-53
ABCB7	1.07647e-57	0.528207	0.25	0.036	2.23087e-53
TOP1MT	1.08947e-57	0.576156	0.405	0.108	2.25782e-53
PARL	1.35676e-57	0.694298	0.325	0.073	2.81174e-53
M6PR	1.70089e-57	0.539404	0.427	0.116	3.52492e-53
MRPS16	1.97133e-57	0.637416	0.248	0.038	4.08539e-53
TENT5A	2.09705e-57	0.645937	0.903	0.409	4.34592e-53
RPN1	2.19824e-57	0.56819	0.462	0.137	4.55564e-53
CCL3	2.36926e-57	-2.04347	0.072	0.381	4.91005e-53
PAIP1	2.37407e-57	0.532789	0.266	0.043	4.92001e-53
CRYBG1	2.47222e-57	-1.96683	0.051	0.357	5.12344e-53
RPIA	2.50055e-57	0.59263	0.224	0.028	5.18215e-53
MEA1	2.67572e-57	0.566247	0.18	0.013	5.54515e-53
INKA1	4.01436e-57	0.534276	0.131	0	8.31935e-53
AC016735.1	4.01436e-57	0.598195	0.131	0	8.31935e-53
SEPTIN6	4.65505e-57	0.528109	0.532	0.176	9.64713e-53
C17orf49	4.95121e-57	0.582304	0.43	0.121	1.02609e-52
VPS28	5.55328e-57	0.49506	0.561	0.189	1.15086e-52
DAZAP2	5.6147e-57	0.581735	0.726	0.275	1.16359e-52
RNF6	5.91122e-57	0.607837	0.241	0.034	1.22504e-52
METTL9	5.9689e-57	0.616121	0.45	0.134	1.23699e-52
MATK	7.64121e-57	0.572144	0.245	0.035	1.58356e-52
FARSA	9.35071e-57	0.587301	0.237	0.033	1.93784e-52
GAR1	9.51439e-57	0.636753	0.206	0.023	1.97176e-52
ADI1	9.69901e-57	0.636651	0.253	0.04	2.01002e-52
FKBP4	1.28069e-56	0.553122	0.202	0.02	2.6541e-52
SDHB	1.35661e-56	0.624357	0.286	0.055	2.81145e-52
RSRP1	1.48287e-56	-1.1152	0.691	0.695	3.0731e-52
ZNF511	1.53705e-56	0.554314	0.326	0.071	3.18538e-52
MED8	1.57364e-56	0.545549	0.166	0.009	3.2612e-52
DHPS	1.5964e-56	0.610083	0.235	0.033	3.30838e-52
TSPYL1	2.18788e-56	0.535966	0.421	0.118	4.53417e-52
EMC4	2.6533e-56	0.578493	0.232	0.033	5.49871e-52
TYROBP	2.88436e-56	0.705417	0.629	0.224	5.97756e-52
RBM7	3.36596e-56	0.515696	0.418	0.115	6.97562e-52
PPP1CA	3.47743e-56	0.604281	0.468	0.14	7.20663e-52
ADIPOR2	3.52917e-56	0.662995	0.185	0.016	7.31385e-52
PSMD6	3.7684e-56	0.413818	0.551	0.174	7.80963e-52
NIBAN1	4.22562e-56	0.532846	0.152	0.005	8.75718e-52
STAR	4.3712e-56	0.513801	0.166	0.01	9.05887e-52
HOXA10	4.76657e-56	0.583284	0.392	0.103	9.87823e-52
CCNY	5.34804e-56	0.54567	0.241	0.035	1.10833e-51
PSENEN	5.45439e-56	0.631956	0.208	0.024	1.13037e-51
BSCL2	5.97933e-56	0.652523	0.241	0.036	1.23916e-51
COL23A1	6.43669e-56	0.620852	0.198	0.02	1.33394e-51
C12orf76	6.73015e-56	0.605459	0.189	0.017	1.39476e-51
HTRA3	6.77396e-56	0.559768	0.208	0.023	1.40383e-51
WASF2	7.38095e-56	0.515857	0.341	0.077	1.52963e-51
CMC1	8.5209e-56	0.609964	0.212	0.026	1.76587e-51
YIF1A	1.13625e-55	0.533256	0.216	0.027	2.35476e-51
LINC00623	1.2194e-55	0.661544	0.333	0.08	2.52708e-51
IRS2	1.22962e-55	0.6166	0.475	0.147	2.54826e-51
MAPKAPK3	1.30898e-55	0.493993	0.374	0.093	2.71272e-51
TAX1BP1	1.32881e-55	0.512298	0.465	0.137	2.75382e-51
CYCS	1.37675e-55	0.540721	0.765	0.292	2.85318e-51
BFAR	1.57094e-55	0.5838	0.212	0.025	3.25561e-51
RBX1	1.65998e-55	0.581561	0.469	0.145	3.44015e-51
RNF125	1.7358e-55	0.59996	0.196	0.019	3.59728e-51
CACUL1	1.79328e-55	0.567012	0.345	0.08	3.71639e-51
MRPL13	1.8388e-55	0.567039	0.192	0.018	3.81073e-51
PMVK	1.92557e-55	0.597659	0.176	0.013	3.99055e-51
MRPL38	1.99044e-55	0.533406	0.304	0.062	4.12499e-51
KIAA1143	3.0727e-55	0.573476	0.227	0.031	6.36787e-51
NCBP2AS2	3.24864e-55	0.541986	0.273	0.049	6.73249e-51
RAP1A	3.66726e-55	0.575598	0.276	0.05	7.60003e-51
NUS1	5.25006e-55	0.587752	0.242	0.037	1.08802e-50
G3BP1	5.54911e-55	0.61658	0.348	0.083	1.15e-50
EPC1	5.92502e-55	0.501864	0.683	0.257	1.2279e-50
C7orf50	6.41111e-55	0.676123	0.28	0.055	1.32864e-50
DDRGK1	9.4323e-55	0.601557	0.276	0.052	1.95475e-50
ITGA5	9.9142e-55	-1.50403	0.514	0.638	2.05462e-50
NUDCD2	9.96072e-55	0.538136	0.241	0.037	2.06426e-50
SH3GLB1	1.10517e-54	0.513168	0.488	0.154	2.29036e-50
CILP2	1.31419e-54	0.532594	0.126	0	2.72353e-50
NAE1	1.39412e-54	0.567854	0.234	0.034	2.88917e-50
OSTF1	1.39798e-54	0.665131	0.315	0.071	2.89717e-50
TIPRL	1.75204e-54	0.586039	0.247	0.039	3.63093e-50
SSB	1.82067e-54	0.456268	0.563	0.188	3.77315e-50
PGM1	1.98479e-54	0.6022	0.172	0.013	4.11328e-50
PRKRA	1.98759e-54	0.527351	0.281	0.053	4.11909e-50
FAAP20	2.17892e-54	0.488684	0.483	0.15	4.5156e-50
CD33	2.20738e-54	0.478862	0.358	0.086	4.57457e-50
BNIP2	2.39999e-54	0.517492	0.485	0.151	4.97374e-50
NOA1	2.68104e-54	0.583145	0.18	0.016	5.55618e-50
VPS29	2.91816e-54	0.557223	0.452	0.138	6.0476e-50
PRKAR1A	3.08608e-54	0.586865	0.391	0.107	6.39559e-50
LTA4H	3.40398e-54	0.638673	0.32	0.073	7.0544e-50
ADAM8	3.73359e-54	-1.94216	0.023	0.312	7.73749e-50
USP47	5.35073e-54	0.448844	0.521	0.168	1.10889e-49
EXOSC1	5.469e-54	0.592433	0.228	0.033	1.1334e-49
TPST2	5.7293e-54	0.683555	0.193	0.02	1.18734e-49
TIMM17A	6.30786e-54	0.553504	0.42	0.12	1.30724e-49
LYPLA1	6.47361e-54	0.519183	0.371	0.095	1.34159e-49
ASAH1	6.98588e-54	0.430885	0.671	0.241	1.44775e-49
NTPCR	7.13862e-54	0.594843	0.208	0.026	1.47941e-49
DRAM2	7.68626e-54	0.593786	0.289	0.06	1.5929e-49
SNX17	8.16295e-54	0.577206	0.222	0.03	1.69169e-49
CDK6	8.28345e-54	0.499319	0.544	0.186	1.71666e-49
GNG10	9.61649e-54	0.555606	0.203	0.024	1.99292e-49
ETFRF1	1.2013e-53	0.557367	0.195	0.021	2.48957e-49
C16orf74	1.25582e-53	0.588749	0.263	0.048	2.60256e-49
SLIRP	1.57189e-53	0.605045	0.32	0.075	3.25758e-49
CIAO2B	1.80838e-53	0.604826	0.349	0.09	3.74768e-49
HSP90AB1	1.85012e-53	-0.650987	0.918	0.788	3.83419e-49
ACBD6	1.86569e-53	0.522916	0.241	0.038	3.86645e-49
EBNA1BP2	1.87257e-53	0.507299	0.17	0.013	3.88072e-49
TAF1D	2.10279e-53	0.467838	0.697	0.263	4.35782e-49
RAB9A	2.20178e-53	0.480667	0.277	0.053	4.56297e-49
MBD4	2.30965e-53	0.50059	0.437	0.129	4.78653e-49
MRPL43	2.32012e-53	0.54766	0.177	0.015	4.80821e-49
GCAT	2.36271e-53	0.503292	0.123	0	4.89648e-49
PDIA4	2.38733e-53	0.645719	0.255	0.045	4.94751e-49
TMEM134	2.46381e-53	0.610752	0.193	0.021	5.10599e-49
TMED10	2.80399e-53	0.509341	0.416	0.12	5.81098e-49
NUCKS1	3.35035e-53	0.567007	0.436	0.133	6.94327e-49
OGFOD3	3.44106e-53	0.530525	0.172	0.013	7.13124e-49
BUD23	3.67374e-53	0.573698	0.368	0.095	7.61346e-49
RNASEK	5.26986e-53	0.63847	0.918	0.398	1.09212e-48
HAT1	5.9617e-53	0.471801	0.427	0.123	1.2355e-48
FNDC3B	6.10183e-53	0.447627	0.472	0.143	1.26454e-48
PSMD12	9.62383e-53	0.470067	0.545	0.184	1.99444e-48
CDIP1	1.00023e-52	0.465971	0.121	0	2.07287e-48
POP5	1.06518e-52	0.609296	0.24	0.039	2.20748e-48
PRCP	1.26681e-52	0.607259	0.244	0.041	2.62533e-48
CDK4	1.38876e-52	0.567923	0.24	0.039	2.87807e-48
HAUS1	1.46657e-52	0.5632	0.179	0.017	3.03931e-48
UNC119B	1.55934e-52	0.521742	0.154	0.009	3.23159e-48
CENPX	1.57496e-52	0.589458	0.248	0.043	3.26394e-48
AKIRIN2	1.61216e-52	0.48263	0.576	0.2	3.34104e-48
CEP170	1.64806e-52	0.56391	0.392	0.107	3.41544e-48
CUL5	1.8164e-52	0.494146	0.349	0.086	3.76431e-48
COPZ1	1.98671e-52	0.665786	0.225	0.035	4.11726e-48
BCL2A1	2.00031e-52	0.724359	0.266	0.05	4.14544e-48
GNAI2	2.13655e-52	0.558918	0.724	0.282	4.4278e-48
GBE1	2.19416e-52	0.626482	0.177	0.016	4.54718e-48
LUZP1	2.4548e-52	0.366922	0.456	0.131	5.08732e-48
MRPL48	2.50405e-52	0.567918	0.189	0.02	5.18938e-48
LYST	2.54123e-52	-1.21018	0.672	0.684	5.26644e-48
ENSA	3.17026e-52	0.549113	0.496	0.167	6.57005e-48
YIPF3	3.52268e-52	0.587192	0.224	0.033	7.3004e-48
UPF2	4.01803e-52	-1.90227	0.222	0.482	8.32696e-48
RSRC2	5.15366e-52	-1.14	0.678	0.679	1.06804e-47
SLC25A11	5.1654e-52	0.591485	0.229	0.036	1.07048e-47
MRFAP1	5.28179e-52	0.488522	0.443	0.136	1.0946e-47
TARDBP	5.73132e-52	0.432945	0.628	0.228	1.18776e-47
CAPG	5.74396e-52	-1.75332	0.091	0.381	1.19038e-47
KYAT3	5.90688e-52	0.463981	0.159	0.01	1.22414e-47
AK3	7.58069e-52	0.550839	0.238	0.039	1.57102e-47
NXT1	7.75682e-52	0.677478	0.335	0.085	1.60752e-47
RNF138	8.74077e-52	0.540249	0.43	0.131	1.81144e-47
COG3	8.83819e-52	0.600964	0.346	0.089	1.83163e-47
SPAG7	1.24486e-51	0.478314	0.302	0.065	2.57985e-47
TRAPPC2B	1.29695e-51	0.574973	0.163	0.012	2.68779e-47
RREB1	1.6359e-51	0.411247	0.465	0.141	3.39025e-47
TRAPPC4	1.71043e-51	0.587022	0.291	0.062	3.5447e-47
MTX1	1.99943e-51	0.528121	0.302	0.065	4.14361e-47
NASP	2.50206e-51	0.552078	0.455	0.142	5.18526e-47
TRAM1	2.86818e-51	0.490962	0.494	0.161	5.94402e-47
LRMDA	3.65911e-51	0.511382	0.32	0.076	7.58314e-47
IFI6	3.7432e-51	0.681201	0.188	0.021	7.7574e-47
ARL2BP	3.82535e-51	0.549476	0.247	0.043	7.92765e-47
NFE2L2	4.0868e-51	0.486797	0.299	0.064	8.46949e-47
ST3GAL4	4.20835e-51	0.546532	0.248	0.043	8.72138e-47
IRF8	4.29022e-51	-1.73372	0.006	0.276	8.89105e-47
ZNRF1	4.34795e-51	0.488956	0.19	0.021	9.01069e-47
REST	4.49581e-51	0.437399	0.304	0.066	9.31712e-47
DPY30	4.5024e-51	0.582623	0.17	0.015	9.33078e-47
BCL7B	4.56397e-51	0.527629	0.371	0.1	9.45838e-47
LZIC	6.15864e-51	0.523604	0.177	0.017	1.27632e-46
DEK	6.281e-51	0.473385	0.488	0.157	1.30168e-46
JARID2	6.52339e-51	-1.43558	0.505	0.616	1.35191e-46
PPIG	6.90895e-51	0.440063	0.456	0.14	1.43181e-46
JAGN1	8.22794e-51	0.515194	0.162	0.012	1.70516e-46
TMBIM4	8.92569e-51	0.470858	0.442	0.133	1.84976e-46
ZNF529	9.17146e-51	0.516519	0.216	0.031	1.90069e-46
STK17B	9.2555e-51	0.530129	0.798	0.333	1.91811e-46
MPEG1	9.43245e-51	-1.79285	0	0.265	1.95478e-46
NDUFA8	1.0017e-50	0.559999	0.172	0.016	2.07593e-46
HEXA	1.17335e-50	0.511852	0.556	0.198	2.43166e-46
CRK	1.18877e-50	0.511191	0.231	0.036	2.46361e-46
RCN2	1.48074e-50	0.543345	0.287	0.061	3.06869e-46
CMTM7	1.70034e-50	0.587992	0.176	0.017	3.52378e-46
COMMD7	2.10867e-50	0.532039	0.338	0.086	4.37001e-46
TMEM106C	2.325e-50	0.642232	0.143	0.007	4.81833e-46
MEGF6	2.44143e-50	0.481554	0.221	0.032	5.05962e-46
EIF2AK2	2.84033e-50	0.504149	0.248	0.045	5.8863e-46
NONO	2.87398e-50	0.469187	0.657	0.25	5.95604e-46
MRPL42	2.98127e-50	0.490977	0.263	0.05	6.17838e-46
FAM126B	3.58112e-50	0.567638	0.345	0.087	7.4215e-46
ID1	3.79004e-50	0.614062	0.183	0.019	7.85449e-46
GFER	5.10136e-50	0.529965	0.215	0.032	1.05721e-45
BLOC1S2	5.45699e-50	0.530695	0.397	0.116	1.13091e-45
HEBP2	5.67193e-50	0.507277	0.365	0.101	1.17545e-45
MARCH5	5.87749e-50	0.531046	0.254	0.048	1.21805e-45
PSMB8	7.67375e-50	0.539207	0.302	0.069	1.59031e-45
COA4	1.28498e-49	0.553674	0.203	0.028	2.66299e-45
GIPC1	1.33875e-49	0.492658	0.114	0	2.77443e-45
FRMD3	1.33875e-49	0.511596	0.114	0	2.77443e-45
CCNH	1.35646e-49	0.524452	0.354	0.095	2.81113e-45
PBDC1	1.45467e-49	0.485194	0.358	0.094	3.01467e-45
SLC39A4	1.47622e-49	0.57921	0.163	0.014	3.05931e-45
BCL2L13	1.498e-49	0.579594	0.237	0.041	3.10446e-45
MRPS18B	1.72542e-49	0.493329	0.157	0.012	3.57576e-45
NAA38	1.78408e-49	0.535	0.543	0.191	3.69733e-45
UBA2	1.78473e-49	0.495744	0.362	0.098	3.69867e-45
LARP1	1.91522e-49	0.464684	0.309	0.071	3.96909e-45
PDHA1	2.20815e-49	0.43365	0.328	0.079	4.57617e-45
HSD17B12	2.63018e-49	0.526556	0.25	0.047	5.45079e-45
CSDE1	3.03297e-49	0.537208	0.831	0.346	6.28553e-45
NDUFA13	3.23455e-49	0.582636	0.911	0.397	6.70329e-45
MIEN1	3.2421e-49	0.5354	0.268	0.056	6.71892e-45
SLC40A1	3.81808e-49	0.647436	0.133	0.005	7.91259e-45
MAN1A2	3.86559e-49	0.50611	0.291	0.065	8.01104e-45
DRAM1	4.15073e-49	0.577243	0.27	0.055	8.60198e-45
PHF5A	4.56725e-49	0.558341	0.179	0.02	9.46517e-45
AC103591.3	4.79897e-49	-1.70318	0.372	0.553	9.94538e-45
ZC3HAV1	5.00828e-49	0.534322	0.381	0.106	1.03792e-44
ZNF395	5.46896e-49	0.5305	0.139	0.006	1.13339e-44
NUDT2	5.63196e-49	0.446649	0.113	0	1.16717e-44
ATP5F1B	5.79036e-49	0.524153	0.781	0.32	1.19999e-44
MSRB1	6.64979e-49	0.650325	0.175	0.018	1.3781e-44
SRGAP2	8.08453e-49	-1.72801	0.014	0.279	1.67544e-44
TMEM170A	8.15686e-49	0.582632	0.3	0.071	1.69043e-44
INTS10	8.37647e-49	0.395556	0.32	0.076	1.73594e-44
PFN1	8.38237e-49	0.704621	0.931	0.393	1.73716e-44
NFIC	8.59474e-49	0.455174	0.368	0.101	1.78117e-44
PSMF1	9.09309e-49	0.516368	0.206	0.031	1.88445e-44
ERVK3-1	9.27951e-49	0.528709	0.241	0.043	1.92309e-44
CZIB	1.07043e-48	0.510376	0.212	0.032	2.21836e-44
ABT1	1.07619e-48	0.520714	0.216	0.033	2.23031e-44
PUM1	1.10843e-48	0.43779	0.544	0.191	2.29711e-44
NDUFS8	1.11013e-48	0.365061	0.564	0.203	2.30064e-44
SKP1	1.11397e-48	0.523507	0.856	0.376	2.30859e-44
RAB11A	1.12822e-48	0.576278	0.3	0.071	2.33811e-44
APPL1	1.14621e-48	0.433441	0.424	0.128	2.37541e-44
RBMX	1.18837e-48	0.472459	0.693	0.276	2.46277e-44
TKT	1.25165e-48	0.587109	0.9	0.411	2.59391e-44
AP2S1	1.26398e-48	0.423333	0.672	0.265	2.61948e-44
CCND2	1.31153e-48	0.494173	0.192	0.024	2.71802e-44
TUSC2	1.39395e-48	0.542174	0.167	0.016	2.88882e-44
GPAA1	1.58689e-48	0.525551	0.313	0.076	3.28866e-44
ITGB2-AS1	1.75638e-48	-1.84725	0.003	0.26	3.63992e-44
C11orf58	2.01822e-48	0.372824	0.494	0.164	4.18256e-44
THG1L	2.01966e-48	0.478925	0.153	0.011	4.18554e-44
MRPL20	2.24756e-48	0.525265	0.293	0.067	4.65784e-44
PDIA5	2.36684e-48	0.422662	0.111	0	4.90505e-44
TMEM220	2.36684e-48	0.442637	0.111	0	4.90505e-44
RER1	2.95176e-48	0.41462	0.329	0.083	6.11722e-44
IGFBP7	2.95534e-48	0.567547	0.355	0.101	6.12465e-44
MARCKSL1	3.24374e-48	0.510998	0.369	0.105	6.72233e-44
CDADC1	3.25322e-48	0.607824	0.287	0.065	6.74197e-44
MRPS30	3.50271e-48	0.465451	0.257	0.05	7.25901e-44
UXS1	3.81808e-48	0.507345	0.173	0.018	7.91258e-44
RFX8	4.18235e-48	-1.83843	0.128	0.398	8.66749e-44
EXOSC5	4.64941e-48	0.551332	0.176	0.02	9.63544e-44
SGK1	6.91648e-48	-1.84522	0.039	0.307	1.43337e-43
DYNLT1	7.12152e-48	0.513463	0.179	0.02	1.47586e-43
CORO2A	9.93643e-48	0.553136	0.11	0	2.05923e-43
GID8	1.14134e-47	0.514448	0.354	0.097	2.36532e-43
FOSL2	1.14967e-47	-1.37551	0.468	0.597	2.38257e-43
MED21	1.19214e-47	0.465986	0.32	0.079	2.47058e-43
TMEM216	1.28983e-47	0.529772	0.146	0.01	2.67304e-43
FABP5	1.29674e-47	0.579244	0.218	0.036	2.68737e-43
NUBP2	1.33435e-47	0.530181	0.254	0.051	2.7653e-43
GABPB1-IT1	1.79505e-47	-1.63235	0.307	0.52	3.72007e-43
DNAJC15	1.83477e-47	0.552754	0.192	0.026	3.80238e-43
TNFRSF1A	1.87345e-47	0.521533	0.247	0.047	3.88255e-43
RFXANK	1.9336e-47	0.606698	0.284	0.066	4.00719e-43
AIMP1	1.9388e-47	0.368132	0.525	0.183	4.01796e-43
CD47	2.06815e-47	0.415545	0.505	0.172	4.28603e-43
MRPS17	2.12942e-47	0.47765	0.19	0.024	4.41301e-43
RAB5B	2.35761e-47	0.575296	0.165	0.016	4.8859e-43
MSRA	2.72035e-47	0.543361	0.242	0.046	5.63766e-43
WDR18	2.7497e-47	0.467683	0.238	0.044	5.69847e-43
CISD2	2.75466e-47	0.568872	0.172	0.019	5.70875e-43
HDAC9	2.81132e-47	-1.63826	0.001	0.252	5.82618e-43
NT5M	3.07105e-47	0.457958	0.16	0.014	6.36445e-43
SMARCB1	3.44489e-47	0.493249	0.231	0.041	7.13919e-43
ANTKMT	3.54477e-47	0.639852	0.251	0.053	7.34618e-43
AMD1	3.6063e-47	-0.83617	0.814	0.719	7.4737e-43
XRN2	3.85025e-47	0.398668	0.455	0.149	7.97927e-43
PDK1	4.14796e-47	0.445148	0.328	0.083	8.59623e-43
PNPLA4	4.16719e-47	0.419447	0.108	0	8.63608e-43
SMIM27	4.39916e-47	0.567606	0.17	0.018	9.11682e-43
CPXM1	4.4784e-47	0.450935	0.176	0.019	9.28104e-43
RNPS1	4.78992e-47	0.384977	0.642	0.245	9.92664e-43
SRI	5.86555e-47	0.419359	0.466	0.156	1.21558e-42
FOPNL	6.17106e-47	0.536896	0.175	0.02	1.27889e-42
SLC2A5	6.52817e-47	0.467001	0.227	0.039	1.3529e-42
SNHG10	6.80734e-47	0.531454	0.209	0.032	1.41075e-42
PLSCR1	7.21339e-47	0.561049	0.167	0.017	1.4949e-42
UROD	7.51659e-47	0.465126	0.208	0.032	1.55774e-42
ISOC2	7.57444e-47	0.582003	0.199	0.029	1.56973e-42
DGCR6L	7.7047e-47	0.650866	0.258	0.056	1.59672e-42
CIAO2A	8.41171e-47	0.491961	0.157	0.014	1.74324e-42
NOL12	8.73079e-47	0.513522	0.195	0.027	1.80937e-42
GET3	8.91386e-47	0.465863	0.237	0.043	1.84731e-42
C22orf39	9.90771e-47	0.481133	0.281	0.064	2.05327e-42
ITPA	1.16464e-46	0.519354	0.271	0.061	2.41361e-42
DDX39A	1.18622e-46	-1.6469	0.322	0.526	2.45832e-42
TWISTNB	1.70604e-46	0.364566	0.468	0.152	3.5356e-42
PPM1G	1.71814e-46	0.479467	0.325	0.085	3.56066e-42
TMEM60	1.74586e-46	0.476387	0.107	0	3.61812e-42
DDIT3	1.79253e-46	-1.02182	0.72	0.684	3.71484e-42
TIMM17B	1.99072e-46	0.615943	0.229	0.043	4.12556e-42
AL627171.2	2.18108e-46	-1.88848	0.081	0.35	4.52006e-42
CCDC144A	2.21881e-46	-1.92711	0.042	0.303	4.59827e-42
UTP18	2.22225e-46	0.512868	0.248	0.049	4.6054e-42
NDUFA3	2.24111e-46	0.487923	0.554	0.206	4.64448e-42
SYNCRIP	2.27997e-46	0.405944	0.596	0.222	4.725e-42
CCNC	2.41422e-46	0.450697	0.26	0.054	5.00324e-42
RWDD4	2.4654e-46	0.461935	0.17	0.018	5.1093e-42
RNF217	2.53175e-46	0.589635	0.141	0.009	5.24679e-42
DHRS11	2.69126e-46	0.491187	0.15	0.012	5.57737e-42
MIER1	2.76246e-46	0.458543	0.502	0.176	5.72493e-42
C3AR1	2.77991e-46	0.55328	0.156	0.013	5.76109e-42
CHRAC1	2.84615e-46	0.546106	0.219	0.038	5.89836e-42
STT3B	2.95347e-46	0.346672	0.457	0.149	6.12078e-42
RPL26L1	3.74186e-46	0.499189	0.202	0.031	7.75464e-42
SHMT2	3.80738e-46	0.589034	0.229	0.043	7.89041e-42
SMIM7	4.78884e-46	0.464811	0.302	0.075	9.92438e-42
BTG3	5.0293e-46	0.570475	0.284	0.066	1.04227e-41
ZKSCAN1	5.54991e-46	0.41965	0.273	0.058	1.15016e-41
DPH5	5.76166e-46	0.468259	0.15	0.012	1.19405e-41
RBM8A	5.98611e-46	0.418442	0.662	0.266	1.24056e-41
NDUFAF2	6.22853e-46	0.461422	0.141	0.01	1.2908e-41
TP53TG1	6.44462e-46	0.63015	0.149	0.012	1.33558e-41
ITGB1BP1	7.30125e-46	0.495818	0.216	0.036	1.51311e-41
ZBTB16	7.30687e-46	0.509229	0.105	0	1.51428e-41
KRT18	7.30687e-46	0.425469	0.105	0	1.51428e-41
ING3	7.42874e-46	0.498611	0.268	0.058	1.53953e-41
MEIS1	8.16468e-46	-1.7582	0.117	0.381	1.69205e-41
SYF2	8.25062e-46	0.436941	0.681	0.276	1.70986e-41
RNF167	9.79164e-46	0.64771	0.203	0.033	2.02922e-41
CD83	1.13024e-45	-1.71828	0.199	0.444	2.3423e-41
NUDT16L1	1.25031e-45	0.463977	0.221	0.038	2.59114e-41
SDHAF2	1.29719e-45	0.534715	0.193	0.028	2.6883e-41
ERGIC1	1.39397e-45	0.485621	0.222	0.04	2.88885e-41
GLTP	1.53081e-45	0.500616	0.225	0.04	3.17245e-41
RGS19	1.56262e-45	0.616291	0.225	0.043	3.23838e-41
ELF1	1.66525e-45	0.585043	0.908	0.427	3.45107e-41
NT5C3A	1.7928e-45	0.472442	0.193	0.027	3.7154e-41
H2AFV	2.11498e-45	0.476349	0.799	0.336	4.38309e-41
RPS11	2.30312e-45	0.585535	0.993	0.589	4.77299e-41
TCAIM	2.42009e-45	0.504764	0.146	0.011	5.01538e-41
BPI	3.05498e-45	1.13842	0.104	0	6.33115e-41
CENPW	3.22696e-45	0.51795	0.137	0.009	6.68755e-41
SVBP	3.42788e-45	0.604077	0.238	0.048	7.10393e-41
UBQLN1	3.50845e-45	0.397608	0.589	0.224	7.27091e-41
YY1	3.55314e-45	0.407889	0.631	0.247	7.36352e-41
TOP1	4.26569e-45	0.342504	0.541	0.19	8.84022e-41
SRPRB	4.30095e-45	0.451878	0.192	0.027	8.9133e-41
KPNA3	4.60724e-45	0.409151	0.284	0.065	9.54805e-41
NUTF2	4.74871e-45	0.476391	0.382	0.118	9.84124e-41
RFWD3	5.38555e-45	0.534786	0.172	0.02	1.1161e-40
VTA1	5.70497e-45	0.501568	0.175	0.021	1.1823e-40
TBXAS1	6.2171e-45	0.465569	0.201	0.031	1.28843e-40
SPART	6.92827e-45	0.336945	0.333	0.087	1.43582e-40
IP6K2	7.98637e-45	0.29849	0.486	0.162	1.6551e-40
CSNK2A2	9.01838e-45	0.44414	0.209	0.035	1.86897e-40
NDUFS7	1.09146e-44	0.345422	0.535	0.191	2.26194e-40
PLP2	1.17033e-44	0.503595	0.506	0.187	2.42538e-40
DYSF	1.27598e-44	0.486226	0.102	0	2.64435e-40
STRADB	1.27598e-44	0.385823	0.102	0	2.64435e-40
C3orf80	1.27598e-44	0.460675	0.102	0	2.64435e-40
MDFI	1.27598e-44	0.380629	0.102	0	2.64435e-40
AC097637.3	1.27598e-44	0.495116	0.102	0	2.64435e-40
DSTN	1.32407e-44	0.432074	0.411	0.131	2.74399e-40
ACAT1	1.45293e-44	0.496517	0.196	0.03	3.01106e-40
DNAJB6	1.59429e-44	0.487416	0.882	0.399	3.304e-40
MTCH2	1.71734e-44	0.506945	0.203	0.033	3.55902e-40
BZW2	1.80004e-44	0.404348	0.476	0.168	3.7304e-40
SBNO1	1.83105e-44	0.362846	0.46	0.154	3.79468e-40
CDC42SE2	1.99159e-44	0.372289	0.431	0.14	4.12737e-40
CALM2	2.58409e-44	0.388187	0.586	0.222	5.35527e-40
UBE2E1	2.75391e-44	0.433802	0.358	0.103	5.70721e-40
GALK1	2.75885e-44	0.486179	0.19	0.028	5.71743e-40
PLAA	2.78967e-44	0.482303	0.261	0.058	5.78131e-40
MRPL34	2.80601e-44	0.525721	0.205	0.034	5.81518e-40
DRG1	2.92563e-44	0.480951	0.179	0.024	6.06308e-40
CNPY3	3.51146e-44	0.431098	0.53	0.196	7.27716e-40
TSG101	3.64055e-44	0.510981	0.219	0.039	7.54467e-40
USP12	3.82989e-44	0.489768	0.404	0.132	7.93706e-40
STOM	4.10184e-44	0.563926	0.137	0.01	8.50066e-40
NDUFA9	4.12951e-44	0.531799	0.208	0.035	8.558e-40
CCNDBP1	4.33756e-44	0.449776	0.25	0.053	8.98917e-40
CLN5	5.08193e-44	0.507703	0.212	0.037	1.05318e-39
ZDHHC4	5.09174e-44	0.461631	0.16	0.017	1.05521e-39
BCKDHB	5.32402e-44	0.407059	0.101	0	1.10335e-39
CHD3	6.60781e-44	-1.7269	0.043	0.297	1.3694e-39
EIF4E2	7.7531e-44	0.466152	0.238	0.048	1.60675e-39
CDC42SE1	7.95202e-44	-1.65945	0.228	0.458	1.64798e-39
TECR	8.32412e-44	0.374845	0.479	0.166	1.72509e-39
IMPA2	8.8996e-44	0.5174	0.172	0.022	1.84435e-39
MYO15B	9.22769e-44	-1.50509	0.369	0.549	1.91235e-39
UTP11	1.24964e-43	0.453064	0.253	0.055	2.58975e-39
ALKBH5	1.25792e-43	0.564024	0.296	0.077	2.60691e-39
HSPA4	1.30526e-43	0.419272	0.238	0.047	2.70503e-39
C12orf29	1.35873e-43	0.508109	0.159	0.017	2.81582e-39
LCP1	1.36307e-43	-1.08673	0.631	0.635	2.82483e-39
RSBN1	1.40567e-43	0.455736	0.33	0.091	2.91311e-39
DANCR	1.6234e-43	0.466949	0.183	0.026	3.36433e-39
TNFAIP3	1.66281e-43	-1.63299	0.222	0.457	3.446e-39
COA5	1.87896e-43	0.466137	0.192	0.029	3.89397e-39
NIP7	1.94702e-43	0.476594	0.203	0.033	4.035e-39
PRPF6	2.0774e-43	0.520969	0.255	0.057	4.3052e-39
CTSC	2.16921e-43	0.3862	0.472	0.165	4.49548e-39
KCNK5	2.2192e-43	0.456135	0.1	0	4.59906e-39
LYRM1	2.28209e-43	0.393432	0.229	0.043	4.72941e-39
TOR1A	2.47238e-43	0.480872	0.18	0.025	5.12375e-39
CUTC	2.47468e-43	0.488846	0.154	0.016	5.12852e-39
PLPP5	2.61213e-43	0.412273	0.199	0.032	5.41337e-39
EIF2D	2.87279e-43	0.51263	0.205	0.035	5.95357e-39
AFF3	3.25845e-43	-1.66436	0.009	0.245	6.7528e-39
LASP1	3.60156e-43	0.567616	0.281	0.07	7.46387e-39
RMND5A	4.26602e-43	0.433885	0.27	0.063	8.8409e-39
PCIF1	4.36606e-43	0.42443	0.3	0.077	9.04821e-39
MDM4	4.66681e-43	-1.41899	0.442	0.568	9.6715e-39
DYNC2LI1	5.05618e-43	0.423141	0.136	0.01	1.04784e-38
SF3A3	5.73313e-43	0.480326	0.232	0.046	1.18813e-38
UBE2A	5.97188e-43	0.404345	0.397	0.127	1.23761e-38
ZNF12	5.99164e-43	0.504197	0.212	0.038	1.24171e-38
UBALD2	6.11403e-43	0.449363	0.834	0.365	1.26707e-38
TMX1	6.16767e-43	0.457889	0.172	0.022	1.27819e-38
GNB2	6.45024e-43	0.551875	0.413	0.142	1.33675e-38
NUDT18	6.5466e-43	0.556284	0.167	0.021	1.35672e-38
RCN1	6.67834e-43	0.414566	0.193	0.03	1.38402e-38
KPNB1	6.97434e-43	0.354692	0.469	0.161	1.44536e-38
ARHGAP45	7.18889e-43	-1.59793	0.253	0.474	1.48983e-38
RAB37	7.43265e-43	0.397439	0.463	0.162	1.54034e-38
SF3B4	8.20899e-43	0.540075	0.235	0.049	1.70123e-38
SPPL3	9.21553e-43	0.399806	0.26	0.058	1.90983e-38
ADAM15	9.81433e-43	0.403402	0.352	0.102	2.03392e-38
NQO2	1.01065e-42	0.451418	0.231	0.045	2.09447e-38
POFUT2	1.05395e-42	0.528712	0.179	0.025	2.1842e-38
TMED1	1.08755e-42	0.376688	0.193	0.03	2.25384e-38
COMMD4	1.09869e-42	0.538757	0.238	0.051	2.27692e-38
FGFR1	1.11277e-42	0.471336	0.149	0.014	2.30611e-38
HAUS2	1.55221e-42	0.470887	0.185	0.027	3.21681e-38
RAD23B	1.6827e-42	0.433723	0.322	0.088	3.48722e-38
MRPL16	1.69569e-42	0.493918	0.179	0.026	3.51415e-38
PTPRC	1.86904e-42	-1.21761	0.556	0.614	3.8734e-38
PTPN11	1.87839e-42	0.472018	0.201	0.034	3.89278e-38
DCXR	2.04692e-42	0.499169	0.4	0.135	4.24205e-38
MTMR10	2.10641e-42	0.49191	0.253	0.056	4.36533e-38
FBXO45	2.16668e-42	0.390551	0.17	0.021	4.49022e-38
ZMAT2	2.18538e-42	0.551244	0.251	0.057	4.52897e-38
TRIQK	2.4522e-42	0.489245	0.156	0.017	5.08194e-38
MRPL9	3.24319e-42	0.45596	0.245	0.054	6.72119e-38
ZNF273	3.47832e-42	0.472136	0.166	0.02	7.20847e-38
B4GALT5	3.54442e-42	0.538337	0.182	0.027	7.34547e-38
DAZAP1	4.13363e-42	0.348718	0.446	0.154	8.56653e-38
ELL2	4.43975e-42	0.570965	0.201	0.035	9.20093e-38
UBE2N	4.79325e-42	0.411003	0.534	0.204	9.93354e-38
CHCHD3	4.8815e-42	0.441494	0.214	0.04	1.01164e-37
TM2D1	4.8974e-42	0.451628	0.229	0.046	1.01494e-37
LAMP1	4.91109e-42	0.468344	0.447	0.161	1.01778e-37
HDHD2	5.17257e-42	0.441107	0.156	0.017	1.07196e-37
PLAGL1	6.32797e-42	0.338638	0.237	0.048	1.31141e-37
PTPN12	6.8167e-42	0.459064	0.336	0.098	1.41269e-37
DHFR	6.85213e-42	0.534142	0.139	0.012	1.42004e-37
TNFRSF12A	6.92853e-42	0.4794	0.26	0.061	1.43587e-37
USP3	7.17843e-42	-1.65202	0.188	0.421	1.48766e-37
BORCS7	7.25001e-42	0.42738	0.255	0.058	1.50249e-37
MAPKAPK5-AS1	7.30707e-42	0.449596	0.222	0.043	1.51432e-37
KRAS	7.34701e-42	0.364415	0.453	0.156	1.52259e-37
CISD3	7.78806e-42	0.466562	0.159	0.019	1.614e-37
COPS8	7.97139e-42	0.436139	0.227	0.046	1.65199e-37
ZBTB34	8.10062e-42	0.44877	0.193	0.031	1.67877e-37
PET100	8.88884e-42	0.426409	0.57	0.226	1.84212e-37
PMPCA	9.34491e-42	0.367484	0.421	0.138	1.93664e-37
IDI1	9.87129e-42	0.398699	0.492	0.181	2.04573e-37
LYSMD2	1.027e-41	0.462814	0.208	0.038	2.12836e-37
COPS4	1.02965e-41	0.466179	0.264	0.063	2.13385e-37
NAA10	1.1482e-41	0.37719	0.391	0.127	2.37953e-37
CPNE3	1.21687e-41	0.59462	0.212	0.04	2.52184e-37
TMEM126B	1.26713e-41	0.45572	0.159	0.019	2.626e-37
PSMG3	1.28098e-41	0.508442	0.221	0.043	2.65471e-37
COPS2	1.31467e-41	0.315772	0.54	0.205	2.72453e-37
SUMF2	1.45706e-41	0.402549	0.505	0.187	3.01961e-37
TPGS2	1.5503e-41	0.465195	0.19	0.031	3.21283e-37
MS4A6A	1.72876e-41	-1.59608	0.036	0.276	3.58269e-37
GTF2F2	1.79426e-41	0.478249	0.169	0.023	3.71843e-37
SMU1	1.81996e-41	0.49348	0.313	0.086	3.77169e-37
METTL23	2.10161e-41	0.520745	0.157	0.019	4.35537e-37
HDAC1	2.12976e-41	0.523348	0.208	0.039	4.41371e-37
CREB3L2	2.1745e-41	0.430654	0.309	0.086	4.50643e-37
SUZ12	2.30972e-41	0.411488	0.468	0.166	4.78666e-37
MARCH7	2.56412e-41	0.434815	0.215	0.04	5.31388e-37
NKAPD1	2.60635e-41	0.436822	0.185	0.029	5.4014e-37
BRD2	2.7196e-41	-1.03835	0.7	0.657	5.6361e-37
ZNF92	2.79403e-41	0.454226	0.17	0.023	5.79034e-37
SSBP2	2.84033e-41	0.393964	0.172	0.024	5.88631e-37
KLHL28	3.14318e-41	0.472631	0.235	0.05	6.51392e-37
BRMS1	3.5604e-41	0.375679	0.3	0.079	7.37857e-37
FAM49B	3.70625e-41	0.361776	0.436	0.151	7.68083e-37
ARL5A	3.98889e-41	0.488533	0.218	0.043	8.26657e-37
COPRS	3.99002e-41	0.446117	0.198	0.034	8.26893e-37
MMAB	4.05838e-41	0.476176	0.153	0.017	8.41059e-37
COMMD1	4.65206e-41	0.537601	0.157	0.019	9.64092e-37
PPP2R2D	4.65344e-41	0.326099	0.317	0.088	9.64378e-37
H2AFY	4.68621e-41	-0.732951	0.837	0.72	9.7117e-37
ELOVL1	4.93786e-41	0.47081	0.15	0.016	1.02332e-36
LEPROT	5.14691e-41	0.425061	0.392	0.129	1.06665e-36
ING4	5.3679e-41	0.423222	0.143	0.014	1.11244e-36
SERINC3	5.50117e-41	0.442467	0.32	0.091	1.14006e-36
SNRNP25	5.74612e-41	0.510324	0.198	0.035	1.19083e-36
SLC39A6	8.2401e-41	0.49917	0.18	0.028	1.70768e-36
KDSR	8.69056e-41	0.454776	0.149	0.016	1.80103e-36
MRPL1	9.31485e-41	0.459331	0.188	0.031	1.93041e-36
KANSL1-AS1	9.32511e-41	0.516816	0.143	0.014	1.93254e-36
ZNF430	1.05077e-40	0.417148	0.205	0.038	2.17761e-36
CNOT11	1.05673e-40	0.489298	0.17	0.024	2.18996e-36
POU2F2	1.06965e-40	-1.68344	0.022	0.251	2.21674e-36
TSPAN4	1.07694e-40	0.510889	0.153	0.017	2.23185e-36
SLC66A2	1.11279e-40	0.434772	0.297	0.079	2.30615e-36
PTS	1.16375e-40	0.478089	0.254	0.061	2.41176e-36
TSFM	1.18128e-40	0.381889	0.141	0.013	2.44808e-36
BAZ2B	1.19891e-40	-1.65085	0.211	0.437	2.48461e-36
TNPO1	1.23836e-40	0.437206	0.245	0.054	2.56637e-36
DDA1	1.38404e-40	0.65443	0.253	0.062	2.86829e-36
CKS1B	1.42617e-40	0.471729	0.143	0.014	2.95559e-36
PPP1CB	1.65059e-40	0.390248	0.566	0.223	3.42069e-36
PIAS2	1.65736e-40	0.459947	0.165	0.021	3.43471e-36
RBM15B	1.72323e-40	0.417261	0.196	0.034	3.57122e-36
MRPL27	1.79138e-40	0.492533	0.192	0.033	3.71246e-36
FAM160B1	1.79951e-40	0.470517	0.306	0.084	3.72931e-36
HNRNPR	2.0241e-40	0.317596	0.417	0.141	4.19474e-36
TUBB4B	2.18701e-40	0.455605	0.825	0.369	4.53235e-36
MSN	2.27809e-40	0.39023	0.665	0.281	4.72111e-36
HIST1H4C	2.48629e-40	0.36597	0.329	0.095	5.15259e-36
MRPS7	2.65881e-40	0.394159	0.208	0.039	5.51012e-36
FMNL1	2.67963e-40	-1.21423	0.564	0.62	5.55326e-36
UBXN11	2.96783e-40	-1.80025	0.056	0.293	6.15053e-36
PPP2R3C	3.0301e-40	0.425791	0.235	0.051	6.27958e-36
PDIA3	3.22703e-40	0.419949	0.724	0.306	6.6877e-36
ADIPOR1	3.35383e-40	0.450187	0.286	0.075	6.95047e-36
CLN6	3.45123e-40	0.439395	0.186	0.031	7.15233e-36
MAIP1	4.06549e-40	0.437652	0.165	0.022	8.42532e-36
STK26	4.30052e-40	0.448444	0.358	0.112	8.91239e-36
AZU1	4.52521e-40	0.404815	0.997	0.826	9.37804e-36
ZCCHC10	4.72236e-40	0.473935	0.224	0.047	9.78662e-36
ABHD17B	4.72997e-40	0.503221	0.267	0.067	9.8024e-36
SUGT1	5.15298e-40	0.390588	0.248	0.057	1.0679e-35
MAFK	5.16441e-40	0.4802	0.247	0.056	1.07027e-35
CTNNBIP1	5.54735e-40	0.412155	0.157	0.02	1.14963e-35
DENND10	5.62838e-40	0.447011	0.384	0.124	1.16643e-35
TARS	5.76296e-40	0.394973	0.264	0.065	1.19432e-35
SMARCC1	5.88784e-40	0.415462	0.33	0.098	1.2202e-35
CCDC25	6.2434e-40	0.444596	0.128	0.01	1.29388e-35
OIP5-AS1	6.30208e-40	0.313452	0.418	0.143	1.30604e-35
CNST	7.35649e-40	0.370047	0.317	0.091	1.52456e-35
SAMM50	7.46865e-40	0.371568	0.206	0.039	1.5478e-35
DIS3	7.5018e-40	0.386597	0.309	0.085	1.55467e-35
WDR82	9.95986e-40	0.391812	0.307	0.086	2.06408e-35
PSMB9	1.00338e-39	0.457581	0.177	0.028	2.0794e-35
ZNF254	1.12624e-39	0.443373	0.19	0.032	2.33403e-35
ISCU	1.1454e-39	0.297184	0.351	0.106	2.37372e-35
C11orf68	1.14711e-39	0.474957	0.128	0.01	2.37728e-35
GRSF1	1.17063e-39	0.459189	0.225	0.048	2.42601e-35
HDAC2	1.20555e-39	0.338511	0.39	0.127	2.49838e-35
RBM42	1.21794e-39	0.542071	0.242	0.058	2.52406e-35
PPID	1.33731e-39	0.456701	0.179	0.028	2.77144e-35
PPP1R2	1.33998e-39	0.338761	0.587	0.233	2.77698e-35
MALSU1	1.4727e-39	0.456492	0.136	0.012	3.05202e-35
PRPS2	1.47833e-39	0.408327	0.115	0.006	3.0637e-35
TFPT	1.58727e-39	0.432181	0.199	0.036	3.28945e-35
TRAPPC3	1.58789e-39	0.437871	0.183	0.03	3.29074e-35
POLR3GL	1.63645e-39	0.509245	0.19	0.034	3.39137e-35
UQCC3	1.95244e-39	0.453011	0.218	0.046	4.04623e-35
EXOSC4	2.45103e-39	0.481614	0.147	0.017	5.07952e-35
CD82	2.53354e-39	0.336442	0.395	0.128	5.25051e-35
ITGA7	2.6668e-39	-1.58145	0.001	0.214	5.52668e-35
CACYBP	2.98937e-39	0.398065	0.423	0.149	6.19517e-35
TGFBRAP1	3.03087e-39	0.40245	0.165	0.023	6.28117e-35
MRPL36	3.06522e-39	0.480916	0.149	0.018	6.35237e-35
TXNDC9	3.08723e-39	0.400344	0.126	0.01	6.39798e-35
GMDS	3.70826e-39	0.433229	0.153	0.019	7.68501e-35
RRP7A	3.74987e-39	0.393279	0.253	0.06	7.77124e-35
CHIC2	4.06308e-39	0.519452	0.215	0.045	8.42033e-35
EGLN2	4.10356e-39	0.405184	0.238	0.053	8.50422e-35
HACD4	4.20138e-39	0.474556	0.253	0.062	8.70695e-35
CDT1	4.52901e-39	0.464542	0.133	0.012	9.38592e-35
WHAMM	4.68997e-39	-1.52879	0.242	0.456	9.7195e-35
AC025159.1	4.70665e-39	0.459783	0.287	0.078	9.75406e-35
COX20	4.88954e-39	0.397735	0.348	0.108	1.01331e-34
MAP2K2	5.46695e-39	0.300591	0.475	0.176	1.13297e-34
BHLHE40	5.84966e-39	0.277619	0.541	0.206	1.21228e-34
RGS18	5.91183e-39	0.530974	0.238	0.055	1.22517e-34
MRPS22	6.05869e-39	0.406134	0.16	0.021	1.2556e-34
GSTZ1	6.19055e-39	0.460381	0.172	0.027	1.28293e-34
ZNF574	6.26404e-39	0.444506	0.14	0.014	1.29816e-34
SESTD1	6.5452e-39	0.322702	0.156	0.019	1.35643e-34
SYS1	6.71542e-39	0.422888	0.209	0.042	1.3917e-34
SLC36A4	6.78197e-39	0.364229	0.289	0.077	1.40549e-34
CHCHD7	6.7922e-39	0.503344	0.193	0.035	1.40762e-34
ABRAXAS1	6.90908e-39	0.436412	0.121	0.009	1.43184e-34
EIF3B	7.02707e-39	0.278494	0.502	0.185	1.45629e-34
SNHG21	7.82836e-39	0.432268	0.156	0.02	1.62235e-34
PPCS	7.87889e-39	0.411935	0.215	0.044	1.63282e-34
PHTF1	8.08707e-39	0.421257	0.274	0.071	1.67597e-34
H1F0	8.42647e-39	0.584892	0.144	0.016	1.7463e-34
MAPK12	9.84398e-39	0.443259	0.144	0.016	2.04007e-34
ARHGAP15	1.00375e-38	0.415432	0.276	0.073	2.08018e-34
SERTAD1	1.04227e-38	0.367255	0.469	0.175	2.16e-34
GRK2	1.12307e-38	-1.06185	0.687	0.671	2.32745e-34
CEBPA	1.19746e-38	0.361935	0.367	0.117	2.48161e-34
IKBIP	1.21282e-38	0.446433	0.133	0.012	2.51345e-34
BID	1.2454e-38	0.405558	0.266	0.07	2.58097e-34
NUFIP1	1.27521e-38	0.402863	0.128	0.011	2.64274e-34
EEF1D	1.27907e-38	0.591782	0.948	0.492	2.65075e-34
RTCA	1.36461e-38	0.434119	0.231	0.052	2.82801e-34
AC018926.2	1.39168e-38	0.61883	0.18	0.031	2.88411e-34
TYMS	1.76215e-38	0.545204	0.127	0.011	3.65188e-34
MRPL2	1.79386e-38	0.485457	0.157	0.021	3.71759e-34
TCEA2	1.96739e-38	0.505532	0.196	0.038	4.07721e-34
H2AFJ	2.10994e-38	-1.64924	0.199	0.414	4.37263e-34
SREK1IP1	2.2256e-38	0.501216	0.241	0.057	4.61234e-34
MRPS11	2.30658e-38	0.488608	0.172	0.027	4.78015e-34
FHIT	2.39863e-38	0.42518	0.136	0.013	4.97092e-34
PTOV1	2.40887e-38	0.405544	0.304	0.087	4.99213e-34
MRPS2	2.46554e-38	0.297437	0.231	0.05	5.10959e-34
MED10	2.47955e-38	0.428516	0.237	0.055	5.13862e-34
PRPS1	2.70821e-38	0.489667	0.179	0.031	5.6125e-34
JADE1	2.74526e-38	0.40897	0.216	0.045	5.68927e-34
ENY2	2.78027e-38	0.345704	0.609	0.253	5.76182e-34
MFNG	2.78426e-38	0.456199	0.214	0.046	5.7701e-34
SNRK	2.82259e-38	0.409149	0.283	0.076	5.84954e-34
CRACR2B	3.33366e-38	0.458838	0.154	0.02	6.90868e-34
NIPSNAP2	3.45937e-38	0.406136	0.232	0.053	7.1692e-34
THUMPD3-AS1	3.82456e-38	0.36587	0.524	0.206	7.92601e-34
ARMC8	4.24359e-38	0.390156	0.299	0.085	8.79441e-34
RBM33	4.51998e-38	0.290865	0.392	0.131	9.36722e-34
IMPACT	4.55567e-38	0.413945	0.165	0.024	9.44117e-34
UBE2D2	4.99982e-38	0.267944	0.4	0.137	1.03616e-33
MED1	5.59662e-38	0.439304	0.179	0.03	1.15984e-33
FBXL3	5.76555e-38	0.378064	0.378	0.126	1.19485e-33
AL360012.1	6.00105e-38	-1.69809	0.02	0.238	1.24366e-33
WASHC3	6.00223e-38	0.445659	0.156	0.021	1.2439e-33
CAPRIN1	6.38878e-38	0.276179	0.473	0.173	1.32401e-33
AP5B1	6.5629e-38	0.375433	0.407	0.136	1.3601e-33
TRG-AS1	6.64169e-38	0.381418	0.159	0.021	1.37642e-33
GPBP1	6.74663e-38	-1.35112	0.457	0.561	1.39817e-33
PIK3CB	6.85387e-38	0.392076	0.228	0.051	1.4204e-33
GGNBP2	6.87561e-38	0.326668	0.732	0.308	1.4249e-33
POLR2K	7.37725e-38	0.463853	0.248	0.062	1.52886e-33
SF3A2	8.57218e-38	0.42709	0.302	0.088	1.7765e-33
VEZF1	8.92352e-38	0.424536	0.26	0.065	1.84931e-33
HINT3	8.95203e-38	0.415032	0.131	0.012	1.85522e-33
CHMP3	9.36617e-38	0.529002	0.24	0.06	1.94105e-33
REX1BD	9.38304e-38	0.384495	0.544	0.22	1.94454e-33
RWDD3	9.54898e-38	0.453971	0.12	0.009	1.97893e-33
SRRM2	9.87903e-38	-0.981603	0.707	0.672	2.04733e-33
SERPINB6	9.8993e-38	0.364884	0.414	0.147	2.05153e-33
ZFAND2B	1.07222e-37	0.457258	0.248	0.061	2.22207e-33
TMED4	1.14598e-37	0.440929	0.33	0.106	2.37492e-33
PDHB	1.1471e-37	0.429373	0.179	0.031	2.37725e-33
KPNA6	1.17588e-37	0.400598	0.293	0.082	2.4369e-33
ENTPD7	1.23244e-37	0.466905	0.139	0.015	2.55412e-33
ZNF426	1.30954e-37	0.327283	0.143	0.016	2.71388e-33
SH3BGRL3	1.81219e-37	0.54278	0.922	0.394	3.75558e-33
BOLA3	1.97177e-37	0.408173	0.134	0.014	4.08629e-33
PSMC2	2.05712e-37	0.386221	0.215	0.046	4.26318e-33
UBE2J1	2.14459e-37	0.346453	0.674	0.283	4.44445e-33
PRKAR2A	2.26776e-37	0.486619	0.276	0.076	4.6997e-33
C1orf122	2.40856e-37	0.485763	0.218	0.049	4.99149e-33
ORMDL2	2.4175e-37	0.405029	0.137	0.015	5.01002e-33
DCUN1D5	2.83744e-37	0.421474	0.215	0.047	5.88032e-33
YDJC	3.3563e-37	0.361104	0.199	0.04	6.95559e-33
TEN1	3.43593e-37	0.370826	0.296	0.085	7.12062e-33
ZNF431	3.63607e-37	0.417886	0.28	0.077	7.5354e-33
CRTAP	3.85827e-37	0.504869	0.3	0.092	7.99587e-33
AGA	4.20035e-37	0.422345	0.127	0.012	8.7048e-33
BZW1	4.52732e-37	0.367126	0.733	0.323	9.38243e-33
DDX54	4.52738e-37	0.326353	0.274	0.073	9.38255e-33
STAU1	4.56872e-37	0.470034	0.205	0.042	9.46822e-33
ZNF44	5.02177e-37	0.396815	0.231	0.054	1.04071e-32
ANP32E	5.09662e-37	0.45936	0.273	0.076	1.05622e-32
NPM3	5.13644e-37	0.473995	0.157	0.024	1.06448e-32
PSMD3	5.58468e-37	0.417246	0.205	0.042	1.15737e-32
EPRS	5.78852e-37	0.414863	0.186	0.034	1.19961e-32
YWHAG	5.83656e-37	0.355563	0.264	0.07	1.20957e-32
RBMX2	7.07812e-37	0.450237	0.153	0.021	1.46687e-32
SPTSSA	7.20864e-37	0.448124	0.147	0.019	1.49392e-32
HSD17B8	7.28571e-37	0.405847	0.11	0.006	1.50989e-32
SPATA2L	7.88858e-37	0.425855	0.193	0.036	1.63483e-32
CMTM3	8.01622e-37	0.42955	0.219	0.05	1.66128e-32
ZNF264	8.53219e-37	0.439545	0.12	0.01	1.76821e-32
SDE2	8.65361e-37	0.366448	0.44	0.162	1.79337e-32
TPGS1	8.73075e-37	0.347909	0.28	0.078	1.80936e-32
FUS	8.91973e-37	-0.846404	0.792	0.68	1.84852e-32
APOBR	8.9582e-37	-1.59425	0.013	0.221	1.8565e-32
ZMYM5	9.02055e-37	0.369159	0.299	0.089	1.86942e-32
WDR33	9.32396e-37	0.316801	0.267	0.07	1.9323e-32
ARID3A	9.84544e-37	0.459441	0.245	0.061	2.04037e-32
PRR5	1.1693e-36	0.364971	0.121	0.01	2.42326e-32
ENDOG	1.20132e-36	0.409409	0.127	0.012	2.48962e-32
[truncated: 1,051 more rows]

## Sheet: PAVTLN-ALL-7vsD
gene_sym	p_val	avg_log2FC	pct.1	pct.2	p_val_adj
PARK7	0	1.77964	0.936	0.106	0
DDOST	0	1.73448	0.876	0.071	0
NDUFS5	0	1.71646	0.954	0.123	0
PRDX1	0	1.92858	0.903	0.072	0
TMEM59	0	1.66704	0.958	0.107	0
GADD45A	0	1.67563	0.805	0.048	0
UFC1	0	1.68745	0.948	0.125	0
CREG1	0	1.50563	0.77	0.038	0
SELL	0	1.74685	0.767	0.021	0
PRDX6	0	1.93469	0.962	0.097	0
PTRHD1	0	1.58144	0.836	0.062	0
COX7A2L	0	2.05921	0.96	0.072	0
GYPC	0	2.08009	0.834	0.007	0
MZT2B	0	1.98064	0.992	0.139	0
MZT2A	0	1.67595	0.829	0.053	0
ZEB2	0	-2.95325	0.674	0.976	0
OLA1	0	1.68166	0.834	0.047	0
SUMO1	0	1.69709	0.926	0.085	0
EEF1B2	0	2.25813	1	0.21	0
ITM2C	0	1.63261	0.728	0.025	0
IMPDH2	0	1.97091	0.936	0.064	0
SPCS1	0	1.7223	0.94	0.102	0
MTRNR2L12	0	-3.05414	0.898	0.998	0
CCNL1	0	-2.05001	0.997	0.994	0
NDUFB5	0	1.77698	0.891	0.057	0
CYTL1	0	1.739	0.706	0	0
SPINK2	0	2.26038	0.989	0.108	0
HSD17B11	0	1.76355	0.864	0.047	0
PYURF	0	1.75234	0.784	0.014	0
OSTC	0	1.92471	0.923	0.068	0
NDUFS4	0	1.63754	0.781	0.032	0
BTF3	0	2.37298	0.999	0.173	0
EPB41L4A-AS1	0	1.73295	0.89	0.064	0
VDAC1	0	1.58557	0.766	0.036	0
CAMLG	0	1.63051	0.859	0.059	0
NPM1	0	1.97806	0.994	0.184	0
TMEM14C	0	1.58332	0.755	0.033	0
LSM2	0	1.66846	0.77	0.028	0
COX7A2	0	1.80475	0.957	0.109	0
SNX3	0	1.79764	0.947	0.087	0
ABRACL	0	1.58078	0.77	0.04	0
MDH2	0	1.6106	0.875	0.08	0
UXT	0	1.91658	0.951	0.086	0
IGBP1	0	1.55835	0.779	0.042	0
SH3BGRL	0	1.74163	0.944	0.104	0
BEX3	0	1.74129	0.759	0.009	0
SLC25A5	0	2.01812	0.983	0.143	0
CLU	0	2.17649	0.861	0.029	0
EIF3E	0	2.11859	0.996	0.177	0
LY6E	0	1.79438	0.799	0.036	0
CLTA	0	1.54138	0.861	0.07	0
ISCA1	0	1.59161	0.762	0.026	0
EGFL7	0	2.11562	0.836	0.005	0
SNHG7	0	1.71662	0.944	0.104	0
TALDO1	0	2.0146	0.975	0.112	0
EIF3F	0	1.81157	0.994	0.154	0
NUCB2	0	1.93301	0.955	0.097	0
C1QTNF4	0	1.72469	0.745	0.016	0
PPP1R14B	0	1.8059	0.936	0.09	0
PRDX5	0	1.73693	0.951	0.11	0
NEAT1	0	-1.95338	0.996	0.988	0
MALAT1	0	-2.11803	1	1	0
CTSW	0	2.24705	0.937	0.032	0
LAMTOR1	0	1.77274	0.841	0.036	0
CLNS1A	0	1.67153	0.857	0.057	0
ATP5F1C	0	1.85339	0.912	0.084	0
PPA1	0	1.74763	0.957	0.117	0
NDUFB8	0	1.65071	0.882	0.086	0
MGST1	0	2.53944	0.925	0.008	0
LDHB	0	2.50927	0.994	0.102	0
PEBP1	0	1.74867	0.957	0.115	0
GTF3A	0	1.64332	0.922	0.11	0
EBPL	0	2.26653	0.944	0.033	0
COMMD6	0	1.96228	0.979	0.13	0
DAD1	0	1.59225	0.776	0.045	0
RTRAF	0	2.15564	0.979	0.095	0
NPC2	0	1.64313	0.887	0.087	0
FAM30A	0	2.02792	0.811	0.001	0
NOP10	0	1.55695	0.883	0.081	0
COX5A	0	1.86054	0.968	0.112	0
MPG	0	1.94105	0.929	0.057	0
NPW	0	1.81688	0.717	0.014	0
APRT	0	1.77139	0.983	0.147	0
C1QBP	0	2.09198	0.943	0.07	0
LRRC75A	0	2.09614	0.773	0.024	0
NME1	0	1.67257	0.798	0.052	0
NME2	0	2.34296	0.999	0.144	0
LGALS3BP	0	1.57696	0.664	0.006	0
MYL12B	0	1.72258	0.946	0.123	0
PRSS57	0	2.95615	0.993	0.004	0
PRTN3	0	2.19399	0.685	0.005	0
GNA15	0	2.05131	0.894	0.034	0
SMIM24	0	2.4654	0.962	0.004	0
MYDGF	0	1.6055	0.879	0.09	0
ALKBH7	0	1.6609	0.889	0.074	0
EIF3K	0	1.88231	0.989	0.153	0
COMT	0	1.5892	0.88	0.086	0
RANBP1	0	1.73428	0.843	0.061	0
IGLL1	0	2.15721	0.826	0.014	0
DDT	0	1.68374	0.911	0.102	0
EIF3L	0	1.99528	0.969	0.104	0
TOMM22	0	1.74053	0.904	0.076	0
ST13	0	1.79628	0.955	0.109	0
ATP5PF	0	1.74182	0.932	0.094	0
ATP5PO	0	1.95572	0.96	0.085	0
MT-ND1	0	-1.5247	1	0.999	0
MT-ND2	0	-1.6566	1	0.999	0
MT-CO1	0	-1.95402	1	1	0
MT-CO2	0	-1.92434	1	1	0
MT-ATP6	0	-1.787	1	0.999	0
MT-CO3	0	-1.80771	1	1	0
MT-ND3	0	-2.11443	1	1	0
MT-ND4L	0	-2.24116	0.992	0.991	0
MT-ND4	0	-1.85394	1	1	0
MT-ND5	0	-1.81483	0.999	0.994	0
MLF1	0	1.67613	0.932	0.102	0
SNHG29	0	2.27631	1	0.209	0
TMEM230	7.78929e-308	1.51437	0.795	0.055	1.61425e-303
CASP4	3.36972e-307	1.48485	0.698	0.02	6.98341e-303
IGFBP2	1.0055e-306	1.75678	0.628	0	2.08379e-302
TBCA	3.6795e-306	1.59041	0.922	0.112	7.62539e-302
SUMO2	4.49325e-306	1.78842	0.986	0.165	9.31181e-302
ATP6V1G1	5.77362e-306	1.64301	0.961	0.131	1.19652e-301
PSMA2	1.03566e-305	1.52791	0.9	0.099	2.14631e-301
PHB	1.0312e-304	1.54936	0.76	0.045	2.13707e-300
SMIM26	4.78239e-304	1.53664	0.88	0.093	9.91103e-300
CYTOR	2.03112e-302	1.45661	0.877	0.08	4.20929e-298
SEC11A	4.40321e-302	1.57617	0.898	0.104	9.12521e-298
SYNGR1	5.03034e-301	1.54159	0.879	0.094	1.04249e-296
FOSB	1.86101e-300	-1.67874	0.997	0.977	3.85676e-296
CD81	1.08515e-299	1.52766	0.802	0.061	2.24887e-295
TOMM6	1.10888e-298	1.58817	0.916	0.116	2.29805e-294
NDUFA4	5.48475e-298	1.69876	0.978	0.152	1.13666e-293
OCIAD2	8.1558e-298	1.43133	0.692	0.023	1.69021e-293
SNRPE	3.13483e-297	1.50431	0.809	0.069	6.49661e-293
CALHM6	3.60925e-297	1.44868	0.611	0	7.47982e-293
MT-CYB	3.61585e-297	-1.45312	1	0.996	7.49349e-293
SRM	6.16029e-297	1.57832	0.79	0.061	1.27666e-292
SIVA1	2.48777e-296	1.41335	0.816	0.068	5.15565e-292
NSA2	3.19039e-296	1.53	0.955	0.129	6.61177e-292
ESD	4.60707e-296	1.42023	0.792	0.057	9.5477e-292
TMEM14B	4.2984e-295	1.44683	0.706	0.032	8.908e-291
OST4	7.66327e-295	1.62247	0.951	0.123	1.58814e-290
HNRNPU	8.99365e-295	-1.99155	0.969	0.972	1.86384e-290
PSME1	2.47859e-294	1.58675	0.935	0.128	5.13662e-290
SNRPD1	5.36012e-293	1.49232	0.848	0.082	1.11083e-288
VIM	5.58013e-293	-1.30598	1	0.983	1.15643e-288
MTHFD2L	1.76324e-291	1.39515	0.714	0.032	3.65414e-287
MPC2	1.15011e-290	1.48849	0.879	0.099	2.38349e-286
LEPROTL1	1.28746e-290	1.46043	0.781	0.059	2.66813e-286
SCCPDH	1.43926e-290	1.41374	0.666	0.019	2.98271e-286
THOC7	2.40247e-290	1.46056	0.776	0.06	4.97887e-286
IL18	3.99777e-290	1.35267	0.792	0.056	8.28498e-286
SELENOP	4.63312e-290	1.43087	0.599	0	9.60169e-286
NHP2	5.21472e-290	1.53699	0.77	0.059	1.0807e-285
RABAC1	1.86519e-289	1.5012	0.811	0.073	3.86541e-285
ANAPC16	4.56195e-289	1.42465	0.852	0.09	9.45418e-285
XIST	1.10209e-288	-1.8747	0.985	0.979	2.28397e-284
EMID1	4.96249e-288	1.34302	0.63	0.009	1.02843e-283
LSM3	6.70911e-288	1.4684	0.769	0.058	1.3904e-283
NDUFC2	1.69855e-287	1.50783	0.85	0.091	3.52008e-283
C11orf1	3.15719e-287	1.41083	0.63	0.01	6.54296e-283
CCT7	1.00393e-286	1.48064	0.735	0.048	2.08054e-282
EIF3H	2.35244e-285	1.67414	0.989	0.175	4.87519e-281
SF3B6	3.92805e-285	1.60103	0.967	0.15	8.14049e-281
NME4	5.74193e-285	1.38467	0.733	0.042	1.18996e-280
LSM5	8.87984e-284	1.45073	0.772	0.062	1.84026e-279
CCNG1	2.78494e-283	1.38359	0.721	0.041	5.77152e-279
COX7C	4.34084e-283	1.7307	0.992	0.158	8.99595e-279
SRSF9	2.15091e-282	1.53367	0.955	0.145	4.45754e-278
EIF3I	2.16331e-281	1.46384	0.925	0.126	4.48324e-277
UQCRH	3.64375e-281	1.79041	0.992	0.187	7.5513e-277
NBDY	3.80267e-281	1.37104	0.677	0.028	7.88066e-277
FAM162A	2.46253e-279	1.39573	0.758	0.058	5.10334e-275
ARPC3	2.99167e-279	1.7407	0.989	0.173	6.19994e-275
ANKRD28	3.2624e-279	-1.37572	0.999	0.966	6.761e-275
ATP5PB	4.9601e-278	1.39324	0.845	0.091	1.02793e-273
RSL24D1	2.99307e-277	1.64228	0.981	0.173	6.20283e-273
CKLF	3.32451e-277	1.49515	0.74	0.056	6.88972e-273
CD96	8.67497e-277	1.37426	0.595	0.005	1.7978e-272
DDX5	3.9213e-276	-1.39438	0.999	0.967	8.12649e-272
NACA	7.44041e-276	1.71787	1	0.303	1.54195e-271
STOML2	9.15736e-276	1.36291	0.745	0.055	1.89777e-271
PSMB6	2.71963e-275	1.32191	0.762	0.06	5.63616e-271
LAPTM4A	3.94084e-275	1.44439	0.896	0.118	8.167e-271
NDUFB11	6.73934e-275	1.47969	0.939	0.137	1.39666e-270
SNHG8	1.25469e-274	1.62768	0.985	0.178	2.60023e-270
MTRNR2L8	3.76657e-274	-3.14484	0.468	0.932	7.80584e-270
RPS5	1.29912e-273	1.66941	1	0.321	2.69231e-269
PHB2	4.71543e-273	1.3874	0.905	0.121	9.77226e-269
TMED2	6.47357e-273	1.33165	0.742	0.053	1.34158e-268
ACP1	1.59676e-272	1.28876	0.748	0.055	3.30913e-268
SNRPF	1.70398e-272	1.51471	0.904	0.122	3.53132e-268
TRA2B	8.42469e-272	-2.21357	0.859	0.946	1.74593e-267
PFDN4	2.25682e-271	1.36714	0.703	0.044	4.67703e-267
POMP	8.38609e-271	1.43098	0.841	0.1	1.73793e-266
C19orf53	8.79722e-271	1.36515	0.877	0.111	1.82314e-266
TSTD1	1.1951e-270	1.35391	0.625	0.018	2.47673e-266
COX6C	2.14608e-270	1.53119	0.958	0.145	4.44753e-266
NENF	3.93387e-270	1.40142	0.779	0.072	8.15255e-266
GDI2	1.63732e-269	1.39411	0.912	0.123	3.39317e-265
HNRNPA2B1	4.32885e-269	-1.54069	0.996	0.957	8.97111e-265
JTB	1.95113e-268	1.35432	0.855	0.101	4.04352e-264
SELENOF	2.01989e-268	1.33383	0.712	0.047	4.18602e-264
SF3B5	2.32007e-268	1.37007	0.914	0.126	4.80812e-264
ITM2B	2.87613e-268	1.56653	0.979	0.171	5.96049e-264
ETHE1	1.84962e-266	1.33593	0.639	0.024	3.83316e-262
RAB5C	2.2379e-266	1.35302	0.713	0.047	4.63783e-262
TMEM147	2.56379e-266	1.32347	0.709	0.047	5.31319e-262
JUND	7.25467e-266	-1.09151	1	0.982	1.50346e-261
MDK	7.89285e-265	1.4222	0.57	0.004	1.63571e-260
TMEM123	1.13392e-264	1.2921	0.801	0.078	2.34994e-260
GLRX5	6.17634e-264	1.29817	0.726	0.053	1.27998e-259
TENT5C	2.02557e-263	1.2884	0.669	0.034	4.19778e-259
CCT8	2.20689e-263	1.39835	0.877	0.113	4.57355e-259
AHNAK	3.22637e-263	-2.49659	0.804	0.95	6.68633e-259
DDAH2	4.68031e-263	1.34865	0.805	0.08	9.69948e-259
PLCG2	7.78454e-263	-3.69702	0.295	0.907	1.61327e-258
PSMB7	1.58973e-262	1.30877	0.767	0.07	3.29455e-258
SMS	3.14191e-262	1.3227	0.702	0.047	6.51129e-258
TXN2	5.04005e-262	1.30776	0.72	0.054	1.0445e-257
TXN	1.0432e-261	1.70668	0.992	0.195	2.16194e-257
CCT4	1.12574e-261	1.45076	0.939	0.146	2.33298e-257
APEX1	1.4208e-261	1.39693	0.937	0.139	2.94446e-257
MRPL11	8.05218e-261	1.30387	0.678	0.041	1.66873e-256
GNG5	2.19227e-260	1.43166	0.909	0.137	4.54325e-256
RAB11FIP1	2.82737e-260	-2.11414	0.877	0.947	5.85945e-256
CCT3	5.15869e-259	1.27187	0.735	0.061	1.06909e-254
NEDD8	7.12083e-259	1.41469	0.894	0.129	1.47572e-254
DNPH1	7.7776e-259	1.38503	0.646	0.033	1.61183e-254
EVA1B	1.43213e-258	1.31974	0.723	0.054	2.96794e-254
MRPS36	9.96145e-258	1.31456	0.635	0.028	2.06441e-253
GRHPR	1.78509e-257	1.21642	0.719	0.051	3.69942e-253
PSMG2	3.34288e-257	1.22995	0.801	0.083	6.92779e-253
MSI2	3.64242e-257	1.25789	0.861	0.097	7.54855e-253
LDHA	3.75463e-257	1.55711	0.979	0.174	7.78109e-253
GIHCG	2.00187e-256	1.48342	0.925	0.147	4.14867e-252
RWDD1	2.07969e-256	1.28608	0.733	0.059	4.30995e-252
UQCRFS1	8.72605e-256	1.28783	0.896	0.124	1.80839e-251
FIS1	1.7949e-255	1.31062	0.806	0.091	3.71975e-251
RBIS	2.66393e-255	1.31063	0.859	0.113	5.52073e-251
NDUFB2	3.22342e-255	1.36415	0.809	0.098	6.68021e-251
RPL23A	5.45114e-255	1.78825	1	0.242	1.12969e-250
MRPS33	7.4144e-255	1.30443	0.669	0.041	1.53656e-250
GSTO1	2.21923e-254	1.25885	0.841	0.102	4.59912e-250
TMEM256	4.45832e-254	1.39581	0.74	0.068	9.23943e-250
SNHG6	4.50473e-254	1.62723	0.993	0.183	9.33561e-250
NFKBIZ	1.04369e-253	-3.03147	0.482	0.907	2.16294e-249
RNF7	1.61513e-253	1.28164	0.831	0.1	3.34719e-249
BRK1	3.82408e-253	1.35316	0.829	0.103	7.92502e-249
ATP5MC1	2.78112e-252	1.38962	0.82	0.1	5.7636e-248
SAT1	4.7043e-252	-1.67564	0.996	0.944	9.7492e-248
PSMB1	4.88708e-252	1.31633	0.93	0.149	1.0128e-247
MGST3	6.73029e-252	1.19617	0.836	0.1	1.39479e-247
COX5B	8.41812e-252	1.46461	0.971	0.166	1.74457e-247
EID1	8.75182e-252	1.30897	0.79	0.088	1.81373e-247
SNU13	1.29853e-251	1.309	0.907	0.132	2.69107e-247
GADD45GIP1	1.63702e-251	1.22479	0.826	0.095	3.39257e-247
TIMM13	1.21808e-250	1.24718	0.884	0.123	2.52434e-246
UBE2L3	4.38767e-250	1.23633	0.859	0.112	9.09301e-246
RTN3	2.25098e-248	1.28048	0.73	0.063	4.66493e-244
AIF1	3.9632e-248	1.70827	0.999	0.206	8.21334e-244
ZCRB1	2.34736e-247	1.21503	0.657	0.039	4.86467e-243
TFDP2	5.33306e-247	1.19677	0.705	0.053	1.10522e-242
SSR3	2.69599e-246	1.20516	0.73	0.064	5.58716e-242
SRP72	3.25796e-246	1.17909	0.84	0.106	6.75179e-242
TMEM219	8.95785e-246	1.23461	0.742	0.07	1.85642e-241
CDK2AP1	1.28319e-245	1.2283	0.662	0.043	2.65929e-241
HNRNPF	1.30204e-245	1.29543	0.741	0.07	2.69835e-241
RAB32	6.89426e-245	1.23947	0.709	0.058	1.42877e-240
EIF3M	1.4935e-244	1.40154	0.958	0.18	3.09513e-240
ARF4	2.10779e-244	1.27696	0.749	0.076	4.36818e-240
PYCARD	2.19145e-244	1.40025	0.883	0.13	4.54155e-240
GNAI3	2.47481e-244	1.26742	0.787	0.087	5.1288e-240
HIGD2A	2.51695e-244	1.37917	0.922	0.146	5.21613e-240
AHCY	5.58547e-244	1.23431	0.621	0.031	1.15753e-239
BST2	8.18205e-244	1.38806	0.936	0.157	1.69565e-239
PTGES3	1.14118e-243	1.34386	0.915	0.145	2.36498e-239
TATDN1	1.45859e-243	1.27342	0.617	0.03	3.02278e-239
EIF3D	1.50658e-243	1.35556	0.96	0.177	3.12223e-239
SSR2	2.1112e-243	1.28285	0.943	0.156	4.37524e-239
RPL10A	3.61675e-243	1.56104	1	0.332	7.49534e-239
LYL1	3.67813e-243	1.19448	0.74	0.068	7.62255e-239
TMEM258	4.19896e-243	1.34992	0.898	0.136	8.70192e-239
POLR1D	6.12343e-243	1.46595	0.987	0.189	1.26902e-238
DCTN3	1.9784e-241	1.22924	0.738	0.073	4.10003e-237
ZFAND1	4.0206e-241	1.20126	0.628	0.034	8.33229e-237
BCAP31	4.73664e-240	1.23621	0.792	0.098	9.81621e-236
PITHD1	4.74952e-240	1.21269	0.696	0.056	9.8429e-236
COX6A1	2.17663e-239	1.30034	0.914	0.151	4.51085e-235
AKIRIN1	7.74879e-239	1.20885	0.911	0.138	1.60586e-234
ERP29	8.89096e-239	1.37778	0.957	0.177	1.84256e-234
CD37	1.17349e-238	1.40864	0.967	0.177	2.43193e-234
CHURC1	1.55854e-238	1.21852	0.766	0.085	3.22991e-234
SNRPC	2.78661e-238	1.23892	0.723	0.07	5.77496e-234
ECHS1	2.80263e-238	1.22416	0.681	0.055	5.80817e-234
PGLS	3.03504e-238	1.27504	0.912	0.153	6.28983e-234
RBM39	4.66442e-238	-1.34962	0.997	0.943	9.66654e-234
PRELID1	7.16587e-238	1.32947	0.926	0.158	1.48506e-233
DYNLL1	1.10682e-237	1.31899	0.865	0.127	2.29377e-233
BUD31	1.7785e-237	1.23756	0.884	0.134	3.68577e-233
PAIP2	2.51034e-237	1.27557	0.88	0.13	5.20242e-233
ATRAID	6.06002e-237	1.27185	0.663	0.049	1.25588e-232
TXNL4A	8.24708e-237	1.23452	0.649	0.044	1.70912e-232
COPS9	1.36277e-236	1.26087	0.741	0.078	2.82421e-232
ERH	4.06424e-236	1.26457	0.687	0.06	8.42273e-232
ATP5MG	4.66532e-236	1.58548	0.994	0.201	9.66841e-232
PSMA5	2.20908e-235	1.21253	0.688	0.058	4.57809e-231
TAF9	4.80868e-235	1.05185	0.852	0.107	9.96552e-231
SERPINB1	5.29689e-235	1.5504	0.992	0.221	1.09773e-230
PSMB3	6.90228e-235	1.24295	0.808	0.107	1.43043e-230
NDUFAB1	8.82987e-235	1.26106	0.621	0.038	1.8299e-230
RPL12	2.10199e-234	1.61502	1	0.285	4.35616e-230
CNBP	2.12917e-234	1.19121	0.822	0.11	4.41249e-230
CST7	3.43509e-234	1.35504	0.497	0	7.11887e-230
NDUFA5	4.81864e-234	1.17337	0.659	0.048	9.98614e-230
GTF3C6	6.54148e-234	1.21139	0.628	0.039	1.35566e-229
ATP6V1F	6.62199e-234	1.26871	0.919	0.153	1.37234e-229
ATP5MF	8.96209e-234	1.2799	0.857	0.124	1.8573e-229
PTGER4	1.59126e-233	-2.80443	0.515	0.888	3.29772e-229
PPIB	1.77956e-233	1.32501	0.937	0.166	3.68797e-229
ADA	2.48718e-233	1.07522	0.635	0.037	5.15443e-229
VDAC2	2.89315e-233	1.29723	0.957	0.173	5.99577e-229
GCSH	2.99315e-233	1.15442	0.522	0.007	6.203e-229
SNRPB	3.31872e-233	1.37513	0.937	0.173	6.87772e-229
C12orf75	6.10138e-233	1.28726	0.584	0.026	1.26445e-228
PDCD2	8.88431e-233	1.17604	0.628	0.04	1.84118e-228
MAGOH	2.1112e-232	1.24712	0.685	0.061	4.37525e-228
HMGN3	2.79068e-232	1.19643	0.859	0.126	5.78341e-228
IAH1	3.10414e-232	1.21224	0.71	0.068	6.43301e-228
CCNB1IP1	3.35207e-232	1.1379	0.804	0.099	6.94683e-228
SYPL1	6.06896e-232	1.17673	0.819	0.107	1.25773e-227
HINT1	2.11602e-231	1.59667	0.999	0.295	4.38524e-227
CNIH1	2.27724e-231	1.14089	0.733	0.073	4.71935e-227
TOMM5	3.07258e-231	1.17093	0.662	0.053	6.36761e-227
NOL7	3.40238e-231	1.12055	0.705	0.064	7.0511e-227
RPL28	4.55964e-231	-0.916286	1	0.972	9.4494e-227
BCAS2	4.76056e-231	1.20398	0.695	0.061	9.86578e-227
NDUFB4	6.4878e-231	1.24504	0.727	0.079	1.34453e-226
RAP1B	7.74672e-231	1.21336	0.896	0.135	1.60543e-226
NDUFAF8	9.64573e-231	1.15488	0.721	0.075	1.99898e-226
MLF2	1.25367e-230	1.1742	0.876	0.135	2.59811e-226
ATP5PD	1.58892e-230	1.28812	0.673	0.059	3.29287e-226
COMMD7	3.87696e-230	1.15424	0.76	0.086	8.03462e-226
YWHAQ	9.8758e-230	1.19087	0.905	0.148	2.04666e-225
PDCD6	1.01945e-229	1.06983	0.671	0.053	2.11272e-225
SMDT1	1.07165e-229	1.13289	0.67	0.055	2.22089e-225
CUTA	2.61474e-229	1.16142	0.893	0.142	5.41878e-225
EMC6	3.18444e-229	1.14313	0.634	0.041	6.59943e-225
ATP5MD	3.48789e-229	1.27033	0.854	0.124	7.2283e-225
MEAF6	4.57791e-229	1.15405	0.621	0.039	9.48726e-225
SPCS2	4.87679e-229	1.18327	0.66	0.053	1.01067e-224
GTF2B	5.03906e-229	1.20731	0.808	0.103	1.04429e-224
TSC22D1	1.51653e-228	1.34342	0.699	0.06	3.14286e-224
KDELR1	1.8029e-228	1.19099	0.712	0.07	3.73633e-224
BEX4	2.21604e-228	1.10607	0.733	0.076	4.59252e-224
NDUFB10	2.24922e-228	1.17449	0.84	0.122	4.66128e-224
ID1	5.3995e-228	1.51812	0.56	0.019	1.11899e-223
PFDN2	5.88962e-228	1.2428	0.925	0.159	1.22056e-223
MGST2	8.74973e-228	1.24871	0.636	0.049	1.81329e-223
SOD1	1.40997e-227	1.22447	0.681	0.061	2.92203e-223
PSME2	1.58383e-227	1.24305	0.714	0.075	3.28233e-223
FBL	2.8942e-227	1.15547	0.838	0.123	5.99793e-223
PRSS21	3.44055e-227	1.05118	0.748	0.079	7.1302e-223
TRMT112	4.70926e-227	1.23842	0.774	0.099	9.75946e-223
DNAJC1	1.0876e-226	1.16742	0.862	0.128	2.25394e-222
MDH1	1.22177e-226	1.11229	0.592	0.031	2.53199e-222
AHR	1.72716e-226	-2.68367	0.574	0.884	3.57936e-222
RPS10	1.84517e-226	1.59955	0.996	0.205	3.82392e-222
SSBP1	1.85139e-226	1.08837	0.85	0.12	3.83681e-222
UQCR10	2.08597e-226	1.23949	0.726	0.079	4.32297e-222
TXNIP	2.07565e-225	1.30924	0.893	0.146	4.30158e-221
RPL6	3.76074e-225	1.57186	1	0.307	7.79376e-221
CHID1	4.54694e-225	1.17941	0.6	0.035	9.42308e-221
C19orf48	1.21686e-224	1.10178	0.656	0.048	2.52182e-220
TMED9	1.39465e-224	1.17833	0.714	0.075	2.89028e-220
CPVL	1.06187e-223	1.21941	0.545	0.018	2.20061e-219
PPT1	1.08183e-223	1.17602	0.643	0.05	2.24199e-219
TXNDC12	1.35198e-223	1.17587	0.565	0.025	2.80184e-219
UBE2S	6.84306e-223	1.16985	0.893	0.145	1.41816e-218
MED28	1.10309e-222	1.01411	0.728	0.074	2.28604e-218
BTF3L4	1.12572e-222	1.13536	0.663	0.057	2.33294e-218
GGCT	1.1328e-222	1.13634	0.609	0.039	2.34762e-218
MRPS21	1.68119e-222	1.19437	0.734	0.086	3.48409e-218
LSM4	6.06655e-222	1.19758	0.685	0.066	1.25723e-217
UQCR11	1.57476e-221	1.2668	0.922	0.152	3.26354e-217
IDH2	1.99212e-221	1.11406	0.655	0.054	4.12847e-217
AP2M1	2.35274e-221	1.21329	0.741	0.09	4.87581e-217
SNHG16	2.80957e-221	1.05531	0.769	0.094	5.82256e-217
RBM3	1.06187e-220	1.38547	0.985	0.22	2.20063e-216
RPS19BP1	1.20532e-220	1.07318	0.714	0.077	2.4979e-216
TMED3	1.96012e-220	1.21802	0.614	0.043	4.06215e-216
ATXN10	2.44826e-220	1.15392	0.581	0.032	5.07377e-216
MRPL4	7.27127e-220	1.06776	0.733	0.083	1.5069e-215
RPS15A	9.4773e-220	1.44917	1	0.335	1.96408e-215
HEBP1	2.67479e-219	1.15585	0.535	0.018	5.54324e-215
PTMA	5.78696e-219	-0.974601	1	0.958	1.19929e-214
TUBA1B	7.35845e-219	1.37473	0.976	0.203	1.52497e-214
EIF4H	1.93796e-218	1.06078	0.855	0.131	4.01623e-214
RPL22	3.41606e-218	1.61128	1	0.251	7.07945e-214
TM7SF3	5.65195e-218	1.04547	0.696	0.066	1.17131e-213
SELENOH	8.60963e-218	1.24085	0.942	0.177	1.78426e-213
NIT2	1.22465e-217	1.11596	0.595	0.036	2.53797e-213
SLBP	2.14224e-217	1.14566	0.68	0.063	4.43958e-213
PCBD1	3.61577e-217	1.18737	0.556	0.028	7.49331e-213
RAB13	5.6567e-217	1.09983	0.616	0.042	1.17229e-212
HLA-DPA1	1.48886e-216	1.37637	0.831	0.134	3.0855e-212
RILPL2	1.9072e-216	1.15842	0.912	0.155	3.95249e-212
DYNLT1	3.20635e-216	1.11589	0.542	0.02	6.64483e-212
ATP2C1	3.53193e-216	1.06471	0.79	0.1	7.31957e-212
ARPC5L	3.94778e-216	1.05589	0.876	0.136	8.18139e-212
RFLNB	4.00514e-216	1.15696	0.804	0.112	8.30026e-212
TUBB	1.50247e-215	1.16064	0.799	0.114	3.11371e-211
URI1	2.01577e-215	1.08459	0.628	0.048	4.17748e-211
LSM7	2.58158e-215	1.24874	0.961	0.193	5.35006e-211
SNRPD2	3.03275e-215	1.21357	0.957	0.189	6.28508e-211
TOMM7	8.82823e-215	1.39366	0.987	0.203	1.82956e-210
SRP9	1.01981e-214	1.05207	0.688	0.069	2.11345e-210
SARAF	1.33792e-214	1.16866	0.954	0.185	2.7727e-210
GHITM	1.00698e-213	1.05432	0.79	0.106	2.08686e-209
PSMA7	2.76272e-213	1.15159	0.926	0.173	5.72545e-209
MYL12A	2.49235e-212	1.18914	0.858	0.14	5.16514e-208
PRMT1	4.04003e-212	1.13783	0.765	0.103	8.37256e-208
C1D	1.19294e-211	1.01301	0.667	0.063	2.47225e-207
RPN2	1.27298e-211	1.1145	0.816	0.123	2.63812e-207
ERGIC3	1.77677e-211	1.09585	0.749	0.096	3.68217e-207
KRTCAP2	2.82772e-211	1.05783	0.845	0.135	5.86016e-207
FAH	3.89645e-211	1.02481	0.547	0.025	8.07501e-207
NFKBIA	1.63349e-210	-1.71758	0.954	0.911	3.38524e-206
RPL26	3.12564e-210	1.44807	1	0.346	6.47757e-206
TRIR	4.66512e-210	1.20551	0.928	0.176	9.66799e-206
TMSB4X	1.20908e-209	-1.23738	0.996	0.911	2.5057e-205
MED30	1.38126e-209	1.06388	0.632	0.053	2.86253e-205
RPSA	1.91324e-209	1.41179	1	0.357	3.965e-205
NUDT1	4.44036e-209	1.09346	0.71	0.08	9.20221e-205
H3F3B	5.76851e-209	-0.872107	1	0.966	1.19547e-204
STRAP	8.5622e-209	1.13895	0.897	0.162	1.77443e-204
PUF60	1.01615e-208	1.00311	0.74	0.093	2.10587e-204
SELENOK	1.26117e-208	1.05902	0.825	0.125	2.61365e-204
NDFIP1	3.11106e-208	1.02296	0.706	0.077	6.44736e-204
YTHDF2	3.74702e-208	0.997629	0.786	0.112	7.76532e-204
PA2G4	6.41159e-208	1.09283	0.816	0.125	1.32874e-203
SSBP2	7.02548e-208	1.03869	0.536	0.024	1.45596e-203
ANP32B	8.23661e-208	1.23176	0.964	0.201	1.70696e-203
UQCRQ	7.2307e-207	1.14378	0.791	0.114	1.49849e-202
PSMC5	2.54205e-206	1.16753	0.65	0.067	5.26815e-202
MRPS24	2.6798e-206	1.08371	0.809	0.123	5.55361e-202
NOP53	3.16936e-206	1.37084	0.992	0.239	6.56818e-202
TPRKB	7.71708e-206	1.04793	0.499	0.015	1.59929e-201
GMPR2	8.95515e-206	1.09129	0.501	0.016	1.85587e-201
ECH1	1.28643e-205	1.07729	0.712	0.087	2.66599e-201
ICAM3	1.5583e-205	1.14852	0.939	0.184	3.22942e-201
YRDC	1.59072e-205	1.11762	0.561	0.033	3.29661e-201
HHEX	1.99947e-205	1.05134	0.73	0.087	4.1437e-201
C9orf16	2.18892e-205	1.166	0.948	0.191	4.53632e-201
RTF2	2.69081e-205	1.06186	0.685	0.077	5.57643e-201
IRF2BP2	6.25606e-205	-1.73086	0.925	0.893	1.29651e-200
RAB2A	1.26403e-204	1.04024	0.78	0.113	2.61957e-200
SEPTIN6	2.33217e-204	1.05272	0.918	0.176	4.8332e-200
NPR3	3.65864e-204	1.07386	0.44	0	7.58216e-200
UBE2V1	3.67169e-204	1.02199	0.744	0.098	7.60921e-200
TPSB2	6.27606e-204	1.11164	0.485	0.011	1.30065e-199
UQCRB	8.74029e-204	1.46959	0.994	0.245	1.81134e-199
MYL6B	1.6107e-203	1.12603	0.547	0.032	3.33802e-199
MAX	4.49656e-203	0.926364	0.747	0.093	9.31866e-199
RPL17	5.0737e-203	1.24987	1	0.436	1.05147e-198
PABPC1	5.51012e-203	-0.961848	1	0.928	1.14192e-198
PQBP1	8.60085e-203	1.05846	0.643	0.063	1.78244e-198
TOMM20	1.09061e-202	1.27617	0.986	0.227	2.26018e-198
PLIN3	1.49792e-202	0.996617	0.759	0.104	3.1043e-198
HPRT1	1.9788e-202	1.08769	0.649	0.065	4.10086e-198
STMP1	3.00772e-202	1.05412	0.833	0.137	6.23321e-198
GABARAPL2	4.33099e-202	1.05509	0.808	0.125	8.97555e-198
PAICS	4.52291e-202	1.03707	0.529	0.025	9.37328e-198
TRAPPC6A	9.47341e-202	0.992906	0.737	0.097	1.96327e-197
TWF2	9.93173e-202	1.06519	0.613	0.053	2.05825e-197
NDUFA11	2.93824e-201	1.07696	0.922	0.184	6.0892e-197
GNG10	2.94597e-201	1.08834	0.521	0.024	6.10523e-197
RPL30	3.13341e-201	1.40554	1	0.333	6.49368e-197
FKBP1A	5.42769e-201	1.12232	0.855	0.149	1.12483e-196
MOB4	8.27616e-201	0.974529	0.648	0.063	1.71515e-196
SRP14	8.49759e-201	1.43568	0.994	0.24	1.76104e-196
DNAJC8	1.20932e-200	1.0311	0.67	0.075	2.5062e-196
DDX3X	2.04428e-200	-1.7062	0.953	0.901	4.23657e-196
RPS12	3.18013e-200	1.40431	1	0.341	6.5905e-196
TNFRSF12A	3.96498e-200	1.06639	0.636	0.061	8.21702e-196
TXNDC5	5.15328e-200	1.07281	0.49	0.016	1.06796e-195
TMBIM6	6.4829e-200	1.11248	0.903	0.173	1.34352e-195
CSNK2B	8.76723e-200	1.04845	0.769	0.112	1.81692e-195
GMFG	9.58425e-200	1.24921	0.961	0.192	1.98624e-195
SSR4	9.63644e-200	1.2513	0.975	0.221	1.99706e-195
MRPL51	1.09219e-199	1.08254	0.577	0.043	2.26345e-195
XRCC5	1.54779e-199	0.978405	0.664	0.069	3.20765e-195
NCK1	1.96086e-199	1.00834	0.563	0.035	4.06369e-195
CCDC85B	2.81394e-199	1.06748	0.755	0.108	5.83162e-195
NDUFA7	3.79772e-199	1.07966	0.588	0.048	7.87039e-195
RPL22L1	4.38097e-199	1.2372	0.953	0.204	9.07912e-195
KLF6	9.34659e-199	-1.14741	1	0.917	1.93699e-194
VDAC3	9.48869e-199	0.997931	0.623	0.056	1.96644e-194
ATP5F1A	9.77994e-199	1.02574	0.943	0.182	2.02679e-194
HADHA	1.03228e-198	1.01088	0.776	0.115	2.1393e-194
EIF2S3	1.69746e-198	1.23808	0.976	0.222	3.51783e-194
RPL4	1.7703e-198	1.52689	0.999	0.275	3.66877e-194
PAFAH1B3	2.0592e-198	1.06219	0.479	0.013	4.26748e-194
AK5	2.36136e-198	1.10683	0.492	0.017	4.89368e-194
RNASET2	3.66868e-198	1.17882	0.965	0.213	7.60296e-194
HSD17B10	4.59574e-198	1.07416	0.563	0.039	9.52421e-194
PLP2	5.63236e-198	1.11377	0.928	0.187	1.16725e-193
RYBP	9.05332e-198	1.01982	0.649	0.064	1.87621e-193
CCT6A	1.03658e-197	1.02414	0.742	0.104	2.14822e-193
HNRNPH1	2.7564e-197	-1.3671	0.983	0.888	5.71237e-193
RUNX1	9.93146e-197	0.970697	0.808	0.123	2.0582e-192
CAMTA1	2.01349e-196	1.07737	0.646	0.071	4.17276e-192
ORAI3	2.9342e-196	1.06479	0.556	0.038	6.08084e-192
RPL36AL	4.57273e-196	1.40668	0.99	0.246	9.47652e-192
MICOS13	5.90085e-196	0.986689	0.802	0.126	1.22289e-191
CRBN	6.55472e-196	0.95429	0.595	0.047	1.3584e-191
PDIA6	9.01163e-196	1.07483	0.819	0.142	1.86757e-191
IFITM2	1.0694e-195	1.1243	0.776	0.122	2.21622e-191
PSMB2	1.4348e-195	1.00785	0.645	0.07	2.97349e-191
RAB4A	1.49416e-195	1.05351	0.561	0.04	3.0965e-191
CUEDC2	8.86025e-195	1.03535	0.606	0.056	1.8362e-190
TPM4	9.50907e-195	0.97415	0.858	0.141	1.97066e-190
ANAPC11	1.93025e-194	1.11739	0.621	0.064	4.00026e-190
ARHGDIB	2.00786e-194	1.16693	0.968	0.206	4.16109e-190
MRPS15	2.88408e-194	0.984526	0.652	0.072	5.97698e-190
FOS	1.11456e-193	-1.21696	0.99	0.915	2.30981e-189
STK17A	1.31621e-193	1.03058	0.472	0.013	2.72772e-189
HDGF	1.41654e-193	0.99071	0.76	0.114	2.93563e-189
TMEM50A	1.95133e-193	0.983003	0.695	0.089	4.04394e-189
MLC1	2.06137e-193	0.988549	0.419	0	4.27198e-189
SEM1	2.78954e-193	1.08021	0.783	0.123	5.78105e-189
MATK	3.55474e-193	0.993111	0.552	0.035	7.36685e-189
LRRC59	5.57504e-193	0.970971	0.571	0.043	1.15537e-188
UBE2L6	9.31023e-193	1.03904	0.472	0.014	1.92945e-188
KHDRBS1	9.53703e-193	0.996499	0.918	0.18	1.97645e-188
MRPL47	1.08909e-192	1.02408	0.568	0.045	2.25703e-188
FIBP	1.15073e-192	0.999084	0.635	0.066	2.38477e-188
WASF2	1.18513e-192	0.930185	0.675	0.077	2.45607e-188
SNRPB2	1.21075e-192	1.00159	0.701	0.093	2.50915e-188
RAN	1.2148e-192	1.19965	0.964	0.22	2.51755e-188
BANF1	1.44054e-192	1.09676	0.614	0.062	2.98537e-188
POLR2F	2.14216e-192	1.03508	0.532	0.033	4.43941e-188
LAGE3	3.29439e-192	1.00585	0.549	0.037	6.82729e-188
JPT1	4.76698e-192	1.04401	0.603	0.055	9.87908e-188
ALYREF	6.27484e-192	0.951758	0.797	0.127	1.3004e-187
MAZ	7.94542e-192	1.04135	0.894	0.17	1.64661e-187
PSMA1	9.40452e-192	1.0393	0.929	0.191	1.94899e-187
C1orf43	1.42668e-191	1.00622	0.538	0.035	2.95665e-187
MPO	2.81491e-191	1.43945	0.415	0	5.83361e-187
SLC25A6	8.20388e-191	1.36036	0.996	0.245	1.70017e-186
RCN2	8.57917e-191	0.945168	0.624	0.061	1.77795e-186
GAMT	1.17478e-190	0.876749	0.646	0.068	2.43462e-186
EEF1G	1.42726e-190	1.44514	0.999	0.309	2.95784e-186
YBX1	1.71314e-190	1.40842	0.997	0.289	3.55032e-186
EMC7	2.40584e-190	0.944692	0.521	0.028	4.98587e-186
PDRG1	7.56302e-190	0.989471	0.536	0.034	1.56736e-185
CWC15	8.03958e-190	0.906778	0.657	0.076	1.66612e-185
RPS27A	3.02233e-189	1.28424	1	0.394	6.26348e-185
SERP1	3.13819e-189	1.2168	0.972	0.218	6.50358e-185
HMGA1	4.43752e-189	1.13758	0.955	0.203	9.19632e-185
AC020916.1	6.56895e-189	-1.43207	0.985	0.929	1.36135e-184
NDUFA12	8.04723e-189	0.990772	0.592	0.054	1.66771e-184
HCST	8.37538e-189	1.17613	0.96	0.19	1.73571e-184
SNX2	9.77638e-189	0.943325	0.714	0.095	2.02606e-184
DRAP1	1.99052e-188	0.989506	0.843	0.151	4.12516e-184
TMEM126A	2.42802e-188	1.02547	0.519	0.032	5.03184e-184
UQCRC2	1.22441e-187	0.926931	0.76	0.117	2.53747e-183
KDELR2	1.35348e-187	0.990409	0.563	0.044	2.80496e-183
IFT57	1.56335e-187	0.952341	0.526	0.032	3.23988e-183
ZNF428	1.75903e-187	0.950734	0.72	0.1	3.64542e-183
NOB1	1.99114e-187	0.997207	0.483	0.02	4.12644e-183
UBE2G1	2.41315e-187	0.989565	0.561	0.045	5.00102e-183
ITGAE	3.89285e-187	1.00062	0.585	0.053	8.06754e-183
ILF2	4.20911e-187	1.00346	0.909	0.183	8.72296e-183
POLR2I	9.4644e-187	1.02413	0.556	0.045	1.9614e-182
NAA20	1.23697e-186	0.937316	0.467	0.016	2.5635e-182
COX8A	1.38166e-186	1.09353	0.933	0.183	2.86335e-182
ZNF593	1.48605e-186	0.961693	0.691	0.092	3.07969e-182
RPS13	1.71846e-186	1.27237	1	0.396	3.56135e-182
EIF2AK2	2.49713e-186	0.960331	0.561	0.045	5.17506e-182
FOXC1	2.58654e-186	1.03275	0.405	0	5.36034e-182
LMAN2	5.93896e-186	0.98033	0.692	0.093	1.23079e-181
C11orf74	6.20029e-186	1.04537	0.468	0.018	1.28495e-181
TCEAL4	9.81741e-186	0.921874	0.584	0.051	2.03456e-181
C4orf3	1.04035e-185	1.06252	0.581	0.056	2.15602e-181
MCTS1	1.11424e-185	0.972762	0.581	0.053	2.30914e-181
CANX	2.73345e-185	1.01183	0.845	0.16	5.6648e-181
RAC1	5.56656e-185	0.964837	0.926	0.194	1.15361e-180
GNB4	8.22966e-185	0.910636	0.51	0.027	1.70551e-180
PDZD8	8.80852e-185	0.970763	0.579	0.05	1.82548e-180
MMADHC	1.31564e-184	0.920904	0.609	0.061	2.72652e-180
POLR2J	1.36558e-184	0.945723	0.66	0.081	2.83002e-180
ODC1	1.40863e-184	0.967584	0.557	0.042	2.91925e-180
XRCC6	2.5629e-184	0.978091	0.772	0.128	5.31135e-180
CFAP36	3.06464e-184	0.983583	0.46	0.014	6.35116e-180
AURKAIP1	9.68137e-184	0.988108	0.662	0.084	2.00637e-179
NUDT5	1.02622e-183	1.00333	0.508	0.031	2.12674e-179
QPRT	1.22422e-183	0.950309	0.439	0.009	2.53707e-179
COPS3	1.72425e-183	0.944447	0.688	0.09	3.57333e-179
BCL11A	3.44374e-183	0.883891	0.568	0.047	7.13681e-179
UBE2D2	3.9872e-183	0.833013	0.809	0.137	8.26308e-179
CNOT7	4.71489e-183	0.974753	0.539	0.041	9.77114e-179
COX16	8.25975e-183	1.02021	0.532	0.04	1.71175e-178
CHCHD10	1.33263e-182	0.995586	0.617	0.066	2.76173e-178
SSNA1	2.73004e-182	1.00815	0.565	0.049	5.65774e-178
IER3IP1	2.94023e-182	0.97181	0.545	0.044	6.09334e-178
TBCB	4.54635e-182	0.941943	0.603	0.064	9.42185e-178
PRDX4	5.197e-182	1.01084	0.418	0.005	1.07703e-177
YES1	1.08986e-181	0.975448	0.448	0.013	2.25864e-177
LYSMD2	1.1768e-181	0.926573	0.531	0.038	2.4388e-177
RPS3A	1.5052e-181	1.19547	1	0.45	3.11937e-177
HDDC2	1.71532e-181	0.940996	0.517	0.035	3.55482e-177
HEBP2	1.74826e-181	0.924653	0.705	0.101	3.6231e-177
MATN4	2.23516e-181	1.01823	0.396	0	4.63215e-177
ABHD14B	2.32575e-181	0.917068	0.719	0.103	4.81989e-177
ANXA7	2.98808e-181	0.800717	0.788	0.128	6.19249e-177
ZNF277	1.30122e-180	0.958506	0.464	0.018	2.69666e-176
PDCD5	1.74353e-180	1.0215	0.476	0.024	3.61329e-176
LSM1	2.04106e-180	0.934662	0.49	0.026	4.22989e-176
RPL19	4.21348e-180	1.20319	1	0.394	8.73202e-176
COX11	4.86676e-180	0.933422	0.451	0.016	1.00859e-175
UCHL3	5.25908e-180	0.955032	0.494	0.027	1.08989e-175
FDX1	5.72669e-180	0.967921	0.614	0.067	1.1868e-175
FAM204A	6.7483e-180	0.861255	0.713	0.101	1.39852e-175
SS18L2	7.21515e-180	0.935341	0.628	0.071	1.49527e-175
SARNP	7.93307e-180	0.849667	0.763	0.12	1.64405e-175
ELOC	9.47759e-180	0.897175	0.787	0.132	1.96414e-175
LMAN1	1.53037e-179	0.942699	0.56	0.048	3.17154e-175
HNRNPAB	1.85037e-179	0.8947	0.748	0.119	3.83472e-175
OCIAD1	2.58779e-179	0.90532	0.748	0.12	5.36293e-175
CLPP	2.96451e-179	0.904243	0.546	0.045	6.14366e-175
UBL5	4.07075e-179	1.03865	0.891	0.175	8.43621e-175
SEC61G	4.21671e-179	0.962387	0.841	0.155	8.73871e-175
ATP5MC3	4.30529e-179	1.17079	0.978	0.241	8.92229e-175
LSM12	1.33777e-178	0.970755	0.603	0.066	2.77239e-174
PNKD	1.84257e-178	0.919249	0.565	0.052	3.81853e-174
HOXB2	2.19571e-178	0.899601	0.643	0.077	4.55039e-174
VBP1	2.62695e-178	0.913632	0.44	0.013	5.44409e-174
ARPC1A	2.75925e-178	0.945589	0.499	0.029	5.71827e-174
NDUFB1	4.64261e-178	1.00159	0.723	0.109	9.62135e-174
CCT2	4.70239e-178	0.887312	0.886	0.175	9.74524e-174
SLC38A1	8.41696e-178	0.932676	0.472	0.021	1.74433e-173
SUCLG1	8.65679e-178	0.875059	0.614	0.066	1.79403e-173
MRPL21	1.8811e-177	0.922777	0.513	0.035	3.8984e-173
MRPL45	2.33113e-177	0.957243	0.467	0.022	4.83103e-173
CD44	4.2103e-177	-1.39493	0.979	0.884	8.72543e-173
TRAPPC1	1.25889e-176	0.994473	0.664	0.09	2.60893e-172
CDC123	1.34503e-176	0.898855	0.542	0.043	2.78745e-172
CSTB	2.21702e-176	0.901018	0.76	0.127	4.59456e-172
MRPL22	2.51658e-176	0.902953	0.542	0.045	5.21536e-172
EBNA1BP2	4.73453e-176	0.949029	0.435	0.013	9.81184e-172
CHCHD2	8.59894e-176	1.30149	0.994	0.275	1.78205e-171
SLC38A2	9.38993e-176	-1.99729	0.85	0.85	1.94597e-171
TMEM141	9.42342e-176	0.967494	0.475	0.026	1.95291e-171
RPS6	1.34143e-175	1.21697	1	0.411	2.77999e-171
FGFR1OP2	1.34318e-175	0.900825	0.579	0.057	2.7836e-171
TRG-AS1	1.46872e-175	0.948596	0.471	0.021	3.04378e-171
EIF2S2	2.64613e-175	0.979182	0.614	0.075	5.48385e-171
CIRBP	3.61506e-175	1.07617	0.978	0.241	7.49186e-171
VKORC1	4.49896e-175	0.985411	0.517	0.039	9.32365e-171
SPNS2	4.54378e-175	0.931018	0.383	0	9.41653e-171
RPS7	4.76298e-175	1.1468	1	0.442	9.8708e-171
SNRPA	5.72106e-175	0.940475	0.638	0.08	1.18563e-170
CCDC59	5.94937e-175	0.901174	0.837	0.156	1.23295e-170
HADHB	7.46887e-175	0.869784	0.636	0.078	1.54785e-170
PRDX3	7.49557e-175	0.938656	0.472	0.025	1.55338e-170
FHL3	1.74352e-174	1.00828	0.442	0.016	3.61328e-170
HNRNPA0	1.74545e-174	0.950761	0.923	0.205	3.61727e-170
PRPF38A	2.21958e-174	0.864462	0.642	0.08	4.59986e-170
BRI3	2.77084e-174	0.919296	0.903	0.191	5.74229e-170
SDHD	3.22429e-174	0.956219	0.489	0.029	6.68203e-170
MRPL3	6.06404e-174	0.96849	0.437	0.016	1.25671e-169
CD99	8.82016e-174	0.925179	0.876	0.177	1.82789e-169
RPS20	1.19335e-173	1.33103	0.997	0.264	2.47309e-169
EPS15	1.27192e-173	0.839301	0.662	0.085	2.63593e-169
RPS4X	1.53747e-173	1.20448	1	0.443	3.18626e-169
RPL18	1.69062e-173	1.32136	1	0.333	3.50365e-169
TUFM	1.7633e-173	0.938899	0.919	0.206	3.65426e-169
COX14	1.84845e-173	0.979746	0.572	0.06	3.83074e-169
ARMC10	1.98211e-173	0.912603	0.461	0.022	4.10773e-169
RSL1D1	2.77983e-173	0.969293	0.967	0.221	5.76092e-169
SCP2	2.80208e-173	0.974206	0.627	0.078	5.80703e-169
DYNLL2	4.88247e-173	0.844233	0.642	0.08	1.01184e-168
AC002454.1	5.62905e-173	1.01601	0.379	0	1.16657e-168
PCNP	7.59813e-173	0.879081	0.675	0.094	1.57464e-168
ZNF511	1.09979e-172	0.864777	0.613	0.071	2.2792e-168
SNRPG	1.27779e-172	0.951391	0.692	0.103	2.6481e-168
MAPRE1	1.72708e-172	0.889502	0.79	0.143	3.5792e-168
TUBA1C	1.85959e-172	0.854428	0.79	0.138	3.85382e-168
DCP1A	2.24077e-172	0.804117	0.71	0.102	4.64376e-168
RPL3	4.64154e-172	1.18883	1	0.438	9.61912e-168
FUNDC2	1.01721e-171	0.950125	0.507	0.037	2.10807e-167
CCT5	2.25871e-171	0.907331	0.54	0.047	4.68096e-167
PLEKHJ1	2.29864e-171	0.961799	0.521	0.043	4.7637e-167
MT-ATP8	2.5831e-171	-2.49668	0.561	0.824	5.35321e-167
ARL5A	3.18978e-171	0.947243	0.525	0.043	6.61049e-167
LAMTOR4	9.59905e-171	0.993829	0.926	0.205	1.98931e-166
MRPS35	1.44613e-170	0.911402	0.458	0.022	2.99695e-166
CAT	3.32536e-170	1.09055	0.955	0.229	6.89148e-166
CD302	4.66742e-170	0.981224	0.636	0.086	9.67275e-166
NDUFB9	4.89053e-170	0.88249	0.783	0.14	1.01351e-165
YWHAG	7.09921e-170	0.857532	0.603	0.07	1.47124e-165
IDS	1.21836e-169	0.997231	0.932	0.208	2.52493e-165
PMF1	1.4746e-169	0.902366	0.526	0.045	3.05596e-165
FTL	1.75805e-169	1.27704	1	0.328	3.64339e-165
CHMP2B	2.42378e-169	0.898849	0.51	0.04	5.02305e-165
YIF1A	2.59926e-169	0.878655	0.469	0.027	5.3867e-165
ARPC1B	2.77049e-169	1.06665	0.951	0.223	5.74156e-165
RPL9	5.32417e-169	1.21955	1	0.382	1.10338e-164
CFAP298	7.16871e-169	0.920674	0.435	0.017	1.48564e-164
RPL5	9.98897e-169	1.12517	1	0.466	2.07011e-164
MRPL54	1.78617e-168	0.811892	0.714	0.112	3.70167e-164
RAC2	1.8997e-168	0.970761	0.87	0.173	3.93694e-164
RPL27	3.43088e-168	1.35886	1	0.282	7.11015e-164
CNPY2	3.98799e-168	0.831735	0.645	0.086	8.26472e-164
PSMD8	5.61617e-168	0.86191	0.858	0.175	1.16389e-163
SRP19	6.99504e-168	0.874303	0.547	0.052	1.44965e-163
UBXN1	7.21962e-168	0.854658	0.887	0.187	1.49619e-163
COPS6	9.52189e-168	0.79188	0.713	0.11	1.97332e-163
NUTF2	1.1674e-167	0.871716	0.72	0.118	2.41932e-163
LYRM4	1.42128e-167	0.899598	0.49	0.035	2.94547e-163
FAM136A	2.04311e-167	0.856549	0.591	0.067	4.23415e-163
ERP44	3.77985e-167	0.929396	0.531	0.049	7.83336e-163
BAX	5.34703e-167	0.836932	0.809	0.152	1.10812e-162
DENR	9.70508e-167	0.912186	0.593	0.07	2.01128e-162
DNAJC19	1.44913e-166	0.915299	0.414	0.013	3.00318e-162
RPS25	5.55562e-166	1.28984	1	0.35	1.15135e-161
C12orf10	1.10455e-165	0.917779	0.475	0.031	2.28907e-161
ANAPC15	1.11591e-165	0.956417	0.504	0.042	2.31261e-161
TXNL1	1.1858e-165	0.783289	0.788	0.144	2.45746e-161
SYAP1	2.26341e-165	0.88933	0.621	0.08	4.69069e-161
RPLP0	3.04855e-165	1.28643	1	0.366	6.31782e-161
SUMO3	3.09843e-165	0.861778	0.673	0.101	6.42118e-161
RPL35A	3.58649e-165	1.16183	1	0.424	7.43264e-161
ORAI1	4.3097e-165	0.818213	0.546	0.051	8.93142e-161
C20orf27	4.32557e-165	0.936703	0.472	0.031	8.96431e-161
TMEM179B	4.3423e-165	0.959386	0.471	0.032	8.99897e-161
WDR74	6.04726e-165	-2.85428	0.306	0.761	1.25323e-160
CPSF6	6.07371e-165	0.710229	0.84	0.162	1.25872e-160
RPL7A	1.08252e-164	1.1844	1	0.421	2.24342e-160
CHMP2A	1.37599e-164	0.828326	0.786	0.149	2.85161e-160
PIGP	1.38452e-164	0.892066	0.411	0.013	2.86928e-160
METTL26	1.68143e-164	0.837168	0.813	0.152	3.4846e-160
RPS23	1.80152e-164	1.12406	1	0.428	3.73347e-160
LAMTOR5	2.11341e-164	0.772786	0.795	0.15	4.37984e-160
EEF1E1	2.18603e-164	0.912901	0.494	0.038	4.53033e-160
EMC3	2.79258e-164	0.773582	0.613	0.076	5.78735e-160
GMDS	3.67483e-164	0.909991	0.432	0.019	7.61572e-160
PIN1	8.73079e-164	0.869019	0.549	0.056	1.80937e-159
DSTN	1.0032e-163	0.819367	0.753	0.131	2.07902e-159
CLTB	1.35475e-163	0.911648	0.561	0.062	2.80758e-159
TRAPPC2L	2.41107e-163	0.91346	0.528	0.051	4.9967e-159
GLO1	4.16779e-163	0.983397	0.458	0.029	8.63734e-159
SNF8	5.44027e-163	0.860903	0.609	0.077	1.12744e-158
RBM27	6.02899e-163	0.775495	0.6	0.072	1.24945e-158
LETMD1	6.27853e-163	0.835803	0.539	0.051	1.30116e-158
CKS2	1.24144e-162	0.897711	0.713	0.116	2.57276e-158
NIFK	1.4057e-162	0.83759	0.533	0.049	2.91317e-158
MSRB3	1.572e-162	0.809689	0.597	0.073	3.25781e-158
TMCO3	1.88637e-162	0.71752	0.678	0.099	3.90931e-158
GLTP	2.95527e-162	0.863751	0.501	0.04	6.1245e-158
IGFBP7	3.05206e-162	0.943762	0.657	0.101	6.32508e-158
GNB1	3.20016e-162	0.818435	0.717	0.12	6.63202e-158
PPP1CC	3.25725e-162	0.845428	0.643	0.091	6.75033e-158
ERCC1	3.5742e-162	0.876064	0.589	0.072	7.40717e-158
ARL6IP4	5.12469e-162	0.908504	0.95	0.227	1.06204e-157
RNF125	6.13447e-162	0.896831	0.433	0.019	1.27131e-157
ARF5	6.92447e-162	0.934258	0.625	0.088	1.43503e-157
TMEM18	7.55218e-162	0.921399	0.483	0.036	1.56511e-157
CPNE1	7.60712e-162	0.834438	0.674	0.105	1.5765e-157
COX6B1	1.01392e-161	1.06374	0.974	0.229	2.10124e-157
PSMB5	1.62911e-161	0.907484	0.423	0.018	3.37617e-157
RNASEH2C	1.72928e-161	0.879939	0.766	0.139	3.58377e-157
HLA-DPB1	3.19767e-161	0.988553	0.816	0.164	6.62685e-157
PSMA4	4.4313e-161	0.809249	0.752	0.136	9.18343e-157
NSMCE1	4.9206e-161	0.881288	0.535	0.054	1.01975e-156
CD52	5.77689e-161	0.929719	0.639	0.09	1.1972e-156
PPP1CB	5.99236e-161	0.935643	0.942	0.223	1.24186e-156
LUZP1	6.78698e-161	0.673642	0.773	0.131	1.40653e-156
ATP6AP2	8.94705e-161	0.756623	0.784	0.145	1.85419e-156
PSMB8	9.81965e-161	0.853646	0.582	0.069	2.03502e-156
ZNF331	1.537e-160	0.91926	0.432	0.02	3.18528e-156
MPST	2.23608e-160	0.951544	0.621	0.087	4.63405e-156
CMPK1	6.7467e-160	0.909103	0.588	0.073	1.39819e-155
PGK1	7.45774e-160	0.914532	0.918	0.217	1.54554e-155
TRIAP1	1.00211e-159	0.872977	0.485	0.038	2.07678e-155
RHEB	1.01809e-159	0.734865	0.781	0.146	2.10989e-155
PDAP1	1.09175e-159	0.859739	0.49	0.04	2.26255e-155
AP3S1	1.6583e-159	0.902192	0.522	0.05	3.43666e-155
KCMF1	2.50436e-159	0.825551	0.561	0.063	5.19004e-155
RPS14	3.16065e-159	1.1856	1	0.402	6.55013e-155
ZNRD1	3.68936e-159	0.838858	0.536	0.055	7.64583e-155
FSCN1	3.79831e-159	0.703328	0.694	0.107	7.87161e-155
CMTM3	5.72905e-159	0.870067	0.519	0.05	1.18729e-154
PSMD9	1.00708e-158	0.876508	0.55	0.061	2.08707e-154
ADSL	1.10586e-158	0.819557	0.478	0.035	2.29178e-154
RETN	1.85008e-158	1.01621	0.35	0	3.83411e-154
ABHD14A	2.42146e-158	0.918	0.414	0.018	5.01824e-154
RPL39	2.87689e-158	0.95259	1	0.406	5.96208e-154
GABARAP	2.99382e-158	1.00115	0.967	0.238	6.20439e-154
SNHG17	3.20703e-158	0.781227	0.688	0.11	6.64625e-154
CCNC	4.49157e-158	0.814388	0.535	0.054	9.30833e-154
SMIM20	5.54374e-158	0.862537	0.415	0.018	1.14889e-153
ATP5MC2	6.01289e-158	1.31566	1	0.285	1.24611e-153
CCND2	7.11901e-158	0.837908	0.44	0.024	1.47534e-153
UROS	8.96985e-158	0.84589	0.479	0.037	1.85891e-153
RAP1A	1.92882e-157	0.845368	0.522	0.05	3.99728e-153
SIK3	1.93124e-157	0.75192	0.67	0.1	4.0023e-153
NUDC	3.93233e-157	0.760916	0.657	0.1	8.14935e-153
KRT10	4.08173e-157	0.930183	0.586	0.077	8.45898e-153
SSB	5.76621e-157	0.736915	0.886	0.188	1.19499e-152
NMI	6.85153e-157	0.837475	0.426	0.021	1.41991e-152
SOX4	9.15508e-157	0.766341	0.844	0.167	1.8973e-152
CRNDE	1.63155e-156	0.876912	0.455	0.029	3.38123e-152
ETFB	2.07023e-156	0.817436	0.671	0.109	4.29034e-152
CYBA	2.12965e-156	-0.946524	0.996	0.878	4.41349e-152
CPXM1	2.75783e-156	0.797297	0.422	0.019	5.71533e-152
TIMM9	3.19028e-156	0.884179	0.408	0.017	6.61154e-152
PPP1R7	3.89365e-156	0.908591	0.482	0.04	8.0692e-152
RNF114	4.11681e-156	0.703817	0.767	0.141	8.53167e-152
LAMTOR2	6.21128e-156	0.980894	0.563	0.07	1.28723e-151
CTSA	7.90385e-156	0.743194	0.818	0.162	1.63799e-151
GINM1	1.0275e-155	0.824807	0.535	0.056	2.12939e-151
BFAR	1.51944e-155	0.84807	0.439	0.025	3.14888e-151
MCL1	1.66127e-155	-0.91622	1	0.887	3.44282e-151
TSN	1.8225e-155	0.77709	0.472	0.035	3.77696e-151
PRR13	2.78486e-155	0.863346	0.753	0.143	5.77135e-151
LYRM1	3.73365e-155	0.768396	0.501	0.043	7.73762e-151
JUP	5.28129e-155	0.804616	0.405	0.015	1.09449e-150
TIMM10	7.33634e-155	0.934831	0.485	0.043	1.52038e-150
RGS10	9.33375e-155	0.939446	0.43	0.025	1.93433e-150
STMN1	1.66875e-154	0.988056	0.426	0.023	3.45832e-150
TAF12	1.78559e-154	0.852872	0.423	0.023	3.70046e-150
MRPL42	1.81177e-154	0.787647	0.517	0.05	3.7547e-150
FABP5	2.98405e-154	0.881084	0.467	0.036	6.18415e-150
SET	3.08011e-154	1.11001	0.989	0.269	6.38323e-150
MZT1	3.15076e-154	0.885801	0.433	0.025	6.52963e-150
TMEM238	4.38239e-154	0.886157	0.444	0.029	9.08207e-150
TSPO	4.95634e-154	1.02974	0.964	0.22	1.02715e-149
AKR1A1	5.7973e-154	0.770231	0.67	0.107	1.20143e-149
ATP6V0E1	1.01276e-153	0.889866	0.467	0.037	2.09885e-149
TMCO1	1.33385e-153	0.819915	0.524	0.054	2.76428e-149
NCBP2AS2	1.65424e-153	0.781654	0.51	0.049	3.42825e-149
SPNS3	2.83365e-153	0.663319	0.763	0.138	5.87246e-149
MFNG	2.93507e-153	0.869039	0.493	0.046	6.08265e-149
GALNT1	3.5019e-153	0.786834	0.457	0.032	7.25734e-149
PSMB4	3.88732e-153	0.763657	0.702	0.121	8.05608e-149
TCEAL8	3.97349e-153	0.880842	0.422	0.023	8.23465e-149
GLRX3	4.66087e-153	0.77789	0.5	0.046	9.65919e-149
FAU	7.42134e-153	1.18567	1	0.368	1.538e-148
DNAJC3	1.20727e-152	0.750819	0.662	0.106	2.50194e-148
NCF1	1.92031e-152	-3.1224	0.038	0.628	3.97964e-148
GTF2A2	1.98104e-152	0.898231	0.481	0.042	4.10551e-148
ATOX1	2.04214e-152	0.790179	0.659	0.106	4.23214e-148
MSRB2	2.18102e-152	0.916279	0.429	0.026	4.51995e-148
KRT18	2.61409e-152	1.0055	0.337	0	5.41743e-148
MAFF	3.45608e-152	0.784041	0.74	0.135	7.16239e-148
MAPKAPK3	6.00841e-152	0.717145	0.632	0.093	1.24518e-147
RNF181	1.1396e-151	0.896538	0.577	0.077	2.3617e-147
MRPS27	1.61991e-151	0.86466	0.467	0.038	3.35711e-147
CIB1	1.84468e-151	0.709771	0.745	0.136	3.82292e-147
C11orf58	1.87226e-151	0.707288	0.808	0.164	3.88007e-147
JMJD1C	1.96028e-151	-1.41165	0.967	0.869	4.06248e-147
AC093673.1	2.38101e-151	0.854347	0.517	0.056	4.9344e-147
NDUFAF3	2.9285e-151	0.865369	0.552	0.067	6.06902e-147
HSD17B12	4.44514e-151	0.789714	0.496	0.047	9.21211e-147
GAS5	1.69548e-150	1.21464	0.999	0.34	3.51371e-146
DCTPP1	2.21054e-150	0.861181	0.389	0.016	4.58113e-146
MTRF1L	2.65374e-150	0.728258	0.617	0.089	5.49962e-146
KPNA2	3.22129e-150	0.746324	0.79	0.157	6.67579e-146
KLF3	3.82822e-150	0.847212	0.396	0.016	7.93361e-146
MARCKSL1	4.78321e-150	0.8399	0.649	0.105	9.91273e-146
RALY	6.94802e-150	0.745989	0.728	0.137	1.43991e-145
EIF4B	7.15612e-150	0.954762	0.968	0.249	1.48303e-145
RELL1	7.26924e-150	0.843368	0.43	0.026	1.50648e-145
MACROD1	8.68165e-150	0.814933	0.407	0.019	1.79919e-145
C17orf49	1.10945e-149	0.73945	0.695	0.121	2.29922e-145
NDUFC1	1.22267e-149	0.757335	0.571	0.074	2.53386e-145
SMIM19	1.31952e-149	0.798317	0.432	0.027	2.73457e-145
DGUOK	2.45076e-149	0.857422	0.5	0.052	5.07895e-145
CD33	2.93683e-149	0.685192	0.613	0.086	6.08629e-145
MRPL41	3.26368e-149	0.732836	0.67	0.112	6.76364e-145
CAP1	4.02376e-149	0.741936	0.717	0.135	8.33884e-145
RPIA	4.15358e-149	0.828271	0.432	0.028	8.60787e-145
CRK	5.01778e-149	0.779085	0.464	0.036	1.03988e-144
BTG3	5.62729e-149	0.821552	0.552	0.066	1.1662e-144
PSMA3	6.87729e-149	0.731837	0.709	0.128	1.42525e-144
MIF	7.77979e-149	1.19821	0.996	0.313	1.61228e-144
COX7B	8.17051e-149	0.915162	0.948	0.232	1.69326e-144
TYW3	8.23498e-149	0.840814	0.44	0.031	1.70662e-144
BAG1	9.23622e-149	0.746552	0.731	0.138	1.91411e-144
POLR2C	1.6177e-148	0.789381	0.421	0.024	3.35252e-144
NIP7	1.89285e-148	0.780453	0.454	0.033	3.92274e-144
DYNLRB1	2.17587e-148	0.872696	0.528	0.061	4.50928e-144
HAX1	2.94293e-148	0.832323	0.421	0.026	6.09893e-144
DANCR	3.90721e-148	0.854764	0.423	0.026	8.09729e-144
RPL7	4.0522e-148	1.20332	1	0.373	8.39777e-144
KLF4	4.52985e-148	-2.55912	0.37	0.746	9.38767e-144
PKN1	4.77859e-148	0.715077	0.74	0.139	9.90314e-144
IDH3B	5.38955e-148	0.790501	0.563	0.073	1.11693e-143
MRPL52	6.1019e-148	0.853346	0.563	0.075	1.26456e-143
RPS17	7.91772e-148	1.16731	0.999	0.26	1.64087e-143
APMAP	9.86323e-148	0.82323	0.393	0.017	2.04406e-143
TIMM17A	1.58313e-147	0.68755	0.694	0.12	3.28087e-143
ZNHIT3	2.42033e-147	0.846908	0.38	0.014	5.0159e-143
NUDT21	2.64937e-147	0.808449	0.469	0.041	5.49055e-143
CHCHD5	2.98951e-147	0.884526	0.539	0.068	6.19545e-143
VAMP8	3.63587e-147	1.02064	0.948	0.233	7.53499e-143
EMC4	4.42613e-147	0.780928	0.442	0.033	9.17272e-143
RNASEH2B	4.91982e-147	0.595647	0.713	0.128	1.01958e-142
AKR1C3	7.05578e-147	0.815915	0.326	0	1.46224e-142
KRT17	7.05578e-147	0.910515	0.326	0	1.46224e-142
MRPL43	7.53117e-147	0.793904	0.386	0.015	1.56076e-142
HINT2	7.94234e-147	0.870827	0.419	0.026	1.64597e-142
RPL34	9.29296e-147	1.00832	1	0.412	1.92587e-142
RAB8A	1.00102e-146	0.666344	0.581	0.078	2.07452e-142
CDC26	1.13135e-146	0.853582	0.426	0.028	2.34461e-142
MAPK1IP1L	1.2012e-146	0.70962	0.747	0.144	2.48937e-142
PMPCB	1.35574e-146	0.679283	0.595	0.082	2.80964e-142
QDPR	1.43784e-146	0.866531	0.396	0.019	2.97979e-142
BUD23	2.12953e-146	0.687279	0.628	0.095	4.41324e-142
PSMB9	2.2473e-146	0.839984	0.425	0.028	4.65731e-142
HACD4	2.31434e-146	0.745502	0.533	0.062	4.79624e-142
SMYD3	2.78104e-146	0.828978	0.478	0.045	5.76342e-142
NDUFA10	3.42841e-146	0.587139	0.751	0.14	7.10504e-142
EIF2A	3.52578e-146	0.702579	0.734	0.139	7.30683e-142
CTSS	3.62676e-146	0.792061	0.657	0.113	7.5161e-142
HMGN2	5.04585e-146	0.873504	0.918	0.228	1.0457e-141
RALBP1	5.95828e-146	0.751991	0.542	0.066	1.23479e-141
CDK4	6.38594e-146	0.8597	0.46	0.039	1.32342e-141
SERTAD1	6.84133e-146	0.77906	0.811	0.175	1.4178e-141
NIPSNAP2	1.48005e-145	0.726817	0.507	0.053	3.06725e-141
RPA3	1.91273e-145	0.861758	0.379	0.015	3.96395e-141
DARS	2.94127e-145	0.683867	0.623	0.094	6.09549e-141
LRPAP1	3.12547e-145	0.733141	0.695	0.128	6.47723e-141
PLGRKT	3.43096e-145	0.809466	0.354	0.008	7.11032e-141
ZNRF1	4.77929e-145	0.784884	0.404	0.021	9.9046e-141
GTSF1	4.94326e-145	0.825332	0.376	0.014	1.02444e-140
ENSA	5.18991e-145	0.716057	0.791	0.167	1.07556e-140
ZFP36	8.97426e-145	-1.44687	0.923	0.841	1.85983e-140
CUL5	1.03804e-144	0.662011	0.6	0.086	2.15123e-140
ECI1	1.36806e-144	0.812588	0.444	0.035	2.83516e-140
NDUFB7	1.39803e-144	0.748395	0.773	0.161	2.89727e-140
ZNF22	1.4792e-144	0.764261	0.435	0.031	3.06549e-140
ELP5	1.61873e-144	0.786208	0.387	0.017	3.35466e-140
PDLIM1	3.12151e-144	0.696516	0.574	0.077	6.46901e-140
DHRS7	3.13729e-144	0.860513	0.496	0.054	6.50172e-140
LTA4H	3.49095e-144	0.77863	0.556	0.073	7.23465e-140
NDUFA2	4.50074e-144	0.758892	0.72	0.14	9.32734e-140
ABCE1	4.85581e-144	0.755641	0.478	0.046	1.00632e-139
NDUFS6	4.8569e-144	0.72197	0.776	0.162	1.00654e-139
NDUFS3	1.1779e-143	0.738119	0.584	0.084	2.44108e-139
ETFA	1.26448e-143	0.732812	0.462	0.041	2.6205e-139
ATP2B1	1.278e-143	0.715796	0.808	0.169	2.64852e-139
ZKSCAN1	1.38391e-143	0.675864	0.524	0.058	2.86802e-139
RAB22A	1.56778e-143	0.75657	0.471	0.043	3.24907e-139
BLOC1S2	1.83872e-143	0.674368	0.669	0.116	3.81057e-139
MRPL9	2.49582e-143	0.733481	0.501	0.054	5.17234e-139
CD47	5.14733e-143	0.669095	0.815	0.172	1.06673e-138
IFT20	5.96624e-143	0.730397	0.591	0.087	1.23644e-138
C9orf78	6.40423e-143	0.726096	0.652	0.109	1.32721e-138
COPS8	6.81023e-143	0.719004	0.476	0.046	1.41135e-138
APH1A	9.57618e-143	0.793333	0.519	0.063	1.98457e-138
KIF9	1.2463e-142	0.787879	0.408	0.024	2.58282e-138
ACADM	1.63177e-142	0.860851	0.384	0.018	3.38167e-138
CAPZB	2.73032e-142	0.764105	0.714	0.14	5.65832e-138
CHD2	2.87852e-142	-1.77452	0.816	0.822	5.96545e-138
MARCH5	3.44123e-142	0.782375	0.481	0.048	7.1316e-138
SSU72	4.35935e-142	0.700669	0.709	0.135	9.03431e-138
PSMD13	4.95165e-142	0.699163	0.564	0.077	1.02618e-137
AKR7A2	6.67033e-142	0.809746	0.533	0.069	1.38236e-137
RPL36A	7.12153e-142	1.11486	1	0.329	1.47587e-137
DPH5	7.85934e-142	0.830508	0.364	0.012	1.62877e-137
ADH5	8.57901e-142	0.700486	0.481	0.047	1.77791e-137
KRAS	8.73483e-142	0.652767	0.773	0.156	1.81021e-137
MIF4GD	9.14678e-142	0.799866	0.357	0.011	1.89558e-137
KDSR	1.01488e-141	0.811899	0.376	0.016	2.10324e-137
CNST	1.03347e-141	0.729816	0.6	0.091	2.14176e-137
ITPA	1.09585e-141	0.781953	0.514	0.061	2.27104e-137
ANGPT1	1.33891e-141	0.81304	0.358	0.011	2.77476e-137
ZNF581	1.39273e-141	0.746447	0.455	0.039	2.88629e-137
CDK6	1.58602e-141	0.715957	0.825	0.186	3.28687e-137
PPM1G	1.78266e-141	0.734209	0.584	0.085	3.69438e-137
TIMP1	1.8895e-141	0.87615	0.781	0.173	3.91579e-137
ATP5MPL	3.49698e-141	0.890666	0.908	0.211	7.24715e-137
LYPLA1	4.05374e-141	0.688887	0.613	0.095	8.40096e-137
SLC39A3	5.02237e-141	0.853525	0.389	0.021	1.04084e-136
STUB1	8.22303e-141	0.661997	0.652	0.111	1.70414e-136
FAM49B	9.05345e-141	0.674661	0.749	0.151	1.87624e-136
ADRM1	1.55992e-140	0.665492	0.639	0.105	3.23277e-136
TRGC1	5.48803e-140	0.76846	0.487	0.052	1.13734e-135
SRSF11	7.76531e-140	-1.51555	0.946	0.841	1.60928e-135
TXNDC17	1.22242e-139	0.767168	0.411	0.027	2.53334e-135
PAPOLA	1.79283e-139	0.734544	0.891	0.216	3.71546e-135
LITAF	1.9506e-139	0.707677	0.731	0.147	4.04242e-135
TWISTNB	2.50338e-139	0.65649	0.758	0.152	5.188e-135
NRBF2	2.79515e-139	0.803089	0.382	0.018	5.79268e-135
DUSP23	4.55383e-139	0.835962	0.443	0.039	9.43736e-135
FKBP3	5.62866e-139	0.759516	0.467	0.046	1.16648e-134
SMARCB1	5.63002e-139	0.761792	0.454	0.041	1.16677e-134
RPL15	7.11277e-139	0.974342	1	0.502	1.47405e-134
HSBP1	1.24112e-138	0.712246	0.72	0.144	2.57209e-134
MRFAP1	1.39623e-138	0.642408	0.709	0.136	2.89356e-134
PHPT1	1.90242e-138	0.763284	0.848	0.201	3.94257e-134
CDC42EP3	2.02683e-138	-2.58857	0.29	0.704	4.20041e-134
MFF	2.13332e-138	0.726576	0.481	0.05	4.42109e-134
POLR2K	2.18808e-138	0.762616	0.511	0.062	4.53457e-134
MS4A4E	2.90555e-138	-3.0286	0	0.565	6.02146e-134
NDUFA6	4.60739e-138	0.779667	0.475	0.05	9.54835e-134
WDR83OS	9.32618e-138	0.741562	0.918	0.226	1.93276e-133
RPS3	1.00679e-137	1.00947	1	0.491	2.08647e-133
NUDCD2	1.156e-137	0.75355	0.437	0.037	2.3957e-133
SDHC	1.77481e-137	0.751983	0.454	0.043	3.67812e-133
GET3	1.86801e-137	0.725771	0.46	0.043	3.87127e-133
PAIP1	2.01372e-137	0.700474	0.46	0.043	4.17323e-133
PSMF1	2.05598e-137	0.782129	0.412	0.031	4.26081e-133
ATP5IF1	2.79377e-137	0.751283	0.841	0.192	5.78981e-133
FTH1	3.01878e-137	-0.745826	1	0.905	6.25613e-133
CENPV	3.14019e-137	0.807919	0.354	0.012	6.50774e-133
SDHB	3.79041e-137	0.758609	0.486	0.055	7.85524e-133
MCTP2	4.32623e-137	0.715363	0.49	0.053	8.96567e-133
RPS16	4.82853e-137	1.15965	1	0.376	1.00067e-132
HSP90AA1	7.03055e-137	-0.955696	1	0.883	1.45701e-132
HSPB11	7.90223e-137	0.785886	0.425	0.034	1.63766e-132
ICA1	8.76388e-137	0.752582	0.305	0	1.81623e-132
CDCA7L	8.76388e-137	0.75232	0.305	0	1.81623e-132
RAB9A	9.06829e-137	0.660842	0.485	0.053	1.87931e-132
FAM177A1	9.38632e-137	0.714824	0.5	0.057	1.94522e-132
SUPT4H1	1.00044e-136	0.769182	0.487	0.055	2.07332e-132
HDAC1	1.45858e-136	0.785159	0.439	0.039	3.02276e-132
SQOR	1.96922e-136	0.773712	0.366	0.016	4.08102e-132
TMEM170A	2.24065e-136	0.749015	0.532	0.071	4.64352e-132
MRPL37	2.47167e-136	0.773719	0.45	0.042	5.12229e-132
SMARCC1	3.88957e-136	0.669473	0.609	0.098	8.06074e-132
COA4	4.02388e-136	0.774177	0.405	0.028	8.33909e-132
ST3GAL4	4.50343e-136	0.708216	0.457	0.043	9.33291e-132
PRKAR1A	5.53565e-136	0.678338	0.628	0.107	1.14721e-131
TNFSF13B	7.19601e-136	0.794494	0.554	0.082	1.4913e-131
BLOC1S1	7.73467e-136	0.695851	0.716	0.143	1.60293e-131
CEP170	1.32678e-135	0.651684	0.636	0.107	2.74962e-131
NUCKS1	1.33551e-135	0.725335	0.684	0.133	2.76772e-131
EIF4EBP1	2.29067e-135	0.813254	0.468	0.05	4.74719e-131
TRAPPC4	2.60607e-135	0.677854	0.51	0.062	5.40082e-131
EIF4A1	2.75684e-135	-0.858221	0.999	0.884	5.71328e-131
METTL5	3.04129e-135	0.772324	0.372	0.018	6.30276e-131
RPS21	9.98097e-135	1.04738	1	0.36	2.06846e-130
NASP	1.03668e-134	0.672826	0.719	0.142	2.14841e-130
ATP5ME	1.2046e-134	0.810206	0.904	0.212	2.49641e-130
NDUFB3	1.34833e-134	0.8232	0.394	0.027	2.79427e-130
TMED4	1.53204e-134	0.739165	0.614	0.106	3.17499e-130
ABT1	1.86563e-134	0.718187	0.421	0.033	3.86634e-130
DHPS	4.09271e-134	0.749985	0.419	0.033	8.48174e-130
ARL2BP	4.21226e-134	0.728776	0.45	0.043	8.72948e-130
ZDHHC24	9.82021e-134	0.733392	0.444	0.042	2.03514e-129
ADGRE2	1.08442e-133	0.74042	0.472	0.05	2.24734e-129
AL592183.1	1.53161e-133	0.848878	0.403	0.029	3.17411e-129
IP6K2	1.6249e-133	0.530575	0.779	0.162	3.36745e-129
WDR61	2.06772e-133	0.731794	0.412	0.032	4.28515e-129
SELENOW	3.29678e-133	0.793488	0.425	0.037	6.83224e-129
DBI	4.00829e-133	0.700894	0.83	0.189	8.30679e-129
SAMHD1	5.76529e-133	-2.76444	0.047	0.584	1.1948e-128
CCNY	6.0362e-133	0.782987	0.423	0.035	1.25094e-128
CLIC1	6.43916e-133	1.16271	1	0.338	1.33445e-128
EDF1	7.52479e-133	0.898145	0.976	0.279	1.55944e-128
RPL24	8.46799e-133	1.05454	1	0.424	1.75491e-128
YIPF3	8.65533e-133	0.736387	0.416	0.033	1.79373e-128
SLC27A5	8.87105e-133	0.735762	0.297	0	1.83844e-128
OSER1	2.06123e-132	0.552918	0.72	0.143	4.2717e-128
EAPP	2.10473e-132	0.663021	0.588	0.094	4.36184e-128
PSMA6	2.15357e-132	0.622213	0.825	0.193	4.46306e-128
TCEA1	2.27888e-132	0.567245	0.714	0.141	4.72276e-128
NT5C3A	2.45286e-132	0.722915	0.398	0.027	5.08332e-128
AK3	2.46253e-132	0.731275	0.433	0.039	5.10334e-128
RBM7	2.69521e-132	0.605345	0.642	0.115	5.58555e-128
DUT	3.20056e-132	0.622596	0.79	0.172	6.63285e-128
TMED10	6.01611e-132	0.666809	0.648	0.12	1.24678e-127
LAMP1	6.62244e-132	0.676624	0.745	0.161	1.37243e-127
NOA1	7.08709e-132	0.769369	0.355	0.016	1.46873e-127
MAP2K2	7.47221e-132	0.563302	0.791	0.176	1.54854e-127
COMMD8	9.02955e-132	0.796669	0.386	0.025	1.87128e-127
RHOH	9.39197e-132	0.853506	0.331	0.009	1.94639e-127
ZNF433-AS1	9.58625e-132	0.573618	0.656	0.12	1.98665e-127
ZFAND5	1.10377e-131	-1.79581	0.802	0.801	2.28744e-127
MRPL15	1.27701e-131	0.743088	0.34	0.011	2.64647e-127
NAXE	1.74044e-131	0.815927	0.457	0.05	3.60689e-127
MCFD2	1.9465e-131	0.674111	0.494	0.06	4.03392e-127
TNFAIP2	2.13001e-131	-2.78884	0.288	0.693	4.41423e-127
LPCAT2	2.16325e-131	0.74475	0.436	0.041	4.48312e-127
CHCHD3	2.33261e-131	0.683704	0.435	0.04	4.83411e-127
TRAM1	2.42547e-131	0.61448	0.758	0.161	5.02655e-127
SNX17	2.52835e-131	0.734778	0.405	0.03	5.23975e-127
ERGIC1	3.13571e-131	0.742011	0.43	0.04	6.49845e-127
PTS	3.47592e-131	0.695276	0.493	0.061	7.2035e-127
DCTN2	3.82528e-131	0.69985	0.464	0.05	7.9275e-127
DHRS4L2	4.72233e-131	0.792172	0.382	0.024	9.78656e-127
CD59	5.68714e-131	0.716611	0.397	0.028	1.1786e-126
KRR1	8.44695e-131	0.631111	0.783	0.175	1.75055e-126
NTNG2	8.82805e-131	0.728722	0.345	0.013	1.82952e-126
SH3GLB1	9.37967e-131	0.600454	0.733	0.154	1.94384e-126
OSGIN2	1.13762e-130	0.541134	0.684	0.129	2.35759e-126
TMX2	1.97245e-130	0.762406	0.375	0.022	4.08771e-126
NFU1	2.19545e-130	0.743028	0.357	0.017	4.54985e-126
PPA2	2.83049e-130	0.658416	0.472	0.054	5.8659e-126
NELFE	3.06902e-130	0.715023	0.468	0.053	6.36024e-126
ATP1B3	3.89276e-130	0.631044	0.563	0.086	8.06736e-126
H2AFX	4.14106e-130	0.712633	0.536	0.077	8.58194e-126
PRXL2C	4.67181e-130	0.654207	0.685	0.137	9.68185e-126
KIAA1143	5.53194e-130	0.673343	0.403	0.031	1.14644e-125
METTL9	5.5414e-130	0.714715	0.677	0.134	1.1484e-125
PCLAF	7.74551e-130	0.961256	0.379	0.025	1.60518e-125
PRKRA	9.42051e-130	0.650025	0.472	0.053	1.95231e-125
MTDH	1.57831e-129	0.725989	0.943	0.254	3.2709e-125
SSR1	1.63332e-129	0.635123	0.561	0.087	3.38489e-125
FKBP4	2.92089e-129	0.743508	0.368	0.02	6.05325e-125
SERBP1	3.00161e-129	0.725534	0.905	0.239	6.22054e-125
HNRNPR	3.24135e-129	0.603408	0.701	0.141	6.71737e-125
ECSIT	4.67948e-129	0.713077	0.39	0.028	9.69775e-125
TSPYL1	4.84697e-129	0.658212	0.634	0.118	1.00449e-124
TMEM35B	7.77099e-129	0.723344	0.338	0.013	1.61046e-124
GAR1	1.28925e-128	0.723844	0.372	0.023	2.67185e-124
BZW2	1.45358e-128	0.62311	0.755	0.168	3.01239e-124
HIST1H4C	1.7357e-128	0.605418	0.585	0.095	3.59707e-124
PPIH	1.74481e-128	0.746662	0.412	0.035	3.61593e-124
COPS5	2.10133e-128	0.67721	0.444	0.046	4.3548e-124
XRN2	2.32918e-128	0.558621	0.714	0.149	4.827e-124
CDS2	7.01109e-128	0.615611	0.501	0.064	1.45298e-123
SERPINB6	7.73836e-128	0.512091	0.716	0.147	1.6037e-123
NKAPD1	1.02404e-127	0.748148	0.39	0.029	2.12223e-123
BNIP1	1.09537e-127	0.631013	0.462	0.051	2.27005e-123
PEF1	1.12392e-127	0.730821	0.382	0.026	2.32921e-123
SMIM3	1.95457e-127	0.587352	0.694	0.14	4.05065e-123
PPP6C	2.11085e-127	0.694407	0.435	0.042	4.37453e-123
EBP	2.12743e-127	0.66825	0.483	0.061	4.40889e-123
TESC	2.60831e-127	0.746013	0.521	0.076	5.40547e-123
TSTA3	3.0386e-127	0.766428	0.429	0.043	6.2972e-123
SEC61B	3.44136e-127	0.815104	0.947	0.259	7.13188e-123
TAF10	3.63321e-127	0.579745	0.783	0.18	7.52947e-123
CALM2	4.14139e-127	0.691331	0.877	0.222	8.58261e-123
GPSM1	5.02186e-127	0.704942	0.344	0.014	1.04073e-122
PSMG1	5.52746e-127	0.724733	0.34	0.014	1.14551e-122
EIF6	5.66658e-127	0.65432	0.588	0.1	1.17434e-122
SAP30	7.25194e-127	0.824835	0.433	0.045	1.50289e-122
CFP	1.01171e-126	0.752627	0.511	0.07	2.09667e-122
C18orf32	1.19435e-126	0.726909	0.457	0.051	2.47518e-122
UTP11	1.74213e-126	0.658113	0.467	0.055	3.61038e-122
TIPRL	3.14663e-126	0.653356	0.422	0.039	6.52107e-122
UBE2H	8.25237e-126	0.533178	0.664	0.127	1.71022e-121
ZNF430	1.13392e-125	0.690703	0.414	0.038	2.34994e-121
ORMDL1	1.23759e-125	0.568577	0.641	0.119	2.56478e-121
NDUFA1	1.26541e-125	0.713574	0.815	0.194	2.62243e-121
MIR4435-2HG	1.39746e-125	0.682194	0.389	0.028	2.8961e-121
CDIP1	1.75133e-125	0.718821	0.281	0	3.62946e-121
TMEM208	1.78866e-125	0.693491	0.407	0.035	3.70683e-121
PPIG	1.92932e-125	0.541422	0.695	0.14	3.99832e-121
SEC11C	3.40192e-125	0.726272	0.372	0.025	7.05015e-121
DRAM2	3.59372e-125	0.704691	0.474	0.06	7.44763e-121
CHP1	4.63949e-125	0.776311	0.568	0.098	9.61489e-121
MRPS2	6.31013e-125	0.59621	0.457	0.05	1.30771e-120
CMC2	1.1528e-124	0.673641	0.525	0.077	2.38905e-120
MAPRE2	2.14364e-124	0.751472	0.322	0.011	4.44247e-120
NXT1	2.47356e-124	0.767397	0.539	0.085	5.12621e-120
EIF2D	5.31992e-124	0.710648	0.401	0.035	1.1025e-119
TMEM41B	7.63643e-124	0.630797	0.539	0.082	1.58257e-119
IFI27L2	7.70837e-124	0.762734	0.597	0.108	1.59748e-119
PPP1R15B	8.30677e-124	-2.07591	0.634	0.765	1.7215e-119
SLC39A8	1.28447e-123	0.722443	0.33	0.013	2.66193e-119
TMEM242	1.28594e-123	0.660588	0.414	0.039	2.66499e-119
CCNH	1.46015e-123	0.688227	0.564	0.095	3.02602e-119
GMPS	1.47407e-123	0.714154	0.405	0.037	3.05485e-119
DEK	1.54945e-123	0.568339	0.733	0.157	3.21108e-119
IFI6	1.56326e-123	0.789125	0.355	0.021	3.2397e-119
BCL7C	2.42975e-123	0.791663	0.464	0.06	5.03542e-119
ETFRF1	2.50801e-123	0.691335	0.355	0.021	5.19759e-119
TMA7	3.6429e-123	0.958706	0.976	0.267	7.54954e-119
TNFRSF14	4.12076e-123	0.693907	0.333	0.014	8.53986e-119
PSMD11	4.81827e-123	0.562259	0.636	0.121	9.98538e-119
GAS6-AS1	4.97255e-123	0.59149	0.49	0.064	1.03051e-118
RCN1	6.21046e-123	0.636724	0.387	0.03	1.28706e-118
BORCS7	6.59104e-123	0.660826	0.471	0.058	1.36593e-118
ISCU	6.64044e-123	0.495997	0.603	0.106	1.37617e-118
SF3B4	6.83709e-123	0.673747	0.443	0.049	1.41692e-118
TOMM40	8.90022e-123	0.628993	0.462	0.056	1.84448e-118
MPLKIP	1.5278e-122	0.707491	0.396	0.034	3.16622e-118
AATF	1.61522e-122	0.657034	0.416	0.041	3.34737e-118
ADI1	2.21682e-122	0.720232	0.414	0.04	4.59414e-118
UBE2N	2.31209e-122	0.611038	0.829	0.204	4.79157e-118
SPTBN1	3.0191e-122	0.671068	0.386	0.03	6.25678e-118
MRPL23	3.22521e-122	0.634274	0.635	0.124	6.68392e-118
FXR1	4.10062e-122	0.595024	0.859	0.213	8.49811e-118
SND1	5.33272e-122	0.734675	0.458	0.056	1.10515e-117
TMEM70	5.71006e-122	0.672265	0.396	0.034	1.18335e-117
UBA2	6.78031e-122	0.559972	0.575	0.098	1.40515e-117
RPL32	7.58355e-122	0.876123	1	0.503	1.57161e-117
F11R	8.48671e-122	0.734099	0.322	0.012	1.75879e-117
CMBL	1.28605e-121	0.718792	0.333	0.016	2.6652e-117
ZNHIT1	1.40241e-121	0.545883	0.731	0.163	2.90635e-117
DUSP14	1.57352e-121	0.706802	0.273	0	3.26097e-117
ARL6IP1	2.33812e-121	0.719008	0.912	0.243	4.84552e-117
THYN1	2.52807e-121	0.661492	0.396	0.035	5.23917e-117
CDC42SE2	2.65261e-121	0.530641	0.681	0.14	5.49726e-117
GOLPH3	2.76244e-121	0.639038	0.476	0.062	5.72488e-117
TSFM	2.80189e-121	0.66757	0.326	0.013	5.80663e-117
LSM14A	2.80745e-121	0.687516	0.482	0.066	5.81816e-117
NUDT16L1	2.86926e-121	0.661649	0.408	0.038	5.94626e-117
NDUFB6	2.98507e-121	0.716238	0.323	0.013	6.18626e-117
HAUS4	3.07177e-121	0.681957	0.405	0.038	6.36593e-117
POLR3GL	3.18209e-121	0.74065	0.39	0.034	6.59456e-117
SDSL	4.95482e-121	0.6842	0.361	0.024	1.02684e-116
CYTIP	5.87257e-121	0.579904	0.535	0.081	1.21703e-116
C22orf39	6.80398e-121	0.596607	0.481	0.064	1.41006e-116
PPP1CA	7.51443e-121	0.601073	0.682	0.14	1.55729e-116
MRPS12	9.32023e-121	0.700621	0.373	0.028	1.93152e-116
TEX264	9.9665e-121	0.705344	0.416	0.043	2.06546e-116
GUK1	1.05138e-120	0.565475	0.89	0.235	2.17888e-116
MTF2	1.21068e-120	0.605882	0.55	0.09	2.50902e-116
COPS2	1.3885e-120	0.528928	0.827	0.205	2.87753e-116
TBXAS1	1.7965e-120	0.661267	0.384	0.031	3.72308e-116
UBE2M	1.84749e-120	0.502111	0.859	0.216	3.82874e-116
NFATC1	2.09225e-120	0.724568	0.34	0.018	4.33598e-116
PTAFR	2.88257e-120	-2.72303	0.026	0.535	5.97384e-116
IFT52	3.0249e-120	0.700548	0.336	0.017	6.26881e-116
SH2D1A	3.24104e-120	0.6948	0.27	0	6.71672e-116
ATP5F1E	3.4219e-120	0.945509	0.994	0.265	7.09155e-116
GLRX	4.24795e-120	0.72067	0.355	0.024	8.80346e-116
DMAC1	4.34911e-120	0.751378	0.355	0.024	9.01309e-116
THUMPD3-AS1	5.64863e-120	0.546987	0.831	0.206	1.17062e-115
CCNDBP1	5.85733e-120	0.65644	0.447	0.053	1.21387e-115
TPST2	1.14087e-119	0.716773	0.345	0.02	2.36435e-115
CERS6	1.15068e-119	0.602679	0.475	0.062	2.38468e-115
DEDD2	1.18014e-119	0.598932	0.564	0.095	2.44572e-115
RAB5IF	1.35967e-119	0.635353	0.932	0.254	2.81779e-115
AGO2	1.791e-119	0.652491	0.404	0.038	3.71167e-115
SNHG32	1.90347e-119	0.719302	0.901	0.238	3.94474e-115
DCTN6	1.96966e-119	0.584873	0.476	0.062	4.08193e-115
RAB34	2.50272e-119	0.653765	0.507	0.077	5.18663e-115
CHPT1	2.70107e-119	0.660277	0.4	0.037	5.5977e-115
ACBD6	2.922e-119	0.636997	0.401	0.038	6.05555e-115
TRAPPC2B	3.30319e-119	0.680826	0.316	0.012	6.84553e-115
MED21	4.02908e-119	0.580144	0.522	0.079	8.34987e-115
ALG5	5.47377e-119	0.62976	0.348	0.021	1.13439e-114
METRNL	6.50948e-119	0.529171	0.774	0.176	1.34902e-114
MDFI	6.6449e-119	0.704125	0.267	0	1.37709e-114
TSPOAP1	7.07852e-119	0.56368	0.483	0.063	1.46695e-114
TAX1BP1	8.00094e-119	0.475471	0.673	0.137	1.65812e-114
RALA	1.05295e-118	0.683686	0.348	0.021	2.18214e-114
CSNK2A2	1.11524e-118	0.648976	0.39	0.035	2.31121e-114
SEPHS2	1.38433e-118	0.64685	0.418	0.043	2.86889e-114
JAGN1	1.86983e-118	0.723987	0.313	0.012	3.87504e-114
M6PR	2.31141e-118	0.536727	0.617	0.116	4.79017e-114
PSMG4	2.5074e-118	0.670942	0.325	0.015	5.19633e-114
TFPI	3.00358e-118	0.723953	0.266	0	6.22462e-114
URM1	3.37629e-118	0.657044	0.4	0.038	6.99702e-114
BID	4.58879e-118	0.632911	0.486	0.07	9.50981e-114
TNFRSF1A	5.8743e-118	0.608448	0.428	0.047	1.21739e-113
STT3B	9.70972e-118	0.464418	0.696	0.149	2.01224e-113
UROD	1.03394e-117	0.656254	0.379	0.032	2.14273e-113
AC007952.4	1.09901e-117	-2.71954	0.195	0.626	2.27758e-113
S100Z	1.15526e-117	0.750581	0.366	0.028	2.39417e-113
KCNQ1OT1	1.65263e-117	0.644991	0.568	0.098	3.42491e-113
LCMT1	1.78711e-117	0.648563	0.322	0.014	3.70361e-113
HDHD2	1.93451e-117	0.676906	0.331	0.017	4.00908e-113
ATIC	2.06817e-117	0.715697	0.362	0.027	4.28608e-113
STAT5A	2.07637e-117	0.580622	0.454	0.056	4.30307e-113
PLPP5	2.4275e-117	0.623284	0.38	0.032	5.03076e-113
VPS28	2.65123e-117	0.502505	0.786	0.189	5.49441e-113
PSMD4	3.56894e-117	0.684001	0.51	0.079	7.39628e-113
DNTTIP2	4.76873e-117	0.526221	0.799	0.192	9.88272e-113
BIN1	6.11563e-117	0.68966	0.263	0	1.2674e-112
CIAO2B	6.47664e-117	0.670794	0.531	0.09	1.34222e-112
SPAG7	6.76532e-117	0.555988	0.478	0.065	1.40205e-112
REST	7.26639e-117	0.565953	0.482	0.066	1.50589e-112
MRPS16	9.63379e-117	0.697004	0.393	0.038	1.99651e-112
RGS19	9.87432e-117	0.766676	0.404	0.043	2.04635e-112
ANXA11	1.42995e-116	0.52773	0.687	0.15	2.96343e-112
DDRGK1	1.4835e-116	0.656785	0.435	0.052	3.07441e-112
SDE2	1.75626e-116	0.531488	0.726	0.162	3.63968e-112
DEAF1	1.81396e-116	0.602456	0.382	0.033	3.75925e-112
SUCLG2	1.96859e-116	0.705441	0.366	0.03	4.07971e-112
GPX7	2.75482e-116	0.640526	0.262	0	5.70909e-112
HOMER3	2.93849e-116	0.513135	0.673	0.14	6.08973e-112
IFI16	5.4329e-116	0.644166	0.373	0.031	1.12591e-111
RPL18A	6.27457e-116	-0.612085	1	0.918	1.30034e-111
RPS28	6.75746e-116	0.966495	1	0.386	1.40042e-111
AGPAT2	8.04089e-116	0.598748	0.455	0.059	1.66639e-111
MRPS30	8.64452e-116	0.605022	0.432	0.05	1.79149e-111
HIKESHI	9.09092e-116	0.704205	0.33	0.019	1.884e-111
PLEK	9.18406e-116	-1.4485	0.893	0.791	1.9033e-111
DCAF7	9.52232e-116	0.64689	0.405	0.042	1.9734e-111
WDR33	1.08758e-115	0.540634	0.49	0.07	2.25391e-111
USE1	1.11773e-115	0.553423	0.499	0.074	2.31639e-111
TARS	1.21722e-115	0.551418	0.474	0.065	2.52258e-111
RPLP1	1.72033e-115	0.676761	1	0.531	3.56521e-111
BRAF	2.54884e-115	0.499946	0.519	0.08	5.28221e-111
NFE2L2	2.62975e-115	0.582099	0.472	0.064	5.44989e-111
RAB7A	4.93837e-115	0.565233	0.564	0.102	1.02343e-110
MMP2	5.57058e-115	0.700032	0.259	0	1.15445e-110
SLC2A4RG	6.1221e-115	0.628	0.453	0.059	1.26874e-110
KPNA6	6.3883e-115	0.581196	0.519	0.082	1.32391e-110
HLA-B	6.70843e-115	-0.724811	1	0.864	1.39026e-110
MRPL57	7.09934e-115	0.55101	0.759	0.182	1.47127e-110
GALK1	9.9264e-115	0.646661	0.361	0.028	2.05715e-110
TPGS1	1.3157e-114	0.54641	0.504	0.078	2.72666e-110
STAB1	1.34997e-114	0.359597	0.71	0.149	2.79769e-110
COPE	1.79562e-114	0.622916	0.897	0.243	3.72125e-110
RMND5A	1.97268e-114	0.540789	0.465	0.063	4.08819e-110
RPS26	2.21613e-114	0.999368	1	0.381	4.59271e-110
KPNB1	2.37607e-114	0.529015	0.717	0.161	4.92418e-110
TSSC4	3.46137e-114	0.553877	0.455	0.06	7.17335e-110
CALM3	3.49346e-114	0.634017	0.667	0.148	7.23985e-110
QARS	3.9452e-114	0.460956	0.63	0.124	8.17602e-110
TMOD3	4.08508e-114	0.600026	0.447	0.057	8.46592e-110
KPNA3	4.10739e-114	0.507033	0.475	0.065	8.51216e-110
MRPL40	5.59301e-114	0.684502	0.33	0.02	1.1591e-109
PARL	5.90571e-114	0.664647	0.483	0.073	1.2239e-109
PTPMT1	6.14383e-114	0.644575	0.401	0.042	1.27325e-109
SPATA2	6.6967e-114	0.529685	0.464	0.063	1.38782e-109
DERL2	8.54952e-114	0.575204	0.412	0.045	1.7718e-109
MAPKAPK5-AS1	9.77868e-114	0.592539	0.407	0.043	2.02653e-109
ANTKMT	1.00503e-113	0.734911	0.423	0.053	2.08283e-109
SRPK1	1.90957e-113	0.571858	0.474	0.066	3.9574e-109
ATG101	2.09379e-113	0.640513	0.432	0.053	4.33916e-109
DGCR6L	2.15165e-113	0.715343	0.435	0.056	4.45909e-109
ELOB	2.41195e-113	0.771597	0.974	0.283	4.99853e-109
AL035446.1	3.17248e-113	0.708013	0.309	0.014	6.57465e-109
RPL10	3.65344e-113	0.841066	1	0.539	7.57138e-109
NUCB1	3.79979e-113	0.669167	0.511	0.083	7.87469e-109
BIK	4.54649e-113	0.553579	0.423	0.049	9.42214e-109
CACUL1	5.36585e-113	0.544178	0.508	0.08	1.11202e-108
UBE2E3	5.37469e-113	0.48751	0.565	0.101	1.11385e-108
TOP1	8.2474e-113	0.463912	0.792	0.19	1.70919e-108
MED1	9.44321e-113	0.650997	0.364	0.03	1.95701e-108
ZNF92	1.16397e-112	0.638733	0.341	0.023	2.41221e-108
HEXA	1.33233e-112	0.548888	0.79	0.198	2.76111e-108
TMEM248	1.35791e-112	0.575817	0.4	0.042	2.81413e-108
ZNF529	1.4228e-112	0.60315	0.366	0.031	2.94861e-108
ELMO1	1.42298e-112	0.4996	0.49	0.072	2.94899e-108
MRPS22	1.88979e-112	0.630892	0.336	0.021	3.9164e-108
TPGS2	2.04746e-112	0.635501	0.365	0.031	4.24317e-108
ZG16B	2.24669e-112	0.658691	0.253	0	4.65605e-108
MRPS18B	3.55382e-112	0.664629	0.299	0.012	7.36494e-108
MAF1	4.86118e-112	0.612489	0.513	0.086	1.00743e-107
KARS	6.47974e-112	0.612807	0.485	0.075	1.34286e-107
LCOR	6.52023e-112	0.476193	0.649	0.134	1.35125e-107
COX20	6.60137e-112	0.565673	0.578	0.108	1.36807e-107
PDE4B	9.37375e-112	0.627009	0.336	0.021	1.94262e-107
SRD5A3	1.00395e-111	0.644323	0.252	0	2.08059e-107
PLPPR3	1.34052e-111	0.461296	0.742	0.171	2.77809e-107
ELMSAN1	1.42768e-111	0.471483	0.79	0.194	2.95872e-107
UBE2A	2.11379e-111	0.478041	0.623	0.127	4.38062e-107
PLAGL1	3.07602e-111	0.549503	0.418	0.048	6.37475e-107
HTRA3	3.647e-111	0.667783	0.337	0.023	7.55805e-107
COMMD9	4.4548e-111	0.574842	0.429	0.054	9.23212e-107
PDCD7	4.65063e-111	0.637258	0.39	0.04	9.63797e-107
RHOA	5.2469e-111	0.734711	0.958	0.293	1.08737e-106
RTF1	6.27741e-111	0.446826	0.841	0.216	1.30093e-106
GDE1	7.7904e-111	0.644701	0.364	0.032	1.61448e-106
SERINC3	8.10061e-111	0.583572	0.529	0.091	1.67877e-106
RPL11	8.7336e-111	0.838862	1	0.514	1.80995e-106
PSMC4	1.69045e-110	0.51554	0.453	0.062	3.50329e-106
MRPL12	1.83381e-110	0.558841	0.496	0.079	3.80039e-106
AKIRIN2	1.88608e-110	0.503716	0.798	0.2	3.90872e-106
NDUFA9	1.9946e-110	0.588333	0.375	0.035	4.1336e-106
GIPC1	1.99786e-110	0.650337	0.249	0	4.14037e-106
GLUL	2.3732e-110	0.623954	0.908	0.26	4.91822e-106
PHF5A	2.87199e-110	0.670919	0.322	0.02	5.95191e-106
SAR1A	2.89376e-110	0.477115	0.719	0.167	5.99703e-106
TMEM11	3.0962e-110	0.530242	0.444	0.059	6.41657e-106
MIEN1	3.82576e-110	0.650643	0.429	0.056	7.9285e-106
TMEM183A	5.39746e-110	0.564801	0.504	0.083	1.11857e-105
SEC63	6.18817e-110	0.515439	0.572	0.108	1.28244e-105
C12orf76	6.38073e-110	0.666349	0.313	0.017	1.32234e-105
MAP7	6.55129e-110	0.634236	0.276	0.006	1.35769e-105
RNASEH1	6.93523e-110	0.599996	0.364	0.032	1.43726e-105
KPNA4	1.02044e-109	0.457044	0.737	0.174	2.11476e-105
MCRIP2	1.31132e-109	0.477673	0.571	0.109	2.71758e-105
CLK1	2.0112e-109	-1.49899	0.904	0.787	4.16801e-105
CSTA	2.08109e-109	0.737046	0.773	0.191	4.31285e-105
PLSCR1	2.13593e-109	0.643239	0.313	0.017	4.42651e-105
HAT1	2.22655e-109	0.50193	0.609	0.123	4.61431e-105
ZNF222	2.46054e-109	0.617599	0.274	0.006	5.09923e-105
PSMD12	3.36038e-109	0.458613	0.758	0.184	6.96405e-105
EXOSC6	3.73762e-109	0.429286	0.649	0.138	7.74584e-105
FAM174C	3.85761e-109	0.680304	0.39	0.043	7.99451e-105
TCEAL9	3.95767e-109	0.646783	0.247	0	8.20187e-105
HIF1A	5.20024e-109	-1.79943	0.772	0.765	1.0777e-104
NSFL1C	5.72955e-109	0.434671	0.553	0.099	1.18739e-104
CEP57	6.83323e-109	0.602939	0.383	0.04	1.41612e-104
PPDPF	8.12709e-109	0.672965	0.929	0.27	1.68426e-104
MAPK1	8.80087e-109	0.523559	0.454	0.064	1.82389e-104
ACTG1	9.32889e-109	1.021	1	0.392	1.93332e-104
NIPSNAP1	1.34031e-108	0.622834	0.287	0.01	2.77766e-104
IMPA2	1.39143e-108	0.66136	0.325	0.022	2.88359e-104
MBOAT7	1.51781e-108	0.421762	0.719	0.171	3.14552e-104
SLC25A11	1.6804e-108	0.624796	0.369	0.036	3.48246e-104
ROMO1	2.20497e-108	0.578091	0.652	0.146	4.56958e-104
STOM	2.90898e-108	0.651917	0.283	0.01	6.02857e-104
PAFAH1B1	3.33163e-108	0.479193	0.511	0.084	6.90446e-104
TMEM87A	3.93974e-108	0.547467	0.425	0.053	8.16471e-104
HOTAIRM1	4.19984e-108	0.64997	0.525	0.094	8.70374e-104
ZDHHC4	5.49953e-108	0.608217	0.309	0.017	1.13972e-103
UQCC2	5.57144e-108	0.659316	0.422	0.055	1.15462e-103
LIMS1	6.20047e-108	0.546109	0.545	0.1	1.28499e-103
MPP1	6.24422e-108	0.51568	0.476	0.072	1.29405e-103
PIAS2	6.47326e-108	0.600943	0.326	0.021	1.34152e-103
GID8	6.99204e-108	0.541275	0.538	0.097	1.44903e-103
STX8	7.99889e-108	0.693957	0.358	0.033	1.65769e-103
RPS19	1.14679e-107	0.882025	1	0.476	2.37661e-103
TAF1D	1.56362e-107	0.549796	0.921	0.263	3.24044e-103
MARCH7	1.68369e-107	0.557473	0.386	0.04	3.48928e-103
KYAT3	1.7011e-107	0.63568	0.284	0.01	3.52537e-103
LAMTOR3	2.51942e-107	0.522823	0.503	0.084	5.22124e-103
CIR1	3.19433e-107	0.414166	0.719	0.168	6.61993e-103
RNF130	4.7639e-107	0.603947	0.592	0.123	9.87271e-103
C12orf57	5.02913e-107	0.463652	0.838	0.221	1.04224e-102
ZPR1	5.31332e-107	0.612589	0.389	0.044	1.10113e-102
SVIP	6.46313e-107	0.614212	0.361	0.034	1.33942e-102
PHTF1	7.03462e-107	0.507886	0.471	0.071	1.45786e-102
ACAT1	7.33729e-107	0.608676	0.35	0.03	1.52058e-102
AL118516.1	8.22175e-107	0.62302	0.44	0.062	1.70388e-102
MED10	8.22768e-107	0.5602	0.423	0.055	1.7051e-102
AC092338.3	8.43135e-107	0.663787	0.281	0.01	1.74731e-102
TMEM134	8.66674e-107	0.622984	0.319	0.021	1.79609e-102
SELENOT	8.96351e-107	0.527713	0.606	0.126	1.8576e-102
RPLP2	1.0636e-106	0.930626	1	0.368	2.20421e-102
ZNF44	1.06403e-106	0.568499	0.421	0.054	2.2051e-102
C1orf122	1.09141e-106	0.668102	0.401	0.049	2.26184e-102
ZNF24	1.10996e-106	0.529329	0.433	0.057	2.30028e-102
NDUFA8	1.16529e-106	0.660192	0.301	0.016	2.41494e-102
RNF187	1.34793e-106	0.545714	0.43	0.057	2.79345e-102
LZIC	1.38793e-106	0.635974	0.306	0.017	2.87634e-102
GFER	1.43705e-106	0.598704	0.355	0.032	2.97814e-102
FRG1	1.51626e-106	0.571104	0.458	0.069	3.14229e-102
TYROBP	1.52508e-106	0.682266	0.858	0.224	3.16058e-102
ANPEP	1.53202e-106	0.654147	0.241	0	3.17496e-102
ZFAND2B	1.79422e-106	0.543636	0.442	0.061	3.71834e-102
TXNDC9	2.90304e-106	0.605213	0.279	0.01	6.01626e-102
SAMD4B	2.92556e-106	0.461824	0.642	0.14	6.06293e-102
CSNK2A1	3.6607e-106	0.45529	0.575	0.114	7.58643e-102
WASHC3	3.68839e-106	0.659344	0.319	0.021	7.64383e-102
SUSD6	3.82229e-106	0.507718	0.429	0.056	7.9213e-102
MRPL44	4.86875e-106	0.518422	0.492	0.081	1.009e-101
A1BG	5.06406e-106	0.679232	0.448	0.068	1.04948e-101
RAD23A	5.35075e-106	0.452304	0.685	0.16	1.10889e-101
RBM33	5.44124e-106	0.385312	0.624	0.131	1.12764e-101
RBM8A	6.06799e-106	0.55508	0.909	0.266	1.25753e-101
LIPA	6.51012e-106	0.651569	0.276	0.009	1.34916e-101
TMEM220	6.77627e-106	0.631206	0.24	0	1.40431e-101
REX1BD	1.02448e-105	0.499753	0.826	0.22	2.12313e-101
CTNNB1	1.06837e-105	-1.33011	0.936	0.789	2.2141e-101
SCAND1	2.04128e-105	0.541913	0.882	0.244	4.23035e-101
PUM1	2.16851e-105	0.37327	0.772	0.191	4.49401e-101
TSR3	2.68603e-105	0.615455	0.333	0.026	5.56653e-101
OGFOD3	2.74923e-105	0.62382	0.291	0.013	5.6975e-101
ZNF254	3.9193e-105	0.543586	0.355	0.032	8.12235e-101
CTDNEP1	4.01171e-105	0.502587	0.593	0.124	8.31388e-101
PMVK	4.53564e-105	0.651914	0.29	0.013	9.39967e-101
UNC119B	4.60594e-105	0.610171	0.273	0.009	9.54535e-101
RPS24	4.90969e-105	0.775206	1	0.519	1.01748e-100
HES1	5.98842e-105	0.823829	0.274	0.009	1.24104e-100
CRIPT	7.87168e-105	0.491368	0.507	0.088	1.63133e-100
STAU1	7.9152e-105	0.604992	0.383	0.042	1.64035e-100
MRPL38	1.16614e-104	0.479354	0.439	0.062	2.4167e-100
AHSA1	1.20168e-104	0.602098	0.482	0.08	2.49036e-100
SNHG25	1.34315e-104	-2.05047	0.604	0.722	2.78355e-100
CSNK1D	1.38181e-104	0.394566	0.642	0.138	2.86366e-100
IMP3	1.39524e-104	0.592844	0.331	0.026	2.8915e-100
CENPX	1.46184e-104	0.59629	0.382	0.043	3.02953e-100
TBCC	1.60358e-104	0.588475	0.407	0.051	3.32326e-100
SFT2D1	1.81884e-104	0.672246	0.359	0.036	3.76937e-100
ERVK3-1	1.86683e-104	0.521066	0.384	0.043	3.86881e-100
CCNI	2.19353e-104	0.902022	0.994	0.353	4.54587e-100
BIN2	2.25359e-104	0.62321	0.393	0.046	4.67034e-100
SBNO1	2.34164e-104	0.403551	0.673	0.154	4.85282e-100
EXOSC5	2.67623e-104	0.645236	0.308	0.02	5.54623e-100
GNAI2	3.15242e-104	0.70008	0.948	0.282	6.53307e-100
CIAO2A	3.55833e-104	0.621174	0.29	0.014	7.37429e-100
THRAP3	5.26447e-104	0.551207	0.448	0.067	1.09101e-99
SERPING1	5.82398e-104	0.629053	0.235	0	1.20696e-99
COL4A5	5.82398e-104	0.580209	0.235	0	1.20696e-99
ZDHHC2	5.85172e-104	0.599452	0.319	0.023	1.21271e-99
RAD23B	6.00364e-104	0.497535	0.508	0.088	1.2442e-99
SNHG10	8.35114e-104	0.575493	0.351	0.032	1.73069e-99
PDCL3	8.96626e-104	0.625473	0.274	0.01	1.85817e-99
POP5	9.39672e-104	0.623882	0.369	0.039	1.94738e-99
JAK1	9.99011e-104	0.549043	0.416	0.055	2.07035e-99
EIF4A3	1.18562e-103	0.542936	0.444	0.065	2.45708e-99
SFXN4	1.41107e-103	0.62075	0.288	0.014	2.9243e-99
RELB	1.46414e-103	0.506468	0.506	0.088	3.03429e-99
RCC2	1.91368e-103	0.444078	0.6	0.125	3.96592e-99
BCLAF1	2.14644e-103	-1.20585	0.971	0.801	4.44829e-99
MZB1	2.56438e-103	0.674283	0.234	0	5.31442e-99
AHCYL1	4.58833e-103	0.553553	0.448	0.068	9.50885e-99
PRKCSH	4.88683e-103	0.476887	0.703	0.174	1.01275e-98
COPZ1	5.25454e-103	0.684148	0.351	0.035	1.08895e-98
PSMD3	6.45032e-103	0.582875	0.379	0.042	1.33677e-98
RUVBL2	7.64996e-103	0.639942	0.359	0.038	1.58538e-98
MRPL13	8.03326e-103	0.572786	0.302	0.018	1.66481e-98
IGHM	1.12786e-102	0.697889	0.233	0	2.33738e-98
CMTM7	1.16062e-102	0.60593	0.298	0.017	2.40528e-98
MPC1	1.34506e-102	0.559688	0.373	0.041	2.7875e-98
PSMG3	1.49086e-102	0.571856	0.38	0.043	3.08965e-98
MPRIP	1.94503e-102	0.514935	0.365	0.039	4.03088e-98
FUOM	3.30795e-102	0.654914	0.304	0.02	6.8554e-98
PPP2R2D	3.43172e-102	0.400117	0.503	0.088	7.1119e-98
PDLIM2	3.71849e-102	0.586699	0.376	0.042	7.7062e-98
RNPS1	4.03234e-102	0.455521	0.873	0.245	8.35662e-98
SYF2	4.64791e-102	0.549379	0.93	0.276	9.63234e-98
NAA10	4.88091e-102	0.44253	0.595	0.127	1.01152e-97
SLC5A10	4.95495e-102	0.596675	0.231	0	1.02686e-97
FAM32A	5.04735e-102	0.505566	0.45	0.069	1.04601e-97
POLD2	5.54108e-102	0.402188	0.514	0.091	1.14833e-97
COPS4	7.23751e-102	0.509887	0.433	0.063	1.4999e-97
NFIC	7.606e-102	0.456111	0.532	0.101	1.57627e-97
FAM219B	7.912e-102	0.538875	0.375	0.041	1.63968e-97
G3BP1	8.41481e-102	0.485728	0.487	0.083	1.74388e-97
TEN1	1.04166e-101	0.463527	0.492	0.085	2.15873e-97
LINC01578	1.24076e-101	-1.02009	0.989	0.79	2.57134e-97
DUSP2	1.32038e-101	0.668501	0.481	0.082	2.73635e-97
C16orf87	1.40284e-101	0.439439	0.602	0.13	2.90724e-97
POLR2L	1.57277e-101	0.524492	0.827	0.219	3.25941e-97
LLPH	1.7548e-101	0.478382	0.584	0.122	3.63665e-97
SDCBP	1.79429e-101	0.487022	0.786	0.21	3.71849e-97
RBM17	1.8002e-101	0.450446	0.638	0.144	3.73073e-97
PPIA	1.93551e-101	0.950457	0.996	0.325	4.01115e-97
CACYBP	2.35723e-101	0.468777	0.65	0.149	4.88513e-97
CHRAC1	2.38933e-101	0.626892	0.359	0.038	4.95164e-97
CHIC2	2.99985e-101	0.623347	0.379	0.045	6.2169e-97
SMU1	3.07198e-101	0.449447	0.499	0.086	6.36638e-97
APLP2	3.52598e-101	0.558043	0.882	0.258	7.30724e-97
LAMP2	3.64126e-101	0.449599	0.625	0.14	7.54614e-97
ELAVL1	4.65856e-101	0.455752	0.49	0.085	9.65441e-97
SPN	5.49738e-101	0.399682	0.809	0.216	1.13928e-96
POLR1E	6.54138e-101	0.613548	0.277	0.012	1.35564e-96
NPM2	7.20478e-101	0.573862	0.344	0.032	1.49312e-96
NUS1	7.76935e-101	0.536016	0.358	0.037	1.61012e-96
MRPS23	8.22195e-101	0.592015	0.267	0.01	1.70392e-96
TIMM8B	8.74439e-101	0.664672	0.391	0.051	1.81219e-96
SUGT1	9.73301e-101	0.498307	0.416	0.057	2.01707e-96
PSMC3	1.04742e-100	0.395971	0.563	0.114	2.17067e-96
ARPC4	1.07162e-100	0.502966	0.696	0.166	2.22082e-96
PLAA	1.08589e-100	0.538602	0.416	0.058	2.25039e-96
LDLR	1.13441e-100	-2.57165	0.123	0.546	2.35094e-96
NCOA7	1.14072e-100	0.516529	0.357	0.035	2.36404e-96
TCEAL3	1.17612e-100	0.597003	0.313	0.023	2.43739e-96
PAFAH1B2	1.53949e-100	0.359066	0.744	0.19	3.19044e-96
VPS29	1.66171e-100	0.460836	0.617	0.138	3.44372e-96
ZNF136	1.84607e-100	0.521789	0.364	0.039	3.82579e-96
BRIX1	2.38696e-100	0.517524	0.414	0.057	4.94674e-96
SRI	2.5974e-100	0.439397	0.66	0.156	5.38286e-96
NT5C	2.69695e-100	0.481203	0.525	0.101	5.58916e-96
NOL12	2.8598e-100	0.600429	0.326	0.027	5.92666e-96
SYS1	3.19435e-100	0.555528	0.369	0.042	6.61998e-96
TSPAN3	4.05755e-100	0.541798	0.37	0.041	8.40887e-96
EIF5A	4.585e-100	0.858094	0.986	0.339	9.50195e-96
BCL7B	5.92902e-100	0.464064	0.525	0.1	1.22873e-95
RPL37	6.80292e-100	0.686184	1	0.506	1.40984e-95
ASAH1	7.03027e-100	0.436649	0.869	0.241	1.45695e-95
CZIB	7.82215e-100	0.608768	0.338	0.032	1.62106e-95
DENND6B	1.04324e-99	0.510625	0.446	0.069	2.162e-95
NCOA4	1.21478e-99	0.428741	0.695	0.172	2.51751e-95
SFPQ	1.75346e-99	-0.883369	0.999	0.825	3.63387e-95
LRPPRC	1.77566e-99	0.469651	0.481	0.083	3.67989e-95
COG3	1.99279e-99	0.494878	0.496	0.089	4.12985e-95
GNAS	2.56566e-99	-0.823142	0.997	0.821	5.31707e-95
DPM3	2.68859e-99	0.625472	0.468	0.081	5.57184e-95
EMP1	2.9437e-99	0.568845	0.603	0.136	6.10053e-95
PRAM1	2.975e-99	0.351961	0.574	0.116	6.1654e-95
COTL1	3.22907e-99	0.489865	0.78	0.206	6.69193e-95
NAE1	3.38148e-99	0.565341	0.345	0.034	7.00778e-95
LTC4S	4.10133e-99	0.51324	0.688	0.168	8.4996e-95
PMAIP1	4.23257e-99	0.618417	0.915	0.279	8.77158e-95
LARP1	4.44474e-99	0.49406	0.451	0.071	9.21127e-95
PHF20	5.35442e-99	0.471269	0.503	0.093	1.10965e-94
MEA1	6.0512e-99	0.585821	0.276	0.013	1.25405e-94
DDA1	6.99845e-99	0.591044	0.422	0.062	1.45036e-94
BNIP3L	7.48011e-99	0.424716	0.593	0.129	1.55018e-94
TMEM9B	7.75046e-99	0.595312	0.375	0.045	1.6062e-94
PSMC2	7.99473e-99	0.49994	0.38	0.046	1.65683e-94
UFM1	9.14138e-99	0.412574	0.712	0.18	1.89446e-94
PEMT	1.05042e-98	0.608775	0.291	0.018	2.1769e-94
PHC2	1.05148e-98	0.566716	0.292	0.018	2.17908e-94
CYC1	1.1682e-98	0.356606	0.788	0.21	2.42099e-94
DCXR	1.27379e-98	0.551316	0.596	0.135	2.63981e-94
RNF115	1.31314e-98	0.491953	0.461	0.077	2.72136e-94
NECAP2	1.34764e-98	0.519946	0.462	0.078	2.79286e-94
INTS10	1.37437e-98	0.437432	0.465	0.076	2.84825e-94
RNF126	1.55689e-98	0.443564	0.506	0.094	3.22651e-94
PTPN11	1.68934e-98	0.558622	0.343	0.034	3.501e-94
DDX52	1.69536e-98	0.343302	0.706	0.173	3.51346e-94
BCL2A1	1.76059e-98	0.549768	0.39	0.05	3.64865e-94
SURF4	2.41124e-98	0.409825	0.666	0.159	4.99705e-94
TCEA2	2.5176e-98	0.571949	0.352	0.038	5.21747e-94
GNAQ	2.8977e-98	0.454354	0.595	0.13	6.0052e-94
EPRS	3.22899e-98	0.621512	0.343	0.034	6.69176e-94
AIG1	3.47934e-98	0.56912	0.223	0	7.21059e-94
PSMC1	3.84133e-98	0.313564	0.631	0.142	7.96078e-94
GTF2F2	3.96675e-98	0.596047	0.305	0.023	8.22069e-94
CHMP3	3.99644e-98	0.625356	0.409	0.06	8.28222e-94
SUMF2	4.37122e-98	0.418522	0.733	0.187	9.05891e-94
C7orf50	4.71701e-98	0.609879	0.398	0.055	9.77554e-94
GATA2	4.71825e-98	0.609608	0.23	0.002	9.77809e-94
YY1	4.82177e-98	0.433145	0.868	0.247	9.99263e-94
TXNRD1	4.85728e-98	0.401252	0.514	0.095	1.00662e-93
OAT	4.92564e-98	0.541184	0.396	0.053	1.02079e-93
DAZAP1	5.72659e-98	0.395782	0.65	0.154	1.18678e-93
MRPS34	9.08958e-98	0.492476	0.474	0.084	1.88372e-93
DAP3	1.04015e-97	0.419994	0.545	0.112	2.1556e-93
POLR2G	1.08197e-97	0.547115	0.436	0.069	2.24227e-93
MSRA	1.29399e-97	0.57801	0.376	0.046	2.68166e-93
RASL10A	1.5166e-97	0.617377	0.221	0	3.143e-93
SNRPD3	1.52576e-97	0.590818	0.45	0.077	3.16198e-93
CXXC5	1.73847e-97	0.423058	0.572	0.118	3.60281e-93
MED8	1.80277e-97	0.565642	0.259	0.009	3.73605e-93
PWP1	1.9697e-97	0.554534	0.286	0.017	4.08201e-93
SF3A3	2.03124e-97	0.517706	0.377	0.046	4.20954e-93
TMEM126B	2.88651e-97	0.571162	0.291	0.019	5.98201e-93
PRPF6	2.93177e-97	0.527771	0.407	0.057	6.0758e-93
MRPL1	3.92317e-97	0.531212	0.33	0.031	8.13037e-93
NAA38	4.27803e-97	0.519791	0.741	0.191	8.86578e-93
SNW1	6.42684e-97	0.325063	0.677	0.161	1.3319e-92
TPI1	6.45758e-97	0.729247	0.965	0.303	1.33827e-92
INKA1	6.60328e-97	0.606738	0.22	0	1.36846e-92
ADGRG3	6.60328e-97	0.598895	0.22	0	1.36846e-92
SKIL	7.2553e-97	0.475445	0.575	0.125	1.50359e-92
CTDSP2	7.91267e-97	0.522115	0.369	0.043	1.63982e-92
GFOD1	8.15122e-97	0.547528	0.302	0.021	1.68926e-92
TBC1D2B	9.04819e-97	0.424141	0.425	0.063	1.87515e-92
UTP18	9.89908e-97	0.496056	0.384	0.049	2.05149e-92
DERL1	1.1101e-96	0.393323	0.596	0.13	2.30058e-92
SPPL3	1.11608e-96	0.424996	0.409	0.058	2.31297e-92
FKBP8	1.11611e-96	0.395657	0.819	0.225	2.31304e-92
NDUFS8	1.24147e-96	0.372961	0.758	0.203	2.57283e-92
CYB5R3	1.24738e-96	0.562177	0.391	0.053	2.58507e-92
CDKN2AIPNL	1.32873e-96	0.519157	0.322	0.028	2.75365e-92
SLIRP	1.55629e-96	0.562643	0.447	0.075	3.22526e-92
KRT8	1.57689e-96	0.614987	0.24	0.005	3.26794e-92
VPS37B	2.37476e-96	0.345607	0.603	0.132	4.92145e-92
ELOVL1	2.749e-96	0.556773	0.281	0.016	5.69702e-92
MORN2	2.87186e-96	0.539558	0.219	0	5.95164e-92
NAT14	2.87186e-96	0.569842	0.219	0	5.95164e-92
LEPROT	3.719e-96	0.438263	0.585	0.129	7.70725e-92
MRPS9	4.03013e-96	0.55286	0.258	0.01	8.35204e-92
GGCX	5.18895e-96	0.554244	0.325	0.03	1.07536e-91
RNF6	5.20081e-96	0.566716	0.338	0.034	1.07782e-91
MLEC	6.16528e-96	0.32463	0.557	0.114	1.27769e-91
PGAM1	6.56954e-96	0.507017	0.524	0.105	1.36147e-91
CUX1	6.61771e-96	0.396454	0.529	0.104	1.37145e-91
Z93241.1	6.94352e-96	-2.74211	0.033	0.465	1.43897e-91
IMP4	6.98257e-96	0.456245	0.458	0.078	1.44707e-91
PDHB	7.77678e-96	0.530001	0.326	0.031	1.61166e-91
TES	8.29871e-96	0.383549	0.641	0.153	1.71982e-91
RPS27L	8.75569e-96	0.507715	0.758	0.204	1.81453e-91
SLC30A5	9.98547e-96	0.513518	0.348	0.038	2.06939e-91
ATP6V1D	1.01253e-95	0.5041	0.359	0.041	2.09838e-91
RICTOR	1.20422e-95	0.340991	0.726	0.184	2.49563e-91
GCAT	1.24762e-95	0.547859	0.217	0	2.58557e-91
NEU4	1.24762e-95	0.601534	0.217	0	2.58557e-91
COQ10B	1.35411e-95	0.476135	0.504	0.096	2.80626e-91
JPX	1.79804e-95	0.359713	0.675	0.166	3.72625e-91
NUDT3	2.21482e-95	0.343935	0.592	0.13	4.59e-91
SNHG21	2.35229e-95	0.58006	0.292	0.02	4.87489e-91
ACBD3	2.5227e-95	0.405378	0.474	0.083	5.22805e-91
PLAAT4	3.50577e-95	0.661547	0.27	0.014	7.26536e-91
MRPL48	4.5497e-95	0.589391	0.291	0.02	9.4288e-91
JDP2	4.73443e-95	0.54842	0.313	0.026	9.81163e-91
ACOT13	5.01259e-95	0.558031	0.26	0.011	1.03881e-90
ASPH	5.09625e-95	0.511202	0.368	0.045	1.05615e-90
ATF3	5.55784e-95	0.657697	0.967	0.318	1.15181e-90
NDUFAF2	5.61924e-95	0.58516	0.253	0.01	1.16453e-90
PRPF31	5.6943e-95	0.523438	0.391	0.055	1.18009e-90
ATP5F1B	6.07972e-95	0.718421	0.974	0.32	1.25996e-90
BSDC1	6.59075e-95	0.374349	0.614	0.14	1.36587e-90
TUSC2	6.76847e-95	0.619708	0.276	0.016	1.4027e-90
EEF1AKMT2	6.82017e-95	0.466663	0.372	0.046	1.41341e-90
FBXO33	6.95992e-95	0.405351	0.568	0.123	1.44237e-90
ZC3HAV1	8.01763e-95	0.383079	0.533	0.106	1.66157e-90
S1PR4	1.18122e-94	0.604743	0.295	0.021	2.44796e-90
ABCB7	1.18824e-94	0.48024	0.343	0.036	2.4625e-90
RBMX	1.42058e-94	0.485422	0.911	0.276	2.94401e-90
MANF	1.59562e-94	0.523249	0.368	0.045	3.30676e-90
TMF1	1.72239e-94	0.338164	0.691	0.172	3.56948e-90
SREK1IP1	1.96066e-94	0.561619	0.4	0.057	4.06327e-90
PAM16	2.04286e-94	0.464783	0.46	0.082	4.23363e-90
VMA21	2.24932e-94	0.334918	0.635	0.147	4.66148e-90
APPL1	2.32165e-94	0.362497	0.582	0.128	4.81139e-90
ITM2A	2.34677e-94	0.581313	0.214	0	4.86344e-90
CD63	2.55901e-94	0.660067	0.955	0.309	5.30329e-90
AGTRAP	2.56696e-94	0.515006	0.474	0.087	5.31977e-90
PFDN1	3.02495e-94	0.492579	0.419	0.065	6.2689e-90
B4GALT1	3.67245e-94	0.569311	0.467	0.087	7.61079e-90
RTCA	3.90331e-94	0.510021	0.386	0.052	8.08923e-90
RNF2	4.63649e-94	0.58717	0.252	0.01	9.60866e-90
BOLA3	4.65907e-94	0.579342	0.267	0.014	9.65545e-90
NTMT1	5.02013e-94	0.556585	0.288	0.02	1.04037e-89
CTNNBIP1	5.06538e-94	0.559298	0.287	0.02	1.04975e-89
RASSF1	6.04101e-94	0.317703	0.558	0.117	1.25194e-89
PSENEN	6.05831e-94	0.615771	0.299	0.024	1.25552e-89
SMIM7	6.25947e-94	0.450264	0.444	0.075	1.29721e-89
MBD4	6.68023e-94	0.394517	0.579	0.129	1.38441e-89
CISD3	6.89168e-94	0.582654	0.283	0.019	1.42823e-89
VTI1B	7.09743e-94	0.553666	0.299	0.024	1.47087e-89
MGAT4A	9.46461e-94	0.559654	0.259	0.011	1.96145e-89
POLR2E	1.40854e-93	0.480507	0.521	0.108	2.91905e-89
HSP90B1	1.45995e-93	-1.13746	0.979	0.816	3.02561e-89
SUCLA2	2.06194e-93	0.514547	0.323	0.031	4.27317e-89
ABRAXAS1	2.14885e-93	0.5777	0.247	0.009	4.45327e-89
LBR	2.43394e-93	0.379445	0.627	0.147	5.04409e-89
ZNF426	2.56292e-93	0.507311	0.276	0.016	5.3114e-89
HMGB3	3.59543e-93	0.516969	0.345	0.039	7.45117e-89
MRPS17	4.20873e-93	0.502025	0.302	0.024	8.72217e-89
RAB27A	4.32308e-93	0.540732	0.358	0.043	8.95914e-89
IFI44	4.39468e-93	0.581405	0.212	0	9.10753e-89
PFDN5	4.71853e-93	0.988883	0.999	0.367	9.77868e-89
CHMP5	5.1505e-93	0.550254	0.327	0.033	1.06739e-88
DUSP11	5.41067e-93	0.56389	0.266	0.014	1.12131e-88
H2AFZ	7.62955e-93	0.515387	0.936	0.286	1.58115e-88
MRPL32	8.54859e-93	0.485493	0.37	0.047	1.77161e-88
RNASE2	9.18119e-93	0.652122	0.521	0.109	1.90271e-88
MALSU1	1.12682e-92	0.518376	0.26	0.012	2.33522e-88
BLVRB	1.36716e-92	0.512515	0.451	0.079	2.8333e-88
AC025159.1	1.52217e-92	0.461351	0.451	0.078	3.15455e-88
YDJC	1.76936e-92	0.526703	0.344	0.04	3.66681e-88
EIF1B	1.89286e-92	0.621609	0.951	0.315	3.92277e-88
IMPAD1	2.04841e-92	0.443908	0.377	0.049	4.24512e-88
EIF4E2	2.08766e-92	0.516764	0.369	0.048	4.32646e-88
HPS1	2.60473e-92	0.392461	0.446	0.076	5.39804e-88
N4BP2L1	2.80343e-92	0.443315	0.489	0.093	5.80982e-88
TMEM160	3.69232e-92	0.318295	0.636	0.154	7.65196e-88
SNHG4	3.7915e-92	0.499097	0.337	0.036	7.85751e-88
DTD1	4.44913e-92	0.596688	0.279	0.019	9.22038e-88
CYCS	4.6268e-92	0.590642	0.94	0.292	9.58858e-88
SYTL1	4.99942e-92	0.301997	0.79	0.214	1.03608e-87
DECR1	5.19106e-92	0.482599	0.331	0.034	1.07579e-87
HSH2D	5.27433e-92	-1.61415	0.834	0.767	1.09305e-87
SF3A1	6.1832e-92	0.487515	0.369	0.048	1.28141e-87
USP47	6.63738e-92	0.304976	0.67	0.168	1.37553e-87
SPART	9.03846e-92	0.374106	0.478	0.087	1.87313e-87
LAP3	9.08487e-92	0.346096	0.458	0.08	1.88275e-87
RPAIN	1.40773e-91	0.390683	0.526	0.11	2.91737e-87
AIMP1	1.79146e-91	0.321805	0.702	0.183	3.71262e-87
MRPL36	2.11817e-91	0.580956	0.273	0.018	4.38969e-87
IK	2.14216e-91	0.376088	0.51	0.101	4.43941e-87
SLC39A1	2.17443e-91	0.534355	0.26	0.013	4.50628e-87
SPTY2D1	2.17727e-91	0.318353	0.669	0.166	4.51218e-87
CAPNS1	2.29802e-91	0.533024	0.618	0.148	4.76243e-87
SON	2.53775e-91	-1.27066	0.958	0.791	5.25923e-87
IPO7	2.53869e-91	0.469671	0.467	0.085	5.26119e-87
COMMD1	2.6564e-91	0.580109	0.279	0.019	5.50512e-87
SAP18	3.5531e-91	0.799631	0.987	0.342	7.36344e-87
STARD3NL	4.15315e-91	0.524865	0.305	0.027	8.607e-87
MTMR6	4.2885e-91	0.463	0.368	0.047	8.88749e-87
SAMM50	4.32824e-91	0.471999	0.341	0.039	8.96984e-87
FHIT	4.36086e-91	0.542505	0.26	0.013	9.03745e-87
PSMD14	4.48851e-91	0.352616	0.49	0.094	9.30199e-87
SLC35E1	5.75572e-91	0.408143	0.446	0.076	1.19282e-86
ZMYM5	6.62881e-91	0.434599	0.469	0.089	1.37376e-86
TRAPPC3	7.51239e-91	0.553315	0.313	0.03	1.55687e-86
MICU2	1.40981e-90	0.482267	0.352	0.043	2.92169e-86
GPAT3	1.52077e-90	0.559913	0.206	0	3.15165e-86
NUDT2	1.52077e-90	0.534948	0.206	0	3.15165e-86
WT1	1.52077e-90	0.55657	0.206	0	3.15165e-86
KLHL24	1.69885e-90	0.394922	0.54	0.116	3.5207e-86
EIF2S1	1.8812e-90	0.568139	0.253	0.012	3.8986e-86
OSBPL9	1.88238e-90	0.27738	0.577	0.128	3.90104e-86
TLE4	1.94397e-90	-1.82775	0.699	0.723	4.02869e-86
RPGR	2.05413e-90	0.371659	0.539	0.115	4.25697e-86
UBE2K	2.13242e-90	0.457079	0.45	0.08	4.41923e-86
GANAB	2.73541e-90	0.522568	0.43	0.075	5.66886e-86
RSF1	2.77854e-90	0.347679	0.6	0.139	5.75824e-86
ALKBH5	3.48044e-90	0.460431	0.439	0.077	7.21286e-86
MMP24OS	3.56015e-90	0.488846	0.494	0.1	7.37805e-86
NANS	4.3609e-90	0.354301	0.62	0.151	9.03752e-86
CFDP1	5.17562e-90	0.399743	0.469	0.088	1.07259e-85
GPN1	6.29619e-90	0.513354	0.298	0.026	1.30482e-85
CAVIN2	6.54105e-90	0.585487	0.205	0	1.35557e-85
CHCHD1	7.06018e-90	0.57776	0.333	0.039	1.46315e-85
RHOG	8.07135e-90	0.395659	0.787	0.221	1.67271e-85
PER2	8.75366e-90	0.482864	0.458	0.084	1.81411e-85
RPARP-AS1	8.93904e-90	0.530206	0.283	0.021	1.85253e-85
RAB11A	9.23349e-90	0.472404	0.423	0.071	1.91355e-85
IFRD2	9.72677e-90	0.509336	0.283	0.021	2.01577e-85
IDH3G	1.11442e-89	0.396603	0.524	0.111	2.30952e-85
NPM3	1.27781e-89	0.599086	0.287	0.024	2.64813e-85
AK6	1.44252e-89	0.560244	0.248	0.011	2.98948e-85
SLC66A2	1.90887e-89	0.386418	0.45	0.079	3.95594e-85
PELI1	1.94628e-89	0.278173	0.645	0.158	4.03347e-85
DCUN1D1	2.29979e-89	0.441715	0.415	0.067	4.76608e-85
SRFBP1	2.34456e-89	0.522041	0.258	0.014	4.85886e-85
KANSL1-AS1	2.42688e-89	0.591169	0.258	0.014	5.02947e-85
PPID	2.44193e-89	0.503646	0.305	0.028	5.06065e-85
PKM	2.65184e-89	0.517135	0.882	0.275	5.49568e-85
IFITM3	2.81029e-89	0.584179	0.203	0	5.82405e-85
ITGB1BP1	2.93845e-89	0.443276	0.329	0.036	6.08964e-85
DIS3	3.11499e-89	0.385361	0.464	0.085	6.4555e-85
CLN5	3.20631e-89	0.503496	0.33	0.037	6.64476e-85
PRCP	3.31211e-89	0.509072	0.34	0.041	6.86402e-85
SMARCE1	4.53589e-89	0.35968	0.517	0.107	9.40017e-85
CISD2	5.99616e-89	0.576001	0.272	0.019	1.24264e-84
JAG1	6.16368e-89	0.522433	0.274	0.019	1.27736e-84
BAZ1A	7.16044e-89	0.376313	0.469	0.09	1.48393e-84
PIGT	8.0497e-89	0.269856	0.606	0.142	1.66822e-84
GLUD1	8.39445e-89	0.434666	0.497	0.102	1.73967e-84
COA5	1.05296e-88	0.485398	0.306	0.029	2.18216e-84
FAAP20	1.09482e-88	0.292478	0.618	0.15	2.2689e-84
SERINC1	1.2874e-88	0.384067	0.494	0.098	2.66801e-84
COPRS	1.40445e-88	0.503554	0.32	0.034	2.91059e-84
RPL21	1.46739e-88	0.811216	1	0.504	3.04102e-84
TIMM17B	1.63765e-88	0.557058	0.343	0.043	3.39386e-84
CTSC	1.68417e-88	0.305964	0.652	0.165	3.49028e-84
LINC01268	1.76654e-88	0.527906	0.262	0.016	3.66098e-84
SRPRA	1.81338e-88	0.390222	0.387	0.057	3.75806e-84
DSTYK	2.27128e-88	0.412499	0.497	0.101	4.707e-84
PRPS2	2.30438e-88	0.555665	0.227	0.006	4.7756e-84
LIMD2	2.77511e-88	0.335048	0.798	0.226	5.75114e-84
MSN	3.19922e-88	0.469294	0.898	0.281	6.63006e-84
HOPX	3.50668e-88	0.625942	0.203	0.001	7.26725e-84
MRPL16	3.99355e-88	0.543055	0.292	0.026	8.27624e-84
HTATSF1	4.12114e-88	0.29165	0.508	0.104	8.54065e-84
NECTIN2	5.41012e-88	0.391196	0.471	0.09	1.12119e-83
TM9SF3	5.78371e-88	0.341389	0.802	0.234	1.19862e-83
RSBN1L	6.33741e-88	0.316037	0.436	0.075	1.31336e-83
VPS26A	7.02722e-88	0.385094	0.517	0.108	1.45632e-83
QTRT1	7.23674e-88	0.442134	0.393	0.061	1.49974e-83
IRF9	7.33834e-88	0.542799	0.421	0.071	1.5208e-83
NGRN	8.21099e-88	0.446628	0.338	0.04	1.70165e-83
MAP3K8	8.61138e-88	0.354724	0.716	0.196	1.78462e-83
LASP1	9.22773e-88	0.494237	0.416	0.07	1.91236e-83
NIBAN1	1.02152e-87	0.554337	0.223	0.005	2.117e-83
CERS2	1.09369e-87	0.442333	0.443	0.081	2.26656e-83
MRPS26	1.37387e-87	0.488362	0.358	0.049	2.8472e-83
PBDC1	1.44664e-87	0.356334	0.481	0.094	2.99801e-83
STX10	1.57849e-87	0.500663	0.373	0.055	3.27127e-83
ZCCHC10	1.65478e-87	0.524611	0.354	0.047	3.42937e-83
EXOC6	1.89545e-87	0.410714	0.369	0.051	3.92812e-83
PIGK	2.03139e-87	0.536069	0.248	0.012	4.20984e-83
RGL4	2.21408e-87	0.515531	0.199	0	4.58847e-83
ORMDL2	2.28565e-87	0.524294	0.256	0.015	4.73678e-83
IDI1	2.48342e-87	0.339707	0.682	0.181	5.14664e-83
ZMAT2	2.50976e-87	0.478013	0.38	0.057	5.20123e-83
LYST	2.87851e-87	-1.98289	0.552	0.684	5.96543e-83
MCRIP1	3.00754e-87	0.349051	0.528	0.116	6.23282e-83
ADK	3.35625e-87	0.44344	0.38	0.057	6.95549e-83
CENPH	3.37689e-87	0.504782	0.259	0.016	6.99828e-83
MPZL1	4.98669e-87	0.562846	0.262	0.017	1.03344e-82
FUCA2	5.12587e-87	0.562199	0.301	0.029	1.06229e-82
PPHLN1	5.44681e-87	0.318971	0.76	0.214	1.1288e-82
SSRP1	6.16673e-87	0.511865	0.35	0.046	1.27799e-82
IL12A-AS1	9.4708e-87	0.569678	0.198	0	1.96273e-82
CLPTM1L	1.12e-86	0.473583	0.357	0.048	2.32109e-82
ZNF12	1.20864e-86	0.504797	0.327	0.038	2.50479e-82
ELL2	1.4088e-86	0.499721	0.318	0.035	2.9196e-82
DERA	1.51183e-86	0.517172	0.284	0.024	3.13311e-82
NDUFV2	1.7139e-86	0.317235	0.802	0.229	3.55188e-82
EPC1	1.76576e-86	0.396792	0.845	0.257	3.65936e-82
VAV3	2.07454e-86	0.477545	0.359	0.049	4.29928e-82
SMC3	2.17387e-86	0.329381	0.472	0.092	4.50514e-82
WDR18	2.33307e-86	0.505619	0.343	0.044	4.83505e-82
TMEM205	2.62566e-86	0.390662	0.596	0.146	5.44142e-82
ARIH2	3.6352e-86	0.332217	0.444	0.082	7.5336e-82
RER1	3.83329e-86	0.366487	0.446	0.083	7.94411e-82
PLTP	4.04671e-86	0.532486	0.196	0	8.38641e-82
SURF1	5.20809e-86	0.516753	0.386	0.061	1.07933e-81
OIP5-AS1	5.232e-86	0.31541	0.589	0.143	1.08428e-81
SNX5	5.53283e-86	0.325626	0.557	0.127	1.14662e-81
USP12	5.98761e-86	0.414342	0.558	0.132	1.24087e-81
DNAJC21	6.01177e-86	0.30302	0.543	0.12	1.24588e-81
MED6	6.05872e-86	0.378052	0.475	0.094	1.25561e-81
ADIPOR1	6.06609e-86	0.384445	0.429	0.075	1.25714e-81
MIER1	6.09325e-86	0.301865	0.67	0.176	1.26277e-81
ARPP19	7.40928e-86	0.315634	0.628	0.16	1.5355e-81
SEPTIN7	8.01798e-86	0.374292	0.876	0.262	1.66165e-81
SLC25A26	8.27225e-86	0.522949	0.304	0.032	1.71434e-81
PTGER2	1.26048e-85	0.487487	0.32	0.036	2.61222e-81
RPP21	1.2624e-85	0.527281	0.248	0.013	2.6162e-81
UBE3A	1.28444e-85	0.298526	0.515	0.109	2.66187e-81
SNRNP25	1.305e-85	0.546822	0.315	0.035	2.70448e-81
CNOT6L	1.30702e-85	0.449631	0.362	0.05	2.70866e-81
TLE3	1.51751e-85	0.367029	0.482	0.098	3.1449e-81
RBBP7	1.69216e-85	0.329719	0.674	0.182	3.50683e-81
TMBIM4	2.19446e-85	0.363678	0.567	0.133	4.54779e-81
SDF4	2.28109e-85	0.441456	0.444	0.084	4.72734e-81
LSM6	2.5938e-85	0.533156	0.281	0.024	5.37539e-81
NTPCR	3.28644e-85	0.533536	0.286	0.026	6.81081e-81
PCIF1	3.68404e-85	0.402319	0.43	0.077	7.63481e-81
TOP1MT	4.46667e-85	0.408343	0.503	0.108	9.25673e-81
MRPL34	4.75897e-85	0.538066	0.311	0.034	9.8625e-81
MAP3K13	5.39525e-85	0.562852	0.256	0.017	1.11811e-80
TRIM33	5.5507e-85	0.321022	0.518	0.113	1.15033e-80
NONO	6.03783e-85	0.383444	0.837	0.25	1.25128e-80
GSDMD	6.14795e-85	0.352561	0.45	0.085	1.2741e-80
RBM38	6.42305e-85	0.403774	0.38	0.058	1.33111e-80
RDX	6.99425e-85	0.387862	0.414	0.071	1.44949e-80
PXMP2	7.36387e-85	0.510894	0.194	0	1.52609e-80
TNFRSF25	7.39794e-85	0.48978	0.227	0.008	1.53315e-80
RAE1	8.134e-85	0.317575	0.465	0.091	1.68569e-80
COA1	8.62058e-85	0.518897	0.263	0.019	1.78653e-80
RNF168	8.65897e-85	0.41464	0.415	0.072	1.79448e-80
ODF2L	9.31904e-85	0.432532	0.368	0.054	1.93128e-80
MYADM	9.41824e-85	-1.02555	0.981	0.774	1.95184e-80
GORASP2	1.40717e-84	0.362787	0.369	0.053	2.91623e-80
COPA	1.59795e-84	0.324916	0.652	0.172	3.31159e-80
EIF4G2	1.61268e-84	-1.2879	0.942	0.767	3.34213e-80
C12orf45	1.86524e-84	0.513468	0.288	0.027	3.86552e-80
AC058791.1	2.98317e-84	0.662884	0.343	0.048	6.18232e-80
GGH	3.13614e-84	0.48923	0.192	0	6.49934e-80
ZNF506	3.20839e-84	0.462393	0.26	0.018	6.64906e-80
SLC39A4	3.80692e-84	0.558723	0.244	0.014	7.88946e-80
TMEM101	4.03128e-84	0.517603	0.26	0.018	8.35442e-80
IL2RG	4.26419e-84	0.383009	0.607	0.153	8.83711e-80
TMEM9	4.46971e-84	0.527358	0.294	0.029	9.26302e-80
NUBP2	4.70947e-84	0.473205	0.355	0.051	9.75991e-80
CCDC115	4.77264e-84	0.50385	0.316	0.037	9.89082e-80
PRPS1	4.86515e-84	0.539506	0.297	0.031	1.00825e-79
PRKACB	5.28532e-84	0.448141	0.383	0.061	1.09533e-79
EXOSC1	6.18301e-84	0.512304	0.305	0.033	1.28137e-79
MBD2	6.40283e-84	0.433832	0.39	0.063	1.32692e-79
ZNF493	6.59962e-84	0.443329	0.323	0.038	1.36771e-79
RPL29	6.68776e-84	0.735519	1	0.56	1.38597e-79
SOCS3	6.7233e-84	0.528031	0.368	0.056	1.39334e-79
RPS29	7.62226e-84	0.72936	1	0.45	1.57964e-79
WDR43	9.10209e-84	0.291608	0.553	0.128	1.88632e-79
POLR2H	9.69968e-84	0.385821	0.383	0.06	2.01016e-79
OAF	1.01862e-83	0.505623	0.269	0.021	2.11099e-79
RBM15B	1.06934e-83	0.420585	0.309	0.034	2.2161e-79
TFB2M	1.10214e-83	0.432467	0.348	0.047	2.28408e-79
HAUS2	1.10975e-83	0.51692	0.288	0.027	2.29985e-79
STRADB	1.33417e-83	0.483347	0.191	0	2.76493e-79
PNRC2	1.50216e-83	0.31544	0.794	0.23	3.11308e-79
DRAM1	1.53113e-83	0.458236	0.369	0.055	3.17311e-79
COMMD2	1.60853e-83	0.484856	0.265	0.02	3.33352e-79
MRPS18C	1.64433e-83	0.555077	0.313	0.037	3.4077e-79
C5orf24	1.99526e-83	0.342635	0.453	0.087	4.13499e-79
ITGA2B	1.99684e-83	0.536619	0.226	0.009	4.13825e-79
NDUFAF6	2.14505e-83	0.472927	0.28	0.025	4.44541e-79
SH3D21	2.15783e-83	0.50865	0.27	0.021	4.47189e-79
MICOS10	2.18774e-83	0.439244	0.639	0.169	4.53387e-79
CREBRF	2.19551e-83	0.287791	0.702	0.188	4.54997e-79
MMAB	2.39429e-83	0.507862	0.255	0.017	4.96194e-79
MRPL20	2.81551e-83	0.396775	0.397	0.067	5.83487e-79
NOLC1	3.48852e-83	0.399442	0.375	0.057	7.2296e-79
SFXN3	3.93804e-83	0.462161	0.398	0.068	8.1612e-79
BUB3	4.10024e-83	0.427852	0.348	0.048	8.49734e-79
RNF138	4.26318e-83	0.371718	0.55	0.131	8.83502e-79
SETD9	4.32034e-83	0.50047	0.287	0.027	8.95346e-79
KTN1	4.88884e-83	0.261203	0.747	0.209	1.01316e-78
PKIG	4.88971e-83	0.513603	0.212	0.005	1.01334e-78
DNAJC15	4.992e-83	0.551168	0.28	0.026	1.03454e-78
MIR1-1HG-AS1	5.66958e-83	0.544406	0.189	0	1.17496e-78
RO60	5.7959e-83	0.338784	0.471	0.095	1.20114e-78
CETN2	6.27491e-83	0.539083	0.265	0.021	1.30041e-78
ING4	6.75874e-83	0.518185	0.242	0.014	1.40068e-78
RRAGA	7.08996e-83	0.518389	0.288	0.028	1.46932e-78
MPI	8.35354e-83	0.543109	0.233	0.011	1.73119e-78
LYSMD3	1.04104e-82	0.50953	0.235	0.012	2.15745e-78
OARD1	1.0751e-82	0.492491	0.361	0.053	2.22804e-78
DNPEP	1.13611e-82	0.412124	0.355	0.051	2.35447e-78
DYNC1LI1	1.17301e-82	0.424841	0.382	0.061	2.43095e-78
ARL6IP5	1.22548e-82	0.388857	0.585	0.147	2.53968e-78
ING5	1.39644e-82	0.40992	0.351	0.049	2.89399e-78
UBQLN1	1.43207e-82	0.336496	0.766	0.224	2.96782e-78
AZU1	1.43229e-82	-0.900991	0.95	0.826	2.96827e-78
DCAF13	1.49036e-82	0.508182	0.318	0.039	3.08862e-78
RBFA	1.49818e-82	0.437242	0.326	0.04	3.10483e-78
PLAUR	1.51615e-82	0.382588	0.773	0.224	3.14207e-78
NIPSNAP3A	1.54134e-82	0.469369	0.337	0.045	3.19428e-78
PRR5	1.55702e-82	0.491544	0.228	0.01	3.22677e-78
BSCL2	1.82027e-82	0.471836	0.312	0.036	3.77232e-78
SMARCD2	1.88247e-82	0.46629	0.343	0.047	3.90123e-78
METAP2	1.91443e-82	0.264136	0.712	0.197	3.96746e-78
WDR82	1.96925e-82	0.360732	0.444	0.086	4.08108e-78
LARP7	2.00101e-82	0.411673	0.376	0.059	4.14689e-78
CXCR4	2.57281e-82	-2.18306	0.301	0.592	5.33189e-78
TSR2	3.41408e-82	0.507207	0.279	0.025	7.07534e-78
DYNC1H1	3.46551e-82	0.326911	0.864	0.261	7.18191e-78
ISCA2	3.51829e-82	0.515998	0.272	0.023	7.2913e-78
POLR1C	3.80103e-82	0.426038	0.294	0.03	7.87726e-78
NT5M	4.64105e-82	0.461656	0.242	0.014	9.61812e-78
NUDT8	4.87253e-82	0.528713	0.291	0.03	1.00978e-77
FYTTD1	5.22611e-82	0.372476	0.397	0.067	1.08306e-77
CARD8-AS1	5.5791e-82	0.476801	0.249	0.016	1.15621e-77
RBM42	5.62481e-82	0.499179	0.366	0.058	1.16569e-77
SIKE1	5.80851e-82	0.424347	0.373	0.06	1.20376e-77
MRPS7	5.92283e-82	0.415139	0.319	0.039	1.22745e-77
NBEAL1	5.97581e-82	0.444394	0.32	0.04	1.23843e-77
CD82	7.28485e-82	0.292838	0.553	0.128	1.50971e-77
VAT1	9.83934e-82	0.509038	0.252	0.017	2.03911e-77
FOPNL	1.22752e-81	0.523799	0.259	0.02	2.5439e-77
CLDND1	1.27015e-81	0.338704	0.536	0.125	2.63226e-77
EXOSC7	1.58184e-81	0.481663	0.312	0.037	3.2782e-77
SVBP	1.70193e-81	0.494158	0.34	0.048	3.52708e-77
UBB	1.71709e-81	0.767687	0.994	0.35	3.5585e-77
RFXANK	1.80299e-81	0.465499	0.387	0.066	3.73651e-77
PYGL	2.29179e-81	0.282178	0.511	0.114	4.7495e-77
ZNF787	2.43158e-81	0.321823	0.451	0.09	5.03921e-77
CMTM6	2.52234e-81	0.341284	0.869	0.27	5.2273e-77
ERF	3.05679e-81	0.426408	0.352	0.051	6.33489e-77
VASP	3.22107e-81	0.350042	0.681	0.187	6.67534e-77
XBP1	3.2597e-81	0.555478	0.95	0.324	6.7554e-77
[truncated: 1,845 more rows]

## Sheet: PAVTLN-ALL-6vsD
gene_sym	p_val	avg_log2FC	pct.1	pct.2	p_val_adj
HNRNPU	0	-1.92643	0.916	0.972	0
COX7A2L	0	2.00358	0.814	0.072	0
GYPC	0	1.94847	0.661	0.007	0
MZT2B	0	2.01102	0.931	0.139	0
ZEB2	0	-2.98805	0.529	0.976	0
EEF1B2	0	2.35884	0.996	0.21	0
IMPDH2	0	1.97258	0.832	0.064	0
MTRNR2L12	0	-2.81882	0.843	0.998	0
CCNL1	0	-1.91851	0.961	0.994	0
SPINK2	0	2.27767	0.935	0.108	0
HSD17B11	0	1.81801	0.751	0.047	0
BTF3	0	2.47459	0.996	0.173	0
NPM1	0	1.97729	0.966	0.184	0
UXT	0	2.01071	0.873	0.086	0
SLC25A5	0	2.01509	0.918	0.143	0
EIF3E	0	2.18134	0.972	0.177	0
EGFL7	0	2.10944	0.695	0.005	0
TALDO1	0	2.06431	0.901	0.112	0
EIF3F	0	1.85585	0.931	0.154	0
NUCB2	0	1.97854	0.873	0.097	0
NEAT1	0	-1.91417	0.978	0.988	0
MALAT1	0	-1.9495	1	1	0
CTSW	0	2.20741	0.816	0.032	0
VIM	0	-1.35529	0.982	0.983	0
MGST1	0	2.29238	0.741	0.008	0
LDHB	0	2.54963	0.967	0.102	0
NACA	0	1.84165	0.999	0.303	0
EBPL	0	2.29221	0.835	0.033	0
COMMD6	0	2.11444	0.949	0.13	0
RTRAF	0	2.16861	0.907	0.095	0
FAM30A	0	2.12626	0.683	0.001	0
COX5A	0	1.83469	0.861	0.112	0
MPG	0	1.93395	0.783	0.057	0
APRT	0	1.85186	0.926	0.147	0
C1QBP	0	1.98426	0.814	0.07	0
NME2	0	2.41429	0.985	0.144	0
PRSS57	0	3.02355	0.962	0.004	0
GNA15	0	2.04338	0.791	0.034	0
SMIM24	0	2.54772	0.88	0.004	0
EIF3K	0	1.92363	0.943	0.153	0
FOSB	0	-1.74501	0.965	0.977	0
RPS5	0	1.78069	1	0.321	0
IGLL1	0	2.13674	0.72	0.014	0
EIF3L	0	2.06343	0.898	0.104	0
ST13	0	1.85253	0.881	0.109	0
ATP5PO	0	1.93019	0.852	0.085	0
MT-ND1	0	-1.34605	1	0.999	0
MT-ND2	0	-1.47207	0.999	0.999	0
MT-CO1	0	-1.77328	1	1	0
MT-CO2	0	-1.7536	1	1	0
MT-ATP6	0	-1.60188	1	0.999	0
MT-CO3	0	-1.64291	1	1	0
MT-ND3	0	-1.93767	1	1	0
MT-ND4L	0	-2.02106	0.961	0.991	0
MT-ND4	0	-1.66929	0.999	1	0
MT-ND5	0	-1.6489	0.994	0.994	0
SNHG29	0	2.40604	0.998	0.209	0
SNHG7	1.55495e-307	1.80385	0.864	0.104	3.22249e-303
OSTC	1.94264e-307	1.83022	0.782	0.068	4.02594e-303
CLU	8.34585e-306	2.04779	0.695	0.029	1.72959e-301
MT-CYB	4.88173e-304	-1.27785	0.999	0.996	1.01169e-299
AHNAK	1.05935e-303	-2.8228	0.531	0.95	2.1954e-299
LAMTOR1	1.95686e-303	1.82602	0.707	0.036	4.05539e-299
RPL23A	1.26901e-299	1.90599	1	0.242	2.62989e-295
NDUFS5	3.20563e-299	1.75287	0.875	0.123	6.64334e-295
RPL10A	5.84512e-299	1.68691	0.999	0.332	1.21134e-294
PPP1R14B	1.77722e-298	1.80239	0.815	0.09	3.68312e-294
COX7A2	5.49727e-298	1.78166	0.847	0.109	1.13925e-293
ANKRD28	1.70042e-297	-1.33001	0.979	0.966	3.52396e-293
XIST	1.93152e-297	-1.63621	0.966	0.979	4.00288e-293
SNX3	3.34053e-297	1.75733	0.814	0.087	6.92292e-293
MTRNR2L8	3.54474e-297	-2.81489	0.47	0.932	7.34611e-293
ALKBH7	4.52307e-297	1.75357	0.785	0.074	9.37362e-293
UQCRH	5.62775e-297	1.83862	0.965	0.187	1.1663e-292
PRDX6	2.0452e-296	1.80177	0.82	0.097	4.23848e-292
PARK7	2.17578e-296	1.75615	0.831	0.106	4.50909e-292
PRDX5	2.33598e-295	1.76502	0.855	0.11	4.84109e-291
PLCG2	1.07617e-293	-3.66654	0.225	0.907	2.23025e-289
ATP5F1C	2.27634e-293	1.80253	0.789	0.084	4.7175e-289
TRA2B	1.38086e-292	-1.92407	0.828	0.946	2.86169e-288
HNRNPA2B1	2.58475e-291	-1.52939	0.962	0.957	5.35663e-287
LRRC75A	8.09391e-291	2.11294	0.646	0.024	1.67738e-286
CAMLG	5.73482e-290	1.69823	0.751	0.059	1.18848e-285
NDUFA4	6.00177e-289	1.72864	0.916	0.152	1.24381e-284
CYTL1	7.29244e-288	1.75928	0.586	0	1.51129e-283
ATP5PF	1.85298e-287	1.73846	0.8	0.094	3.84012e-283
DDX5	2.01272e-287	-1.28345	0.984	0.967	4.17116e-283
EIF3H	1.16104e-285	1.73751	0.941	0.175	2.40614e-281
SMIM26	1.23732e-285	1.66087	0.805	0.093	2.56423e-281
RAB11FIP1	2.8876e-285	-2.08982	0.769	0.947	5.98426e-281
SUMO2	3.00644e-285	1.74022	0.918	0.165	6.23054e-281
EPB41L4A-AS1	8.93618e-285	1.71989	0.742	0.064	1.85193e-280
SNHG8	1.19497e-281	1.7129	0.937	0.178	2.47645e-277
SUMO1	2.0244e-281	1.64213	0.792	0.085	4.19537e-277
SNHG6	2.53948e-281	1.75978	0.965	0.183	5.26282e-277
NFKBIZ	1.85192e-280	-2.81103	0.46	0.907	3.83792e-276
HINT1	7.67108e-280	1.6964	0.995	0.295	1.58975e-275
AIF1	8.69481e-280	1.80977	0.984	0.206	1.80191e-275
PYURF	7.46752e-279	1.65794	0.607	0.014	1.54757e-274
COX7C	1.31793e-277	1.73726	0.936	0.158	2.73128e-273
JUND	5.95171e-277	-0.990785	1	0.982	1.23343e-272
NDUFB5	1.43286e-275	1.70095	0.707	0.057	2.96945e-271
PRDX1	2.07604e-275	1.81353	0.74	0.072	4.30239e-271
UFC1	1.93772e-274	1.67182	0.845	0.125	4.01574e-270
RPL6	5.29459e-274	1.67864	0.995	0.307	1.09725e-269
ATP6V1G1	6.46132e-274	1.65456	0.862	0.131	1.33904e-269
LSM2	6.8455e-274	1.71232	0.632	0.028	1.41866e-269
AHR	1.85871e-273	-3.00804	0.309	0.884	3.85199e-269
SPCS1	2.33676e-272	1.64314	0.809	0.102	4.8427e-268
RPL12	1.22948e-271	1.75371	1	0.285	2.54798e-267
GTF3A	5.60796e-271	1.65646	0.812	0.11	1.16219e-266
SH3BGRL	4.61276e-270	1.6781	0.795	0.104	9.55949e-266
MSI2	5.52454e-269	1.56482	0.837	0.097	1.1449e-264
SAT1	2.01152e-268	-1.62308	0.936	0.944	4.16868e-264
PEBP1	2.27222e-268	1.64199	0.84	0.115	4.70894e-264
NSA2	2.60752e-268	1.59816	0.855	0.129	5.40383e-264
TXN	3.08616e-266	1.71314	0.955	0.195	6.39577e-262
NPC2	5.01121e-266	1.62411	0.758	0.087	1.03852e-261
ARPC3	5.55296e-266	1.70958	0.924	0.173	1.1508e-261
RPL17	1.17517e-265	1.38292	1	0.436	2.43543e-261
TMEM59	1.64283e-265	1.58773	0.806	0.107	3.40461e-261
RSL24D1	6.48002e-265	1.67191	0.909	0.173	1.34292e-260
RPSA	5.21524e-264	1.52929	0.998	0.357	1.08081e-259
GIHCG	7.06056e-264	1.66846	0.88	0.147	1.46323e-259
MYL12B	2.47789e-263	1.62373	0.826	0.123	5.13519e-259
TOMM6	4.30943e-263	1.59464	0.814	0.116	8.93087e-259
GADD45A	2.03342e-262	1.6375	0.692	0.048	4.21406e-258
RABAC1	2.57485e-261	1.62584	0.722	0.073	5.33613e-257
CLNS1A	4.02032e-261	1.59036	0.694	0.057	8.33171e-257
CREG1	1.35575e-260	1.56043	0.649	0.038	2.80965e-256
TOMM22	2.71816e-260	1.61152	0.724	0.076	5.63312e-256
OCIAD2	4.75406e-260	1.59393	0.607	0.023	9.85231e-256
SF3B6	6.42676e-260	1.60468	0.877	0.15	1.33188e-255
OST4	9.68612e-260	1.63141	0.84	0.123	2.00735e-255
RPS15A	1.45398e-259	1.58444	0.998	0.335	3.01323e-255
BEX3	8.10116e-259	1.61701	0.564	0.009	1.67888e-254
LAPTM4A	3.36177e-258	1.60755	0.815	0.118	6.96692e-254
NHP2	2.34129e-257	1.62172	0.68	0.059	4.8521e-253
RPL22	3.04109e-257	1.71896	0.993	0.251	6.30235e-253
MLF1	6.26014e-257	1.57335	0.789	0.102	1.29735e-252
MDH2	1.02715e-255	1.58293	0.725	0.08	2.12867e-251
SELL	2.86577e-254	1.65168	0.588	0.021	5.93902e-250
PTGER4	4.1999e-253	-2.56013	0.507	0.888	8.70388e-249
DDOST	1.73794e-252	1.61047	0.7	0.071	3.6017e-248
PTRHD1	2.22592e-252	1.56581	0.683	0.062	4.613e-248
SF3B5	4.50535e-252	1.48672	0.833	0.126	9.33689e-248
NPW	6.58213e-252	1.74372	0.573	0.014	1.36408e-247
NDUFS4	1.0924e-251	1.57242	0.609	0.032	2.26389e-247
ISCA1	1.91368e-251	1.55294	0.6	0.026	3.9659e-247
MZT2A	1.02163e-250	1.61146	0.653	0.053	2.11723e-246
SRSF9	1.1721e-250	1.48466	0.863	0.145	2.42906e-246
ATP5MG	4.40531e-250	1.63955	0.964	0.201	9.12956e-246
PSME1	8.47717e-250	1.57709	0.81	0.128	1.75681e-245
RPS10	1.74997e-249	1.67901	0.978	0.205	3.62665e-245
RPL26	1.11966e-248	1.57744	1	0.346	2.32038e-244
OLA1	1.07991e-247	1.57211	0.643	0.047	2.23801e-243
NOP10	2.37518e-247	1.51003	0.723	0.081	4.92233e-243
EEF1G	9.85051e-247	1.57221	1	0.309	2.04142e-242
DDAH2	3.66939e-246	1.53772	0.735	0.08	7.60444e-242
RPL4	1.79233e-245	1.63218	0.998	0.275	3.71443e-241
PPA1	3.90375e-245	1.5793	0.793	0.117	8.09013e-241
CASP4	5.73597e-244	1.54496	0.569	0.02	1.18872e-239
RANBP1	2.47551e-243	1.58594	0.665	0.061	5.13025e-239
DDT	6.20768e-243	1.57864	0.749	0.102	1.28648e-238
SYNGR1	4.79054e-242	1.51594	0.737	0.094	9.92792e-238
RBM39	1.06923e-241	-1.20382	0.972	0.943	2.21586e-237
TXNIP	2.2691e-241	1.58952	0.858	0.146	4.70248e-237
RPL30	1.45728e-240	1.54095	1	0.333	3.02006e-236
NDUFB8	1.50426e-240	1.55237	0.713	0.086	3.11742e-236
RPS12	1.2464e-239	1.54636	1	0.341	2.58304e-235
POLR1D	9.1462e-239	1.52006	0.92	0.189	1.89546e-234
SRM	1.4404e-238	1.54944	0.66	0.061	2.98508e-234
CCT4	3.77153e-237	1.45237	0.851	0.146	7.81612e-233
PHB2	5.64868e-237	1.43022	0.795	0.121	1.17063e-232
NOP53	7.27086e-237	1.52029	0.964	0.239	1.50681e-232
SERPINB1	1.65939e-236	1.58512	0.946	0.221	3.43891e-232
PRTN3	2.87409e-236	2.00522	0.512	0.005	5.95627e-232
SIVA1	1.17093e-235	1.43734	0.674	0.068	2.42664e-231
RPS3A	4.46229e-235	1.3369	1	0.45	9.24765e-231
CD37	6.19825e-235	1.49756	0.898	0.177	1.28453e-230
LY6E	8.43689e-235	1.65466	0.591	0.036	1.74846e-230
RPL28	1.66958e-234	-0.781675	1	0.972	3.46004e-230
ITM2B	1.68928e-234	1.48744	0.883	0.171	3.50086e-230
NFKBIA	2.43777e-234	-1.76604	0.847	0.911	5.05203e-230
PSMA2	1.01471e-233	1.45558	0.737	0.099	2.10289e-229
SNRPD1	1.30345e-233	1.46299	0.708	0.082	2.70127e-229
COMT	1.71431e-233	1.53666	0.705	0.086	3.55274e-229
SNRPE	2.34382e-233	1.48279	0.666	0.069	4.85733e-229
APEX1	1.09846e-232	1.4089	0.84	0.139	2.27645e-228
NME1	2.27744e-232	1.56382	0.621	0.052	4.71976e-228
SEC11A	2.68715e-232	1.47116	0.743	0.104	5.56884e-228
EIF3D	2.96775e-232	1.41175	0.89	0.177	6.15036e-228
RBM3	3.0456e-231	1.45559	0.953	0.22	6.3117e-227
CD96	6.04539e-231	1.47613	0.502	0.005	1.25285e-226
TBCA	7.33885e-231	1.50968	0.749	0.112	1.5209e-226
IGBP1	1.87095e-230	1.49353	0.598	0.042	3.87735e-226
COX6C	5.76065e-230	1.48404	0.838	0.145	1.19384e-225
RPS27A	1.41281e-229	1.41159	1	0.394	2.9279e-225
MYDGF	3.84667e-229	1.49748	0.705	0.09	7.97185e-225
PHB	6.04763e-229	1.4856	0.604	0.045	1.25331e-224
EIF3I	7.07109e-229	1.43184	0.788	0.126	1.46541e-224
RPS13	6.54298e-228	1.37714	0.995	0.396	1.35597e-223
TMEM230	1.71592e-227	1.43429	0.628	0.055	3.55606e-223
TOMM7	5.98265e-227	1.46587	0.95	0.203	1.23984e-222
COX5B	1.10483e-226	1.46441	0.87	0.166	2.28964e-222
AC020916.1	8.18474e-226	-1.69412	0.858	0.929	1.6962e-221
NDUFB11	1.84696e-225	1.47673	0.797	0.137	3.82764e-221
UQCRB	2.0979e-225	1.55152	0.965	0.245	4.3477e-221
SNRPF	1.55367e-224	1.47633	0.772	0.122	3.21983e-220
ESD	1.65579e-224	1.43927	0.633	0.057	3.43146e-220
TMEM14C	3.01016e-224	1.45361	0.564	0.033	6.23825e-220
DAD1	3.95214e-224	1.4975	0.592	0.045	8.19042e-220
EIF3M	5.0337e-224	1.41987	0.872	0.18	1.04318e-219
RPS4X	5.54188e-224	1.3301	1	0.443	1.1485e-219
RPL36AL	7.22998e-224	1.50407	0.977	0.246	1.49834e-219
RPL3	7.57571e-224	1.31278	1	0.438	1.56999e-219
SSR2	6.04543e-222	1.35064	0.847	0.156	1.25286e-217
LEPROTL1	6.66772e-222	1.43885	0.632	0.059	1.38182e-217
EMID1	6.63089e-221	1.36193	0.498	0.009	1.37419e-216
TIMM13	7.34311e-221	1.35304	0.78	0.123	1.52179e-216
RPL19	1.4507e-220	1.32842	0.999	0.394	3.00644e-216
CD81	2.43788e-220	1.42478	0.634	0.061	5.05225e-216
SLC25A6	2.82895e-220	1.4744	0.978	0.245	5.86271e-216
RPL5	1.19009e-219	1.2201	1	0.466	2.46634e-215
THOC7	1.43448e-219	1.42675	0.621	0.06	2.97282e-215
RPS7	8.02682e-219	1.25564	1	0.442	1.66348e-214
RPLP0	3.87341e-218	1.40002	0.998	0.366	8.02725e-214
SRP14	7.80021e-218	1.49418	0.962	0.24	1.61652e-213
RPL35A	9.82871e-218	1.30322	1	0.424	2.0369e-213
FOS	5.24955e-217	-1.33661	0.946	0.915	1.08792e-212
CCT8	6.69328e-217	1.35096	0.757	0.113	1.38712e-212
RPS25	1.2063e-216	1.41497	0.999	0.35	2.49993e-212
RPL7A	1.21873e-216	1.30616	1	0.421	2.5257e-212
ABRACL	4.97153e-216	1.42836	0.565	0.04	1.0303e-211
ANAPC16	2.21282e-215	1.39788	0.679	0.09	4.58584e-211
RPS6	2.46131e-215	1.3448	1	0.411	5.10083e-211
TSTD1	3.23646e-214	1.41438	0.506	0.018	6.70723e-210
LDHA	8.87326e-214	1.39205	0.87	0.174	1.8389e-209
GDI2	1.41832e-213	1.37526	0.764	0.123	2.93932e-209
JTB	2.00225e-213	1.33725	0.715	0.101	4.14947e-209
FTL	8.14105e-213	1.40567	0.998	0.328	1.68715e-208
NEDD8	1.08969e-212	1.40426	0.762	0.129	2.25828e-208
CYTOR	3.22755e-212	1.32224	0.683	0.08	6.68878e-208
RPL18	4.0384e-212	1.45684	1	0.333	8.36918e-208
C1QTNF4	1.09454e-211	1.49712	0.51	0.016	2.26833e-207
RPL9	2.24821e-211	1.36099	1	0.382	4.65919e-207
GAS5	2.31191e-211	1.40179	0.994	0.34	4.79121e-207
YBX1	2.3143e-211	1.45372	0.978	0.289	4.79615e-207
DDX3X	3.42753e-211	-1.575	0.901	0.901	7.10322e-207
CLTA	6.37335e-211	1.32969	0.645	0.07	1.32081e-206
NENF	9.17664e-211	1.39235	0.639	0.072	1.90177e-206
LYL1	1.00428e-210	1.33595	0.648	0.068	2.08128e-206
PSMB1	1.17562e-210	1.27786	0.81	0.149	2.43635e-206
PSMB6	2.26476e-210	1.30633	0.616	0.06	4.69348e-206
CCT7	3.03618e-210	1.41831	0.574	0.048	6.29219e-206
MTHFD2L	4.0633e-210	1.32864	0.548	0.032	8.42079e-206
CKLF	5.04498e-210	1.4433	0.593	0.056	1.04552e-205
RPL27	1.58287e-209	1.48681	0.998	0.282	3.28034e-205
LSM3	4.01415e-209	1.41518	0.598	0.058	8.31893e-205
MPC2	9.84168e-209	1.34087	0.7	0.099	2.03959e-204
PAIP2	1.72048e-208	1.27668	0.787	0.13	3.56552e-204
GNG5	5.29568e-208	1.3495	0.774	0.137	1.09748e-203
NBDY	2.41899e-207	1.3418	0.524	0.028	5.01312e-203
LSM5	3.4798e-207	1.38876	0.605	0.062	7.21154e-203
HIGD2A	3.78188e-207	1.36363	0.801	0.146	7.83756e-203
TMEM258	4.6897e-207	1.36142	0.778	0.136	9.71893e-203
SNRPB	1.13598e-205	1.34974	0.839	0.173	2.3542e-201
IRF2BP2	7.63793e-205	-1.38737	0.909	0.893	1.58288e-200
ACP1	1.14859e-204	1.28725	0.597	0.055	2.38033e-200
PTMA	1.17763e-204	-0.82	1	0.958	2.44053e-200
SNU13	1.71882e-204	1.3027	0.771	0.132	3.56209e-200
C9orf16	1.9306e-204	1.302	0.874	0.191	4.00097e-200
C11orf1	3.30792e-204	1.36937	0.467	0.01	6.85533e-200
CALHM6	5.80035e-204	1.30909	0.435	0	1.20206e-199
KLF4	1.37208e-203	-3.03756	0.145	0.746	2.84349e-199
HNRNPH1	3.5606e-203	-1.18541	0.967	0.888	7.37899e-199
ERP29	1.49511e-202	1.33785	0.837	0.177	3.09847e-198
FIS1	2.07168e-202	1.35306	0.666	0.091	4.29334e-198
FAU	2.77006e-202	1.31813	1	0.368	5.74067e-198
NME4	6.02595e-202	1.31906	0.561	0.042	1.24882e-197
RBIS	7.66063e-202	1.31928	0.714	0.113	1.58759e-197
POMP	1.66449e-201	1.33526	0.679	0.1	3.4495e-197
RPL7	1.80244e-201	1.33187	0.999	0.373	3.73538e-197
SEPTIN6	3.83556e-201	1.23586	0.849	0.176	7.94881e-197
NDUFB2	5.99897e-201	1.35384	0.669	0.098	1.24323e-196
RPS23	6.93722e-201	1.25955	1	0.428	1.43767e-196
RAB32	7.69043e-201	1.35636	0.597	0.058	1.59376e-196
IL18	2.28576e-200	1.23825	0.603	0.056	4.73701e-196
TFDP2	3.44012e-200	1.25841	0.592	0.053	7.12931e-196
EIF2S3	3.75166e-200	1.30502	0.921	0.222	7.77494e-196
TUBB	4.78956e-200	1.27794	0.725	0.114	9.92589e-196
KLF6	5.56987e-200	-1.09725	0.971	0.917	1.1543e-195
SLC38A2	1.6352e-199	-1.8935	0.708	0.85	3.38878e-195
ATP5PB	4.73639e-199	1.29176	0.666	0.091	9.8157e-195
EID1	6.09534e-199	1.34611	0.651	0.088	1.2632e-194
TMSB4X	1.24404e-198	-1.04304	0.99	0.911	2.57815e-194
VDAC1	2.3067e-198	1.33479	0.527	0.036	4.78041e-194
STOML2	4.11736e-198	1.28565	0.579	0.055	8.53281e-194
NDUFC2	5.75659e-198	1.33847	0.656	0.091	1.193e-193
C19orf53	7.16974e-198	1.28214	0.703	0.111	1.48586e-193
VDAC2	9.52279e-198	1.24747	0.846	0.173	1.9735e-193
EVA1B	1.67592e-197	1.31484	0.584	0.054	3.47318e-193
TMEM123	2.00804e-197	1.26534	0.643	0.078	4.16147e-193
SOX4	8.30824e-197	1.3295	0.846	0.167	1.7218e-192
ITM2C	2.41373e-196	1.44303	0.493	0.025	5.00222e-192
SELENOH	2.0942e-195	1.25747	0.845	0.177	4.34003e-191
UBE2S	2.24198e-195	1.21795	0.793	0.145	4.64627e-191
CD44	2.80986e-195	-1.42692	0.902	0.884	5.82315e-191
TUBA1B	3.46148e-195	1.32983	0.885	0.203	7.17356e-191
ATP5MC2	3.63895e-195	1.42688	0.992	0.285	7.54136e-191
MRPS33	5.95972e-195	1.30634	0.535	0.041	1.23509e-190
RPS14	6.85222e-195	1.30161	1	0.402	1.42005e-190
SSR4	9.62442e-195	1.29654	0.903	0.221	1.99456e-190
TMEM219	1.06174e-194	1.28997	0.611	0.07	2.20034e-190
UQCRFS1	2.26504e-194	1.22952	0.74	0.124	4.69407e-190
RPS20	4.6031e-194	1.38712	0.976	0.264	9.53947e-190
WDR74	2.29436e-193	-2.86721	0.228	0.761	4.75484e-189
CUTA	1.01433e-192	1.21681	0.769	0.142	2.1021e-188
GADD45GIP1	4.37514e-192	1.19665	0.676	0.095	9.06703e-188
PABPC1	5.18802e-192	-0.830931	0.996	0.928	1.07516e-187
TMEM256	9.49727e-192	1.37565	0.59	0.068	1.96821e-187
ETHE1	3.52794e-191	1.29346	0.484	0.024	7.31131e-187
PTGES3	4.45343e-191	1.26878	0.771	0.145	9.22929e-187
TOMM20	4.68994e-191	1.26218	0.916	0.227	9.71943e-187
COX6A1	2.6547e-190	1.23866	0.775	0.151	5.50159e-186
TATDN1	4.55938e-190	1.25847	0.5	0.03	9.44886e-186
RPL22L1	5.03928e-190	1.29691	0.874	0.204	1.04434e-185
RPL15	6.171e-190	1.09317	1	0.502	1.27888e-185
CHCHD2	9.27472e-190	1.34283	0.969	0.275	1.92209e-185
GRHPR	1.61636e-189	1.19697	0.567	0.051	3.34974e-185
MRPS36	2.30677e-189	1.29232	0.49	0.028	4.78054e-185
PGLS	1.21017e-188	1.2602	0.765	0.153	2.50795e-184
MDK	1.50084e-188	1.33666	0.42	0.004	3.11034e-184
TENT5C	2.834e-188	1.26358	0.511	0.034	5.87319e-184
ECHS1	2.98394e-188	1.25049	0.559	0.055	6.18393e-184
H3F3B	3.10824e-188	-0.687579	1	0.966	6.44151e-184
SNRPD2	4.17901e-188	1.22681	0.846	0.189	8.66058e-184
SNRPC	1.35609e-187	1.25657	0.596	0.07	2.81037e-183
PDZD8	4.01748e-187	1.32636	0.558	0.05	8.32582e-183
RPL24	6.20272e-187	1.19288	1	0.424	1.28545e-182
RPL39	8.39553e-187	1.09305	1	0.406	1.73989e-182
LSM7	8.52808e-187	1.24069	0.847	0.193	1.76736e-182
GMFG	8.79152e-187	1.28375	0.872	0.192	1.82195e-182
DRAP1	1.45451e-186	1.17775	0.776	0.151	3.01432e-182
ZFP36	1.60108e-186	-1.83333	0.651	0.841	3.31808e-182
LGALS3BP	3.58045e-186	1.3242	0.425	0.006	7.42013e-182
PFDN2	9.71505e-186	1.21459	0.792	0.159	2.01335e-181
PSMC5	1.96917e-185	1.25603	0.581	0.067	4.0809e-181
ATP5MD	8.83121e-185	1.2766	0.715	0.124	1.83018e-180
PYCARD	1.48562e-184	1.33044	0.719	0.13	3.07879e-180
TMEM14B	1.66093e-184	1.29373	0.488	0.032	3.44212e-180
TMEM147	2.12021e-184	1.2555	0.533	0.047	4.39393e-180
DNPH1	3.55267e-184	1.31508	0.489	0.033	7.36255e-180
RPL34	1.20778e-183	1.16577	1	0.412	2.50301e-179
FBL	2.06144e-183	1.215	0.705	0.123	4.27213e-179
ATRAID	2.35022e-183	1.2604	0.538	0.049	4.8706e-179
ATP5MC1	5.21647e-183	1.29563	0.651	0.1	1.08106e-178
RWDD1	7.44249e-183	1.22272	0.567	0.059	1.54238e-178
FAM162A	7.46019e-183	1.24833	0.556	0.058	1.54605e-178
PFDN4	1.51293e-182	1.27384	0.516	0.044	3.13539e-178
GLRX5	3.41717e-182	1.19466	0.55	0.053	7.08175e-178
MT-ATP8	5.54051e-182	-2.26079	0.516	0.824	1.14821e-177
RPL36A	6.24282e-182	1.2625	0.999	0.329	1.29376e-177
PPIB	7.42609e-182	1.22079	0.794	0.166	1.53898e-177
MLF2	2.49685e-181	1.15381	0.735	0.135	5.17448e-177
RNF7	2.51593e-181	1.22997	0.655	0.1	5.21402e-177
PSMG2	2.81075e-181	1.16728	0.622	0.083	5.82499e-177
DCTN3	3.277e-181	1.22196	0.59	0.073	6.79125e-177
KDELR1	3.91615e-180	1.21981	0.586	0.07	8.11582e-176
UQCR11	7.42592e-180	1.24407	0.783	0.152	1.53895e-175
ATP6V1F	2.28176e-179	1.22618	0.76	0.153	4.72873e-175
CCNG1	2.68702e-179	1.2427	0.51	0.041	5.56859e-175
ATP2C1	8.23414e-179	1.11482	0.68	0.1	1.70644e-174
RPS3	1.1871e-178	1.13766	1	0.491	2.46015e-174
RAN	2.30032e-178	1.16351	0.893	0.22	4.76718e-174
ANP32B	2.80842e-178	1.1788	0.858	0.201	5.82016e-174
RAB5C	3.21916e-178	1.22263	0.527	0.047	6.67139e-174
GSTO1	5.94352e-178	1.15694	0.659	0.102	1.23174e-173
EIF4H	6.19861e-178	1.11602	0.726	0.131	1.2846e-173
TRIR	6.4411e-178	1.20337	0.806	0.176	1.33485e-173
SERP1	9.49871e-178	1.23001	0.892	0.218	1.96851e-173
PSMB7	3.64145e-177	1.22938	0.576	0.07	7.54654e-173
RPS16	1.55499e-176	1.25644	1	0.376	3.22256e-172
SCCPDH	2.16185e-176	1.19412	0.443	0.019	4.48022e-172
YWHAQ	6.2523e-176	1.12578	0.755	0.148	1.29573e-171
RAP1B	6.62135e-176	1.10342	0.749	0.135	1.37221e-171
AKIRIN1	2.70184e-175	1.09182	0.747	0.138	5.59929e-171
CNBP	4.51613e-175	1.13593	0.669	0.11	9.35923e-171
SELENOP	5.46791e-175	1.19493	0.379	0	1.13317e-170
PSME2	5.71223e-175	1.23068	0.581	0.075	1.1838e-170
CIRBP	8.71685e-175	1.15524	0.919	0.241	1.80648e-170
PRMT1	9.05583e-175	1.17019	0.653	0.103	1.87673e-170
PITHD1	3.43127e-174	1.16905	0.545	0.056	7.11096e-170
RUNX1	8.32738e-174	1.07308	0.719	0.123	1.72577e-169
BCAP31	9.15844e-174	1.19807	0.625	0.098	1.898e-169
PDCD2	1.6155e-173	1.18443	0.495	0.04	3.34797e-169
NCF1	1.97701e-173	-3.10214	0.027	0.628	4.09716e-169
NOL7	2.98888e-173	1.09322	0.567	0.064	6.19415e-169
HMGN3	3.83819e-173	1.10237	0.705	0.126	7.95427e-169
RFLNB	1.03656e-172	1.21484	0.671	0.112	2.14817e-168
MIF	2.45744e-172	1.27584	0.976	0.313	5.0928e-168
CCNB1IP1	3.95272e-172	1.10575	0.649	0.099	8.19161e-168
CHURC1	7.09684e-172	1.20041	0.599	0.085	1.47075e-167
NDUFA11	8.18964e-172	1.10217	0.808	0.184	1.69722e-167
PSMA7	1.1084e-171	1.10528	0.795	0.173	2.29706e-167
ARHGDIB	1.43734e-171	1.16639	0.862	0.206	2.97875e-167
MRPS21	2.82253e-171	1.17956	0.599	0.086	5.84941e-167
SSR3	2.84571e-171	1.13837	0.558	0.064	5.89746e-167
RPS17	3.0293e-171	1.27468	0.987	0.26	6.27792e-167
LSM4	3.96148e-171	1.17296	0.559	0.066	8.20978e-167
TAF9	6.93712e-171	1.00284	0.686	0.107	1.43765e-166
PSMB3	7.7275e-171	1.18224	0.643	0.107	1.60145e-166
CDC42EP3	1.05273e-170	-2.67411	0.188	0.704	2.18169e-166
RPS21	1.1291e-170	1.17369	0.999	0.36	2.33994e-166
SET	5.13798e-170	1.19566	0.96	0.269	1.06479e-165
SSBP1	6.31889e-170	1.05024	0.697	0.12	1.30953e-165
AHCY	2.4105e-169	1.1901	0.461	0.031	4.99552e-165
KRTCAP2	2.55884e-169	1.07785	0.712	0.135	5.30295e-165
SRP72	2.58771e-169	1.10725	0.651	0.106	5.36276e-165
CHD2	4.53065e-169	-1.83949	0.642	0.822	9.38931e-165
NDUFB10	1.22456e-168	1.15266	0.673	0.122	2.53777e-164
TPSB2	1.23779e-168	1.19961	0.407	0.011	2.56519e-164
BUD31	1.58308e-168	1.10938	0.709	0.134	3.28077e-164
TPM4	1.857e-168	1.06973	0.759	0.141	3.84845e-164
SNHG16	5.89421e-168	1.05724	0.627	0.094	1.22152e-163
PRELID1	7.10694e-168	1.15914	0.749	0.158	1.47284e-163
PSMA5	3.21953e-167	1.16545	0.531	0.058	6.67216e-163
NDUFB4	3.66821e-167	1.19209	0.571	0.079	7.602e-163
ZCRB1	5.18289e-167	1.13803	0.485	0.039	1.0741e-162
HMGA1	7.94137e-167	1.12221	0.858	0.203	1.64577e-162
PAFAH1B3	9.4422e-167	1.12853	0.407	0.013	1.9568e-162
SOD1	2.2279e-166	1.17889	0.536	0.061	4.6171e-162
RNASET2	3.37671e-166	1.1376	0.849	0.213	6.9979e-162
HHEX	4.58325e-166	1.12215	0.616	0.087	9.49832e-162
UQCR10	3.26205e-165	1.20043	0.573	0.079	6.76028e-161
MAGOH	2.11051e-164	1.15684	0.529	0.061	4.37382e-160
MCL1	3.47239e-164	-0.951765	0.977	0.887	7.19618e-160
BST2	1.41107e-163	1.24636	0.726	0.157	2.9243e-159
ATP5PD	4.07712e-163	1.21298	0.516	0.059	8.44941e-159
TNFAIP2	5.0363e-163	-2.83781	0.185	0.693	1.04372e-158
ATP5F1A	7.53064e-163	1.01701	0.817	0.182	1.56065e-158
MAZ	1.0792e-162	1.09776	0.774	0.17	2.23653e-158
SYPL1	1.699e-162	1.10897	0.643	0.107	3.52101e-158
TXNL4A	2.91895e-162	1.16348	0.484	0.044	6.04924e-158
MRPS24	3.20499e-162	1.05274	0.678	0.123	6.64202e-158
RTN3	3.24533e-162	1.15337	0.535	0.063	6.72562e-158
DNAJC1	3.95219e-162	1.08296	0.69	0.128	8.19052e-158
ATP5MF	4.03592e-162	1.16547	0.671	0.124	8.36405e-158
SMS	4.12127e-162	1.16143	0.492	0.047	8.54092e-158
CCT3	9.90688e-162	1.16419	0.522	0.061	2.0531e-157
MAX	1.54246e-161	1.00123	0.627	0.093	3.19659e-157
STRAP	4.7757e-161	1.07948	0.753	0.162	9.89717e-157
UQCRQ	6.27823e-161	1.13916	0.654	0.114	1.3011e-156
ERGIC3	7.26446e-161	1.1121	0.609	0.096	1.50549e-156
BTF3L4	1.11233e-160	1.09466	0.517	0.057	2.30519e-156
UBE2L3	1.83357e-160	1.04703	0.649	0.112	3.79988e-156
JMJD1C	2.73848e-160	-1.36675	0.889	0.869	5.67522e-156
IGFBP2	2.94152e-160	1.25614	0.35	0	6.096e-156
MRPL11	3.27726e-160	1.19844	0.467	0.041	6.79179e-156
ATP5MC3	2.72023e-159	1.11733	0.891	0.241	5.6374e-155
SLBP	8.667e-159	1.14282	0.536	0.063	1.79615e-154
TXN2	1.18376e-158	1.16079	0.499	0.054	2.45323e-154
HEBP1	1.30369e-158	1.13163	0.404	0.018	2.70176e-154
CCDC85B	1.32072e-158	1.13305	0.63	0.108	2.73706e-154
TMED3	1.67038e-158	1.1871	0.471	0.043	3.4617e-154
CAT	2.22694e-158	1.13832	0.869	0.229	4.61512e-154
PPP1R15B	2.37869e-158	-2.21579	0.443	0.765	4.9296e-154
RSL1D1	2.86251e-158	1.05761	0.87	0.221	5.93227e-154
ANAPC11	5.22467e-158	1.17149	0.518	0.064	1.08276e-153
COPS9	5.62934e-158	1.1809	0.552	0.078	1.16662e-153
RPL32	6.69316e-158	1.01435	1	0.503	1.38709e-153
ILF2	7.73585e-158	1.01989	0.795	0.183	1.60318e-153
AP2M1	1.00974e-157	1.15176	0.58	0.09	2.09259e-153
YTHDF2	1.26302e-157	1.01941	0.643	0.112	2.61747e-153
TOMM5	1.29629e-157	1.11395	0.494	0.053	2.68644e-153
SAMHD1	1.43908e-157	-2.83754	0.018	0.584	2.98236e-153
STMP1	3.50939e-157	1.05909	0.691	0.137	7.27286e-153
BRK1	4.23204e-157	1.17568	0.605	0.103	8.77048e-153
LAMTOR4	4.78193e-157	1.05646	0.833	0.205	9.91008e-153
PLP2	5.21253e-157	1.07435	0.789	0.187	1.08024e-152
PQBP1	5.46467e-157	1.11363	0.522	0.063	1.1325e-152
BEX4	1.41605e-156	1.07707	0.557	0.076	2.93462e-152
NDUFAF8	2.2256e-156	1.09775	0.544	0.075	4.61233e-152
MYL6B	2.58155e-156	1.13922	0.438	0.032	5.35e-152
SARAF	2.70205e-156	1.02578	0.792	0.185	5.59974e-152
MEAF6	4.8801e-156	1.0876	0.46	0.039	1.01135e-151
HCST	6.44095e-156	1.11499	0.837	0.19	1.33482e-151
RPS26	6.97463e-156	1.13655	1	0.381	1.44542e-151
ITGAE	7.00561e-156	1.13569	0.495	0.053	1.45184e-151
IDH2	1.03681e-155	1.09019	0.5	0.054	2.14869e-151
ZNF428	1.09507e-155	1.04127	0.615	0.1	2.26943e-151
RPL10	1.38452e-155	0.9795	1	0.539	2.86927e-151
MRPL4	4.07428e-155	1.02959	0.571	0.083	8.44354e-151
GTF3C6	6.63722e-155	1.09632	0.458	0.039	1.3755e-150
ORAI3	1.38863e-154	1.1482	0.453	0.038	2.8778e-150
CRBN	1.63832e-154	1.01807	0.49	0.047	3.39525e-150
AC002454.1	3.38692e-154	1.11083	0.338	0	7.01905e-150
HADHA	5.78147e-154	1.0548	0.639	0.115	1.19815e-149
COMMD7	6.42872e-154	1.04295	0.576	0.086	1.33229e-149
MS4A4E	1.17904e-153	-2.98671	0.006	0.565	2.44344e-149
SRSF11	1.25523e-153	-1.44888	0.828	0.841	2.60134e-149
PA2G4	1.42153e-153	1.04329	0.663	0.125	2.94597e-149
TMED2	3.14322e-153	1.0934	0.492	0.053	6.51401e-149
HNRNPA0	5.40869e-153	1.00363	0.816	0.205	1.1209e-148
ACTG1	1.2188e-152	1.15175	0.996	0.392	2.52583e-148
RAC2	2.32994e-152	1.08452	0.768	0.173	4.82857e-148
CLIC1	2.66913e-152	1.20078	0.982	0.338	5.5315e-148
ZFAND1	3.45755e-152	1.04616	0.441	0.034	7.16543e-148
MYL12A	3.99018e-152	1.06426	0.692	0.14	8.26925e-148
GNB4	3.9335e-151	1.01702	0.429	0.027	8.15179e-147
COX6B1	6.29648e-151	1.0963	0.881	0.229	1.30488e-146
HLA-DPA1	6.73149e-151	1.21261	0.663	0.134	1.39503e-146
TSC22D1	9.5107e-151	1.14662	0.522	0.06	1.971e-146
SELENOF	9.7603e-151	1.09609	0.467	0.047	2.02272e-146
GTF2B	5.46423e-150	1.032	0.616	0.103	1.13241e-145
TRAPPC6A	1.23706e-149	1.06613	0.585	0.097	2.56368e-145
IFITM2	1.55546e-149	1.11601	0.634	0.122	3.22353e-145
CYBA	1.59686e-149	-0.82911	0.977	0.878	3.30934e-145
SMDT1	2.01503e-149	1.06963	0.487	0.055	4.17595e-145
MLC1	2.22184e-149	1.08029	0.328	0	4.60454e-145
RYBP	2.35805e-149	1.03898	0.524	0.064	4.88682e-145
ICAM3	6.5594e-149	1.03704	0.772	0.184	1.35937e-144
MICOS13	8.48647e-149	0.994665	0.66	0.126	1.75874e-144
CDK2AP1	2.01375e-148	1.11821	0.453	0.043	4.17329e-144
BCL11A	2.76426e-148	1.02606	0.476	0.047	5.72865e-144
CANX	2.84214e-148	1.01252	0.718	0.16	5.89006e-144
XRCC6	3.09009e-148	1.00321	0.651	0.128	6.40389e-144
EIF4B	3.1688e-148	1.04609	0.892	0.249	6.56701e-144
HDGF	6.51378e-148	1.01505	0.623	0.114	1.34992e-143
C19orf48	6.52908e-148	1.00536	0.482	0.048	1.35309e-143
ARL6IP4	8.19849e-148	0.9839	0.855	0.227	1.69905e-143
RPS28	1.57082e-147	1.09691	1	0.386	3.25537e-143
AC007952.4	1.88718e-147	-2.78879	0.117	0.626	3.91099e-143
ZFAND5	2.65741e-147	-1.69628	0.705	0.801	5.50722e-143
GABARAP	2.88021e-147	1.04279	0.877	0.238	5.96896e-143
TUFM	4.0093e-147	0.942529	0.809	0.206	8.30887e-143
FOXC1	5.5531e-147	1.09817	0.323	0	1.15082e-142
RPL11	8.45383e-147	0.976662	1	0.514	1.75197e-142
UBE2L6	8.55534e-147	1.08631	0.37	0.014	1.77301e-142
NUDT1	1.96742e-146	1.0505	0.55	0.08	4.07729e-142
SELENOK	2.66485e-146	1.01005	0.65	0.125	5.52264e-142
ERH	7.00257e-146	1.0906	0.488	0.06	1.45121e-141
CST7	8.72568e-146	1.17439	0.321	0	1.80831e-141
NOB1	1.01805e-145	1.04013	0.389	0.02	2.10982e-141
RPS19BP1	1.06602e-145	0.997838	0.535	0.077	2.20922e-141
NIT2	1.40303e-145	0.998804	0.436	0.036	2.90764e-141
URI1	2.00078e-145	1.05908	0.466	0.048	4.14642e-141
MED28	1.26516e-144	0.93083	0.541	0.074	2.62191e-140
TPRKB	1.36219e-144	1.02794	0.368	0.015	2.82299e-140
ABHD14B	3.95452e-144	0.987115	0.6	0.103	8.19535e-140
RPS19	1.03457e-143	1.01518	1	0.476	2.14405e-139
RPLP1	1.1742e-143	0.811509	1	0.531	2.43342e-139
ZNF277	3.77056e-143	1.03017	0.378	0.018	7.81411e-139
PUF60	6.49937e-143	0.963544	0.571	0.093	1.34693e-138
TRMT112	7.74619e-143	1.07524	0.57	0.099	1.60532e-138
PLIN3	9.70217e-143	0.933781	0.599	0.104	2.01068e-138
COX8A	1.35457e-142	1.03332	0.778	0.183	2.80721e-138
WASF2	1.94773e-142	0.974884	0.54	0.077	4.03648e-138
TMBIM6	2.02276e-142	0.994495	0.735	0.173	4.19198e-138
POLR2F	2.47324e-142	1.04532	0.415	0.033	5.12554e-138
PCBD1	2.50404e-142	1.07954	0.395	0.028	5.18937e-138
EDF1	3.67912e-142	1.01951	0.921	0.279	7.6246e-138
ZNF593	7.28627e-142	1.03435	0.559	0.092	1.51001e-137
PRSS21	1.37249e-141	0.924394	0.546	0.079	2.84435e-137
ARPC5L	1.92302e-141	0.885005	0.679	0.136	3.98527e-137
MAPRE1	3.76568e-141	0.945518	0.673	0.143	7.804e-137
SPTBN1	4.4973e-141	1.04024	0.413	0.03	9.32021e-137
ALYREF	6.81723e-141	0.988225	0.638	0.127	1.4128e-136
CUEDC2	6.89376e-141	1.00124	0.473	0.056	1.42866e-136
BCAS2	9.759e-141	1.02906	0.492	0.061	2.02246e-136
SSBP2	1.53103e-140	1.01758	0.39	0.024	3.17292e-136
GMPR2	2.84628e-140	1.02439	0.362	0.016	5.89862e-136
PLEK	3.23457e-140	-1.56052	0.755	0.791	6.70332e-136
CHID1	5.77201e-140	1.05779	0.416	0.035	1.19619e-135
PSMA1	7.81112e-140	0.946869	0.769	0.191	1.61878e-135
UBE2V1	9.41437e-140	0.964429	0.574	0.098	1.95103e-135
CDK6	1.01399e-139	0.911669	0.766	0.186	2.1014e-135
DYNLL2	1.39475e-139	0.948412	0.541	0.08	2.89049e-135
UBL5	4.96311e-139	0.987413	0.749	0.175	1.02855e-134
PAICS	5.01412e-139	0.979759	0.391	0.025	1.03913e-134
RPLP2	6.59664e-139	1.05357	0.998	0.368	1.36709e-134
NDUFA7	8.34867e-139	1.05461	0.444	0.048	1.73018e-134
CSNK2B	9.07621e-139	1.03443	0.593	0.112	1.88095e-134
TSPO	1.81921e-138	1.03368	0.867	0.22	3.77014e-134
MED30	2.52214e-138	0.99134	0.465	0.053	5.22688e-134
HNRNPAB	3.30602e-138	0.934814	0.619	0.119	6.8514e-134
SLC39A3	4.09414e-138	1.06726	0.37	0.021	8.4847e-134
HIF1A	5.99637e-138	-1.88569	0.585	0.765	1.24269e-133
VAMP8	6.86202e-138	1.05382	0.862	0.233	1.42209e-133
KHDRBS1	7.30743e-138	0.906072	0.752	0.18	1.51439e-133
JPT1	1.35881e-137	0.988686	0.47	0.055	2.81599e-133
GCSH	1.62595e-137	0.99156	0.329	0.007	3.36962e-133
IAH1	1.8476e-137	1.06477	0.494	0.068	3.82896e-133
MATK	3.15937e-137	0.957308	0.423	0.035	6.54747e-133
PTAFR	3.22591e-137	-2.73416	0.021	0.535	6.68538e-133
ATXN10	3.29941e-137	1.0588	0.401	0.032	6.83769e-133
HNRNPF	3.35633e-137	1.01518	0.504	0.07	6.95565e-133
MGST3	4.75657e-137	0.918767	0.574	0.1	9.85752e-133
DNAJC8	1.00987e-136	0.983902	0.51	0.075	2.09284e-132
CCND2	1.05852e-136	1.01892	0.385	0.024	2.19367e-132
RPS24	1.43438e-136	0.916986	1	0.519	2.97261e-132
SUMO3	1.52672e-136	0.928052	0.575	0.101	3.16398e-132
NPR3	2.80368e-136	1.02462	0.301	0	5.81034e-132
CPVL	4.61833e-136	1.01956	0.362	0.018	9.57104e-132
CNIH1	6.45512e-136	0.946764	0.512	0.073	1.33776e-131
GGCT	6.57133e-136	0.956443	0.42	0.039	1.36184e-131
CCT6A	1.11783e-135	0.922976	0.58	0.104	2.31659e-131
UQCRC2	1.38681e-135	0.885292	0.611	0.117	2.87402e-131
UBXN1	2.40392e-135	0.88961	0.759	0.187	4.98188e-131
FKBP1A	2.96433e-135	1.00505	0.668	0.149	6.14328e-131
NCK1	9.74741e-135	0.961881	0.415	0.035	2.02005e-130
ATP5F1E	2.96325e-134	1.03824	0.975	0.265	6.14103e-130
RPL37	4.64514e-134	0.829434	1	0.506	9.6266e-130
NDUFB1	5.43957e-134	1.01183	0.585	0.109	1.1273e-129
DCP1A	5.68874e-134	0.853985	0.592	0.102	1.17893e-129
RAB13	5.81747e-134	0.972665	0.431	0.042	1.20561e-129
PDRG1	7.07764e-134	0.939498	0.407	0.034	1.46677e-129
MRPL45	7.51735e-134	0.984942	0.367	0.022	1.55789e-129
SNRPB2	1.28769e-133	0.953653	0.542	0.093	2.66861e-129
PDCD5	2.25752e-133	1.01185	0.369	0.024	4.67849e-129
ARPC1B	2.31584e-133	0.99654	0.816	0.223	4.79935e-129
RAC1	2.98691e-133	0.877423	0.762	0.194	6.19006e-129
NDUFA5	3.23607e-133	1.00461	0.438	0.048	6.70644e-129
LDLR	6.41204e-133	-2.7478	0.048	0.546	1.32883e-128
RILPL2	7.42009e-133	0.896431	0.697	0.155	1.53774e-128
EIF2AK2	8.65445e-133	0.940526	0.433	0.045	1.79355e-128
CCDC59	1.40993e-132	0.888262	0.695	0.156	2.92194e-128
NDUFB9	2.07412e-132	0.906434	0.651	0.14	4.2984e-128
TCEAL4	2.17408e-132	0.927359	0.452	0.051	4.50557e-128
PDCD6	2.58725e-132	0.930842	0.453	0.053	5.36181e-128
XRCC5	2.84747e-132	0.914116	0.499	0.069	5.9011e-128
DYNLL1	3.58264e-132	0.993582	0.619	0.127	7.42467e-128
TMA7	8.23711e-132	1.00749	0.944	0.267	1.70706e-127
C12orf10	1.43384e-131	1.01501	0.389	0.031	2.9715e-127
LAGE3	3.0462e-131	1.01209	0.406	0.037	6.31295e-127
SPCS2	3.35275e-131	0.967651	0.446	0.053	6.94824e-127
RPL21	3.60818e-131	0.931423	1	0.504	7.47759e-127
SMYD3	4.13135e-131	1.01188	0.425	0.045	8.5618e-127
RTF2	9.1234e-131	0.954099	0.504	0.077	1.89073e-126
SNHG17	1.70223e-130	0.865703	0.592	0.11	3.5277e-126
MCTS1	1.83945e-130	0.922492	0.446	0.053	3.81208e-126
POLR2I	6.04264e-130	1.01754	0.419	0.045	1.25228e-125
TXNDC5	6.68543e-130	0.971064	0.341	0.016	1.38549e-125
EIF4A1	7.67516e-130	-0.788227	0.99	0.884	1.5906e-125
CLPP	1.199e-129	0.950215	0.423	0.045	2.4848e-125
SEM1	2.73233e-129	0.948252	0.608	0.123	5.66248e-125
GAMT	3.45651e-129	0.843834	0.493	0.068	7.16327e-125
LETMD1	3.59551e-129	0.905742	0.447	0.051	7.45133e-125
MRPL54	6.38401e-129	0.886185	0.586	0.112	1.32302e-124
NAA20	6.57771e-129	0.924305	0.34	0.016	1.36316e-124
BAX	9.51263e-129	0.904013	0.668	0.152	1.9714e-124
PFDN5	1.9719e-128	1.10769	0.992	0.367	4.08657e-124
GLUL	3.34763e-128	0.93416	0.872	0.26	6.93762e-124
PRR13	5.9305e-128	0.931446	0.642	0.143	1.22904e-123
ANGPT1	6.25144e-128	0.97739	0.323	0.011	1.29555e-123
MRPS35	6.26058e-128	0.92055	0.36	0.022	1.29744e-123
MRPL3	8.08311e-128	0.916397	0.335	0.016	1.67514e-123
MRPL51	1.21525e-127	0.984755	0.412	0.043	2.51849e-123
VDAC3	1.37439e-127	0.910932	0.453	0.056	2.84828e-123
SNHG25	1.96808e-127	-1.98037	0.479	0.722	4.07865e-123
AURKAIP1	2.35809e-127	0.974045	0.508	0.084	4.88691e-123
BAG1	4.09496e-127	0.880894	0.633	0.138	8.4864e-123
MRPS15	6.65461e-127	0.933518	0.483	0.072	1.3791e-122
HSD17B10	1.37115e-126	1.03696	0.396	0.039	2.84156e-122
FIBP	1.84272e-126	0.975568	0.469	0.066	3.81886e-122
SSNA1	2.41492e-126	0.970828	0.429	0.049	5.00467e-122
CCT2	2.7951e-126	0.831023	0.718	0.175	5.79257e-122
PPP1CB	2.8048e-126	0.86419	0.811	0.223	5.81266e-122
ECH1	2.85112e-126	0.962728	0.512	0.087	5.90866e-122
PKN1	3.59143e-126	0.820583	0.644	0.139	7.44287e-122
KRT10	6.35074e-126	0.986273	0.488	0.077	1.31613e-121
CWC15	1.17917e-125	0.869911	0.493	0.076	2.44371e-121
SMARCB1	1.48097e-125	0.945438	0.407	0.041	3.06917e-121
RPL29	1.61084e-125	0.866731	1	0.56	3.33831e-121
HSP90AA1	1.87409e-125	-0.835484	0.996	0.883	3.88387e-121
TMEM50A	1.91628e-125	0.887	0.519	0.089	3.97131e-121
LYST	2.3381e-125	-2.1841	0.349	0.684	4.84547e-121
IGFBP7	3.95115e-125	0.988048	0.538	0.101	8.18837e-121
FAH	4.05529e-125	0.900732	0.363	0.025	8.40418e-121
TWF2	4.55702e-125	0.958675	0.433	0.053	9.44396e-121
SEC61G	1.38693e-124	0.882247	0.669	0.155	2.87428e-120
C12orf75	1.95218e-124	1.0255	0.357	0.026	4.0457e-120
TM7SF3	1.97557e-124	0.857511	0.478	0.066	4.09418e-120
RAB4A	2.43547e-124	0.941648	0.398	0.04	5.04728e-120
NSMCE1	2.62895e-124	0.955199	0.432	0.054	5.44824e-120
C1D	4.3738e-124	0.884148	0.461	0.063	9.06426e-120
TMEM18	5.25363e-124	0.956294	0.389	0.036	1.08876e-119
LMAN2	6.05484e-124	0.9125	0.528	0.093	1.25481e-119
RPN2	8.08658e-124	0.909328	0.593	0.123	1.67586e-119
PNKD	1.05068e-123	0.924145	0.427	0.052	2.17744e-119
TMED9	1.88578e-123	0.933733	0.483	0.075	3.9081e-119
MGST2	2.06252e-123	1.02397	0.41	0.049	4.27436e-119
YES1	2.7781e-123	0.927024	0.322	0.013	5.75733e-119
SNHG32	3.01992e-123	0.86963	0.843	0.238	6.25849e-119
MSRB3	3.06139e-123	0.893124	0.484	0.073	6.34443e-119
NDUFAB1	5.01447e-123	0.996714	0.386	0.038	1.0392e-118
COPS3	6.2673e-123	0.863707	0.527	0.09	1.29884e-118
MDH1	7.25088e-123	0.944951	0.37	0.031	1.50267e-118
ZFAS1	8.89678e-123	0.98073	0.998	0.441	1.84377e-118
MRPL47	9.91473e-123	0.960491	0.406	0.045	2.05473e-118
TXNL1	1.04619e-122	0.798523	0.644	0.144	2.16812e-118
C11orf74	1.5875e-122	0.967909	0.331	0.018	3.28994e-118
HLA-B	2.02294e-122	-0.765091	0.97	0.864	4.19233e-118
EMC6	3.09472e-122	0.914526	0.401	0.041	6.41351e-118
SS18L2	5.6978e-122	0.93376	0.475	0.071	1.18081e-117
ADA	9.18071e-122	0.845315	0.395	0.037	1.90261e-117
UBE2G1	1.21372e-121	0.957343	0.406	0.045	2.51531e-117
YWHAG	1.93118e-121	0.822494	0.476	0.07	4.00218e-117
LMNA	2.15797e-121	-1.8558	0.527	0.738	4.47218e-117
LRRC59	2.67622e-121	0.90589	0.404	0.043	5.5462e-117
TIMM9	2.82922e-121	0.960986	0.326	0.017	5.86327e-117
CLK1	4.56492e-121	-1.39158	0.771	0.787	9.46035e-117
CFAP36	6.10397e-121	0.905574	0.322	0.014	1.26499e-116
METTL26	7.89713e-121	0.841907	0.663	0.152	1.6366e-116
SRP9	9.79259e-121	0.891613	0.467	0.069	2.02942e-116
NUDT5	1.0009e-120	0.930541	0.364	0.031	2.07427e-116
DYNLT1	1.59424e-120	0.914461	0.339	0.02	3.3039e-116
SUCLG1	2.66411e-120	0.851772	0.466	0.066	5.5211e-116
EPS15	3.26583e-120	0.806117	0.516	0.085	6.76811e-116
MRPS27	4.24227e-120	0.919314	0.385	0.038	8.79168e-116
MOB4	4.70584e-120	0.813205	0.455	0.063	9.75238e-116
PMF1	5.87471e-120	0.892392	0.403	0.045	1.21748e-115
QPRT	5.95778e-120	0.901672	0.303	0.009	1.23469e-115
HOXB2	6.59862e-120	0.846825	0.49	0.077	1.3675e-115
POLR2J	9.15956e-120	0.905581	0.489	0.081	1.89823e-115
CNOT7	9.75739e-120	0.943756	0.39	0.041	2.02212e-115
PSMA4	1.03083e-119	0.777212	0.62	0.136	2.1363e-115
CCNI	1.32471e-119	0.968826	0.972	0.353	2.74532e-115
ATP5ME	1.69817e-119	0.860463	0.806	0.212	3.51928e-115
CMPK1	1.93538e-119	0.910129	0.472	0.073	4.01089e-115
FHL3	2.55671e-119	0.94915	0.32	0.016	5.29852e-115
CTNNB1	2.95454e-119	-1.34889	0.829	0.789	6.12299e-115
GNAI3	3.07406e-119	0.918902	0.505	0.087	6.37069e-115
PDIA6	4.84479e-119	0.858275	0.617	0.142	1.00404e-114
TXNDC12	5.67907e-119	0.937816	0.345	0.025	1.17693e-114
SEC61B	6.03574e-119	0.860487	0.863	0.259	1.25085e-114
RCN2	8.17264e-119	0.837224	0.449	0.061	1.6937e-114
RPS29	9.14306e-119	0.857557	1	0.45	1.89481e-114
TBCB	9.46115e-119	0.881898	0.444	0.064	1.96073e-114
STMN1	1.52551e-118	1.00694	0.34	0.023	3.16146e-114
PPT1	3.64812e-118	0.951981	0.409	0.05	7.56036e-114
TRAPPC2L	4.37911e-118	0.926675	0.412	0.051	9.07528e-114
OCIAD1	7.41633e-118	0.842154	0.571	0.12	1.53696e-113
MRPL21	8.8535e-118	0.889297	0.373	0.035	1.8348e-113
TRG-AS1	1.60136e-117	0.871419	0.34	0.021	3.31866e-113
MRPL52	2.45632e-117	0.957062	0.464	0.075	5.09047e-113
CD302	3.8678e-117	0.926498	0.49	0.086	8.01564e-113
BRI3	4.59192e-117	0.824887	0.715	0.191	9.5163e-113
NTNG2	5.02483e-117	0.868959	0.31	0.013	1.04134e-112
SNRPA	5.4437e-117	0.904613	0.481	0.08	1.12815e-112
NDUFA12	6.52791e-117	0.873704	0.42	0.054	1.35284e-112
CNST	7.76053e-117	0.815742	0.516	0.091	1.60829e-112
C20orf27	4.84977e-116	0.940803	0.355	0.031	1.00507e-111
C9orf78	5.07275e-116	0.838617	0.55	0.109	1.05128e-111
HEBP2	5.52785e-116	0.848743	0.527	0.101	1.14559e-111
PLEKHJ1	8.88841e-116	0.922563	0.386	0.043	1.84203e-111
SNRPG	9.11653e-116	0.917862	0.528	0.103	1.88931e-111
TMEM141	1.16788e-115	0.899173	0.339	0.026	2.42032e-111
NDFIP1	1.65494e-115	0.834831	0.482	0.077	3.42969e-111
ARF4	2.86615e-115	0.899681	0.466	0.076	5.9398e-111
CKS2	3.0554e-115	0.868662	0.567	0.116	6.33201e-111
YRDC	3.08539e-115	0.886818	0.363	0.033	6.39416e-111
STK17A	3.69443e-115	0.927792	0.305	0.013	7.65634e-111
EEF1E1	4.68266e-115	0.903667	0.374	0.038	9.70434e-111
COX7B	6.4215e-115	0.867889	0.806	0.232	1.33079e-110
COX14	9.17757e-115	0.944025	0.421	0.06	1.90196e-110
CPSF6	1.0467e-114	0.684868	0.676	0.162	2.16918e-110
MMADHC	1.83532e-114	0.810311	0.437	0.061	3.80352e-110
CRNDE	2.49763e-114	0.929712	0.354	0.029	5.17609e-110
ERCC1	5.99586e-114	0.896941	0.455	0.072	1.24258e-109
GABARAPL2	7.43321e-114	0.838078	0.577	0.125	1.54046e-109
RHOH	9.13551e-114	0.937268	0.288	0.009	1.89324e-109
ARF5	1.41685e-113	0.931527	0.484	0.088	2.93628e-109
ERGIC1	1.44286e-113	0.875936	0.377	0.04	2.99019e-109
PGK1	1.63702e-113	0.776777	0.765	0.217	3.39257e-109
ADSL	1.74797e-113	0.810928	0.368	0.035	3.6225e-109
TUBA1C	2.53877e-113	0.729091	0.616	0.138	5.26134e-109
CAMTA1	2.90086e-113	0.90172	0.444	0.071	6.01174e-109
MRPL42	4.24747e-113	0.81824	0.408	0.05	8.80245e-109
IDS	4.48978e-113	0.838212	0.751	0.208	9.30461e-109
LYSMD2	4.60869e-113	0.86242	0.372	0.038	9.55104e-109
STAT5A	8.02736e-113	0.789379	0.426	0.056	1.66359e-108
MPST	1.27433e-112	0.931189	0.482	0.087	2.64092e-108
CDC123	1.6545e-112	0.825413	0.389	0.043	3.42878e-108
MFF	1.9173e-112	0.797235	0.406	0.05	3.97342e-108
RAB5IF	3.1331e-112	0.710379	0.857	0.254	6.49303e-108
RNF125	3.27063e-112	0.867619	0.32	0.019	6.77806e-108
LYRM4	3.60084e-112	0.879461	0.358	0.035	7.46239e-108
ZNRF1	5.92268e-112	0.827092	0.324	0.021	1.22742e-107
GHITM	6.39245e-112	0.806794	0.536	0.106	1.32477e-107
CD99	7.01246e-112	0.795745	0.684	0.177	1.45326e-107
EIF5A	1.98751e-111	0.919978	0.953	0.339	4.11892e-107
RNF114	2.00972e-111	0.691727	0.621	0.141	4.16494e-107
TCEAL8	2.50434e-111	0.860345	0.323	0.023	5.18999e-107
ZBTB7A	2.57984e-111	-1.81841	0.513	0.715	5.34647e-107
ANXA7	4.63204e-111	0.662113	0.591	0.128	9.59943e-107
BCLAF1	7.87858e-111	-1.1443	0.88	0.801	1.63276e-106
BANF1	1.07165e-110	0.955567	0.418	0.062	2.22089e-106
COX16	1.34031e-110	0.905607	0.366	0.04	2.77766e-106
FTH1	1.6896e-110	-0.593991	1	0.905	3.50153e-106
CHMP2A	3.28412e-110	0.775382	0.611	0.149	6.80602e-106
POLR2C	4.34861e-110	0.809044	0.328	0.024	9.01206e-106
RNF130	6.61719e-110	0.847885	0.561	0.123	1.37135e-105
SIK3	1.20889e-109	0.769474	0.525	0.1	2.50531e-105
UROS	1.97506e-109	0.842723	0.361	0.037	4.09311e-105
PAIP1	3.07419e-109	0.760768	0.383	0.043	6.37095e-105
MTRF1L	6.36341e-109	0.759624	0.492	0.089	1.31875e-104
GUK1	7.32394e-109	0.648334	0.801	0.235	1.51781e-104
MAF1	1.38693e-108	0.803895	0.476	0.086	2.87426e-104
C1orf43	1.46632e-108	0.889485	0.351	0.035	3.0388e-104
PSMD8	1.82357e-108	0.745674	0.671	0.175	3.77917e-104
MATN4	2.02555e-108	0.824744	0.243	0	4.19776e-104
CLTB	3.63621e-108	0.849867	0.418	0.062	7.53568e-104
Z93241.1	4.05902e-108	-2.68562	0.031	0.465	8.41192e-104
ARL5A	4.53887e-108	0.855339	0.374	0.043	9.40636e-104
ATP5IF1	5.13785e-108	0.75742	0.714	0.192	1.06477e-103
ELOB	5.46147e-108	0.838149	0.883	0.283	1.13183e-103
CHCHD10	6.61735e-108	0.921323	0.426	0.066	1.37138e-103
TLE4	9.58465e-108	-1.75084	0.571	0.723	1.98632e-103
SSB	1.25591e-107	0.68489	0.712	0.188	2.60275e-103
PDAP1	1.91197e-107	0.854124	0.362	0.04	3.96237e-103
LAMTOR5	1.98252e-107	0.735235	0.615	0.15	4.10857e-103
AKR1C3	2.79365e-107	0.829711	0.241	0	5.78955e-103
FAM136A	4.09165e-107	0.778691	0.435	0.067	8.47954e-103
ETFB	5.08561e-107	0.792401	0.522	0.109	1.05394e-102
MAPK1IP1L	5.81125e-107	0.755256	0.605	0.144	1.20432e-102
NIFK	5.88655e-107	0.803029	0.393	0.049	1.21993e-102
PSMF1	7.60312e-107	0.820924	0.334	0.031	1.57567e-102
ATP5MPL	1.05681e-106	0.817859	0.765	0.211	2.19014e-102
CSTA	1.09815e-106	0.92047	0.709	0.191	2.27581e-102
ORAI1	1.29597e-106	0.740636	0.401	0.051	2.68577e-102
RAB2A	1.30165e-106	0.815775	0.529	0.113	2.69754e-102
SSU72	1.39348e-106	0.753549	0.582	0.135	2.88785e-102
PSMB8	2.48335e-106	0.810956	0.437	0.069	5.14648e-102
NXT1	3.57445e-106	0.871879	0.467	0.085	7.40769e-102
NDUFB7	3.70471e-106	0.752722	0.632	0.161	7.67765e-102
PIN1	4.70698e-106	0.820066	0.402	0.056	9.75474e-102
MARCKSL1	4.97269e-106	0.866668	0.513	0.105	1.03054e-101
ODC1	5.11929e-106	0.810867	0.374	0.042	1.06092e-101
PLGRKT	5.28746e-106	0.845501	0.266	0.008	1.09577e-101
EIF4EBP1	5.41644e-106	0.917105	0.383	0.05	1.1225e-101
CHCHD5	6.43039e-106	0.901615	0.423	0.068	1.33263e-101
KDELR2	6.53112e-106	0.790827	0.374	0.044	1.35351e-101
CPNE1	7.21427e-106	0.814786	0.507	0.105	1.49509e-101
PIGP	1.08626e-105	0.792244	0.282	0.013	2.25116e-101
HPRT1	1.611e-105	0.812383	0.423	0.065	3.33864e-101
TRIAP1	1.82193e-105	0.824402	0.354	0.038	3.77576e-101
DUSP23	1.99831e-105	0.887303	0.352	0.039	4.14129e-101
ELOC	3.26951e-105	0.751479	0.575	0.132	6.77573e-101
COPS6	3.34119e-105	0.696827	0.533	0.11	6.92428e-101
RALY	3.87673e-105	0.736745	0.58	0.137	8.03413e-101
EMC3	4.46157e-105	0.72896	0.454	0.076	9.24616e-101
SPNS2	5.25325e-105	0.822371	0.236	0	1.08868e-100
RNF181	5.45451e-105	0.928776	0.441	0.077	1.13039e-100
ZNF44	5.70641e-105	0.774102	0.4	0.054	1.1826e-100
TIMM10	7.96126e-105	0.914644	0.358	0.043	1.64989e-100
TYW3	8.4902e-105	0.854103	0.333	0.031	1.75951e-100
SNF8	1.18445e-104	0.788898	0.45	0.077	2.45465e-100
TMCO3	2.27145e-104	0.69575	0.511	0.099	4.70735e-100
PAPOLA	2.44647e-104	0.701721	0.748	0.216	5.07007e-100
HLA-DPB1	2.77239e-104	0.847767	0.637	0.164	5.7455e-100
VMP1	2.84635e-104	-1.43753	0.737	0.759	5.89878e-100
PMPCB	3.12407e-104	0.707562	0.471	0.082	6.47431e-100
FUNDC2	3.45773e-104	0.842767	0.349	0.037	7.16579e-100
HMGN2	3.92321e-104	0.728977	0.771	0.228	8.13047e-100
CMTM3	4.07785e-104	0.792305	0.383	0.05	8.45094e-100
PSMA3	4.46573e-104	0.727125	0.563	0.128	9.25477e-100
PPIA	4.86919e-104	0.947852	0.949	0.325	1.00909e-99
EMC7	7.29065e-104	0.77164	0.328	0.028	1.51091e-99
TMEM238	8.52498e-104	0.869039	0.324	0.029	1.76672e-99
RPL18A	1.34628e-103	-0.49141	1	0.918	2.79004e-99
RNASEH2C	1.3687e-103	0.799616	0.585	0.139	2.83649e-99
AKR1A1	1.44074e-103	0.749402	0.518	0.107	2.98579e-99
TAF12	1.64162e-103	0.804391	0.306	0.023	3.40209e-99
PSMB4	2.18416e-103	0.749742	0.544	0.121	4.52644e-99
NDUFA1	5.88993e-103	0.743537	0.701	0.194	1.22063e-98
JUP	5.98023e-103	0.761759	0.288	0.015	1.23934e-98
PHPT1	6.56164e-103	0.751594	0.701	0.201	1.35983e-98
NUDC	1.42087e-102	0.68682	0.501	0.1	2.94462e-98
PPP1R7	2.08244e-102	0.850587	0.35	0.04	4.31565e-98
KCMF1	3.41731e-102	0.732011	0.414	0.063	7.08203e-98
YIF1A	3.90419e-102	0.773504	0.317	0.027	8.09105e-98
HADHB	3.93537e-102	0.758416	0.448	0.078	8.15567e-98
SON	4.00503e-102	-1.26257	0.867	0.791	8.30003e-98
HDDC2	4.25971e-102	0.782444	0.337	0.035	8.82782e-98
SFPQ	4.77479e-102	-0.858557	0.956	0.825	9.89527e-98
ABHD14A	7.94353e-102	0.817242	0.287	0.018	1.64622e-97
WDR83OS	1.0189e-101	0.718517	0.76	0.226	2.11157e-97
LMAN1	1.20351e-101	0.797089	0.375	0.048	2.49416e-97
VKORC1	1.50046e-101	0.897185	0.344	0.039	3.10956e-97
PSMD9	2.25715e-101	0.811789	0.402	0.061	4.67771e-97
LSM12	2.38966e-101	0.833422	0.412	0.066	4.95234e-97
FAM204A	3.60988e-101	0.722724	0.501	0.101	7.48111e-97
GMDS	4.30354e-101	0.820784	0.291	0.019	8.91865e-97
GLO1	4.5107e-101	0.855012	0.316	0.029	9.34797e-97
STUB1	4.81219e-101	0.692722	0.522	0.111	9.97279e-97
CIB1	5.73892e-101	0.665219	0.581	0.136	1.18933e-96
NMI	9.64823e-101	0.792065	0.298	0.021	1.9995e-96
MRPL22	1.03347e-100	0.749738	0.363	0.045	2.14177e-96
SUPT4H1	1.16284e-100	0.743216	0.389	0.055	2.40986e-96
NCBP2AS2	1.61386e-100	0.759119	0.375	0.049	3.34456e-96
DPH5	4.30809e-100	0.826106	0.268	0.012	8.92808e-96
FSCN1	5.65351e-100	0.625876	0.523	0.107	1.17163e-95
LINC01578	7.14162e-100	-0.885535	0.942	0.79	1.48003e-95
RPS8	1.26941e-99	0.704245	0.999	0.621	2.63073e-95
C4orf3	1.31134e-99	0.900231	0.377	0.056	2.71762e-95
LAMTOR2	1.45981e-99	0.896149	0.413	0.07	3.02531e-95
F11R	1.87509e-99	0.792304	0.268	0.012	3.88594e-95
MTDH	1.87695e-99	0.664997	0.812	0.254	3.88978e-95
EIF2A	2.00025e-99	0.621079	0.585	0.139	4.14531e-95
ARPC1A	2.06674e-99	0.728775	0.321	0.029	4.28311e-95
DENR	2.1345e-99	0.821463	0.418	0.07	4.42354e-95
RNASEH2B	2.16867e-99	0.574395	0.562	0.128	4.49435e-95
CST3	2.23389e-99	-1.3748	0.782	0.739	4.62952e-95
GLTP	2.36864e-99	0.816328	0.35	0.04	4.90878e-95
KRT18	2.38256e-99	0.83796	0.224	0	4.93762e-95
NDUFS6	2.44127e-99	0.696575	0.617	0.162	5.05928e-95
SMIM20	2.72689e-99	0.767157	0.283	0.018	5.65121e-95
MYCBP2	2.74791e-99	-1.90524	0.492	0.692	5.69476e-95
SCAND1	3.17411e-99	0.695182	0.794	0.244	6.57802e-95
TMEM126A	3.4906e-99	0.832158	0.321	0.032	7.23392e-95
SMIM3	4.06637e-99	0.679638	0.581	0.14	8.42714e-95
GPSM1	5.08194e-99	0.756832	0.277	0.014	1.05318e-94
KLF3	8.22949e-99	0.760342	0.28	0.016	1.70548e-94
TRAPPC1	1.57132e-98	0.869821	0.455	0.09	3.2564e-94
MZT1	1.61001e-98	0.802946	0.304	0.025	3.33659e-94
NDUFS3	1.62901e-98	0.695584	0.454	0.084	3.37595e-94
GALNT1	1.96556e-98	0.78717	0.326	0.032	4.07342e-94
CXCR4	2.02009e-98	-2.12213	0.251	0.592	4.18642e-94
AZU1	2.40721e-98	-1.0238	0.838	0.826	4.98871e-94
ACBD6	2.77923e-98	0.730716	0.341	0.038	5.75968e-94
MAPKAPK3	3.82749e-98	0.669611	0.478	0.093	7.93209e-94
TRGC1	3.83473e-98	0.777601	0.375	0.052	7.9471e-94
ECI1	4.13278e-98	0.818056	0.329	0.035	8.56477e-94
GNAS	6.49478e-98	-0.76809	0.961	0.821	1.34598e-93
ZNF511	6.7833e-98	0.72497	0.423	0.071	1.40577e-93
MAP2K2	8.49134e-98	0.596549	0.654	0.176	1.75975e-93
HSPB11	8.94768e-98	0.812176	0.326	0.034	1.85432e-93
ABT1	9.19363e-98	0.72233	0.328	0.033	1.90529e-93
TWISTNB	1.25921e-97	0.661213	0.61	0.152	2.60959e-93
AK5	1.29238e-97	0.795107	0.277	0.017	2.67833e-93
PSMB2	1.64916e-97	0.790647	0.41	0.07	3.41771e-93
MFNG	1.90325e-97	0.812531	0.354	0.046	3.9443e-93
SPNS3	2.03587e-97	0.591222	0.588	0.138	4.21913e-93
MYADM	2.05855e-97	-1.10096	0.883	0.774	4.26613e-93
NIPSNAP2	2.09656e-97	0.750298	0.379	0.053	4.34491e-93
NDUFA10	2.3239e-97	0.576163	0.59	0.14	4.81605e-93
RALBP1	2.75598e-97	0.767657	0.408	0.066	5.71149e-93
UCHL3	2.90072e-97	0.758185	0.309	0.027	6.01146e-93
CPXM1	3.09875e-97	0.7368	0.288	0.019	6.42185e-93
PDE4B	3.2599e-97	0.791241	0.295	0.021	6.75582e-93
PCNP	3.59961e-97	0.75488	0.471	0.094	7.45982e-93
MPO	4.2476e-97	1.08718	0.219	0	8.80272e-93
TFPI	4.2476e-97	0.781862	0.219	0	8.80272e-93
PPP1CC	4.94826e-97	0.728052	0.465	0.091	1.02548e-92
DHPS	5.35326e-97	0.750186	0.324	0.033	1.10941e-92
DCTPP1	6.01329e-97	0.779381	0.269	0.016	1.24619e-92
LRPAP1	8.59192e-97	0.693474	0.54	0.128	1.78059e-92
GNG10	1.01125e-96	0.762291	0.297	0.024	2.09571e-92
SERBP1	1.09061e-96	0.649856	0.772	0.239	2.26019e-92
HOPX	1.15294e-96	0.893168	0.22	0.001	2.38934e-92
CCT5	1.88019e-96	0.771956	0.36	0.047	3.89652e-92
AL592183.1	2.07023e-96	0.853463	0.309	0.029	4.29034e-92
SRP19	2.70278e-96	0.728438	0.373	0.052	5.60125e-92
PDLIM1	3.68446e-96	0.679388	0.438	0.077	7.63568e-92
LYRM1	4.1846e-96	0.706359	0.356	0.043	8.67216e-92
PSMB5	4.47714e-96	0.791584	0.277	0.018	9.27842e-92
C17orf49	5.26703e-96	0.691159	0.529	0.121	1.09154e-91
SH2D1A	5.63937e-96	0.775013	0.217	0	1.1687e-91
MRPL43	5.77225e-96	0.767597	0.27	0.015	1.19624e-91
UBB	6.15124e-96	0.853949	0.97	0.35	1.27478e-91
AC093673.1	6.7975e-96	0.798003	0.374	0.056	1.40871e-91
NDUFA6	6.86849e-96	0.7667	0.362	0.05	1.42343e-91
SDSL	7.17213e-96	0.762044	0.295	0.024	1.48635e-91
MARCH5	7.72296e-96	0.758332	0.36	0.048	1.60051e-91
KPNA2	1.03778e-95	0.652164	0.613	0.157	2.15069e-91
RHOA	1.05666e-95	0.729177	0.856	0.293	2.18981e-91
DNAJC19	1.11324e-95	0.789383	0.259	0.013	2.30708e-91
SMIM19	1.20377e-95	0.754361	0.304	0.027	2.4947e-91
VBP1	1.45368e-95	0.740076	0.262	0.013	3.01261e-91
SCP2	1.57134e-95	0.813103	0.425	0.078	3.25644e-91
PEF1	1.69278e-95	0.785763	0.299	0.026	3.50811e-91
GNB1	4.36247e-95	0.730081	0.519	0.12	9.04079e-91
CEP57	4.88934e-95	0.738564	0.338	0.04	1.01327e-90
EIF2S2	5.89962e-95	0.774059	0.415	0.075	1.22264e-90
C11orf58	6.13731e-95	0.570471	0.627	0.164	1.2719e-90
NOA1	7.32423e-95	0.786105	0.268	0.016	1.51787e-90
CD52	9.12856e-95	0.827621	0.458	0.09	1.8918e-90
SARNP	1.2143e-94	0.685189	0.527	0.12	2.51651e-90
NELFE	1.9564e-94	0.759213	0.367	0.053	4.05444e-90
NUDT21	2.67211e-94	0.764972	0.338	0.041	5.53768e-90
COX11	4.06559e-94	0.729816	0.265	0.016	8.42553e-90
NT5M	4.08715e-94	0.715799	0.264	0.014	8.47021e-90
MCTP2	4.28674e-94	0.715901	0.375	0.053	8.88385e-90
ATIC	4.98897e-94	0.739472	0.3	0.027	1.03391e-89
SELENOW	5.25973e-94	0.778915	0.324	0.037	1.09003e-89
GNAQ	5.45199e-94	0.665504	0.547	0.13	1.12987e-89
NUTF2	5.47254e-94	0.711034	0.513	0.118	1.13413e-89
IFT57	5.60443e-94	0.734348	0.316	0.032	1.16146e-89
MRPL9	6.21347e-94	0.742063	0.37	0.054	1.28768e-89
CTSA	6.3293e-94	0.627397	0.62	0.162	1.31168e-89
PSMG4	6.39779e-94	0.710059	0.265	0.015	1.32588e-89
LUZP1	6.51018e-94	0.522701	0.573	0.131	1.34917e-89
SNX2	6.65864e-94	0.658152	0.472	0.095	1.37994e-89
ST3GAL4	7.89887e-94	0.742909	0.346	0.043	1.63696e-89
HSP90B1	8.04469e-94	-1.06466	0.941	0.816	1.66718e-89
MACROD1	8.20164e-94	0.737279	0.278	0.019	1.69971e-89
SLC39A8	1.28456e-93	0.782747	0.259	0.013	2.66211e-89
ZNF22	1.50263e-93	0.723842	0.311	0.031	3.11406e-89
ADRM1	1.73547e-93	0.617897	0.494	0.105	3.59658e-89
ZNHIT3	1.81056e-93	0.742604	0.259	0.014	3.7522e-89
IER3IP1	2.39778e-93	0.769964	0.339	0.044	4.96915e-89
IFI16	2.59754e-93	0.736402	0.311	0.031	5.38315e-89
AP3S1	3.69447e-93	0.735933	0.36	0.05	7.65642e-89
TMX2	4.30668e-93	0.739052	0.285	0.022	8.92517e-89
UBE2D2	5.86485e-93	0.613554	0.558	0.137	1.21543e-88
CHMP2B	6.07094e-93	0.747404	0.331	0.04	1.25814e-88
ERP44	7.13468e-93	0.760999	0.352	0.049	1.47859e-88
CDS2	7.84104e-93	0.704183	0.398	0.064	1.62498e-88
TOMM40	1.06304e-92	0.678134	0.375	0.056	2.20304e-88
DGUOK	1.2959e-92	0.776951	0.355	0.052	2.68562e-88
TPST2	1.38298e-92	0.76606	0.277	0.02	2.86609e-88
EIF4G2	1.5957e-92	-1.21133	0.849	0.767	3.30693e-88
TAF1D	1.71566e-92	0.612032	0.818	0.263	3.55554e-88
PPDPF	1.94031e-92	0.702213	0.816	0.27	4.0211e-88
XRN2	1.95502e-92	0.577322	0.584	0.149	4.05159e-88
ABCE1	2.9468e-92	0.754033	0.346	0.046	6.10695e-88
GLRX3	3.02053e-92	0.717591	0.347	0.046	6.25974e-88
CCNC	3.03848e-92	0.670803	0.37	0.054	6.29694e-88
GPCPD1	4.41933e-92	-2.07492	0.298	0.6	9.15863e-88
CDIP1	4.66834e-92	0.69305	0.208	0	9.67467e-88
HDAC1	4.90357e-92	0.725566	0.327	0.039	1.01622e-87
NDUFC1	5.05089e-92	0.6813	0.415	0.074	1.04675e-87
SMARCC1	5.49409e-92	0.683977	0.472	0.098	1.13859e-87
GAS6-AS1	9.23026e-92	0.643047	0.398	0.064	1.91288e-87
DANCR	1.14593e-91	0.757775	0.292	0.026	2.37483e-87
NDUFA2	1.44053e-91	0.704442	0.547	0.14	2.98535e-87
METTL5	2.43155e-91	0.733344	0.269	0.018	5.03914e-87
CENPV	3.13609e-91	0.764339	0.249	0.012	6.49924e-87
MRPL37	3.20009e-91	0.749444	0.334	0.042	6.63186e-87
HSH2D	3.62598e-91	-1.36405	0.791	0.767	7.51447e-87
C18orf32	4.47683e-91	0.745153	0.357	0.051	9.27778e-87
CNPY2	5.02153e-91	0.65958	0.441	0.086	1.04066e-86
CALM3	6.5372e-91	0.69754	0.564	0.148	1.35477e-86
TMEM179B	8.14128e-91	0.841168	0.299	0.032	1.6872e-86
HINT2	8.97864e-91	0.793805	0.287	0.026	1.86073e-86
ANAPC15	1.06908e-90	0.804468	0.327	0.042	2.21555e-86
STX8	1.12812e-90	0.792016	0.305	0.033	2.33792e-86
CERS6	1.17445e-90	0.731023	0.385	0.062	2.43393e-86
DHRS4L2	1.36712e-90	0.760145	0.282	0.024	2.83322e-86
ZNF581	1.76646e-90	0.748089	0.327	0.039	3.66082e-86
SLC27A5	2.19871e-90	0.68896	0.205	0	4.55662e-86
MRPL57	2.70208e-90	0.581202	0.649	0.182	5.59979e-86
N4BP2L1	4.07094e-90	0.643257	0.459	0.093	8.43661e-86
RPL37A	4.41827e-90	0.772552	1	0.475	9.15643e-86
CSTB	5.76008e-90	0.679545	0.521	0.127	1.19372e-85
IGHM	7.92549e-90	0.820803	0.203	0	1.64248e-85
ANPEP	7.92549e-90	0.739966	0.203	0	1.64248e-85
MRPS12	8.19395e-90	0.75134	0.293	0.028	1.69811e-85
PRKRA	8.24692e-90	0.663301	0.363	0.053	1.70909e-85
TNFRSF14	8.25504e-90	0.720059	0.254	0.014	1.71077e-85
ECSIT	8.39761e-90	0.687081	0.293	0.028	1.74032e-85
BIN2	9.27455e-90	0.702705	0.345	0.046	1.92206e-85
ZNF433-AS1	1.05214e-89	0.59361	0.515	0.12	2.18046e-85
EAPP	1.17886e-89	0.678702	0.455	0.094	2.44308e-85
RAB8A	1.20626e-89	0.629641	0.423	0.078	2.49985e-85
NUCKS1	1.43774e-89	0.679414	0.531	0.133	2.97958e-85
LPCAT2	2.74222e-89	0.748974	0.326	0.041	5.68297e-85
FKBP4	2.78109e-89	0.687034	0.272	0.02	5.76352e-85
BLOC1S1	3.46121e-89	0.651661	0.556	0.143	7.17302e-85
STT3B	4.79882e-89	0.546168	0.58	0.149	9.94507e-85
PPIG	4.81618e-89	0.576496	0.562	0.14	9.98105e-85
GTSF1	4.87248e-89	0.762936	0.249	0.014	1.00977e-84
FDX1	5.1292e-89	0.745438	0.39	0.067	1.06297e-84
NAXE	5.39447e-89	0.80512	0.343	0.05	1.11795e-84
ZNRD1	6.5194e-89	0.671589	0.361	0.055	1.35108e-84
ENSA	6.56007e-89	0.63659	0.602	0.167	1.35951e-84
FGFR1OP2	6.76056e-89	0.695154	0.368	0.057	1.40106e-84
NDUFAF3	1.0009e-88	0.805614	0.381	0.067	2.07426e-84
NASP	1.16829e-88	0.639039	0.561	0.142	2.42117e-84
FABP5	1.87257e-88	0.742029	0.311	0.036	3.88072e-84
ITPA	1.99143e-88	0.730525	0.37	0.061	4.12704e-84
CHP1	2.06923e-88	0.784856	0.448	0.098	4.28827e-84
CDC42SE2	2.07473e-88	0.563224	0.558	0.14	4.29967e-84
CFAP298	2.22986e-88	0.689727	0.258	0.017	4.62117e-84
MIR222HG	2.71751e-88	-1.83937	0.424	0.643	5.63178e-84
RGS19	3.24352e-88	0.811867	0.322	0.043	6.72186e-84
CDCA7L	3.69121e-88	0.686326	0.2	0	7.64967e-84
PSMG1	3.9081e-88	0.650302	0.249	0.014	8.09914e-84
EIF1B	4.45172e-88	0.698689	0.872	0.315	9.22575e-84
TAF10	4.52066e-88	0.564471	0.632	0.18	9.36861e-84
PRDX4	4.97572e-88	0.721489	0.219	0.005	1.03117e-83
COX4I1	5.96669e-88	0.915138	0.982	0.375	1.23654e-83
CEP170	6.29572e-88	0.603611	0.488	0.107	1.30472e-83
GATA2	7.43254e-88	0.779873	0.206	0.002	1.54032e-83
KRR1	9.24187e-88	0.564752	0.627	0.175	1.91529e-83
RPS27	9.56838e-88	0.618389	1	0.594	1.98295e-83
BTG3	1.17753e-87	0.750719	0.387	0.066	2.4403e-83
SAP18	1.18266e-87	0.778939	0.927	0.342	2.45094e-83
NIP7	1.90395e-87	0.644279	0.308	0.033	3.94574e-83
SDHD	3.02602e-87	0.724171	0.292	0.029	6.27112e-83
HOMER3	3.14342e-87	0.60173	0.554	0.14	6.51442e-83
BIN1	4.75603e-87	0.679452	0.197	0	9.85639e-83
NFU1	4.83043e-87	0.719612	0.255	0.017	1.00106e-82
RHEB	4.85354e-87	0.58134	0.561	0.146	1.00585e-82
TEX264	5.04019e-87	0.722578	0.324	0.043	1.04453e-82
ATOX1	6.36025e-87	0.689386	0.467	0.106	1.3181e-82
LSM1	1.0093e-86	0.711963	0.281	0.026	2.09167e-82
DHRS7	1.06699e-86	0.729422	0.349	0.054	2.21122e-82
A1BG	1.35725e-86	0.748995	0.38	0.068	2.81277e-82
IRF1	1.81151e-86	-1.12068	0.84	0.777	3.75418e-82
ZNF331	2.34329e-86	0.729327	0.265	0.02	4.85624e-82
GNAI2	3.29908e-86	0.66855	0.838	0.282	6.83702e-82
IFT20	3.59824e-86	0.644306	0.43	0.087	7.45698e-82
TSSC4	3.93433e-86	0.643738	0.369	0.06	8.15351e-82
NUDCD2	4.14399e-86	0.674754	0.31	0.037	8.58801e-82
AATF	4.52709e-86	0.679327	0.32	0.041	9.38194e-82
SNX17	4.56966e-86	0.633599	0.294	0.03	9.47016e-82
KIAA1143	4.79885e-86	0.652697	0.294	0.031	9.94514e-82
PSMD4	5.5717e-86	0.717888	0.408	0.079	1.15468e-81
GINM1	6.42595e-86	0.694699	0.358	0.056	1.33171e-81
ORMDL1	6.63326e-86	0.563672	0.505	0.119	1.37468e-81
HAX1	6.68174e-86	0.718357	0.276	0.026	1.38472e-81
DEAF1	8.89487e-86	0.620024	0.301	0.033	1.84337e-81
ARL6IP1	9.74431e-86	0.651521	0.755	0.243	2.01941e-81
IFI27L2	9.93358e-86	0.758871	0.465	0.108	2.05863e-81
VPS28	1.43235e-85	0.557259	0.642	0.189	2.9684e-81
MAP7	1.50923e-85	0.693023	0.219	0.006	3.12772e-81
HIKESHI	1.80306e-85	0.71186	0.255	0.019	3.73667e-81
MSRB2	2.24377e-85	0.735844	0.275	0.026	4.64998e-81
CDK4	2.59097e-85	0.711189	0.312	0.039	5.36952e-81
ACADM	2.80088e-85	0.699946	0.254	0.018	5.80455e-81
ELP5	2.86406e-85	0.673731	0.252	0.017	5.93548e-81
BUD23	3.00311e-85	0.6127	0.45	0.095	6.22365e-81
HSBP1	3.26242e-85	0.594815	0.547	0.144	6.76104e-81
PRRC2C	4.52691e-85	-1.29249	0.774	0.754	9.38158e-81
ARMC10	4.59295e-85	0.688266	0.265	0.022	9.51842e-81
METTL9	5.63263e-85	0.656774	0.524	0.134	1.16731e-80
FXR1	6.22701e-85	0.572434	0.7	0.213	1.29049e-80
SERPINB6	6.5662e-85	0.507769	0.563	0.147	1.36078e-80
DEK	7.07894e-85	0.566829	0.586	0.157	1.46704e-80
EBNA1BP2	8.42847e-85	0.717175	0.237	0.013	1.74672e-80
PSMA6	8.53127e-85	0.542306	0.649	0.193	1.76802e-80
NAA10	1.08152e-84	0.550397	0.515	0.127	2.24134e-80
PUM1	1.13478e-84	0.53261	0.657	0.191	2.35171e-80
ATP6AP2	1.5898e-84	0.55108	0.556	0.145	3.29469e-80
KLHL24	2.25646e-84	0.57545	0.495	0.116	4.6763e-80
DMAC1	3.23571e-84	0.736315	0.266	0.024	6.7057e-80
PRXL2C	4.06861e-84	0.625508	0.528	0.137	8.4318e-80
NIBAN1	4.78941e-84	0.680741	0.212	0.005	9.92557e-80
RBMX	5.77224e-84	0.594518	0.81	0.276	1.19624e-79
RNPS1	5.93058e-84	0.537876	0.762	0.245	1.22905e-79
ZNHIT1	5.98012e-84	0.55505	0.584	0.163	1.23932e-79
COA4	8.35334e-84	0.719724	0.278	0.028	1.73115e-79
GTF2A2	8.53721e-84	0.763981	0.312	0.042	1.76925e-79
BTG1	1.04203e-83	-1.04023	0.847	0.742	2.15949e-79
CUL5	1.26203e-83	0.571765	0.427	0.086	2.61544e-79
IDH3B	1.46275e-83	0.67252	0.39	0.073	3.03141e-79
SEC63	1.48973e-83	0.625898	0.472	0.108	3.08732e-79
FKBP3	1.54042e-83	0.690746	0.326	0.046	3.19237e-79
SDHB	1.63197e-83	0.69896	0.345	0.055	3.38209e-79
RBM27	1.76086e-83	0.612835	0.393	0.072	3.6492e-79
DUT	1.88971e-83	0.482745	0.622	0.172	3.91623e-79
POP5	2.33297e-83	0.704471	0.308	0.039	4.83485e-79
EBP	2.8989e-83	0.651452	0.361	0.061	6.00767e-79
SEC11C	5.0601e-83	0.68903	0.269	0.025	1.04865e-78
LAMP1	6.07026e-83	0.640998	0.568	0.161	1.258e-78
CUX1	6.71434e-83	0.57293	0.467	0.104	1.39148e-78
MAFF	6.91466e-83	0.605734	0.53	0.135	1.43299e-78
PSMD13	6.9929e-83	0.647083	0.398	0.077	1.44921e-78
TMCO1	9.12893e-83	0.656475	0.345	0.054	1.89188e-78
MTF2	1.06278e-82	0.620414	0.43	0.09	2.20251e-78
PSMB9	1.14549e-82	0.743482	0.275	0.028	2.37392e-78
MZB1	1.26315e-82	0.712063	0.188	0	2.61775e-78
BZW2	2.00892e-82	0.552303	0.59	0.168	4.16329e-78
SQSTM1	2.16878e-82	-1.17507	0.806	0.748	4.49459e-78
UBE2N	2.37038e-82	0.547201	0.668	0.204	4.91237e-78
ZDHHC24	2.38106e-82	0.635765	0.315	0.042	4.93451e-78
GET3	2.45433e-82	0.644321	0.32	0.043	5.08635e-78
PPIH	2.50906e-82	0.692268	0.295	0.035	5.19977e-78
CHCHD3	2.95931e-82	0.650217	0.309	0.04	6.13286e-78
MRFAP1	4.34274e-82	0.564507	0.524	0.136	8.99989e-78
ICA1	4.49446e-82	0.61887	0.186	0	9.31433e-78
KPNB1	5.73195e-82	0.568925	0.585	0.161	1.18789e-77
CDC26	6.22843e-82	0.714102	0.274	0.028	1.29078e-77
CCNY	7.53645e-82	0.707886	0.295	0.035	1.56185e-77
SLC2A4RG	9.66009e-82	0.630427	0.356	0.059	2.00196e-77
KPNA6	9.67989e-82	0.64135	0.413	0.082	2.00606e-77
REX1BD	9.88177e-82	0.548341	0.699	0.22	2.0479e-77
ITGAX	1.27544e-81	-2.15815	0.126	0.474	2.64322e-77
SYF2	1.34702e-81	0.558365	0.806	0.276	2.79156e-77
CMC2	1.44232e-81	0.667927	0.395	0.077	2.98907e-77
PRPF38A	1.52671e-81	0.613894	0.404	0.08	3.16395e-77
ELMSAN1	1.54233e-81	0.501306	0.657	0.194	3.19633e-77
MRPS2	1.58425e-81	0.539543	0.34	0.05	3.2832e-77
UROD	2.14572e-81	0.65165	0.286	0.032	4.44679e-77
TIMM17A	2.65046e-81	0.570967	0.493	0.12	5.49281e-77
COTL1	2.74537e-81	0.608533	0.667	0.206	5.6895e-77
MRPL41	5.13365e-81	0.604933	0.469	0.112	1.0639e-76
NUDT16L1	5.29883e-81	0.662934	0.303	0.038	1.09813e-76
IP6K2	5.46438e-81	0.494482	0.593	0.162	1.13244e-76
PPM1G	6.11696e-81	0.64068	0.412	0.085	1.26768e-76
ID1	6.34054e-81	0.838351	0.251	0.019	1.31401e-76
HSD17B12	6.53301e-81	0.603872	0.323	0.047	1.3539e-76
COMMD9	7.87217e-81	0.600481	0.34	0.054	1.63143e-76
FAM49B	9.82944e-81	0.539252	0.554	0.151	2.03705e-76
MRPS30	1.04641e-80	0.645111	0.333	0.05	2.16859e-76
LCMT1	1.05525e-80	0.668271	0.235	0.014	2.18689e-76
GAR1	1.10859e-80	0.686859	0.257	0.023	2.29743e-76
LIMD2	1.51465e-80	0.476234	0.724	0.226	3.13895e-76
MRPL40	1.91061e-80	0.665383	0.248	0.02	3.95955e-76
WT1	2.0135e-80	0.645049	0.183	0	4.17278e-76
APH1A	2.37656e-80	0.701784	0.355	0.063	4.92518e-76
EIF2D	2.62827e-80	0.683316	0.291	0.035	5.44683e-76
BFAR	2.73455e-80	0.67092	0.265	0.025	5.66708e-76
SAR1A	3.80088e-80	0.524478	0.59	0.167	7.87694e-76
PIAS2	4.44049e-80	0.671957	0.255	0.021	9.20248e-76
DERL2	5.11657e-80	0.639576	0.318	0.045	1.06036e-75
TBXAS1	5.95805e-80	0.68667	0.281	0.031	1.23475e-75
HNRNPR	7.19701e-80	0.562855	0.53	0.141	1.49151e-75
CMBL	7.90388e-80	0.671071	0.235	0.016	1.638e-75
USE1	1.35218e-79	0.577303	0.389	0.074	2.80225e-75
COPS8	1.83134e-79	0.628001	0.317	0.046	3.79527e-75
SPN	2.02337e-79	0.449861	0.697	0.216	4.19323e-75
TAX1BP1	2.16724e-79	0.519791	0.529	0.137	4.4914e-75
RAB34	2.55414e-79	0.603968	0.389	0.077	5.2932e-75
TSFM	3.26138e-79	0.626939	0.228	0.013	6.75889e-75
TSPYL1	3.37289e-79	0.578895	0.477	0.118	6.98997e-75
ITGAL	3.82923e-79	-2.22754	0.04	0.386	7.93569e-75
SYAP1	4.68906e-79	0.659838	0.396	0.08	9.71762e-75
ZNF92	5.49379e-79	0.645606	0.257	0.023	1.13853e-74
TMEM170A	6.10814e-79	0.638868	0.374	0.071	1.26585e-74
DYNLRB1	6.32631e-79	0.703763	0.347	0.061	1.31106e-74
TPI1	6.74221e-79	0.672054	0.852	0.303	1.39726e-74
ETFA	6.87972e-79	0.635565	0.303	0.041	1.42575e-74
JAGN1	7.51527e-79	0.697193	0.222	0.012	1.55746e-74
TMEM134	8.75334e-79	0.644634	0.248	0.021	1.81404e-74
TIPRL	1.00212e-78	0.617707	0.3	0.039	2.07679e-74
NFIC	1.20716e-78	0.526503	0.447	0.101	2.50171e-74
EIF6	1.40268e-78	0.623553	0.436	0.1	2.90691e-74
AC092338.3	1.55128e-78	0.693527	0.214	0.01	3.21488e-74
CAPZB	1.5573e-78	0.584357	0.517	0.14	3.22735e-74
AKR7A2	1.76667e-78	0.669134	0.363	0.069	3.66124e-74
PRKCSH	2.87778e-78	0.548713	0.587	0.174	5.96392e-74
RETN	3.16286e-78	0.692125	0.178	0	6.55471e-74
SLC25A3	3.23888e-78	0.736597	0.956	0.388	6.71226e-74
PPP1R15A	3.97673e-78	-0.87256	0.925	0.761	8.24137e-74
MED21	5.30656e-78	0.581548	0.397	0.079	1.09973e-73
ZFAND2B	5.71827e-78	0.610267	0.354	0.061	1.18506e-73
RALA	6.29651e-78	0.653473	0.249	0.021	1.30489e-73
SDE2	6.46816e-78	0.536966	0.574	0.162	1.34046e-73
TPT1	6.56316e-78	0.5789	1	0.711	1.36015e-73
SYTL1	8.54557e-78	0.418717	0.701	0.214	1.77098e-73
CD33	8.81855e-78	0.530748	0.414	0.086	1.82756e-73
RGS10	1.04453e-77	0.730652	0.254	0.025	2.16468e-73
ANTKMT	1.36806e-77	0.728183	0.321	0.053	2.83516e-73
TMEM183A	1.51478e-77	0.622058	0.398	0.083	3.13922e-73
BNIP3L	1.70538e-77	0.534458	0.499	0.129	3.53423e-73
EXOSC5	1.78258e-77	0.688619	0.24	0.02	3.69422e-73
COPE	2.48329e-77	0.534873	0.735	0.243	5.14638e-73
NAP1L1	3.22984e-77	0.771658	0.975	0.413	6.69352e-73
DDRGK1	3.54764e-77	0.665261	0.324	0.052	7.35213e-73
CCNDBP1	3.68881e-77	0.625241	0.329	0.053	7.64469e-73
ADGRG3	3.94243e-77	0.63593	0.176	0	8.17029e-73
SND1	4.27443e-77	0.705818	0.333	0.056	8.85833e-73
RASSF1	6.13031e-77	0.457848	0.484	0.117	1.27045e-72
PSMD11	7.21861e-77	0.517452	0.484	0.121	1.49598e-72
AK3	7.74453e-77	0.666911	0.293	0.039	1.60498e-72
AL035446.1	8.78739e-77	0.684181	0.223	0.014	1.8211e-72
THYN1	8.90806e-77	0.630745	0.282	0.035	1.84611e-72
PLAAT4	9.93086e-77	0.700013	0.223	0.014	2.05807e-72
CD47	9.97708e-77	0.530979	0.591	0.172	2.06765e-72
LYPLA1	1.23777e-76	0.581288	0.425	0.095	2.56516e-72
TSN	1.26727e-76	0.602704	0.285	0.035	2.62628e-72
ADH5	1.43858e-76	0.559186	0.316	0.047	2.98132e-72
QDPR	1.47183e-76	0.684863	0.236	0.019	3.05022e-72
RNF126	1.49884e-76	0.522787	0.424	0.094	3.10621e-72
RPL36	1.69435e-76	0.597635	0.998	0.582	3.51137e-72
LITAF	1.78496e-76	0.531014	0.533	0.147	3.69914e-72
NAE1	1.81841e-76	0.62268	0.281	0.034	3.76848e-72
SPAG7	2.00047e-76	0.508621	0.361	0.065	4.14577e-72
AC244502.1	2.063e-76	0.711546	0.178	0.001	4.27537e-72
ASAH1	2.18427e-76	0.457599	0.743	0.241	4.52669e-72
ATP5F1B	2.61029e-76	0.627475	0.872	0.32	5.40957e-72
COPS2	2.88723e-76	0.483592	0.649	0.205	5.98349e-72
CTSS	4.10275e-76	0.638649	0.45	0.113	8.50254e-72
PTS	5.54414e-76	0.606016	0.343	0.061	1.14897e-71
SEPHS2	6.97141e-76	0.61091	0.304	0.043	1.44476e-71
RPP21	9.86967e-76	0.616231	0.22	0.013	2.04539e-71
ATP2B1	1.04575e-75	0.518596	0.585	0.169	2.16721e-71
MIEN1	1.23135e-75	0.645329	0.329	0.056	2.55186e-71
GTF2F2	1.34822e-75	0.650741	0.246	0.023	2.79406e-71
DCTN2	1.37692e-75	0.624647	0.318	0.05	2.85354e-71
S1PR4	1.59496e-75	0.656935	0.243	0.021	3.30539e-71
RPIA	1.64829e-75	0.651611	0.26	0.028	3.41592e-71
C12orf57	1.67308e-75	0.473745	0.691	0.221	3.46729e-71
TESC	1.73171e-75	0.646779	0.373	0.076	3.58881e-71
ADGRE2	1.75263e-75	0.633572	0.321	0.05	3.63215e-71
QARS	1.77006e-75	0.442743	0.494	0.124	3.66827e-71
SH3GLB1	1.87623e-75	0.525536	0.542	0.154	3.8883e-71
LBR	1.92135e-75	0.508065	0.538	0.147	3.9818e-71
EMC4	2.43191e-75	0.645863	0.271	0.033	5.03988e-71
APMAP	2.52777e-75	0.614334	0.229	0.017	5.23854e-71
CTDNEP1	2.57976e-75	0.557228	0.477	0.124	5.3463e-71
SLC38A1	2.88838e-75	0.635147	0.243	0.021	5.98587e-71
TMED4	3.10318e-75	0.648642	0.435	0.106	6.43104e-71
SVIP	3.63728e-75	0.64918	0.276	0.034	7.53789e-71
NOL12	3.93931e-75	0.641884	0.258	0.027	8.16382e-71
DSTN	5.0243e-75	0.550298	0.498	0.131	1.04124e-70
TSTA3	5.1905e-75	0.665784	0.295	0.043	1.07568e-70
RBM7	5.57816e-75	0.469068	0.466	0.115	1.15602e-70
POLR3GL	6.19727e-75	0.648428	0.274	0.034	1.28432e-70
UBE2H	6.64848e-75	0.452672	0.498	0.127	1.37783e-70
NKAPD1	1.0193e-74	0.643453	0.262	0.029	2.1124e-70
KRAS	1.06836e-74	0.488397	0.554	0.156	2.21406e-70
YIPF3	1.21502e-74	0.648365	0.272	0.033	2.51801e-70
CALM2	1.21678e-74	0.517443	0.683	0.222	2.52165e-70
DNAJC3	1.3226e-74	0.564553	0.439	0.106	2.74095e-70
MCRIP2	1.54875e-74	0.494125	0.449	0.109	3.20963e-70
CD63	1.63907e-74	0.574334	0.85	0.309	3.39681e-70
MRPS16	1.75802e-74	0.633209	0.283	0.038	3.64332e-70
POLR2K	1.78257e-74	0.627726	0.341	0.062	3.6942e-70
SUSD6	2.19615e-74	0.552804	0.335	0.056	4.5513e-70
RBM8A	2.21172e-74	0.481706	0.764	0.266	4.58356e-70
PLPP5	2.2151e-74	0.593256	0.271	0.032	4.59057e-70
CCDC88B	2.29015e-74	-2.03042	0.121	0.452	4.7461e-70
PSMC2	2.36889e-74	0.56403	0.308	0.046	4.90929e-70
MRPS23	2.40121e-74	0.630142	0.205	0.01	4.97627e-70
DGCR6L	2.58806e-74	0.696143	0.323	0.056	5.3635e-70
TRAM1	2.77533e-74	0.505361	0.561	0.161	5.7516e-70
FAM174C	3.08046e-74	0.695425	0.293	0.043	6.38394e-70
PLPPR3	3.11305e-74	0.441553	0.597	0.171	6.45149e-70
KCNQ1OT1	3.31822e-74	0.618368	0.43	0.098	6.87668e-70
KARS	3.3365e-74	0.640226	0.367	0.075	6.91455e-70
LSM14A	3.85797e-74	0.618756	0.349	0.066	7.99526e-70
RFX8	4.07285e-74	-2.14658	0.067	0.398	8.44057e-70
TNFSF13B	4.14517e-74	0.64288	0.383	0.082	8.59045e-70
NAA38	5.22787e-74	0.550824	0.623	0.191	1.08342e-69
UBE2M	5.28057e-74	0.408734	0.676	0.216	1.09435e-69
PLAGL1	6.0917e-74	0.558576	0.315	0.048	1.26244e-69
SERPING1	7.4703e-74	0.575626	0.168	0	1.54814e-69
COL4A5	7.4703e-74	0.609628	0.168	0	1.54814e-69
RETREG2	7.67813e-74	0.656864	0.268	0.032	1.59122e-69
ATP1B3	7.68047e-74	0.51359	0.4	0.086	1.5917e-69
MRPS26	8.46795e-74	0.609594	0.31	0.049	1.7549e-69
FKBP8	9.45044e-74	0.49248	0.684	0.225	1.95851e-69
ATP6V0E1	1.11735e-73	0.697138	0.276	0.037	2.3156e-69
MIF4GD	1.37331e-73	0.64057	0.205	0.011	2.84606e-69
S100Z	1.43125e-73	0.662423	0.257	0.028	2.96612e-69
BLOC1S2	1.71536e-73	0.526379	0.459	0.116	3.55491e-69
TLE3	1.72508e-73	0.521808	0.426	0.098	3.57505e-69
GAPDH	1.77e-73	0.629551	1	0.612	3.66815e-69
XBP1	2.29452e-73	0.595947	0.86	0.324	4.75517e-69
HDHD2	2.47802e-73	0.605119	0.226	0.017	5.13544e-69
GIPC1	2.61953e-73	0.568785	0.167	0	5.42871e-69
FAM177A1	4.46715e-73	0.575809	0.332	0.057	9.25772e-69
MYO15B	4.52168e-73	-1.99581	0.282	0.549	9.37073e-69
DDA1	5.47898e-73	0.679123	0.335	0.062	1.13546e-68
MYO1F	8.24948e-73	-1.89262	0.306	0.563	1.70962e-68
KRT17	9.17731e-73	0.638011	0.166	0	1.90191e-68
REST	9.23757e-73	0.478867	0.356	0.066	1.91439e-68
CNN2	9.72994e-73	0.640592	0.485	0.133	2.01643e-68
DBI	1.266e-72	0.527256	0.614	0.189	2.62367e-68
WDR61	1.52456e-72	0.646998	0.263	0.032	3.1595e-68
AGPAT2	1.69296e-72	0.55943	0.332	0.059	3.50849e-68
NCOA4	1.9507e-72	0.488705	0.571	0.172	4.04263e-68
RNF187	2.4529e-72	0.560302	0.329	0.057	5.0834e-68
MPP1	2.69264e-72	0.563972	0.366	0.072	5.58022e-68
NUDT2	3.2123e-72	0.580516	0.165	0	6.65717e-68
UBA52	3.33315e-72	0.794603	1	0.45	6.90761e-68
RPA3	3.4932e-72	0.667647	0.214	0.015	7.23931e-68
UQCC2	3.51754e-72	0.666481	0.317	0.055	7.28974e-68
PNN	4.63119e-72	-0.813373	0.954	0.782	9.59767e-68
MRPL12	5.55625e-72	0.562891	0.377	0.079	1.15148e-67
NT5C3A	7.6472e-72	0.563693	0.253	0.027	1.58481e-67
RPL41	8.40777e-72	0.555873	1	0.62	1.74243e-67
ENO1	9.27284e-72	0.711099	0.942	0.381	1.9217e-67
DTD1	9.43233e-72	0.64048	0.224	0.019	1.95476e-67
RICTOR	1.00481e-71	0.427431	0.61	0.184	2.08237e-67
CACUL1	1.04885e-71	0.539246	0.381	0.08	2.17363e-67
PRDX3	1.05043e-71	0.664696	0.242	0.025	2.17692e-67
ZNF136	1.19259e-71	0.560463	0.283	0.039	2.47152e-67
RTF1	1.24301e-71	0.408766	0.672	0.216	2.57602e-67
TXNDC17	1.25045e-71	0.603738	0.249	0.027	2.59144e-67
TCEA1	1.27383e-71	0.469498	0.513	0.141	2.6399e-67
PMAIP1	1.50847e-71	0.559554	0.772	0.279	3.12616e-67
WASHC3	1.5543e-71	0.6264	0.232	0.021	3.22114e-67
PTDSS1	1.60746e-71	0.679359	0.335	0.064	3.3313e-67
ELMO1	1.84584e-71	0.533634	0.366	0.072	3.82532e-67
GFER	2.02038e-71	0.613482	0.262	0.032	4.18704e-67
RUVBL2	2.20585e-71	0.63513	0.274	0.038	4.5714e-67
RCN1	2.27197e-71	0.569501	0.259	0.03	4.70842e-67
GALK1	2.31041e-71	0.597518	0.252	0.028	4.78809e-67
TYROBP	3.12242e-71	0.606967	0.692	0.224	6.4709e-67
MRPL48	3.27029e-71	0.620106	0.229	0.02	6.77735e-67
ETFRF1	3.6352e-71	0.585108	0.231	0.021	7.5336e-67
MIR4435-2HG	3.7228e-71	0.547377	0.255	0.028	7.71513e-67
TPGS1	3.7316e-71	0.531371	0.373	0.078	7.73336e-67
ITGA5	3.74847e-71	-1.70101	0.483	0.638	7.76832e-67
SLC5A10	3.92504e-71	0.549578	0.162	0	8.13425e-67
TCEA2	4.48724e-71	0.632912	0.275	0.038	9.29937e-67
RHOG	4.54643e-71	0.491305	0.667	0.221	9.42201e-67
UTP18	6.065e-71	0.55994	0.306	0.049	1.25691e-66
PSMD3	6.52509e-71	0.595997	0.288	0.042	1.35226e-66
LEPROT	9.3853e-71	0.522579	0.479	0.129	1.94501e-66
CRK	1.07686e-70	0.555297	0.275	0.036	2.23168e-66
MRPL23	1.25733e-70	0.552136	0.465	0.124	2.60569e-66
IFI44	1.37016e-70	0.586446	0.161	0	2.83952e-66
MDFI	1.37016e-70	0.595418	0.161	0	2.83952e-66
CCNH	1.37925e-70	0.585194	0.404	0.095	2.85836e-66
PARL	1.69473e-70	0.613567	0.352	0.073	3.51215e-66
TBC1D2B	2.22863e-70	0.481902	0.341	0.063	4.61861e-66
SLC25A11	2.50904e-70	0.568113	0.269	0.036	5.19973e-66
DRAM2	2.59943e-70	0.586448	0.324	0.06	5.38705e-66
MEF2D	3.03059e-70	-1.50665	0.575	0.655	6.28059e-66
BNIP1	4.20729e-70	0.511126	0.31	0.051	8.71919e-66
HACD4	4.32036e-70	0.577049	0.333	0.062	8.95351e-66
SF3A2	5.01806e-70	0.581302	0.39	0.088	1.03994e-65
UTP11	5.57832e-70	0.546854	0.316	0.055	1.15605e-65
URM1	5.76318e-70	0.602231	0.274	0.038	1.19436e-65
NPM2	6.02364e-70	0.564588	0.262	0.032	1.24834e-65
CD82	8.2408e-70	0.402202	0.492	0.128	1.70782e-65
TPGS2	8.79859e-70	0.613969	0.255	0.031	1.82342e-65
JUN	9.5508e-70	-0.758576	0.958	0.79	1.97931e-65
TARS	1.00951e-69	0.553981	0.34	0.065	2.0921e-65
PPA2	1.33491e-69	0.506662	0.314	0.054	2.76647e-65
WDFY2	1.37575e-69	-1.57304	0.488	0.63	2.85111e-65
HTRA3	1.58415e-69	0.580366	0.235	0.023	3.28299e-65
CAP1	2.48315e-69	0.554298	0.475	0.135	5.14608e-65
PPP1CA	2.77293e-69	0.535755	0.501	0.14	5.74662e-65
MRPL15	3.12267e-69	0.552356	0.199	0.011	6.47142e-65
TSR3	3.25133e-69	0.577281	0.241	0.026	6.73805e-65
MMP24OS	3.42584e-69	0.581232	0.41	0.1	7.0997e-65
RAB22A	3.69776e-69	0.563525	0.286	0.043	7.66324e-65
FAM160B1	4.822e-69	0.533869	0.385	0.084	9.9931e-65
SQOR	5.01659e-69	0.555199	0.212	0.016	1.03964e-64
NUCB1	5.03185e-69	0.625899	0.373	0.083	1.0428e-64
IMP4	5.10102e-69	0.485498	0.369	0.078	1.05714e-64
STAB1	5.61305e-69	0.316955	0.545	0.149	1.16325e-64
NAT14	5.79719e-69	0.542043	0.157	0	1.20141e-64
CD74	6.26614e-69	-0.747381	0.939	0.756	1.29859e-64
USP47	7.13627e-69	0.3786	0.563	0.168	1.47892e-64
C1orf122	8.73878e-69	0.624782	0.295	0.049	1.81102e-64
SLCO3A1	9.38101e-69	-2.1141	0.148	0.451	1.94412e-64
PSMG3	9.54697e-69	0.543258	0.287	0.043	1.97851e-64
UBA2	9.72612e-69	0.475286	0.412	0.098	2.01564e-64
TMEM160	9.88437e-69	0.421443	0.525	0.154	2.04844e-64
SUGT1	1.00718e-68	0.514048	0.321	0.057	2.08728e-64
KANSL1-AS1	1.05756e-68	0.630804	0.205	0.014	2.19169e-64
PPP6C	1.11563e-68	0.575677	0.283	0.042	2.31204e-64
MRPL32	1.19084e-68	0.523512	0.298	0.047	2.4679e-64
TIMM8B	1.25394e-68	0.633768	0.298	0.051	2.59866e-64
HMGB3	1.36421e-68	0.560838	0.275	0.039	2.8272e-64
GMPS	1.80078e-68	0.598716	0.266	0.037	3.73193e-64
GPX7	2.01645e-68	0.518014	0.156	0	4.1789e-64
ARL2BP	2.09182e-68	0.622468	0.283	0.043	4.33509e-64
MED6	2.29935e-68	0.497858	0.402	0.094	4.76517e-64
ISCU	2.52749e-68	0.416097	0.432	0.106	5.23797e-64
CYB5R3	2.71815e-68	0.602214	0.305	0.053	5.63309e-64
SREK1IP1	2.92449e-68	0.616288	0.317	0.057	6.06071e-64
RAP1A	3.67929e-68	0.571513	0.301	0.05	7.62495e-64
NDUFB3	3.71545e-68	0.646334	0.236	0.027	7.69989e-64
RMND5A	4.34509e-68	0.538329	0.332	0.063	9.00476e-64
MRPS34	4.73348e-68	0.53122	0.372	0.084	9.80967e-64
ADI1	5.38352e-68	0.625626	0.274	0.04	1.11568e-63
SAMD4B	5.50515e-68	0.423882	0.501	0.14	1.14089e-63
ZC3HAV1	5.62285e-68	0.452918	0.433	0.106	1.16528e-63
MSN	6.61359e-68	0.467675	0.772	0.281	1.3706e-63
PRPF6	7.5042e-68	0.577341	0.315	0.057	1.55517e-63
BCL7B	7.95589e-68	0.451439	0.414	0.1	1.64878e-63
MGAT4A	8.43789e-68	0.549849	0.196	0.011	1.74867e-63
MBOAT7	1.01167e-67	0.406744	0.556	0.171	2.09659e-63
B2M	1.0563e-67	-0.421887	0.996	0.871	2.18907e-63
GLRX	1.31353e-67	0.582416	0.229	0.024	2.72216e-63
CENPX	1.34941e-67	0.567556	0.28	0.043	2.79651e-63
RPL27A	1.41485e-67	0.671428	1	0.524	2.93213e-63
ENOSF1	1.49338e-67	0.510174	0.277	0.04	3.09488e-63
ZPR1	1.64233e-67	0.561156	0.282	0.044	3.40356e-63
MICAL1	1.75392e-67	-2.02407	0.137	0.443	3.63482e-63
OSER1	2.01532e-67	0.442276	0.504	0.143	4.17654e-63
LRPPRC	2.21696e-67	0.490877	0.375	0.083	4.59442e-63
SRD5A3	2.43314e-67	0.516749	0.154	0	5.04243e-63
PTPMT1	2.77686e-67	0.574106	0.277	0.042	5.75477e-63
ABCB7	2.94435e-67	0.47959	0.266	0.036	6.10187e-63
GRK2	3.86828e-67	-1.48809	0.615	0.671	8.01663e-63
DUSP2	3.97599e-67	0.647896	0.37	0.082	8.23984e-63
TMEM208	4.00774e-67	0.589934	0.26	0.035	8.30564e-63
LTA4H	4.42402e-67	0.589122	0.347	0.073	9.16835e-63
FUT4	4.49377e-67	-1.99506	0.206	0.488	9.31288e-63
NONO	4.96926e-67	0.448263	0.717	0.25	1.02983e-62
KDSR	5.06982e-67	0.589438	0.207	0.016	1.05067e-62
SNHG10	5.47881e-67	0.574639	0.254	0.032	1.13543e-62
TRAPPC4	5.89128e-67	0.516114	0.327	0.062	1.22091e-62
MPC1	6.32441e-67	0.562126	0.275	0.041	1.31067e-62
COA5	7.21594e-67	0.531588	0.246	0.029	1.49543e-62
CRYBG1	7.47447e-67	-1.97043	0.05	0.357	1.54901e-62
KIF9	7.73585e-67	0.563054	0.231	0.024	1.60318e-62
PDCL3	8.04979e-67	0.582549	0.188	0.01	1.66824e-62
GDE1	8.20838e-67	0.586196	0.251	0.032	1.7011e-62
MRPS18B	8.43925e-67	0.568186	0.194	0.012	1.74895e-62
ZBTB16	8.44063e-67	0.619211	0.153	0	1.74924e-62
TMEM70	8.5563e-67	0.567895	0.257	0.034	1.77321e-62
NIPSNAP1	8.75705e-67	0.587391	0.189	0.01	1.81481e-62
BID	9.185e-67	0.521056	0.339	0.07	1.9035e-62
SDHC	1.08602e-66	0.578234	0.277	0.043	2.25067e-62
ZNF529	1.22019e-66	0.574873	0.249	0.031	2.52871e-62
DAP3	1.3252e-66	0.428283	0.432	0.112	2.74634e-62
COMMD8	1.72416e-66	0.642216	0.23	0.025	3.57315e-62
ARF1	1.78602e-66	0.551864	0.908	0.352	3.70136e-62
DARS	2.15423e-66	0.484708	0.398	0.094	4.46443e-62
MPRIP	2.15497e-66	0.528112	0.268	0.039	4.46596e-62
PLEKHG2	2.40738e-66	-2.14074	0.034	0.337	4.98906e-62
PMVK	2.51937e-66	0.583313	0.197	0.013	5.22113e-62
MIR1-1HG-AS1	2.92548e-66	0.587099	0.151	0	6.06276e-62
ARID1B	3.00394e-66	0.431574	0.834	0.305	6.22536e-62
DNTTIP2	3.56529e-66	0.407477	0.604	0.192	7.3887e-62
PHC2	3.88134e-66	0.609761	0.211	0.018	8.04369e-62
UBE2E3	4.38951e-66	0.428398	0.414	0.101	9.09682e-62
BCL7C	4.7134e-66	0.683002	0.308	0.06	9.76804e-62
MPLKIP	6.14835e-66	0.562611	0.254	0.034	1.27418e-61
CSNK2A1	6.73266e-66	0.43549	0.437	0.114	1.39528e-61
MCFD2	6.90314e-66	0.517401	0.318	0.06	1.43061e-61
OSGIN2	6.97472e-66	0.42206	0.473	0.129	1.44544e-61
NUDT3	7.01779e-66	0.409735	0.475	0.13	1.45437e-61
NSFL1C	7.91166e-66	0.408817	0.412	0.099	1.63961e-61
JPX	8.73047e-66	0.354076	0.551	0.166	1.8093e-61
PGD	9.08171e-66	0.481807	0.438	0.117	1.88209e-61
RELL1	9.50186e-66	0.611995	0.234	0.026	1.96917e-61
CZIB	9.61748e-66	0.566898	0.248	0.032	1.99313e-61
PEMT	1.00183e-65	0.587456	0.209	0.018	2.0762e-61
TMEM220	1.01305e-65	0.51363	0.15	0	2.09945e-61
IL12A-AS1	1.01305e-65	0.560811	0.15	0	2.09945e-61
INTS10	1.06861e-65	0.440365	0.36	0.076	2.21458e-61
WDR33	1.10064e-65	0.461525	0.345	0.07	2.28097e-61
TIMP1	1.10785e-65	0.626597	0.535	0.173	2.29591e-61
CMSS1	1.18015e-65	0.512751	0.201	0.014	2.44574e-61
GOLPH3	1.28866e-65	0.52842	0.322	0.062	2.67062e-61
SUMF2	1.29891e-65	0.418722	0.588	0.187	2.69186e-61
HOTAIRM1	1.60446e-65	0.610431	0.385	0.094	3.32508e-61
NDUFA9	1.60522e-65	0.557471	0.257	0.035	3.32667e-61
AC025159.1	1.81505e-65	0.518468	0.358	0.078	3.76151e-61
LZIC	1.8958e-65	0.584225	0.207	0.017	3.92887e-61
BSDC1	3.10945e-65	0.381853	0.498	0.14	6.44402e-61
FAM219B	3.13878e-65	0.520787	0.274	0.041	6.50481e-61
ING4	3.47155e-65	0.588169	0.196	0.014	7.19444e-61
NDUFB6	3.90579e-65	0.590082	0.194	0.013	8.09435e-61
ZDHHC4	3.92913e-65	0.588456	0.206	0.017	8.14274e-61
CHMP3	3.95951e-65	0.655117	0.308	0.06	8.20569e-61
H2AFZ	5.0796e-65	0.426081	0.791	0.286	1.0527e-60
IMPA2	5.1576e-65	0.617247	0.218	0.022	1.06886e-60
RPAIN	6.32606e-65	0.466278	0.425	0.11	1.31101e-60
KYAT3	6.39619e-65	0.529942	0.185	0.01	1.32555e-60
DHRS11	6.76635e-65	0.549828	0.19	0.012	1.40226e-60
KPNA3	6.89503e-65	0.440105	0.333	0.065	1.42893e-60
VAT1	8.18428e-65	0.572491	0.207	0.017	1.69611e-60
SUCLG2	8.29686e-65	0.586011	0.238	0.03	1.71944e-60
SAP30	8.67404e-65	0.658474	0.275	0.045	1.79761e-60
ACOT13	8.69647e-65	0.576404	0.188	0.011	1.80226e-60
MFGE8	1.21157e-64	0.530428	0.148	0	2.51085e-60
CDKN2AIPNL	1.30964e-64	0.548346	0.237	0.028	2.71409e-60
BIK	1.37253e-64	0.468473	0.292	0.049	2.84444e-60
VPS29	1.40719e-64	0.475944	0.477	0.138	2.91626e-60
ZNF254	1.52358e-64	0.533418	0.249	0.032	3.15747e-60
RAB9A	1.90766e-64	0.485971	0.298	0.053	3.95344e-60
CD59	1.9931e-64	0.550499	0.236	0.028	4.13049e-60
CHMP5	2.10709e-64	0.539274	0.248	0.033	4.36674e-60
AGO2	2.14871e-64	0.483767	0.264	0.038	4.45299e-60
STAU1	2.15649e-64	0.574518	0.272	0.042	4.4691e-60
IFI6	3.06616e-64	0.635969	0.214	0.021	6.3543e-60
SRPK1	3.93549e-64	0.478912	0.332	0.066	8.15592e-60
LCP1	3.95196e-64	-1.39085	0.581	0.635	8.19005e-60
DCXR	4.13534e-64	0.557665	0.46	0.135	8.57008e-60
TCEAL9	4.18436e-64	0.53111	0.146	0	8.67166e-60
ZG16B	4.18436e-64	0.531364	0.146	0	8.67166e-60
RBM17	4.34936e-64	0.406314	0.496	0.144	9.01362e-60
CYCS	4.84152e-64	0.46037	0.801	0.292	1.00336e-59
M6PR	5.05349e-64	0.45199	0.437	0.116	1.04728e-59
HSPD1	5.50284e-64	-1.51517	0.766	0.701	1.14041e-59
FAM207A	6.10867e-64	0.541887	0.231	0.027	1.26596e-59
CSDE1	6.11382e-64	0.537288	0.895	0.346	1.26703e-59
DYNC1H1	7.32632e-64	0.393556	0.745	0.261	1.51831e-59
SH3BGRL3	8.24902e-64	0.730982	0.983	0.394	1.70953e-59
COPS5	9.79872e-64	0.537571	0.277	0.046	2.03069e-59
YY1	1.00842e-63	0.394257	0.7	0.247	2.08986e-59
OIP5-AS1	1.05243e-63	0.375603	0.49	0.143	2.18106e-59
PLTP	1.44386e-63	0.496005	0.145	0	2.99226e-59
CDKN1C	1.45854e-63	0.584829	0.263	0.039	3.02268e-59
MSRA	1.49313e-63	0.594124	0.277	0.046	3.09437e-59
COPZ1	1.64835e-63	0.674678	0.246	0.035	3.41604e-59
RFXANK	1.70687e-63	0.555999	0.322	0.066	3.53731e-59
AC004865.2	2.03139e-63	0.605443	0.192	0.014	4.20985e-59
AC026124.2	2.04987e-63	0.543537	0.255	0.036	4.24814e-59
NRIP1	2.08935e-63	0.40757	0.401	0.099	4.32998e-59
ALG5	2.85873e-63	0.526644	0.214	0.021	5.92444e-59
PRKAR1A	3.05029e-63	0.504464	0.409	0.107	6.32142e-59
EIF3G	3.26341e-63	0.557463	0.914	0.374	6.76308e-59
SEPTIN7	3.55683e-63	0.422382	0.734	0.262	7.37117e-59
FAM215B	3.64177e-63	0.518212	0.191	0.013	7.54721e-59
JAK1	3.66052e-63	0.505645	0.3	0.055	7.58606e-59
GFOD1	4.82004e-63	0.535868	0.217	0.021	9.98905e-59
SF3B4	4.89143e-63	0.561523	0.283	0.049	1.0137e-58
SNHG3	5.17054e-63	0.429259	0.772	0.28	1.07154e-58
TES	6.2692e-63	0.420072	0.506	0.153	1.29923e-58
SFXN4	7.04903e-63	0.536097	0.191	0.014	1.46084e-58
THUMPD3-AS1	7.28009e-63	0.394172	0.615	0.206	1.50873e-58
APLP2	7.452e-63	0.443419	0.709	0.258	1.54435e-58
IK	8.1203e-63	0.43026	0.404	0.101	1.68285e-58
CIAO2B	1.1102e-62	0.580456	0.366	0.09	2.30079e-58
QTRT1	1.3221e-62	0.47709	0.312	0.061	2.73992e-58
SKP1	1.59246e-62	0.54183	0.907	0.376	3.30022e-58
BORCS7	1.70856e-62	0.495005	0.306	0.058	3.54082e-58
ACSM3	1.71463e-62	0.552276	0.143	0	3.55339e-58
SF3A3	1.8001e-62	0.485201	0.278	0.046	3.73053e-58
TNFRSF12A	2.02782e-62	0.547552	0.31	0.061	4.20246e-58
SSR1	2.1615e-62	0.490304	0.366	0.087	4.47949e-58
TRAPPC3	2.18155e-62	0.554114	0.236	0.03	4.52105e-58
BSCL2	2.34474e-62	0.498946	0.252	0.036	4.85925e-58
IFT52	2.53171e-62	0.54862	0.2	0.017	5.24671e-58
SURF1	2.78268e-62	0.544972	0.308	0.061	5.76682e-58
CMTM7	2.80792e-62	0.565604	0.2	0.017	5.81913e-58
SH3D21	2.86456e-62	0.531935	0.214	0.021	5.93651e-58
HEXA	3.48922e-62	0.4173	0.594	0.198	7.23106e-58
CFDP1	3.88732e-62	0.422381	0.372	0.088	8.05609e-58
ZNF493	5.73368e-62	0.559396	0.258	0.038	1.18825e-57
PEX10	5.9009e-62	0.470527	0.142	0	1.2229e-57
DNAJB6	7.8768e-62	0.556358	0.937	0.399	1.63239e-57
ZDHHC2	9.17193e-62	0.532417	0.214	0.023	1.90079e-57
H2AFX	9.85782e-62	0.556988	0.343	0.077	2.04294e-57
RPARP-AS1	1.00597e-61	0.536082	0.211	0.021	2.08477e-57
MRPL44	1.04479e-61	0.462504	0.354	0.081	2.16523e-57
FRG1	1.14108e-61	0.548072	0.323	0.069	2.36478e-57
TMED10	1.17665e-61	0.468282	0.431	0.12	2.43849e-57
SPATA2	1.39501e-61	0.453209	0.315	0.063	2.89102e-57
HSPH1	1.42184e-61	-1.81781	0.423	0.577	2.94663e-57
STX10	1.51201e-61	0.51937	0.292	0.055	3.13349e-57
SLC35E1	1.65262e-61	0.427388	0.349	0.076	3.42488e-57
NT5C	1.75917e-61	0.464817	0.392	0.101	3.6457e-57
SBNO1	1.83904e-61	0.352697	0.511	0.154	3.81122e-57
DCTN6	1.98341e-61	0.484747	0.314	0.062	4.11041e-57
GPAT3	2.02901e-61	0.547825	0.14	0	4.20493e-57
THRAP3	2.03472e-61	0.491159	0.322	0.067	4.21675e-57
ZNF222	2.55034e-61	0.512883	0.165	0.006	5.28533e-57
PPID	2.73502e-61	0.529478	0.229	0.028	5.66805e-57
C12orf76	2.89605e-61	0.532747	0.197	0.017	6.00177e-57
CISD3	3.9856e-61	0.552884	0.201	0.019	8.25977e-57
SPART	4.65175e-61	0.396989	0.373	0.087	9.64028e-57
PCLAF	4.76582e-61	0.691983	0.217	0.025	9.87669e-57
NDUFS8	5.3735e-61	0.314571	0.602	0.203	1.1136e-56
NTHL1	5.72604e-61	0.510322	0.228	0.028	1.18666e-56
GUCY1A1	6.9706e-61	0.510162	0.139	0	1.44459e-56
ZNF32	6.9706e-61	0.500797	0.139	0	1.44459e-56
LINC02147	6.9706e-61	0.519742	0.139	0	1.44459e-56
PLAA	7.39532e-61	0.494734	0.3	0.058	1.53261e-56
PDCD7	8.02049e-61	0.545941	0.258	0.04	1.66217e-56
MEA1	9.83138e-61	0.543628	0.184	0.013	2.03745e-56
SELENOT	9.88801e-61	0.457612	0.443	0.126	2.04919e-56
RNF2	1.0291e-60	0.536926	0.173	0.01	2.1327e-56
C12orf45	1.1469e-60	0.559782	0.223	0.027	2.37684e-56
DDX54	1.28215e-60	0.404533	0.338	0.073	2.65713e-56
SNHG21	1.31389e-60	0.559888	0.205	0.02	2.7229e-56
ARPP19	1.49168e-60	0.358882	0.515	0.16	3.09135e-56
CREBRF	1.58842e-60	0.357886	0.585	0.188	3.29184e-56
VAV3	1.6327e-60	0.553118	0.28	0.049	3.38362e-56
NDUFAF6	1.71231e-60	0.501583	0.218	0.025	3.54859e-56
TEN1	2.56732e-60	0.434713	0.36	0.085	5.32052e-56
GANAB	3.41844e-60	0.493801	0.333	0.075	7.08438e-56
MAPK12	3.87345e-60	0.518457	0.192	0.016	8.02734e-56
FUOM	3.94915e-60	0.571587	0.201	0.02	8.18421e-56
SLC39A4	4.52868e-60	0.533009	0.184	0.014	9.38523e-56
BRIX1	4.97218e-60	0.465565	0.297	0.057	1.03043e-55
CDV3	6.11495e-60	0.35557	0.745	0.273	1.26726e-55
ATF3	6.21299e-60	0.392106	0.827	0.318	1.28758e-55
LTC4S	6.63752e-60	0.476088	0.528	0.168	1.37556e-55
ARHGAP22	8.20541e-60	0.517944	0.137	0	1.70049e-55
GCAT	8.20541e-60	0.472613	0.137	0	1.70049e-55
AIP	9.98519e-60	0.40886	0.403	0.107	2.06933e-55
EPRS	1.11877e-59	0.567921	0.24	0.034	2.31853e-55
GSDMD	1.22509e-59	0.384287	0.361	0.085	2.53887e-55
TMEM35B	1.34441e-59	0.51428	0.18	0.013	2.78616e-55
IFRD2	1.40659e-59	0.460902	0.206	0.021	2.91502e-55
MPEG1	1.47571e-59	-1.79285	0	0.265	3.05826e-55
TRIM33	1.53487e-59	0.371724	0.42	0.113	3.18087e-55
RPS27L	1.54236e-59	0.434119	0.598	0.204	3.19638e-55
CCL3	1.5975e-59	-1.9435	0.093	0.381	3.31065e-55
YDJC	1.71722e-59	0.525553	0.252	0.04	3.55877e-55
CFP	1.89561e-59	0.575705	0.322	0.07	3.92845e-55
CYC1	2.03543e-59	0.319848	0.615	0.21	4.21822e-55
FHIT	2.05685e-59	0.527627	0.183	0.013	4.26262e-55
CHPT1	2.12818e-59	0.540728	0.246	0.037	4.41045e-55
MED10	2.39559e-59	0.499721	0.289	0.055	4.96462e-55
TSPOAP1	2.65394e-59	0.395809	0.316	0.063	5.50002e-55
PSMD7	2.78972e-59	0.256892	0.557	0.177	5.78141e-55
MMP2	2.81155e-59	0.506428	0.136	0	5.82666e-55
NOLC1	3.46844e-59	0.477683	0.298	0.057	7.188e-55
RAB37	3.62477e-59	0.345984	0.516	0.162	7.51197e-55
JDP2	4.13201e-59	0.471059	0.22	0.026	8.56317e-55
VMA21	5.17953e-59	0.359395	0.49	0.147	1.07341e-54
NECTIN2	5.42374e-59	0.411754	0.369	0.09	1.12402e-54
C7orf50	5.61496e-59	0.537019	0.285	0.055	1.16364e-54
HPS1	5.74197e-59	0.437397	0.337	0.076	1.18996e-54
MRPL16	7.55195e-59	0.557723	0.214	0.026	1.56507e-54
STOM	1.19576e-58	0.511372	0.168	0.01	2.47809e-54
DEDD2	1.25723e-58	0.449077	0.377	0.095	2.60548e-54
ARMH3	1.28556e-58	0.538198	0.232	0.032	2.66419e-54
SNHG5	1.28719e-58	0.630126	0.961	0.404	2.66758e-54
CIR1	1.29843e-58	0.347536	0.531	0.168	2.69086e-54
ERVK3-1	1.33895e-58	0.467901	0.26	0.043	2.77485e-54
BBX	1.6994e-58	0.525102	0.237	0.034	3.52183e-54
C16orf87	1.9403e-58	0.413161	0.444	0.13	4.02108e-54
MED17	2.44012e-58	0.41803	0.427	0.118	5.0569e-54
TP53	2.75091e-58	0.572848	0.232	0.033	5.70099e-54
WDR48	2.92274e-58	0.427864	0.426	0.12	6.0571e-54
ZNF430	3.29236e-58	0.520344	0.245	0.038	6.82309e-54
NBEAL1	3.74865e-58	0.485599	0.251	0.04	7.7687e-54
STAR	4.06381e-58	0.530792	0.167	0.01	8.42183e-54
MS4A6A	4.13158e-58	-1.70565	0.01	0.276	8.56228e-54
IDH3G	4.2087e-58	0.396383	0.407	0.111	8.72211e-54
EIF4A2	4.53291e-58	-0.913787	0.868	0.718	9.394e-54
OGFOD3	4.68222e-58	0.50896	0.179	0.013	9.70343e-54
PAFAH1B2	4.82396e-58	0.342813	0.563	0.19	9.99718e-54
PAM16	7.12083e-58	0.439849	0.341	0.082	1.47572e-53
MRPL1	8.20513e-58	0.480993	0.226	0.031	1.70043e-53
CD244	8.76153e-58	0.522363	0.161	0.008	1.81574e-53
SYS1	8.83708e-58	0.468711	0.254	0.042	1.8314e-53
CSNK2A2	8.848e-58	0.512774	0.236	0.035	1.83366e-53
AARSD1	1.02438e-57	0.519924	0.234	0.034	2.12292e-53
COG3	1.03845e-57	0.443227	0.358	0.089	2.15208e-53
ERI3	1.07509e-57	0.414088	0.247	0.038	2.22802e-53
INKA1	1.12515e-57	0.506012	0.132	0	2.33177e-53
AIG1	1.12515e-57	0.485482	0.132	0	2.33177e-53
PTGER1	1.12515e-57	0.471958	0.132	0	2.33177e-53
TRAPPC5	1.17497e-57	0.401272	0.771	0.291	2.435e-53
LINC01268	1.2904e-57	0.508149	0.185	0.016	2.67423e-53
MED1	1.36851e-57	0.541774	0.224	0.03	2.8361e-53
EPC1	1.43918e-57	0.357207	0.694	0.257	2.98256e-53
MICU2	1.53863e-57	0.479829	0.258	0.043	3.18866e-53
VASP	1.65077e-57	0.397911	0.557	0.187	3.42106e-53
COPS4	1.85269e-57	0.422267	0.303	0.063	3.8395e-53
PCIF1	1.90394e-57	0.419234	0.335	0.077	3.94572e-53
WDFY1	2.05018e-57	-1.83392	0.142	0.414	4.2488e-53
APPL1	2.12393e-57	0.352675	0.444	0.128	4.40164e-53
ISOC2	2.16746e-57	0.544003	0.22	0.029	4.49185e-53
LIPA	2.21913e-57	0.512356	0.163	0.009	4.59893e-53
CSNK1E	2.37834e-57	0.412864	0.387	0.101	4.92887e-53
DDX52	2.44579e-57	0.283809	0.54	0.173	5.06866e-53
DECR1	2.52714e-57	0.444414	0.237	0.034	5.23724e-53
SVBP	2.5293e-57	0.58733	0.264	0.048	5.24172e-53
MRPL38	2.59999e-57	0.405732	0.301	0.062	5.38822e-53
SHFL	2.6105e-57	0.520224	0.215	0.027	5.40999e-53
SURF2	2.83592e-57	0.525437	0.18	0.014	5.87715e-53
TNFRSF25	2.9654e-57	0.479067	0.161	0.008	6.1455e-53
ANXA11	3.14732e-57	0.398576	0.477	0.15	6.5225e-53
ITM2A	3.84189e-57	0.505673	0.131	0	7.96194e-53
STMN3	3.84189e-57	0.481417	0.131	0	7.96194e-53
CBX3	3.91541e-57	0.28293	0.673	0.241	8.11429e-53
OARD1	4.47535e-57	0.497071	0.28	0.053	9.27471e-53
MAPKAPK5-AS1	5.20875e-57	0.48168	0.257	0.043	1.07946e-52
SORL1	5.75985e-57	0.487085	0.266	0.047	1.19367e-52
SLC25A33	6.27231e-57	0.500117	0.294	0.06	1.29987e-52
PAXIP1-AS1	7.29294e-57	0.480525	0.189	0.017	1.51139e-52
SMIM7	7.72197e-57	0.434079	0.324	0.075	1.6003e-52
ASPH	8.19703e-57	0.457745	0.26	0.045	1.69875e-52
SPPL3	8.79946e-57	0.439739	0.292	0.058	1.8236e-52
SBDS	1.03743e-56	0.389557	0.785	0.301	2.14998e-52
COA1	1.05157e-56	0.46822	0.191	0.019	2.17928e-52
ERN1	1.07276e-56	0.500554	0.255	0.043	2.22319e-52
NUBP2	1.15886e-56	0.492392	0.271	0.051	2.40162e-52
UBQLN1	1.21095e-56	0.361727	0.626	0.224	2.50957e-52
CREB3L2	1.24031e-56	0.434049	0.347	0.086	2.57042e-52
PSMC1	1.24814e-56	0.292659	0.472	0.142	2.58665e-52
LIMS1	1.35006e-56	0.432456	0.38	0.1	2.79787e-52
NPM3	1.67226e-56	0.566086	0.201	0.024	3.4656e-52
ABRAXAS1	1.88693e-56	0.494648	0.16	0.009	3.91047e-52
B4GALT1	1.90079e-56	0.548707	0.343	0.087	3.9392e-52
ANXA2	1.92462e-56	-1.80752	0.138	0.41	3.98859e-52
RBM15B	2.2142e-56	0.446274	0.232	0.034	4.58871e-52
FAAP20	2.43849e-56	0.258609	0.487	0.15	5.05352e-52
IRF8	2.51274e-56	-1.69165	0.015	0.276	5.20741e-52
SNHG4	2.78799e-56	0.444833	0.24	0.036	5.77782e-52
PELI1	2.87621e-56	0.302045	0.505	0.158	5.96067e-52
SFT2D1	2.96062e-56	0.557669	0.234	0.036	6.13558e-52
LAP3	2.96335e-56	0.289203	0.344	0.08	6.14124e-52
AL118516.1	2.97488e-56	0.515047	0.295	0.062	6.16513e-52
CERS2	3.11254e-56	0.487918	0.335	0.081	6.45043e-52
RRAGA	3.11469e-56	0.517678	0.215	0.028	6.45489e-52
NDUFA8	3.13692e-56	0.53923	0.18	0.016	6.50095e-52
IMP3	3.17983e-56	0.482709	0.211	0.026	6.58989e-52
DUSP11	3.46552e-56	0.485715	0.177	0.014	7.18195e-52
AL627171.2	3.56694e-56	-2.03918	0.077	0.35	7.39213e-52
ETV5	3.5927e-56	0.529349	0.327	0.078	7.44551e-52
BLOC1S4	3.97676e-56	0.524553	0.16	0.009	8.24143e-52
TMEM87A	4.0674e-56	0.491684	0.278	0.053	8.42928e-52
STRADB	4.46771e-56	0.469802	0.128	0	9.25887e-52
C3orf80	4.46771e-56	0.463828	0.128	0	9.25887e-52
STRBP	4.88364e-56	0.48262	0.191	0.019	1.01209e-51
POLD2	4.95839e-56	0.344997	0.366	0.091	1.02758e-51
PHF20	6.66917e-56	0.433804	0.361	0.093	1.38212e-51
GRAMD1A	7.19238e-56	0.512742	0.265	0.048	1.49055e-51
ARPC4	7.25429e-56	0.433938	0.513	0.166	1.50338e-51
LAMP2	8.30442e-56	0.36979	0.459	0.14	1.72101e-51
UFM1	9.19622e-56	0.317329	0.538	0.18	1.90583e-51
SURF4	9.8426e-56	0.386571	0.495	0.159	2.03978e-51
CTDSP2	1.03707e-55	0.475144	0.254	0.043	2.14922e-51
RBCK1	1.16131e-55	0.370354	0.34	0.082	2.40671e-51
CRIPT	1.17081e-55	0.407691	0.352	0.088	2.42638e-51
RHPN1	1.28048e-55	0.366557	0.293	0.058	2.65366e-51
GID8	1.31931e-55	0.428502	0.37	0.097	2.73413e-51
PPP2R2D	1.39069e-55	0.357798	0.354	0.088	2.88207e-51
CFD	1.43518e-55	0.617711	0.902	0.471	2.97428e-51
MPI	1.46832e-55	0.502964	0.166	0.011	3.04295e-51
HSPA5	1.51891e-55	-0.524669	0.976	0.858	3.1478e-51
MAPRE2	1.59213e-55	0.534012	0.165	0.011	3.29953e-51
SLC39A1	1.92348e-55	0.468388	0.173	0.013	3.98622e-51
ITGA2B	1.98048e-55	0.501073	0.159	0.009	4.10436e-51
STN1	2.2899e-55	0.480341	0.186	0.018	4.7456e-51
SAMM50	2.60992e-55	0.471904	0.241	0.039	5.40881e-51
SRFBP1	2.68418e-55	0.492152	0.174	0.014	5.5627e-51
TRAPPC2B	2.7416e-55	0.488281	0.168	0.012	5.68169e-51
PTBP1	3.18507e-55	0.278242	0.596	0.204	6.60073e-51
RREB1	3.28813e-55	0.29846	0.467	0.141	6.81432e-51
TMOD3	3.43725e-55	0.49246	0.283	0.057	7.12335e-51
NDUFAF2	3.46115e-55	0.492786	0.16	0.01	7.17288e-51
RNF138	3.56238e-55	0.39118	0.435	0.131	7.38267e-51
MRPL13	3.83158e-55	0.461984	0.186	0.018	7.94056e-51
CXXC5	4.33759e-55	0.321031	0.424	0.118	8.98923e-51
EXOSC6	4.83909e-55	0.304264	0.458	0.138	1.00285e-50
NUDT18	6.52349e-55	0.515242	0.192	0.021	1.35193e-50
GORASP2	6.673e-55	0.358235	0.278	0.053	1.38291e-50
SLC48A1	6.7539e-55	0.496832	0.15	0.006	1.39968e-50
IRF9	7.0659e-55	0.496543	0.315	0.071	1.46434e-50
NRBF2	7.589e-55	0.485084	0.186	0.018	1.57275e-50
PTPN11	7.9864e-55	0.536296	0.226	0.034	1.6551e-50
SUCLA2	1.03675e-54	0.443258	0.22	0.031	2.14857e-50
AAMP	1.06901e-54	0.446968	0.289	0.061	2.21542e-50
METRNL	1.11669e-54	0.30517	0.541	0.176	2.31424e-50
ALKBH5	1.25397e-54	0.465169	0.322	0.077	2.59873e-50
UNC119B	1.29145e-54	0.488695	0.156	0.009	2.6764e-50
TMEM11	1.40823e-54	0.400114	0.288	0.059	2.91841e-50
COMMD1	1.47221e-54	0.511074	0.186	0.019	3.051e-50
DENND6B	1.58479e-54	0.442945	0.308	0.069	3.28432e-50
MRPS9	1.5849e-54	0.433642	0.16	0.01	3.28455e-50
EIF4E2	1.64674e-54	0.469015	0.26	0.048	3.4127e-50
DAZAP1	1.65383e-54	0.358085	0.478	0.154	3.42741e-50
TMED1	1.75379e-54	0.436747	0.218	0.03	3.63455e-50
NINJ2	1.76028e-54	0.440649	0.125	0	3.648e-50
DUSP14	1.76028e-54	0.455087	0.125	0	3.648e-50
MPZL1	1.99367e-54	0.529583	0.18	0.017	4.13169e-50
MAGED2	2.65372e-54	0.495931	0.184	0.018	5.49956e-50
PRPS1	3.29754e-54	0.550014	0.214	0.031	6.83382e-50
PRR5	3.74194e-54	0.505273	0.16	0.01	7.75479e-50
CRIP1	3.78087e-54	-1.86969	0.16	0.42	7.83547e-50
RAD23B	4.1875e-54	0.448614	0.349	0.088	8.67817e-50
SSBP4	4.1987e-54	0.396523	0.337	0.083	8.70139e-50
USP22	4.66533e-54	0.275276	0.565	0.191	9.66843e-50
TMEM205	5.00442e-54	0.406217	0.459	0.146	1.03712e-49
CCDC25	5.14788e-54	0.497071	0.159	0.01	1.06685e-49
MRPL34	5.27564e-54	0.511602	0.224	0.034	1.09332e-49
PPP1R2	5.35937e-54	0.315754	0.643	0.233	1.11068e-49
CAPNS1	5.54409e-54	0.465793	0.467	0.148	1.14896e-49
ADGRG1	5.97953e-54	0.479644	0.123	0	1.2392e-49
ZNF709	5.97953e-54	0.518023	0.123	0	1.2392e-49
CENPH	6.06755e-54	0.450428	0.177	0.016	1.25744e-49
RAD23A	6.52491e-54	0.365779	0.485	0.16	1.35222e-49
SNRNP25	7.13646e-54	0.484742	0.226	0.035	1.47896e-49
MLEC	7.26115e-54	0.280467	0.408	0.114	1.5048e-49
LLPH	7.66972e-54	0.404741	0.414	0.122	1.58947e-49
SYNCRIP	7.81531e-54	0.336004	0.619	0.222	1.61964e-49
C22orf39	8.1351e-54	0.41065	0.294	0.064	1.68592e-49
RBM33	8.56514e-54	0.293416	0.439	0.131	1.77504e-49
METAP2	8.80929e-54	0.286552	0.571	0.197	1.82564e-49
NDUFS7	9.35528e-54	0.273812	0.563	0.191	1.93879e-49
POLR2G	9.63284e-54	0.481786	0.301	0.069	1.99631e-49
SORD	1.02411e-53	0.480394	0.165	0.012	2.12237e-49
DMAC2L	1.06175e-53	0.528502	0.211	0.029	2.20037e-49
PRKACB	1.06379e-53	0.4765	0.286	0.061	2.20459e-49
CLN5	1.33544e-53	0.50165	0.231	0.037	2.76756e-49
ZNF639	1.34447e-53	0.426043	0.231	0.036	2.78627e-49
SLC25A36	1.3606e-53	0.31711	0.805	0.317	2.8197e-49
SRGAP2	1.38835e-53	-1.70918	0.024	0.279	2.87722e-49
DDX39A	1.39856e-53	-1.7478	0.335	0.526	2.89837e-49
EDEM2	1.43102e-53	0.48156	0.22	0.032	2.96565e-49
ADIPOR1	1.62303e-53	0.421299	0.32	0.075	3.36356e-49
DNPEP	1.7681e-53	0.394828	0.266	0.051	3.66421e-49
MSANTD3	1.9038e-53	0.476971	0.154	0.009	3.94544e-49
EIF4A3	2.03562e-53	0.418149	0.297	0.065	4.21861e-49
HIST1H4C	2.08119e-53	0.417916	0.361	0.095	4.31307e-49
TIMM17B	2.10253e-53	0.518708	0.242	0.043	4.35728e-49
P2RX5	2.12176e-53	0.544007	0.151	0.008	4.39713e-49
CACYBP	2.13111e-53	0.385605	0.467	0.149	4.41651e-49
SMARCE1	2.2796e-53	0.307515	0.39	0.107	4.72424e-49
THG1L	2.38261e-53	0.478202	0.161	0.011	4.93773e-49
MBNL1	3.04697e-53	-1.10308	0.751	0.676	6.31455e-49
MCRIP1	3.38223e-53	0.37304	0.398	0.116	7.00933e-49
PHTF1	3.55106e-53	0.394291	0.311	0.071	7.35922e-49
VPS51	3.61953e-53	0.280188	0.546	0.184	7.50111e-49
USP12	4.12959e-53	0.413173	0.427	0.132	8.55816e-49
HAT1	4.22822e-53	0.325959	0.419	0.123	8.76256e-49
MARCH7	4.50815e-53	0.420443	0.241	0.04	9.3427e-49
TBCC	4.97436e-53	0.485952	0.263	0.051	1.03089e-48
RNF167	5.1926e-53	0.56425	0.217	0.033	1.07611e-48
RSRP1	5.39813e-53	-0.961885	0.804	0.695	1.11871e-48
CFAP410	5.8234e-53	0.442562	0.247	0.043	1.20684e-48
ZMYM5	5.98873e-53	0.410581	0.341	0.089	1.2411e-48
BLVRB	6.18334e-53	0.452698	0.323	0.079	1.28144e-48
MAN1A2	6.23646e-53	0.431146	0.294	0.065	1.29244e-48
TUSC2	7.46026e-53	0.528104	0.173	0.016	1.54606e-48
ADK	7.85261e-53	0.399457	0.276	0.057	1.62738e-48
PLSCR1	7.88779e-53	0.462764	0.178	0.017	1.63466e-48
RNF115	9.24766e-53	0.414359	0.318	0.077	1.91648e-48
PRAM1	1.04162e-52	0.324837	0.409	0.116	2.15865e-48
ZNF264	1.06358e-52	0.455648	0.155	0.01	2.20417e-48
FGR	1.09027e-52	-1.82264	0.045	0.302	2.25947e-48
FBXO33	1.15565e-52	0.377028	0.413	0.123	2.39497e-48
RNF6	1.23903e-52	0.50735	0.223	0.034	2.56776e-48
CCNA1	1.3037e-52	0.28779	0.413	0.118	2.70179e-48
CISD2	1.34301e-52	0.512617	0.18	0.019	2.78326e-48
PHACTR4	1.58274e-52	0.284989	0.423	0.123	3.28007e-48
AAMDC	1.58448e-52	0.456922	0.19	0.022	3.28367e-48
ROMO1	1.78612e-52	0.420973	0.452	0.146	3.70155e-48
TXNRD1	1.88164e-52	0.350857	0.362	0.095	3.89951e-48
RPUSD3	1.88765e-52	0.48711	0.189	0.021	3.91196e-48
DPM3	2.22026e-52	0.53483	0.32	0.081	4.60126e-48
LNCAROD	2.25279e-52	0.457574	0.165	0.013	4.66868e-48
TOP1	2.25787e-52	0.277823	0.559	0.19	4.67922e-48
PWP1	2.2998e-52	0.503007	0.176	0.017	4.76611e-48
AC116407.2	2.3318e-52	0.450845	0.12	0	4.83242e-48
POLR2E	2.4085e-52	0.408173	0.377	0.108	4.99137e-48
ZKSCAN1	2.56599e-52	0.344723	0.283	0.058	5.31777e-48
GPAA1	2.57404e-52	0.355533	0.317	0.076	5.33444e-48
PRPS2	2.62888e-52	0.472326	0.143	0.006	5.4481e-48
EEF1AKMT2	2.81721e-52	0.410334	0.252	0.046	5.83839e-48
ING5	3.16374e-52	0.381213	0.26	0.049	6.55653e-48
PRPF31	3.32579e-52	0.464611	0.266	0.055	6.89236e-48
AIMP1	3.40378e-52	0.263257	0.535	0.183	7.05398e-48
HMG20B	3.4102e-52	0.289953	0.404	0.116	7.06729e-48
NTPCR	3.41454e-52	0.488911	0.199	0.026	7.0763e-48
WDR43	3.58339e-52	0.264769	0.43	0.128	7.42621e-48
AHSA1	3.98605e-52	0.539682	0.317	0.08	8.2607e-48
AHCYL1	4.00119e-52	0.438502	0.298	0.068	8.29206e-48
RAB7A	4.2717e-52	0.336975	0.369	0.102	8.85268e-48
RCC2	4.49366e-52	0.355628	0.419	0.125	9.31266e-48
ARHGAP15	4.9068e-52	0.435154	0.308	0.073	1.01689e-47
TMEM173	5.12736e-52	0.264413	0.54	0.186	1.06259e-47
COX20	5.13657e-52	0.409067	0.383	0.108	1.0645e-47
G3BP1	5.3727e-52	0.391704	0.332	0.083	1.11344e-47
GOLGA7	5.67099e-52	0.428659	0.266	0.054	1.17526e-47
METTL21A	6.05927e-52	0.486633	0.213	0.031	1.25572e-47
TMEM242	6.76742e-52	0.434819	0.231	0.039	1.40248e-47
CHRAC1	7.56683e-52	0.494509	0.228	0.038	1.56815e-47
POLR2L	8.4505e-52	0.355096	0.611	0.219	1.75128e-47
DCAF13	9.57312e-52	0.480475	0.23	0.039	1.98393e-47
PHF5A	1.04985e-51	0.510245	0.18	0.02	2.17571e-47
ELAVL1	1.05211e-51	0.402855	0.332	0.085	2.18039e-47
SRI	1.26251e-51	0.32804	0.473	0.156	2.61643e-47
WDR18	1.3087e-51	0.46495	0.242	0.044	2.71216e-47
AC058791.1	1.33932e-51	0.595766	0.247	0.048	2.77561e-47
EXOC6	1.37115e-51	0.393004	0.263	0.051	2.84156e-47
CUTC	1.46261e-51	0.429802	0.171	0.016	3.03111e-47
BCL7A	1.57825e-51	0.414793	0.237	0.041	3.27076e-47
BCR	1.67436e-51	0.441407	0.23	0.038	3.46994e-47
LCOR	1.69043e-51	0.355012	0.437	0.134	3.50325e-47
NCBP2	1.69877e-51	0.44354	0.289	0.064	3.52053e-47
DNAJC21	1.7325e-51	0.311044	0.41	0.12	3.59044e-47
PCCB	1.78673e-51	0.430787	0.15	0.009	3.70281e-47
ARIH2	1.80929e-51	0.308622	0.329	0.082	3.74957e-47
LARP1	1.93341e-51	0.425555	0.305	0.071	4.0068e-47
RAE1	2.00715e-51	0.336159	0.347	0.091	4.15963e-47
BOLA3	2.1242e-51	0.444981	0.165	0.014	4.40219e-47
FARSA	2.14936e-51	0.442694	0.217	0.033	4.45433e-47
PSENEN	2.17869e-51	0.498418	0.191	0.024	4.51511e-47
NLE1	2.67006e-51	0.428083	0.117	0	5.53343e-47
NEU4	2.67006e-51	0.478745	0.117	0	5.53343e-47
MAPK1	2.77498e-51	0.408347	0.288	0.064	5.75086e-47
IMPAD1	2.90199e-51	0.409061	0.258	0.049	6.01409e-47
RSBN1	3.07038e-51	0.387176	0.346	0.091	6.36306e-47
NFE2L2	3.31921e-51	0.428108	0.289	0.064	6.87874e-47
TOP1MT	3.73427e-51	0.424571	0.375	0.108	7.7389e-47
MED8	3.98923e-51	0.454572	0.15	0.009	8.26728e-47
C5orf24	4.01467e-51	0.356596	0.34	0.087	8.31999e-47
DMAC2	4.2406e-51	0.46244	0.186	0.022	8.78821e-47
TMEM9	4.44708e-51	0.473212	0.205	0.029	9.21613e-47
AFMID	5.95974e-51	0.491064	0.169	0.016	1.2351e-46
PDHA1	6.03856e-51	0.25285	0.324	0.079	1.25143e-46
CMC1	6.52075e-51	0.449917	0.195	0.026	1.35136e-46
ZNF12	6.69521e-51	0.446401	0.228	0.038	1.38751e-46
BABAM2	7.2413e-51	0.432934	0.241	0.044	1.50069e-46
SRPRB	7.521e-51	0.444546	0.201	0.027	1.55865e-46
POLR1E	7.94993e-51	0.472555	0.159	0.012	1.64754e-46
CD2AP	8.33772e-51	0.449248	0.195	0.025	1.72791e-46
BRD2	8.57302e-51	-1.14836	0.72	0.657	1.77667e-46
ALDH5A1	9.02364e-51	0.406682	0.116	0	1.87006e-46
BCKDHB	9.02364e-51	0.405408	0.116	0	1.87006e-46
ZNF749	9.02364e-51	0.38108	0.116	0	1.87006e-46
R3HCC1	9.36912e-51	0.401768	0.172	0.017	1.94166e-46
BCL6	9.70189e-51	-1.94366	0.033	0.279	2.01062e-46
TMEM126B	1.05797e-50	0.458144	0.177	0.019	2.19254e-46
PDLIM2	1.12455e-50	0.435399	0.237	0.042	2.33053e-46
LGALS9	1.2123e-50	0.319346	0.584	0.215	2.51237e-46
ENDOG	1.35179e-50	0.463727	0.157	0.012	2.80145e-46
[truncated: 1,311 more rows]

## Sheet: PAVTLN-ALL-5vsD
gene_sym	p_val	avg_log2FC	pct.1	pct.2	p_val_adj
PARK7	0	1.73637	0.956	0.106	0
SRM	0	1.47586	0.799	0.061	0
DDOST	0	1.70884	0.911	0.071	0
EIF3I	0	1.49072	0.951	0.126	0
NDUFS5	0	1.72084	0.977	0.123	0
PRDX1	0	1.93729	0.943	0.072	0
TMEM59	0	1.66571	0.972	0.107	0
GADD45A	0	1.85862	0.909	0.048	0
TENT5C	0	1.41611	0.752	0.034	0
UFC1	0	1.65823	0.972	0.125	0
CREG1	0	1.44874	0.757	0.038	0
MPC2	0	1.49184	0.914	0.099	0
SELL	0	1.60847	0.745	0.021	0
PRDX6	0	1.90008	0.981	0.097	0
HNRNPU	0	-2.00022	0.98	0.972	0
LAPTM4A	0	1.54842	0.958	0.118	0
PTRHD1	0	1.58374	0.879	0.062	0
OST4	0	1.62136	0.974	0.123	0
COX7A2L	0	2.02057	0.961	0.072	0
CYTOR	0	1.6049	0.939	0.08	0
GYPC	0	2.1479	0.897	0.007	0
MZT2B	0	1.91449	0.99	0.139	0
MZT2A	0	1.59793	0.828	0.053	0
ZEB2	0	-2.98934	0.711	0.976	0
OLA1	0	1.70344	0.885	0.047	0
SUMO1	0	1.7624	0.959	0.085	0
EEF1B2	0	2.22181	1	0.21	0
ITM2C	0	1.71852	0.785	0.025	0
ANKRD28	0	-1.3428	0.999	0.966	0
IMPDH2	0	1.90002	0.957	0.064	0
SPCS1	0	1.64396	0.945	0.102	0
ARF4	0	1.49874	0.867	0.076	0
MTRNR2L12	0	-3.08499	0.925	0.998	0
CD96	0	1.35409	0.641	0.005	0
CCNL1	0	-2.11975	0.99	0.994	0
NDUFB5	0	1.79576	0.908	0.057	0
CYTL1	0	1.61428	0.694	0	0
OCIAD2	0	1.42251	0.724	0.023	0
SPINK2	0	2.22967	0.994	0.108	0
MTHFD2L	0	1.42554	0.755	0.032	0
HSD17B11	0	1.73325	0.889	0.047	0
PYURF	0	1.7104	0.804	0.014	0
OSTC	0	1.89283	0.941	0.068	0
NDUFS4	0	1.56459	0.788	0.032	0
BTF3	0	2.35421	1	0.173	0
NSA2	0	1.48376	0.961	0.129	0
TBCA	0	1.52899	0.921	0.112	0
EPB41L4A-AS1	0	1.71188	0.908	0.064	0
VDAC1	0	1.57769	0.792	0.036	0
CAMLG	0	1.64964	0.914	0.059	0
NPM1	0	1.96364	1	0.184	0
NHP2	0	1.46431	0.792	0.059	0
TMEM14C	0	1.52527	0.763	0.033	0
LSM2	0	1.61798	0.773	0.028	0
COX7A2	0	1.7264	0.956	0.109	0
SNX3	0	1.81164	0.969	0.087	0
CALHM6	0	1.4762	0.665	0	0
ABRACL	0	1.56481	0.787	0.04	0
DYNLT1	0	1.38638	0.696	0.02	0
NDUFA4	0	1.67865	0.992	0.152	0
LSM5	0	1.39003	0.799	0.062	0
PSMA2	0	1.4845	0.915	0.099	0
MDH2	0	1.50972	0.88	0.08	0
UXT	0	1.91034	0.971	0.086	0
IGBP1	0	1.50693	0.786	0.042	0
XIST	0	-1.8886	0.998	0.979	0
SH3BGRL	0	1.80251	0.977	0.104	0
BEX3	0	1.76402	0.8	0.009	0
SLC25A5	0	2.03196	0.996	0.143	0
CLU	0	2.0254	0.884	0.029	0
LEPROTL1	0	1.62317	0.878	0.059	0
EIF3E	0	2.11868	0.998	0.177	0
EIF3H	0	1.67589	0.996	0.175	0
LY6E	0	1.75412	0.819	0.036	0
CLTA	0	1.57888	0.898	0.07	0
ISCA1	0	1.73457	0.853	0.026	0
ATP6V1G1	0	1.62974	0.969	0.131	0
EGFL7	0	2.15163	0.903	0.005	0
SNHG7	0	1.74232	0.969	0.104	0
TALDO1	0	1.9499	0.98	0.112	0
CD81	0	1.47571	0.823	0.061	0
EIF3F	0	1.77826	0.99	0.154	0
NUCB2	0	1.82571	0.943	0.097	0
C1QTNF4	0	1.75712	0.783	0.016	0
PPP1R14B	0	1.7278	0.937	0.09	0
PRDX5	0	1.67067	0.956	0.11	0
NEAT1	0	-1.91096	1	0.988	0
MALAT1	0	-2.11124	1	1	0
CTSW	0	2.27025	0.955	0.032	0
LAMTOR1	0	1.69646	0.843	0.036	0
CLNS1A	0	1.70739	0.898	0.057	0
NDUFC2	0	1.42339	0.872	0.091	0
CASP4	0	1.58999	0.782	0.02	0
C11orf1	0	1.47944	0.693	0.01	0
IL18	0	1.37946	0.817	0.056	0
ATP5F1C	0	1.88322	0.961	0.084	0
VIM	0	-1.21125	1	0.983	0
PPA1	0	1.71456	0.959	0.117	0
NDUFB8	0	1.57669	0.884	0.086	0
PHB2	0	1.3704	0.946	0.121	0
MGST1	0	2.38535	0.934	0.008	0
LDHB	0	2.47969	1	0.102	0
C12orf75	0	1.50058	0.722	0.026	0
PEBP1	0	1.71833	0.968	0.115	0
SRSF9	0	1.51828	0.976	0.145	0
GTF3A	0	1.59398	0.946	0.11	0
POMP	0	1.44066	0.888	0.1	0
TSC22D1	0	1.67685	0.837	0.06	0
ESD	0	1.36158	0.818	0.057	0
EBPL	0	2.26276	0.967	0.033	0
COMMD6	0	1.9605	0.99	0.13	0
DAD1	0	1.54189	0.793	0.045	0
PSME1	0	1.60479	0.963	0.128	0
RTRAF	0	2.12219	0.996	0.095	0
NPC2	0	1.59191	0.904	0.087	0
SIVA1	0	1.38011	0.83	0.068	0
FAM30A	0	2.06875	0.886	0.001	0
NOP10	0	1.62586	0.917	0.081	0
RSL24D1	0	1.6703	0.995	0.173	0
COX5A	0	1.79057	0.977	0.112	0
SEC11A	0	1.58975	0.935	0.104	0
MPG	0	1.89522	0.932	0.057	0
NPW	0	1.75419	0.75	0.014	0
CKLF	0	1.53281	0.801	0.056	0
APRT	0	1.71368	0.986	0.147	0
C1QBP	0	2.02013	0.959	0.07	0
LRRC75A	0	2.07168	0.775	0.024	0
RAB5C	0	1.4237	0.786	0.047	0
PHB	0	1.43762	0.767	0.045	0
NME1	0	1.52282	0.778	0.052	0
NME2	0	2.29756	1	0.144	0
DDX5	0	-1.39743	0.999	0.967	0
SUMO2	0	1.77498	0.992	0.165	0
LGALS3BP	0	1.63375	0.728	0.006	0
MYL12B	0	1.77412	0.984	0.123	0
SNRPD1	0	1.42085	0.871	0.082	0
TMEM230	0	1.50201	0.835	0.055	0
SMIM26	0	1.56011	0.914	0.093	0
PRSS57	0	2.86312	0.993	0.004	0
GNA15	0	2.21898	0.964	0.034	0
SMIM24	0	2.47451	0.976	0.004	0
MYDGF	0	1.56762	0.903	0.09	0
ALKBH7	0	1.58943	0.903	0.074	0
EIF3K	0	1.85246	0.996	0.153	0
RABAC1	0	1.53201	0.852	0.073	0
FOSB	0	-1.55242	0.999	0.977	0
COMT	0	1.51876	0.88	0.086	0
RANBP1	0	1.64218	0.849	0.061	0
IGLL1	0	1.96764	0.788	0.014	0
DDT	0	1.63823	0.929	0.102	0
EIF3L	0	2.00465	0.987	0.104	0
TOMM22	0	1.73389	0.922	0.076	0
SYNGR1	0	1.51309	0.911	0.094	0
ST13	0	1.78396	0.971	0.109	0
ATP5PF	0	1.64933	0.926	0.094	0
CCT8	0	1.44688	0.938	0.113	0
ATP5PO	0	1.90612	0.975	0.085	0
MT-ND1	0	-1.57127	1	0.999	0
MT-ND2	0	-1.70702	1	0.999	0
MT-CO1	0	-1.99976	1	1	0
MT-CO2	0	-1.96752	1	1	0
MT-ATP6	0	-1.82824	1	0.999	0
MT-CO3	0	-1.84785	1	1	0
MT-ND3	0	-2.15228	1	1	0
MT-ND4L	0	-2.33485	0.989	0.991	0
MT-ND4	0	-1.90285	1	1	0
MT-ND5	0	-1.86844	0.999	0.994	0
MT-CYB	0	-1.49014	1	0.996	0
MLF1	0	1.67225	0.964	0.102	0
ID1	0	2.22037	0.842	0.019	0
TOMM6	0	1.49967	0.934	0.116	0
SNHG29	0	2.23814	1	0.209	0
IGFBP2	2.06827e-307	1.62975	0.618	0	4.28629e-303
SNRPE	2.51666e-307	1.42572	0.806	0.069	5.21553e-303
GNAI3	4.12693e-307	1.39478	0.87	0.087	8.55265e-303
DDAH2	4.03509e-306	1.39569	0.854	0.08	8.36232e-302
MTRNR2L8	1.63417e-305	-3.18988	0.488	0.932	3.38665e-301
TRA2B	1.64429e-305	-2.36411	0.824	0.946	3.40763e-301
SF3B6	1.0193e-304	1.55914	0.972	0.15	2.1124e-300
SELENOP	7.27011e-304	1.38772	0.612	0	1.50666e-299
JTB	1.0432e-303	1.32591	0.895	0.101	2.16193e-299
TMED2	1.59964e-303	1.33633	0.775	0.053	3.3151e-299
UQCRH	4.3066e-303	1.76954	0.999	0.187	8.92499e-299
HNRNPF	1.28485e-302	1.34804	0.821	0.07	2.66272e-298
SNRPF	1.9667e-302	1.49231	0.932	0.122	4.0758e-298
NBDY	3.91015e-302	1.3846	0.695	0.028	8.1034e-298
HNRNPA2B1	6.92188e-302	-1.59222	0.998	0.957	1.43449e-297
TSTD1	7.2858e-302	1.37216	0.665	0.018	1.50991e-297
ARPC3	1.72505e-301	1.71835	0.998	0.173	3.575e-297
COX7C	4.41095e-301	1.68873	0.996	0.158	9.14126e-297
ATP5PB	5.50452e-301	1.35079	0.864	0.091	1.14076e-296
HLA-DPA1	7.76375e-301	1.59279	0.943	0.134	1.60896e-296
SNHG8	7.91033e-299	1.62442	0.992	0.178	1.63934e-294
ACP1	1.00422e-298	1.27436	0.773	0.055	2.08116e-294
NENF	1.36919e-298	1.36625	0.809	0.072	2.8375e-294
ITM2B	2.00268e-298	1.60498	0.992	0.171	4.15036e-294
PFDN4	5.1021e-297	1.36307	0.728	0.044	1.05736e-292
PLCG2	6.62226e-297	-3.80114	0.287	0.907	1.3724e-292
TMEM14B	1.2651e-296	1.37003	0.693	0.032	2.62178e-292
SCCPDH	1.96239e-295	1.31592	0.66	0.019	4.06686e-291
PSMB6	4.89223e-295	1.26996	0.778	0.06	1.01387e-290
C19orf53	6.7009e-295	1.29619	0.901	0.111	1.3887e-290
NACA	2.43135e-294	1.6926	1	0.303	5.03874e-290
MDK	5.663e-294	1.43029	0.61	0.004	1.1736e-289
TATDN1	2.66738e-293	1.31384	0.689	0.03	5.52787e-289
GNG5	7.53823e-293	1.42316	0.941	0.137	1.56222e-288
JUND	4.21299e-292	-1.06348	1	0.982	8.73101e-288
SMS	4.63099e-292	1.29565	0.737	0.047	9.59726e-288
ETHE1	5.91886e-292	1.33567	0.669	0.024	1.22663e-287
RPS5	6.08285e-292	1.64401	1	0.321	1.26061e-287
CCT4	8.95777e-292	1.41465	0.968	0.146	1.85641e-287
NDUFB11	2.09026e-291	1.3961	0.95	0.137	4.33185e-287
ANAPC16	5.74955e-291	1.36688	0.83	0.09	1.19154e-286
APEX1	1.25846e-290	1.37405	0.962	0.139	2.60803e-286
GTF2B	7.72724e-290	1.34502	0.889	0.103	1.60139e-285
COX6C	9.51019e-290	1.49768	0.965	0.145	1.97089e-285
FIS1	1.5125e-289	1.3197	0.842	0.091	3.13451e-285
CCNG1	6.78871e-289	1.30682	0.714	0.041	1.40689e-284
RAB11FIP1	7.99393e-289	-2.08839	0.929	0.947	1.65666e-284
CCT7	8.34866e-289	1.36363	0.725	0.048	1.73018e-284
RNF7	1.58146e-288	1.27068	0.872	0.1	3.27741e-284
PAIP2	1.63118e-288	1.34565	0.943	0.13	3.38045e-284
MAGOH	2.58376e-288	1.31557	0.766	0.061	5.35458e-284
AKIRIN1	1.31835e-287	1.34365	0.961	0.138	2.73215e-283
TNFRSF12A	1.05277e-286	1.34534	0.772	0.061	2.18176e-282
LDHA	1.32036e-286	1.60452	0.992	0.174	2.73632e-282
MGST3	1.52063e-286	1.20796	0.872	0.1	3.15135e-282
GDI2	2.29343e-286	1.35297	0.915	0.123	4.75291e-282
THOC7	4.34974e-286	1.34769	0.751	0.06	9.0144e-282
NDUFB2	6.49932e-286	1.33284	0.843	0.098	1.34692e-281
BCAS2	1.87583e-285	1.27219	0.773	0.061	3.88746e-281
DCTN3	5.9927e-285	1.25519	0.795	0.073	1.24193e-280
GSTO1	8.02241e-285	1.27941	0.868	0.102	1.66256e-280
STOML2	1.8223e-284	1.28431	0.742	0.055	3.77653e-280
RAP1B	2.18662e-284	1.34329	0.959	0.135	4.53155e-280
CCT3	2.23388e-284	1.27483	0.758	0.061	4.6295e-280
NME4	3.41797e-284	1.2176	0.715	0.042	7.08341e-280
TXN	1.05553e-283	1.69728	0.998	0.195	2.18748e-279
RYBP	1.49295e-283	1.19191	0.789	0.064	3.09399e-279
LSM3	2.43643e-283	1.33482	0.746	0.058	5.04925e-279
SNU13	5.46285e-283	1.30319	0.937	0.132	1.13212e-278
NFKBIZ	7.09171e-283	-3.07308	0.492	0.907	1.46969e-278
SELENOF	1.81038e-282	1.29041	0.719	0.047	3.75184e-278
MRPL11	5.93494e-282	1.30933	0.697	0.041	1.22996e-277
UQCRFS1	8.05337e-282	1.25774	0.916	0.124	1.66898e-277
SF3B5	8.60645e-282	1.31955	0.911	0.126	1.7836e-277
ZCRB1	9.02878e-282	1.19741	0.702	0.039	1.87112e-277
PSMB1	1.00003e-281	1.31404	0.957	0.149	2.07246e-277
PSMB7	2.41064e-281	1.27142	0.78	0.07	4.99582e-277
TMEM123	4.09207e-281	1.24941	0.807	0.078	8.48041e-277
SSR3	4.48535e-281	1.21473	0.772	0.064	9.29543e-277
AHNAK	7.72918e-281	-2.22745	0.911	0.95	1.6018e-276
PSMG2	8.78537e-281	1.21442	0.819	0.083	1.82068e-276
TMEM256	1.67421e-280	1.34328	0.772	0.068	3.46963e-276
SLBP	9.18675e-280	1.31973	0.77	0.063	1.90386e-275
ATRAID	1.17654e-279	1.28405	0.722	0.049	2.43825e-275
NEDD8	1.98037e-278	1.34625	0.91	0.129	4.10413e-274
SAT1	2.11031e-278	-1.60622	0.994	0.944	4.37341e-274
EVA1B	2.7511e-278	1.29496	0.738	0.054	5.70138e-274
BRK1	5.29066e-278	1.33968	0.85	0.103	1.09644e-273
MSI2	5.55493e-278	1.21056	0.873	0.097	1.1512e-273
RWDD1	2.36726e-277	1.27359	0.749	0.059	4.90591e-273
DNPH1	6.37339e-277	1.30408	0.665	0.033	1.32082e-272
ZNF331	1.10332e-276	1.4181	0.638	0.02	2.28651e-272
UBE2L3	1.36358e-276	1.20557	0.883	0.112	2.82589e-272
DYNLL1	5.78803e-276	1.39463	0.902	0.127	1.19951e-271
BUD31	8.44412e-276	1.25884	0.927	0.134	1.74996e-271
HIGD2A	1.38806e-275	1.39493	0.95	0.146	2.87662e-271
PITHD1	2.96622e-275	1.25545	0.739	0.056	6.14719e-271
RILPL2	3.67591e-275	1.37284	0.976	0.155	7.61795e-271
SYPL1	3.75145e-275	1.20808	0.874	0.107	7.77451e-271
EMID1	3.45708e-274	1.22016	0.593	0.009	7.16445e-270
KDELR1	3.72358e-274	1.25268	0.773	0.07	7.71674e-270
TMEM147	4.17737e-274	1.26767	0.705	0.047	8.65718e-270
DNAJC1	6.73955e-274	1.22417	0.922	0.128	1.3967e-269
EID1	8.18057e-274	1.26521	0.809	0.088	1.69534e-269
TFDP2	1.44616e-273	1.19454	0.733	0.053	2.99702e-269
EIF3D	2.04052e-273	1.36893	0.981	0.177	4.22878e-269
EIF3M	5.20185e-273	1.40472	0.977	0.18	1.07803e-268
SNHG6	2.87943e-272	1.60698	0.998	0.183	5.96733e-268
RAB13	4.57121e-272	1.21641	0.699	0.042	9.47338e-268
GLRX5	4.33811e-271	1.21931	0.72	0.053	8.99031e-267
GIHCG	7.71204e-271	1.4084	0.929	0.147	1.59824e-266
GRHPR	8.46961e-271	1.16064	0.724	0.051	1.75524e-266
TIMM13	1.10525e-270	1.1953	0.898	0.123	2.29052e-266
RPL23A	1.65617e-270	1.75822	1	0.242	3.43225e-266
YWHAQ	1.93735e-270	1.2278	0.952	0.148	4.01497e-266
CCNB1IP1	2.07962e-270	1.18587	0.848	0.099	4.3098e-266
CD37	2.41135e-270	1.44489	0.988	0.177	4.99727e-266
MRPS36	4.00804e-270	1.27562	0.642	0.028	8.30627e-266
TMEM219	7.76338e-270	1.23482	0.764	0.07	1.60888e-265
COMMD7	1.77698e-269	1.16837	0.812	0.086	3.68261e-265
MRPS33	2.4024e-269	1.26843	0.677	0.041	4.97874e-265
HMGN3	7.09558e-269	1.18552	0.904	0.126	1.47049e-264
PTGES3	2.37732e-268	1.30071	0.938	0.145	4.92676e-264
CDK2AP1	4.01689e-268	1.22955	0.684	0.043	8.32461e-264
MLF2	4.22294e-268	1.19444	0.919	0.135	8.75162e-264
IAH1	1.86516e-267	1.22922	0.755	0.068	3.86535e-263
RBIS	2.80213e-267	1.21974	0.862	0.113	5.80713e-263
COX5B	3.3745e-267	1.39153	0.981	0.166	6.99331e-263
COX6A1	5.43653e-267	1.27932	0.941	0.151	1.12667e-262
COPS9	2.49018e-266	1.2678	0.774	0.078	5.16065e-262
RBM39	1.31108e-265	-1.34727	0.999	0.943	2.71709e-261
TMEM258	1.35774e-265	1.305	0.919	0.136	2.81377e-261
NDUFA5	2.12249e-265	1.22282	0.696	0.048	4.39864e-261
FAM162A	2.60157e-265	1.25906	0.717	0.058	5.39149e-261
UBE2S	2.62528e-265	1.28561	0.935	0.145	5.44062e-261
ATP6V1F	2.77021e-265	1.29983	0.945	0.153	5.74099e-261
BST2	2.0476e-263	1.35332	0.947	0.157	4.24346e-259
SNRPB	2.60673e-263	1.35435	0.971	0.173	5.40219e-259
GNG10	8.95715e-263	1.1895	0.621	0.024	1.85628e-258
SELENOK	2.77306e-262	1.1932	0.894	0.125	5.74689e-258
ATP5PD	3.73377e-262	1.28385	0.714	0.059	7.73787e-258
TAF9	9.51525e-262	1.08087	0.874	0.107	1.97194e-257
POLR1D	1.53362e-261	1.42852	0.996	0.189	3.17828e-257
VDAC2	1.85305e-261	1.30052	0.98	0.173	3.84025e-257
PYCARD	2.53489e-261	1.34095	0.895	0.13	5.25331e-257
RPL28	4.7126e-261	-0.946879	1	0.972	9.76639e-257
AIF1	2.59772e-260	1.65922	0.999	0.206	5.38352e-256
SSR2	5.15565e-260	1.24778	0.946	0.156	1.06846e-255
RTN3	1.25817e-259	1.19264	0.734	0.063	2.60742e-255
NOL7	5.44409e-259	1.08767	0.737	0.064	1.12823e-254
PFDN2	1.23771e-258	1.26275	0.952	0.159	2.56504e-254
CHURC1	2.80565e-258	1.20361	0.78	0.085	5.81443e-254
RPL10A	1.57806e-257	1.534	1	0.332	3.27038e-253
ZFAND1	8.32177e-257	1.17866	0.641	0.034	1.7246e-252
PRELID1	9.3086e-257	1.27543	0.94	0.158	1.92911e-252
SERPINB1	1.02702e-256	1.53997	0.999	0.221	2.1284e-252
TPSB2	1.26875e-256	1.23495	0.572	0.011	2.62936e-252
SOD1	6.28735e-256	1.19639	0.717	0.061	1.30299e-251
SNRPC	8.40395e-256	1.15394	0.74	0.07	1.74163e-251
MYL12A	1.09787e-255	1.2812	0.907	0.14	2.27523e-251
PDCD2	1.60714e-255	1.16115	0.653	0.04	3.33064e-251
NDUFB4	8.2435e-255	1.20405	0.755	0.079	1.70838e-250
ATP5MD	1.87851e-254	1.21781	0.884	0.124	3.89302e-250
PTMA	1.88564e-254	-1.02659	1	0.958	3.90781e-250
SYAP1	3.64874e-254	1.12689	0.774	0.08	7.56164e-250
ERP29	4.72328e-254	1.3001	0.972	0.177	9.78853e-250
PPIB	5.21882e-254	1.31872	0.946	0.166	1.08155e-249
SNHG16	1.32756e-253	1.04638	0.809	0.094	2.75124e-249
STRAP	2.02938e-253	1.20567	0.952	0.162	4.20569e-249
ATP5MG	3.37879e-253	1.56335	0.999	0.201	7.00221e-249
PRTN3	5.10862e-253	1.61556	0.543	0.005	1.05871e-248
SPCS2	5.6456e-252	1.16161	0.685	0.053	1.17e-247
RPL12	7.90841e-252	1.58404	1	0.285	1.63894e-247
GADD45GIP1	9.93111e-252	1.0904	0.809	0.095	2.05812e-247
PTGER4	1.05208e-251	-2.66173	0.618	0.888	2.18033e-247
TXN2	1.06268e-251	1.22049	0.683	0.054	2.2023e-247
ATP5MC1	1.56374e-251	1.25188	0.806	0.1	3.24069e-247
AP2M1	3.67717e-251	1.19726	0.779	0.09	7.62058e-247
IDH2	7.62257e-251	1.12569	0.691	0.054	1.5797e-246
EMC6	9.10933e-251	1.14231	0.657	0.041	1.88782e-246
ERGIC3	1.18105e-250	1.10664	0.804	0.096	2.44761e-246
MRPS21	1.30238e-250	1.19442	0.766	0.086	2.69906e-246
PSME2	2.19057e-250	1.19005	0.74	0.075	4.53973e-246
PGLS	4.86015e-250	1.22608	0.908	0.153	1.00722e-245
GTF3C6	1.01963e-249	1.15606	0.642	0.039	2.11307e-245
YRDC	1.43485e-249	1.20691	0.628	0.033	2.97359e-245
ATP2C1	1.79914e-249	1.079	0.83	0.1	3.72854e-245
SARAF	5.32435e-249	1.24672	0.981	0.185	1.10342e-244
BEX4	7.29078e-249	1.13673	0.746	0.076	1.51094e-244
LSM4	1.19752e-248	1.13579	0.72	0.066	2.48174e-244
C1D	1.41482e-248	1.07222	0.717	0.063	2.93207e-244
MED28	2.65006e-248	1.02845	0.755	0.074	5.49198e-244
BCAP31	2.66822e-248	1.14182	0.792	0.098	5.52961e-244
TPM4	3.7861e-248	1.19263	0.929	0.141	7.84631e-244
AHCY	4.32065e-248	1.1972	0.614	0.031	8.95412e-244
BTF3L4	5.6659e-248	1.12396	0.693	0.057	1.1742e-243
SMDT1	1.05149e-247	1.09275	0.687	0.055	2.1791e-243
GHITM	4.18628e-247	1.07431	0.83	0.106	8.67565e-243
CNIH1	6.43461e-247	1.09833	0.742	0.073	1.33351e-242
PRSS21	1.07858e-246	0.969572	0.766	0.079	2.23525e-242
RTF2	3.18461e-246	1.09461	0.744	0.077	6.59979e-242
RAB2A	3.39347e-246	1.10031	0.835	0.113	7.03263e-242
LYL1	3.5388e-246	1.1009	0.726	0.068	7.3338e-242
HEBP1	4.01553e-246	1.16583	0.573	0.018	8.32178e-242
SRP72	6.06012e-246	1.07263	0.818	0.106	1.2559e-241
HINT1	6.87847e-246	1.57326	1	0.295	1.42549e-241
ARPC5L	1.12236e-245	1.08558	0.904	0.136	2.32599e-241
ADA	8.03501e-245	1.05082	0.64	0.037	1.66517e-240
TWF2	9.90012e-245	1.12876	0.676	0.053	2.0517e-240
SSBP2	1.12121e-244	1.14094	0.591	0.024	2.32359e-240
CAMTA1	4.55693e-244	1.16925	0.715	0.071	9.44378e-240
GCSH	7.54123e-244	1.11608	0.532	0.007	1.56284e-239
PCBD1	2.14537e-243	1.21845	0.59	0.028	4.44607e-239
YWHAG	4.95531e-243	1.03267	0.727	0.07	1.02694e-238
CPVL	7.96945e-243	1.2194	0.568	0.018	1.65159e-238
STK17A	8.12693e-243	1.16598	0.554	0.013	1.68423e-238
CUTA	1.85695e-242	1.11351	0.892	0.142	3.84834e-238
NDUFAB1	4.01084e-242	1.17861	0.622	0.038	8.31207e-238
RPS10	5.74021e-242	1.56939	1	0.205	1.1896e-237
PSMB3	6.11236e-242	1.15726	0.804	0.107	1.26673e-237
ICAM3	8.48483e-242	1.20163	0.977	0.184	1.7584e-237
ATP5MF	8.62143e-242	1.17583	0.855	0.124	1.7867e-237
TXNL4A	9.4425e-242	1.13068	0.645	0.044	1.95686e-237
PDCD6	1.30372e-241	1.04426	0.675	0.053	2.70183e-237
RBM3	1.60952e-241	1.35891	0.996	0.22	3.33557e-237
ERH	4.18556e-241	1.16153	0.682	0.06	8.67416e-237
MAX	6.38632e-241	0.997578	0.797	0.093	1.3235e-236
NPR3	6.70244e-241	1.14314	0.502	0	1.38901e-236
TOMM5	2.67165e-240	1.10763	0.663	0.053	5.53673e-236
PSMA5	2.75599e-240	1.11216	0.682	0.058	5.71152e-236
EIF4H	1.34787e-239	1.04414	0.871	0.131	2.79332e-235
ECHS1	1.71488e-239	1.12484	0.669	0.055	3.55393e-235
MAFF	2.48894e-239	1.11886	0.886	0.135	5.15808e-235
FDX1	2.98489e-239	1.11072	0.709	0.067	6.18589e-235
H3F3B	4.11669e-239	-0.901858	1	0.966	8.53143e-235
TMEM50A	5.41356e-239	1.06005	0.761	0.089	1.12191e-234
PRMT1	9.97612e-239	1.1201	0.795	0.103	2.06745e-234
PSMC5	1.32633e-238	1.12427	0.699	0.067	2.74869e-234
TRIR	2.00287e-238	1.20907	0.957	0.176	4.15075e-234
NDFIP1	4.98957e-238	1.0209	0.744	0.077	1.03404e-233
AHR	1.15557e-237	-2.39381	0.739	0.884	2.39481e-233
MOB4	1.88968e-237	1.02253	0.699	0.063	3.91618e-233
TRMT112	2.65919e-237	1.16793	0.776	0.099	5.51091e-233
ATXN10	3.60841e-237	1.1344	0.598	0.032	7.47807e-233
JPT1	4.11671e-237	1.11334	0.672	0.055	8.53147e-233
RPL6	7.27806e-237	1.54249	1	0.307	1.50831e-232
TUBA1B	1.26695e-236	1.33972	0.986	0.203	2.62563e-232
RPN2	1.52804e-236	1.10271	0.841	0.123	3.1667e-232
PSMA7	2.33934e-236	1.12562	0.946	0.173	4.84806e-232
PUF60	2.8533e-236	0.996732	0.772	0.093	5.91318e-232
MEAF6	3.32718e-236	1.12933	0.618	0.039	6.89525e-232
RPS15A	4.51292e-236	1.42138	1	0.335	9.35258e-232
NFATC1	4.5309e-236	1.17194	0.559	0.018	9.38984e-232
HOXB2	1.20792e-235	1.03845	0.736	0.077	2.5033e-231
RPS19BP1	1.28701e-235	1.02648	0.724	0.077	2.66721e-231
PLP2	1.75417e-235	1.19404	0.964	0.187	3.63534e-231
NDUFAF8	1.92411e-235	1.07568	0.713	0.075	3.98753e-231
GABARAPL2	5.68766e-235	1.08798	0.847	0.125	1.17871e-230
DSTN	6.9916e-235	1.137	0.859	0.131	1.44894e-230
GGCT	1.33835e-234	1.09012	0.616	0.039	2.77359e-230
TMED9	4.45137e-234	1.08835	0.717	0.075	9.22501e-230
SEM1	1.48418e-233	1.09589	0.843	0.123	3.07582e-229
TMSB4X	1.51064e-233	-1.24285	0.999	0.911	3.13065e-229
IRF2BP2	2.20752e-233	-1.86761	0.909	0.893	4.57487e-229
HPRT1	2.77983e-233	1.06848	0.693	0.065	5.76093e-229
HADHA	3.0611e-233	1.00527	0.824	0.115	6.34382e-229
LSM7	6.31394e-233	1.20164	0.975	0.193	1.3085e-228
UQCR11	8.40635e-233	1.18632	0.927	0.152	1.74213e-228
UQCR10	1.42251e-232	1.12544	0.724	0.079	2.948e-228
KRTCAP2	1.4707e-232	1.01705	0.866	0.135	3.04787e-228
FBL	2.17895e-232	1.07558	0.828	0.123	4.51565e-228
RAB4A	2.90939e-232	1.0982	0.616	0.04	6.02943e-228
NFKBIA	4.24891e-232	-1.66734	0.971	0.911	8.80543e-228
TUBB	4.36144e-232	1.11412	0.811	0.114	9.03864e-228
TMED3	4.88799e-232	1.14414	0.623	0.043	1.01299e-227
STMP1	7.97474e-232	1.05159	0.868	0.137	1.65269e-227
FKBP1A	1.82711e-231	1.13446	0.891	0.149	3.7865e-227
FAM177A1	2.31759e-231	1.04355	0.673	0.057	4.80297e-227
SEPTIN6	2.90425e-231	1.08016	0.938	0.176	6.01878e-227
RPL22	4.56192e-231	1.5833	1	0.251	9.45412e-227
BCL2A1	2.0028e-230	1.07306	0.65	0.05	4.15061e-226
HHEX	8.38965e-230	1.03002	0.757	0.087	1.73867e-225
SELENOH	1.31369e-229	1.14038	0.951	0.177	2.72249e-225
ANAPC11	2.05374e-229	1.10489	0.675	0.064	4.25618e-225
NDUFB10	2.30642e-229	1.067	0.825	0.122	4.77983e-225
PABPC1	2.62386e-229	-0.971628	1	0.928	5.43769e-225
SNRPD2	2.69037e-229	1.15993	0.963	0.189	5.57552e-225
HEBP2	2.69454e-229	0.989394	0.78	0.101	5.58416e-225
TXNDC12	3.26094e-229	1.11003	0.565	0.025	6.75798e-225
IFITM2	9.24351e-229	1.13553	0.819	0.122	1.91563e-224
PPT1	2.88962e-228	1.1042	0.638	0.05	5.98845e-224
PLIN3	3.73697e-228	0.98197	0.788	0.104	7.74449e-224
CRBN	1.33093e-227	0.972726	0.64	0.047	2.75821e-223
TOMM7	1.33511e-227	1.34739	0.993	0.203	2.76688e-223
FHL3	1.70853e-227	1.0989	0.533	0.016	3.54075e-223
RAB32	4.0361e-227	1.04023	0.661	0.058	8.36442e-223
MED30	4.4585e-227	1.03828	0.65	0.053	9.23979e-223
ECH1	6.18644e-227	1.0302	0.737	0.087	1.28208e-222
TMBIM6	1.35133e-226	1.12211	0.929	0.173	2.8005e-222
MYL6B	1.57961e-226	1.12164	0.578	0.032	3.27358e-222
C19orf48	2.98923e-226	1.00896	0.642	0.048	6.19488e-222
ARPC1A	3.7955e-226	1.00046	0.579	0.029	7.86579e-222
KDELR2	3.80197e-226	1.0364	0.622	0.044	7.8792e-222
RPL26	4.63649e-226	1.41951	1	0.346	9.60866e-222
SRP9	1.26096e-225	0.990547	0.691	0.069	2.61322e-221
AURKAIP1	1.67158e-225	1.02771	0.726	0.084	3.46418e-221
AK5	3.72166e-225	1.11855	0.532	0.017	7.71276e-221
C9orf16	6.26279e-225	1.12354	0.968	0.191	1.2979e-220
UBE2V1	1.56269e-224	1.00222	0.763	0.098	3.23851e-220
YES1	1.74437e-224	1.0823	0.52	0.013	3.61503e-220
MAPRE1	2.31135e-224	1.01102	0.867	0.143	4.79004e-220
WASF2	2.54449e-224	0.944931	0.719	0.077	5.27321e-220
RUNX1	4.13294e-224	0.965778	0.84	0.123	8.56511e-220
DDX3X	5.63744e-224	-1.71855	0.972	0.901	1.1683e-219
MICOS13	6.86243e-224	0.957553	0.839	0.126	1.42217e-219
SSBP1	7.99821e-224	0.942085	0.824	0.12	1.65755e-219
SNX2	2.22507e-223	0.959323	0.764	0.095	4.61124e-219
CNBP	3.33548e-223	0.990566	0.788	0.11	6.91245e-219
RAC1	5.87987e-223	1.06367	0.964	0.194	1.21855e-218
GLTP	2.91294e-222	1.00357	0.605	0.04	6.03677e-218
PDIA6	4.68946e-222	1.05211	0.85	0.142	9.71844e-218
HNRNPH1	6.81875e-222	-1.40101	0.986	0.888	1.41312e-217
ANP32B	7.33174e-222	1.14847	0.977	0.201	1.51943e-217
PQBP1	8.54735e-222	1.04604	0.661	0.063	1.77135e-217
GMFG	8.80115e-222	1.23549	0.982	0.192	1.82395e-217
TXNIP	1.04076e-221	1.15973	0.867	0.146	2.15686e-217
DNAJC8	1.26514e-221	1.00867	0.693	0.075	2.62188e-217
NCK1	1.41917e-221	1.0148	0.591	0.035	2.94109e-217
TRAPPC6A	1.47265e-221	0.984389	0.755	0.097	3.05192e-217
KHDRBS1	2.361e-221	1.04259	0.944	0.18	4.89294e-217
CHID1	2.92166e-221	1.05984	0.581	0.035	6.05485e-217
MGST2	3.04274e-221	1.1474	0.61	0.049	6.30577e-217
NOP53	3.25035e-221	1.34208	0.998	0.239	6.73602e-217
CSTB	6.91292e-221	0.987259	0.827	0.127	1.43263e-216
RNASET2	5.31437e-220	1.18687	0.977	0.213	1.10135e-215
PDRG1	1.84115e-219	1.0032	0.58	0.034	3.8156e-215
MRPL51	3.60616e-219	1.0783	0.599	0.043	7.4734e-215
KLF6	7.69506e-219	-1.10407	0.998	0.917	1.59472e-214
TUBA1C	1.14523e-218	0.973867	0.858	0.138	2.37337e-214
LRRC59	1.21241e-218	0.997543	0.605	0.043	2.5126e-214
EIF2S3	1.81382e-218	1.23684	0.986	0.222	3.75896e-214
HLA-DPB1	3.60663e-218	1.19624	0.895	0.164	7.47438e-214
UQCRB	5.42182e-218	1.43998	1	0.245	1.12362e-213
C11orf74	6.62436e-218	1.06118	0.519	0.018	1.37283e-213
IFT57	6.93385e-218	0.99575	0.572	0.032	1.43697e-213
PRPF38A	9.50007e-218	0.9306	0.711	0.08	1.96879e-213
RCN2	1.34364e-217	0.957632	0.659	0.061	2.78456e-213
TMEM126A	2.27449e-217	1.05111	0.562	0.032	4.71365e-213
RPSA	2.60677e-217	1.3756	1	0.357	5.40226e-213
CWC15	4.24475e-217	0.90476	0.694	0.076	8.79682e-213
MRPL47	4.25286e-217	1.04134	0.6	0.045	8.81362e-213
SRP14	5.10137e-217	1.42126	1	0.24	1.05721e-212
RAN	7.02689e-217	1.1876	0.988	0.22	1.45625e-212
LMAN2	1.08821e-216	0.96219	0.737	0.093	2.25521e-212
RHEB	3.08531e-216	0.858926	0.877	0.146	6.394e-212
CCT6A	3.36307e-216	0.961227	0.762	0.104	6.96962e-212
RPL30	3.60276e-216	1.37763	1	0.333	7.46635e-212
ILF2	4.99545e-216	0.990999	0.947	0.183	1.03526e-211
GMPR2	5.15893e-216	1.06394	0.511	0.016	1.06914e-211
SERP1	6.23684e-216	1.25913	0.99	0.218	1.29252e-211
CFAP36	8.6646e-216	1.02091	0.511	0.014	1.79565e-211
ORAI3	1.28604e-215	1.0838	0.578	0.038	2.66518e-211
CD52	1.65216e-215	1.02384	0.733	0.09	3.42395e-211
SSR4	1.75056e-215	1.20438	0.988	0.221	3.62787e-211
CD99	3.63475e-215	1.03584	0.929	0.177	7.53266e-211
RPS12	5.57042e-215	1.37167	1	0.341	1.15441e-210
UBE2L6	8.09442e-215	1.05222	0.505	0.014	1.67749e-210
C1orf43	1.03454e-214	1.03249	0.568	0.035	2.14398e-210
TOMM20	1.29395e-214	1.21736	0.992	0.227	2.68159e-210
URI1	1.82936e-214	0.986663	0.612	0.048	3.79116e-210
NUDT1	2.37136e-214	0.991021	0.705	0.08	4.91441e-210
YTHDF2	4.32122e-214	0.929449	0.776	0.112	8.95529e-210
MMADHC	4.37296e-214	0.944484	0.65	0.061	9.06251e-210
HSD17B10	2.63248e-213	1.04389	0.579	0.039	5.45555e-209
RPL36AL	9.0769e-213	1.39152	0.998	0.246	1.8811e-208
UQCRQ	1.3608e-212	1.02084	0.789	0.114	2.82011e-208
EMC7	1.36467e-212	0.951223	0.551	0.028	2.82815e-208
NDUFA11	1.36526e-212	1.00817	0.926	0.184	2.82936e-208
MDH1	1.36847e-212	1.00664	0.553	0.031	2.83601e-208
MRPS15	3.69813e-212	0.968597	0.67	0.072	7.66401e-208
ATP5F1A	4.62223e-212	0.941784	0.95	0.182	9.5791e-208
UBE2D2	6.92494e-212	0.866778	0.843	0.137	1.43512e-207
PA2G4	7.40571e-212	0.954758	0.809	0.125	1.53476e-207
RFLNB	1.36972e-211	1.04242	0.775	0.112	2.8386e-207
CSNK2B	2.3912e-211	1.0081	0.77	0.112	4.95551e-207
HDGF	2.86873e-211	0.952301	0.776	0.114	5.94516e-207
RPL17	4.13753e-211	1.21445	1	0.436	8.57462e-207
FOXC1	5.52883e-211	1.09317	0.447	0	1.1458e-206
RNF125	5.82383e-211	1.01948	0.519	0.019	1.20693e-206
FGFR1OP2	7.07144e-211	0.936671	0.634	0.057	1.46548e-206
DCP1A	1.1422e-210	0.835229	0.77	0.102	2.36709e-206
CRK	1.44344e-210	0.932203	0.574	0.036	2.99139e-206
AGO2	1.47116e-210	0.966051	0.579	0.038	3.04883e-206
GINM1	1.88196e-210	0.96183	0.629	0.056	3.90017e-206
DRAP1	1.89122e-210	0.991349	0.862	0.151	3.91936e-206
NUTF2	2.11174e-210	0.965695	0.785	0.118	4.37638e-206
MRPS24	2.88319e-210	0.994937	0.799	0.123	5.97513e-206
HCST	5.8725e-210	1.20188	0.972	0.19	1.21702e-205
PSMA1	9.23348e-210	0.968957	0.947	0.191	1.91355e-205
LUZP1	1.1168e-209	0.746667	0.858	0.131	2.31446e-205
RPL22L1	1.58804e-209	1.15619	0.958	0.204	3.29104e-205
SPNS2	4.55721e-209	1.01684	0.444	0	9.44436e-205
EIF2AK2	6.12944e-209	0.955912	0.591	0.045	1.27027e-204
CCDC85B	1.84464e-208	0.963318	0.757	0.108	3.82283e-204
FIBP	2.48317e-208	0.979923	0.648	0.066	5.14612e-204
PAFAH1B3	3.41817e-208	1.01171	0.489	0.013	7.08381e-204
PSMB2	4.72619e-208	0.962066	0.653	0.07	9.79457e-204
HMGA1	4.76986e-208	1.10741	0.971	0.203	9.88505e-204
TBCB	4.99598e-208	0.932417	0.64	0.064	1.03537e-203
RPL4	8.56274e-208	1.49424	1	0.275	1.77454e-203
CST7	8.5847e-208	1.11959	0.441	0	1.77909e-203
PMF1	1.65208e-207	0.960881	0.587	0.045	3.42377e-203
MARCKSL1	2.17488e-207	0.993517	0.748	0.105	4.50721e-203
TPRKB	4.01935e-207	0.995422	0.492	0.015	8.32971e-203
GAMT	5.04356e-207	0.852528	0.66	0.068	1.04523e-202
HNRNPAB	5.15497e-207	0.898907	0.783	0.119	1.06832e-202
HES1	9.05753e-207	1.4166	0.472	0.009	1.87708e-202
TRG-AS1	1.81341e-206	0.993624	0.52	0.021	3.75811e-202
ZNF511	1.93873e-206	0.901596	0.664	0.071	4.01783e-202
MATK	3.89922e-206	0.926612	0.563	0.035	8.08074e-202
ABHD14B	4.59916e-206	0.887675	0.751	0.103	9.53129e-202
VDAC3	6.11233e-206	0.928301	0.621	0.056	1.26672e-201
SNRPB2	8.40824e-206	0.945001	0.709	0.093	1.74252e-201
ZNF277	8.85126e-206	0.996497	0.502	0.018	1.83434e-201
IDS	1.34004e-205	1.12591	0.965	0.208	2.77709e-201
YBX1	1.38517e-205	1.39508	1	0.289	2.87062e-201
AC020916.1	2.10054e-205	-1.36807	0.992	0.929	4.35315e-201
CANX	4.27984e-205	0.955158	0.868	0.16	8.86955e-201
SLC25A6	4.29881e-205	1.34104	0.999	0.245	8.90886e-201
MRPL4	4.30856e-205	0.906788	0.688	0.083	8.92905e-201
UCHL3	4.37288e-205	1.00177	0.531	0.027	9.06236e-201
SERTAD1	4.84917e-205	1.00905	0.901	0.175	1.00494e-200
UQCRC2	6.29489e-205	0.873465	0.778	0.117	1.30455e-200
MRPL54	8.5729e-205	0.873408	0.768	0.112	1.77665e-200
PDLIM1	7.02353e-204	0.8452	0.682	0.077	1.45556e-199
LSM12	8.12769e-204	0.948454	0.639	0.066	1.68438e-199
TCEAL4	8.51362e-204	0.906573	0.604	0.051	1.76436e-199
COPS3	1.85751e-203	0.905481	0.712	0.09	3.8495e-199
TRAPPC2L	2.02667e-203	0.977938	0.593	0.051	4.20007e-199
EPS15	3.95896e-203	0.839052	0.705	0.085	8.20455e-199
RPS27A	9.7836e-203	1.25336	1	0.394	2.02755e-198
NDUFA7	1.27583e-202	1.01509	0.581	0.048	2.64402e-198
NDUFA12	1.36719e-202	0.977242	0.603	0.054	2.83336e-198
HNRNPA0	1.48584e-202	1.00168	0.949	0.205	3.07926e-198
CHMP2B	1.7327e-202	0.982644	0.561	0.04	3.59086e-198
LYSMD2	2.17113e-202	0.911911	0.559	0.038	4.49945e-198
EIF2S2	3.73662e-202	0.955454	0.654	0.075	7.74376e-198
MRPL45	4.07e-202	1.00062	0.504	0.022	8.43468e-198
NIT2	4.1807e-202	1.00696	0.551	0.036	8.66407e-198
ZNF428	6.96059e-202	0.885146	0.732	0.1	1.44251e-197
ADGRE2	8.14208e-202	0.941708	0.599	0.05	1.68736e-197
SARNP	9.56542e-202	0.844162	0.787	0.12	1.98234e-197
CCDC59	4.50171e-201	0.873422	0.873	0.156	9.32934e-197
LETMD1	1.66715e-200	0.884055	0.6	0.051	3.45501e-196
UBE2G1	2.33398e-200	0.956692	0.573	0.045	4.83695e-196
C4orf3	4.27989e-200	1.04523	0.594	0.056	8.86964e-196
ARHGDIB	6.24338e-200	1.07785	0.964	0.206	1.29388e-195
ALYREF	6.70057e-200	0.904842	0.791	0.127	1.38863e-195
IER3IP1	9.85145e-200	0.977786	0.565	0.044	2.04161e-195
RPS13	9.97258e-200	1.25161	1	0.396	2.06672e-195
TXNL1	1.07154e-199	0.839622	0.836	0.144	2.22067e-195
MAZ	1.82195e-199	0.978879	0.888	0.17	3.77581e-195
GNB1	3.70483e-199	0.896938	0.772	0.12	7.6779e-195
BRI3	4.57761e-199	0.936072	0.928	0.191	9.48664e-195
FOS	6.59812e-199	-1.06271	0.999	0.915	1.36739e-194
KCMF1	6.6977e-199	0.881447	0.627	0.063	1.38803e-194
ITGAE	7.06542e-199	0.944058	0.594	0.053	1.46424e-194
ORAI1	1.27868e-198	0.842394	0.599	0.051	2.64994e-194
ABT1	1.28018e-198	0.878937	0.539	0.033	2.65305e-194
SLC38A2	2.6924e-198	-2.09537	0.831	0.85	5.57974e-194
PPP1CB	3.02023e-198	1.07107	0.977	0.223	6.25912e-194
TM7SF3	5.00886e-198	0.853796	0.64	0.066	1.03804e-193
MRPL22	7.67396e-198	0.90922	0.571	0.045	1.59035e-193
AL118516.1	8.6438e-198	0.901863	0.622	0.062	1.79134e-193
KLF3	1.20263e-197	0.973435	0.481	0.016	2.49233e-193
CUEDC2	4.65594e-197	0.947979	0.597	0.056	9.64897e-193
ELOC	5.65817e-197	0.882853	0.8	0.132	1.1726e-192
NRBF2	8.33548e-197	0.937476	0.488	0.018	1.72745e-192
SIK3	1.02493e-196	0.864274	0.731	0.1	2.12407e-192
EMP1	1.18218e-196	0.994045	0.801	0.136	2.44995e-192
PIGP	1.2637e-196	0.951533	0.465	0.013	2.61888e-192
METRNL	1.32614e-196	0.887292	0.927	0.176	2.74828e-192
PSMD9	1.62296e-196	0.923585	0.612	0.061	3.36343e-192
CDC123	2.07949e-196	0.909485	0.567	0.043	4.30954e-192
RAB22A	4.29924e-196	0.896643	0.565	0.043	8.90974e-192
KIF9	4.5742e-196	0.92943	0.505	0.024	9.47958e-192
CCT2	5.23011e-196	0.891434	0.896	0.175	1.08389e-191
POLR2I	5.3096e-196	0.9501	0.563	0.045	1.10036e-191
QPRT	8.18724e-196	0.953741	0.455	0.009	1.69672e-191
MZT1	1.24782e-195	0.969173	0.505	0.025	2.58599e-191
SEC61G	1.61561e-195	0.941167	0.853	0.155	3.34819e-191
POLR2F	1.69352e-195	0.971843	0.526	0.033	3.50965e-191
COX8A	1.97387e-195	1.0189	0.934	0.183	4.09064e-191
ATP6AP2	3.14596e-195	0.807335	0.836	0.145	6.51968e-191
NOB1	3.653e-195	0.973409	0.488	0.02	7.57048e-191
MLC1	3.81238e-195	0.968628	0.417	0	7.90077e-191
TXNDC5	8.6214e-195	0.980752	0.471	0.016	1.7867e-190
POLR2J	9.20432e-195	0.898239	0.664	0.081	1.9075e-190
EEF1G	9.70766e-195	1.40138	1	0.309	2.01182e-190
TRAPPC4	1.47957e-194	0.837963	0.618	0.062	3.06625e-190
PPP1CC	1.75961e-194	0.861096	0.694	0.091	3.64661e-190
CKS2	8.73037e-194	0.949361	0.757	0.116	1.80928e-189
ETV3	1.43322e-193	0.983893	0.667	0.081	2.9702e-189
PRDX4	4.02548e-193	0.984911	0.433	0.005	8.34241e-189
PCNP	4.96741e-193	0.861411	0.7	0.094	1.02945e-188
PTS	5.07054e-193	0.883415	0.606	0.061	1.05082e-188
RPL19	1.34085e-192	1.17573	1	0.394	2.77879e-188
SDHD	1.48676e-192	0.935777	0.514	0.029	3.08117e-188
FSCN1	1.82166e-192	0.768158	0.744	0.107	3.77521e-188
ARPC1B	2.50879e-192	1.06956	0.977	0.223	5.19922e-188
BLOC1S2	2.78288e-192	0.793898	0.754	0.116	5.76725e-188
MT-ATP8	4.22136e-192	-2.55865	0.575	0.824	8.74835e-188
MRPL3	5.54026e-192	0.954201	0.464	0.016	1.14816e-187
GNB4	6.49613e-192	0.873872	0.512	0.027	1.34626e-187
UBXN1	6.72989e-192	0.875489	0.913	0.187	1.3947e-187
ZNF430	8.0125e-192	0.86456	0.538	0.038	1.66051e-187
LITAF	8.04144e-192	0.834593	0.825	0.147	1.66651e-187
XRCC5	1.22677e-191	0.858868	0.632	0.069	2.54235e-187
ERP44	1.57635e-191	0.921675	0.567	0.049	3.26682e-187
AP3S1	1.93862e-191	0.918423	0.574	0.05	4.01759e-187
CIRBP	2.01656e-191	1.07264	0.981	0.241	4.17912e-187
LSM1	5.45963e-191	0.921653	0.5	0.026	1.13145e-186
CHCHD2	6.41031e-191	1.28904	1	0.275	1.32847e-186
NIFK	8.32299e-191	0.880741	0.577	0.049	1.72486e-186
PAICS	1.0682e-190	0.933418	0.496	0.025	2.21374e-186
XRCC6	1.83843e-190	0.884281	0.769	0.128	3.80997e-186
OCIAD1	1.86557e-190	0.828833	0.754	0.12	3.86621e-186
RPS3A	2.12056e-190	1.15711	1	0.45	4.39465e-186
ATP2B1	2.38344e-190	0.869519	0.885	0.169	4.93943e-186
RHOH	2.47194e-190	1.00745	0.443	0.009	5.12285e-186
CTSS	3.59229e-190	0.876526	0.732	0.113	7.44466e-186
TUFM	4.53366e-190	0.898691	0.934	0.206	9.39556e-186
ARL5A	6.19263e-190	0.914757	0.55	0.043	1.28336e-185
CD44	6.23262e-190	-1.28062	0.998	0.884	1.29165e-185
TFPI	1.62952e-189	0.988891	0.407	0	3.37703e-185
PSMD8	2.14996e-189	0.843969	0.883	0.175	4.45557e-185
ZNF593	6.32683e-189	0.866863	0.679	0.092	1.31117e-184
WDR74	1.0834e-188	-2.9543	0.293	0.761	2.24524e-184
BFAR	1.51987e-188	0.92875	0.494	0.025	3.14977e-184
CYTIP	1.5996e-188	0.822714	0.666	0.081	3.31501e-184
MRFAP1	2.64038e-188	0.767466	0.798	0.136	5.47193e-184
NAA20	3.38498e-188	0.888871	0.461	0.016	7.01503e-184
SUPT4H1	5.18328e-188	0.880079	0.58	0.055	1.07418e-183
CMTM3	6.26151e-188	0.901171	0.565	0.05	1.29764e-183
BTG3	6.47053e-188	0.897404	0.617	0.066	1.34095e-183
MTRF1L	7.04335e-188	0.805081	0.678	0.089	1.45966e-183
SCP2	7.46261e-188	0.932652	0.642	0.078	1.54655e-183
EMC3	7.70496e-188	0.790288	0.645	0.076	1.59677e-183
LMAN1	8.11126e-188	0.875913	0.563	0.048	1.68098e-183
SUCLG1	9.53064e-188	0.821844	0.618	0.066	1.97513e-183
AC002454.1	1.20431e-187	0.992475	0.403	0	2.49581e-183
CCNH	1.90285e-187	0.876648	0.685	0.095	3.94346e-183
RALA	2.28183e-187	0.905682	0.48	0.021	4.72887e-183
SKIL	2.58534e-187	0.856377	0.766	0.125	5.35786e-183
LAMTOR5	2.88979e-187	0.766228	0.824	0.15	5.98881e-183
RPS6	2.9622e-187	1.18224	1	0.411	6.13886e-183
JUP	6.44043e-187	0.875184	0.461	0.015	1.33471e-182
SNRPG	7.58026e-187	0.922557	0.703	0.103	1.57093e-182
PGK1	1.00601e-186	0.911691	0.957	0.217	2.08485e-182
ANXA7	1.25215e-186	0.759349	0.776	0.128	2.59496e-182
UBL5	1.29979e-186	0.938143	0.895	0.175	2.69368e-182
HADHB	1.435e-186	0.817144	0.645	0.078	2.97389e-182
MAPRE2	1.71048e-186	0.962559	0.44	0.011	3.54481e-182
RPS7	3.18232e-186	1.12223	1	0.442	6.59504e-182
BAX	3.81952e-186	0.815104	0.83	0.152	7.91557e-182
PSMA3	5.07105e-186	0.767631	0.773	0.128	1.05092e-181
ZKSCAN1	5.57328e-186	0.772944	0.598	0.058	1.15501e-181
EIF2A	6.30651e-186	0.752845	0.804	0.139	1.30696e-181
CCNC	7.76094e-186	0.861189	0.577	0.054	1.60838e-181
TMEM179B	9.64069e-186	0.957546	0.501	0.032	1.99794e-181
RSL1D1	1.00052e-185	0.921857	0.969	0.221	2.07347e-181
SUMO3	1.15809e-185	0.846266	0.699	0.101	2.40002e-181
TMCO3	1.19821e-185	0.750877	0.707	0.099	2.48317e-181
ODC1	1.23205e-185	0.873936	0.545	0.042	2.55329e-181
IFT20	1.35925e-185	0.82384	0.664	0.087	2.8169e-181
PRXL2C	1.60498e-185	0.828835	0.786	0.137	3.32616e-181
NFE2L2	2.60297e-185	0.822314	0.609	0.064	5.39439e-181
ATP5MC3	2.97091e-185	1.08103	0.98	0.241	6.15691e-181
RPL18	4.28824e-185	1.2925	1	0.333	8.88695e-181
RGS10	4.52101e-185	0.980134	0.481	0.025	9.36934e-181
DUSP2	7.33631e-185	1.05129	0.648	0.082	1.52038e-180
RPS4X	1.0595e-184	1.17935	1	0.443	2.1957e-180
ARF5	1.15919e-184	0.944943	0.656	0.088	2.4023e-180
CMPK1	1.26347e-184	0.917365	0.623	0.073	2.61842e-180
DUSP14	1.53478e-184	0.992711	0.397	0	3.18067e-180
KPNA2	4.71229e-184	0.80698	0.842	0.157	9.76575e-180
TRIAP1	4.77686e-184	0.896537	0.522	0.038	9.89957e-180
MRPL21	9.16716e-184	0.842414	0.514	0.035	1.8998e-179
EIF4A3	1.3105e-183	0.819006	0.605	0.065	2.71588e-179
AC093673.1	1.59347e-183	0.939681	0.567	0.056	3.30231e-179
ETFB	1.73522e-183	0.819311	0.714	0.109	3.59608e-179
LAGE3	1.80133e-183	0.911275	0.519	0.037	3.73308e-179
UBE2H	2.04093e-183	0.696297	0.776	0.127	4.22963e-179
KRAS	4.34366e-183	0.767227	0.842	0.156	9.00179e-179
ENSA	5.39443e-183	0.784331	0.854	0.167	1.11794e-178
SS18L2	6.33831e-183	0.888228	0.617	0.071	1.31355e-178
AREG	8.73992e-183	1.18307	0.437	0.012	1.81126e-178
C12orf10	2.17051e-182	0.934051	0.496	0.031	4.49817e-178
MAPK1IP1L	2.33011e-182	0.78474	0.803	0.144	4.82891e-178
FAM204A	3.04091e-182	0.762796	0.7	0.101	6.30198e-178
RPL5	3.09124e-182	1.11219	1	0.466	6.40628e-178
FTL	3.09461e-182	1.26455	1	0.328	6.41326e-178
CCND2	3.61952e-182	0.891906	0.478	0.024	7.5011e-178
ARL6IP4	3.85494e-182	0.864844	0.977	0.227	7.98898e-178
RPL3	8.14266e-182	1.16095	1	0.438	1.68749e-177
CHCHD10	1.20955e-181	0.93864	0.598	0.066	2.50667e-177
RPS20	2.08469e-181	1.28646	0.998	0.264	4.32031e-177
PSMB8	2.3991e-181	0.84075	0.61	0.069	4.97189e-177
CPSF6	3.37757e-181	0.703264	0.85	0.162	6.99968e-177
MRPS35	9.57044e-181	0.870444	0.469	0.022	1.98338e-176
LAMTOR4	1.26049e-180	0.893485	0.939	0.205	2.61225e-176
TRAPPC1	1.46114e-180	0.907105	0.659	0.09	3.02806e-176
SNF8	1.68034e-180	0.828702	0.63	0.077	3.48234e-176
BUD23	1.91051e-180	0.745364	0.684	0.095	3.95934e-176
MSRB3	1.91822e-180	0.778073	0.62	0.073	3.97533e-176
FAM49B	2.0672e-180	0.755405	0.817	0.151	4.28406e-176
RELL1	2.34326e-180	0.937151	0.481	0.026	4.85618e-176
TIMP1	2.42916e-180	0.960629	0.844	0.173	5.03419e-176
CFAP298	2.54699e-180	0.895861	0.449	0.017	5.27838e-176
RASGEF1B	2.79619e-180	0.777876	0.713	0.106	5.79482e-176
ADRM1	3.46874e-180	0.756616	0.707	0.105	7.18862e-176
PSMD11	4.4835e-180	0.676843	0.751	0.121	9.29161e-176
ERCC1	6.09769e-180	0.854501	0.611	0.072	1.26369e-175
KRT18	1.35153e-179	1.13426	0.388	0	2.8009e-175
CYBA	1.46888e-179	-0.987137	1	0.878	3.04411e-175
NIP7	2.14601e-179	0.830668	0.506	0.033	4.4474e-175
RPL9	2.30726e-179	1.18757	1	0.382	4.78157e-175
CNOT7	2.4775e-179	0.900447	0.519	0.041	5.13437e-175
CD302	2.81435e-179	0.928543	0.64	0.086	5.83247e-175
PRKRA	6.48685e-179	0.759903	0.563	0.053	1.34433e-174
RAP1A	7.04018e-179	0.828828	0.554	0.05	1.45901e-174
CCT5	1.80331e-178	0.844569	0.542	0.047	3.73717e-174
CHCHD5	2.27404e-178	0.882739	0.592	0.068	4.71271e-174
PDZD8	2.31414e-178	0.838495	0.553	0.05	4.79583e-174
VBP1	2.97746e-178	0.886505	0.432	0.013	6.1705e-174
PRKAR1A	3.39092e-178	0.812857	0.699	0.107	7.02734e-174
CLPP	3.45669e-178	0.856916	0.53	0.045	7.16363e-174
NDUFB1	3.86113e-178	0.898615	0.708	0.109	8.0018e-174
CHMP2A	7.98307e-178	0.766477	0.798	0.149	1.65441e-173
C20orf27	8.62955e-178	0.880748	0.488	0.031	1.78839e-173
TMEM18	9.76327e-178	0.906626	0.504	0.036	2.02334e-173
NDUFA10	1.01811e-177	0.623128	0.801	0.14	2.10992e-173
CD47	2.12488e-177	0.724702	0.872	0.172	4.40361e-173
AKR1A1	3.45463e-177	0.773534	0.702	0.107	7.15938e-173
SLC38A1	5.9487e-177	0.871028	0.461	0.021	1.23281e-172
ADSL	7.03866e-177	0.77873	0.504	0.035	1.45869e-172
RPS23	7.25984e-177	1.09347	1	0.428	1.50453e-172
SNRPA	8.62792e-177	0.851442	0.627	0.08	1.78805e-172
TMEM41B	1.25767e-176	0.786672	0.639	0.082	2.60641e-172
CLTB	2.23255e-176	0.892018	0.573	0.062	4.62674e-172
LYRM4	2.73217e-176	0.852687	0.496	0.035	5.66215e-172
GLO1	8.26694e-176	0.929097	0.475	0.029	1.71324e-171
FAH	8.99496e-176	0.834214	0.468	0.025	1.86411e-171
BCL11A	1.71283e-175	0.808141	0.538	0.047	3.54968e-171
PDCD5	3.88911e-175	0.911281	0.457	0.024	8.05978e-171
RPL27	6.17745e-175	1.31768	1	0.282	1.28021e-170
CUL5	6.50271e-175	0.698413	0.65	0.086	1.34762e-170
COX14	6.74359e-175	0.908661	0.562	0.06	1.39754e-170
DNAJC3	9.72176e-175	0.782368	0.689	0.106	2.01474e-170
KDSR	1.40539e-174	0.887403	0.434	0.016	2.91252e-170
FUNDC2	1.43723e-174	0.889998	0.501	0.037	2.97852e-170
RPL35A	1.8215e-174	1.1331	1	0.424	3.77488e-170
CCNY	1.93304e-174	0.863876	0.499	0.035	4.00603e-170
KRT10	3.70859e-174	0.889203	0.609	0.077	7.68569e-170
RNF114	4.96762e-174	0.68485	0.787	0.141	1.02949e-169
NCF1	5.51506e-174	-3.13256	0.033	0.628	1.14294e-169
NDUFA6	5.7855e-174	0.855732	0.537	0.05	1.19899e-169
SSNA1	6.15865e-174	0.89185	0.536	0.049	1.27632e-169
DDIT4	8.09392e-174	0.964103	0.682	0.108	1.67738e-169
RELB	9.44107e-174	0.739486	0.651	0.088	1.95657e-169
RAC2	9.81136e-174	0.869777	0.868	0.173	2.03331e-169
RASL10A	1.86638e-173	0.990766	0.376	0	3.86789e-169
CRNDE	2.52374e-173	0.900819	0.478	0.029	5.2302e-169
PMPCB	2.95051e-173	0.667564	0.638	0.082	6.11465e-169
SRP19	3.21624e-173	0.833529	0.544	0.052	6.66533e-169
LYRM1	7.67732e-173	0.755552	0.525	0.043	1.59105e-168
ATG101	1.08612e-172	0.81011	0.547	0.053	2.25087e-168
ARMC10	1.63231e-172	0.846569	0.45	0.022	3.3828e-168
GABARAP	1.92047e-172	0.96541	0.981	0.238	3.97999e-168
TAF12	3.04253e-172	0.864046	0.45	0.023	6.30535e-168
VKORC1	3.87817e-172	0.927405	0.499	0.039	8.03712e-168
PRDX3	7.36192e-172	0.90317	0.456	0.025	1.52568e-167
GALNT1	8.15968e-172	0.817713	0.483	0.032	1.69101e-167
H2AFX	1.09603e-171	0.804635	0.611	0.077	2.27142e-167
MARCH5	1.22621e-171	0.813728	0.53	0.048	2.54119e-167
RPS25	2.19477e-171	1.25399	1	0.35	4.54843e-167
DENR	2.3132e-171	0.820119	0.59	0.07	4.79388e-167
CIB1	3.18436e-171	0.70305	0.769	0.136	6.59927e-167
C11orf58	3.53354e-171	0.684641	0.833	0.164	7.3229e-167
RPL39	6.88562e-171	0.920577	1	0.406	1.42698e-166
NDUFB9	9.71252e-171	0.777987	0.768	0.14	2.01282e-166
PSMB5	9.92803e-171	0.843999	0.434	0.018	2.05748e-166
BANF1	1.13929e-170	0.932745	0.559	0.062	2.36106e-166
SMYD3	1.96221e-170	0.860787	0.514	0.045	4.06647e-166
RPL7A	2.95415e-170	1.15022	1	0.421	6.12218e-166
CPNE1	3.22257e-170	0.780015	0.676	0.105	6.67845e-166
SOCS3	4.36631e-170	0.904145	0.548	0.056	9.04873e-166
RALY	9.82296e-170	0.700062	0.757	0.137	2.03571e-165
RPS14	1.37018e-169	1.15146	1	0.402	2.83957e-165
DARS	3.8303e-169	0.692678	0.658	0.094	7.93791e-165
CPXM1	4.05678e-169	0.77967	0.439	0.019	8.40727e-165
SELENOT	4.33902e-169	0.700831	0.737	0.126	8.99219e-165
FAM136A	5.39046e-169	0.775587	0.579	0.067	1.11712e-164
NUDT5	6.07304e-169	0.871554	0.469	0.031	1.25858e-164
TMEM170A	1.38921e-168	0.785462	0.587	0.071	2.87899e-164
RPLP0	1.4178e-168	1.24788	1	0.366	2.93825e-164
TMED10	1.43553e-168	0.705333	0.715	0.12	2.97498e-164
RBM27	1.86329e-168	0.718923	0.596	0.072	3.86149e-164
NT5C3A	3.06853e-168	0.805616	0.463	0.027	6.35922e-164
PSMA4	3.22785e-168	0.712273	0.752	0.136	6.68939e-164
SPAG7	9.73015e-168	0.68666	0.577	0.065	2.01648e-163
TSPO	1.11864e-167	0.986104	0.98	0.22	2.31827e-163
HIST1H4C	1.15364e-167	0.69113	0.656	0.095	2.39081e-163
MIR4435-2HG	1.46427e-167	0.836416	0.467	0.028	3.03454e-163
ATP5MC2	2.95388e-167	1.29152	1	0.285	6.12161e-163
MCTS1	9.2661e-167	0.809978	0.531	0.053	1.92031e-162
RNF181	1.04002e-166	0.859467	0.596	0.077	2.15534e-162
RAB8A	1.04402e-166	0.644791	0.609	0.078	2.16362e-162
DYNLL2	1.21094e-166	0.724059	0.612	0.08	2.50955e-162
PPP1R7	1.75843e-166	0.863923	0.493	0.04	3.64417e-162
C18orf32	2.17468e-166	0.832182	0.529	0.051	4.50681e-162
TMCO1	2.85534e-166	0.794836	0.537	0.054	5.9174e-162
IGFBP7	5.22123e-166	0.872029	0.651	0.101	1.08205e-161
PKN1	5.91639e-166	0.672242	0.763	0.139	1.22611e-161
NR4A1	5.95544e-166	0.887064	0.694	0.113	1.23421e-161
COX6B1	6.90493e-166	0.978482	0.97	0.229	1.43098e-161
UTP11	6.92434e-166	0.730958	0.538	0.055	1.435e-161
MRPS27	7.96411e-166	0.818821	0.486	0.038	1.65048e-161
CNST	1.18403e-165	0.691206	0.639	0.091	2.45379e-161
AKR1C3	1.5346e-165	0.862641	0.36	0	3.18031e-161
DANCR	2.07924e-165	0.874694	0.449	0.026	4.30902e-161
MCL1	2.6535e-165	-0.845436	1	0.887	5.49912e-161
MARCH7	3.08991e-165	0.75109	0.5	0.04	6.40354e-161
SSU72	3.28072e-165	0.698625	0.744	0.135	6.79896e-161
TMEM141	3.55219e-165	0.869581	0.445	0.026	7.36156e-161
MRPL9	4.38828e-165	0.757444	0.533	0.054	9.09428e-161
TIMM17A	4.94696e-165	0.702696	0.712	0.12	1.02521e-160
METTL26	4.97373e-165	0.702183	0.799	0.152	1.03076e-160
CD33	5.55823e-165	0.639908	0.632	0.086	1.15189e-160
TCEAL8	5.94026e-165	0.871091	0.437	0.023	1.23106e-160
DNAJC19	6.08178e-165	0.870289	0.403	0.013	1.26039e-160
MPST	6.96041e-165	0.878692	0.617	0.087	1.44248e-160
TMOD3	8.27328e-165	0.725337	0.545	0.057	1.71456e-160
SAMD4B	1.15805e-164	0.637236	0.767	0.14	2.39994e-160
GLRX3	1.50217e-164	0.769179	0.511	0.046	3.11309e-160
CREM	2.12265e-164	1.0018	0.433	0.022	4.39897e-160
AC058791.1	2.18931e-164	0.963898	0.507	0.048	4.53712e-160
RBM7	2.19292e-164	0.645439	0.697	0.115	4.54461e-160
CEP170	3.25416e-164	0.67868	0.684	0.107	6.74392e-160
PIN1	3.26746e-164	0.804693	0.536	0.056	6.77149e-160
PSMB4	4.99826e-164	0.739751	0.706	0.121	1.03584e-159
HACD4	5.43789e-164	0.75694	0.556	0.062	1.12695e-159
ATP1B3	5.44555e-164	0.68626	0.622	0.086	1.12854e-159
UROS	6.75008e-164	0.797388	0.481	0.037	1.39889e-159
COQ10B	1.10186e-163	0.688256	0.651	0.096	2.28349e-159
MFF	1.41208e-163	0.722006	0.523	0.05	2.92639e-159
COX11	1.72612e-163	0.840302	0.41	0.016	3.57722e-159
SSB	1.92577e-163	0.689728	0.876	0.188	3.99097e-159
TES	3.16678e-163	0.620688	0.789	0.153	6.56283e-159
ERGIC1	3.35766e-163	0.770283	0.487	0.04	6.95842e-159
JMJD1C	5.05485e-163	-1.33788	0.982	0.869	1.04757e-158
NSMCE1	5.70931e-163	0.825157	0.526	0.054	1.1832e-158
ZNRF1	8.72017e-163	0.760858	0.432	0.021	1.80717e-158
NCBP2AS2	1.55818e-162	0.720771	0.517	0.049	3.22917e-158
MED21	1.65e-162	0.660419	0.606	0.079	3.41945e-158
KRR1	2.23942e-162	0.653486	0.841	0.175	4.64098e-158
DBI	2.97692e-162	0.72842	0.88	0.189	6.16938e-158
ATP5MPL	4.02194e-162	0.840037	0.95	0.211	8.33507e-158
BAG1	4.25099e-162	0.70887	0.744	0.138	8.80975e-158
MCTP2	1.24454e-161	0.728288	0.53	0.053	2.57919e-157
FAU	1.43713e-161	1.1602	1	0.368	2.97831e-157
CNPY2	1.71245e-161	0.69674	0.616	0.086	3.54888e-157
COX16	2.14318e-161	0.890384	0.478	0.04	4.44153e-157
C17orf49	2.91695e-161	0.700409	0.702	0.121	6.04508e-157
GAS5	2.92998e-161	1.1988	1	0.34	6.07209e-157
MRPL42	3.16749e-161	0.735018	0.518	0.05	6.5643e-157
C9orf78	3.23633e-161	0.683968	0.678	0.109	6.70697e-157
TIMM10	3.2695e-161	0.884585	0.487	0.043	6.77571e-157
PAPOLA	3.6173e-161	0.731391	0.922	0.216	7.4965e-157
PFKFB3	4.00942e-161	0.796198	0.475	0.035	8.30913e-157
LTA4H	6.88386e-161	0.757531	0.578	0.073	1.42661e-156
TIMM9	1.3513e-160	0.860243	0.409	0.017	2.80044e-156
PHTF1	1.46076e-160	0.669716	0.579	0.071	3.02728e-156
CFP	1.60444e-160	0.792211	0.573	0.07	3.32504e-156
SPNS3	1.96428e-160	0.582399	0.76	0.138	4.07076e-156
TMED4	2.15214e-160	0.752283	0.657	0.106	4.46009e-156
ATP6V0E1	4.02891e-160	0.861007	0.469	0.037	8.3495e-156
AL121944.1	4.95252e-160	0.864352	0.524	0.053	1.02636e-155
TMEM238	5.28681e-160	0.822556	0.447	0.029	1.09564e-155
ELL2	6.53809e-160	0.83575	0.467	0.035	1.35495e-155
CXXC5	9.39939e-160	0.64472	0.709	0.118	1.94793e-155
RAB9A	9.88006e-160	0.692241	0.52	0.053	2.04754e-155
PDE4B	1.42474e-159	0.81179	0.428	0.021	2.95264e-155
REST	1.53679e-159	0.671328	0.563	0.066	3.18484e-155
HSP90AA1	1.61658e-159	-0.999294	1	0.883	3.3502e-155
KRT17	1.67176e-159	1.00789	0.348	0	3.46455e-155
SET	2.3359e-159	1.03366	0.993	0.269	4.84091e-155
DCTN6	2.97581e-159	0.70746	0.55	0.062	6.16707e-155
CSNK1D	3.44969e-159	0.563296	0.76	0.138	7.14914e-155
GTF2A2	5.98143e-159	0.843514	0.484	0.042	1.23959e-154
SPTBN1	6.06184e-159	0.774991	0.453	0.03	1.25626e-154
HSD17B12	6.20624e-159	0.740971	0.5	0.047	1.28618e-154
NUDT21	9.66124e-159	0.779353	0.482	0.041	2.00219e-154
LAMP1	1.8289e-158	0.685071	0.792	0.161	3.79021e-154
ABHD14A	2.61411e-158	0.845926	0.407	0.018	5.41749e-154
SOX4	2.64407e-158	0.63773	0.829	0.167	5.47958e-154
F11R	3.04874e-158	0.796932	0.391	0.012	6.31821e-154
TYW3	4.18297e-158	0.837738	0.449	0.031	8.66879e-154
SNHG17	7.71432e-158	0.647691	0.671	0.11	1.59872e-153
UBE2N	9.16307e-158	0.689518	0.894	0.204	1.89895e-153
LYPLA1	9.68307e-158	0.667045	0.634	0.095	2.00672e-153
ORMDL1	2.13136e-157	0.613475	0.697	0.119	4.41703e-153
MACROD1	2.7014e-157	0.770952	0.414	0.019	5.59837e-153
SLC39A3	3.60976e-157	0.834423	0.414	0.021	7.48087e-153
PPIG	3.86536e-157	0.632405	0.749	0.14	8.01058e-153
SMIM20	4.04163e-157	0.807357	0.406	0.018	8.37586e-153
RETN	4.22324e-157	0.871204	0.343	0	8.75225e-153
VAMP8	4.43068e-157	0.936996	0.965	0.233	9.18214e-153
HDDC2	5.40272e-157	0.792623	0.457	0.035	1.11966e-152
RPL34	6.02385e-157	0.975008	1	0.412	1.24838e-152
SH3GLB1	6.05651e-157	0.60248	0.779	0.154	1.25515e-152
YIPF3	6.16723e-157	0.773168	0.457	0.033	1.2781e-152
SELENOW	6.85723e-157	0.815079	0.464	0.037	1.42109e-152
SRSF11	7.21577e-157	-1.53262	0.951	0.841	1.4954e-152
MS4A4E	9.42191e-157	-3.02136	0.002	0.565	1.9526e-152
IP6K2	9.76933e-157	0.575333	0.811	0.162	2.0246e-152
SMIM19	9.92478e-157	0.786454	0.437	0.027	2.05681e-152
CAT	1.12251e-156	0.865269	0.926	0.229	2.32628e-152
PPP6C	1.56127e-156	0.741594	0.486	0.042	3.23558e-152
VPS37B	2.17975e-156	0.585471	0.734	0.132	4.51731e-152
APH1A	2.22358e-156	0.773337	0.536	0.063	4.60814e-152
NUDC	3.59359e-156	0.638566	0.641	0.1	7.44736e-152
CALM2	8.99462e-156	0.757324	0.922	0.222	1.86404e-151
SERINC3	9.65193e-156	0.678862	0.62	0.091	2.00027e-151
ACADM	1.08985e-155	0.815452	0.404	0.018	2.25861e-151
CTSA	1.14922e-155	0.637049	0.797	0.162	2.38165e-151
CAPZB	1.31553e-155	0.690533	0.733	0.14	2.72631e-151
ETFRF1	1.32129e-155	0.785973	0.414	0.021	2.73824e-151
ATOX1	1.68936e-155	0.71695	0.651	0.106	3.50103e-151
PLPP5	2.93125e-155	0.738079	0.451	0.032	6.07472e-151
ZNRD1	3.19773e-155	0.76533	0.514	0.055	6.62698e-151
WDR33	4.12192e-155	0.59121	0.567	0.07	8.54227e-151
NOA1	4.67534e-155	0.803083	0.396	0.016	9.68917e-151
COA4	8.73231e-155	0.801097	0.434	0.028	1.80968e-150
CACUL1	9.48341e-155	0.662493	0.589	0.08	1.96534e-150
SEC61B	9.78641e-155	0.871612	0.988	0.259	2.02814e-150
MAPK1	1.01567e-154	0.684977	0.543	0.064	2.10486e-150
HSBP1	1.54069e-154	0.637218	0.745	0.144	3.19292e-150
NEU1	1.56934e-154	0.677226	0.673	0.113	3.2523e-150
TNFRSF1A	1.57606e-154	0.706618	0.495	0.047	3.26623e-150
COX7B	1.756e-154	0.834242	0.945	0.232	3.63914e-150
PAFAH1B1	1.98366e-154	0.609399	0.604	0.084	4.11095e-150
KPNA4	2.06369e-154	0.627932	0.825	0.174	4.27679e-150
LRPAP1	2.10048e-154	0.645506	0.702	0.128	4.35303e-150
SDE2	2.57654e-154	0.639485	0.797	0.162	5.33962e-150
CMBL	2.63449e-154	0.802545	0.394	0.016	5.45972e-150
YIF1A	2.71166e-154	0.750422	0.429	0.027	5.61964e-150
TWISTNB	3.66503e-154	0.626427	0.773	0.152	7.59541e-150
MATN4	4.15741e-154	0.838703	0.337	0	8.61582e-150
CHD2	6.94374e-154	-1.73337	0.86	0.822	1.43902e-149
DRAM2	8.3995e-154	0.732974	0.524	0.06	1.74071e-149
DHRS7	1.06323e-153	0.810454	0.505	0.054	2.20343e-149
TMEM242	1.09376e-153	0.747253	0.467	0.039	2.2667e-149
TMEM70	1.35228e-153	0.743684	0.452	0.034	2.80247e-149
CDK6	1.49205e-153	0.670254	0.834	0.186	3.09212e-149
IDH3B	1.86894e-153	0.719651	0.561	0.073	3.87318e-149
FABP5	1.9877e-153	0.785936	0.455	0.036	4.11932e-149
CDC42SE2	2.18136e-153	0.55109	0.743	0.14	4.52065e-149
ZNF22	2.20692e-153	0.741347	0.443	0.031	4.57363e-149
EIF4A1	5.08367e-153	-0.868548	1	0.884	1.05354e-148
RPIA	5.8149e-153	0.765487	0.431	0.028	1.20508e-148
NANS	6.50375e-153	0.580465	0.762	0.151	1.34784e-148
LAMTOR2	7.22299e-153	0.855479	0.547	0.07	1.49689e-148
ARL6IP1	8.15071e-153	0.849825	0.952	0.243	1.68915e-148
PLGRKT	8.27163e-153	0.803323	0.364	0.008	1.71421e-148
GRASP	8.64869e-153	0.896111	0.414	0.021	1.79236e-148
RNASEH2C	1.09452e-152	0.722839	0.732	0.139	2.26829e-148
CDK4	1.20436e-152	0.792274	0.464	0.039	2.49592e-148
MAP2K2	1.42801e-152	0.541378	0.824	0.176	2.9594e-148
NDUFS3	1.93543e-152	0.653759	0.59	0.084	4.01099e-148
RPS17	2.66086e-152	1.08321	0.999	0.26	5.51437e-148
HAX1	2.88392e-152	0.781922	0.42	0.026	5.97664e-148
PLSCR1	4.35302e-152	0.780396	0.396	0.017	9.0212e-148
NDUFAF3	4.50764e-152	0.815812	0.538	0.067	9.34163e-148
EIF4B	8.04969e-152	0.847617	0.964	0.249	1.66822e-147
NDUFC1	9.05272e-152	0.706585	0.56	0.074	1.87609e-147
MIF	9.12025e-152	1.12675	0.999	0.313	1.89008e-147
COPS6	1.1219e-151	0.63471	0.66	0.11	2.32502e-147
TSPYL1	1.15644e-151	0.666742	0.67	0.118	2.3966e-147
STMN1	1.37776e-151	0.871624	0.413	0.023	2.85528e-147
MAPKAPK3	2.43472e-151	0.62059	0.615	0.093	5.04572e-147
DGUOK	2.99168e-151	0.793365	0.493	0.052	6.19996e-147
GOLPH3	3.34234e-151	0.683883	0.53	0.062	6.92667e-147
SAP30	3.56634e-151	0.839606	0.475	0.045	7.39088e-147
COPS5	6.51836e-151	0.703402	0.481	0.046	1.35087e-146
GMDS	7.40692e-151	0.807441	0.397	0.019	1.53501e-146
NDUFA1	7.92729e-151	0.720354	0.862	0.194	1.64285e-146
ZNHIT3	7.95304e-151	0.822847	0.38	0.014	1.64819e-146
PLEKHJ1	7.98154e-151	0.80665	0.469	0.043	1.65409e-146
SDCBP	8.59464e-151	0.685599	0.885	0.21	1.78115e-146
DEDD2	9.72404e-151	0.675208	0.62	0.095	2.01521e-146
ELP5	1.03576e-150	0.763538	0.392	0.017	2.1465e-146
ICA1	1.57091e-150	0.777964	0.33	0	3.25556e-146
XRN2	1.64012e-150	0.537519	0.751	0.149	3.39898e-146
NXT1	2.7257e-150	0.779267	0.585	0.085	5.64875e-146
EMC4	2.97959e-150	0.752611	0.438	0.033	6.17491e-146
EBP	3.32554e-150	0.67047	0.522	0.061	6.89184e-146
MRPL43	6.23265e-150	0.732009	0.385	0.015	1.29165e-145
BLOC1S1	8.33306e-150	0.629888	0.736	0.143	1.72694e-145
ZNF581	8.47718e-150	0.713809	0.462	0.039	1.75681e-145
WDR83OS	9.76705e-150	0.71481	0.926	0.226	2.02412e-145
POLR2K	1.23536e-149	0.715891	0.524	0.062	2.56017e-145
DPH5	1.64116e-149	0.806465	0.373	0.012	3.40114e-145
CMC2	1.75297e-149	0.722127	0.566	0.077	3.63285e-145
PHPT1	2.0942e-149	0.69751	0.86	0.201	4.34003e-145
DYNLRB1	2.24314e-149	0.785218	0.519	0.061	4.64868e-145
MPO	2.42715e-149	1.05175	0.328	0	5.03002e-145
NEU4	2.42715e-149	0.814673	0.328	0	5.03002e-145
PAIP1	3.01555e-149	0.65946	0.474	0.043	6.24942e-145
IRF9	3.15511e-149	0.714465	0.554	0.071	6.53866e-145
CDS2	4.39667e-149	0.659227	0.533	0.064	9.11166e-145
RPL7	4.90817e-149	1.16092	1	0.373	1.01717e-144
PSMD12	5.80202e-149	0.587246	0.836	0.184	1.20241e-144
NDUFB7	8.88508e-149	0.657186	0.768	0.161	1.84134e-144
COPS8	9.92679e-149	0.698657	0.476	0.046	2.05723e-144
PPM1G	1.0567e-148	0.660607	0.586	0.085	2.1899e-144
ZFP36	1.08636e-148	-1.19096	0.981	0.841	2.25137e-144
AKR7A2	1.23388e-148	0.761564	0.535	0.069	2.55709e-144
SMARCB1	1.25819e-148	0.750453	0.463	0.041	2.60747e-144
BNIP1	1.39414e-148	0.628486	0.496	0.051	2.88921e-144
STUB1	1.4875e-148	0.61429	0.652	0.111	3.08269e-144
TRAPPC2B	1.93614e-148	0.772307	0.371	0.012	4.01245e-144
TMEM208	2.10803e-148	0.748163	0.445	0.035	4.36868e-144
RNASEH2B	2.2475e-148	0.514503	0.697	0.128	4.65773e-144
CD59	3.23867e-148	0.773843	0.423	0.028	6.71182e-144
PNKD	6.81645e-148	0.742184	0.49	0.052	1.41264e-143
DUT	7.2698e-148	0.546664	0.812	0.172	1.50659e-143
TAF10	7.41153e-148	0.579739	0.815	0.18	1.53596e-143
TMEM248	8.28606e-148	0.680228	0.465	0.042	1.7172e-143
ISCU	8.8582e-148	0.541032	0.644	0.106	1.83577e-143
DNTTIP2	1.12623e-147	0.629193	0.85	0.192	2.33401e-143
S100Z	1.32165e-147	0.764513	0.422	0.028	2.73899e-143
BID	1.43522e-147	0.692626	0.538	0.07	2.97436e-143
OSGIN2	1.80505e-147	0.567218	0.703	0.129	3.74078e-143
CLIC1	2.19598e-147	1.17256	1	0.338	4.55095e-143
SAMHD1	2.33231e-147	-2.7499	0.061	0.584	4.83349e-143
UBE2A	2.75471e-147	0.591364	0.69	0.127	5.70887e-143
DCTN2	4.6176e-147	0.679554	0.487	0.05	9.56951e-143
IGHM	5.72469e-147	0.825692	0.323	0	1.18638e-142
EDF1	5.86437e-147	0.89608	0.986	0.279	1.21533e-142
RAB7A	6.15138e-147	0.612132	0.624	0.102	1.27481e-142
MAF1	6.89932e-147	0.659916	0.58	0.086	1.42982e-142
MRPL52	7.15685e-147	0.796453	0.545	0.075	1.48319e-142
LPCAT2	8.75067e-147	0.730747	0.458	0.041	1.81349e-142
DUSP23	9.66745e-147	0.789669	0.45	0.039	2.00348e-142
ZNF165	1.62271e-146	0.861231	0.359	0.01	3.3629e-142
RPS3	2.34873e-146	0.980629	1	0.491	4.86752e-142
EBNA1BP2	2.43369e-146	0.767013	0.368	0.013	5.04359e-142
EAPP	2.62299e-146	0.629736	0.605	0.094	5.43588e-142
NASP	2.98452e-146	0.625714	0.728	0.142	6.18512e-142
POLR2C	3.03984e-146	0.74555	0.407	0.024	6.29975e-142
RPL36A	3.15335e-146	1.06576	1	0.329	6.535e-142
SERBP1	5.64623e-146	0.699998	0.928	0.239	1.17012e-141
EEF1E1	7.89583e-146	0.758095	0.446	0.038	1.63633e-141
TRAM1	1.04513e-145	0.583482	0.774	0.161	2.16592e-141
RPL15	1.12092e-145	0.948083	1	0.502	2.323e-141
SMARCC1	1.15062e-145	0.61663	0.615	0.098	2.38454e-141
ZFAND5	1.30903e-145	-1.83977	0.84	0.801	2.71283e-141
PLAU	1.45895e-145	0.774056	0.488	0.051	3.02353e-141
PRR13	1.80745e-145	0.692921	0.72	0.143	3.74577e-141
MSRB2	1.80917e-145	0.81754	0.407	0.026	3.74933e-141
BRAF	2.49963e-145	0.577645	0.574	0.08	5.18024e-141
HMGN2	2.70721e-145	0.717264	0.91	0.228	5.61042e-141
AL035446.1	8.35214e-145	0.812147	0.368	0.014	1.7309e-140
ATP5ME	1.09262e-144	0.737512	0.915	0.212	2.26435e-140
BIN1	1.32877e-144	0.761142	0.318	0	2.75374e-140
APMAP	1.57375e-144	0.741775	0.379	0.017	3.26145e-140
PDAP1	2.44884e-144	0.747834	0.447	0.04	5.07498e-140
CENPV	3.04394e-144	0.763486	0.362	0.012	6.30826e-140
CHIC2	3.62123e-144	0.720224	0.464	0.045	7.50465e-140
TMX2	4.52001e-144	0.713363	0.396	0.022	9.36727e-140
ATF3	4.59349e-144	1.04269	0.99	0.318	9.51955e-140
CHP1	5.50669e-144	0.769963	0.598	0.098	1.14121e-139
RPS16	7.27631e-144	1.13657	1	0.376	1.50794e-139
TCEA1	7.29515e-144	0.525828	0.724	0.141	1.51185e-139
RAB34	8.4199e-144	0.674381	0.549	0.077	1.74494e-139
PLAGL1	9.02194e-144	0.569922	0.48	0.048	1.86971e-139
FXR1	1.10367e-143	0.600109	0.895	0.213	2.28724e-139
PSMF1	1.23839e-143	0.745316	0.416	0.031	2.56644e-139
OSER1	1.29795e-143	0.531407	0.727	0.143	2.68986e-139
BSDC1	1.38926e-143	0.484056	0.725	0.14	2.87911e-139
EIF2D	1.57104e-143	0.723224	0.433	0.035	3.25583e-139
CAP1	2.30287e-143	0.65927	0.684	0.135	4.77246e-139
KCNQ1OT1	2.57838e-143	0.681669	0.614	0.098	5.34343e-139
C12orf76	2.57957e-143	0.769274	0.377	0.017	5.34591e-139
LSM14A	2.81845e-143	0.678854	0.519	0.066	5.84095e-139
UBA2	3.68904e-143	0.533944	0.611	0.098	7.64516e-139
ZNF92	4.51808e-143	0.701935	0.398	0.023	9.36327e-139
CDC26	4.72448e-143	0.783661	0.41	0.028	9.79102e-139
PER2	5.96828e-143	0.673455	0.572	0.084	1.23687e-138
DERL2	6.08038e-143	0.643043	0.465	0.045	1.2601e-138
ERVK3-1	9.58422e-143	0.6553	0.458	0.043	1.98623e-138
SDHB	9.77971e-143	0.697547	0.487	0.055	2.02675e-138
DHPS	1.67144e-142	0.734963	0.427	0.033	3.46389e-138
PSMB9	2.05352e-142	0.756876	0.408	0.028	4.25572e-138
DDA1	2.65148e-142	0.70951	0.51	0.062	5.49494e-138
NMI	3.82355e-142	0.735768	0.388	0.021	7.92393e-138
TXNDC17	5.48162e-142	0.73269	0.407	0.027	1.13601e-137
SF3B4	5.67321e-142	0.709745	0.472	0.049	1.17572e-137
TSN	6.31307e-142	0.669212	0.433	0.035	1.30832e-137
HSPB11	6.75723e-142	0.750159	0.426	0.034	1.40037e-137
TMEM35B	9.27001e-142	0.741265	0.359	0.013	1.92112e-137
METTL9	1.20082e-141	0.63995	0.693	0.134	2.48857e-137
CIAO2B	1.24946e-141	0.690807	0.574	0.09	2.58939e-137
GUK1	1.27654e-141	0.612572	0.915	0.235	2.64551e-137
ANAPC15	1.28894e-141	0.782389	0.446	0.042	2.6712e-137
PLAUR	1.65295e-141	0.705296	0.907	0.224	3.42558e-137
ZPR1	3.90742e-141	0.686753	0.453	0.044	8.09773e-137
UBE2M	5.74309e-141	0.520082	0.89	0.216	1.1902e-136
TOP1	1.05043e-140	0.546048	0.842	0.19	2.17691e-136
ELMSAN1	1.12589e-140	0.528863	0.844	0.194	2.3333e-136
C1orf122	1.45695e-140	0.717818	0.467	0.049	3.01939e-136
SERPINB6	1.48351e-140	0.471911	0.728	0.147	3.07443e-136
CERS6	1.51238e-140	0.612353	0.51	0.062	3.13426e-136
AK3	2.43399e-140	0.695247	0.44	0.039	5.04419e-136
BIK	2.71641e-140	0.60837	0.472	0.049	5.62948e-136
RPS21	4.21021e-140	1.0096	1	0.36	8.72523e-136
IDI1	4.25851e-140	0.563872	0.801	0.181	8.82533e-136
HAT1	5.23811e-140	0.555996	0.667	0.123	1.08554e-135
SNHG32	8.11905e-140	0.734458	0.934	0.238	1.68259e-135
RALBP1	9.81347e-140	0.653722	0.514	0.066	2.03374e-135
HNRNPR	1.04498e-139	0.554902	0.709	0.141	2.16561e-135
ETFA	2.23301e-139	0.653058	0.443	0.041	4.62769e-135
IFI16	2.49507e-139	0.663114	0.415	0.031	5.17077e-135
SLC39A8	2.76687e-139	0.746459	0.356	0.013	5.73405e-135
TNFSF13B	3.90276e-139	0.717848	0.549	0.082	8.08807e-135
AL592183.1	5.34902e-139	0.809415	0.406	0.029	1.10853e-134
AKIRIN2	7.42874e-139	0.579226	0.849	0.2	1.53953e-134
COPS4	8.31407e-139	0.578274	0.507	0.063	1.72301e-134
ZNF433-AS1	1.41589e-138	0.530812	0.654	0.12	2.93428e-134
DHRS4L2	1.55585e-138	0.757046	0.39	0.024	3.22435e-134
HINT2	3.62872e-138	0.759538	0.394	0.026	7.52015e-134
KLF4	3.80369e-138	-2.19817	0.542	0.746	7.88278e-134
MRPS30	4.39453e-138	0.627397	0.47	0.05	9.10722e-134
B4GALT1	4.86063e-138	0.694841	0.557	0.087	1.00732e-133
GAS6-AS1	6.39616e-138	0.563848	0.511	0.064	1.32554e-133
MRPL37	6.8578e-138	0.71664	0.443	0.042	1.42121e-133
NAXE	1.00227e-137	0.761973	0.461	0.05	2.0771e-133
NDUFA2	1.17838e-137	0.644351	0.69	0.14	2.44207e-133
MPRIP	1.37414e-137	0.60978	0.433	0.039	2.84776e-133
ITPA	1.62984e-137	0.672577	0.494	0.061	3.37768e-133
KPNA6	2.36488e-137	0.55022	0.56	0.082	4.90098e-133
STAB1	2.75402e-137	0.342406	0.751	0.149	5.70744e-133
PSMG1	3.09259e-137	0.694108	0.355	0.014	6.40908e-133
MRPL15	3.92005e-137	0.710364	0.346	0.011	8.12392e-133
HTRA3	4.04164e-137	0.688948	0.385	0.023	8.3759e-133
KIAA1143	6.77479e-137	0.644338	0.408	0.031	1.40401e-132
PTAFR	7.07471e-137	-2.74304	0.028	0.535	1.46616e-132
MTDH	7.76452e-137	0.665458	0.943	0.254	1.60912e-132
CLDND1	8.32445e-137	0.530419	0.665	0.125	1.72516e-132
SQOR	1.09398e-136	0.731477	0.36	0.016	2.26716e-132
TYROBP	1.34835e-136	0.748905	0.922	0.224	2.79433e-132
LIMS1	1.69085e-136	0.589225	0.599	0.1	3.50412e-132
ACBD3	2.29688e-136	0.538777	0.559	0.083	4.76006e-132
TMA7	2.47899e-136	0.946872	0.992	0.267	5.13746e-132
TSSC4	2.70981e-136	0.599166	0.493	0.06	5.6158e-132
IFI27L2	4.24334e-136	0.738851	0.612	0.108	8.79389e-132
TNFAIP2	4.42882e-136	-2.68416	0.349	0.693	9.17828e-132
MRPL41	4.86556e-136	0.56113	0.627	0.112	1.00834e-131
RNF6	6.2203e-136	0.647437	0.419	0.034	1.2891e-131
AC092338.3	7.64647e-136	0.752883	0.337	0.01	1.58465e-131
PRNP	8.61834e-136	0.510784	0.745	0.162	1.78606e-131
RPL24	1.01738e-135	1.02071	1	0.424	2.10841e-131
NKAPD1	1.22551e-135	0.704422	0.398	0.029	2.53975e-131
RAB5IF	1.54731e-135	0.606067	0.957	0.254	3.20664e-131
NDUFS6	1.55094e-135	0.563341	0.743	0.162	3.21416e-131
CHPT1	1.86898e-135	0.684503	0.425	0.037	3.87327e-131
GPSM1	1.9355e-135	0.653999	0.355	0.014	4.01114e-131
MCFD2	2.00078e-135	0.653434	0.489	0.06	4.14643e-131
ST3GAL4	2.11378e-135	0.652378	0.444	0.043	4.38059e-131
RPL18A	2.2779e-135	-0.644188	1	0.918	4.72071e-131
TAX1BP1	3.38742e-135	0.477878	0.695	0.137	7.0201e-131
PSMD13	8.14974e-135	0.603375	0.533	0.077	1.68895e-130
RCC2	8.36531e-135	0.512341	0.663	0.125	1.73363e-130
USE1	1.01782e-134	0.555945	0.53	0.074	2.10933e-130
MMP2	1.26053e-134	0.734069	0.298	0	2.61233e-130
CDC42EP3	1.91945e-134	-2.37153	0.409	0.704	3.97788e-130
LAMTOR3	1.96556e-134	0.579651	0.553	0.084	4.07343e-130
SAR1A	2.51568e-134	0.531936	0.76	0.167	5.2135e-130
ECSIT	3.27085e-134	0.665346	0.392	0.028	6.7785e-130
PDCD7	4.41537e-134	0.673621	0.431	0.04	9.15041e-130
MAP3K8	4.78416e-134	0.554061	0.819	0.196	9.91469e-130
PSMD4	5.77784e-134	0.678819	0.536	0.079	1.1974e-129
ANGPT1	6.37007e-134	0.751143	0.336	0.011	1.32013e-129
M6PR	1.1585e-133	0.526653	0.638	0.116	2.40087e-129
BZW2	1.16714e-133	0.547718	0.751	0.168	2.41879e-129
ZDHHC24	1.35239e-133	0.633795	0.434	0.042	2.8027e-129
SLC27A5	1.84576e-133	0.704797	0.295	0	3.82515e-129
MRPL57	3.27587e-133	0.529601	0.791	0.182	6.78891e-129
THUMPD3-AS1	3.75741e-133	0.541514	0.843	0.206	7.78686e-129
ARIH1	3.84126e-133	0.433486	0.755	0.162	7.96062e-129
MBOAT7	4.68633e-133	0.470996	0.762	0.171	9.71195e-129
DCTPP1	4.95225e-133	0.74236	0.347	0.016	1.0263e-128
MFNG	5.84257e-133	0.71126	0.44	0.046	1.21081e-128
IFI6	6.11655e-133	0.80067	0.367	0.021	1.26759e-128
NFU1	6.65383e-133	0.685419	0.355	0.017	1.37894e-128
BNIP3L	6.72586e-133	0.501492	0.665	0.129	1.39387e-128
PEF1	1.00587e-132	0.708493	0.384	0.026	2.08456e-128
MPLKIP	1.34769e-132	0.686632	0.408	0.034	2.79296e-128
ATP5IF1	2.69579e-132	0.607992	0.816	0.192	5.58676e-128
SEC11C	2.91386e-132	0.688708	0.379	0.025	6.03868e-128
DENND6B	3.28809e-132	0.600741	0.51	0.069	6.81423e-128
RBM17	3.54348e-132	0.501561	0.702	0.144	7.34351e-128
ARL2BP	3.55867e-132	0.682329	0.434	0.043	7.37499e-128
NIPSNAP2	3.85957e-132	0.609302	0.465	0.053	7.99858e-128
SDHC	5.02834e-132	0.673535	0.432	0.043	1.04207e-127
HDAC1	6.84372e-132	0.683999	0.42	0.039	1.41829e-127
TESC	1.01078e-131	0.672789	0.519	0.076	2.09474e-127
PFDN1	1.24086e-131	0.590588	0.495	0.065	2.57156e-127
NUCB1	1.30874e-131	0.657125	0.543	0.083	2.71224e-127
CSNK2A2	1.63095e-131	0.668618	0.408	0.035	3.37999e-127
TPST2	2.00843e-131	0.695581	0.364	0.02	4.16228e-127
A1BG	2.08782e-131	0.740285	0.494	0.068	4.32679e-127
JAGN1	2.11e-131	0.730128	0.335	0.012	4.37276e-127
GLUD1	2.654e-131	0.609984	0.586	0.102	5.50015e-127
C22orf39	2.86795e-131	0.569666	0.492	0.064	5.94354e-127
GET3	4.04744e-131	0.606992	0.435	0.043	8.38792e-127
COPA	4.08194e-131	0.528238	0.757	0.172	8.45941e-127
QDPR	5.83498e-131	0.746568	0.356	0.019	1.20924e-126
TPGS2	6.56036e-131	0.675029	0.396	0.031	1.35957e-126
UBE2E3	7.23572e-131	0.469402	0.594	0.101	1.49953e-126
ANXA11	1.22162e-130	0.500661	0.706	0.15	2.53168e-126
GTSF1	1.72866e-130	0.73526	0.34	0.014	3.58248e-126
TAF1D	2.13362e-130	0.577045	0.963	0.263	4.42172e-126
CCNDBP1	2.28529e-130	0.628524	0.459	0.053	4.73603e-126
PSMC4	2.50645e-130	0.549227	0.486	0.062	5.19437e-126
AHCYL1	3.01729e-130	0.577487	0.501	0.068	6.25303e-126
RBM8A	3.14103e-130	0.601382	0.953	0.266	6.50947e-126
IMPAD1	3.86839e-130	0.550065	0.455	0.049	8.01685e-126
STAT5A	4.97835e-130	0.538122	0.471	0.056	1.03171e-125
RNF115	5.37735e-130	0.526853	0.525	0.077	1.1144e-125
ACBD6	5.62331e-130	0.592488	0.415	0.038	1.16538e-125
PSMA6	6.64849e-130	0.518423	0.8	0.193	1.37783e-125
RPL32	7.05893e-130	0.845719	1	0.503	1.46289e-125
CUX1	7.54712e-130	0.492192	0.599	0.104	1.56406e-125
DMAC1	1.19379e-129	0.735337	0.368	0.024	2.474e-125
NUDCD2	1.98954e-129	0.632283	0.41	0.037	4.12312e-125
ATP5F1E	2.33595e-129	0.919998	0.999	0.265	4.84102e-125
RPA3	2.48937e-129	0.732502	0.34	0.015	5.15897e-125
KPNB1	3.33975e-129	0.495393	0.739	0.161	6.9213e-125
BORCS7	5.75253e-129	0.607072	0.472	0.058	1.19215e-124
THRAP3	5.826e-129	0.57296	0.495	0.067	1.20738e-124
BCL7B	9.62956e-129	0.508952	0.583	0.1	1.99563e-124
SUSD6	9.89426e-129	0.555781	0.469	0.056	2.05049e-124
TNFRSF14	1.05386e-128	0.659785	0.339	0.014	2.18402e-124
MIF4GD	1.137e-128	0.700138	0.324	0.011	2.35632e-124
ADH5	1.19e-128	0.572725	0.44	0.047	2.46616e-124
CALM3	2.71631e-128	0.562049	0.694	0.148	5.62928e-124
DEK	4.27804e-128	0.485852	0.727	0.157	8.86581e-124
MRPS2	4.4423e-128	0.528535	0.452	0.05	9.20623e-124
RGS19	5.26415e-128	0.75453	0.419	0.043	1.09094e-123
NAE1	6.78857e-128	0.609862	0.401	0.034	1.40686e-123
SRPK1	7.10239e-128	0.56977	0.494	0.066	1.4719e-123
TCEAL9	1.17142e-127	0.700088	0.283	0	2.42765e-123
SH2D1A	1.17142e-127	0.67957	0.283	0	2.42765e-123
EIF6	1.87197e-127	0.562805	0.575	0.1	3.87948e-123
ZNF222	1.91511e-127	0.665002	0.309	0.006	3.96888e-123
NDUFB3	2.18782e-127	0.746122	0.371	0.027	4.53403e-123
COPS2	2.43502e-127	0.484369	0.824	0.205	5.04634e-123
N4BP2L1	3.45407e-127	0.518977	0.563	0.093	7.15821e-123
LTC4S	3.8912e-127	0.562821	0.746	0.168	8.06413e-123
TBXAS1	4.3689e-127	0.622463	0.39	0.031	9.05411e-123
ASPH	4.77904e-127	0.563538	0.432	0.045	9.90408e-123
MED6	5.85369e-127	0.506152	0.565	0.094	1.21312e-122
COPE	5.86381e-127	0.58937	0.914	0.243	1.21522e-122
RHOA	6.14019e-127	0.743369	0.978	0.293	1.27249e-122
PLEK	6.15398e-127	-1.47722	0.938	0.791	1.27535e-122
CD82	6.33666e-127	0.409173	0.661	0.128	1.31321e-122
RNF130	6.55688e-127	0.602707	0.628	0.123	1.35885e-122
FAM219B	6.66266e-127	0.602942	0.421	0.041	1.38077e-122
RMND5A	7.93134e-127	0.54275	0.481	0.063	1.64369e-122
SDSL	9.42644e-127	0.674751	0.365	0.024	1.95354e-122
NAT14	1.67543e-126	0.676591	0.281	0	3.47217e-122
KYAT3	1.95079e-126	0.675226	0.319	0.01	4.04283e-122
TSTA3	2.4505e-126	0.688401	0.417	0.043	5.07842e-122
WDR61	2.56668e-126	0.67522	0.388	0.032	5.31919e-122
CHCHD3	2.73672e-126	0.630542	0.413	0.04	5.67158e-122
NECTIN2	3.46594e-126	0.484678	0.554	0.09	7.18281e-122
SPATA2	3.47292e-126	0.514101	0.48	0.063	7.19728e-122
RPGR	3.8667e-126	0.449802	0.617	0.115	8.01336e-122
MED1	3.99258e-126	0.659746	0.384	0.03	8.27423e-122
ARID5A	4.23697e-126	0.339367	0.795	0.18	8.78069e-122
CEP57	4.51226e-126	0.620137	0.411	0.04	9.3512e-122
SPATA2L	4.69325e-126	0.583103	0.407	0.036	9.72629e-122
USP12	7.4142e-126	0.531455	0.648	0.132	1.53652e-121
STT3B	8.22728e-126	0.435027	0.697	0.149	1.70502e-121
MAPKAPK5-AS1	1.18807e-125	0.563033	0.423	0.043	2.46216e-121
TPGS1	1.2748e-125	0.514353	0.517	0.078	2.64189e-121
PPP1R15B	1.69983e-125	-1.97263	0.742	0.765	3.52273e-121
HOTAIRM1	1.85817e-125	0.651068	0.554	0.094	3.85088e-121
TMEM220	2.38699e-125	0.659685	0.279	0	4.9468e-121
PHF20	2.44531e-125	0.528952	0.553	0.093	5.06766e-121
PTPN1	2.86239e-125	0.496589	0.487	0.065	5.93202e-121
AC007952.4	3.05e-125	-2.67834	0.23	0.626	6.32082e-121
MTF2	3.15118e-125	0.543209	0.547	0.09	6.5305e-121
GNAI2	4.04397e-125	0.748572	0.981	0.282	8.38071e-121
ZNF254	4.98945e-125	0.609078	0.39	0.032	1.03401e-120
EXOSC6	7.09001e-125	0.393427	0.675	0.138	1.46933e-120
ERF	7.11863e-125	0.590705	0.445	0.051	1.47526e-120
TSC22D2	7.25228e-125	0.481377	0.72	0.16	1.50296e-120
HEXA	7.50744e-125	0.511386	0.805	0.198	1.55584e-120
RBM33	9.04236e-125	0.358314	0.658	0.131	1.87394e-120
TLE3	9.32321e-125	0.471421	0.568	0.098	1.93214e-120
LAMP2	1.24494e-124	0.479154	0.671	0.14	2.58002e-120
RCN1	1.43723e-124	0.599508	0.382	0.03	2.97852e-120
GATA2	1.99842e-124	0.704511	0.283	0.002	4.14152e-120
ABCE1	2.62918e-124	0.596169	0.425	0.046	5.44871e-120
CRIPT	2.83173e-124	0.506298	0.541	0.088	5.86847e-120
MRPS22	2.95879e-124	0.612288	0.354	0.021	6.1318e-120
HLA-B	3.046e-124	-0.695624	0.999	0.864	6.31253e-120
RPLP1	6.99234e-124	0.643098	1	0.531	1.44909e-119
ROMO1	7.49748e-124	0.571953	0.676	0.146	1.55378e-119
PSMC3	7.59031e-124	0.40598	0.608	0.114	1.57302e-119
MMP24OS	8.65603e-124	0.545068	0.567	0.1	1.79388e-119
CHRAC1	8.903e-124	0.658855	0.401	0.038	1.84506e-119
FKBP3	9.89304e-124	0.620099	0.423	0.046	2.05023e-119
ITM2A	1.2743e-123	0.70409	0.275	0	2.64086e-119
SERPING1	1.2743e-123	0.679032	0.275	0	2.64086e-119
GAR1	1.63513e-123	0.643055	0.354	0.023	3.38865e-119
ELMO1	1.71098e-123	0.485492	0.502	0.072	3.54584e-119
LIPA	1.8415e-123	0.683612	0.309	0.009	3.81633e-119
RNF168	2.99511e-123	0.559178	0.496	0.072	6.20707e-119
SLC35E1	3.24975e-123	0.471665	0.513	0.076	6.73479e-119
PAFAH1B2	5.06778e-123	0.425091	0.782	0.19	1.05025e-118
STAU1	6.3721e-123	0.634091	0.414	0.042	1.32055e-118
NELFE	7.86243e-123	0.618826	0.44	0.053	1.62941e-118
ZNHIT1	7.91813e-123	0.482745	0.715	0.163	1.64095e-118
BCL7C	8.97367e-123	0.704771	0.453	0.06	1.8597e-118
TMEM9B	1.74829e-122	0.64964	0.419	0.045	3.62316e-118
SEPHS2	1.75385e-122	0.59429	0.416	0.043	3.63468e-118
DTD1	2.10667e-122	0.6874	0.339	0.019	4.36586e-118
TMEM11	2.51728e-122	0.498759	0.461	0.059	5.21682e-118
CIR1	2.99057e-122	0.424783	0.738	0.168	6.19766e-118
LRBA	3.11387e-122	0.410767	0.544	0.088	6.45318e-118
RAD23B	3.35705e-122	0.500048	0.539	0.088	6.95716e-118
CYB5R3	3.42747e-122	0.605806	0.44	0.053	7.10308e-118
UFM1	4.77051e-122	0.415202	0.761	0.18	9.8864e-118
SNX17	5.23434e-122	0.607726	0.377	0.03	1.08476e-117
RPS28	5.86497e-122	0.934688	1	0.386	1.21546e-117
MRPS12	7.08484e-122	0.666031	0.367	0.028	1.46826e-117
RTF1	8.41659e-122	0.404752	0.853	0.216	1.74425e-117
DDRGK1	1.1615e-121	0.616469	0.435	0.052	2.4071e-117
NSFL1C	1.63976e-121	0.430612	0.568	0.099	3.39823e-117
ARIH2	2.38178e-121	0.442105	0.519	0.082	4.93601e-117
TIPRL	2.47157e-121	0.589754	0.401	0.039	5.12208e-117
IL12A-AS1	2.52702e-121	0.689778	0.27	0	5.23699e-117
PARL	2.68044e-121	0.620578	0.489	0.073	5.55494e-117
MIEN1	5.02364e-121	0.606008	0.444	0.056	1.0411e-116
PHF5A	7.64156e-121	0.691501	0.337	0.02	1.58364e-116
RO60	9.2119e-121	0.47588	0.554	0.095	1.90907e-116
GPAT3	9.46002e-121	0.685107	0.269	0	1.96049e-116
NAA10	1.07313e-120	0.446816	0.628	0.127	2.22396e-116
RPL10	1.13194e-120	0.818973	1	0.539	2.34584e-116
ALG5	1.15813e-120	0.591178	0.344	0.021	2.4001e-116
PPA2	1.24026e-120	0.547018	0.439	0.054	2.57031e-116
MANF	1.49338e-120	0.596021	0.417	0.045	3.09489e-116
NUCKS1	1.82149e-120	0.534504	0.635	0.133	3.77485e-116
TXNRD1	1.91115e-120	0.452555	0.555	0.095	3.96067e-116
SVIP	2.21116e-120	0.61903	0.382	0.034	4.5824e-116
NPM2	2.50821e-120	0.590173	0.379	0.032	5.19801e-116
ATIC	2.70179e-120	0.655556	0.361	0.027	5.5992e-116
TOMM40	3.82995e-120	0.538892	0.445	0.056	7.93719e-116
RSF1	4.08476e-120	0.39825	0.666	0.139	8.46526e-116
IER5L	5.15971e-120	0.53152	0.501	0.075	1.0693e-115
TM9SF3	7.77761e-120	0.455269	0.872	0.234	1.61183e-115
KARS	8.18014e-120	0.583588	0.49	0.075	1.69525e-115
SF3A1	9.9208e-120	0.559001	0.423	0.048	2.05599e-115
JAK1	1.26696e-119	0.53686	0.443	0.055	2.62566e-115
ELOB	1.27287e-119	0.711069	0.98	0.283	2.63789e-115
CENPX	1.34317e-119	0.590309	0.407	0.043	2.78358e-115
GPN1	1.51561e-119	0.613446	0.356	0.026	3.14094e-115
TRGC1	1.64548e-119	0.592146	0.432	0.052	3.4101e-115
JPX	2.04027e-119	0.372882	0.726	0.166	4.22826e-115
RPS26	2.24605e-119	0.970349	1	0.381	4.65471e-115
DGCR6L	3.23411e-119	0.639878	0.439	0.056	6.70238e-115
OSM	4.24926e-119	0.873263	0.323	0.016	8.80616e-115
ASAH1	4.52928e-119	0.446774	0.906	0.241	9.38648e-115
BIN2	4.55295e-119	0.575629	0.417	0.046	9.43553e-115
SND1	4.64163e-119	0.628336	0.441	0.056	9.61931e-115
DERL1	6.21351e-119	0.417747	0.64	0.13	1.28769e-114
UXS1	6.6324e-119	0.590308	0.33	0.018	1.3745e-114
PELI1	6.63796e-119	0.340343	0.711	0.158	1.37565e-114
SBNO1	6.88255e-119	0.384109	0.695	0.154	1.42634e-114
TEX30	6.93916e-119	0.637309	0.297	0.008	1.43807e-114
RBM38	6.96112e-119	0.510691	0.451	0.058	1.44262e-114
ECI1	9.97011e-119	0.629043	0.38	0.035	2.06621e-114
USP53	1.15595e-118	0.647422	0.346	0.023	2.3956e-114
PPDPF	1.20063e-118	0.64122	0.939	0.27	2.48819e-114
GLUL	1.36714e-118	0.549768	0.916	0.26	2.83326e-114
IPO7	1.75495e-118	0.520949	0.522	0.085	3.63696e-114
CTDP1	1.77188e-118	0.543868	0.396	0.039	3.67204e-114
CDIP1	1.84009e-118	0.63936	0.264	0	3.8134e-114
GIPC1	1.84009e-118	0.6527	0.264	0	3.8134e-114
TMEM87A	1.99984e-118	0.567042	0.437	0.053	4.14448e-114
FTH1	2.20203e-118	-0.6065	1	0.905	4.56348e-114
DCUN1D3	4.14097e-118	0.648453	0.299	0.009	8.58174e-114
VASP	4.95385e-118	0.457829	0.772	0.187	1.02664e-113
NAA50	5.74394e-118	0.481849	0.496	0.076	1.19037e-113
FBXO33	6.48678e-118	0.453448	0.612	0.123	1.34432e-113
DEAF1	1.03656e-117	0.517258	0.376	0.033	2.14816e-113
SYS1	1.04254e-117	0.570981	0.4	0.042	2.16055e-113
PIAS2	1.24331e-117	0.642471	0.34	0.021	2.57663e-113
DCAF7	1.24534e-117	0.598501	0.4	0.042	2.58084e-113
BCLAF1	1.27975e-117	-1.25293	0.975	0.801	2.65216e-113
AZU1	1.37323e-117	-1.16175	0.938	0.826	2.84589e-113
C12orf57	1.44422e-117	0.410206	0.852	0.221	2.99301e-113
MED8	1.64319e-117	0.621742	0.298	0.009	3.40534e-113
TBCC	1.80705e-117	0.586921	0.426	0.051	3.74492e-113
S1PR4	2.85868e-117	0.659625	0.339	0.021	5.92432e-113
FOSL1	2.94259e-117	0.402137	0.608	0.118	6.09822e-113
MRPL23	3.56421e-117	0.520716	0.608	0.124	7.38647e-113
HOMER3	4.20895e-117	0.406498	0.66	0.14	8.72262e-113
RNPS1	4.53802e-117	0.434935	0.898	0.245	9.40459e-113
GPATCH11	4.85614e-117	0.565065	0.431	0.053	1.00639e-112
CLK1	5.09693e-117	-1.42685	0.938	0.787	1.05629e-112
RPL11	5.95421e-117	0.807427	1	0.514	1.23395e-112
DRAM1	6.27732e-117	0.525286	0.44	0.055	1.30091e-112
PDLIM2	1.03964e-116	0.591823	0.4	0.042	2.15456e-112
COMMD9	1.10823e-116	0.551625	0.431	0.054	2.2967e-112
SLC2A4RG	1.27769e-116	0.538264	0.446	0.059	2.64789e-112
POP5	1.38722e-116	0.597821	0.39	0.039	2.87487e-112
HDHD2	2.573e-116	0.602735	0.323	0.017	5.33228e-112
ACTG1	2.88257e-116	1.00786	1	0.392	5.97384e-112
MTMR6	3.15258e-116	0.548335	0.416	0.047	6.53342e-112
NECAP2	3.18214e-116	0.533406	0.493	0.078	6.59466e-112
MZB1	3.52452e-116	0.700803	0.26	0	7.30422e-112
SNHG25	3.66691e-116	-2.09661	0.615	0.722	7.59931e-112
SSR1	3.74412e-116	0.514139	0.516	0.087	7.75932e-112
RHOF	6.89332e-116	0.396051	0.621	0.129	1.42857e-111
LEPROT	7.10935e-116	0.453912	0.622	0.129	1.47334e-111
SPTY2D1	7.12573e-116	0.369163	0.719	0.166	1.47674e-111
MED17	7.88312e-116	0.4406	0.603	0.118	1.6337e-111
SLC25A11	8.0591e-116	0.567054	0.378	0.036	1.67017e-111
RRAGA	1.00418e-115	0.616771	0.355	0.028	2.08107e-111
SCAND1	1.10119e-115	0.476468	0.9	0.244	2.28211e-111
GPX7	1.30805e-115	0.627765	0.258	0	2.7108e-111
MRPS16	1.75546e-115	0.615458	0.382	0.038	3.63802e-111
FHIT	1.89574e-115	0.610398	0.309	0.013	3.92874e-111
NIPSNAP1	2.14806e-115	0.629735	0.297	0.01	4.45164e-111
STX8	2.63737e-115	0.653505	0.367	0.033	5.46569e-111
CCNI	3.36462e-115	0.906868	0.998	0.353	6.97284e-111
LCOR	4.62227e-115	0.387325	0.641	0.134	9.57919e-111
BCL10	4.83083e-115	0.506435	0.493	0.077	1.00114e-110
SERINC1	4.90604e-115	0.440491	0.549	0.098	1.01673e-110
TSPOAP1	4.93302e-115	0.50482	0.461	0.063	1.02232e-110
SYF2	5.43913e-115	0.551666	0.945	0.276	1.1272e-110
SYNJ2	5.564e-115	0.566573	0.365	0.031	1.15308e-110
SNW1	5.8624e-115	0.336163	0.709	0.161	1.21492e-110
VPS28	6.69222e-115	0.411447	0.761	0.189	1.3869e-110
FRG1	6.76303e-115	0.53413	0.467	0.069	1.40157e-110
STK38L	6.94959e-115	0.607707	0.356	0.029	1.44023e-110
AATF	7.9755e-115	0.546394	0.39	0.041	1.65284e-110
OGFOD3	8.61248e-115	0.617892	0.306	0.013	1.78485e-110
MED10	9.03935e-115	0.536536	0.431	0.055	1.87332e-110
LINC01578	1.02972e-114	-1.04586	0.995	0.79	2.13398e-110
ABCB7	1.26862e-114	0.528777	0.379	0.036	2.6291e-110
MRPL40	1.43755e-114	0.617025	0.325	0.02	2.97917e-110
PBDC1	1.69911e-114	0.426991	0.536	0.094	3.52124e-110
NTNG2	1.77455e-114	0.574213	0.305	0.013	3.67757e-110
EIF4EBP1	1.7907e-114	0.642156	0.413	0.05	3.71104e-110
KPNA3	2.02673e-114	0.439913	0.463	0.065	4.20019e-110
HCG18	2.6796e-114	0.554164	0.406	0.046	5.55321e-110
SLC39A1	3.66115e-114	0.604888	0.305	0.013	7.58737e-110
SURF4	3.70964e-114	0.38842	0.694	0.159	7.68786e-110
COX20	4.82822e-114	0.502594	0.568	0.108	1.0006e-109
RNF138	6.09782e-114	0.436452	0.621	0.131	1.26371e-109
MRPL44	6.26767e-114	0.478919	0.499	0.081	1.29891e-109
CD63	6.6654e-114	0.711834	0.984	0.309	1.38134e-109
MRPL12	7.07564e-114	0.496596	0.492	0.079	1.46636e-109
ZNF264	9.92466e-114	0.631597	0.291	0.01	2.05679e-109
SFT2D1	1.04703e-113	0.637257	0.372	0.036	2.16987e-109
SNHG10	1.05202e-113	0.554721	0.365	0.032	2.18021e-109
ZRANB1	1.19762e-113	0.472381	0.441	0.058	2.48194e-109
TEN1	1.3755e-113	0.427497	0.508	0.085	2.85059e-109
HIF1A	1.64725e-113	-1.70261	0.835	0.765	3.41376e-109
STOM	1.6769e-113	0.612327	0.289	0.01	3.4752e-109
TFDP1	1.80907e-113	0.601129	0.4	0.045	3.74911e-109
SLC30A5	1.94173e-113	0.56343	0.379	0.038	4.02405e-109
CTNNB1	2.71957e-113	-1.25424	0.965	0.789	5.63603e-109
RPS19	2.84419e-113	0.851383	1	0.476	5.89431e-109
PKIG	3.02524e-113	0.625651	0.274	0.005	6.26951e-109
RAD23A	3.9123e-113	0.412455	0.687	0.16	8.10785e-109
POLR3GL	4.49244e-113	0.649018	0.364	0.034	9.31013e-109
RBM15B	5.20543e-113	0.512111	0.368	0.034	1.07877e-108
DPM3	5.65151e-113	0.6224	0.489	0.081	1.17122e-108
LCMT1	5.73632e-113	0.582534	0.306	0.014	1.18879e-108
CTDNEP1	6.79851e-113	0.46554	0.598	0.124	1.40892e-108
CTNND1	7.0558e-113	0.510375	0.341	0.025	1.46224e-108
ADI1	7.18109e-113	0.629381	0.383	0.04	1.48821e-108
EIF1B	8.96822e-113	0.667014	0.987	0.315	1.85857e-108
IFITM3	9.07832e-113	0.653616	0.252	0	1.88139e-108
VPS29	1.28136e-112	0.425814	0.635	0.138	2.6555e-108
NFIC	1.84121e-112	0.433039	0.544	0.101	3.81573e-108
PMAIP1	1.85252e-112	0.650193	0.925	0.279	3.83916e-108
FAM32A	2.35872e-112	0.471017	0.463	0.069	4.88821e-108
NOL12	2.59398e-112	0.595276	0.346	0.027	5.37577e-108
MRPL32	2.74187e-112	0.508701	0.407	0.047	5.68226e-108
RASSF1	3.39023e-112	0.329081	0.592	0.117	7.02591e-108
SMIM3	3.87217e-112	0.392072	0.641	0.14	8.02468e-108
COMMD8	3.91826e-112	0.643936	0.337	0.025	8.12021e-108
UROD	4.09495e-112	0.59021	0.358	0.032	8.48638e-108
CHMP3	4.9296e-112	0.62794	0.432	0.06	1.02161e-107
SMIM7	5.96146e-112	0.463711	0.477	0.075	1.23545e-107
NT5C	6.90658e-112	0.459122	0.541	0.101	1.43132e-107
CREB5	7.18556e-112	0.628813	0.447	0.064	1.48913e-107
TMEM134	8.65905e-112	0.618653	0.323	0.021	1.7945e-107
RPS24	1.0491e-111	0.743942	1	0.519	2.17416e-107
CDCA7L	1.23497e-111	0.593868	0.25	0	2.55935e-107
ZG16B	1.23497e-111	0.620564	0.25	0	2.55935e-107
REX1BD	1.25951e-111	0.431046	0.828	0.22	2.61022e-107
GLRX	1.41245e-111	0.621207	0.33	0.024	2.92716e-107
PPP1R35	1.90972e-111	0.409717	0.51	0.087	3.95771e-107
VPS26A	1.94661e-111	0.453973	0.563	0.108	4.03416e-107
MPC1	2.25186e-111	0.545897	0.384	0.041	4.66675e-107
HPS1	2.33624e-111	0.449834	0.48	0.076	4.84162e-107
MED19	2.39058e-111	0.599388	0.38	0.04	4.95423e-107
NGDN	2.41114e-111	0.465466	0.502	0.085	4.99686e-107
LYN	2.80121e-111	0.371087	0.739	0.181	5.80522e-107
PPIH	3.91214e-111	0.602456	0.366	0.035	8.10752e-107
ZFAND2A	5.06646e-111	0.48907	0.537	0.099	1.04997e-106
DDX52	5.95643e-111	0.348923	0.721	0.173	1.23441e-106
TARS	6.38962e-111	0.506839	0.449	0.065	1.32418e-106
SFPQ	6.64141e-111	-0.883291	0.998	0.825	1.37637e-106
ZNF529	6.93738e-111	0.540453	0.354	0.031	1.4377e-106
MLEC	7.53874e-111	0.320843	0.581	0.114	1.56233e-106
NAA38	9.79591e-111	0.481586	0.767	0.191	2.0301e-106
CDKN1A	1.17197e-110	0.45969	0.606	0.127	2.4288e-106
NDUFB6	1.18979e-110	0.619453	0.295	0.013	2.46573e-106
RAB5A	1.40943e-110	0.422907	0.507	0.086	2.9209e-106
UBE2K	1.45601e-110	0.483833	0.488	0.08	3.01743e-106
AGPAT2	1.60237e-110	0.502763	0.432	0.059	3.32076e-106
PTPN11	2.11983e-110	0.555207	0.361	0.034	4.39313e-106
ZCCHC10	2.3127e-110	0.573358	0.398	0.047	4.79285e-106
PSMG4	2.93019e-110	0.587732	0.301	0.015	6.07252e-106
GID8	3.04952e-110	0.449828	0.531	0.097	6.31983e-106
STX12	3.18774e-110	0.541382	0.392	0.045	6.60627e-106
GNAS	3.20808e-110	-0.80612	0.999	0.821	6.64844e-106
EIF4E2	3.27796e-110	0.51484	0.402	0.048	6.79324e-106
PWP1	3.56057e-110	0.580166	0.307	0.017	7.37892e-106
RPLP2	3.75877e-110	0.893995	1	0.368	7.78969e-106
ZDHHC2	4.33135e-110	0.581346	0.325	0.023	8.97628e-106
DCXR	5.42321e-110	0.496757	0.616	0.135	1.12391e-105
ZC3HAV1	7.28002e-110	0.398189	0.557	0.106	1.50871e-105
MPP1	1.24395e-109	0.45494	0.468	0.072	2.57797e-105
PLAA	1.32978e-109	0.505244	0.427	0.058	2.75584e-105
ANKRD12	1.4699e-109	0.267659	0.742	0.179	3.04623e-105
SRI	1.47074e-109	0.401875	0.67	0.156	3.04795e-105
RAB21	1.50595e-109	0.372003	0.703	0.168	3.12094e-105
CHMP5	1.66354e-109	0.589875	0.356	0.033	3.44752e-105
PSMD6	1.75518e-109	0.265148	0.73	0.174	3.63744e-105
FAAP20	1.77583e-109	0.282298	0.664	0.15	3.68023e-105
SPN	1.87635e-109	0.330358	0.818	0.216	3.88854e-105
KLHL24	1.9981e-109	0.398827	0.577	0.116	4.14087e-105
AIG1	2.25941e-109	0.595371	0.245	0	4.6824e-105
PSMC2	2.27105e-109	0.50173	0.395	0.046	4.70652e-105
TMF1	4.19719e-109	0.357657	0.712	0.172	8.69826e-105
HIKESHI	4.53839e-109	0.611019	0.31	0.019	9.40536e-105
BNIP2	5.0696e-109	0.355297	0.664	0.151	1.05062e-104
NIPSNAP3A	5.37817e-109	0.532858	0.391	0.045	1.11457e-104
BLZF1	5.53909e-109	0.559375	0.355	0.032	1.14792e-104
UTP18	7.01185e-109	0.488517	0.403	0.049	1.45314e-104
TOB2	7.75476e-109	0.335819	0.592	0.121	1.6071e-104
CSTA	7.95731e-109	0.522189	0.769	0.191	1.64907e-104
SRD5A3	8.28988e-109	0.590399	0.244	0	1.718e-104
ANPEP	8.28988e-109	0.638677	0.244	0	1.718e-104
COL4A5	8.28988e-109	0.604547	0.244	0	1.718e-104
PPHLN1	8.36526e-109	0.343734	0.809	0.214	1.73362e-104
NTMT1	9.41277e-109	0.578259	0.315	0.02	1.9507e-104
ZNF136	9.41928e-109	0.515565	0.373	0.039	1.95205e-104
URM1	1.023e-108	0.559168	0.37	0.038	2.12006e-104
MRPS18B	1.17999e-108	0.600327	0.287	0.012	2.4454e-104
QARS	1.23019e-108	0.34343	0.599	0.124	2.54945e-104
ATP6V0D1	1.38666e-108	0.420394	0.513	0.092	2.87372e-104
SNX5	1.41278e-108	0.368775	0.604	0.127	2.92785e-104
PSENEN	1.4825e-108	0.632941	0.325	0.024	3.07234e-104
PPP1CA	1.58427e-108	0.432879	0.636	0.14	3.28324e-104
ZEB1	1.85867e-108	0.591068	0.282	0.01	3.85191e-104
DNAJC21	1.88608e-108	0.344419	0.59	0.12	3.90871e-104
SGTA	1.96822e-108	0.316197	0.556	0.105	4.07895e-104
SSH2	1.97999e-108	0.439386	0.567	0.115	4.10333e-104
HOXB6	2.99129e-108	0.558555	0.331	0.025	6.19914e-104
TMEM183A	3.21151e-108	0.490842	0.487	0.083	6.65553e-104
MRPL48	4.98737e-108	0.606723	0.313	0.02	1.03358e-103
TMBIM4	5.65704e-108	0.369233	0.616	0.133	1.17236e-103
SNRPD3	5.69735e-108	0.545162	0.465	0.077	1.18072e-103
ING5	6.44255e-108	0.423524	0.403	0.049	1.33515e-103
DYNC1LI1	6.95915e-108	0.461188	0.434	0.061	1.44221e-103
POLR2G	7.10866e-108	0.507569	0.451	0.069	1.4732e-103
KRT8	7.93546e-108	0.638741	0.261	0.005	1.64454e-103
CTDSP2	8.32716e-108	0.517939	0.385	0.043	1.72572e-103
AC025159.1	9.33059e-108	0.444611	0.478	0.078	1.93367e-103
SUCLG2	1.06478e-107	0.601393	0.34	0.03	2.20664e-103
RHOG	1.28631e-107	0.422236	0.821	0.221	2.66575e-103
DECR1	1.36244e-107	0.507124	0.359	0.034	2.82353e-103
LINC-PINT	1.39349e-107	0.413861	0.78	0.206	2.88786e-103
SMU1	1.62027e-107	0.399376	0.501	0.086	3.35785e-103
INTS10	1.78015e-107	0.403608	0.475	0.076	3.68919e-103
CETN2	2.20351e-107	0.593914	0.313	0.021	4.56655e-103
C7orf50	2.33847e-107	0.572011	0.411	0.055	4.84625e-103
LYSMD3	2.92207e-107	0.602629	0.285	0.012	6.05571e-103
PHC2	3.13805e-107	0.586887	0.305	0.018	6.50328e-103
CMTM7	4.1225e-107	0.617757	0.301	0.017	8.54348e-103
DAP3	4.35127e-107	0.37193	0.556	0.112	9.01758e-103
RPAIN	5.10645e-107	0.386753	0.554	0.11	1.05826e-102
CSNK1E	5.85548e-107	0.353408	0.537	0.101	1.21349e-102
CAPNS1	6.01687e-107	0.487146	0.652	0.148	1.24694e-102
PRCP	6.59981e-107	0.502327	0.373	0.041	1.36774e-102
ARL6IP5	6.71567e-107	0.429749	0.639	0.147	1.39176e-102
SRA1	6.79858e-107	0.40117	0.505	0.089	1.40894e-102
ATP6V1D	6.90945e-107	0.524731	0.376	0.041	1.43192e-102
CZIB	7.05198e-107	0.569066	0.347	0.032	1.46145e-102
NGRN	7.28083e-107	0.479504	0.374	0.04	1.50888e-102
SFXN3	7.48733e-107	0.507564	0.446	0.068	1.55167e-102
OSBPL9	7.99852e-107	0.299853	0.605	0.128	1.65761e-102
SELENOS	8.3263e-107	0.45033	0.541	0.105	1.72554e-102
CISD2	1.11128e-106	0.617861	0.305	0.019	2.30301e-102
CTNNBIP1	1.13206e-106	0.571862	0.309	0.02	2.34608e-102
POLR2L	1.2906e-106	0.469372	0.824	0.219	2.67463e-102
RNF126	1.32813e-106	0.434664	0.512	0.094	2.75242e-102
DYNC1H1	1.42327e-106	0.399987	0.92	0.261	2.94959e-102
IFI44	1.48815e-106	0.587641	0.239	0	3.08405e-102
SH3GL1	3.23722e-106	0.420684	0.429	0.061	6.70881e-102
ALG13	3.4719e-106	0.267679	0.612	0.132	7.19517e-102
SREK1IP1	3.96679e-106	0.547661	0.417	0.057	8.22078e-102
DYNLT3	4.14057e-106	0.49191	0.453	0.07	8.58092e-102
AL133330.1	4.29628e-106	0.601567	0.313	0.021	8.90361e-102
PLAAT4	4.92337e-106	0.624475	0.289	0.014	1.02032e-101
RAB18	5.08343e-106	0.351502	0.611	0.134	1.05349e-101
MICU2	5.14263e-106	0.513372	0.379	0.043	1.06576e-101
NAA15	5.50673e-106	0.342113	0.574	0.117	1.14122e-101
MGAT4A	5.92758e-106	0.578344	0.281	0.011	1.22843e-101
EPC1	5.93378e-106	0.370515	0.898	0.257	1.22972e-101
STARD3NL	6.44703e-106	0.532298	0.331	0.027	1.33608e-101
IK	6.79763e-106	0.363239	0.535	0.101	1.40874e-101
TCEA2	7.0018e-106	0.551475	0.361	0.038	1.45105e-101
TSFM	9.0869e-106	0.568528	0.287	0.013	1.88317e-101
SUMF2	9.32154e-106	0.362496	0.739	0.187	1.9318e-101
HAUS4	9.65997e-106	0.55619	0.361	0.038	2.00193e-101
RAE1	1.1089e-105	0.347436	0.507	0.091	2.29808e-101
MSN	1.20294e-105	0.501071	0.929	0.281	2.49297e-101
RAB27A	1.29204e-105	0.50463	0.379	0.043	2.67761e-101
IMP3	1.35003e-105	0.553205	0.327	0.026	2.7978e-101
PPIA	1.71089e-105	0.908768	0.998	0.325	3.54564e-101
PSMC1	1.75634e-105	0.263892	0.635	0.142	3.63983e-101
CDKN2AIPNL	1.91393e-105	0.527513	0.334	0.028	3.96642e-101
HAVCR2	2.23088e-105	0.571895	0.305	0.019	4.62327e-101
GANAB	2.30965e-105	0.486376	0.458	0.075	4.78652e-101
MAP3K13	2.313e-105	0.625493	0.295	0.017	4.79347e-101
COPZ1	2.31473e-105	0.653381	0.348	0.035	4.79705e-101
CYCS	2.73977e-105	0.628977	0.951	0.292	5.6779e-101
TIMM8B	3.10664e-105	0.608302	0.394	0.051	6.43819e-101
PNRC2	3.44179e-105	0.383531	0.84	0.23	7.13276e-101
MAIP1	3.85184e-105	0.525558	0.315	0.022	7.98256e-101
GMPS	4.4257e-105	0.588476	0.355	0.037	9.17182e-101
Z93241.1	4.60437e-105	-2.71617	0.047	0.465	9.54209e-101
YY1	5.18723e-105	0.413146	0.866	0.247	1.075e-100
LRPPRC	5.39017e-105	0.383501	0.483	0.083	1.11706e-100
ZDHHC4	5.70993e-105	0.56223	0.297	0.017	1.18333e-100
EIF5A	6.28213e-105	0.803745	0.996	0.339	1.30191e-100
NT5M	6.54437e-105	0.502401	0.288	0.014	1.35626e-100
IFT52	6.85344e-105	0.585297	0.297	0.017	1.42031e-100
APPL1	7.64043e-105	0.314931	0.597	0.128	1.5834e-100
PRAM1	9.13595e-105	0.260693	0.574	0.116	1.89333e-100
NUTM2B-AS1	9.14537e-105	0.353604	0.593	0.128	1.89529e-100
ANTKMT	1.03895e-104	0.641112	0.394	0.053	2.15312e-100
ENDOV	1.36184e-104	0.464485	0.362	0.038	2.82228e-100
APLP2	1.50922e-104	0.457666	0.88	0.258	3.1277e-100
PGAM1	1.8981e-104	0.480072	0.532	0.105	3.93363e-100
RBBP7	2.05257e-104	0.322568	0.717	0.182	4.25375e-100
RBMX	2.09626e-104	0.46216	0.921	0.276	4.34429e-100
RICTOR	2.18041e-104	0.261139	0.737	0.184	4.51868e-100
GDE1	2.23794e-104	0.566205	0.341	0.032	4.63791e-100
MOAP1	2.26966e-104	0.444967	0.455	0.072	4.70365e-100
GTF2F2	2.65879e-104	0.575773	0.312	0.023	5.51008e-100
ZNF24	2.96485e-104	0.489069	0.415	0.057	6.14436e-100
PEMT	3.36189e-104	0.554459	0.298	0.018	6.96719e-100
MKLN1	3.60496e-104	0.434641	0.429	0.062	7.47092e-100
WDR48	4.22501e-104	0.363669	0.573	0.12	8.75592e-100
KLHL18	4.42263e-104	0.351133	0.498	0.088	9.16547e-100
NUDT16L1	4.73169e-104	0.531069	0.36	0.038	9.80596e-100
POLR2E	4.87916e-104	0.416048	0.539	0.108	1.01116e-99
ODF2L	6.27734e-104	0.455909	0.404	0.054	1.30092e-99
PRKCSH	6.93629e-104	0.38756	0.691	0.174	1.43748e-99
RPL37	7.68036e-104	0.64916	1	0.506	1.59168e-99
NDUFA9	9.32186e-104	0.528038	0.35	0.035	1.93186e-99
AC026124.2	9.7732e-104	0.535804	0.354	0.036	2.0254e-99
NDUFV2	1.47758e-103	0.328426	0.836	0.229	3.06214e-99
CSNK2A1	1.7927e-103	0.391258	0.551	0.114	3.7152e-99
H2AFZ	1.82647e-103	0.467211	0.957	0.286	3.78518e-99
DIS3	1.94865e-103	0.371267	0.488	0.085	4.03837e-99
FAM174C	2.35058e-103	0.581131	0.368	0.043	4.87134e-99
UQCC2	2.70952e-103	0.588638	0.401	0.055	5.61522e-99
ZFAND6	3.18949e-103	0.303465	0.788	0.21	6.60991e-99
MBD2	3.51143e-103	0.436336	0.428	0.063	7.27709e-99
LIMD2	3.67839e-103	0.276452	0.833	0.226	7.62309e-99
HEXB	4.67612e-103	0.467398	0.397	0.052	9.6908e-99
MAP7	5.4098e-103	0.558574	0.257	0.006	1.12113e-98
G3BP1	5.65933e-103	0.420396	0.477	0.083	1.17284e-98
SDF2	5.94571e-103	0.350856	0.531	0.102	1.23219e-98
CHCHD1	7.67072e-103	0.566545	0.355	0.039	1.58968e-98
TGIF2	8.36942e-103	0.5191	0.33	0.029	1.73448e-98
TXNDC9	8.85162e-103	0.560821	0.267	0.01	1.83441e-98
CHMP6	8.99126e-103	0.563652	0.299	0.019	1.86335e-98
SMC3	9.14191e-103	0.34848	0.502	0.092	1.89457e-98
SEC63	1.11126e-102	0.400762	0.539	0.108	2.30297e-98
NIBAN1	1.13035e-102	0.572748	0.252	0.005	2.34254e-98
CYC1	1.16317e-102	0.267245	0.785	0.21	2.41056e-98
NR4A3	1.19645e-102	0.633897	0.256	0.006	2.47953e-98
PDXK	1.77627e-102	0.332568	0.476	0.082	3.68114e-98
NUS1	1.79509e-102	0.491632	0.353	0.037	3.72015e-98
CMTM6	1.8156e-102	0.421082	0.91	0.27	3.76264e-98
ZNF44	1.83468e-102	0.458144	0.401	0.054	3.8022e-98
RNASEH1	1.93164e-102	0.502433	0.339	0.032	4.00313e-98
HSP90B1	2.01026e-102	-1.11378	0.989	0.816	4.16607e-98
FUCA2	2.30496e-102	0.576749	0.329	0.029	4.77679e-98
SKI	2.87095e-102	0.495554	0.385	0.048	5.94977e-98
ADIPOR1	2.89399e-102	0.422098	0.458	0.075	5.99751e-98
HAUS2	3.4977e-102	0.527101	0.324	0.027	7.24863e-98
MIR1-1HG-AS1	4.58322e-102	0.582055	0.23	0	9.49826e-98
SH3D21	5.0841e-102	0.523018	0.306	0.021	1.05363e-97
GGCX	5.09734e-102	0.545051	0.33	0.03	1.05637e-97
DUSP11	5.10765e-102	0.548386	0.281	0.014	1.05851e-97
SLC66A2	5.2111e-102	0.403874	0.469	0.079	1.07995e-97
CIAO2A	5.46058e-102	0.565208	0.28	0.014	1.13165e-97
THG1L	6.15557e-102	0.566484	0.27	0.011	1.27568e-97
OAF	7.18444e-102	0.520028	0.304	0.021	1.4889e-97
IMPA2	8.60169e-102	0.557352	0.304	0.022	1.78261e-97
HSH2D	9.04686e-102	-1.64342	0.859	0.767	1.87487e-97
COG3	1.02462e-101	0.434871	0.489	0.089	2.12342e-97
FKBP8	1.07669e-101	0.365315	0.812	0.225	2.23132e-97
SERPINE1	1.08172e-101	0.620072	0.297	0.019	2.24176e-97
SLIRP	1.25077e-101	0.52544	0.449	0.075	2.59209e-97
VMA21	1.33021e-101	0.284382	0.64	0.147	2.75673e-97
HOPX	1.38814e-101	0.6698	0.231	0.001	2.87679e-97
C5orf24	1.41773e-101	0.356632	0.488	0.087	2.93809e-97
MBD4	1.47416e-101	0.393694	0.583	0.129	3.05506e-97
CAVIN2	1.66111e-101	0.590601	0.228	0	3.44248e-97
AK6	2.60676e-101	0.591766	0.269	0.011	5.40225e-97
KCTD20	3.13522e-101	0.467423	0.37	0.043	6.49744e-97
PRPF6	3.16791e-101	0.5282	0.404	0.057	6.56519e-97
TSPAN3	3.84375e-101	0.484319	0.364	0.041	7.96579e-97
ATP5F1B	4.50244e-101	0.678637	0.977	0.32	9.33086e-97
LDLR	4.61677e-101	-2.44029	0.172	0.546	9.5678e-97
SON	4.88337e-101	-1.26438	0.971	0.791	1.01203e-96
PUM1	5.02507e-101	0.281632	0.739	0.191	1.0414e-96
RTCA	5.64365e-101	0.484671	0.392	0.052	1.16959e-96
NUDT2	6.01477e-101	0.569729	0.227	0	1.2465e-96
AL356055.1	6.01477e-101	0.59349	0.227	0	1.2465e-96
UBQLN1	6.73106e-101	0.334204	0.81	0.224	1.39495e-96
PPP2R2D	7.03284e-101	0.334497	0.486	0.088	1.45749e-96
TOX4	7.85804e-101	0.364875	0.688	0.173	1.6285e-96
SDF4	9.78192e-101	0.446646	0.472	0.084	2.02721e-96
MRPL10	1.19701e-100	0.483517	0.342	0.035	2.48069e-96
EEF1AKMT2	1.39523e-100	0.439939	0.376	0.046	2.89147e-96
RER1	1.50184e-100	0.355449	0.471	0.083	3.11241e-96
WDR82	2.45165e-100	0.369564	0.48	0.086	5.0808e-96
PTPMT1	2.47496e-100	0.52747	0.361	0.042	5.12911e-96
LARP1	2.87616e-100	0.425324	0.443	0.071	5.96056e-96
TLE4	3.81997e-100	-1.86953	0.719	0.723	7.91652e-96
MRPS25	4.39453e-100	0.282244	0.501	0.094	9.10723e-96
METTL5	4.61302e-100	0.550468	0.291	0.018	9.56003e-96
CACYBP	4.69268e-100	0.341619	0.635	0.149	9.72512e-96
PDCL3	4.87499e-100	0.586721	0.262	0.01	1.01029e-95
[truncated: 2,139 more rows]

## Sheet: PAVBFN-ALL-12vsD
gene_sym	p_val	avg_log2FC	pct.1	pct.2	p_val_adj
[truncated: 1,463 more rows]

[truncated: 47 more sheets: PAVBFN-ALL-9vsD, PAVBFN-ALL-6vsD, PAVBFN-ALL-3vsD, PAVBFN-ALL-2vsD, PAVBFN-ALL-1vsD, PAUVAT-ALL-16vsD, PAUVAT-ALL-15vsD, PAUVAT-ALL-13vsD, PAUVAT-ALL-3vsD, PAUVAT-ALL-1vsD, _PAUNSY-ALL-13vsD, PAUNSY-ALL-7vsD, PAUNSY-ALL-6vsD, PAUNSY-ALL-4vsD, PAUNSY-ALL-3vsD, PAUNSY-ALL-1vsD, PAUMTZ-ALL-9vsD, PAUMTZ-ALL-4vsD, PAUMTZ-ALL-2vsD, PARBIU-ALL-16vsD …]
